# Supplementary material for: Hypothalamus proteomics from mouse models with obesity and anorexia reveals therapeutic targets of appetite regulation
Source: PubMed Central journal article supplement (PMC4855256; doi:10.1038/nutd.2016.10), 2016-04-25
Supplement: nutd201610x5.pdf [file nutd201610x5.pdf]

Supplementary Table 2. Total proteome

| Accession | Description                                                                                                               | ΣCoverage | Σ# Proteins | Unique Pepti | Σ# Peptides | Σ# PSMs | HFD1/C1 | HFD2/C1 | LPS1/C2 | LPS2/C2 | Score A(3,6) | coverage A(3) | Peptides A(3,# PSM A(3,6) | # AAs | MW [kDa] | calc. pI |      |
|-----------|---------------------------------------------------------------------------------------------------------------------------|-----------|-------------|--------------|-------------|---------|---------|---------|---------|---------|--------------|---------------|---------------------------|-------|----------|----------|------|
| Q9D902    | General transcription factor IIE subunit 2<br>OS=Mus musculus<br>GN=Gr2e2 PE=2 SV=2 - [T2EB_MOUSE]                        | 15.41     | 1           | 4            | 5           | 8       | 0.695   | 0.148   | 0.018   | 0.013   | 19.03        | 15.41         | 6                         | 8     | 292      | 33.0     | 9.64 |
| Q62056    | MCG130054 OS=Mus musculus<br>GN=Psg17 PE=2 SV=1 - [Q62056_MOUSE]                                                          | 1.68      | 1           | 1            | 1           | 1       | 2.849   | 0.107   | 0.034   | 0.019   | 0.00         | 1.68          | 1                         | 1     | 475      | 52.9     | 7.44 |
| D6MZJ6    | MCG22096 OS=Mus musculus<br>GN=Smpd5 PE=2 SV=1 - [D6MZJ6_MOUSE]                                                           | 3.73      | 1           | 1            | 1           | 1       | 4.156   | 0.292   | 0.016   | 0.019   | 1.91         | 3.73          | 1                         | 1     | 483      | 53.8     | 8.65 |
| P49772-4  | Isoform 4 of Fms-related tyrosine kinase 3 ligand<br>OS=Mus musculus<br>GN=Fl3lg -                                        | 3.95      | 1           | 1            | 1           | 1       | 3.788   | 0.040   | 0.019   | 0.021   | 0.00         | 3.95          | 1                         | 1     | 253      | 28.2     | 8.63 |
| G3X9G6    | Luteinizing hormone beta<br>OS=Mus musculus<br>GN=Lhb PE=3 SV=1 - [G3X9G6_MOUSE]                                          | 21.99     | 2           | 2            | 2           | 9       | 0.203   | 0.133   | 0.036   | 0.033   | 21.98        | 21.99         | 4                         | 9     | 141      | 15.1     | 8.10 |
| K4D178    | SH3 domain-binding glutamic acid-rich protein<br>OS=Mus musculus<br>GN=Sh3bgr PE=4 SV=1 - [K4D178_MOUSE]                  | 19.23     | 5           | 2            | 2           | 3       | 2.869   | 0.250   | 0.054   | 0.048   | 6.69         | 19.23         | 3                         | 3     | 130      | 14.5     | 4.56 |
| Q3UKG2    | Protein Prob1 (Fragment)<br>OS=Mus musculus<br>GN=Prob1 PE=2 SV=1 - [Q3UKG2_MOUSE]                                        | 1.59      | 1           | 1            | 1           | 2       | 36.455  | 1.251   | 0.068   | 0.056   | 2.51         | 1.59          | 1                         | 2     | 1006     | 106.4    | 9.55 |
| Q810Y9    | PRAMEL6 OS=Mus musculus<br>GN=Pramel6 PE=2 SV=1 - [Q810Y9_MOUSE]                                                          | 5.98      | 1           | 2            | 2           | 2       | 3.163   | 0.352   | 0.085   | 0.062   | 4.96         | 5.98          | 2                         | 2     | 485      | 55.8     | 5.88 |
| A2CG22    | Butyrophilin-like 6<br>OS=Mus musculus<br>GN=Btl6 PE=4 SV=1 - [A2CG22_MOUSE]                                              | 2.23      | 1           | 1            | 1           | 1       | 3.535   | 0.252   | 0.071   | 0.063   | 2.51         | 2.23          | 1                         | 1     | 539      | 61.0     | 8.62 |
| E9Q2X6    | Structural maintenance of chromosomes protein<br>OS=Mus musculus<br>GN=Smc4 PE=2 SV=1 - [E9Q2X6_MOUSE]                    | 2.46      | 2           | 2            | 4           | 5       | 27.198  | 0.913   | 0.055   | 0.066   | 15.31        | 2.46          | 4                         | 5     | 1261     | 144.1    | 7.58 |
| E9Q4F3    | Thyrotropin subunit beta<br>OS=Mus musculus<br>GN=Tshb PE=3 SV=1 - [E9Q4F3_MOUSE]                                         | 7.97      | 2           | 1            | 1           | 4       | 0.260   | 0.164   | 0.058   | 0.071   | 15.37        | 7.97          | 2                         | 4     | 138      | 15.4     | 7.44 |
| Q8CDP0-4  | Isoform 4 of Cytosolic carboxypeptidase 3<br>OS=Mus musculus<br>GN=Agp3 - [CBPC3_MOUSE]                                   | 3.13      | 4           | 1            | 1           | 1       | 5.319   | 0.273   | 0.067   | 0.072   | 0.00         | 3.13          | 1                         | 1     | 511      | 59.3     | 7.27 |
| A2RTF1    | Cation channel sperm-associated protein subunit beta<br>OS=Mus musculus<br>GN=Catsperb PE=1 SV=1 - [CTSRB_MOUSE]          | 3.97      | 1           | 3            | 3           | 6       | 0.896   | 0.403   | 0.120   | 0.091   | 2.58         | 3.97          | 3                         | 6     | 1109     | 126.0    | 8.15 |
| Q3TML0    | Protein disulfide-isomerase A6<br>OS=Mus musculus<br>GN=Pdia6 PE=2 SV=1 - [Q3TML0_MOUSE]                                  | 40.22     | 1           | 1            | 15          | 66      | 0.748   | 0.040   | 0.620   | 0.096   | 201.23       | 40.22         | 24                        | 66    | 445      | 48.7     | 5.19 |
| Q64152    | Transcription factor BTF3<br>OS=Mus musculus<br>GN=Btf3 PE=2 SV=3 - [BTF3_MOUSE]                                          | 56.86     | 1           | 1            | 8           | 36      | 3.235   | 0.797   | 0.103   | 0.102   | 104.53       | 56.86         | 14                        | 36    | 204      | 22.0     | 9.52 |
| Q9CPQ0    | Prolactin OS=Mus musculus<br>GN=Prl PE=2 SV=2 - [O9CPQ0_MOUSE]                                                            | 24.00     | 3           | 6            | 6           | 34      | 0.569   | 0.448   | 0.118   | 0.104   | 83.55        | 24.00         | 10                        | 34    | 225      | 25.4     | 5.43 |
| P01193    | Pro-opiomelanocortin<br>OS=Mus musculus<br>GN=Pomc PE=2 SV=1 - [COLL_MOUSE]                                               | 53.62     | 1           | 13           | 13          | 150     | 0.701   | 0.552   | 0.093   | 0.107   | 330.88       | 53.62         | 20                        | 150   | 235      | 26.7     | 8.06 |
| A2AVN2    | Glycoprotein hormones alpha chain (Fragment)<br>OS=Mus musculus<br>GN=Cga PE=2 SV=1 - [A2AVN2_MOUSE]                      | 12.82     | 2           | 3            | 3           | 16      | 0.503   | 0.402   | 0.108   | 0.112   | 35.91        | 12.82         | 4                         | 16    | 117      | 13.2     | 8.47 |
| O88904-2  | Isoform 2 of Homeodomain-interacting protein kinase 1<br>OS=Mus musculus<br>GN=Hipk1 - [HIPK1_MOUSE]                      | 4.55      | 4           | 3            | 3           | 3       | 1.784   | 1.575   | 0.067   | 0.117   | 10.51        | 4.55          | 3                         | 3     | 1165     | 126.1    | 8.28 |
| P35455    | Vasopressin-neurophysin 2-copeptin OS=Mus musculus<br>GN=Avp PE=2 SV=1 - [NEU2_MOUSE]                                     | 72.02     | 1           | 7            | 9           | 109     | 1.218   | 1.200   | 0.080   | 0.118   | 257.14       | 72.02         | 17                        | 109   | 168      | 17.9     | 7.58 |
| P10637-4  | Isoform Tau-C of Microtubule-associated protein tau<br>OS=Mus musculus<br>GN=Mapt - [TAU_MOUSE]                           | 78.30     | 5           | 1            | 28          | 443     | 0.757   | 0.165   | 0.138   | 0.127   | 1210.77      | 78.30         | 50                        | 443   | 341      | 35.7     | 9.44 |
| Q7TQE7-2  | Isoform 2 of Uncharacterized protein KIAA0895<br>OS=Mus musculus<br>GN=Kiaa0895 - [K0895_MOUSE]                           | 10.55     | 2           | 2            | 2           | 2       | 18.512  | 5.102   | 0.375   | 0.158   | 2.93         | 10.55         | 2                         | 2     | 275      | 32.1     | 7.61 |
| F8VQD3    | Protein Vmn2r37 OS=Mus musculus<br>GN=Vmn2r37 PE=3 SV=1 - [F8VQD3_MOUSE]                                                  | 4.24      | 2           | 2            | 2           | 3       | 0.095   | 0.208   | 0.133   | 0.168   | 2.72         | 4.24          | 2                         | 3     | 802      | 92.1     | 7.96 |
| Q9DBZ1-2  | Isoform 2 of Inhibitor of nuclear factor kappa-B kinase-interacting protein<br>OS=Mus musculus<br>GN=Ikkip - [IKIP_MOUSE] | 5.51      | 1           | 2            | 2           | 5       | 0.841   | 0.491   | 0.165   | 0.182   | 13.56        | 5.51          | 3                         | 5     | 345      | 38.5     | 8.66 |

|          |                                                                                                                    |       |   |    |    |     |        |       |       |       |        |       |     |     |      |       |       |
|----------|--------------------------------------------------------------------------------------------------------------------|-------|---|----|----|-----|--------|-------|-------|-------|--------|-------|-----|-----|------|-------|-------|
| P28667   | MARCKS-related protein OS=Mus musculus GN=Marcks1 PE=1 SV=2 - [MRP_MOUSE]                                          | 6.50  | 1 | 2  | 2  | 8   | 0.669  | 0.172 | 0.238 | 0.182 | 17.43  | 6.50  | 3   | 8   | 200  | 20.2  | 4.61  |
| F8VPK5   | Rho-associated protein kinase 2 OS=Mus musculus GN=Rock2 PE=2 SV=1 - [F8VPK5_MOUSE]                                | 50.36 | 2 | 1  | 62 | 301 | 0.812  | 0.223 | 1.276 | 0.184 | 830.29 | 50.36 | 107 | 301 | 1388 | 160.5 | 5.99  |
| Q14BE7   | Family with sequence similarity 47, member A OS=Mus musculus GN=Fam47c PE=2 SV=1 - [Q14BE7_MOUSE]                  | 6.98  | 1 | 3  | 3  | 3   | 6.603  | 0.990 | 0.215 | 0.185 | 5.17   | 6.98  | 3   | 3   | 430  | 50.6  | 8.65  |
| P35454   | Oxytocin-neurophysin 1 OS=Mus musculus GN=Oxt PE=2 SV=1 - [NEU1_MOUSE]                                             | 50.40 | 1 | 2  | 4  | 57  | 1.090  | 1.511 | 0.160 | 0.186 | 157.06 | 50.40 | 7   | 57  | 125  | 12.8  | 5.44  |
| P29594   | Caspase-2 OS=Mus musculus GN=Casp2 PE=1 SV=5 - [CASP2_MOUSE]                                                       | 1.33  | 1 | 1  | 1  | 2   | 0.254  | 0.270 | 0.175 | 0.196 | 4.39   | 1.33  | 1   | 2   | 452  | 50.6  | 6.52  |
| Q8BML2   | Protein Oacyl OS=Mus musculus GN=Oacyl PE=2 SV=1 - [Q8BML2_MOUSE]                                                  | 1.75  | 1 | 1  | 1  | 2   | 0.786  | 0.982 | 0.286 | 0.207 | 6.30   | 1.75  | 2   | 2   | 685  | 76.5  | 8.02  |
| Q8CGN4-4 | isoform 4 of BCL-6 corepressor OS=Mus musculus GN=Bcor - [BCOR_MOUSE]                                              | 0.76  | 4 | 1  | 1  | 2   | 1.523  | 0.113 | 0.397 | 0.208 | 3.19   | 0.76  | 1   | 2   | 1707 | 186.6 | 6.87  |
| Q8BVR6   | RING finger and SPRY domain-containing protein 1 OS=Mus musculus GN=Rspry1 PE=2 SV=1 - [RSPRY_MOUSE]               | 8.16  | 3 | 4  | 4  | 4   | 1.624  | 0.680 | 0.370 | 0.210 | 11.42  | 8.16  | 4   | 4   | 576  | 64.3  | 5.50  |
| H3BLA9   | Sentrin-specific protease 6 (Fragment) OS=Mus musculus GN=Senp6 PE=2 SV=1 - [H3BLA9_MOUSE]                         | 3.43  | 1 | 1  | 1  | 3   | 0.303  | 0.204 | 0.197 | 0.232 | 6.09   | 3.43  | 2   | 3   | 204  | 23.5  | 5.85  |
| Q8BP71-5 | isoform 5 of RNA binding protein fox-1 homolog 2 OS=Mus musculus GN=Rbfox2 -                                       | 25.06 | 9 | 3  | 9  | 25  | 5.205  | 1.271 | 0.322 | 0.252 | 63.05  | 25.06 | 14  | 25  | 435  | 46.2  | 5.68  |
| D3Z3A9   | Reticulocalbin-3 (Fragment) OS=Mus musculus GN=Rcn3 PE=2 SV=1 - [D3Z3A9_MOUSE]                                     | 22.26 | 4 | 5  | 5  | 9   | 1.186  | 1.664 | 0.217 | 0.262 | 22.59  | 22.26 | 7   | 9   | 274  | 31.8  | 4.89  |
| Q7TSI0-2 | isoform 2 of Zinc finger protein 12 OS=Mus musculus GN=Znf12 - [ZNF12_MOUSE]                                       | 1.99  | 2 | 1  | 1  | 1   | 4.081  | 0.911 | 0.287 | 0.267 | 0.00   | 1.99  | 1   | 1   | 654  | 75.0  | 7.91  |
| Q04888   | Transcription factor SOX-10 OS=Mus musculus GN=Sox10 PE=2 SV=2 - [SOX10_MOUSE]                                     | 5.58  | 1 | 1  | 1  | 2   | 1.126  | 0.302 | 0.454 | 0.269 | 7.72   | 5.58  | 2   | 2   | 466  | 49.9  | 6.60  |
| Q3UHJ1   | TNF receptor-associated factor 3 OS=Mus musculus GN=Traf3 PE=2 SV=1 - [Q3UHJ1_MOUSE]                               | 40.04 | 4 | 1  | 23 | 87  | 1.205  | 1.962 | 0.451 | 0.279 | 261.56 | 40.04 | 36  | 87  | 542  | 61.5  | 8.03  |
| Q61941   | NAD(P) transhydrogenase, mitochondrial OS=Mus musculus GN=Nnt PE=1 SV=2 - [NNTM_MOUSE]                             | 25.41 | 4 | 28 | 28 | 107 | 0.593  | 1.088 | 0.327 | 0.282 | 286.58 | 25.41 | 51  | 107 | 1086 | 113.8 | 7.64  |
| P06880   | Somatotropin OS=Mus musculus GN=Gh1 PE=2 SV=1 - [SOMA_MOUSE]                                                       | 65.74 | 1 | 16 | 17 | 303 | 0.524  | 0.440 | 0.275 | 0.282 | 862.23 | 65.74 | 30  | 303 | 216  | 24.7  | 6.34  |
| P09813   | Apolipoprotein A-II OS=Mus musculus GN=Apoa2 PE=1 SV=2 - [APOA2_MOUSE]                                             | 18.63 | 1 | 2  | 2  | 10  | 3.448  | 0.451 | 0.317 | 0.291 | 26.46  | 18.63 | 4   | 10  | 102  | 11.3  | 7.18  |
| P51880   | Fatty acid-binding protein, brain OS=Mus musculus GN=Fabp7 PE=1 SV=2 - [FABP7_MOUSE]                               | 69.70 | 2 | 6  | 7  | 237 | 1.814  | 0.406 | 0.267 | 0.293 | 712.63 | 69.70 | 12  | 237 | 132  | 14.9  | 5.63  |
| B2RRL2   | Jerky protein homolog-like OS=Mus musculus GN=Jrkl PE=2 SV=1 - [JERKL_MOUSE]                                       | 2.29  | 1 | 1  | 1  | 1   | 14.228 | 0.999 | 0.487 | 0.294 | 2.10   | 2.29  | 1   | 1   | 523  | 59.7  | 7.91  |
| Q6GT24   | Peroxisomal protein 6 OS=Mus musculus GN=Prdx6 PE=2 SV=1 - [Q6GT24_MOUSE]                                          | 66.07 | 2 | 1  | 15 | 164 | 1.361  | 0.957 | 0.896 | 0.294 | 449.52 | 66.07 | 29  | 164 | 224  | 24.8  | 6.37  |
| Q8BGD6   | Putative sodium-coupled neutral amino acid transporter 9 OS=Mus musculus GN=Slc38a9 PE=1 SV=1 -                    | 4.46  | 1 | 2  | 2  | 5   | 4.947  | 0.814 | 0.398 | 0.298 | 19.43  | 4.46  | 3   | 5   | 560  | 63.4  | 7.50  |
| Q80VP5   | Probable peptide chain release factor C12orf65 homolog, mitochondrial OS=Mus musculus PE=1 SV=1 - [C12orf65_MOUSE] | 13.59 | 3 | 2  | 2  | 2   | 4.469  | 0.424 | 0.357 | 0.311 | 2.41   | 13.59 | 2   | 2   | 184  | 20.8  | 9.92  |
| Q80YN3   | Breast carcinoma-amplified sequence 1 homolog OS=Mus musculus GN=Bcas1 PE=1 SV=3 - [BCAS1_MOUSE]                   | 45.02 | 3 | 4  | 26 | 241 | 1.089  | 0.080 | 0.612 | 0.313 | 669.91 | 45.02 | 44  | 241 | 633  | 67.3  | 6.21  |
| P84228   | Histone H3.2 OS=Mus musculus GN=Hist1h3b PE=1 SV=2 - [H32_MOUSE]                                                   | 59.56 | 2 | 3  | 11 | 54  | 0.469  | 0.271 | 0.297 | 0.314 | 120.02 | 59.56 | 17  | 54  | 136  | 15.4  | 11.27 |
| P05622   | Platelet-derived growth factor receptor beta OS=Mus musculus GN=Pdgfrb PE=1 SV=1 - [PGFRB_MOUSE]                   | 9.93  | 9 | 9  | 10 | 28  | 2.084  | 0.922 | 0.316 | 0.314 | 74.60  | 9.93  | 15  | 28  | 1098 | 122.7 | 5.12  |

|          |                                                                                                                                    |       |   |    |    |     |        |       |       |       |        |       |    |     |      |       |       |
|----------|------------------------------------------------------------------------------------------------------------------------------------|-------|---|----|----|-----|--------|-------|-------|-------|--------|-------|----|-----|------|-------|-------|
| P97792   | Coxsackievirus and adenovirus receptor homolog OS=Mus musculus GN=Cxadr PE=1 SV=1 - [CXAR_MOUSE]                                   | 26.03 | 3 | 9  | 9  | 30  | 0.616  | 0.687 | 0.403 | 0.317 | 75.82  | 26.03 | 17 | 30  | 365  | 39.9  | 6.96  |
| G3XA11   | Cornichon homolog 3 (Drosophila), isoform CRA_a OS=Mus musculus GN=Cnih3 PE=4 SV=1 - [G3XA11_MOUSE]                                | 10.71 | 3 | 1  | 1  | 4   | 2.215  | 1.351 | 0.368 | 0.321 | 17.10  | 10.71 | 2  | 4   | 112  | 13.2  | 7.31  |
| Q4V9V3   | Elongation of very long chain fatty acids (FEN1/Elo2, SUR4/Elo3, yeast)-like 1 OS=Mus musculus GN=Elov1 PE=2 SV=1 - [Q4V9V3_MOUSE] | 5.94  | 2 | 1  | 1  | 8   | 0.580  | 0.140 | 0.231 | 0.324 | 13.66  | 5.94  | 2  | 8   | 202  | 23.7  | 9.76  |
| Q9D6E4   | Tetratricopeptide repeat protein 9B OS=Mus musculus GN=Ttc9b PE=2 SV=1 - [TTC9B_MOUSE]                                             | 39.75 | 1 | 5  | 7  | 16  | 0.873  | 1.493 | 0.748 | 0.326 | 43.84  | 39.75 | 12 | 16  | 239  | 25.9  | 9.48  |
| Q19LJ2   | Alpha-1B-glycoprotein OS=Mus musculus GN=A1bg PE=1 SV=1 - [A1BG_MOUSE]                                                             | 8.79  | 1 | 4  | 4  | 5   | 0.873  | 0.334 | 0.300 | 0.334 | 12.95  | 8.79  | 5  | 5   | 512  | 56.5  | 6.79  |
| D3Z7S5   | Transmembrane protein 208 OS=Mus musculus GN=Tmem208 PE=2 SV=1 - [D3Z7S5_MOUSE]                                                    | 6.36  | 3 | 1  | 1  | 1   | 0.739  | 1.119 | 0.401 | 0.340 | 2.46   | 6.36  | 1  | 1   | 110  | 12.1  | 7.12  |
| A2AMG5   | Nibrin (Fragment) OS=Mus musculus GN=Nbn PE=2 SV=1 - [A2AMG5_MOUSE]                                                                | 2.92  | 2 | 1  | 1  | 1   | 0.695  | 0.415 | 0.749 | 0.341 | 4.31   | 2.92  | 1  | 1   | 548  | 60.5  | 7.28  |
| Q8VIG1   | RE1-silencing transcription factor OS=Mus musculus GN=Rest PE=2 SV=2 - [REST_MOUSE]                                                | 1.76  | 1 | 1  | 2  | 2   | 70.853 | 4.067 | 1.022 | 0.351 | 5.07   | 1.76  | 2  | 2   | 1082 | 117.7 | 6.65  |
| E9PWG6   | Protein Ncapg OS=Mus musculus GN=Ncapg PE=4 SV=1 - [E9PWG6_MOUSE]                                                                  | 1.49  | 1 | 1  | 1  | 1   | 4.024  | 4.058 | 1.584 | 0.351 | 2.19   | 1.49  | 1  | 1   | 1004 | 112.8 | 5.55  |
| F6TQW2   | Protein Ighg2c OS=Mus musculus GN=Ighg2c PE=4 SV=1 - [F6TQW2_MOUSE]                                                                | 10.42 | 2 | 2  | 4  | 8   | 1.935  | 0.760 | 0.770 | 0.353 | 24.77  | 10.42 | 5  | 8   | 403  | 44.1  | 6.90  |
| Q3ULB5   | Serine/threonine-protein kinase PAK 6 OS=Mus musculus GN=Pak6 PE=2 SV=1 - [PAK6_MOUSE]                                             | 7.62  | 1 | 2  | 3  | 8   | 1.700  | 1.612 | 1.013 | 0.353 | 13.17  | 7.62  | 5  | 8   | 682  | 74.8  | 9.44  |
| P16014   | Secretogranin-1 OS=Mus musculus GN=Chgb PE=1 SV=2 - [SCG1_MOUSE]                                                                   | 31.31 | 1 | 20 | 20 | 99  | 1.144  | 0.805 | 0.519 | 0.356 | 302.09 | 31.31 | 38 | 99  | 677  | 77.9  | 5.07  |
| G3UZJ2   | Microtubule-associated protein (Fragment) OS=Mus musculus GN=Map2 PE=2 SV=1 - [G3UZJ2_MOUSE]                                       | 71.78 | 1 | 2  | 22 | 183 | 0.991  | 0.542 | 0.415 | 0.363 | 549.97 | 71.78 | 38 | 183 | 241  | 25.7  | 11.09 |
| Q8CGT2   | Baculoviral IAP repeat-containing protein 1e OS=Mus musculus GN=Naip5 PE=2 SV=1 - [Q8CGT2_MOUSE]                                   | 2.21  | 2 | 2  | 2  | 2   | 18.228 | 2.803 | 0.824 | 0.368 | 2.96   | 2.21  | 2  | 2   | 1403 | 159.7 | 5.87  |
| Q9Z0F1-2 | Isoform Nesp55-2 of Neuroendocrine secretory protein 55 OS=Mus musculus GN=Gnas - [GNAS3_MOUSE]                                    | 7.91  | 2 | 2  | 2  | 7   | 1.175  | 0.446 | 0.301 | 0.372 | 14.20  | 7.91  | 4  | 7   | 253  | 28.9  | 5.05  |
| Q9ER41   | Torsin-1B OS=Mus musculus GN=Tor1b PE=2 SV=2 - [TOR1B_MOUSE]                                                                       | 10.12 | 4 | 2  | 2  | 3   | 2.055  | 0.464 | 0.600 | 0.372 | 5.66   | 10.12 | 3  | 3   | 336  | 37.8  | 8.02  |
| P26339   | Chromogranin-A OS=Mus musculus GN=Chga PE=1 SV=1 - [CMGA_MOUSE]                                                                    | 13.61 | 1 | 5  | 5  | 28  | 1.522  | 0.627 | 0.465 | 0.379 | 77.66  | 13.61 | 8  | 28  | 463  | 51.8  | 4.72  |
| Q64676   | 2-hydroxyacylsphingosine 1-beta-galactosyltransferase OS=Mus musculus GN=Ugt8 PE=2 SV=2 - [UGT8_MOUSE]                             | 24.77 | 1 | 15 | 15 | 37  | 0.883  | 0.131 | 0.291 | 0.380 | 94.12  | 24.77 | 24 | 37  | 541  | 61.2  | 9.42  |
| Q6NS86   | Protein Zfp366 OS=Mus musculus GN=Zfp366 PE=2 SV=1 - [Q6NS86_MOUSE]                                                                | 1.47  | 1 | 1  | 1  | 1   | 0.770  | 0.579 | 0.516 | 0.386 | 0.00   | 1.47  | 1  | 1   | 746  | 84.8  | 7.97  |
| Q497J1   | Lysoplasmalogenase OS=Mus musculus GN=Tmem86b PE=2 SV=1 - [TM86B_MOUSE]                                                            | 8.85  | 1 | 1  | 1  | 1   | 5.906  | 1.152 | 0.358 | 0.390 | 2.70   | 8.85  | 1  | 1   | 226  | 25.0  | 6.73  |
| P30681   | High mobility group protein B2 OS=Mus musculus GN=Hingb2 PE=1 SV=3 - [HINGB2_MOUSE]                                                | 24.76 | 1 | 5  | 6  | 16  | 0.720  | 0.485 | 0.502 | 0.390 | 39.28  | 24.76 | 10 | 16  | 210  | 24.1  | 7.31  |
| G5E8I7   | Ubiquitin carboxyl-terminal hydrolase OS=Mus musculus GN=Usp17c PE=3 SV=1 - [G5E8I7_MOUSE]                                         | 2.75  | 1 | 1  | 1  | 2   | 0.485  | 0.264 | 0.343 | 0.392 | 2.21   | 2.75  | 1  | 2   | 545  | 61.4  | 7.53  |
| Q8VI24-2 | Isoform 2 of DNA-binding protein SATB2 OS=Mus musculus GN=Satb2 - [SATB2_MOUSE]                                                    | 2.97  | 3 | 2  | 2  | 2   | 1.063  | 1.887 | 0.401 | 0.394 | 5.31   | 2.97  | 2  | 2   | 674  | 76.0  | 7.50  |
| H3BJH0   | Low-density lipoprotein receptor-related protein 5 OS=Mus musculus GN=Lrp5 PE=2 SV=1 - [H3BJH0_MOUSE]                              | 3.94  | 3 | 1  | 1  | 1   | 4.623  | 1.342 | 0.327 | 0.396 | 2.18   | 3.94  | 1  | 1   | 279  | 30.9  | 6.92  |

|          |                                                                                                                                  |       |   |   |    |    |        |       |       |       |        |       |    |    |      |       |      |
|----------|----------------------------------------------------------------------------------------------------------------------------------|-------|---|---|----|----|--------|-------|-------|-------|--------|-------|----|----|------|-------|------|
| Q8BX10-2 | Isoform 2 of Serine/threonine-protein phosphatase PGAM5, mitochondrial OS=Mus musculus GN=Pgam5 - [PAM5_MOUSE]                   | 47.74 | 3 | 1 | 14 | 45 | 1.220  | 0.686 | 0.534 | 0.397 | 103.38 | 47.74 | 24 | 45 | 287  | 31.8  | 9.04 |
| Q9JJF0   | Nucleosome assembly protein 1-like 5 OS=Mus musculus GN=Nap115 PE=2 SV=1 -                                                       | 21.79 | 1 | 5 | 5  | 28 | 0.592  | 0.292 | 0.377 | 0.398 | 61.56  | 21.79 | 10 | 28 | 156  | 17.0  | 4.32 |
| Q04886   | Transcription factor SOX-8 OS=Mus musculus GN=Sox8 PE=2 SV=2 - [SOX8_MOUSE]                                                      | 15.52 | 2 | 3 | 3  | 6  | 1.249  | 0.527 | 0.970 | 0.401 | 16.60  | 15.52 | 4  | 6  | 464  | 49.8  | 7.15 |
| F7C9E8   | Uncharacterized protein OS=Mus musculus GN=Gm5501 PE=4 SV=1 - [F7C9E8_MOUSE]                                                     | 4.53  | 1 | 1 | 1  | 1  | 2.298  | 0.733 | 0.349 | 0.401 | 2.57   | 4.53  | 1  | 1  | 287  | 31.7  | 8.19 |
| Q9CXL6   | Doublecortin, isoform CRA_b OS=Mus musculus GN=Dcx PE=2 SV=1 - [Q9CXL6_MOUSE]                                                    | 30.56 | 3 | 7 | 11 | 44 | 0.594  | 0.542 | 0.609 | 0.401 | 115.12 | 30.56 | 18 | 44 | 360  | 40.0  | 9.39 |
| Q6NS65   | Uracil nucleotide/cysteinyl leukotriene receptor OS=Mus musculus GN=Gpr17 PE=2 SV=1 - [GPR17_MOUSE]                              | 5.31  | 1 | 2 | 2  | 5  | 0.868  | 0.597 | 0.479 | 0.401 | 14.46  | 5.31  | 4  | 5  | 339  | 37.8  | 8.72 |
| Q4QLR3   | Coiled-coil domain-containing protein 88B OS=Mus musculus GN=Ccdc88b PE=1 SV=2 - [CC88B_MOUSE]                                   | 3.04  | 2 | 2 | 3  | 3  | 1.330  | 0.288 | 0.279 | 0.412 | 8.00   | 3.04  | 3  | 3  | 1481 | 166.5 | 5.33 |
| E9PYP8   | Beta-crystallin B1 (Fragment) OS=Mus musculus GN=Crybb1 PE=2 SV=1 -                                                              | 16.95 | 2 | 3 | 3  | 9  | 0.856  | 0.574 | 0.580 | 0.415 | 28.76  | 16.95 | 5  | 9  | 236  | 26.5  | 7.88 |
| Q7T575   | APC membrane recruitment protein 1 OS=Mus musculus GN=Amer1 PE=2 SV=3 -                                                          | 1.68  | 1 | 1 | 1  | 1  | 24.277 | 0.948 | 0.491 | 0.416 | 3.65   | 1.68  | 1  | 1  | 1132 | 124.1 | 4.68 |
| Q8CGC4   | Protein LSM14 homolog B OS=Mus musculus GN=Lsm14b PE=2 SV=3 - [LS14B_MOUSE]                                                      | 18.18 | 1 | 1 | 6  | 15 | 1.718  | 0.833 | 0.579 | 0.419 | 38.25  | 18.18 | 9  | 15 | 385  | 42.3  | 9.63 |
| Q9CY02   | Alpha-hemoglobin-stabilizing protein OS=Mus musculus GN=Ahsp PE=2 SV=1 - [AHSP_MOUSE]                                            | 7.84  | 1 | 1 | 1  | 2  | 4.220  | 1.422 | 0.366 | 0.425 | 5.62   | 7.84  | 2  | 2  | 102  | 11.8  | 4.74 |
| E9Q0M2   | Membrane-associated guanylate kinase, WW and PDZ domain-containing protein 2 OS=Mus musculus GN=Magi2 PE=4 SV=1 - [E9Q0M2_MOUSE] | 14.73 | 1 | 1 | 1  | 2  | 2.371  | 2.907 | 0.678 | 0.429 | 0.00   | 14.73 | 1  | 2  | 129  | 14.5  | 7.05 |
| Q61603   | Glycine receptor subunit alpha-4 OS=Mus musculus GN=Gir4 PE=2 SV=3 - [GLRA4_MOUSE]                                               | 4.39  | 1 | 1 | 2  | 3  | 14.349 | 6.330 | 1.152 | 0.429 | 8.27   | 4.39  | 3  | 3  | 456  | 52.5  | 8.44 |
| Q9D9X8-2 | Isoform 2 of Sperm acrosome membrane-associated protein 3 OS=Mus musculus GN=Spaca3 - [SPACA3_MOUSE]                             | 32.52 | 2 | 2 | 2  | 4  | 1.222  | 0.440 | 0.478 | 0.430 | 1.79   | 32.52 | 2  | 4  | 163  | 18.4  | 6.86 |
| F7B6A4   | Protein Kctd17 (Fragment) OS=Mus musculus GN=Kctd17 PE=2 SV=1 - [F7B6A4_MOUSE]                                                   | 10.19 | 5 | 1 | 1  | 1  | 0.840  | 0.585 | 0.916 | 0.430 | 3.03   | 10.19 | 1  | 1  | 206  | 23.6  | 4.63 |
| D3YUR6   | Transmembrane protein 169 (Fragment) OS=Mus musculus GN=Tmem169 PE=2 SV=1 - [D3YUR6_MOUSE]                                       | 21.67 | 2 | 2 | 2  | 3  | 0.614  | 0.403 | 0.682 | 0.442 | 10.52  | 21.67 | 3  | 3  | 120  | 13.4  | 5.02 |
| A2AWR2   | GPR155 variant 5 OS=Mus musculus GN=Gpr155 PE=2 SV=1 - [A2AWR2_MOUSE]                                                            | 1.55  | 2 | 1 | 1  | 3  | 2.574  | 0.817 | 0.528 | 0.444 | 5.45   | 1.55  | 2  | 3  | 840  | 93.1  | 6.52 |
| Q61500   | Integral membrane protein 2A OS=Mus musculus GN=Itim2a PE=2 SV=2 - [ITM2A_MOUSE]                                                 | 4.18  | 1 | 1 | 1  | 5  | 1.000  | 0.938 | 0.466 | 0.446 | 13.24  | 4.18  | 2  | 5  | 263  | 29.7  | 5.72 |
| H3BK32   | Sentrin-specific protease 6 (Fragment) OS=Mus musculus GN=Senp6 PE=2 SV=1 - [H3BK32_MOUSE]                                       | 2.62  | 5 | 2 | 2  | 3  | 4.459  | 1.281 | 0.815 | 0.446 | 5.88   | 2.62  | 2  | 3  | 917  | 103.6 | 6.37 |
| E9Q4D5   | GTP-binding protein REM 2 OS=Mus musculus GN=Rem2 PE=2 SV=1 - [E9Q4D5_MOUSE]                                                     | 12.90 | 5 | 3 | 3  | 5  | 0.844  | 0.304 | 2.572 | 0.447 | 19.82  | 12.90 | 5  | 5  | 341  | 37.4  | 7.39 |
| Q8K4K3   | Tribbles homolog 2 OS=Mus musculus GN=Trib2 PE=2 SV=2 - [TRIB2_MOUSE]                                                            | 3.50  | 1 | 1 | 1  | 2  | 4.391  | 1.447 | 0.910 | 0.448 | 2.39   | 3.50  | 1  | 2  | 343  | 38.7  | 6.15 |
| E9Q8Z7   | Mirror-image polyductly gene 1 protein homolog OS=Mus musculus GN=Mipol1 PE=2 SV=1 - [E9Q8Z7_MOUSE]                              | 10.03 | 5 | 2 | 4  | 5  | 1.356  | 0.968 | 1.035 | 0.454 | 11.28  | 10.03 | 5  | 5  | 379  | 43.5  | 5.43 |
| Q80VW5-2 | Isoform 2 of Whirlin OS=Mus musculus GN=Dfnb31 - [WHRN_MOUSE]                                                                    | 5.38  | 8 | 4 | 4  | 5  | 3.034  | 0.680 | 0.452 | 0.455 | 17.79  | 5.38  | 5  | 5  | 911  | 97.0  | 8.70 |
| Q9QWK5   | Baculoviral IAP repeat-containing protein 1a OS=Mus musculus GN=Naip1 PE=2 SV=3 - [BIR1A_MOUSE]                                  | 1.85  | 3 | 2 | 2  | 4  | 2.012  | 1.380 | 0.523 | 0.459 | 2.89   | 1.85  | 2  | 4  | 1403 | 158.6 | 6.30 |

|          |                                                                                                                                                                                          |       |    |    |    |      |       |       |       |       |          |       |    |      |     |      |       |
|----------|------------------------------------------------------------------------------------------------------------------------------------------------------------------------------------------|-------|----|----|----|------|-------|-------|-------|-------|----------|-------|----|------|-----|------|-------|
| Q8K094   | Poliovirus receptor<br>OS=Mus musculus GN=Pvr<br>PE=2 SV=1 -<br>[Q8K094_MOUSE]                                                                                                           | 9.80  | 1  | 2  | 2  | 4    | 1.524 | 0.845 | 0.546 | 0.460 | 10.73    | 9.80  | 3  | 4    | 408 | 44.6 | 8.06  |
| P28651   | Carbonic anhydrase-<br>related protein OS=Mus<br>musculus GN=Ca8 PE=1<br>SV=5 - [CAH8_MOUSE]                                                                                             | 20.96 | 1  | 5  | 5  | 18   | 1.135 | 0.783 | 1.425 | 0.460 | 42.57    | 20.96 | 8  | 18   | 291 | 33.1 | 4.78  |
| Q9CX53   | Gem-associated protein 6<br>OS=Mus musculus<br>GN=Gemin6 PE=2 SV=2 -<br>[GEM6_MOUSE]                                                                                                     | 7.83  | 1  | 1  | 1  | 6    | 3.834 | 0.903 | 0.449 | 0.460 | 10.93    | 7.83  | 2  | 6    | 166 | 18.7 | 5.25  |
| O35887   | Calumenin OS=Mus<br>musculus GN=Calu PE=1<br>SV=1 - [CALU_MOUSE]                                                                                                                         | 64.13 | 7  | 3  | 16 | 78   | 1.229 | 0.652 | 1.000 | 0.462 | 242.01   | 64.13 | 26 | 78   | 315 | 37.0 | 4.67  |
| Q3TTY5   | Keratin, type II<br>cytoskeletal 2 epidermal<br>OS=Mus musculus<br>GN=Krt2 PE=1 SV=1 -<br>[K22E_MOUSE]                                                                                   | 10.47 | 1  | 4  | 6  | 26   | 5.182 | 0.804 | 0.674 | 0.468 | 54.43    | 10.47 | 9  | 26   | 707 | 70.9 | 8.06  |
| P97378   | Interleukin-12 receptor<br>subunit beta-2 OS=Mus<br>musculus GN=Il12rb2<br>PE=1 SV=1 -<br>[I12R2_MOUSE]                                                                                  | 3.20  | 2  | 2  | 2  | 3    | 2.999 | 1.099 | 0.379 | 0.470 | 3.31     | 3.20  | 3  | 3    | 874 | 98.1 | 7.81  |
| P19324   | Serpin H1 OS=Mus<br>musculus GN=Serpinh1<br>PE=1 SV=3 -<br>[SERPH_MOUSE]                                                                                                                 | 37.65 | 1  | 15 | 15 | 45   | 0.690 | 0.792 | 0.360 | 0.470 | 171.60   | 37.65 | 29 | 45   | 417 | 46.5 | 8.82  |
| Q9D6G9-2 | Isoform 2 of CKLF-like<br>MARVEL transmembrane<br>domain-containing protein<br>5 OS=Mus musculus<br>GN=Cntn5<br>( <i>ctn5</i> ) OS=Mus musculus<br>GN=Klk14 PE=2<br>SV=1 - [Klk14_MOUSE] | 17.59 | 2  | 1  | 1  | 2    | 1.106 | 0.405 | 1.193 | 0.471 | 7.10     | 17.59 | 1  | 2    | 108 | 11.8 | 4.77  |
| Q8CGR5   | Kallikrein-14 OS=Mus<br>musculus GN=Klk14 PE=2<br>SV=1 - [Klk14_MOUSE]                                                                                                                   | 8.00  | 1  | 1  | 1  | 1    | 2.015 | 1.532 | 0.471 | 0.473 | 3.21     | 8.00  | 1  | 1    | 250 | 27.0 | 9.09  |
| Q655C2   | N-acetylglucosamine-1-<br>phosphotransferase<br>subunit gamma OS=Mus<br>musculus GN=Gnptg PE=2<br>SV=1 - [GNPTG_MOUSE]                                                                   | 10.42 | 2  | 2  | 2  | 4    | 1.511 | 0.925 | 0.403 | 0.473 | 11.32    | 10.42 | 4  | 4    | 307 | 34.1 | 6.92  |
| D3Z6X8   | Protein orai-3 OS=Mus<br>musculus GN=Orai3 PE=2<br>SV=1 - [D3Z6X8_MOUSE]                                                                                                                 | 19.12 | 1  | 1  | 1  | 2    | 3.800 | 1.796 | 1.209 | 0.474 | 5.18     | 19.12 | 1  | 2    | 136 | 14.5 | 8.21  |
| F8VQ01   | Protein Olfr66 OS=Mus<br>musculus GN=Olfr66 PE=3<br>SV=1 - [F8VQ01_MOUSE]                                                                                                                | 10.29 | 1  | 1  | 1  | 2    | 2.026 | 1.073 | 0.347 | 0.475 | 0.00     | 10.29 | 1  | 2    | 311 | 35.3 | 8.53  |
| G3X8T9   | Serine (Or cysteine)<br>peptidase inhibitor, clade<br>A, member 3N, isoform<br>CRA_a OS=Mus musculus<br>GN=Serpina3n PE=3 SV=1<br>- [G3X8T9_MOUSE]                                       | 37.32 | 1  | 1  | 14 | 59   | 8.671 | 3.473 | 7.027 | 0.475 | 162.42   | 37.32 | 24 | 59   | 418 | 46.7 | 5.82  |
| P43275   | Histone H1.1 OS=Mus<br>musculus GN=Hist1h1a<br>PE=1 SV=2 -<br>[H11_MOUSE]                                                                                                                | 28.64 | 1  | 4  | 7  | 36   | 0.612 | 0.777 | 0.575 | 0.475 | 99.19    | 28.64 | 13 | 36   | 213 | 21.8 | 10.93 |
| Q9CQP0   | 39S ribosomal protein L33,<br>mitochondrial OS=Mus<br>musculus GN=Mp133<br>PE=2 SV=1 -<br>[RM33_MOUSE]                                                                                   | 18.46 | 1  | 1  | 1  | 2    | 1.439 | 0.458 | 0.628 | 0.480 | 3.56     | 18.46 | 2  | 2    | 65  | 7.4  | 10.89 |
| Q60605-2 | Isoform Smooth muscle of<br>Myosin light polypeptide 6<br>OS=Mus musculus<br>GN=My16 -<br>[MYL6_MOUSE]                                                                                   | 80.13 | 1  | 1  | 10 | 150  | 1.809 | 1.244 | 1.236 | 0.480 | 400.13   | 80.13 | 18 | 150  | 151 | 17.0 | 4.55  |
| Q9CWF2   | Tubulin beta-2B chain<br>OS=Mus musculus<br>GN=Tubb2b PE=1 SV=1 -<br>[TBB2B_MOUSE]                                                                                                       | 83.82 | 2  | 2  | 33 | 4745 | 0.606 | 0.493 | 0.417 | 0.485 | 12689.53 | 83.82 | 61 | 4745 | 445 | 49.9 | 4.89  |
| Q9QY93   | dCTP pyrophosphatase 1<br>OS=Mus musculus<br>GN=Dctpp1 PE=1 SV=1 -<br>[DCTP1_MOUSE]                                                                                                      | 17.65 | 1  | 2  | 2  | 4    | 1.578 | 0.748 | 1.018 | 0.486 | 9.80     | 17.65 | 4  | 4    | 170 | 18.8 | 5.03  |
| Q8R4E6   | Purine-rich element-<br>binding protein gamma<br>OS=Mus musculus<br>GN=Purg PE=1 SV=1 -<br>[PURG_MOUSE]                                                                                  | 27.71 | 2  | 9  | 13 | 33   | 0.442 | 0.342 | 0.586 | 0.486 | 94.85    | 27.71 | 19 | 33   | 350 | 39.9 | 9.51  |
| P97363   | Serine palmitoyltransferase<br>2 OS=Mus musculus<br>GN=Sptc2 PE=2 SV=2 -<br>[SPTC2_MOUSE]                                                                                                | 11.07 | 1  | 5  | 5  | 7    | 0.694 | 0.486 | 0.471 | 0.486 | 18.27    | 11.07 | 7  | 7    | 560 | 62.9 | 8.18  |
| Q9R210   | Transcription factor EB<br>OS=Mus musculus<br>GN=Tfeb PE=1 SV=2 -<br>[TFEB_MOUSE]                                                                                                        | 7.37  | 13 | 2  | 5  | 6    | 2.079 | 0.431 | 0.739 | 0.487 | 15.67    | 7.37  | 6  | 6    | 475 | 52.6 | 6.29  |
| Q3V188   | Poly(U)-specific<br>endoribonuclease OS=Mus<br>musculus GN=Endou PE=2<br>SV=1 - [ENDOU_MOUSE]                                                                                            | 5.83  | 2  | 2  | 2  | 6    | 0.692 | 0.508 | 0.722 | 0.487 | 18.75    | 5.83  | 3  | 6    | 412 | 47.0 | 5.30  |
| Q8R0K2   | E3 ubiquitin-protein ligase<br>TRIM31 OS=Mus musculus<br>GN=Trim31 PE=1 SV=1 -<br>[TRIM31_MOUSE]                                                                                         | 7.10  | 1  | 2  | 3  | 4    | 1.611 | 0.778 | 0.457 | 0.491 | 5.64     | 7.10  | 3  | 4    | 507 | 57.1 | 7.85  |
| Q8CEG5   | Coiled-coil domain-<br>containing protein 28B<br>OS=Mus musculus<br>GN=Ccdc28b PE=2 SV=3 -<br>[CC28B_MOUSE]                                                                              | 20.50 | 4  | 3  | 3  | 7    | 0.532 | 0.321 | 0.907 | 0.492 | 23.30    | 20.50 | 5  | 7    | 200 | 22.0 | 5.36  |
| Q91XZ5   | Protein Pcdhb5 OS=Mus<br>musculus GN=Pcdhb5<br>PE=2 SV=1 -<br>[Q91XZ5_MOUSE]                                                                                                             | 2.15  | 1  | 1  | 1  | 1    | 2.690 | 0.985 | 0.533 | 0.493 | 2.65     | 2.15  | 1  | 1    | 792 | 87.2 | 4.94  |

|          |                                                                                                                |       |    |    |    |     |       |       |       |       |        |       |     |     |      |       |       |
|----------|----------------------------------------------------------------------------------------------------------------|-------|----|----|----|-----|-------|-------|-------|-------|--------|-------|-----|-----|------|-------|-------|
| Q61166   | Microtubule-associated protein RP/EB family member 1 OS=Mus musculus GN=Mapre1 PE=1 SV=3 - [MAPRE1_MOUSE]      | 42.54 | 1  | 7  | 11 | 88  | 0.932 | 0.678 | 0.612 | 0.498 | 260.07 | 42.54 | 21  | 88  | 268  | 30.0  | 5.22  |
| Q9EPR2-2 | Isoform 2 of Group XIIA secretory phospholipase A2 OS=Mus musculus GN=Pla2g12a - [PG12A_MOUSE]                 | 8.50  | 2  | 1  | 1  | 1   | 3.423 | 1.769 | 0.589 | 0.500 | 3.51   | 8.50  | 1   | 1   | 153  | 17.2  | 6.49  |
| Q9JIP4   | Pannexin-1 OS=Mus musculus GN=Panx1 PE=1 SV=3 - [PANX1_MOUSE]                                                  | 5.87  | 1  | 1  | 1  | 3   | 1.054 | 0.820 | 0.464 | 0.500 | 13.53  | 5.87  | 2   | 3   | 426  | 48.1  | 7.03  |
| Q8BPB5   | EGF-containing fibulin-like extracellular matrix protein 1 OS=Mus musculus GN=Etemp1 PE=2 SV=1 - [FBLN3_MOUSE] | 12.98 | 1  | 4  | 4  | 16  | 0.856 | 1.861 | 0.431 | 0.500 | 33.41  | 12.98 | 6   | 16  | 493  | 54.9  | 5.14  |
| Q80YX1   | Tenascin OS=Mus musculus GN=Tnc PE=1 SV=1 - [TENA_MOUSE]                                                       | 26.73 | 6  | 45 | 45 | 127 | 0.772 | 0.809 | 0.700 | 0.505 | 360.99 | 26.73 | 78  | 127 | 2110 | 231.7 | 4.89  |
| B1AU75   | Nuclear autoantigenic sperm protein OS=Mus musculus GN=Nasp PE=4 SV=1 - [B1AU75_MOUSE]                         | 16.56 | 4  | 9  | 10 | 21  | 1.945 | 0.705 | 0.707 | 0.506 | 60.38  | 16.56 | 14  | 21  | 773  | 84.0  | 4.37  |
| P02469   | Laminin subunit beta-1 OS=Mus musculus GN=Lamb1 PE=1 SV=3 - [LAMB1_MOUSE]                                      | 13.10 | 3  | 19 | 21 | 46  | 1.091 | 0.606 | 0.483 | 0.508 | 128.21 | 13.10 | 33  | 46  | 1786 | 197.0 | 4.94  |
| D3Y269   | Microtubule-associated tumor suppressor candidate 2 homolog OS=Mus musculus GN=Mus2 PE=2 SV=1 - [MUS2_MOUSE]   | 33.65 | 4  | 1  | 10 | 22  | 1.114 | 1.481 | 0.874 | 0.510 | 42.22  | 33.65 | 15  | 22  | 315  | 36.9  | 5.44  |
| Q8BHT6   | Beta-1,3-glucosyltransferase OS=Mus musculus GN=B3galti PE=2 SV=3 - [B3GALT_MOUSE]                             | 13.09 | 2  | 3  | 5  | 15  | 0.762 | 1.038 | 0.871 | 0.512 | 27.99  | 13.09 | 8   | 15  | 489  | 55.3  | 6.92  |
| O08664   | B-cell CLL/lymphoma 7 protein family member C OS=Mus musculus GN=Bcl7c PE=1 SV=1 - [BCL7C_MOUSE]               | 5.53  | 1  | 1  | 1  | 2   | 1.254 | 1.023 | 0.371 | 0.513 | 3.45   | 5.53  | 2   | 2   | 217  | 23.4  | 5.20  |
| D3Z689   | Mitochondrial 10-formyltetrahydrofolate dehydrogenase OS=Mus musculus GN=Aldh1l2 PE=2 SV=1 - [D3Z689_MOUSE]    | 32.35 | 2  | 15 | 23 | 73  | 0.880 | 0.436 | 0.382 | 0.516 | 203.53 | 32.35 | 40  | 73  | 810  | 88.8  | 5.58  |
| Q9D115   | Zinc finger protein 706 OS=Mus musculus GN=Znf706 PE=2 SV=1 - [ZNF706_MOUSE]                                   | 25.00 | 1  | 2  | 2  | 3   | 1.288 | 0.550 | 0.851 | 0.520 | 4.88   | 25.00 | 2   | 3   | 76   | 8.5   | 10.01 |
| P70677   | Caspase-3 OS=Mus musculus GN=Casp3 PE=1 SV=1 - [CASP3_MOUSE]                                                   | 25.63 | 1  | 7  | 7  | 18  | 1.453 | 0.888 | 0.571 | 0.521 | 42.71  | 25.63 | 12  | 18  | 277  | 31.5  | 6.92  |
| P47955   | 60S acidic ribosomal protein P1 OS=Mus musculus GN=Rplp1 PE=1 SV=1 - [RPL1_MOUSE]                              | 57.02 | 3  | 3  | 3  | 9   | 1.153 | 0.877 | 0.755 | 0.521 | 19.27  | 57.02 | 4   | 9   | 114  | 11.5  | 4.32  |
| Q8CHK4-3 | Isoform 3 of Histone acetyltransferase KAT5 OS=Mus musculus GN=kat5 - [KATS_MOUSE]                             | 5.49  | 4  | 2  | 2  | 2   | 3.496 | 0.228 | 0.961 | 0.524 | 6.07   | 5.49  | 2   | 2   | 546  | 61.8  | 8.57  |
| O88566   | Axin-2 OS=Mus musculus GN=Axin2 PE=1 SV=2 - [AXIN2_MOUSE]                                                      | 2.14  | 2  | 2  | 2  | 2   | 0.857 | 0.671 | 0.624 | 0.525 | 4.56   | 2.14  | 2   | 2   | 840  | 92.8  | 7.75  |
| Q9D7E4   | UPF0449 protein C19orf25 homolog OS=Mus musculus PE=1 SV=1 - [CS025_MOUSE]                                     | 51.38 | 1  | 3  | 3  | 8   | 2.166 | 1.037 | 1.578 | 0.532 | 18.11  | 51.38 | 5   | 8   | 109  | 12.1  | 5.25  |
| P43025   | Tetranectin OS=Mus musculus GN=Clec3b PE=1 SV=2 - [TETN_MOUSE]                                                 | 26.73 | 2  | 3  | 3  | 3   | 2.198 | 0.996 | 0.994 | 0.534 | 12.40  | 26.73 | 3   | 3   | 202  | 22.2  | 5.66  |
| Q99PL5   | Ribosome-binding protein 1 OS=Mus musculus GN=Rrbp1 PE=2 SV=2 - [RRBP1_MOUSE]                                  | 54.39 | 12 | 57 | 69 | 298 | 1.273 | 0.480 | 0.669 | 0.537 | 755.89 | 54.39 | 118 | 298 | 1605 | 172.8 | 9.33  |
| P20917   | Myelin-associated glycoprotein OS=Mus musculus GN=Mag PE=1 SV=2 - [MAG_MOUSE]                                  | 31.31 | 1  | 3  | 17 | 196 | 1.588 | 0.224 | 0.646 | 0.537 | 630.89 | 31.31 | 30  | 196 | 626  | 69.2  | 5.10  |
| F6ZM34   | Trinucleotide repeat-containing gene 6A protein OS=Mus musculus GN=Tnrc6a PE=2 SV=2 - [F6ZM34_MOUSE]           | 3.06  | 2  | 3  | 3  | 9   | 1.580 | 0.430 | 0.922 | 0.537 | 13.09  | 3.06  | 4   | 9   | 1896 | 203.0 | 6.99  |
| A2AFS3   | UPF0577 protein KIAA1324 OS=Mus musculus GN=Kiaa1324 PE=2 SV=1 - [KIAA1324_MOUSE]                              | 9.91  | 3  | 8  | 8  | 19  | 0.923 | 0.933 | 0.521 | 0.537 | 57.15  | 9.91  | 13  | 19  | 1009 | 110.6 | 6.38  |
| E0CY96   | tRNA-splicing endonuclease subunit Sen15 OS=Mus musculus GN=Tsen15 PE=2 SV=1 - [E0CY96_MOUSE]                  | 14.06 | 2  | 1  | 1  | 2   | 1.008 | 0.515 | 0.667 | 0.537 | 5.89   | 14.06 | 2   | 2   | 128  | 14.0  | 4.41  |
| Q9QY16   | DnaJ homolog subfamily B member 9 OS=Mus musculus GN=Dnajb9 PE=2 SV=2 - [DNAJB9_MOUSE]                         | 6.76  | 1  | 1  | 1  | 4   | 1.147 | 0.467 | 0.430 | 0.544 | 14.21  | 6.76  | 2   | 4   | 222  | 25.6  | 8.28  |

|          |                                                                                                                        |       |   |    |    |     |       |       |       |       |        |       |    |     |      |       |       |
|----------|------------------------------------------------------------------------------------------------------------------------|-------|---|----|----|-----|-------|-------|-------|-------|--------|-------|----|-----|------|-------|-------|
| Q5MPP0-2 | Isoform 2 of Fatty acid 2-hydroxylase OS=Mus musculus GN=Fa2h - [FA2H_MOUSE]                                           | 8.63  | 2 | 2  | 2  | 6   | 2.114 | 0.304 | 0.481 | 0.544 | 22.68  | 8.63  | 4  | 6   | 313  | 36.4  | 7.09  |
| B8JJD1   | Protein Fance (Fragment) OS=Mus musculus GN=Fance PE=2 SV=1 - [B8JJD1_MOUSE]                                           | 11.63 | 4 | 1  | 1  | 1   | 0.596 | 0.747 | 0.928 | 0.545 | 0.00   | 11.63 | 1  | 1   | 129  | 14.6  | 5.15  |
| E9Q9D6   | R3H domain-containing protein 2 OS=Mus musculus GN=R3hdm2 PE=2 SV=1 -                                                  | 9.30  | 7 | 5  | 7  | 16  | 0.649 | 0.619 | 0.830 | 0.546 | 37.20  | 9.30  | 10 | 16  | 978  | 106.8 | 8.91  |
| Q9JMG1   | Endothelial differentiation-related factor 1 OS=Mus musculus GN=Edf1 PE=1 SV=1 - [EDF1_MOUSE]                          | 37.84 | 1 | 7  | 7  | 28  | 1.121 | 0.505 | 0.853 | 0.546 | 72.94  | 37.84 | 12 | 28  | 148  | 16.4  | 9.99  |
| Q9QZJ8   | Serine incorporator 1 OS=Mus musculus GN=Serinc1 PE=1 SV=1 - [SERC1_MOUSE]                                             | 5.74  | 1 | 2  | 2  | 2   | 0.350 | 0.638 | 0.731 | 0.546 | 7.37   | 5.74  | 2  | 2   | 453  | 50.5  | 6.28  |
| Q91WD8   | Protein Slc24a1 OS=Mus musculus GN=Slc24a1 PE=2 SV=1 - [Q91WD8_MOUSE]                                                  | 5.31  | 1 | 3  | 3  | 4   | 3.640 | 2.786 | 0.738 | 0.548 | 2.23   | 5.31  | 3  | 4   | 1130 | 124.6 | 4.65  |
| Q9WVS8-5 | Isoform 5 of Mitogen-activated protein kinase 7 OS=Mus musculus GN=Mapk7 -                                             | 7.67  | 6 | 4  | 4  | 11  | 0.676 | 0.466 | 0.944 | 0.548 | 22.04  | 7.67  | 6  | 11  | 756  | 82.3  | 6.46  |
| G3UYZ1   | Immunoglobulin superfamily member 8 OS=Mus musculus GN=Igsf8 PE=2 SV=1 - [G3UYZ1_MOUSE]                                | 39.78 | 2 | 1  | 16 | 185 | 0.956 | 0.386 | 0.989 | 0.551 | 681.36 | 39.78 | 31 | 185 | 548  | 58.1  | 7.91  |
| Q569L8   | Centromere protein J OS=Mus musculus GN=Cenpj PE=2 SV=2 - [CENPJ_MOUSE]                                                | 2.38  | 1 | 2  | 4  | 9   | 0.638 | 1.714 | 1.930 | 0.551 | 23.35  | 2.38  | 4  | 9   | 1344 | 153.0 | 6.55  |
| Q9ERB0   | Synaptosomal-associated protein 29 OS=Mus musculus GN=Snap29 PE=1 SV=1 -                                               | 50.77 | 1 | 12 | 12 | 87  | 1.485 | 0.923 | 0.962 | 0.554 | 169.81 | 50.77 | 21 | 87  | 260  | 29.6  | 5.38  |
| Q6A078   | Centrosomal protein of 290 kDa OS=Mus musculus GN=Cep290 PE=1 SV=2 -                                                   | 2.79  | 3 | 4  | 8  | 18  | 0.824 | 0.697 | 0.471 | 0.555 | 44.11  | 2.79  | 10 | 18  | 2472 | 288.9 | 6.10  |
| Q3UK98   | Chromobox protein homolog 6 OS=Mus musculus GN=Cbx6 PE=2 SV=1 - [Q3UK98_MOUSE]                                         | 10.10 | 4 | 4  | 4  | 4   | 0.741 | 0.720 | 0.576 | 0.555 | 12.14  | 10.10 | 4  | 4   | 396  | 42.5  | 9.95  |
| Q9R0B9   | Procollagen-lysine, 2-oxoglutarate 5-dioxygenase 2 OS=Mus musculus GN=Plod2 PE=2 SV=2 - [PLOD2_MOUSE]                  | 1.63  | 2 | 1  | 1  | 1   | 2.399 | 0.735 | 0.622 | 0.555 | 2.69   | 1.63  | 1  | 1   | 737  | 84.4  | 6.89  |
| O08538   | Angiopoietin-1 OS=Mus musculus GN=Angpt1 PE=2 SV=2 - [ANGP1_MOUSE]                                                     | 2.81  | 1 | 1  | 1  | 1   | 2.360 | 1.037 | 0.631 | 0.556 | 4.04   | 2.81  | 1  | 1   | 498  | 57.5  | 6.76  |
| Q8K4L2   | Archvillin OS=Mus musculus GN=Svil PE=2 SV=1 - [Q8K4L2_MOUSE]                                                          | 4.58  | 5 | 7  | 8  | 10  | 1.072 | 0.859 | 0.493 | 0.558 | 25.10  | 4.58  | 9  | 10  | 2031 | 226.7 | 7.94  |
| Q6NXL1   | Protein Sec24d OS=Mus musculus GN=Sec24d PE=2 SV=1 - [Q6NXL1_MOUSE]                                                    | 3.00  | 1 | 2  | 3  | 5   | 0.638 | 1.122 | 0.501 | 0.558 | 12.92  | 3.00  | 5  | 5   | 1032 | 112.6 | 7.18  |
| D3YTQ9   | 40S ribosomal protein S15 OS=Mus musculus GN=Rps15 PE=2 SV=1 - [D3YTQ9_MOUSE]                                          | 33.05 | 3 | 4  | 4  | 9   | 0.652 | 0.282 | 0.830 | 0.559 | 12.73  | 33.05 | 5  | 9   | 118  | 13.7  | 10.59 |
| Q9D735   | Uncharacterized protein C19orf43 homolog OS=Mus musculus PE=2 SV=1 - [CS043_MOUSE]                                     | 21.97 | 1 | 3  | 3  | 16  | 0.748 | 0.320 | 0.979 | 0.560 | 33.45  | 21.97 | 6  | 16  | 173  | 18.4  | 9.67  |
| O88508   | DNA (cytosine-5)-methyltransferase 3A OS=Mus musculus GN=Dnmt3a PE=1 SV=2 -                                            | 5.51  | 6 | 3  | 3  | 6   | 2.335 | 1.734 | 1.305 | 0.561 | 9.31   | 5.51  | 3  | 6   | 908  | 101.6 | 6.65  |
| P50543   | Protein S100-A11 OS=Mus musculus GN=S100a11 PE=2 SV=1 - [S100A_MOUSE]                                                  | 43.88 | 1 | 4  | 4  | 19  | 1.350 | 1.993 | 0.451 | 0.563 | 51.60  | 43.88 | 7  | 19  | 98   | 11.1  | 5.45  |
| P29699   | Alpha-2-HS-glycoprotein OS=Mus musculus GN=Ahsg PE=1 SV=1 - [FETUA_MOUSE]                                              | 44.06 | 1 | 10 | 10 | 63  | 2.666 | 1.391 | 0.380 | 0.564 | 244.73 | 44.06 | 19 | 63  | 345  | 37.3  | 6.51  |
| Q9NWX9   | Melanoma-associated antigen H1 OS=Mus musculus GN=Mageh1 PE=2 SV=1 -                                                   | 9.17  | 1 | 1  | 1  | 4   | 0.459 | 0.607 | 0.586 | 0.565 | 17.86  | 9.17  | 2  | 4   | 218  | 24.3  | 9.48  |
| P36423   | Thromboxane-A synthase OS=Mus musculus GN=Txas1 PE=2 SV=2 - [THAS_MOUSE]                                               | 2.63  | 1 | 1  | 1  | 2   | 1.617 | 1.251 | 0.913 | 0.565 | 2.24   | 2.63  | 1  | 2   | 533  | 60.4  | 7.15  |
| Q76854   | Rab effector Noc2 OS=Mus musculus GN=Rph3al PE=1 SV=1 - [RPH3L_MOUSE]                                                  | 1.99  | 1 | 1  | 1  | 1   | 0.582 | 1.145 | 0.744 | 0.567 | 2.04   | 1.99  | 1  | 1   | 302  | 33.2  | 8.82  |
| G5E8Q8   | MCG115189 OS=Mus musculus GN=Gpr116 PE=4 SV=1 - [G5E8Q8_MOUSE]                                                         | 3.41  | 1 | 2  | 2  | 4   | 0.966 | 1.069 | 0.649 | 0.567 | 11.06  | 3.41  | 3  | 4   | 1348 | 149.3 | 7.02  |
| Q80W00-2 | Isoform 2 of Serine/threonine-protein phosphatase 1 regulatory subunit 10 OS=Mus musculus GN=Ppp1r10 - [PPP1R10_MOUSE] | 4.35  | 2 | 3  | 3  | 4   | 3.152 | 0.566 | 0.860 | 0.567 | 11.53  | 4.35  | 4  | 4   | 874  | 93.0  | 9.16  |

|          |                                                                                                                        |       |    |    |    |     |        |        |       |       |         |       |    |     |      |       |       |
|----------|------------------------------------------------------------------------------------------------------------------------|-------|----|----|----|-----|--------|--------|-------|-------|---------|-------|----|-----|------|-------|-------|
| Q8C2K1-2 | Isoform 2 of Differentially expressed in FDCP 6<br>OS=Mus musculus<br>GN=Def6 - [DEF16_MOUSE]                          | 7.00  | 2  | 2  | 2  | 4   | 2.939  | 0.537  | 0.771 | 0.567 | 11.46   | 7.00  | 4  | 4   | 257  | 29.8  | 8.29  |
| Q9WTL4   | Insulin receptor-related protein OS=Mus musculus<br>GN=Insr PE=1 SV=2 - [INSR_MOUSE]                                   | 2.54  | 1  | 2  | 3  | 4   | 5.023  | 12.078 | 0.754 | 0.567 | 4.22    | 2.54  | 3  | 4   | 1300 | 144.8 | 6.64  |
| P43276   | Histone H1.5 OS=Mus musculus<br>GN=Hist1h1b PE=1 SV=2 - [H15_MOUSE]                                                    | 38.57 | 1  | 7  | 13 | 68  | 0.533  | 0.528  | 0.656 | 0.568 | 162.52  | 38.57 | 24 | 68  | 223  | 22.6  | 10.92 |
| Q6ZWQ9   | MCG5400 OS=Mus musculus<br>GN=My112a PE=2 SV=1 - [Q6ZWQ9_MOUSE]                                                        | 49.42 | 3  | 1  | 7  | 117 | 1.432  | 0.490  | 0.464 | 0.568 | 350.96  | 49.42 | 13 | 117 | 172  | 19.9  | 4.81  |
| Q8R0A6   | V-set and transmembrane domain-containing protein 2A OS=Mus musculus<br>GN=Vstm2a PE=2 SV=2 - [VTM2A_MOUSE]            | 5.51  | 2  | 1  | 1  | 3   | 1.217  | 0.909  | 0.761 | 0.570 | 7.53    | 5.51  | 2  | 3   | 236  | 25.9  | 8.27  |
| E9PWE8   | Dihydropyrimidinase-related protein 3 OS=Mus musculus<br>GN=Dpysl3 PE=2 SV=1 -                                         | 61.49 | 5  | 27 | 33 | 852 | 1.045  | 0.565  | 0.539 | 0.570 | 2338.20 | 61.49 | 61 | 852 | 683  | 73.8  | 6.46  |
| K4DID3   | Developmental pluripotency-associated protein 3 (Fragment)<br>OS=Mus musculus<br>GN=Dppa3 PE=4 SV=1 - [K4DID3_MOUSE]   | 9.93  | 1  | 1  | 1  | 1   | 12.292 | 4.121  | 1.280 | 0.571 | 2.36    | 9.93  | 1  | 1   | 141  | 16.6  | 10.80 |
| E9Q7T7   | Protein Chadl OS=Mus musculus<br>GN=Chadl PE=2 SV=1 - [E9Q7T7_MOUSE]                                                   | 10.43 | 3  | 8  | 8  | 14  | 0.721  | 0.578  | 0.552 | 0.573 | 37.39   | 10.43 | 13 | 14  | 748  | 81.3  | 8.87  |
| Q8VE98   | CD276 antigen OS=Mus musculus<br>GN=Cd276 PE=1 SV=1 - [CD276_MOUSE]                                                    | 17.72 | 1  | 4  | 4  | 6   | 0.679  | 1.181  | 0.552 | 0.574 | 18.40   | 17.72 | 6  | 6   | 316  | 34.0  | 4.82  |
| P97452   | Ribosome biogenesis protein BOP1 OS=Mus musculus<br>GN=Bop1 PE=1 SV=1 - [BOP1_MOUSE]                                   | 3.14  | 1  | 3  | 3  | 6   | 1.331  | 0.897  | 0.814 | 0.576 | 17.10   | 3.14  | 4  | 6   | 732  | 82.5  | 6.28  |
| P97864   | Caspase-7 OS=Mus musculus<br>GN=Casp7 PE=1 SV=2 - [CASP7_MOUSE]                                                        | 7.92  | 1  | 2  | 2  | 3   | 1.435  | 0.549  | 0.657 | 0.578 | 8.78    | 7.92  | 3  | 3   | 303  | 34.0  | 6.33  |
| P12660   | Purkinje cell protein 2 OS=Mus musculus<br>GN=Pcp2 PE=2 SV=2 - [PCP2_MOUSE]                                            | 40.83 | 2  | 4  | 4  | 19  | 3.253  | 1.190  | 2.159 | 0.579 | 65.20   | 40.83 | 6  | 19  | 120  | 13.0  | 5.14  |
| Q8CG48   | Structural maintenance of chromosomes protein 2 OS=Mus musculus<br>GN=Smc2 PE=1 SV=2 - [SMC2_MOUSE]                    | 2.69  | 1  | 3  | 3  | 9   | 1.089  | 0.776  | 0.628 | 0.580 | 21.01   | 2.69  | 4  | 9   | 1191 | 134.2 | 8.41  |
| Q921K2   | Poly (ADP-ribose) polymerase family, member 1 OS=Mus musculus<br>GN=Parp1 PE=2 SV=1 - [Q921K2_MOUSE]                   | 17.16 | 3  | 15 | 15 | 34  | 0.871  | 0.526  | 0.787 | 0.582 | 86.51   | 17.16 | 23 | 34  | 1014 | 112.7 | 8.95  |
| Q9R0X2   | ADAM DEC1 OS=Mus musculus<br>GN=Adamdec1 PE=2 SV=1 - [ADEC1_MOUSE]                                                     | 3.21  | 1  | 1  | 1  | 1   | 3.247  | 1.467  | 0.441 | 0.582 | 0.00    | 3.21  | 1  | 1   | 467  | 52.9  | 8.48  |
| P70213   | Friend virus susceptibility protein 1 OS=Mus musculus<br>GN=Fv1 PE=2 SV=1 - [FV1_MOUSE]                                | 7.41  | 1  | 2  | 2  | 3   | 0.669  | 0.782  | 0.325 | 0.583 | 12.47   | 7.41  | 3  | 3   | 459  | 52.0  | 5.26  |
| Q8VDP2   | UPF0428 protein Cxorf56 homolog OS=Mus musculus<br>PE=2 SV=1 - [CX056_MOUSE]                                           | 22.52 | 2  | 5  | 5  | 14  | 1.310  | 0.625  | 0.807 | 0.583 | 34.46   | 22.52 | 7  | 14  | 222  | 25.6  | 8.73  |
| Q9Z0F8   | Disintegrin and metalloproteinase domain-containing protein 17 OS=Mus musculus<br>GN=Adam17 PE=1 SV=3 - [ADAM17_MOUSE] | 11.97 | 5  | 8  | 8  | 19  | 0.975  | 0.881  | 0.775 | 0.583 | 41.72   | 11.97 | 14 | 19  | 827  | 93.0  | 5.94  |
| Q8R344   | Coiled-coil domain-containing protein 12 OS=Mus musculus<br>GN=Ccdc12 PE=1 SV=2 - [CCD12_MOUSE]                        | 18.07 | 1  | 2  | 2  | 8   | 0.929  | 0.361  | 0.962 | 0.584 | 14.09   | 18.07 | 4  | 8   | 166  | 18.9  | 7.21  |
| Q69ZA1-2 | Isoform 2 of Cyclin-dependent kinase 13 OS=Mus musculus<br>GN=Cdk13 -                                                  | 4.62  | 16 | 3  | 5  | 31  | 1.370  | 1.228  | 0.840 | 0.585 | 56.43   | 4.62  | 8  | 31  | 1451 | 158.0 | 9.70  |
| O88874   | Cyclin-K OS=Mus musculus<br>GN=Ccnk PE=1 SV=3 - [CCNK_MOUSE]                                                           | 9.39  | 2  | 4  | 5  | 10  | 48.442 | 1.402  | 0.950 | 0.588 | 34.36   | 9.39  | 7  | 10  | 554  | 61.3  | 8.41  |
| K7N6K8   | Protein Sult2a7 OS=Mus musculus<br>GN=Sult2a7 PE=4 SV=1 - [K7N6K8_MOUSE]                                               | 2.68  | 1  | 1  | 1  | 2   | 2.388  | 1.136  | 0.727 | 0.589 | 1.73    | 2.68  | 1  | 2   | 298  | 34.7  | 6.70  |
| Q80W32   | IQ domain-containing protein G OS=Mus musculus<br>GN=Iqcg PE=2 SV=1 - [IQCG_MOUSE]                                     | 3.10  | 1  | 1  | 1  | 1   | 2.111  | 1.439  | 1.490 | 0.590 | 2.24    | 3.10  | 1  | 1   | 419  | 49.1  | 5.73  |
| Q61555   | Fibrillin-2 OS=Mus musculus<br>GN=Fbn2 PE=1 SV=2 - [FBN2_MOUSE]                                                        | 1.79  | 1  | 4  | 6  | 9   | 0.889  | 2.638  | 0.633 | 0.590 | 18.37   | 1.79  | 7  | 9   | 2907 | 313.6 | 4.84  |
| Q3TIV5   | Zinc finger CCH domain-containing protein 15 OS=Mus musculus<br>GN=Zc3h15 PE=1 SV=2 - [ZC3HF_MOUSE]                    | 14.79 | 3  | 6  | 6  | 23  | 1.004  | 0.585  | 1.056 | 0.591 | 56.33   | 14.79 | 12 | 23  | 426  | 48.3  | 5.30  |



|          |                                                                                                                                      |       |   |    |    |      |       |       |       |       |         |       |    |      |      |       |       |
|----------|--------------------------------------------------------------------------------------------------------------------------------------|-------|---|----|----|------|-------|-------|-------|-------|---------|-------|----|------|------|-------|-------|
| Q8BMK4   | Cytoskeleton-associated protein 4 OS=Mus musculus GN=Ckap4 PE=2 SV=2 - [CKAP4_MOUSE]                                                 | 55.30 | 6 | 28 | 29 | 164  | 1.048 | 0.932 | 0.673 | 0.593 | 447.66  | 55.30 | 53 | 164  | 575  | 63.7  | 5.64  |
| Q8R1N0   | Zinc finger protein 830 OS=Mus musculus GN=Znf830 PE=1 SV=1 - [ZN830_MOUSE]                                                          | 10.74 | 1 | 4  | 4  | 9    | 1.500 | 0.479 | 0.972 | 0.594 | 28.05   | 10.74 | 5  | 9    | 363  | 40.6  | 5.40  |
| Q9CQ94   | DnaJ homolog subfamily C member 5B OS=Mus musculus GN=Dnajc5b PE=1 SV=1 -                                                            | 11.56 | 1 | 1  | 2  | 3    | 7.609 | 0.931 | 0.744 | 0.595 | 7.78    | 11.56 | 3  | 3    | 199  | 22.6  | 5.62  |
| Q9D1C2   | Protein chibby homolog 1 OS=Mus musculus GN=Cby1 PE=2 SV=1 - [CBY1_MOUSE]                                                            | 9.45  | 1 | 1  | 1  | 1    | 1.284 | 1.151 | 1.091 | 0.595 | 0.00    | 9.45  | 1  | 1    | 127  | 14.5  | 9.35  |
| F8VQH0   | Abelson tyrosine-protein kinase 2 OS=Mus musculus GN=Abl2 PE=2 SV=1 - [F8VQH0_MOUSE]                                                 | 26.14 | 3 | 1  | 25 | 79   | 0.596 | 1.023 | 1.025 | 0.595 | 184.08  | 26.14 | 41 | 79   | 1182 | 128.1 | 7.84  |
| E9Q4X2   | Protein Ugg2 OS=Mus musculus GN=Ugg2 PE=2 SV=1 - [E9Q4X2_MOUSE]                                                                      | 3.72  | 3 | 3  | 8  | 9    | 0.880 | 0.841 | 0.549 | 0.596 | 20.05   | 3.72  | 9  | 9    | 1504 | 172.7 | 6.20  |
| Q9DBW3   | Protein GTLF3B OS=Mus musculus GN=Gtlf3b PE=2 SV=1 - [GTL3B_MOUSE]                                                                   | 21.82 | 1 | 2  | 2  | 3    | 3.162 | 0.768 | 0.775 | 0.596 | 5.47    | 21.82 | 3  | 3    | 110  | 12.7  | 8.47  |
| Q6PGA0-2 | Isoform 2 of REST corepressor 3 OS=Mus musculus GN=Rcor3 - [RCOR3_MOUSE]                                                             | 11.06 | 5 | 4  | 4  | 8    | 0.997 | 0.787 | 0.652 | 0.598 | 20.56   | 11.06 | 5  | 8    | 434  | 47.4  | 6.80  |
| Q3UX62   | Coiled-coil domain-containing protein 114 OS=Mus musculus GN=Ccdc114 PE=2 SV=1 - [CC114_MOUSE]                                       | 6.99  | 1 | 1  | 2  | 2    | 1.834 | 1.067 | 0.930 | 0.598 | 1.93    | 6.99  | 2  | 2    | 658  | 74.1  | 7.25  |
| O35930   | Platelet glycoprotein Ib alpha chain OS=Mus musculus GN=Gp1ba PE=2 SV=2 -                                                            | 3.95  | 1 | 1  | 1  | 3    | 1.722 | 0.454 | 0.814 | 0.600 | 0.00    | 3.95  | 1  | 3    | 734  | 80.0  | 5.87  |
| Q3UNY1   | Protein Gm16833 (Fragment) OS=Mus musculus GN=Gm16833 PE=2 SV=1 -                                                                    | 10.45 | 1 | 1  | 1  | 1    | 1.130 | 0.458 | 0.596 | 0.600 | 0.00    | 10.45 | 1  | 1    | 67   | 7.7   | 8.41  |
| Q60972   | Histone-binding protein RBBP4 OS=Mus musculus GN=Rbbp4 PE=1 SV=5 - [RBBP4_MOUSE]                                                     | 36.47 | 2 | 6  | 12 | 55   | 1.330 | 0.575 | 0.817 | 0.600 | 146.88  | 36.47 | 22 | 55   | 425  | 47.6  | 4.89  |
| Q9CIU3   | Synaptonemal complex protein 2 OS=Mus musculus GN=Sycp2 PE=1 SV=2 - [SYCP2_MOUSE]                                                    | 2.93  | 1 | 3  | 3  | 6    | 3.494 | 1.493 | 0.349 | 0.601 | 10.82   | 2.93  | 3  | 6    | 1500 | 172.0 | 7.93  |
| Q9EQ08   | Heparan N-sulfatase OS=Mus musculus GN=Sgsh PE=2 SV=1 - [Q9EQ08_MOUSE]                                                               | 6.57  | 1 | 2  | 2  | 3    | 5.458 | 0.480 | 0.590 | 0.602 | 10.46   | 6.57  | 3  | 3    | 502  | 56.7  | 6.37  |
| Q8R0J4-2 | Isoform 2 of Transmembrane protein 134 OS=Mus musculus GN=Tmem134 -                                                                  | 4.44  | 3 | 1  | 1  | 2    | 1.187 | 0.858 | 0.731 | 0.603 | 6.01    | 4.44  | 2  | 2    | 180  | 20.2  | 6.54  |
| Q8R409   | Protein HEX1M1 OS=Mus musculus GN=Hexm1 PE=1 SV=1 - [HEX11_MOUSE]                                                                    | 21.07 | 1 | 5  | 5  | 15   | 1.014 | 0.871 | 0.874 | 0.603 | 39.79   | 21.07 | 9  | 15   | 356  | 40.2  | 5.38  |
| E0CX20   | Protein BUD31 homolog OS=Mus musculus GN=Bud31 PE=4 SV=1 - [E0CX20_MOUSE]                                                            | 32.64 | 2 | 5  | 5  | 9    | 0.986 | 0.556 | 0.602 | 0.603 | 30.98   | 32.64 | 9  | 9    | 144  | 17.0  | 8.82  |
| Q61098   | Interleukin-18 receptor 1 OS=Mus musculus GN=Il18r1 PE=2 SV=1 - [IL18R_MOUSE]                                                        | 5.77  | 1 | 2  | 2  | 2    | 0.898 | 1.205 | 1.160 | 0.604 | 2.36    | 5.77  | 2  | 2    | 537  | 61.6  | 7.77  |
| Q9QYS9-4 | Isoform 4 of Protein quaking OS=Mus musculus GN=Qki - [QKI_MOUSE]                                                                    | 32.92 | 8 | 9  | 10 | 52   | 1.305 | 0.420 | 0.635 | 0.605 | 137.84  | 32.92 | 19 | 52   | 319  | 35.1  | 7.43  |
| Q8CH77   | Neuron navigator 1 OS=Mus musculus GN=Nav1 PE=1 SV=2 - [NAV1_MOUSE]                                                                  | 23.20 | 4 | 35 | 36 | 87   | 0.772 | 0.614 | 1.014 | 0.605 | 261.87  | 23.20 | 61 | 87   | 1875 | 202.2 | 8.06  |
| G3X9I4   | Aly/REF export factor 2 OS=Mus musculus GN=Alyref2 PE=4 SV=1 - [G3X9I4_MOUSE]                                                        | 18.35 | 2 | 1  | 3  | 23   | 1.534 | 0.341 | 0.702 | 0.606 | 60.33   | 18.35 | 6  | 23   | 218  | 23.8  | 10.14 |
| Q9JLG8-2 | Isoform 2 of Calpain-15 OS=Mus musculus GN=Solh - [CAN15_MOUSE]                                                                      | 1.40  | 2 | 1  | 1  | 2    | 0.767 | 1.415 | 1.115 | 0.607 | 7.27    | 1.40  | 1  | 2    | 1072 | 115.3 | 6.52  |
| P83917   | Chromobox protein homolog 1 OS=Mus musculus GN=Cbx1 PE=1 SV=1 - [CBX1_MOUSE]                                                         | 33.51 | 3 | 4  | 5  | 21   | 1.569 | 0.805 | 0.913 | 0.607 | 69.40   | 33.51 | 9  | 21   | 185  | 21.4  | 4.93  |
| Q8J2K9   | Hydroxymethylglutaryl-CoA synthase, cytoplasmic OS=Mus musculus GN=Hmgcs1 PE=1 SV=1 - [HMCS1_MOUSE]                                  | 28.46 | 1 | 14 | 15 | 60   | 0.946 | 0.377 | 0.517 | 0.607 | 181.84  | 28.46 | 27 | 60   | 520  | 57.5  | 5.99  |
| Q8BXJ2   | Transcriptional-regulating factor 1 OS=Mus musculus GN=Ttrf1 PE=1 SV=1 - [TREF1_MOUSE]                                               | 1.83  | 3 | 1  | 1  | 3    | 0.790 | 1.153 | 1.641 | 0.607 | 3.67    | 1.83  | 2  | 3    | 1205 | 132.3 | 6.77  |
| Q8R5A3   | Amyloid beta A4 precursor protein-binding family B member 1-interacting protein OS=Mus musculus GN=Aobb1ip PE=1 SV=2 - [AB1IP_MOUSE] | 7.01  | 1 | 3  | 4  | 9    | 1.305 | 1.006 | 0.579 | 0.608 | 20.41   | 7.01  | 7  | 9    | 670  | 74.3  | 5.35  |
| P04370-9 | Isoform 9 of Myelin basic protein OS=Mus musculus GN=Mbp - [MBP_MOUSE]                                                               | 77.72 | 6 | 1  | 22 | 2309 | 1.373 | 0.072 | 0.754 | 0.609 | 6552.04 | 77.72 | 40 | 2309 | 184  | 20.2  | 11.02 |

|          |                                                                                                                    |       |     |    |    |     |        |       |       |       |         |       |    |     |      |       |       |
|----------|--------------------------------------------------------------------------------------------------------------------|-------|-----|----|----|-----|--------|-------|-------|-------|---------|-------|----|-----|------|-------|-------|
| Q9D0K2   | Succinyl-CoA:3-ketoacid coenzyme A transferase 1, mitochondrial OS=Mus musculus GN=Oxct1 PE=1 SV=1 - [SCOT1_MOUSE] | 54.23 | 2   | 20 | 20 | 259 | 0.800  | 0.672 | 0.671 | 0.610 | 771.07  | 54.23 | 37 | 259 | 520  | 56.0  | 8.53  |
| Q8BGCO   | HIV Tat-specific factor 1 homolog OS=Mus musculus GN=Htatsf1 PE=1 SV=1 -                                           | 23.65 | 2   | 11 | 12 | 42  | 1.339  | 0.828 | 0.879 | 0.611 | 119.68  | 23.65 | 20 | 42  | 757  | 86.2  | 4.40  |
| O54990-6 | isoform 6 of Prominin-1 OS=Mus musculus GN=Prom1 - [PROM1_MOUSE]                                                   | 23.69 | 6   | 1  | 14 | 37  | 2.024  | 0.959 | 0.693 | 0.611 | 91.55   | 23.69 | 22 | 37  | 823  | 92.1  | 6.55  |
| Q8BVF4-2 | isoform 2 of Coiled-coil domain-containing protein 30 OS=Mus musculus GN=Ccdc30 - [CCD30_MOUSE]                    | 5.08  | 4   | 3  | 4  | 7   | 1.986  | 1.001 | 0.760 | 0.612 | 14.67   | 5.08  | 6  | 7   | 649  | 75.5  | 6.48  |
| Q91WE2   | Protein FAM192A OS=Mus musculus GN=Fam192a PE=2 SV=1 - [F192A_MOUSE]                                               | 9.45  | 1   | 2  | 3  | 4   | 1.135  | 0.824 | 1.016 | 0.612 | 12.32   | 9.45  | 4  | 4   | 254  | 28.7  | 5.14  |
| Q07646-2 | isoform 2 of Mesoderm-specific transcript protein OS=Mus musculus GN=Mest - [MEST_MOUSE]                           | 22.39 | 5   | 4  | 4  | 10  | 0.672  | 0.688 | 0.421 | 0.613 | 34.76   | 22.39 | 8  | 10  | 326  | 37.6  | 9.44  |
| H3BLH4   | TSC22 domain family protein 1 (Fragment) OS=Mus musculus GN=Tsc22d1 PE=2 SV=1 - [H3BLH4_MOUSE]                     | 11.36 | 1   | 1  | 1  | 1   | 11.331 | 1.767 | 1.614 | 0.613 | 2.53    | 11.36 | 1  | 1   | 132  | 13.5  | 4.59  |
| Q8K083   | Zinc finger protein 536 OS=Mus musculus GN=Znf536 PE=2 SV=1 - [ZN536_MOUSE]                                        | 4.30  | 146 | 2  | 5  | 9   | 0.796  | 0.650 | 1.418 | 0.613 | 16.62   | 4.30  | 7  | 9   | 1302 | 141.5 | 7.33  |
| D3Z4D1   | Protein JTB OS=Mus musculus GN=Jtb PE=2 SV=1 - [D3Z4D1_MOUSE]                                                      | 21.05 | 2   | 2  | 2  | 4   | 1.143  | 0.760 | 0.321 | 0.613 | 9.08    | 21.05 | 2  | 4   | 95   | 10.5  | 7.55  |
| E9Q507   | GON-4-like protein OS=Mus musculus GN=Gon4l PE=4 SV=1 - [E9Q507_MOUSE]                                             | 2.32  | 3   | 3  | 3  | 6   | 1.172  | 0.907 | 1.098 | 0.614 | 12.32   | 2.32  | 4  | 6   | 2242 | 246.6 | 4.86  |
| E9P2T5   | Tumor necrosis factor receptor superfamily member 12A OS=Mus musculus GN=Trnfrsf12a PE=2 SV=1 -                    | 19.15 | 1   | 1  | 1  | 3   | 1.238  | 0.355 | 0.503 | 0.614 | 3.83    | 19.15 | 2  | 3   | 94   | 10.0  | 10.52 |
| P62960   | Nuclease-sensitive element binding protein 1 OS=Mus musculus GN=Ybx1 PE=1 SV=3 - [YBOX1_MOUSE]                     | 31.68 | 4   | 4  | 7  | 14  | 0.955  | 0.343 | 0.632 | 0.615 | 35.04   | 31.68 | 10 | 14  | 322  | 35.7  | 9.88  |
| Q811B5   | Proline-rich protein 3 OS=Mus musculus GN=Prr3 PE=2 SV=1 - [PRR3_MOUSE]                                            | 13.68 | 6   | 3  | 3  | 14  | 0.901  | 0.441 | 0.809 | 0.615 | 36.45   | 13.68 | 5  | 14  | 190  | 21.2  | 9.85  |
| Q80ZD3-2 | isoform 2 of Sodium-independent sulfate anion transporter OS=Mus musculus GN=Slc26a11 - [S2611_MOUSE]              | 1.90  | 2   | 1  | 1  | 1   | 1.311  | 0.576 | 0.956 | 0.615 | 0.00    | 1.90  | 1  | 1   | 421  | 45.2  | 7.14  |
| Q9D6V8   | Polyadenylate-binding protein-interacting protein 2 OS=Mus musculus GN=Paip2 PE=2 SV=1 - [PAIP2_MOUSE]             | 45.97 | 1   | 3  | 3  | 16  | 1.685  | 0.767 | 0.902 | 0.616 | 41.16   | 45.97 | 5  | 16  | 124  | 14.7  | 4.12  |
| Q9CY58   | Plasminogen activator inhibitor 1 RNA-binding protein OS=Mus musculus GN=Serbp1 PE=1 SV=2 - [PAIRB_MOUSE]          | 33.42 | 4   | 14 | 14 | 133 | 0.802  | 0.465 | 1.035 | 0.616 | 363.99  | 33.42 | 26 | 133 | 407  | 44.7  | 8.54  |
| O89103   | Complement component C1q receptor OS=Mus musculus GN=Cd93 PE=1 SV=1 - [C1QR1_MOUSE]                                | 10.25 | 1   | 5  | 5  | 12  | 0.911  | 0.595 | 0.656 | 0.617 | 39.22   | 10.25 | 8  | 12  | 644  | 69.3  | 5.07  |
| E9Q9A3   | Clathrin coat assembly protein AP180 OS=Mus musculus GN=Snap91 PE=4 SV=2 - [E9Q9A3_MOUSE]                          | 37.11 | 5   | 1  | 29 | 390 | 2.333  | 0.687 | 0.851 | 0.618 | 1155.75 | 37.11 | 51 | 390 | 838  | 86.0  | 5.07  |
| E9QMD2   | Ubiquitin-conjugating enzyme E2Q-like protein 1 OS=Mus musculus GN=Ube2q1 PE=2 SV=1 - [E9QMD2_MOUSE]               | 13.16 | 1   | 2  | 2  | 7   | 0.555  | 0.497 | 0.910 | 0.618 | 22.00   | 13.16 | 3  | 7   | 304  | 32.6  | 10.10 |
| Q7TT18   | Activating transcription factor 7-interacting protein 1 OS=Mus musculus GN=Atf7ip PE=1 SV=1 - [MCAF1_MOUSE]        | 7.96  | 1   | 5  | 5  | 11  | 1.130  | 0.959 | 0.955 | 0.621 | 38.92   | 7.96  | 9  | 11  | 1306 | 138.5 | 4.77  |
| Q8VCH6   | Delta(24)-sterol reductase OS=Mus musculus GN=Dhcr24 PE=2 SV=1 - [DHC24_MOUSE]                                     | 6.20  | 1   | 4  | 4  | 9   | 0.834  | 0.442 | 0.579 | 0.623 | 20.41   | 6.20  | 8  | 9   | 516  | 60.1  | 8.16  |
| Q80XN0   | D-beta-hydroxybutyrate dehydrogenase, mitochondrial OS=Mus musculus GN=Bdh1 PE=1 SV=2 - [BDH_MOUSE]                | 55.10 | 2   | 15 | 17 | 189 | 0.605  | 0.531 | 0.639 | 0.623 | 606.91  | 55.10 | 31 | 189 | 343  | 38.3  | 9.01  |
| P47867-2 | isoform 2 of Secretogranin-3 OS=Mus musculus GN=Scg3 - [SCG3_MOUSE]                                                | 35.62 | 2   | 12 | 12 | 57  | 1.711  | 0.828 | 0.703 | 0.624 | 155.28  | 35.62 | 21 | 57  | 466  | 52.8  | 4.91  |

|          |                                                                                                          |       |   |    |    |     |        |       |       |       |        |       |    |     |      |       |      |
|----------|----------------------------------------------------------------------------------------------------------|-------|---|----|----|-----|--------|-------|-------|-------|--------|-------|----|-----|------|-------|------|
| Q9CQ40   | 39S ribosomal protein L49, mitochondrial OS=Mus musculus GN=Mp49 PE=2 SV=1 - [RM49_MOUSE]                | 33.73 | 1 | 5  | 5  | 12  | 2.730  | 0.998 | 0.733 | 0.624 | 34.13  | 33.73 | 7  | 12  | 166  | 19.1  | 9.50 |
| F6XR20   | Formin-like protein 2 (Fragment) OS=Mus musculus GN=Fmnl2 PE=4 SV=1 - [F6XR20_MOUSE]                     | 31.96 | 2 | 1  | 15 | 38  | 1.191  | 0.836 | 0.541 | 0.625 | 111.48 | 31.96 | 27 | 38  | 510  | 59.1  | 9.35 |
| D3Z5Q8   | Synaptotrophin (Fragment) OS=Mus musculus GN=Synpr PE=2 SV=1 - [D3Z5Q8_MOUSE]                            | 26.40 | 1 | 1  | 2  | 6   | 2.343  | 1.255 | 0.716 | 0.625 | 18.89  | 26.40 | 3  | 6   | 125  | 13.7  | 5.33 |
| Q80ZP8   | Armet protein OS=Mus musculus GN=Manf PE=2 SV=1 - [Q80ZP8_MOUSE]                                         | 55.76 | 7 | 12 | 12 | 52  | 1.162  | 0.771 | 0.785 | 0.626 | 154.92 | 55.76 | 21 | 52  | 165  | 19.0  | 8.13 |
| Q9EQF6   | Dihydropyrimidinase-related protein 5 OS=Mus musculus GN=Dpysl5 PE=1 SV=1 -                              | 71.10 | 2 | 36 | 36 | 334 | 0.683  | 0.435 | 0.509 | 0.626 | 983.16 | 71.10 | 63 | 334 | 564  | 61.5  | 7.09 |
| E9PZM4   | Protein Chd2 OS=Mus musculus GN=Chd2 PE=2 SV=1 - [E9PZM4_MOUSE]                                          | 2.96  | 3 | 3  | 4  | 5   | 1.419  | 1.284 | 0.855 | 0.626 | 9.13   | 2.96  | 5  | 5   | 1827 | 210.7 | 8.06 |
| Q6Z386   | Interleukin-17A OS=Mus musculus GN=Il17a PE=2 SV=1 - [IL17_MOUSE]                                        | 15.19 | 1 | 1  | 2  | 2   | 1.743  | 0.412 | 0.583 | 0.627 | 2.34   | 15.19 | 2  | 2   | 158  | 17.5  | 8.92 |
| P21460   | Cystatin-C OS=Mus musculus GN=Cst3 PE=2 SV=2 - [CYTC_MOUSE]                                              | 46.43 | 2 | 5  | 6  | 27  | 1.384  | 0.910 | 0.760 | 0.628 | 91.41  | 46.43 | 11 | 27  | 140  | 15.5  | 9.00 |
| Q8R0L9-3 | Isoform 3 of Transcriptional adapter 3 OS=Mus musculus GN=Tada3 -                                        | 23.72 | 3 | 3  | 3  | 5   | 1.595  | 0.900 | 1.300 | 0.628 | 12.71  | 23.72 | 4  | 5   | 156  | 17.7  | 8.00 |
| Q8K0X8   | Fasciculation and elongation protein zeta-1 OS=Mus musculus GN=Fez1 PE=1 SV=2 -                          | 26.79 | 5 | 9  | 9  | 28  | 1.448  | 0.745 | 0.892 | 0.628 | 88.66  | 26.79 | 14 | 28  | 392  | 45.2  | 4.36 |
| Q91X43   | SH3 domain-containing protein 19 OS=Mus musculus GN=Sh3d19 PE=1 SV=2 -                                   | 15.08 | 2 | 8  | 9  | 18  | 1.650  | 0.799 | 0.878 | 0.629 | 44.33  | 15.08 | 13 | 18  | 789  | 86.0  | 8.53 |
| Q9CQE1   | Protein NipSnap homolog 3B OS=Mus musculus GN=Nipsnap3b PE=1 SV=1 - [NFS3B_MOUSE]                        | 18.22 | 4 | 5  | 5  | 24  | 1.770  | 1.012 | 0.854 | 0.630 | 68.22  | 18.22 | 9  | 24  | 247  | 28.3  | 9.48 |
| Q3U0J8   | TBC1 domain family member 2B OS=Mus musculus GN=Tbcd2b PE=1 SV=2 -                                       | 4.15  | 2 | 3  | 4  | 5   | 0.918  | 1.120 | 0.634 | 0.630 | 14.16  | 4.15  | 5  | 5   | 965  | 109.9 | 6.02 |
| Q80Y14   | Glutaredoxin-related protein 5, mitochondrial OS=Mus musculus GN=Glx5 PE=2 SV=2 - [GLRX5_MOUSE]          | 31.58 | 1 | 4  | 5  | 51  | 2.300  | 0.622 | 0.913 | 0.631 | 143.17 | 31.58 | 9  | 51  | 152  | 16.3  | 6.55 |
| F6UK66   | Coiled-coil domain-containing protein 50 (Fragment) OS=Mus musculus GN=Ccdc50 PE=4 SV=1 -                | 18.36 | 4 | 4  | 5  | 12  | 1.285  | 0.479 | 0.919 | 0.631 | 31.79  | 18.36 | 8  | 12  | 256  | 29.8  | 6.67 |
| Q9DBK0   | Acyl-coenzyme A thioesterase 12 OS=Mus musculus GN=Acot12 PE=2 SV=1 -                                    | 1.80  | 1 | 1  | 1  | 2   | 12.316 | 1.836 | 0.853 | 0.631 | 3.34   | 1.80  | 2  | 2   | 556  | 61.7  | 7.18 |
| D3Z6H8   | S-adenosylmethionine decarboxylase proenzyme OS=Mus musculus GN=Am2 PE=3 SV=1 - [D3Z6H8_MOUSE]           | 2.40  | 2 | 1  | 1  | 2   | 1.700  | 1.031 | 1.018 | 0.632 | 5.57   | 2.40  | 2  | 2   | 334  | 38.3  | 6.42 |
| P81117   | Nucleobindin-2 OS=Mus musculus GN=Nucb2 PE=1 SV=2 - [NUCB2_MOUSE]                                        | 36.67 | 1 | 11 | 12 | 46  | 1.379  | 1.404 | 0.835 | 0.632 | 135.81 | 36.67 | 21 | 46  | 420  | 50.3  | 5.15 |
| Q6PGH2   | Hematological and neurological expressed 1-like protein OS=Mus musculus GN=Hn1l PE=2 SV=1 - [HN1L_MOUSE] | 41.05 | 2 | 6  | 6  | 30  | 3.235  | 0.521 | 0.609 | 0.632 | 86.45  | 41.05 | 12 | 30  | 190  | 20.0  | 8.62 |
| Q9JHP7-3 | Isoform 3 of KDEL motif-containing protein 1 OS=Mus musculus GN=Kdek1 -                                  | 9.93  | 4 | 2  | 2  | 3   | 2.088  | 0.816 | 0.434 | 0.633 | 6.57   | 9.93  | 2  | 3   | 282  | 32.1  | 7.77 |
| Q8BXA1   | Golgi integral membrane protein 4 OS=Mus musculus GN=Golim4 PE=1 SV=1 -                                  | 5.95  | 2 | 3  | 3  | 21  | 1.837  | 0.992 | 0.743 | 0.633 | 43.77  | 5.95  | 6  | 21  | 655  | 76.7  | 4.83 |
| Q8BG75   | Transmembrane protein 198 OS=Mus musculus GN=Tmem198 PE=2 SV=1 - [TM198_MOUSE]                           | 6.94  | 1 | 2  | 2  | 3   | 0.778  | 0.625 | 0.837 | 0.634 | 6.28   | 6.94  | 3  | 3   | 360  | 39.7  | 9.92 |
| Q9D9Q0   | Leucine-rich repeat-containing protein 69 OS=Mus musculus GN=Lrrc69 PE=2 SV=1 - [LRC69_MOUSE]            | 6.05  | 1 | 2  | 2  | 4   | 2.071  | 1.137 | 0.691 | 0.634 | 2.75   | 6.05  | 2  | 4   | 347  | 40.0  | 8.65 |
| Q61414   | Keratin, type I cytoskeletal 15 OS=Mus musculus GN=Krt15 PE=1 SV=2 - [K1C15_MOUSE]                       | 21.02 | 9 | 4  | 8  | 24  | 1.720  | 0.346 | 1.171 | 0.635 | 49.30  | 21.02 | 11 | 24  | 452  | 49.1  | 4.86 |
| F6THH9   | E3 ubiquitin-protein ligase MARCH8 (Fragment) OS=Mus musculus GN=March8 PE=2 SV=1 - [F6THH9_MOUSE]       | 6.83  | 2 | 1  | 1  | 2   | 1.161  | 0.772 | 0.716 | 0.635 | 7.44   | 6.83  | 2  | 2   | 249  | 28.2  | 8.22 |
| Q8CHT3   | Integrator complex subunit 5 OS=Mus musculus GN=Ints5 PE=2 SV=1 - [INT5_MOUSE]                           | 8.74  | 1 | 5  | 5  | 9   | 1.485  | 0.984 | 0.602 | 0.635 | 24.41  | 8.74  | 7  | 9   | 1018 | 108.3 | 7.06 |

|          |                                                                                                                     |       |   |    |    |    |       |       |       |       |        |       |    |    |      |       |       |
|----------|---------------------------------------------------------------------------------------------------------------------|-------|---|----|----|----|-------|-------|-------|-------|--------|-------|----|----|------|-------|-------|
| F2Z469   | Matrilin-4 OS=Mus musculus GN=Matn4 PE=2 SV=1 - [F2Z469_MOUSE]                                                      | 20.11 | 5 | 10 | 10 | 22 | 0.424 | 0.987 | 0.473 | 0.636 | 53.55  | 20.11 | 16 | 22 | 542  | 60.1  | 5.39  |
| Q68FE8-2 | Isoform 2 of Zinc finger protein 280D OS=Mus musculus GN=Znf280d - [Z280D_MOUSE]                                    | 4.07  | 2 | 3  | 3  | 5  | 0.649 | 0.740 | 0.925 | 0.636 | 9.36   | 4.07  | 5  | 5  | 787  | 88.4  | 8.53  |
| Q8VE42   | Ankyrin repeat domain-containing protein 49 OS=Mus musculus GN=Ankr49 PE=1 SV=1 - [ANR49_MOUSE]                     | 4.62  | 1 | 1  | 1  | 2  | 1.658 | 1.157 | 0.965 | 0.636 | 7.44   | 4.62  | 2  | 2  | 238  | 27.1  | 5.16  |
| P15261   | Interferon gamma receptor 1 OS=Mus musculus GN=Ifngr1 PE=1 SV=3 - [INGR1_MOUSE]                                     | 9.85  | 1 | 3  | 3  | 6  | 3.179 | 1.224 | 0.737 | 0.636 | 6.63   | 9.85  | 4  | 6  | 477  | 52.3  | 5.53  |
| Q8BGM5   | Bestrophin-2 OS=Mus musculus GN=Best2 PE=2 SV=1 - [BEST2_MOUSE]                                                     | 1.97  | 1 | 1  | 1  | 1  | 1.438 | 1.470 | 0.560 | 0.637 | 2.15   | 1.97  | 1  | 1  | 508  | 57.0  | 5.39  |
| F6SLR4   | Testican-2 OS=Mus musculus GN=Spock2 PE=4 SV=1 - [F6SLR4_MOUSE]                                                     | 33.10 | 2 | 13 | 13 | 30 | 0.929 | 0.538 | 0.833 | 0.637 | 79.89  | 33.10 | 19 | 30 | 423  | 46.8  | 4.98  |
| P50429   | Arylsulfatase B OS=Mus musculus GN=ArSB PE=2 SV=3 - [ARSB_MOUSE]                                                    | 18.91 | 3 | 10 | 10 | 55 | 1.229 | 0.965 | 0.718 | 0.638 | 112.86 | 18.91 | 18 | 55 | 534  | 59.6  | 7.24  |
| Q9QYL0   | Spermatid-specific linker histone H1-like protein OS=Mus musculus GN=Hils1 PE=1 SV=1 - [HILS1_MOUSE]                | 5.88  | 1 | 1  | 1  | 1  | 2.278 | 1.298 | 0.304 | 0.641 | 0.00   | 5.88  | 1  | 1  | 170  | 19.2  | 9.94  |
| Q8BHK1   | Magnesium transporter NIPA1 OS=Mus musculus GN=Nipa1 PE=1 SV=1 - [NIPA1_MOUSE]                                      | 1.86  | 1 | 1  | 1  | 1  | 0.486 | 1.291 | 0.841 | 0.642 | 2.24   | 1.86  | 1  | 1  | 323  | 34.1  | 8.37  |
| Q9WVB4   | Slit homolog 3 protein OS=Mus musculus GN=Slit3 PE=2 SV=2 - [SLIT3_MOUSE]                                           | 0.98  | 1 | 1  | 2  | 2  | 0.701 | 0.791 | 0.936 | 0.643 | 5.39   | 0.98  | 2  | 2  | 1523 | 167.6 | 7.62  |
| Q80UK0   | SEC14 domain and spectrin repeat-containing protein 1 OS=Mus musculus GN=Sestd1 PE=2 SV=1 - [SESTD1_MOUSE]          | 26.44 | 1 | 14 | 15 | 44 | 0.646 | 1.059 | 0.820 | 0.643 | 143.11 | 26.44 | 26 | 44 | 696  | 79.3  | 5.10  |
| Q8QZR8   | Cyclin-related protein FAM58B OS=Mus musculus GN=Fam58b PE=2 SV=2 - [FAM58B_MOUSE]                                  | 4.00  | 1 | 1  | 1  | 1  | 3.229 | 0.917 | 0.453 | 0.644 | 2.71   | 4.00  | 1  | 1  | 250  | 28.9  | 6.28  |
| P07091   | Protein S100-A4 OS=Mus musculus GN=S100a4 PE=1 SV=1 - [S100A4_MOUSE]                                                | 7.92  | 1 | 1  | 1  | 2  | 1.375 | 1.393 | 0.667 | 0.644 | 3.80   | 7.92  | 2  | 2  | 101  | 11.7  | 5.31  |
| Q8BHC4   | Dephospho-CoA kinase domain-containing protein OS=Mus musculus GN=DcaKd PE=2 SV=1 - [DCAKD_MOUSE]                   | 42.86 | 2 | 8  | 8  | 31 | 0.765 | 0.681 | 0.559 | 0.645 | 106.20 | 42.86 | 15 | 31 | 231  | 26.5  | 9.58  |
| Q8C3R1   | BRCA1-associated ATM activator 1 OS=Mus musculus GN=Brat1 PE=2 SV=1 - [BRAT1_MOUSE]                                 | 7.54  | 4 | 4  | 4  | 7  | 3.653 | 0.919 | 1.033 | 0.645 | 21.13  | 7.54  | 6  | 7  | 822  | 89.0  | 5.31  |
| P28867   | Protein kinase C delta type OS=Mus musculus GN=Prkcd PE=1 SV=3 - [KPCD_MOUSE]                                       | 39.17 | 6 | 21 | 24 | 93 | 0.636 | 0.329 | 0.602 | 0.646 | 215.41 | 39.17 | 43 | 93 | 674  | 77.5  | 7.39  |
| Q3TVI8   | Pre-B-cell leukemia transcription factor-interacting protein 1 OS=Mus musculus GN=Pbxip1 PE=1 SV=2 - [PBXIP1_MOUSE] | 11.69 | 2 | 6  | 6  | 11 | 1.023 | 1.054 | 0.698 | 0.646 | 27.32  | 11.69 | 9  | 11 | 727  | 81.1  | 5.36  |
| O35153   | BET1-like protein OS=Mus musculus GN=Bett1 PE=3 SV=1 - [BET1L_MOUSE]                                                | 11.71 | 1 | 1  | 1  | 7  | 0.743 | 0.829 | 0.771 | 0.649 | 22.39  | 11.71 | 2  | 7  | 111  | 12.4  | 8.82  |
| Q9CQ01   | Ribonuclease T2 OS=Mus musculus GN=Rnaset2 PE=2 SV=1 - [RNT2_MOUSE]                                                 | 20.85 | 1 | 5  | 5  | 10 | 1.211 | 0.867 | 0.811 | 0.649 | 23.15  | 20.85 | 7  | 10 | 259  | 29.6  | 6.37  |
| Q8VC57   | BTB/POZ domain-containing protein KCTD5 OS=Mus musculus GN=Kctd5 PE=2 SV=1 - [KCTD5_MOUSE]                          | 20.09 | 1 | 3  | 3  | 5  | 1.448 | 1.035 | 0.830 | 0.649 | 15.68  | 20.09 | 4  | 5  | 234  | 26.1  | 5.95  |
| Q0P5V2   | Sine oculis-binding protein homolog OS=Mus musculus GN=Sobp PE=2 SV=1 - [SOBP_MOUSE]                                | 0.81  | 1 | 1  | 1  | 2  | 0.612 | 1.154 | 1.149 | 0.650 | 2.52   | 0.81  | 2  | 2  | 864  | 91.7  | 7.97  |
| P16254   | Signal recognition particle 14 kDa protein OS=Mus musculus GN=Srp14 PE=1 SV=1 - [SRP14_MOUSE]                       | 27.27 | 2 | 3  | 3  | 7  | 1.433 | 0.553 | 0.682 | 0.651 | 14.41  | 27.27 | 5  | 7  | 110  | 12.5  | 10.17 |
| D3YVV9   | Synaptopodin-2 OS=Mus musculus GN=Synpo2 PE=2 SV=1 - [D3YVV9_MOUSE]                                                 | 26.21 | 5 | 21 | 21 | 62 | 0.609 | 0.742 | 0.820 | 0.651 | 170.35 | 26.21 | 34 | 62 | 1198 | 129.5 | 7.81  |
| P52479-2 | Isoform 2 of Ubiquitin carboxyl-terminal hydrolase 10 OS=Mus musculus GN=Usp10 - [UBP10_MOUSE]                      | 34.68 | 3 | 1  | 21 | 76 | 1.957 | 1.506 | 0.957 | 0.651 | 207.72 | 34.68 | 37 | 76 | 793  | 87.0  | 5.17  |
| Q99JP6-2 | Isoform 2 of Homer protein homolog 3 OS=Mus musculus GN=Homer3 - [HOMER3_MOUSE]                                     | 22.56 | 3 | 3  | 9  | 21 | 1.496 | 0.580 | 1.945 | 0.651 | 51.05  | 22.56 | 16 | 21 | 359  | 40.0  | 5.29  |

|          |                                                                                                                |       |   |    |    |     |        |       |       |       |        |       |    |     |      |       |       |
|----------|----------------------------------------------------------------------------------------------------------------|-------|---|----|----|-----|--------|-------|-------|-------|--------|-------|----|-----|------|-------|-------|
| Q6PAM1   | Alpha-taxilin OS=Mus musculus GN=Txlna PE=2 SV=1 - [TXLNA_MOUSE]                                               | 25.81 | 9 | 13 | 14 | 38  | 1.895  | 0.546 | 0.951 | 0.651 | 115.62 | 25.81 | 25 | 38  | 554  | 62.3  | 6.74  |
| Q5S006   | Leucine-rich repeat serine/threonine-protein kinase 2 OS=Mus musculus GN=Lrrk2 PE=1 SV=2 - [LRRK2_MOUSE]       | 3.17  | 1 | 4  | 6  | 9   | 1.950  | 2.235 | 0.941 | 0.651 | 17.38  | 3.17  | 7  | 9   | 2527 | 284.5 | 6.83  |
| F7B398   | Protein Nbeal1 (Fragment) OS=Mus musculus GN=Nbeal1 PE=2 SV=1 - [F7B398_MOUSE]                                 | 3.81  | 2 | 3  | 3  | 4   | 14.626 | 2.464 | 1.006 | 0.651 | 5.00   | 3.81  | 3  | 4   | 734  | 85.2  | 5.25  |
| P09803   | Cadherin-1 OS=Mus musculus GN=Cdh1 PE=1 SV=1 - [CADH1_MOUSE]                                                   | 9.73  | 1 | 4  | 4  | 15  | 6.268  | 3.331 | 0.780 | 0.652 | 34.75  | 9.73  | 7  | 15  | 884  | 98.2  | 4.83  |
| Q9QY40   | Plexin-B3 OS=Mus musculus GN=Plxb3 PE=1 SV=2 - [PLXB3_MOUSE]                                                   | 2.73  | 1 | 2  | 6  | 23  | 1.005  | 0.341 | 0.622 | 0.652 | 56.51  | 2.73  | 10 | 23  | 1902 | 208.2 | 5.95  |
| Q9CR56   | NF-kappa-B inhibitor-interacting Ras-like protein 2 OS=Mus musculus GN=Nkiras2 PE=2 SV=1 - [KBRS2_MOUSE]       | 19.37 | 2 | 4  | 4  | 6   | 0.872  | 0.770 | 0.754 | 0.652 | 17.35  | 19.37 | 5  | 6   | 191  | 21.5  | 8.05  |
| D3Z7F1   | Cytochrome P450 251 OS=Mus musculus GN=Cyp251 PE=2 SV=1 - [D3Z7F1_MOUSE]                                       | 20.98 | 3 | 8  | 8  | 17  | 1.107  | 0.640 | 1.139 | 0.653 | 57.54  | 20.98 | 14 | 17  | 448  | 49.8  | 9.19  |
| P49962   | Signal recognition particle 9 kDa protein OS=Mus musculus GN=Srp9 PE=1 SV=2 - [SRP09_MOUSE]                    | 40.70 | 2 | 4  | 4  | 8   | 1.977  | 0.801 | 0.773 | 0.654 | 21.14  | 40.70 | 6  | 8   | 86   | 10.2  | 7.99  |
| A6PWD2   | Forkhead-associated domain-containing protein 1 OS=Mus musculus GN=Fhad1 PE=2 SV=1 - [FHAD1_MOUSE]             | 3.59  | 3 | 4  | 5  | 6   | 7.151  | 1.845 | 1.450 | 0.654 | 8.78   | 3.59  | 5  | 6   | 1420 | 163.6 | 6.64  |
| Q9Z1M8   | Protein Red OS=Mus musculus GN=Ik PE=2 SV=2 - [RED_MOUSE]                                                      | 7.18  | 1 | 4  | 4  | 14  | 0.691  | 0.568 | 0.954 | 0.655 | 38.91  | 7.18  | 7  | 14  | 557  | 65.6  | 6.64  |
| Q3UX37   | Protein Plekhg1 OS=Mus musculus GN=Plekhg1 PE=2 SV=1 - [Q3UX37_MOUSE]                                          | 18.27 | 4 | 22 | 23 | 52  | 0.576  | 0.370 | 0.624 | 0.655 | 143.72 | 18.27 | 34 | 52  | 1390 | 155.8 | 6.40  |
| Q9DBY8   | Nuclear valosin-containing protein-like OS=Mus musculus GN=Nvl PE=1 SV=1 - [NVL_MOUSE]                         | 10.53 | 1 | 7  | 7  | 12  | 0.985  | 0.761 | 0.700 | 0.655 | 27.16  | 10.53 | 10 | 12  | 855  | 94.4  | 6.35  |
| O89017   | Legumain OS=Mus musculus GN=Lgmn PE=1 SV=1 - [LGMN_MOUSE]                                                      | 8.51  | 1 | 4  | 4  | 14  | 1.715  | 0.605 | 0.808 | 0.655 | 43.76  | 8.51  | 6  | 14  | 435  | 49.3  | 6.39  |
| Q80W41   | Condensin-2 complex subunit D3 OS=Mus musculus GN=Ncapd3 PE=2 SV=1 - [NCPAD3_MOUSE]                            | 1.55  | 3 | 2  | 2  | 2   | 1.365  | 1.633 | 1.364 | 0.655 | 2.09   | 1.55  | 2  | 2   | 1223 | 139.0 | 7.11  |
| P09581   | Macrophage colony-stimulating factor 1 receptor OS=Mus musculus GN=Csf1r PE=1 SV=3 - [CSF1R_MOUSE]             | 0.82  | 1 | 1  | 1  | 1   | 1.350  | 1.058 | 1.126 | 0.657 | 2.92   | 0.82  | 1  | 1   | 977  | 109.1 | 6.21  |
| Q9DCD6   | Gamma-aminobutyric acid receptor-associated protein OS=Mus musculus GN=Gabarap PE=1 SV=2 - [GBRAP_MOUSE]       | 39.32 | 2 | 2  | 6  | 14  | 1.334  | 0.610 | 0.678 | 0.657 | 48.01  | 39.32 | 8  | 14  | 117  | 13.9  | 8.79  |
| Q62393-3 | Isoform 3 of Tumor protein D52 OS=Mus musculus GN=Tpd52 [TPD52_MOUSE]                                          | 52.76 | 9 | 12 | 12 | 57  | 1.333  | 0.739 | 0.849 | 0.657 | 180.78 | 52.76 | 20 | 57  | 199  | 21.6  | 5.03  |
| Q8CJ27   | Abnormal spindle-like microcephaly-associated protein homolog OS=Mus musculus GN=Aspm PE=2 SV=2 - [ASPM_MOUSE] | 1.28  | 2 | 4  | 5  | 22  | 1.054  | 1.130 | 0.924 | 0.658 | 38.38  | 1.28  | 8  | 22  | 3122 | 364.0 | 10.62 |
| Q8BP99   | UPF0500 protein Clorf216 homolog OS=Mus musculus PE=2 SV=2 - [CA216_MOUSE]                                     | 10.43 | 1 | 1  | 2  | 2   | 1.860  | 0.932 | 0.680 | 0.658 | 8.21   | 10.43 | 2  | 2   | 230  | 25.2  | 5.30  |
| Q60865   | Caprin-1 OS=Mus musculus GN=Caprin1 PE=1 SV=2 - [CAPR1_MOUSE]                                                  | 26.73 | 4 | 14 | 14 | 91  | 1.383  | 0.757 | 0.880 | 0.658 | 230.32 | 26.73 | 21 | 91  | 707  | 78.1  | 5.25  |
| Q059P4   | Filamin A interacting protein 1 OS=Mus musculus GN=Filip1 PE=2 SV=1 - [Q059P4_MOUSE]                           | 5.77  | 3 | 4  | 5  | 11  | 2.207  | 2.204 | 1.320 | 0.658 | 26.76  | 5.77  | 7  | 11  | 1214 | 137.8 | 8.19  |
| Q792Y8   | MCG15081 OS=Mus musculus GN=Gm10334 PE=3 SV=1 - [Q792Y8_MOUSE]                                                 | 12.20 | 3 | 1  | 2  | 23  | 0.584  | 0.990 | 1.201 | 0.659 | 44.33  | 12.20 | 3  | 23  | 246  | 26.1  | 4.92  |
| Q9R257   | Heme-binding protein 1 OS=Mus musculus GN=Hebp1 PE=1 SV=2 - [HEBP1_MOUSE]                                      | 69.47 | 1 | 9  | 9  | 50  | 1.113  | 2.150 | 1.412 | 0.659 | 128.58 | 69.47 | 17 | 50  | 190  | 21.1  | 5.26  |
| Q8R4P9-2 | Isoform 2 of Multidrug resistance-associated protein 7 OS=Mus musculus GN=Abcc10 - [MRP7_MOUSE]                | 1.99  | 4 | 2  | 2  | 3   | 1.104  | 0.758 | 0.677 | 0.659 | 7.58   | 1.99  | 3  | 3   | 1460 | 159.5 | 7.37  |
| Q8CJ40-2 | Isoform 2 of Rootletin OS=Mus musculus GN=Crocc - [CROCC_MOUSE]                                                | 34.74 | 3 | 1  | 58 | 162 | 2.320  | 1.463 | 0.727 | 0.660 | 502.72 | 34.74 | 99 | 162 | 1845 | 208.1 | 5.53  |
| B9EKI3   | TATA element modulatory factor OS=Mus musculus GN=Tmf1 PE=1 SV=2 - [TMF1_MOUSE]                                | 18.15 | 2 | 18 | 18 | 33  | 1.767  | 0.792 | 1.058 | 0.660 | 85.01  | 18.15 | 28 | 33  | 1091 | 121.7 | 4.87  |

|          |                                                                                                              |       |    |    |    |     |        |       |       |       |        |       |    |     |      |       |       |
|----------|--------------------------------------------------------------------------------------------------------------|-------|----|----|----|-----|--------|-------|-------|-------|--------|-------|----|-----|------|-------|-------|
| P63300   | Selenoprotein W OS=Mus musculus GN=Sepw1 PE=1 SV=3 - [SELW_MOUSE]                                            | 7.95  | 1  | 1  | 1  | 3   | 0.728  | 0.675 | 0.622 | 0.661 | 8.85   | 7.95  | 2  | 3   | 88   | 9.7   | 8.72  |
| B1AVH0   | Matrix metalloproteinase-16 (Fragment) OS=Mus musculus GN=Mmp16 PE=2 SV=1 - [B1AVH0_MOUSE]                   | 8.05  | 1  | 1  | 1  | 1   | 45.234 | 3.265 | 1.562 | 0.661 | 2.98   | 8.05  | 1  | 1   | 174  | 19.7  | 9.60  |
| Q8K284-2 | Isoform 2 of General transcription factor 3C polypeptide 1 OS=Mus musculus GN=Gtf3c1 - [TF3C1_MOUSE]         | 5.84  | 3  | 10 | 10 | 15  | 0.707  | 0.735 | 0.743 | 0.661 | 41.37  | 5.84  | 12 | 15  | 2005 | 226.6 | 7.59  |
| P62071   | Ras-related protein R-Ras2 OS=Mus musculus GN=Rras2 PE=1 SV=1 - [RRAS2_MOUSE]                                | 60.78 | 1  | 9  | 12 | 74  | 0.893  | 0.440 | 0.669 | 0.661 | 202.83 | 60.78 | 23 | 74  | 204  | 23.4  | 6.01  |
| Q8R105   | Vacuolar protein sorting-associated protein 37C OS=Mus musculus GN=Vps37c PE=2 SV=1 - [VP37C_MOUSE]          | 28.69 | 2  | 9  | 9  | 35  | 1.734  | 0.902 | 0.874 | 0.662 | 116.26 | 28.69 | 15 | 35  | 352  | 38.4  | 5.31  |
| Q8VH13   | GDP-fucose protein O-fucosyltransferase 2 OS=Mus musculus GN=Pofut2 PE=1 SV=1 - [OFUT2_MOUSE]                | 8.86  | 1  | 4  | 4  | 7   | 1.862  | 1.023 | 0.740 | 0.662 | 16.26  | 8.86  | 6  | 7   | 429  | 49.4  | 6.48  |
| Q64519   | Syndecan-3 OS=Mus musculus GN=Sdc3 PE=2 SV=2 - [SDC3_MOUSE]                                                  | 7.92  | 1  | 2  | 2  | 12  | 0.416  | 0.920 | 0.628 | 0.662 | 17.57  | 7.92  | 3  | 12  | 442  | 46.0  | 4.59  |
| G5E887   | Lebercilin OS=Mus musculus GN=Lca5 PE=4 SV=1 - [G5E887_MOUSE]                                                | 5.49  | 5  | 1  | 3  | 7   | 0.792  | 0.849 | 0.970 | 0.662 | 12.54  | 5.49  | 4  | 7   | 419  | 48.4  | 9.06  |
| Q6P549   | Phosphatidylinositol 3,4,5-trisphosphate 5-phosphatase 2 OS=Mus musculus GN=Inpp1 PE=1 SV=1 - [INPP1_MOUSE]  | 8.19  | 1  | 6  | 7  | 20  | 0.983  | 0.650 | 0.626 | 0.663 | 53.95  | 8.19  | 12 | 20  | 1257 | 138.9 | 6.54  |
| E9P267   | Calsequestrin (Fragment) OS=Mus musculus GN=Casq2 PE=2 SV=1 - [E9P267_MOUSE]                                 | 8.65  | 3  | 2  | 2  | 3   | 5.438  | 2.156 | 1.416 | 0.663 | 6.45   | 8.65  | 3  | 3   | 312  | 36.4  | 4.58  |
| P18608   | Non-histone chromosomal protein HMG-14 OS=Mus musculus GN=Hmg1 PE=1 SV=2 - [HMG1_MOUSE]                      | 18.75 | 2  | 3  | 3  | 13  | 0.853  | 0.621 | 0.852 | 0.663 | 28.57  | 18.75 | 5  | 13  | 96   | 10.1  | 9.76  |
| D3Z598   | Latent-transforming growth factor beta-binding protein 4 OS=Mus musculus GN=Ltbp4 PE=2 SV=1 - [D3Z598_MOUSE] | 7.45  | 7  | 9  | 9  | 19  | 0.813  | 1.317 | 0.707 | 0.663 | 62.52  | 7.45  | 17 | 19  | 1558 | 166.7 | 5.11  |
| D3Z1W6   | Protein polybromo-1 OS=Mus musculus GN=Pbrm1 PE=2 SV=1 - [D3Z1W6_MOUSE]                                      | 4.17  | 13 | 6  | 6  | 7   | 0.585  | 0.764 | 0.917 | 0.664 | 25.48  | 4.17  | 7  | 7   | 1582 | 181.0 | 6.95  |
| P36552   | Coproporphyrinogen-III oxidase, mitochondrial OS=Mus musculus GN=Cpox PE=1 SV=2 - [HEM6_MOUSE]               | 39.73 | 1  | 14 | 14 | 66  | 2.236  | 0.623 | 0.575 | 0.664 | 207.14 | 39.73 | 28 | 66  | 443  | 49.7  | 8.53  |
| Q5RUY2   | G2/M phase-specific E3 ubiquitin-protein ligase OS=Mus musculus GN=G2e3 PE=2 SV=2 - [G2E3_MOUSE]             | 1.40  | 2  | 1  | 1  | 1   | 0.682  | 0.843 | 1.019 | 0.664 | 0.00   | 1.40  | 1  | 1   | 716  | 81.7  | 7.37  |
| Q9JJ18   | 60S ribosomal protein L38 OS=Mus musculus GN=Rpl38 PE=2 SV=3 - [RL38_MOUSE]                                  | 50.00 | 1  | 4  | 5  | 17  | 0.963  | 0.602 | 0.770 | 0.664 | 42.91  | 50.00 | 7  | 17  | 70   | 8.2   | 10.10 |
| P51655   | Glypican-4 OS=Mus musculus GN=Gpc4 PE=2 SV=2 - [GPC4_MOUSE]                                                  | 34.65 | 1  | 14 | 16 | 43  | 0.571  | 2.821 | 0.705 | 0.664 | 112.03 | 34.65 | 28 | 43  | 557  | 62.5  | 6.33  |
| Q8CAY6   | Acetyl-CoA acetyltransferase, cytosolic OS=Mus musculus GN=Acat2 PE=1 SV=2 - [TH1C_MOUSE]                    | 58.69 | 2  | 3  | 17 | 204 | 1.628  | 0.788 | 0.643 | 0.664 | 649.38 | 58.69 | 29 | 204 | 397  | 41.3  | 7.50  |
| A2AQ53   | Fibrillin-1 OS=Mus musculus GN=Fbn1 PE=4 SV=1 - [A2AQ53_MOUSE]                                               | 5.01  | 2  | 13 | 16 | 27  | 0.803  | 3.896 | 0.516 | 0.665 | 66.65  | 5.01  | 21 | 27  | 2873 | 312.1 | 4.92  |
| E9Q8L9   | Rab11 family-interacting protein 1 OS=Mus musculus GN=Rab11fp1 PE=2 SV=1 - [RAB11FP1_MOUSE]                  | 10.12 | 2  | 6  | 7  | 8   | 3.244  | 1.366 | 0.998 | 0.665 | 22.38  | 10.12 | 8  | 8   | 1166 | 124.9 | 5.80  |
| Q35295   | Transcriptional activator protein Pur-beta OS=Mus musculus GN=Purb PE=1 SV=3 - [PURB_MOUSE]                  | 62.65 | 1  | 11 | 18 | 67  | 1.096  | 0.803 | 0.745 | 0.665 | 223.27 | 62.65 | 27 | 67  | 324  | 33.9  | 5.43  |
| F7AA26   | Protein Gm20459 (Fragment) OS=Mus musculus GN=Gm20459 PE=4 SV=1 - [Gm20459_MOUSE]                            | 26.47 | 6  | 1  | 26 | 130 | 0.717  | 0.352 | 0.795 | 0.666 | 373.54 | 26.47 | 45 | 130 | 1137 | 126.0 | 5.27  |
| A2BE93   | Protein SET (Fragment) OS=Mus musculus GN=Set PE=2 SV=1 - [A2BE93_MOUSE]                                     | 32.56 | 5  | 8  | 8  | 66  | 1.356  | 0.779 | 0.958 | 0.666 | 181.82 | 32.56 | 14 | 66  | 215  | 24.9  | 5.55  |
| Q5U5I3   | 28S ribosomal protein S18a, mitochondrial OS=Mus musculus GN=Mrps18a PE=2 SV=1 - [Q5U5I3_MOUSE]              | 21.94 | 3  | 4  | 4  | 5   | 0.443  | 0.537 | 0.773 | 0.667 | 7.49   | 21.94 | 4  | 5   | 196  | 22.2  | 10.11 |

|          |                                                                                                                        |       |   |    |    |     |       |       |       |       |        |       |    |     |      |       |       |
|----------|------------------------------------------------------------------------------------------------------------------------|-------|---|----|----|-----|-------|-------|-------|-------|--------|-------|----|-----|------|-------|-------|
| P97376   | Protein FRG1 OS=Mus musculus GN=FrG1 PE=1 SV=2 - [FRG1_MOUSE]                                                          | 4.26  | 1 | 1  | 1  | 1   | 1.684 | 0.742 | 1.201 | 0.667 | 3.77   | 4.26  | 1  | 1   | 258  | 29.1  | 8.92  |
| O88811   | Signal transducing adapter molecule 2 OS=Mus musculus GN=Stam2 PE=1 SV=1 - [STAM2_MOUSE]                               | 29.06 | 3 | 12 | 14 | 28  | 1.638 | 1.107 | 0.936 | 0.667 | 74.29  | 29.06 | 19 | 28  | 523  | 57.4  | 5.07  |
| P62500-2 | Isoform 2 of TSC22 domain family protein 1 OS=Mus musculus GN=Tsc22d1 -                                                | 34.27 | 4 | 1  | 5  | 42  | 0.792 | 1.517 | 0.879 | 0.668 | 93.67  | 34.27 | 10 | 42  | 143  | 15.6  | 5.20  |
| E9QK04   | Neogenin OS=Mus musculus GN=Neo1 PE=2 SV=1 - [E9QK04_MOUSE]                                                            | 26.54 | 5 | 2  | 31 | 147 | 2.364 | 1.178 | 1.157 | 0.668 | 464.15 | 26.54 | 52 | 147 | 1492 | 162.8 | 6.49  |
| P41317   | Mannose-binding protein C OS=Mus musculus GN=Mbl2 PE=2 SV=2 - [MBL2_MOUSE]                                             | 12.30 | 1 | 2  | 2  | 4   | 2.261 | 1.309 | 0.386 | 0.669 | 14.70  | 12.30 | 4  | 4   | 244  | 25.9  | 5.06  |
| Q99PG2-2 | Isoform 2 of Opioid growth factor receptor OS=Mus musculus GN=Ogfr - [OGFR_MOUSE]                                      | 21.78 | 2 | 10 | 10 | 37  | 1.003 | 1.064 | 0.818 | 0.669 | 109.23 | 21.78 | 19 | 37  | 597  | 66.7  | 4.84  |
| Q8C156   | Condensin complex subunit 2 OS=Mus musculus GN=Ncaph PE=2 SV=1 - [CND2_MOUSE]                                          | 0.96  | 1 | 1  | 1  | 1   | 0.492 | 0.559 | 0.530 | 0.669 | 1.75   | 0.96  | 1  | 1   | 731  | 82.3  | 4.96  |
| O35309   | N-myc-interactor OS=Mus musculus GN=Nmi PE=2 SV=1 - [NMI_MOUSE]                                                        | 5.10  | 1 | 1  | 1  | 2   | 1.206 | 0.938 | 0.561 | 0.669 | 4.63   | 5.10  | 2  | 2   | 314  | 35.2  | 5.05  |
| Q8R034   | Anaphase-promoting complex subunit 13 OS=Mus musculus GN=Anapc13 PE=2 SV=1 - [APC13_MOUSE]                             | 13.51 | 1 | 1  | 1  | 2   | 2.517 | 0.943 | 1.060 | 0.670 | 6.57   | 13.51 | 2  | 2   | 74   | 8.3   | 4.18  |
| A2ALK8   | Tyrosine-protein phosphatase non-receptor type 3 OS=Mus musculus GN=Ptpn3 PE=2 SV=1 - [PTN3_MOUSE]                     | 1.64  | 1 | 2  | 2  | 3   | 0.459 | 0.953 | 0.853 | 0.671 | 5.00   | 1.64  | 3  | 3   | 913  | 103.8 | 7.20  |
| P23953   | Carboxylesterase 1C OS=Mus musculus GN=Ces1c PE=1 SV=4 - [EST1C_MOUSE]                                                 | 40.79 | 2 | 10 | 16 | 65  | 2.877 | 1.172 | 0.341 | 0.671 | 201.19 | 40.79 | 25 | 65  | 554  | 61.0  | 5.06  |
| H7BWX9   | Small ubiquitin-related modifier 2 OS=Mus musculus GN=Sumo2 PE=2 SV=1 -                                                | 49.06 | 4 | 2  | 3  | 14  | 1.413 | 1.066 | 1.263 | 0.671 | 47.63  | 49.06 | 4  | 14  | 53   | 6.0   | 8.91  |
| E9Q2W9   | Alpha-actinin-4 (Fragment) OS=Mus musculus GN=Actn4 PE=2 SV=1 - [E9Q2W9_MOUSE]                                         | 70.27 | 2 | 1  | 32 | 224 | 0.688 | 2.578 | 1.151 | 0.671 | 581.39 | 70.27 | 57 | 224 | 518  | 59.9  | 6.01  |
| D3Z5X2   | RAC-beta serine/threonine-protein kinase (Fragment) OS=Mus musculus GN=Akt2 PE=2 SV=1 - [D3Z5X2_MOUSE]                 | 9.38  | 1 | 1  | 1  | 3   | 2.226 | 2.443 | 1.602 | 0.671 | 5.78   | 9.38  | 1  | 3   | 64   | 7.8   | 7.30  |
| P26645   | Myristoylated alanine-rich C-kinase substrate OS=Mus musculus GN=Marcks PE=1 SV=2 - [MARCS_MOUSE]                      | 23.95 | 1 | 4  | 4  | 55  | 0.760 | 0.400 | 0.696 | 0.671 | 160.29 | 23.95 | 6  | 55  | 309  | 29.6  | 4.34  |
| J3KMU3   | Uncharacterized protein OS=Mus musculus GN=Gm2058 PE=3 SV=1 - [J3KMU3_MOUSE]                                           | 22.95 | 4 | 5  | 5  | 13  | 1.034 | 0.978 | 0.722 | 0.672 | 40.00  | 22.95 | 8  | 13  | 183  | 20.7  | 4.68  |
| D3Z564   | TGF-beta-activated kinase 1 and MAP3K7-binding protein 2 (Fragment) OS=Mus musculus GN=Tab2 PE=2 SV=1 - [D3Z564_MOUSE] | 11.43 | 3 | 3  | 3  | 8   | 1.345 | 0.921 | 1.005 | 0.672 | 25.71  | 11.43 | 4  | 8   | 385  | 41.3  | 10.39 |
| G5E920   | MCG114640 OS=Mus musculus GN=Gm6104 PE=4 SV=1 - [G5E920_MOUSE]                                                         | 29.50 | 3 | 7  | 7  | 18  | 0.570 | 0.416 | 0.889 | 0.672 | 51.48  | 29.50 | 9  | 18  | 200  | 23.0  | 8.37  |
| E9PW16   | GRIP and coiled-coil domain-containing protein 2 OS=Mus musculus GN=Gcc2 PE=2 SV=1 - [E9PW16_MOUSE]                    | 32.91 | 6 | 48 | 48 | 120 | 1.692 | 0.979 | 1.045 | 0.672 | 365.89 | 32.91 | 80 | 120 | 1644 | 190.6 | 5.12  |
| P62858   | 40S ribosomal protein S28 OS=Mus musculus GN=Rps28 PE=2 SV=1 - [RS28_MOUSE]                                            | 44.93 | 3 | 3  | 3  | 88  | 2.090 | 0.653 | 0.908 | 0.673 | 244.29 | 44.93 | 5  | 88  | 69   | 7.8   | 10.70 |
| P63158   | High mobility group protein B1 OS=Mus musculus GN=Hingb1 PE=1 SV=2 -                                                   | 43.72 | 3 | 15 | 16 | 101 | 0.493 | 0.494 | 0.986 | 0.673 | 265.51 | 43.72 | 26 | 101 | 215  | 24.9  | 5.74  |
| Q9ET43   | Claudin-12 OS=Mus musculus GN=Cldn12 PE=1 SV=2 - [CLD12_MOUSE]                                                         | 6.15  | 1 | 1  | 1  | 2   | 1.639 | 2.290 | 1.069 | 0.673 | 6.04   | 6.15  | 2  | 2   | 244  | 27.0  | 8.47  |
| Q9ERGO   | LIM domain and actin-binding protein 1 OS=Mus musculus GN=Lima1 PE=1 SV=3 - [LIMA1_MOUSE]                              | 18.46 | 2 | 13 | 13 | 36  | 1.713 | 0.766 | 0.800 | 0.673 | 92.58  | 18.46 | 21 | 36  | 753  | 84.0  | 6.60  |
| P60761   | Neurogranin OS=Mus musculus GN=Nirgn PE=1 SV=1 - [NEUG_MOUSE]                                                          | 46.15 | 1 | 3  | 4  | 70  | 0.675 | 1.438 | 2.343 | 0.673 | 173.62 | 46.15 | 7  | 70  | 78   | 7.5   | 7.05  |
| Q8K3C3   | Protein LZIC OS=Mus musculus GN=Lzic PE=1 SV=1 - [LZIC_MOUSE]                                                          | 45.26 | 2 | 6  | 8  | 24  | 1.700 | 0.728 | 0.865 | 0.673 | 76.65  | 45.26 | 12 | 24  | 190  | 21.5  | 4.96  |

|          |                                                                                                                 |       |    |    |    |     |       |       |       |       |        |       |    |     |      |       |       |
|----------|-----------------------------------------------------------------------------------------------------------------|-------|----|----|----|-----|-------|-------|-------|-------|--------|-------|----|-----|------|-------|-------|
| E9Q585   | Protein Slc41a1ap OS=Mus musculus GN=Slc41a1ap PE=2 SV=1 - [E9Q585_MOUSE]                                       | 10.07 | 3  | 6  | 6  | 12  | 1.275 | 0.879 | 0.823 | 0.674 | 25.95  | 10.07 | 9  | 12  | 715  | 79.6  | 5.10  |
| Q3UCQ1   | Forkhead box protein K2 OS=Mus musculus GN=Foxk2 PE=2 SV=3 - [FOXK2_MOUSE]                                      | 14.90 | 2  | 6  | 6  | 14  | 1.856 | 1.108 | 0.966 | 0.674 | 43.59  | 14.90 | 9  | 14  | 651  | 68.4  | 9.51  |
| Q8K341-4 | Isoform 4 of Alpha-tubulin N-acetyltransferase OS=Mus musculus GN=Atat1 - [ATAT1_MOUSE]                         | 43.24 | 9  | 13 | 13 | 57  | 0.787 | 0.683 | 0.736 | 0.674 | 176.08 | 43.24 | 26 | 57  | 333  | 37.5  | 10.10 |
| Q9ERR7   | 15 kDa selenoprotein OS=Mus musculus GN=Sep15 PE=1 SV=3 - [SEP15_MOUSE]                                         | 30.86 | 2  | 4  | 4  | 18  | 1.179 | 1.043 | 0.697 | 0.675 | 55.09  | 30.86 | 8  | 18  | 162  | 17.8  | 5.35  |
| Q8RIU2   | Cell growth regulator with EF hand domain protein 1 OS=Mus musculus GN=Cgref1 PE=2 SV=1 - [CGRE1_MOUSE]         | 10.32 | 2  | 2  | 2  | 7   | 1.492 | 0.824 | 0.813 | 0.675 | 25.44  | 10.32 | 4  | 7   | 281  | 30.8  | 4.31  |
| Q99JP4   | Anaphase-promoting complex subunit CDC26 OS=Mus musculus GN=Cdc26 PE=2 SV=1 - [CDC26_MOUSE]                     | 9.41  | 1  | 1  | 1  | 1   | 1.046 | 0.830 | 1.022 | 0.676 | 2.32   | 9.41  | 1  | 1   | 85   | 9.8   | 6.81  |
| D3Z660   | Protein Gm46 OS=Mus musculus GN=Gm46 PE=3 SV=1 - [D3Z660_MOUSE]                                                 | 6.46  | 1  | 1  | 2  | 2   | 1.004 | 1.482 | 0.858 | 0.676 | 3.15   | 6.46  | 2  | 2   | 418  | 46.7  | 9.94  |
| Q5XJVS   | Nuclear receptor coactivator 6 OS=Mus musculus GN=Ncoa6 PE=2 SV=1 - [Q5XJVS_MOUSE]                              | 5.61  | 6  | 7  | 7  | 10  | 1.368 | 1.253 | 0.942 | 0.676 | 15.58  | 5.61  | 9  | 10  | 2069 | 219.8 | 9.35  |
| Q9D132   | Uroplakin-1a OS=Mus musculus GN=Upk1a PE=1 SV=1 - [UPK1A_MOUSE]                                                 | 12.06 | 1  | 1  | 1  | 1   | 1.555 | 1.148 | 0.782 | 0.676 | 2.25   | 12.06 | 1  | 1   | 257  | 28.8  | 5.33  |
| E9Q9Q5   | Protein 1700113H08Rik OS=Mus musculus GN=1700113H08Rik PE=4 SV=1 - [E9Q9Q5_MOUSE]                               | 3.67  | 1  | 1  | 1  | 1   | 1.483 | 1.751 | 0.961 | 0.677 | 2.51   | 3.67  | 1  | 1   | 327  | 35.5  | 9.14  |
| Q9CQ79   | Thioredoxin domain-containing protein 9 OS=Mus musculus GN=Txndc9 PE=1 SV=1 - [TXND9_MOUSE]                     | 19.91 | 1  | 4  | 5  | 12  | 1.447 | 0.939 | 0.958 | 0.677 | 31.34  | 19.91 | 8  | 12  | 226  | 26.2  | 5.95  |
| P98064   | Mannan-binding lectin serine protease 1 OS=Mus musculus GN=Masp1 PE=1 SV=2 - [MASP1_MOUSE]                      | 1.99  | 2  | 1  | 1  | 2   | 3.707 | 0.858 | 0.858 | 0.677 | 6.00   | 1.99  | 2  | 2   | 704  | 79.9  | 5.55  |
| Q8HW98   | IgLOW family member 5 OS=Mus musculus GN=Iglon5 PE=2 SV=2 - [IGLO5_MOUSE]                                       | 29.46 | 1  | 8  | 9  | 49  | 1.442 | 0.376 | 0.542 | 0.678 | 156.77 | 29.46 | 15 | 49  | 336  | 36.7  | 7.69  |
| Q5F2E7   | Nuclear fragile X mental retardation-interacting protein 2 OS=Mus musculus GN=Nufip2 PE=1 SV=1 - [NUFIP2_MOUSE] | 34.39 | 2  | 16 | 16 | 54  | 1.306 | 0.539 | 0.910 | 0.678 | 164.60 | 34.39 | 26 | 54  | 692  | 75.6  | 8.70  |
| Q60872   | Eukaryotic translation initiation factor 1A OS=Mus musculus GN=Eif1a PE=2 SV=3 - [EIF1A_MOUSE]                  | 26.39 | 16 | 5  | 5  | 9   | 0.869 | 0.837 | 0.990 | 0.678 | 20.24  | 26.39 | 7  | 9   | 144  | 16.5  | 5.24  |
| Q80VNO   | Coiled-coil domain-containing protein 37 OS=Mus musculus GN=Ccdc37 PE=2 SV=1 - [CCD37_MOUSE]                    | 5.66  | 2  | 3  | 3  | 3   | 3.394 | 0.760 | 1.136 | 0.679 | 6.76   | 5.66  | 3  | 3   | 459  | 53.8  | 8.29  |
| Q05816   | Fatty acid-binding protein, epidermal OS=Mus musculus GN=Fabp5 PE=1 SV=3 - [FABP5_MOUSE]                        | 65.93 | 1  | 7  | 7  | 169 | 1.770 | 0.484 | 0.821 | 0.679 | 474.08 | 65.93 | 14 | 169 | 135  | 15.1  | 6.54  |
| P63089   | Pleiotrophin OS=Mus musculus GN=Ptn PE=2 SV=1 - [PTN_MOUSE]                                                     | 21.43 | 1  | 4  | 4  | 23  | 0.468 | 1.300 | 1.015 | 0.680 | 58.82  | 21.43 | 8  | 23  | 168  | 18.9  | 9.60  |
| Q62469   | Integrin alpha-2 OS=Mus musculus GN=Itga2 PE=1 SV=2 - [ITA2_MOUSE]                                              | 1.87  | 1  | 1  | 2  | 3   | 0.591 | 0.849 | 0.404 | 0.680 | 7.07   | 1.87  | 3  | 3   | 1178 | 128.9 | 5.21  |
| Q9QZC8   | Abhydrolase domain-containing protein 1 OS=Mus musculus GN=Abhd1 PE=2 SV=2 - [ABHD1_MOUSE]                      | 1.94  | 1  | 1  | 1  | 3   | 0.595 | 0.673 | 0.675 | 0.680 | 6.90   | 1.94  | 2  | 3   | 412  | 45.7  | 7.24  |
| H3BLK2   | Dual-specificity protein phosphatase 3 OS=Mus musculus GN=Dusp3 PE=2 SV=1 - [H3BLK2_MOUSE]                      | 13.41 | 1  | 1  | 1  | 2   | 1.069 | 1.098 | 0.969 | 0.681 | 4.98   | 13.41 | 2  | 2   | 82   | 8.8   | 4.35  |
| Q32M26   | Uncharacterized protein C11orf87 homolog OS=Mus musculus PE=2 SV=1 - [CX087_MOUSE]                              | 5.03  | 1  | 1  | 1  | 2   | 0.672 | 0.695 | 1.162 | 0.682 | 8.55   | 5.03  | 2  | 2   | 199  | 20.7  | 9.29  |
| Q3UJ00   | Homeobox protein Meis1 OS=Mus musculus GN=Meis1 PE=2 SV=1 - [Q3UJ00_MOUSE]                                      | 10.95 | 14 | 2  | 2  | 3   | 1.765 | 1.122 | 1.389 | 0.682 | 4.31   | 10.95 | 3  | 3   | 210  | 23.0  | 5.95  |
| Q4VBE7   | BTB/POZ domain-containing protein KCTD2 OS=Mus musculus GN=Kctd2 PE=2 SV=1 - [Q4VBE7_MOUSE]                     | 14.83 | 3  | 2  | 2  | 2   | 1.567 | 2.020 | 0.741 | 0.682 | 5.52   | 14.83 | 2  | 2   | 263  | 28.6  | 5.29  |



|          |                                                                                                                         |       |   |    |    |     |       |       |       |       |         |       |    |     |      |       |       |
|----------|-------------------------------------------------------------------------------------------------------------------------|-------|---|----|----|-----|-------|-------|-------|-------|---------|-------|----|-----|------|-------|-------|
| Q8B184   | Melanoma inhibitory activity protein 3 OS=Mus musculus GN=Mia3 PE=1 SV=2 - [MIA3_MOUSE]                                 | 23.11 | 3 | 19 | 37 | 119 | 1.522 | 0.996 | 0.937 | 0.684 | 324.62  | 23.11 | 62 | 119 | 1930 | 213.5 | 4.75  |
| Q80T37   | Histone lysine demethylase PHF8 OS=Mus musculus GN=Phf8 PE=1 SV=2 - [PHF8_MOUSE]                                        | 3.52  | 4 | 2  | 3  | 5   | 0.592 | 0.659 | 0.787 | 0.684 | 11.26   | 3.52  | 5  | 5   | 1023 | 113.5 | 8.44  |
| Q99N91   | 39S ribosomal protein L34, mitochondrial OS=Mus musculus GN=Mpl34 PE=2 SV=1 - [RM34_MOUSE]                              | 23.91 | 1 | 2  | 2  | 11  | 0.713 | 0.471 | 0.872 | 0.684 | 25.96   | 23.91 | 4  | 11  | 92   | 10.5  | 11.81 |
| A2A4H9   | Peptidyl-prolyl cis-trans isomerase FKBP10 OS=Mus musculus GN=Fkbp10 PE=2 SV=1 - [A2A4H9_MOUSE]                         | 13.86 | 2 | 5  | 5  | 12  | 1.348 | 1.372 | 0.609 | 0.684 | 23.96   | 13.86 | 7  | 12  | 469  | 52.3  | 5.53  |
| Q9D7M8   | DNA-directed RNA polymerase II subunit RPB4 OS=Mus musculus GN=Polr2d PE=2 SV=2 - [RPB4_MOUSE]                          | 10.56 | 1 | 1  | 1  | 4   | 1.800 | 0.913 | 0.805 | 0.684 | 14.17   | 10.56 | 1  | 4   | 142  | 16.3  | 4.79  |
| Q92111   | Serotransferrin OS=Mus musculus GN=Tf PE=1 SV=1 - [TRFE_MOUSE]                                                          | 57.96 | 6 | 3  | 44 | 479 | 3.484 | 1.210 | 0.530 | 0.685 | 1364.79 | 57.96 | 81 | 479 | 697  | 76.7  | 7.18  |
| Q60764   | Probable E3 ubiquitin-protein ligase makorin-3 OS=Mus musculus GN=Mkkn3 PE=2 SV=2 - [MKRN3_MOUSE]                       | 10.29 | 1 | 4  | 5  | 8   | 1.069 | 0.626 | 0.627 | 0.685 | 27.74   | 10.29 | 8  | 8   | 544  | 59.4  | 6.64  |
| Q3TGF2   | Protein FAM107B OS=Mus musculus GN=Fam107b PE=2 SV=2 - [F107B_MOUSE]                                                    | 26.72 | 5 | 3  | 4  | 11  | 1.621 | 0.604 | 1.147 | 0.685 | 25.82   | 26.72 | 7  | 11  | 131  | 15.6  | 8.31  |
| G3UW85   | ATP-dependent RNA helicase DDX3X OS=Mus musculus GN=Erh PE=4 SV=1 - [G3UW85_MOUSE]                                      | 47.97 | 3 | 5  | 5  | 32  | 1.349 | 0.828 | 0.785 | 0.685 | 80.78   | 47.97 | 8  | 32  | 123  | 14.3  | 5.54  |
| Q9CPV9   | P2Y purinoceptor 12 OS=Mus musculus GN=P2ry12 PE=2 SV=1 - [P2Y12_MOUSE]                                                 | 8.07  | 1 | 3  | 3  | 10  | 0.732 | 1.133 | 0.943 | 0.685 | 26.15   | 8.07  | 4  | 10  | 347  | 39.4  | 9.58  |
| Q8BP27-2 | Isoform 2 of Swi5-dependent recombination DNA repair protein 1 homolog OS=Mus musculus GN=Sfr1 - [SFR1_MOUSE]           | 46.86 | 3 | 10 | 10 | 34  | 1.281 | 0.885 | 0.965 | 0.686 | 89.90   | 46.86 | 17 | 34  | 303  | 33.5  | 5.14  |
| Q8R0A0   | General transcription factor IIF subunit 2 OS=Mus musculus GN=Glrf2 PE=1 SV=1 - [T2FB_MOUSE]                            | 21.29 | 1 | 5  | 6  | 11  | 1.769 | 0.813 | 0.944 | 0.686 | 23.27   | 21.29 | 10 | 11  | 249  | 28.4  | 9.22  |
| G3UYF9   | Prefoldin subunit 6 OS=Mus musculus GN=H2-ke2 PE=2 SV=1 - [G3UYF9_MOUSE]                                                | 57.43 | 1 | 1  | 7  | 44  | 1.539 | 1.242 | 1.021 | 0.686 | 130.09  | 57.43 | 14 | 44  | 101  | 11.4  | 8.44  |
| Q3UH53   | Protein sidekick-1 OS=Mus musculus GN=Sdk1 PE=2 SV=1 - [SDK1_MOUSE]                                                     | 2.64  | 2 | 4  | 5  | 8   | 1.384 | 1.041 | 0.791 | 0.686 | 11.10   | 2.64  | 6  | 8   | 2193 | 240.2 | 6.77  |
| P63276   | 40S ribosomal protein S17 OS=Mus musculus GN=Rps17 PE=1 SV=2 - [RS17_MOUSE]                                             | 47.41 | 1 | 5  | 5  | 29  | 0.357 | 0.634 | 0.668 | 0.686 | 86.97   | 47.41 | 7  | 29  | 135  | 15.5  | 9.85  |
| Q8BP78   | Protein FRA10A1 homolog OS=Mus musculus GN=Fra10ac1 PE=1 SV=3 - [FRA10_MOUSE]                                           | 9.21  | 1 | 2  | 2  | 3   | 0.609 | 0.494 | 0.794 | 0.686 | 10.23   | 9.21  | 2  | 3   | 315  | 37.2  | 7.28  |
| P13595   | Neural cell adhesion molecule 1 OS=Mus musculus GN=Ncam1 PE=1 SV=3 - [NCAM1_MOUSE]                                      | 42.42 | 4 | 10 | 42 | 842 | 0.763 | 0.531 | 0.673 | 0.687 | 2584.70 | 42.42 | 79 | 842 | 1115 | 119.4 | 4.83  |
| Q6PDM1-4 | Isoform 4 of Male-specific lethal 1 homolog OS=Mus musculus GN=Msl1 - [MSL1_MOUSE]                                      | 13.61 | 6 | 4  | 4  | 9   | 1.448 | 0.722 | 1.190 | 0.687 | 28.94   | 13.61 | 8  | 9   | 463  | 49.2  | 8.94  |
| Q99KV1   | DnaJ homolog subfamily B member 11 OS=Mus musculus GN=Dnajb11 PE=1 SV=1 - [DNAJB11_MOUSE]                               | 32.40 | 1 | 9  | 9  | 31  | 1.046 | 0.663 | 0.801 | 0.687 | 85.15   | 32.40 | 14 | 31  | 358  | 40.5  | 6.32  |
| Q9JIS8   | Solute carrier family 12 member 4 OS=Mus musculus GN=Slc12a4 PE=1 SV=2 - [SLC12A4_MOUSE]                                | 13.09 | 3 | 6  | 12 | 65  | 0.761 | 0.560 | 0.595 | 0.688 | 171.99  | 13.09 | 21 | 65  | 1085 | 120.5 | 6.67  |
| Q9DCC5   | Cbx3 protein OS=Mus musculus GN=Cbx3 PE=2 SV=1 - [Q9DCC5_MOUSE]                                                         | 50.82 | 4 | 4  | 6  | 32  | 1.495 | 0.696 | 0.929 | 0.688 | 115.46  | 50.82 | 9  | 32  | 183  | 20.8  | 5.33  |
| Q5DU31-2 | Isoform 2 of Interactor protein for cytohesin exchange factors 1 OS=Mus musculus GN=Ipcpf1 - [IPCPF1_MOUSE]             | 14.39 | 6 | 5  | 5  | 11  | 0.704 | 1.134 | 1.427 | 0.689 | 26.18   | 14.39 | 8  | 11  | 410  | 46.3  | 6.73  |
| Q99K30   | Epidermal growth factor receptor kinase substrate 8-like protein 2 OS=Mus musculus GN=Eps8l2 PE=1 SV=1 - [EPS8L2_MOUSE] | 13.85 | 2 | 6  | 6  | 9   | 1.597 | 0.923 | 1.268 | 0.690 | 27.26   | 13.85 | 7  | 9   | 729  | 82.2  | 7.18  |
| F8WGL3   | Cofilin-1 OS=Mus musculus GN=Cfl1 PE=2 SV=1 - [F8WGL3_MOUSE]                                                            | 57.71 | 1 | 1  | 23 | 542 | 0.898 | 0.669 | 1.299 | 0.690 | 1400.79 | 57.71 | 42 | 542 | 227  | 24.6  | 8.03  |
| J3QNH8   | Protein Gm7694 OS=Mus musculus GN=Gm7694 PE=4 SV=1 - [J3QNH8_MOUSE]                                                     | 6.30  | 1 | 1  | 1  | 2   | 3.091 | 1.355 | 0.716 | 0.691 | 6.70    | 6.30  | 1  | 2   | 270  | 28.5  | 5.50  |

|          |                                                                                                                                  |       |    |    |    |     |       |       |       |       |        |       |    |     |      |       |       |
|----------|----------------------------------------------------------------------------------------------------------------------------------|-------|----|----|----|-----|-------|-------|-------|-------|--------|-------|----|-----|------|-------|-------|
| Q9CPW7   | Zinc finger matrin-type protein 2 OS=Mus musculus GN=Zmat2 PE=2 SV=1 - [ZMAT2_MOUSE]                                             | 15.58 | 1  | 4  | 4  | 5   | 0.633 | 0.492 | 1.177 | 0.691 | 13.90  | 15.58 | 5  | 5   | 199  | 23.6  | 9.01  |
| Q99NH0   | Ankyrin repeat domain-containing protein 17 OS=Mus musculus GN=Ankrd17 PE=1 SV=2 - [ANR17_MOUSE]                                 | 10.83 | 6  | 13 | 20 | 53  | 1.110 | 0.817 | 0.931 | 0.691 | 132.88 | 10.83 | 35 | 53  | 2603 | 274.0 | 6.52  |
| Q8BJF9   | Charged multivesicular body protein 2b OS=Mus musculus GN=Chmp2b PE=2 SV=1 -                                                     | 30.52 | 1  | 7  | 8  | 22  | 1.312 | 0.538 | 1.269 | 0.691 | 69.59  | 30.52 | 15 | 22  | 213  | 23.9  | 8.78  |
| Q9Z304   | Protein S-Myc OS=Mus musculus GN=Mycs PE=2 SV=2 - [MYCS_MOUSE]                                                                   | 2.09  | 1  | 1  | 1  | 1   | 1.225 | 1.095 | 0.976 | 0.691 | 3.31   | 2.09  | 1  | 1   | 431  | 47.6  | 6.09  |
| Q9D173   | Mitochondrial import receptor subunit TOM7 homolog OS=Mus musculus GN=Tomm7 PE=3 SV=1 -                                          | 41.82 | 1  | 2  | 2  | 2   | 1.649 | 0.766 | 0.680 | 0.691 | 5.86   | 41.82 | 2  | 2   | 55   | 6.2   | 10.17 |
| Q9R226   | KH domain-containing, RNA-binding, signal transduction-associated protein 3 OS=Mus musculus GN=Khdrbs3 PE=1 SV=1 - [KHDR3_MOUSE] | 28.32 | 2  | 7  | 12 | 57  | 1.061 | 1.118 | 1.240 | 0.691 | 129.61 | 28.32 | 21 | 57  | 346  | 38.8  | 8.10  |
| P09242   | Alkaline phosphatase, tissue-nonspecific isozyme OS=Mus musculus GN=Alpl PE=1 SV=2 - [PPBT_MOUSE]                                | 34.92 | 4  | 15 | 15 | 43  | 0.933 | 1.065 | 0.499 | 0.691 | 128.66 | 34.92 | 23 | 43  | 524  | 57.5  | 7.01  |
| Q3UH85   | Protein 8430427/H17Rik OS=Mus musculus GN=8430427H17Rik PE=2 SV=1 - [Q3UH85_MOUSE]                                               | 14.87 | 3  | 5  | 7  | 13  | 1.616 | 1.033 | 0.820 | 0.692 | 33.14  | 14.87 | 10 | 13  | 679  | 74.2  | 5.77  |
| Q9DCT5   | Stromal cell-derived factor 2 OS=Mus musculus GN=Sdf2 PE=2 SV=1 - [SDF2_MOUSE]                                                   | 43.13 | 1  | 6  | 6  | 30  | 1.517 | 0.860 | 0.931 | 0.692 | 86.82  | 43.13 | 11 | 30  | 211  | 23.1  | 7.33  |
| Q8BQ30   | Phostensin OS=Mus musculus GN=Ppp1r18 PE=1 SV=1 - [PPR18_MOUSE]                                                                  | 28.45 | 2  | 10 | 10 | 15  | 1.933 | 0.796 | 1.152 | 0.692 | 39.05  | 28.45 | 13 | 15  | 594  | 65.6  | 5.39  |
| B1A504   | Protein LZIC (Fragment) OS=Mus musculus GN=Lzic PE=2 SV=1 - [B1A504_MOUSE]                                                       | 40.00 | 2  | 1  | 3  | 12  | 1.439 | 0.827 | 1.007 | 0.692 | 37.53  | 40.00 | 5  | 12  | 65   | 7.7   | 4.51  |
| Q3TXT3   | SOSS complex subunit C OS=Mus musculus GN=Inip PE=2 SV=1 - [SOSSC_MOUSE]                                                         | 10.58 | 1  | 1  | 1  | 2   | 1.290 | 1.379 | 1.254 | 0.692 | 5.80   | 10.58 | 2  | 2   | 104  | 11.4  | 9.25  |
| E9PYH0   | Versican core protein OS=Mus musculus GN=Vcan PE=2 SV=1 - [E9PYH0_MOUSE]                                                         | 10.17 | 10 | 4  | 30 | 212 | 1.799 | 0.618 | 0.875 | 0.692 | 593.78 | 10.17 | 52 | 212 | 3354 | 366.7 | 4.63  |
| Q91ZU6-5 | Isoform 5 of Dystonin OS=Mus musculus GN=Dpe - [DYST_MOUSE]                                                                      | 10.99 | 1  | 2  | 28 | 62  | 1.246 | 1.038 | 1.254 | 0.692 | 184.58 | 10.99 | 42 | 62  | 2611 | 301.5 | 6.55  |
| Q3UPH1   | Protein PRRC1 OS=Mus musculus GN=Prrc1 PE=2 SV=1 - [PRRC1_MOUSE]                                                                 | 13.54 | 1  | 5  | 5  | 10  | 0.939 | 1.727 | 0.782 | 0.693 | 26.47  | 13.54 | 8  | 10  | 443  | 46.3  | 5.95  |
| Q8R3P8   | Protein Rnf113a1 OS=Mus musculus GN=Rnf113a1 PE=2 SV=1 - [Q8R3P8_MOUSE]                                                          | 22.29 | 1  | 7  | 7  | 17  | 1.406 | 0.707 | 1.072 | 0.693 | 47.58  | 22.29 | 11 | 17  | 341  | 38.4  | 7.06  |
| F8WGD4   | Serine/threonine-protein kinase Nek3 OS=Mus musculus GN=Nek3 PE=2 SV=1 - [F8WGD4_MOUSE]                                          | 6.88  | 2  | 3  | 3  | 8   | 1.277 | 0.814 | 0.756 | 0.693 | 20.62  | 6.88  | 5  | 8   | 509  | 57.2  | 7.01  |
| E9QB02   | Methionine-tRNA ligase, cytoplasmic OS=Mus musculus GN=Mars PE=2 SV=1 - [E9QB02_MOUSE]                                           | 37.69 | 2  | 1  | 32 | 104 | 0.711 | 0.630 | 0.795 | 0.693 | 279.57 | 37.69 | 57 | 104 | 910  | 102.3 | 6.92  |
| Q99L45   | Eukaryotic translation initiation factor 2 subunit 2 OS=Mus musculus GN=EIF2s2 PE=1 SV=1 - [IF2b_MOUSE]                          | 32.63 | 3  | 12 | 12 | 44  | 0.622 | 0.669 | 0.802 | 0.694 | 130.31 | 32.63 | 19 | 44  | 331  | 38.1  | 5.80  |
| Q62446   | Peptidyl-prolyl cis-trans isomerase FKBP3 OS=Mus musculus GN=Fkbp3 PE=1 SV=2 - [FKBP3_MOUSE]                                     | 44.64 | 1  | 12 | 12 | 38  | 1.318 | 0.466 | 0.960 | 0.694 | 95.05  | 44.64 | 18 | 38  | 224  | 25.1  | 9.28  |
| Q91W67   | Ubiquitin-like protein 7 OS=Mus musculus GN=Ubl7 PE=1 SV=2 - [UBL7_MOUSE]                                                        | 15.79 | 2  | 5  | 5  | 14  | 1.202 | 0.981 | 0.787 | 0.694 | 34.34  | 15.79 | 9  | 14  | 380  | 40.4  | 5.01  |
| Q8BVF7   | Gamma-secretase subunit APH-1A OS=Mus musculus GN=Aph1a PE=2 SV=2 - [APH1A_MOUSE]                                                | 8.30  | 2  | 2  | 2  | 5   | 1.078 | 1.029 | 0.807 | 0.694 | 13.06  | 8.30  | 4  | 5   | 265  | 29.0  | 7.90  |
| A2AMY5   | Ubiquitin-associated protein 2 OS=Mus musculus GN=Ubp2 PE=2 SV=1 -                                                               | 18.83 | 5  | 17 | 17 | 60  | 1.442 | 0.776 | 0.905 | 0.695 | 155.82 | 18.83 | 26 | 60  | 1131 | 117.8 | 7.72  |
| Q6P5U8   | Coiled-coil domain-containing protein 148 OS=Mus musculus GN=Ccdc148 PE=2 SV=1 - [CC148_MOUSE]                                   | 2.66  | 2  | 1  | 2  | 2   | 3.853 | 1.707 | 1.025 | 0.695 | 5.55   | 2.66  | 2  | 2   | 527  | 63.4  | 6.62  |
| Q99KK1   | Receptor expression-enhancing protein 3 OS=Mus musculus GN=Reep3 PE=1 SV=1 - [REEP3_MOUSE]                                       | 19.29 | 2  | 5  | 5  | 12  | 1.190 | 0.515 | 0.616 | 0.695 | 25.09  | 19.29 | 9  | 12  | 254  | 29.2  | 9.58  |

|          |                                                                                                                      |       |    |    |    |      |       |       |       |       |         |       |    |      |      |       |      |
|----------|----------------------------------------------------------------------------------------------------------------------|-------|----|----|----|------|-------|-------|-------|-------|---------|-------|----|------|------|-------|------|
| E9QP46   | Nesprin-2 OS=Mus musculus GN=Syn2 PE=2 SV=1 - [E9QP46_MOUSE]                                                         | 3.70  | 4  | 11 | 23 | 34   | 2.166 | 1.151 | 1.171 | 0.695 | 64.08   | 3.70  | 29 | 34   | 6870 | 781.7 | 5.31 |
| Q9WVM6   | Toll-like protein 2 OS=Mus musculus GN=TLI2 PE=1 SV=1 - [TLI2_MOUSE]                                                 | 0.99  | 1  | 1  | 1  | 1    | 4.476 | 1.242 | 0.716 | 0.695 | 1.88    | 0.99  | 1  | 1    | 1012 | 113.2 | 5.96 |
| P01867-2 | Isoform 2 of Ig gamma-2B chain C region OS=Mus musculus GN=Igh-3 - [IGG2B_MOUSE]                                     | 25.97 | 2  | 5  | 5  | 9    | 1.827 | 3.055 | 0.844 | 0.695 | 27.74   | 25.97 | 8  | 9    | 335  | 36.6  | 7.36 |
| Q9Z131-2 | Isoform 2 of SH3 domain-binding protein 5 OS=Mus musculus GN=Sh3bp5 - [3BP5_MOUSE]                                   | 7.42  | 3  | 3  | 4  | 11   | 1.330 | 0.780 | 1.088 | 0.696 | 23.59   | 7.42  | 7  | 11   | 458  | 51.0  | 5.11 |
| E9Q1N0   | Protein 4932431P20Rik OS=Mus musculus GN=4932431P20Rik PE=2 SV=1 - [E9Q1N0_MOUSE]                                    | 3.55  | 1  | 5  | 6  | 8    | 3.481 | 3.027 | 0.945 | 0.696 | 14.90   | 3.55  | 6  | 8    | 3095 | 357.3 | 5.49 |
| Q6XLQ8   | Calumenin OS=Mus musculus GN=Calu PE=2 SV=1 - [Q6XLQ8_MOUSE]                                                         | 58.73 | 5  | 2  | 15 | 77   | 1.554 | 0.957 | 1.183 | 0.697 | 237.38  | 58.73 | 25 | 77   | 315  | 37.1  | 4.59 |
| Q9D727   | Uncharacterized protein C6orf226 homolog OS=Mus musculus PE=4 SV=1 - [CFZ26_MOUSE]                                   | 53.51 | 1  | 4  | 4  | 9    | 1.927 | 1.135 | 0.841 | 0.697 | 29.06   | 53.51 | 7  | 9    | 114  | 12.0  | 6.29 |
| Q9CQY5-2 | Isoform 2 of Magnesium transporter protein 1 OS=Mus musculus GN=Magt1 - [MAGT1_MOUSE]                                | 11.76 | 6  | 3  | 4  | 7    | 1.039 | 0.843 | 0.644 | 0.698 | 14.37   | 11.76 | 5  | 7    | 306  | 34.5  | 9.72 |
| F6XWQ4   | Protein Ciz1 (Fragment) OS=Mus musculus GN=Cz1 PE=4 SV=1 - [F6XWQ4_MOUSE]                                            | 17.71 | 6  | 4  | 4  | 9    | 1.534 | 2.125 | 1.890 | 0.698 | 11.54   | 17.71 | 5  | 9    | 288  | 31.3  | 5.11 |
| Q9CRC3   | UF0235 protein C15orf40 homolog OS=Mus musculus PE=2 SV=1 - [CO040_MOUSE]                                            | 10.32 | 1  | 1  | 1  | 3    | 1.291 | 1.002 | 0.852 | 0.698 | 5.16    | 10.32 | 2  | 3    | 126  | 13.2  | 9.16 |
| E9PWH4   | Protein Abca15 OS=Mus musculus GN=Abca15 PE=2 SV=1 - [E9PWH4_MOUSE]                                                  | 2.64  | 2  | 3  | 3  | 4    | 1.697 | 0.531 | 0.899 | 0.698 | 4.39    | 2.64  | 4  | 4    | 1668 | 190.4 | 8.53 |
| Q8BTT6   | Digestive organ expansion factor homolog OS=Mus musculus GN=Diefx PE=2 SV=2 - [DIEFX_MOUSE]                          | 5.18  | 1  | 2  | 4  | 5    | 1.487 | 0.711 | 0.895 | 0.699 | 4.49    | 5.18  | 4  | 5    | 772  | 88.8  | 5.74 |
| Q9DCI9   | 39S ribosomal protein L32, mitochondrial OS=Mus musculus GN=Mip132 PE=2 SV=1 - [RM32_MOUSE]                          | 16.04 | 1  | 2  | 2  | 12   | 0.990 | 0.565 | 1.037 | 0.699 | 35.00   | 16.04 | 4  | 12   | 187  | 21.7  | 9.70 |
| E9PZK7   | ADP-ribosylation factor-related protein 1 OS=Mus musculus GN=Arfp1 PE=2 SV=1 - [E9PZK7_MOUSE]                        | 11.69 | 2  | 1  | 1  | 1    | 1.630 | 2.198 | 0.711 | 0.699 | 3.32    | 11.69 | 1  | 1    | 154  | 17.1  | 5.39 |
| E9PZH0   | Protein Tmem29 OS=Mus musculus GN=Tmem29 PE=4 SV=1 - [E9PZH0_MOUSE]                                                  | 8.13  | 1  | 1  | 1  | 1    | 1.575 | 0.883 | 0.613 | 0.700 | 3.12    | 8.13  | 1  | 1    | 123  | 14.3  | 4.92 |
| O88736   | 3-keto-steroid reductase OS=Mus musculus GN=Hsd17b7 PE=2 SV=1 - [DHB7_MOUSE]                                         | 20.06 | 2  | 5  | 5  | 16   | 0.684 | 0.348 | 0.655 | 0.700 | 44.12   | 20.06 | 9  | 16   | 334  | 37.3  | 6.73 |
| Q9ERB5   | Solute carrier organic anion transporter family member 1C1 OS=Mus musculus GN=Sloc1c1 PE=1 SV=1 - [SLOC1_MOUSE]      | 6.29  | 2  | 2  | 2  | 4    | 0.641 | 0.881 | 1.266 | 0.701 | 6.84    | 6.29  | 3  | 4    | 715  | 78.3  | 8.81 |
| Q61792   | LIM and SH3 domain protein 1 OS=Mus musculus GN=Lasp1 PE=1 SV=1 - [LASP1_MOUSE]                                      | 46.01 | 12 | 9  | 16 | 200  | 1.431 | 0.964 | 1.062 | 0.701 | 535.76  | 46.01 | 27 | 200  | 263  | 30.0  | 7.05 |
| Q8VC15   | Peroxisomal biogenesis factor 19 OS=Mus musculus GN=Pex19 PE=1 SV=1 - [PEX19_MOUSE]                                  | 55.18 | 2  | 11 | 11 | 46   | 1.668 | 0.653 | 1.036 | 0.701 | 150.99  | 55.18 | 18 | 46   | 299  | 32.7  | 4.34 |
| Q9CYA0   | Cysteine-rich with EGF-like domain protein 2 OS=Mus musculus GN=Crel2 PE=2 SV=1 - [CREL2_MOUSE]                      | 24.86 | 1  | 10 | 10 | 25   | 2.033 | 0.780 | 0.817 | 0.701 | 67.56   | 24.86 | 17 | 25   | 350  | 38.2  | 4.58 |
| Q8K2J0   | 1-phosphatidylinositol 4,5-bisphosphate phosphodiesterase delta-3 OS=Mus musculus GN=Pldc3 PE=1 SV=2 - [PLCD3_MOUSE] | 8.92  | 2  | 6  | 6  | 10   | 0.422 | 0.944 | 0.788 | 0.702 | 27.66   | 8.92  | 10 | 10   | 785  | 88.6  | 6.83 |
| A2A910   | Golgi SNAP receptor complex member 2 OS=Mus musculus GN=Gosr2 PE=4 SV=1 - [A2A910_MOUSE]                             | 14.55 | 2  | 3  | 3  | 8    | 0.713 | 1.119 | 0.645 | 0.702 | 16.82   | 14.55 | 6  | 8    | 165  | 19.6  | 9.50 |
| P30558   | Proteinase-activated receptor 1 OS=Mus musculus GN=F2r PE=1 SV=2 - [PAR1_MOUSE]                                      | 2.33  | 1  | 1  | 1  | 1    | 1.246 | 0.765 | 0.553 | 0.702 | 0.00    | 2.33  | 1  | 1    | 430  | 47.8  | 7.43 |
| Q6PB93   | Polypeptide N-acetylgalactosaminyltransferase 2 OS=Mus musculus GN=Galnt2 PE=2 SV=1 - [GALT2_MOUSE]                  | 23.51 | 2  | 10 | 10 | 24   | 0.762 | 0.798 | 0.611 | 0.703 | 59.20   | 23.51 | 14 | 24   | 570  | 64.5  | 8.53 |
| P07724   | Serum albumin OS=Mus musculus GN=Alb PE=1 SV=3 - [ALBU_MOUSE]                                                        | 75.49 | 4  | 49 | 49 | 2294 | 3.914 | 1.644 | 0.408 | 0.703 | 6501.08 | 75.49 | 93 | 2294 | 608  | 68.6  | 6.07 |

|          |                                                                                                                     |       |    |    |    |     |       |       |       |       |         |       |     |     |      |       |       |
|----------|---------------------------------------------------------------------------------------------------------------------|-------|----|----|----|-----|-------|-------|-------|-------|---------|-------|-----|-----|------|-------|-------|
| D3YX57   | Fanconi anemia group I protein homolog OS=Mus musculus GN=Fanci PE=2 SV=1 - [D3YX57_MOUSE]                          | 5.51  | 7  | 3  | 5  | 6   | 0.284 | 0.763 | 0.855 | 0.703 | 9.49    | 5.51  | 6   | 6   | 1325 | 148.7 | 6.16  |
| Q8R2Y9   | SOSS complex subunit B1 OS=Mus musculus GN=Nabp2 PE=2 SV=1 - [SOSB1_MOUSE]                                          | 14.62 | 4  | 1  | 2  | 9   | 0.934 | 0.780 | 0.949 | 0.703 | 22.36   | 14.62 | 4   | 9   | 212  | 22.6  | 9.06  |
| Q8BLV8   | Protein GPR107 OS=Mus musculus GN=Gpr107 PE=2 SV=2 - [GP107_MOUSE]                                                  | 10.89 | 1  | 5  | 6  | 10  | 0.809 | 0.813 | 0.679 | 0.703 | 26.41   | 10.89 | 9   | 10  | 551  | 62.0  | 7.59  |
| Q8VHC3   | Selenoprotein M OS=Mus musculus GN=Selm PE=1 SV=3 - [SELM_MOUSE]                                                    | 55.17 | 1  | 5  | 5  | 43  | 1.578 | 0.665 | 0.891 | 0.704 | 141.88  | 55.17 | 8   | 43  | 145  | 16.4  | 5.54  |
| Q8C4C4   | Repulsive guidance molecule A OS=Mus musculus GN=Rgma PE=2 SV=1 - [Q8C4C4_MOUSE]                                    | 35.17 | 3  | 10 | 10 | 19  | 0.629 | 0.536 | 0.592 | 0.704 | 52.29   | 35.17 | 15  | 19  | 344  | 37.8  | 6.60  |
| P99027   | 60S acidic ribosomal protein P2 OS=Mus musculus GN=Rplp2 PE=1 SV=3 - [RLA2_MOUSE]                                   | 48.70 | 1  | 5  | 5  | 53  | 1.552 | 0.880 | 0.989 | 0.704 | 159.12  | 48.70 | 9   | 53  | 115  | 11.6  | 4.54  |
| Q9CUB6   | OTU domain-containing protein 1 OS=Mus musculus GN=Otd1 PE=2 SV=2 - [OTUD1_MOUSE]                                   | 6.39  | 1  | 1  | 1  | 1   | 1.682 | 2.365 | 1.020 | 0.704 | 4.01    | 6.39  | 1   | 1   | 454  | 48.8  | 6.28  |
| Q5XKN4   | Protein jagunal homolog 1 OS=Mus musculus GN=Jagn1 PE=2 SV=2 - [JAGN1_MOUSE]                                        | 10.38 | 1  | 2  | 2  | 4   | 0.826 | 1.159 | 0.730 | 0.704 | 2.44    | 10.38 | 3   | 4   | 183  | 21.1  | 9.80  |
| Q8BNJ2   | A disintegrin and metalloproteinase with thrombospondin motifs 4 OS=Mus musculus GN=Adamt5 PE=2 SV=2 - [ATC4_MOUSE] | 2.04  | 3  | 2  | 2  | 3   | 0.988 | 1.144 | 0.961 | 0.704 | 7.06    | 2.04  | 3   | 3   | 833  | 90.0  | 8.28  |
| D3YWT0   | Signal peptidase complex catalytic subunit SEC11A OS=Mus musculus GN=Sec11a PE=2 SV=1 - [D3YWT0_MOUSE]              | 25.29 | 4  | 5  | 5  | 21  | 0.564 | 1.040 | 0.583 | 0.705 | 54.74   | 25.29 | 10  | 21  | 170  | 19.6  | 9.48  |
| Q810D6   | Glutamate-rich WD repeat-containing protein 1 OS=Mus musculus GN=Gwd1 PE=2 SV=2 - [GRWD1_MOUSE]                     | 15.02 | 3  | 3  | 3  | 4   | 2.055 | 1.605 | 1.366 | 0.705 | 15.49   | 15.02 | 4   | 4   | 446  | 49.2  | 4.81  |
| P62301   | 40S ribosomal protein S13 OS=Mus musculus GN=Rps13 PE=1 SV=2 - [RS13_MOUSE]                                         | 47.68 | 1  | 9  | 9  | 43  | 0.528 | 0.700 | 0.723 | 0.705 | 115.04  | 47.68 | 16  | 43  | 151  | 17.2  | 10.54 |
| A2ADR8   | Nuclear inhibitor of protein phosphatase 1 OS=Mus musculus GN=Ppp1r8 PE=2 SV=1 - [A2ADR8_MOUSE]                     | 30.29 | 2  | 7  | 7  | 27  | 0.874 | 0.421 | 0.843 | 0.705 | 68.98   | 30.29 | 12  | 27  | 350  | 38.4  | 7.15  |
| Q6P1J1   | Cmp1 protein OS=Mus musculus GN=Cmp1 PE=2 SV=1 - [Q6P1J1_MOUSE]                                                     | 72.16 | 1  | 4  | 36 | 961 | 0.914 | 0.726 | 0.900 | 0.705 | 2628.42 | 72.16 | 67  | 961 | 686  | 74.2  | 6.81  |
| P25911-2 | Isoform 2 of Tyrosine-protein kinase Lyn OS=Mus musculus GN=Lyn - [LYN_MOUSE]                                       | 20.77 | 16 | 5  | 9  | 38  | 0.608 | 1.463 | 0.850 | 0.706 | 90.92   | 20.77 | 16  | 38  | 491  | 56.2  | 6.57  |
| Q99PF4-2 | Isoform 2 of Cadherin-23 OS=Mus musculus GN=Cdh23 - [CAD23_MOUSE]                                                   | 3.77  | 5  | 9  | 10 | 19  | 1.143 | 1.152 | 1.094 | 0.706 | 22.83   | 3.77  | 12  | 19  | 3319 | 365.4 | 4.63  |
| P14211   | Calreticulin OS=Mus musculus GN=Calr PE=1 SV=1 - [CALR_MOUSE]                                                       | 57.21 | 1  | 23 | 23 | 234 | 1.287 | 0.976 | 0.866 | 0.706 | 658.96  | 57.21 | 41  | 234 | 416  | 48.0  | 4.49  |
| Q689Z5   | Protein strawberry notch homolog 1 OS=Mus musculus GN=Sbno1 PE=1 SV=2 - [SBNO1_MOUSE]                               | 3.24  | 3  | 3  | 4  | 9   | 0.697 | 1.011 | 0.892 | 0.706 | 33.94   | 3.24  | 6   | 9   | 1390 | 153.6 | 8.07  |
| Q6P2L6-4 | Isoform 4 of Histone-lysine N-methyltransferase NSD3 OS=Mus musculus GN=Whsc11 - [NSD3_MOUSE]                       | 6.76  | 5  | 3  | 3  | 5   | 0.994 | 0.967 | 0.961 | 0.706 | 15.49   | 6.76  | 4   | 5   | 621  | 70.0  | 9.17  |
| Q9CR25   | Diphthamide biosynthesis protein 2 OS=Mus musculus GN=Dph2 PE=1 SV=1 - [DPH2_MOUSE]                                 | 12.68 | 2  | 5  | 5  | 12  | 3.084 | 1.081 | 0.845 | 0.706 | 38.88   | 12.68 | 9   | 12  | 489  | 52.3  | 5.53  |
| Q921K9   | B-cell CLL/lymphoma 7 protein family member B OS=Mus musculus GN=Bcl7b PE=1 SV=1 - [BCL7B_MOUSE]                    | 23.76 | 2  | 2  | 2  | 2   | 2.333 | 0.882 | 0.983 | 0.706 | 7.00    | 23.76 | 2   | 2   | 202  | 22.2  | 4.75  |
| Q69Z38   | Pseudopodium-enriched atypical kinase 1 OS=Mus musculus GN=Peak1 PE=1 SV=4 - [PEAK1_MOUSE]                          | 14.41 | 1  | 17 | 17 | 32  | 0.745 | 1.144 | 1.187 | 0.707 | 96.88   | 14.41 | 24  | 32  | 1735 | 191.0 | 6.87  |
| P62254   | Ubiquitin-conjugating enzyme E2 G1 OS=Mus musculus GN=Ube2g1 PE=2 SV=3 - [Ube2g1_MOUSE]                             | 37.06 | 2  | 6  | 6  | 24  | 2.047 | 0.839 | 0.972 | 0.707 | 71.61   | 37.06 | 11  | 24  | 170  | 19.5  | 5.30  |
| D3Z3M7   | CAP-Gly domain-containing linker protein 1 OS=Mus musculus GN=Ctip1 PE=2 SV=1 - [D3Z3M7_MOUSE]                      | 50.91 | 5  | 1  | 66 | 268 | 1.146 | 1.533 | 1.199 | 0.707 | 762.55  | 50.91 | 117 | 268 | 1320 | 147.9 | 5.31  |
| P62830   | 60S ribosomal protein L23 OS=Mus musculus GN=Rpl23 PE=1 SV=1 - [RL23_MOUSE]                                         | 71.43 | 2  | 10 | 10 | 36  | 0.474 | 0.580 | 0.648 | 0.707 | 109.80  | 71.43 | 18  | 36  | 140  | 14.9  | 10.51 |

|          |                                                                                                              |       |    |    |    |     |       |       |       |       |        |       |    |     |      |       |      |
|----------|--------------------------------------------------------------------------------------------------------------|-------|----|----|----|-----|-------|-------|-------|-------|--------|-------|----|-----|------|-------|------|
| P48437   | Prospero homeobox protein 1 OS=Mus musculus GN=Prox1 PE=1 SV=2 - [PROX1_MOUSE]                               | 6.65  | 1  | 3  | 3  | 6   | 0.831 | 0.530 | 0.857 | 0.707 | 13.69  | 6.65  | 4  | 6   | 737  | 83.1  | 7.08 |
| E0CYH6   | Zinc finger protein 346 OS=Mus musculus GN=Zfp346 PE=2 SV=1 - [E0CYH6_MOUSE]                                 | 8.91  | 9  | 1  | 1  | 2   | 1.244 | 0.894 | 1.206 | 0.708 | 3.40   | 8.91  | 2  | 2   | 101  | 11.2  | 5.10 |
| Q9Z2W0   | Aspartyl aminopeptidase OS=Mus musculus GN=Dnpep PE=2 SV=2 - [DNPEP_MOUSE]                                   | 46.72 | 1  | 15 | 15 | 78  | 2.072 | 0.803 | 0.751 | 0.708 | 275.41 | 46.72 | 24 | 78  | 473  | 52.2  | 7.25 |
| Q9D0B0   | Serine/arginine-rich splicing factor 9 OS=Mus musculus GN=Srsf9 PE=1 SV=1 - [SRSF9_MOUSE]                    | 18.92 | 1  | 2  | 4  | 12  | 1.814 | 0.861 | 0.762 | 0.708 | 31.31  | 18.92 | 7  | 12  | 222  | 25.6  | 8.65 |
| Q8BM41   | Protein LSM14 homolog B OS=Mus musculus GN=Lsm14b PE=2 SV=1 - [Q8BM41_MOUSE]                                 | 21.31 | 1  | 1  | 5  | 11  | 0.832 | 0.683 | 1.060 | 0.708 | 33.73  | 21.31 | 7  | 11  | 305  | 33.2  | 9.74 |
| Q9ER65   | Calsyntenin-2 OS=Mus musculus GN=Cstn2 PE=1 SV=2 - [CSTN2_MOUSE]                                             | 7.87  | 2  | 5  | 5  | 14  | 1.148 | 0.871 | 0.685 | 0.709 | 20.95  | 7.87  | 6  | 14  | 966  | 107.8 | 5.68 |
| Q52KR6   | Acin1 protein OS=Mus musculus GN=Acin1 PE=2 SV=1 - [Q52KR6_MOUSE]                                            | 18.48 | 6  | 1  | 11 | 36  | 0.869 | 0.803 | 0.877 | 0.709 | 100.50 | 18.48 | 19 | 36  | 552  | 64.0  | 8.63 |
| A2A791-2 | Isoform 2 of Zinc finger MYM-type protein 4 OS=Mus musculus GN=Zmym4 -                                       | 2.60  | 3  | 3  | 3  | 4   | 1.182 | 1.250 | 0.791 | 0.709 | 13.40  | 2.60  | 4  | 4   | 1460 | 162.7 | 6.54 |
| Q8R138   | Transmembrane protein 119 OS=Mus musculus GN=Tmem119 PE=2 SV=1 - [TM119_MOUSE]                               | 15.36 | 1  | 3  | 3  | 7   | 0.983 | 1.251 | 0.925 | 0.709 | 26.71  | 15.36 | 6  | 7   | 280  | 29.4  | 4.51 |
| P09103   | Protein disulfide-isomerase OS=Mus musculus GN=P4hb PE=1 SV=2 - [PDIA1_MOUSE]                                | 60.51 | 2  | 30 | 33 | 260 | 1.788 | 0.856 | 0.884 | 0.709 | 604.83 | 60.51 | 58 | 260 | 509  | 57.0  | 4.88 |
| Q9Z2D8   | Methyl-CpG-binding domain protein 3 OS=Mus musculus GN=Mbd3 PE=1 SV=1 - [MBD3_MOUSE]                         | 28.07 | 5  | 8  | 8  | 21  | 0.930 | 0.652 | 0.955 | 0.709 | 57.69  | 28.07 | 12 | 21  | 285  | 32.1  | 5.82 |
| Q8BY05   | Poly(A) polymerase gamma OS=Mus musculus GN=Papalg PE=2 SV=1 - [Q8BY05_MOUSE]                                | 1.86  | 2  | 1  | 1  | 1   | 2.799 | 0.709 | 0.689 | 0.710 | 2.15   | 1.86  | 1  | 1   | 429  | 49.0  | 7.62 |
| Q9CZP0   | Ufm1-specific protease 1 OS=Mus musculus GN=Ufsp1 PE=1 SV=1 - [UFSP1_MOUSE]                                  | 17.51 | 1  | 2  | 2  | 3   | 1.288 | 0.873 | 0.716 | 0.710 | 5.59   | 17.51 | 2  | 3   | 217  | 23.4  | 6.70 |
| D3YAA0   | Set1/Ash2 histone methyltransferase complex subunit ASH2 OS=Mus musculus GN=Ash2l PE=2 SV=1 - [D3YAA0_MOUSE] | 7.58  | 3  | 5  | 5  | 9   | 0.671 | 0.848 | 0.803 | 0.710 | 24.40  | 7.58  | 6  | 9   | 501  | 56.4  | 6.83 |
| Q68FG0-2 | Isoform 2 of Zinc finger C4H2 domain-containing protein OS=Mus musculus GN=Zc4h2 - [ZC4H2_MOUSE]             | 27.19 | 3  | 7  | 7  | 9   | 1.378 | 0.424 | 1.110 | 0.710 | 18.38  | 27.19 | 9  | 9   | 217  | 25.4  | 7.14 |
| Q8CIM8   | Integrator complex subunit 4 OS=Mus musculus GN=Ints4 PE=2 SV=1 - [INT4_MOUSE]                               | 14.52 | 3  | 9  | 9  | 21  | 0.948 | 1.180 | 0.659 | 0.711 | 28.25  | 14.52 | 14 | 21  | 964  | 108.1 | 6.42 |
| Q9ESP1   | Stromal cell-derived factor 2-like protein 1 OS=Mus musculus GN=Sdf2l1 PE=2 SV=2 - [SDF2L_MOUSE]             | 42.53 | 1  | 6  | 6  | 18  | 1.424 | 0.651 | 0.928 | 0.711 | 62.24  | 42.53 | 9  | 18  | 221  | 23.6  | 7.42 |
| Q9CQ08   | U6 snRNA-associated Sm-like protein Lsm7 OS=Mus musculus GN=Lsm7 PE=3 SV=1 - [LSM7_MOUSE]                    | 64.08 | 1  | 4  | 5  | 15  | 1.570 | 0.813 | 0.942 | 0.711 | 29.77  | 64.08 | 9  | 15  | 103  | 11.6  | 5.27 |
| Q9CPW2   | Adrenodoxin-like protein, mitochondrial OS=Mus musculus GN=Fdx1l PE=2 SV=1 - [ADXL_MOUSE]                    | 14.94 | 1  | 2  | 2  | 7   | 2.342 | 1.531 | 2.125 | 0.711 | 24.51  | 14.94 | 3  | 7   | 174  | 18.8  | 6.04 |
| E9PUQ5   | Golgin subfamily A member 2 OS=Mus musculus GN=Golga2 PE=2 SV=1 -                                            | 30.21 | 11 | 24 | 26 | 76  | 1.417 | 0.782 | 0.935 | 0.712 | 207.17 | 30.21 | 42 | 76  | 1026 | 116.2 | 5.05 |
| Q8JZU0   | Nucleoside diphosphate-linked moiety X motif 13 OS=Mus musculus GN=Nudt13 PE=2 SV=2 - [NUDT13_MOUSE]         | 6.25  | 1  | 1  | 1  | 2   | 3.487 | 1.796 | 0.931 | 0.712 | 12.61  | 6.25  | 2  | 2   | 352  | 39.1  | 8.02 |
| Q6NSR8   | Probable aminopeptidase NPEPL1 OS=Mus musculus GN=Npepl1 PE=2 SV=1 - [PEPL1_MOUSE]                           | 15.46 | 2  | 8  | 8  | 28  | 2.288 | 0.646 | 0.751 | 0.712 | 91.10  | 15.46 | 15 | 28  | 524  | 55.9  | 6.84 |
| E9Q8R5   | TraB domain-containing protein OS=Mus musculus GN=Trabd PE=2 SV=1 - [E9Q8R5_MOUSE]                           | 8.13  | 3  | 2  | 2  | 5   | 0.812 | 0.835 | 0.659 | 0.712 | 12.65  | 8.13  | 3  | 5   | 320  | 36.0  | 8.31 |
| Q9CWU4   | UPF0690 protein Clorf52 homolog OS=Mus musculus PE=1 SV=1 - [CA052_MOUSE]                                    | 20.00 | 3  | 4  | 4  | 11  | 1.745 | 0.779 | 1.125 | 0.712 | 24.22  | 20.00 | 6  | 11  | 180  | 20.1  | 5.11 |
| F7C957   | PDZ and LIM domain protein 2 (Fragment) OS=Mus musculus GN=Pdlim2 PE=4 SV=1 - [F7C957_MOUSE]                 | 35.10 | 2  | 4  | 4  | 14  | 2.937 | 0.509 | 0.825 | 0.712 | 45.90  | 35.10 | 8  | 14  | 151  | 16.7  | 8.60 |

|          |                                                                                                                                 |       |   |    |    |     |       |       |       |       |        |       |    |     |      |       |       |
|----------|---------------------------------------------------------------------------------------------------------------------------------|-------|---|----|----|-----|-------|-------|-------|-------|--------|-------|----|-----|------|-------|-------|
| Q9D6F4   | Gamma-aminobutyric acid receptor subunit alpha-4<br>OS=Mus musculus<br>GN=Gabra4 PE=2 SV=1 - [GBRA4_MOUSE]                      | 10.69 | 1 | 5  | 5  | 19  | 0.650 | 0.792 | 1.110 | 0.712 | 57.62  | 10.69 | 10 | 19  | 552  | 60.8  | 9.32  |
| P62313   | U6 snRNA-associated Sm-like protein LSM6 OS=Mus musculus GN=Lsm6 PE=2 SV=1 - [LSM6_MOUSE]                                       | 55.00 | 1 | 5  | 5  | 34  | 1.466 | 0.838 | 0.895 | 0.712 | 88.93  | 55.00 | 10 | 34  | 80   | 9.1   | 9.58  |
| Q99MX7   | Cat eye syndrome critical region protein 6 homolog<br>OS=Mus musculus<br>GN=Cecr6 PE=1 SV=1 - [CECR6_MOUSE]                     | 19.23 | 1 | 6  | 6  | 28  | 0.921 | 1.485 | 1.387 | 0.713 | 101.64 | 19.23 | 9  | 28  | 572  | 58.1  | 9.01  |
| Q3TGW2   | Endonuclease/exonuclease /phosphatase family domain-containing protein 1 OS=Mus musculus<br>GN=Eepd1 PE=1 SV=1 - [EEPD1_MOUSE]  | 2.28  | 1 | 1  | 1  | 5   | 0.441 | 2.193 | 1.436 | 0.713 | 14.08  | 2.28  | 2  | 5   | 569  | 62.9  | 8.35  |
| Q99LQ4   | Coiled-coil domain-containing protein 23<br>OS=Mus musculus<br>GN=Ccdc23 PE=2 SV=1 - [CCD23_MOUSE]                              | 33.33 | 3 | 2  | 2  | 4   | 1.096 | 0.600 | 0.872 | 0.713 | 10.66  | 33.33 | 3  | 4   | 66   | 7.8   | 9.16  |
| Q8R3Q0   | Store-operated calcium entry-associated regulatory factor OS=Mus musculus GN=Tmem66 PE=2 SV=2 - [Tmem66_MOUSE]                  | 17.37 | 1 | 5  | 5  | 9   | 0.653 | 0.887 | 0.599 | 0.713 | 28.42  | 17.37 | 9  | 9   | 334  | 35.8  | 8.19  |
| Q9Z255   | E2 ubiquitin-conjugating enzyme E2 A OS=Mus musculus GN=Ube2a PE=2 SV=1 - [UBE2A_MOUSE]                                         | 11.18 | 1 | 1  | 1  | 8   | 1.525 | 0.989 | 0.746 | 0.713 | 33.91  | 11.18 | 2  | 8   | 152  | 17.3  | 5.15  |
| P14733   | Lamin-B1 OS=Mus musculus GN=Lmb1 PE=1 SV=3 - [LMNB1_MOUSE]                                                                      | 56.12 | 1 | 31 | 36 | 244 | 1.165 | 0.649 | 0.745 | 0.714 | 670.42 | 56.12 | 63 | 244 | 588  | 66.7  | 5.16  |
| Q3U962   | Collagen alpha-2(V) chain OS=Mus musculus<br>GN=Col5a2 PE=1 SV=1 - [COL5A2_MOUSE]                                               | 3.94  | 1 | 3  | 3  | 8   | 0.989 | 2.336 | 0.738 | 0.714 | 27.97  | 3.94  | 5  | 8   | 1497 | 144.9 | 6.70  |
| Q505F4   | Protein Zfp280b OS=Mus musculus GN=Zfp280b PE=2 SV=1 - [Q505F4_MOUSE]                                                           | 8.80  | 1 | 2  | 2  | 5   | 1.425 | 0.639 | 0.837 | 0.714 | 19.73  | 8.80  | 3  | 5   | 534  | 59.5  | 6.70  |
| O70251   | Elongation factor 1-beta OS=Mus musculus<br>GN=Eef1b PE=1 SV=5 - [EF1B_MOUSE]                                                   | 58.67 | 5 | 10 | 12 | 183 | 1.679 | 0.776 | 1.024 | 0.714 | 546.46 | 58.67 | 22 | 183 | 225  | 24.7  | 4.69  |
| Q62351   | Transferrin receptor protein 1 OS=Mus musculus GN=Tfrc PE=1 SV=1 - [TFR1_MOUSE]                                                 | 27.52 | 2 | 21 | 21 | 55  | 0.857 | 0.611 | 0.659 | 0.714 | 148.18 | 27.52 | 37 | 55  | 763  | 85.7  | 6.57  |
| F6YA33   | TFIIH basal transcription factor complex helicase XPD subunit (Fragment) OS=Mus musculus<br>GN=Ercc2 PE=4 SV=1 - [F6YA33_MOUSE] | 11.70 | 2 | 1  | 4  | 6   | 0.327 | 0.565 | 1.597 | 0.715 | 9.65   | 11.70 | 4  | 6   | 684  | 77.9  | 6.74  |
| Q91XE0-2 | Isoform 2 of Glycine N-acyltransferase OS=Mus musculus GN=Glyat - [GLYAT_MOUSE]                                                 | 5.34  | 2 | 1  | 1  | 1   | 0.601 | 1.178 | 1.023 | 0.715 | 2.11   | 5.34  | 1  | 1   | 262  | 30.1  | 7.80  |
| P23475   | X-ray repair cross-complementing protein 6 OS=Mus musculus<br>GN=Xrcc6 PE=1 SV=5 - [XRCC6_MOUSE]                                | 11.51 | 3 | 4  | 8  | 13  | 0.795 | 0.734 | 0.632 | 0.715 | 32.60  | 11.51 | 11 | 13  | 608  | 69.4  | 6.79  |
| Q148R4   | Protein Spink5 OS=Mus musculus GN=Spink5 PE=2 SV=1 - [Q148R4_MOUSE]                                                             | 2.26  | 1 | 2  | 2  | 2   | 1.026 | 0.637 | 0.885 | 0.715 | 4.79   | 2.26  | 2  | 2   | 1017 | 114.8 | 8.29  |
| P08003   | Protein disulfide-isomerase A4 OS=Mus musculus<br>GN=Pdia4 PE=1 SV=3 - [PDIA4_MOUSE]                                            | 50.47 | 3 | 33 | 34 | 157 | 1.178 | 0.681 | 0.787 | 0.715 | 436.40 | 50.47 | 59 | 157 | 638  | 71.9  | 5.31  |
| Q9CR89-2 | Isoform 2 of Endoplasmic reticulum-Golgi intermediate compartment protein 2 OS=Mus musculus GN=Ergic2 - [ERGIC2_MOUSE]          | 15.56 | 2 | 3  | 3  | 4   | 0.384 | 0.817 | 0.726 | 0.716 | 8.80   | 15.56 | 4  | 4   | 302  | 34.2  | 6.89  |
| Q99LJ6   | Glutathione peroxidase 7 OS=Mus musculus<br>GN=Gpx7 PE=2 SV=1 - [GPX7_MOUSE]                                                    | 22.58 | 1 | 4  | 5  | 15  | 0.771 | 0.786 | 0.536 | 0.716 | 38.56  | 22.58 | 8  | 15  | 186  | 21.0  | 8.27  |
| Q8BZ4+2  | Isoform 2 of Splicing regulatory glutamine/lysine-rich protein 1 OS=Mus musculus GN=Srek1 - [SREK1_MOUSE]                       | 4.43  | 2 | 2  | 2  | 8   | 0.298 | 0.781 | 0.670 | 0.716 | 33.95  | 4.43  | 4  | 8   | 610  | 69.1  | 10.27 |
| Q8BTQ0   | Polycomb group RING finger protein 3 OS=Mus musculus GN=Pcgf3 PE=2 SV=1 - [PCGF3_MOUSE]                                         | 8.30  | 1 | 1  | 1  | 2   | 1.778 | 1.219 | 1.098 | 0.716 | 0.00   | 8.30  | 1  | 2   | 241  | 28.0  | 8.22  |
| Q923Q2   | STAR-related lipid transfer protein 13 OS=Mus musculus GN=Stard13 PE=1 SV=5 - [STARD13_MOUSE]                                   | 2.34  | 2 | 2  | 2  | 3   | 2.224 | 0.832 | 0.687 | 0.716 | 8.70   | 2.34  | 3  | 3   | 1113 | 125.0 | 7.53  |
| Q3UZ39   | Leucine-rich repeat flightless-interacting protein 1 OS=Mus musculus GN=Lrrfp1 PE=1 SV=2 - [LRRFP1_MOUSE]                       | 16.19 | 2 | 2  | 8  | 31  | 0.571 | 0.934 | 1.108 | 0.716 | 81.36  | 16.19 | 13 | 31  | 729  | 79.2  | 4.82  |

|          |                                                                                                                                                 |       |    |    |    |    |       |       |       |       |        |       |    |    |      |       |      |
|----------|-------------------------------------------------------------------------------------------------------------------------------------------------|-------|----|----|----|----|-------|-------|-------|-------|--------|-------|----|----|------|-------|------|
| Q5SUF2   | Luc7-like protein 3<br>OS=Mus musculus<br>GN=Luc7l3 PE=1 SV=1 -<br>[LC7L3_MOUSE]                                                                | 13.89 | 3  | 5  | 6  | 20 | 0.850 | 0.815 | 0.809 | 0.716 | 44.59  | 13.89 | 10 | 20 | 432  | 51.4  | 9.77 |
| Q3V0Y1   | Putative SMEK homolog 3<br>OS=Mus musculus<br>GN=Smek3p PE=5 SV=2 -<br>[SMEK3_MOUSE]                                                            | 6.27  | 1  | 2  | 2  | 4  | 0.515 | 1.451 | 2.281 | 0.716 | 2.27   | 6.27  | 2  | 4  | 813  | 95.4  | 5.85 |
| Q8BLU0   | Fibronectin leucine rich<br>transmembrane protein 2<br>OS=Mus musculus<br>GN=Firt2 PE=2 SV=1 -<br>[Q8BLU0_MOUSE]                                | 6.36  | 1  | 2  | 2  | 19 | 1.400 | 1.188 | 0.865 | 0.717 | 12.80  | 6.36  | 4  | 19 | 660  | 73.9  | 7.91 |
| Q921H9   | Sel1 repeat-containing<br>protein 1 OS=Mus<br>musculus GN=Selrc1 PE=1<br>SV=1 - [SELR1_MOUSE]                                                   | 44.16 | 1  | 8  | 8  | 33 | 1.360 | 0.672 | 0.897 | 0.717 | 95.58  | 44.16 | 15 | 33 | 231  | 25.6  | 6.29 |
| Q8BUR9   | Mitotic-spindle organizing<br>protein 1 OS=Mus<br>musculus GN=Mzt1 PE=1<br>SV=1 - [MZT1_MOUSE]                                                  | 55.13 | 1  | 3  | 3  | 6  | 0.947 | 0.711 | 0.960 | 0.717 | 25.65  | 55.13 | 5  | 6  | 78   | 8.1   | 4.78 |
| Q51012-4 | Isoform 4 of Putative<br>sodium-coupled neutral<br>amino acid transporter 10<br>OS=Mus musculus<br>GN=Slc38a10 -<br>[SLC38A10_MOUSE]            | 8.14  | 5  | 7  | 8  | 10 | 1.352 | 1.024 | 0.635 | 0.717 | 27.56  | 8.14  | 9  | 10 | 1081 | 116.2 | 5.90 |
| Q62010   | Oviduct-specific<br>glycoprotein OS=Mus<br>musculus GN=Ovgp1<br>PE=2 SV=1 -                                                                     | 1.94  | 1  | 2  | 2  | 2  | 1.194 | 0.488 | 0.603 | 0.717 | 4.47   | 1.94  | 2  | 2  | 721  | 78.8  | 9.19 |
| P11688   | Integrin alpha-5 OS=Mus<br>musculus GN=Itga5 PE=1<br>SV=3 - [ITA5_MOUSE]                                                                        | 6.08  | 1  | 6  | 6  | 9  | 0.977 | 1.096 | 1.131 | 0.717 | 18.48  | 6.08  | 8  | 9  | 1053 | 115.0 | 5.95 |
| Q6PCS8   | Protein Zbtb40 OS=Mus<br>musculus GN=Zbtb40<br>PE=2 SV=1 -<br>[Q6PCS8_MOUSE]                                                                    | 1.43  | 1  | 1  | 1  | 1  | 2.492 | 0.587 | 0.641 | 0.717 | 2.69   | 1.43  | 1  | 1  | 1258 | 138.1 | 6.15 |
| P06537-3 | Isoform 1-B of<br>Glucocorticoid receptor<br>OS=Mus musculus<br>GN=Nr3c1 -                                                                      | 23.81 | 8  | 13 | 13 | 32 | 1.196 | 0.950 | 0.811 | 0.717 | 97.66  | 23.81 | 21 | 32 | 756  | 83.2  | 6.34 |
| Q8R4G6   | Alpha-1,6-<br>mannosylglycoprotein 6-<br>beta-N-<br>acetylglucosaminyltransfer<br>ase A OS=Mus musculus<br>GN=Nga5 PE=2 SV=1 -<br>[MGT5A_MOUSE] | 10.00 | 1  | 4  | 5  | 14 | 0.741 | 0.653 | 0.658 | 0.718 | 27.47  | 10.00 | 8  | 14 | 740  | 84.5  | 8.19 |
| Q91XD7   | Cysteine-rich with EGF-like<br>domain protein 1 OS=Mus<br>musculus GN=Cred1 PE=2<br>SV=1 - [CREL1_MOUSE]                                        | 20.95 | 1  | 9  | 9  | 30 | 0.755 | 0.779 | 0.686 | 0.718 | 86.88  | 20.95 | 16 | 30 | 420  | 45.7  | 5.02 |
| E9Q088   | X-ray repair cross-<br>complementing protein 6<br>(Fragment) OS=Mus<br>musculus GN=Xrcc6 PE=2<br>SV=1 - [E9Q088_MOUSE]                          | 14.75 | 2  | 1  | 3  | 4  | 3.387 | 1.363 | 0.437 | 0.718 | 13.89  | 14.75 | 4  | 4  | 217  | 24.7  | 5.11 |
| Q3UMG5-2 | Isoform 2 of Leucine-rich<br>repeat and calponin<br>homology domain-<br>containing protein 2<br>OS=Mus musculus<br>GN=Lrch2 -<br>[LRCH2_MOUSE]  | 6.92  | 6  | 2  | 2  | 3  | 0.854 | 1.435 | 0.518 | 0.718 | 5.72   | 6.92  | 3  | 3  | 751  | 82.3  | 6.33 |
| P0C7T6   | Ataxin-1-like OS=Mus<br>musculus GN=Abxn1 PE=1<br>SV=1 - [ATX1L_MOUSE]                                                                          | 5.82  | 1  | 4  | 4  | 15 | 1.729 | 1.092 | 1.204 | 0.718 | 42.22  | 5.82  | 6  | 15 | 687  | 73.3  | 6.49 |
| A2ASR8   | Double-stranded RNA-<br>binding protein Staufen<br>homolog 1 OS=Mus<br>musculus GN=Stau1 PE=2<br>SV=1 - [A2ASR8_MOUSE]                          | 34.43 | 4  | 14 | 15 | 31 | 0.640 | 0.377 | 0.889 | 0.718 | 90.23  | 34.43 | 26 | 31 | 485  | 53.7  | 9.55 |
| Q922G2   | Protein FAM76a OS=Mus<br>musculus GN=Fam76a<br>PE=2 SV=1 -<br>[FA76A_MOUSE]                                                                     | 23.78 | 3  | 4  | 6  | 10 | 0.805 | 0.603 | 1.167 | 0.718 | 23.62  | 23.78 | 7  | 10 | 307  | 35.1  | 9.19 |
| E1U8D0   | Protein SOGA1 OS=Mus<br>musculus GN=Soga1 PE=1<br>SV=3 - [SOGA1_MOUSE]                                                                          | 12.48 | 2  | 12 | 14 | 39 | 0.980 | 0.521 | 0.858 | 0.719 | 118.71 | 12.48 | 23 | 39 | 1418 | 159.1 | 6.46 |
| Q64444   | Carbonic anhydrase 4<br>OS=Mus musculus<br>GN=Ca4 PE=1 SV=1 -<br>[CAH4_MOUSE]                                                                   | 26.56 | 2  | 6  | 6  | 29 | 1.008 | 1.443 | 1.000 | 0.719 | 88.65  | 26.56 | 9  | 29 | 305  | 34.3  | 8.21 |
| Q8R3N6   | THO complex subunit 1<br>OS=Mus musculus<br>GN=Thoc1 PE=1 SV=1 -<br>[THOC1_MOUSE]                                                               | 9.59  | 1  | 5  | 5  | 13 | 1.477 | 0.806 | 1.031 | 0.719 | 27.39  | 9.59  | 8  | 13 | 657  | 75.4  | 4.97 |
| Q9ESZ8-5 | Isoform 5 of General<br>transcription factor II-1<br>OS=Mus musculus<br>GN=Gtf2i -                                                              | 41.96 | 13 | 31 | 32 | 75 | 0.742 | 0.924 | 0.682 | 0.719 | 224.80 | 41.96 | 49 | 75 | 939  | 106.0 | 8.47 |
| Q6P539   | Protein FAM222b OS=Mus<br>musculus GN=Fam222b<br>PE=2 SV=2 -<br>[F222B_MOUSE]                                                                   | 7.30  | 2  | 3  | 3  | 6  | 1.539 | 1.123 | 1.174 | 0.719 | 15.66  | 7.30  | 5  | 6  | 562  | 59.6  | 9.23 |
| O09106   | Histone deacetylase 1<br>OS=Mus musculus<br>GN=Hdac1 PE=1 SV=1 -<br>[HDAC1_MOUSE]                                                               | 25.10 | 2  | 4  | 10 | 33 | 0.558 | 0.864 | 0.537 | 0.719 | 82.71  | 25.10 | 17 | 33 | 482  | 55.0  | 5.48 |
| Q8BGJ5   | MCG13402, isoform CRA_a<br>OS=Mus musculus<br>GN=Ptpb1 PE=2 SV=1 -<br>[Q8BGJ5_MOUSE]                                                            | 27.22 | 9  | 8  | 10 | 43 | 0.961 | 0.908 | 0.540 | 0.719 | 119.02 | 27.22 | 18 | 43 | 529  | 56.9  | 9.17 |
| P60764   | Ras-related C3 botulinum<br>toxin substrate 3 OS=Mus<br>musculus GN=Rac3 PE=1<br>SV=1 - [RAC3_MOUSE]                                            | 42.71 | 8  | 4  | 10 | 79 | 0.606 | 0.679 | 0.511 | 0.719 | 226.30 | 42.71 | 18 | 79 | 192  | 21.4  | 8.15 |

|          |                                                                                                       |       |    |    |    |     |       |       |       |       |        |       |     |     |      |       |       |
|----------|-------------------------------------------------------------------------------------------------------|-------|----|----|----|-----|-------|-------|-------|-------|--------|-------|-----|-----|------|-------|-------|
| Q3URU2   | Paternally-expressed gene 3 protein OS=Mus musculus GN=Peg3 PE=1 SV=1 - [PEG3_MOUSE]                  | 8.40  | 1  | 3  | 10 | 18  | 1.459 | 0.811 | 0.656 | 0.720 | 42.28  | 8.40  | 14  | 18  | 1571 | 178.8 | 5.45  |
| A2AM05-4 | Isoform 4 of Centinle OS=Mus musculus GN=Cntln - [CNTLN_MOUSE]                                        | 1.50  | 3  | 1  | 3  | 3   | 0.958 | 1.392 | 0.605 | 0.720 | 5.32   | 1.50  | 3   | 3   | 1396 | 160.6 | 7.99  |
| Q3TQI7   | Uncharacterized protein C9orf78 homolog OS=Mus musculus PE=1 SV=2 - [C1078_MOUSE]                     | 11.76 | 1  | 3  | 3  | 11  | 1.607 | 0.692 | 0.993 | 0.720 | 35.25  | 11.76 | 6   | 11  | 289  | 33.5  | 6.34  |
| Q9CY50   | Translocation-associated protein subunit alpha OS=Mus musculus GN=Ssr1 PE=1 SV=1 - [SSRA_MOUSE]       | 23.43 | 1  | 4  | 4  | 31  | 0.596 | 0.791 | 0.644 | 0.720 | 93.37  | 23.43 | 8   | 31  | 286  | 32.0  | 4.45  |
| Q61183-4 | Isoform 4 of Poly(A) polymerase alpha OS=Mus musculus GN=Papola - [PAPOA_MOUSE]                       | 7.46  | 13 | 3  | 4  | 5   | 0.685 | 0.702 | 0.673 | 0.720 | 7.23   | 7.46  | 5   | 5   | 657  | 72.8  | 8.07  |
| Q9R0S3   | Matrix metalloproteinase-17 OS=Mus musculus GN=Mmp17 PE=1 SV=3 - [MMP17_MOUSE]                        | 3.81  | 1  | 1  | 1  | 2   | 2.515 | 1.088 | 0.826 | 0.720 | 9.39   | 3.81  | 1   | 2   | 578  | 64.3  | 6.38  |
| P35922-9 | Isoform ISO9 of Fragile X mental retardation protein 1 homolog OS=Mus musculus GN=Fmr1 - [FMR1_MOUSE] | 25.53 | 18 | 10 | 14 | 70  | 0.954 | 0.877 | 0.934 | 0.721 | 178.87 | 25.53 | 24  | 70  | 568  | 64.1  | 8.53  |
| Q9CQ5    | ZW10 interactor OS=Mus musculus GN=Zwint PE=2 SV=1 - [ZWINT_MOUSE]                                    | 46.03 | 1  | 12 | 12 | 47  | 0.810 | 0.782 | 0.757 | 0.721 | 118.29 | 46.03 | 21  | 47  | 252  | 28.7  | 8.43  |
| A2A1Y2   | Collagen alpha-1(XV) chain OS=Mus musculus GN=Col15a1 PE=2 SV=1 - [A2A1Y2_MOUSE]                      | 3.05  | 4  | 4  | 4  | 7   | 1.565 | 0.886 | 0.771 | 0.721 | 17.41  | 3.05  | 6   | 7   | 1345 | 138.2 | 4.88  |
| Q9J1N6   | Beta-catenin-interacting protein 1 OS=Mus musculus GN=Ctnnbip1 PE=1 SV=1 -                            | 69.14 | 1  | 4  | 4  | 20  | 1.878 | 0.693 | 0.922 | 0.721 | 61.55  | 69.14 | 8   | 20  | 81   | 9.2   | 5.41  |
| Q8K2C7-2 | Isoform 2 of Protein OS-9 OS=Mus musculus GN=OS9 - [OS9_MOUSE]                                        | 21.72 | 3  | 11 | 12 | 34  | 1.707 | 0.949 | 0.949 | 0.722 | 93.69  | 21.72 | 18  | 34  | 617  | 69.7  | 4.83  |
| D3Z2Z1   | CAP-Gly domain-containing linker protein 1 OS=Mus musculus GN=Clip1 PE=2 SV=1 - [D3Z2Z1_MOUSE]        | 47.62 | 6  | 2  | 67 | 268 | 1.737 | 1.123 | 2.006 | 0.722 | 751.17 | 47.62 | 118 | 268 | 1426 | 159.9 | 5.26  |
| P63325   | 40S ribosomal protein S10 OS=Mus musculus GN=Rps10 PE=1 SV=1 - [RS10_MOUSE]                           | 60.00 | 3  | 13 | 13 | 78  | 0.869 | 0.709 | 0.690 | 0.722 | 207.82 | 60.00 | 23  | 78  | 165  | 18.9  | 10.15 |
| A2A484   | Protein Zmynd8 OS=Mus musculus GN=Zmynd8 PE=2 SV=1 - [A2A484_MOUSE]                                   | 10.45 | 11 | 11 | 12 | 31  | 1.106 | 0.832 | 0.799 | 0.722 | 70.38  | 10.45 | 19  | 31  | 1235 | 136.9 | 7.52  |
| F6V8M6   | Ataxin-2 (Fragment) OS=Mus musculus GN=Abxn2 PE=2 SV=1 - [F6V8M6_MOUSE]                               | 20.05 | 1  | 1  | 8  | 28  | 1.183 | 0.606 | 0.836 | 0.722 | 94.53  | 20.05 | 13  | 28  | 399  | 42.8  | 8.95  |
| Q9QXAS   | U6 snRNA-associated Sm-like protein LSM4 OS=Mus musculus GN=Lsm4 PE=2 SV=1 - [LSM4_MOUSE]             | 27.01 | 3  | 4  | 4  | 9   | 1.827 | 0.754 | 0.858 | 0.723 | 16.35  | 27.01 | 6   | 9   | 137  | 15.1  | 10.05 |
| Q6NZB0   | DnaJ homolog subfamily C member 8 OS=Mus musculus GN=Dnajc8 PE=2 SV=2 -                               | 24.90 | 8  | 8  | 8  | 22  | 0.984 | 0.384 | 1.026 | 0.723 | 52.88  | 24.90 | 14  | 22  | 253  | 29.8  | 9.06  |
| Q8C7E9   | Cleavage stimulation factor subunit 2 tau variant OS=Mus musculus GN=Cstf2t PE=1 SV=2 - [CSTFT_MOUSE] | 34.81 | 1  | 9  | 14 | 38  | 1.820 | 1.097 | 1.021 | 0.723 | 122.97 | 34.81 | 21  | 38  | 632  | 65.8  | 7.25  |
| P0CW02   | Lymphocyte antigen 6C1 OS=Mus musculus GN=Ly6c1 PE=2 SV=1 - [LY6C1_MOUSE]                             | 14.50 | 2  | 1  | 1  | 1   | 1.152 | 0.594 | 0.877 | 0.723 | 5.07   | 14.50 | 1   | 1   | 131  | 14.2  | 6.01  |
| Q60848-2 | Isoform 2 of Lymphocyte-specific helicase OS=Mus musculus GN=Hells - [HELLS_MOUSE]                    | 1.98  | 2  | 1  | 2  | 3   | 0.309 | 0.187 | 0.809 | 0.723 | 7.16   | 1.98  | 2   | 3   | 808  | 93.7  | 8.19  |
| Q8CFN5-3 | Isoform 3 of Myocyte-specific enhancer factor 2C OS=Mus musculus GN=Mef2c - [MEF2C_MOUSE]             | 6.33  | 6  | 1  | 3  | 4   | 0.478 | 2.213 | 1.872 | 0.723 | 10.10  | 6.33  | 3   | 4   | 442  | 47.9  | 7.84  |
| Q8C407   | Protein YIPF4 OS=Mus musculus GN=Yipf4 PE=2 SV=1 - [YIPF4_MOUSE]                                      | 8.13  | 2  | 2  | 2  | 6   | 0.722 | 0.853 | 0.651 | 0.724 | 14.28  | 8.13  | 4   | 6   | 246  | 27.3  | 4.65  |
| P83877   | Thioredoxin-like protein 4A OS=Mus musculus GN=Txn14a PE=2 SV=1 - [TXN14A_MOUSE]                      | 38.03 | 2  | 5  | 5  | 13  | 1.483 | 1.267 | 0.794 | 0.724 | 25.45  | 38.03 | 8   | 13  | 142  | 16.8  | 5.85  |
| Q8CCK0   | Core histone macro-H2A.2 OS=Mus musculus GN=H2afy2 PE=1 SV=3 - [H2AW_MOUSE]                           | 48.92 | 1  | 14 | 16 | 92  | 0.539 | 0.731 | 0.630 | 0.724 | 308.51 | 48.92 | 28  | 92  | 372  | 40.1  | 9.69  |
| Q61686   | Chromobox protein homolog 5 OS=Mus musculus GN=Cbx5 PE=1 SV=1 - [CBX5_MOUSE]                          | 45.55 | 2  | 7  | 8  | 21  | 0.711 | 0.515 | 0.745 | 0.724 | 58.85  | 45.55 | 15  | 21  | 191  | 22.2  | 5.86  |
| G3UXI2   | Transmembrane protein 127 (Fragment) OS=Mus musculus GN=Tmem127 PE=2 SV=1 - [G3UXI2_MOUSE]            | 6.85  | 2  | 1  | 1  | 3   | 0.490 | 0.624 | 0.735 | 0.724 | 5.53   | 6.85  | 2   | 3   | 146  | 15.4  | 9.22  |



|          |                                                                                                               |       |   |    |    |     |       |       |       |       |         |       |     |     |      |       |      |
|----------|---------------------------------------------------------------------------------------------------------------|-------|---|----|----|-----|-------|-------|-------|-------|---------|-------|-----|-----|------|-------|------|
| P13020-2 | Isoform 2 of Gelsolin<br>OS=Mus musculus<br>GN=Gsn - [GELS_MOUSE]                                             | 49.25 | 3 | 27 | 28 | 146 | 1.723 | 0.467 | 0.689 | 0.725 | 437.24  | 49.25 | 49  | 146 | 731  | 80.7  | 5.76 |
| Q9D8T4   | Golgi apparatus membrane protein TVP23 homolog B<br>OS=Mus musculus<br>GN=Typ23b PE=1 SV=1 - [TV23B_MOUSE]    | 11.71 | 2 | 3  | 3  | 4   | 0.531 | 0.746 | 0.713 | 0.725 | 7.86    | 11.71 | 4   | 4   | 205  | 23.3  | 8.34 |
| Q00420-3 | Isoform 3 of GA-binding protein subunit beta-1<br>OS=Mus musculus<br>GN=Gabpb1 -                              | 4.19  | 9 | 1  | 2  | 2   | 1.046 | 1.151 | 0.700 | 0.725 | 2.11    | 4.19  | 2   | 2   | 382  | 41.2  | 4.84 |
| G3V018   | Heterogeneous nuclear ribonucleoprotein Q<br>OS=Mus musculus<br>GN=Syncrip PE=2 SV=1 - [G3V018_MOUSE]         | 46.09 | 5 | 19 | 24 | 166 | 1.003 | 0.801 | 0.973 | 0.725 | 467.07  | 46.09 | 45  | 166 | 588  | 65.7  | 8.60 |
| Q8K3D3-2 | Isoform 2 of DNA repair protein SWI5 homolog<br>OS=Mus musculus<br>GN=Swi5 -                                  | 41.32 | 3 | 3  | 4  | 18  | 1.614 | 1.102 | 1.008 | 0.725 | 36.33   | 41.32 | 5   | 18  | 121  | 13.8  | 5.17 |
| J3QNA8   | Protein Rnpepl1 (Fragment)<br>OS=Mus musculus<br>GN=Rnpepl1 PE=4 SV=1 -                                       | 10.53 | 3 | 2  | 2  | 3   | 17921 | 1.669 | 1.059 | 0.725 | 6.12    | 10.53 | 2   | 3   | 133  | 14.8  | 4.82 |
| E0CX30   | Zinc finger protein ZFAT<br>OS=Mus musculus<br>GN=Zfat PE=2 SV=1 - [E0CX30_MOUSE]                             | 1.13  | 3 | 1  | 2  | 2   | 2.379 | 1.711 | 1.285 | 0.725 | 5.76    | 1.13  | 2   | 2   | 1152 | 128.9 | 7.62 |
| Q8K352   | SAM and SH3 domain-containing protein 3<br>OS=Mus musculus<br>GN=Sash3 PE=2 SV=2 - [SASH3_MOUSE]              | 2.11  | 1 | 1  | 1  | 2   | 1.012 | 0.580 | 1.161 | 0.725 | 6.53    | 2.11  | 2   | 2   | 380  | 41.6  | 5.22 |
| O35544   | Excitatory amino acid transporter 4<br>OS=Mus musculus<br>GN=Slc1a6 PE=2 SV=1 -                               | 14.97 | 1 | 4  | 6  | 73  | 0.639 | 0.877 | 1.372 | 0.726 | 201.96  | 14.97 | 10  | 73  | 561  | 60.7  | 8.75 |
| Q6ZWM4   | N-alpha-acetyltransferase 38, NatC auxiliary subunit<br>OS=Mus musculus<br>GN=Naa38 PE=3 SV=3 - [NAA38_MOUSE] | 81.25 | 1 | 5  | 5  | 35  | 2.292 | 0.899 | 1.063 | 0.726 | 142.72  | 81.25 | 9   | 35  | 96   | 10.4  | 4.48 |
| D3YUJ3   | Protein Ccny1<br>OS=Mus musculus<br>GN=Ccny1 PE=2 SV=1 - [D3YUJ3_MOUSE]                                       | 20.98 | 2 | 5  | 7  | 16  | 0.909 | 0.799 | 0.907 | 0.726 | 39.54   | 20.98 | 12  | 16  | 367  | 41.6  | 6.34 |
| P12961   | Neuroendocrine protein 7B2<br>OS=Mus musculus<br>GN=Scg5 PE=1 SV=1 - [7B2_MOUSE]                              | 25.47 | 1 | 3  | 4  | 28  | 1.442 | 0.929 | 0.942 | 0.726 | 87.51   | 25.47 | 6   | 28  | 212  | 23.9  | 5.81 |
| F6WPW1   | Polyprenol reductase<br>OS=Mus musculus<br>GN=Srd5a3 PE=4 SV=1 - [F6WPW1_MOUSE]                               | 3.40  | 2 | 1  | 1  | 1   | 1.414 | 1.129 | 0.985 | 0.726 | 1.99    | 3.40  | 1   | 1   | 206  | 24.1  | 9.54 |
| Q9CQK7   | RWD domain-containing protein 1<br>OS=Mus musculus<br>GN=Rwdd1 PE=1 SV=1 -                                    | 9.88  | 1 | 3  | 3  | 12  | 1.707 | 1.138 | 1.007 | 0.726 | 27.32   | 9.88  | 5   | 12  | 243  | 27.8  | 4.26 |
| Q99M08   | Uncharacterized protein C4orf3 homolog<br>OS=Mus musculus<br>PE=1 SV=1 - [CD003_MOUSE]                        | 24.62 | 1 | 1  | 1  | 4   | 0.841 | 0.686 | 0.778 | 0.727 | 12.61   | 24.62 | 2   | 4   | 65   | 7.4   | 5.24 |
| Q99KF1   | Transmembrane emp24 domain-containing protein 9<br>OS=Mus musculus<br>GN=Tmed9 PE=2 SV=2 - [TMED9_MOUSE]      | 27.66 | 1 | 6  | 7  | 41  | 0.652 | 0.883 | 0.666 | 0.727 | 102.35  | 27.66 | 12  | 41  | 235  | 27.1  | 8.41 |
| H3BKCS   | U6 snRNA-associated Sm-like protein LSm5 (Fragment)<br>OS=Mus musculus<br>GN=Lsm5 PE=2 SV=1 - [H3BKCS_MOUSE]  | 52.38 | 2 | 2  | 2  | 6   | 1.433 | 0.920 | 1.021 | 0.727 | 8.79    | 52.38 | 4   | 6   | 42   | 4.6   | 5.10 |
| Q8K2T8   | RNA polymerase II-associated factor 1 homolog<br>OS=Mus musculus<br>GN=Paf1 PE=2 SV=1 - [PAF1_MOUSE]          | 18.50 | 1 | 8  | 8  | 18  | 2.424 | 0.885 | 0.888 | 0.727 | 45.91   | 18.50 | 11  | 18  | 535  | 60.5  | 4.65 |
| Q3ULZ2   | FH2 domain-containing protein 1<br>OS=Mus musculus<br>GN=Fhdcl1 PE=2 SV=3 - [FHDC1_MOUSE]                     | 3.48  | 1 | 3  | 3  | 4   | 2.137 | 0.872 | 1.917 | 0.727 | 5.33    | 3.48  | 3   | 4   | 1149 | 125.3 | 8.82 |
| Q9D3P8   | Plasminogen receptor (KT)<br>OS=Mus musculus<br>GN=Plgrkt PE=1 SV=1 - [PLRKT_MOUSE]                           | 19.05 | 4 | 3  | 3  | 13  | 0.470 | 0.890 | 0.672 | 0.727 | 34.95   | 19.05 | 5   | 13  | 147  | 17.2  | 9.50 |
| Q8N7N5   | DDB1- and CUI4-associated factor 8<br>OS=Mus musculus<br>GN=Dca8 PE=1 SV=1 -                                  | 8.63  | 2 | 4  | 4  | 7   | 0.827 | 0.687 | 0.795 | 0.728 | 16.61   | 8.63  | 7   | 7   | 591  | 66.0  | 5.87 |
| E9Q4M8   | Delta(14)-sterol reductase<br>OS=Mus musculus<br>GN=Tm7sf2 PE=2 SV=1 - [E9Q4M8_MOUSE]                         | 8.77  | 7 | 3  | 3  | 4   | 0.992 | 0.568 | 0.703 | 0.728 | 10.42   | 8.77  | 4   | 4   | 399  | 43.4  | 8.65 |
| Q61586   | Glycerol-3-phosphate acyltransferase 1, mitochondrial<br>OS=Mus musculus<br>GN=Gpam PE=1 SV=2 - [GPAT1_MOUSE] | 6.05  | 1 | 3  | 3  | 5   | 0.671 | 1.607 | 1.560 | 0.728 | 18.51   | 6.05  | 4   | 5   | 827  | 93.6  | 7.84 |
| P08030   | Adenine phosphoribosyltransferase<br>OS=Mus musculus<br>GN=Aprt PE=2 SV=2 -                                   | 43.89 | 1 | 8  | 8  | 21  | 1.383 | 1.435 | 0.562 | 0.728 | 54.39   | 43.89 | 14  | 21  | 180  | 19.7  | 6.79 |
| Q7TPR4   | Alpha-actinin-1<br>OS=Mus musculus<br>GN=Actn1 PE=1 SV=1 - [ACTN1_MOUSE]                                      | 66.37 | 2 | 1  | 56 | 556 | 0.632 | 2.249 | 1.737 | 0.728 | 1486.37 | 66.37 | 103 | 556 | 892  | 103.0 | 5.38 |

|          |                                                                                                                                                 |       |   |    |    |     |       |       |       |       |        |       |    |     |      |       |       |
|----------|-------------------------------------------------------------------------------------------------------------------------------------------------|-------|---|----|----|-----|-------|-------|-------|-------|--------|-------|----|-----|------|-------|-------|
| Q61624   | Zinc finger protein 148<br>OS=Mus musculus<br>GN=Znf148 PE=1 SV=2 -<br>[ZN148_MOUSE]                                                            | 13.73 | 1 | 7  | 7  | 11  | 2.423 | 0.986 | 1.149 | 0.729 | 30.58  | 13.73 | 9  | 11  | 794  | 88.7  | 6.48  |
| Q8R035   | Peptidyl-RNA hydrolase<br>ICT1, mitochondrial<br>OS=Mus musculus<br>GN=Ict1 PE=1 SV=1 -<br>[ICT1_MOUSE]                                         | 49.03 | 4 | 9  | 10 | 22  | 0.920 | 0.505 | 0.898 | 0.729 | 68.01  | 49.03 | 17 | 22  | 206  | 23.5  | 10.18 |
| P33215-2 | isoform 2 of Protein<br>NEDD1 OS=Mus musculus<br>GN=Nedd1 -<br>[NEDD1_MOUSE]                                                                    | 3.54  | 2 | 1  | 1  | 2   | 1.851 | 1.029 | 0.859 | 0.729 | 3.37   | 3.54  | 1  | 2   | 508  | 54.3  | 8.53  |
| P46978   | Dolichyl-<br>diphosphooligosaccharide-<br>protein glycosyltransferase<br>subunit STT3A OS=Mus<br>musculus GN=Stt3a PE=1<br>SV=1 - [STT3A_MOUSE] | 14.04 | 2 | 10 | 12 | 32  | 0.685 | 0.855 | 0.642 | 0.729 | 83.99  | 14.04 | 20 | 32  | 705  | 80.5  | 8.10  |
| D3YVFO   | A-kinase anchor protein 5<br>OS=Mus musculus<br>GN=Akap5 PE=2 SV=2 -<br>[AKAP5_MOUSE]                                                           | 40.00 | 2 | 20 | 20 | 101 | 1.258 | 2.705 | 2.945 | 0.729 | 282.11 | 40.00 | 34 | 101 | 745  | 79.3  | 4.75  |
| F8WJ39   | Myelin regulatory factor<br>OS=Mus musculus<br>GN=Myrf PE=4 SV=1 -<br>[F8WJ39_MOUSE]                                                            | 0.90  | 2 | 1  | 1  | 1   | 1.654 | 0.498 | 0.632 | 0.729 | 2.29   | 0.90  | 1  | 1   | 1112 | 120.6 | 7.33  |
| Q7TNR6   | Immunoglobulin<br>superfamily member 21<br>OS=Mus musculus<br>GN=Igsf21 PE=2 SV=1 -<br>[IGS21_MOUSE]                                            | 31.62 | 1 | 12 | 13 | 40  | 0.771 | 0.813 | 0.886 | 0.729 | 126.36 | 31.62 | 23 | 40  | 468  | 51.9  | 6.95  |
| Q60598   | Src substrate cortactin<br>OS=Mus musculus<br>GN=Ctn PE=1 SV=2 -<br>[SRC8_MOUSE]                                                                | 54.03 | 2 | 28 | 28 | 215 | 1.547 | 1.080 | 1.235 | 0.729 | 566.82 | 54.03 | 47 | 215 | 546  | 61.2  | 5.40  |
| Q69ZL1   | FYVE, RhoGEF and PH<br>domain-containing protein<br>6 OS=Mus musculus<br>GN=Fgd6 PE=1 SV=2 -<br>[FGD6_MOUSE]                                    | 3.50  | 2 | 5  | 5  | 5   | 5.658 | 1.570 | 1.704 | 0.729 | 12.96  | 3.50  | 5  | 5   | 1399 | 155.1 | 7.87  |
| Q8BS16   | R3H and coiled-coil<br>domain-containing protein<br>1 OS=Mus musculus<br>GN=R3hcc1 PE=2 SV=2 -<br>[R3HCC1_MOUSE]                                | 8.05  | 2 | 3  | 3  | 4   | 2.598 | 1.548 | 0.924 | 0.730 | 10.92  | 8.05  | 4  | 4   | 596  | 65.7  | 5.44  |
| Q62086   | Serum<br>paraoxonase/arylesterase<br>2 OS=Mus musculus<br>GN=Pon2 PE=1 SV=2 -<br>[PON2_MOUSE]                                                   | 17.23 | 1 | 4  | 4  | 14  | 0.704 | 0.622 | 0.608 | 0.730 | 32.87  | 17.23 | 8  | 14  | 354  | 39.6  | 5.83  |
| Q07813   | Apoptosis regulator BAX<br>OS=Mus musculus<br>GN=Bax PE=1 SV=1 -<br>[BAX_MOUSE]                                                                 | 33.33 | 1 | 5  | 5  | 21  | 0.874 | 1.015 | 0.724 | 0.730 | 69.75  | 33.33 | 8  | 21  | 192  | 21.4  | 4.98  |
| O08738   | Caspase-6 OS=Mus<br>musculus GN=Casp6 PE=2<br>SV=1 - [CASP6_MOUSE]                                                                              | 7.25  | 1 | 2  | 2  | 3   | 1.464 | 1.567 | 0.683 | 0.731 | 10.35  | 7.25  | 3  | 3   | 276  | 31.6  | 6.89  |
| Q7TQA1-5 | Isoform 5 of<br>Immunoglobulin<br>superfamily member 1<br>OS=Mus musculus<br>GN=Igsf1 -<br>[IGS1_MOUSE]                                         | 12.52 | 4 | 11 | 11 | 50  | 0.869 | 0.500 | 0.440 | 0.731 | 137.14 | 12.52 | 18 | 50  | 775  | 85.1  | 5.00  |
| O09164   | Extracellular superoxide<br>dismutase [Cu-Zn]<br>OS=Mus musculus<br>GN=Sod3 PE=1 SV=1 -<br>[SODE_MOUSE]                                         | 19.12 | 1 | 4  | 4  | 9   | 1.918 | 0.812 | 0.833 | 0.731 | 25.38  | 19.12 | 7  | 9   | 251  | 27.4  | 6.84  |
| O89020   | Afamin OS=Mus musculus<br>GN=Afm PE=1 SV=2 -<br>[AFAM_MOUSE]                                                                                    | 16.78 | 3 | 9  | 9  | 18  | 3.142 | 1.544 | 0.291 | 0.731 | 46.29  | 16.78 | 14 | 18  | 608  | 69.3  | 5.78  |
| Q497V6-2 | Isoform 2 of Bromo<br>adjacent homology domain<br>containing 1 protein<br>OS=Mus musculus<br>GN=Bahd1 -<br>[BAHD1_MOUSE]                        | 2.08  | 2 | 1  | 1  | 1   | 2.846 | 2.373 | 0.592 | 0.731 | 1.89   | 2.08  | 1  | 1   | 769  | 83.5  | 9.01  |
| Q8CCT4   | Transcription elongation<br>factor A protein-like 5<br>OS=Mus musculus<br>GN=Tcea5 PE=1 SV=1 -<br>[TCALS_MOUSE]                                 | 41.50 | 5 | 3  | 8  | 79  | 1.152 | 0.565 | 1.167 | 0.731 | 204.95 | 41.50 | 13 | 79  | 200  | 22.0  | 6.20  |
| P35951   | Low-density lipoprotein<br>receptor OS=Mus<br>musculus GN=Ldlr PE=1<br>SV=2 - [LDLR_MOUSE]                                                      | 11.25 | 1 | 8  | 8  | 19  | 1.263 | 0.536 | 0.641 | 0.732 | 54.08  | 11.25 | 14 | 19  | 862  | 94.9  | 5.02  |
| Q9ZZX1-2 | Isoform 2 of<br>Heterogeneous nuclear<br>ribonucleoprotein F<br>OS=Mus musculus<br>GN=Hnrnpf -<br>[HNRNPF_MOUSE]                                | 39.24 | 5 | 10 | 12 | 140 | 1.386 | 0.885 | 0.805 | 0.732 | 466.95 | 39.24 | 21 | 140 | 395  | 43.7  | 5.48  |
| Q5SUH7   | Claithrin interactor 1<br>OS=Mus musculus<br>GN=Clint1 PE=2 SV=1 -<br>[Q5SUH7_MOUSE]                                                            | 26.32 | 3 | 1  | 15 | 43  | 1.314 | 1.042 | 1.156 | 0.732 | 124.15 | 26.32 | 27 | 43  | 623  | 67.7  | 6.42  |
| Q8BGZ2-2 | Isoform 2 of Protein<br>FAM168A OS=Mus<br>musculus GN=Fam168a -<br>[F168A_MOUSE]                                                                | 7.66  | 2 | 2  | 2  | 11  | 1.044 | 0.651 | 0.882 | 0.732 | 28.77  | 7.66  | 4  | 11  | 235  | 25.0  | 9.16  |
| P56677   | Suppressor of<br>tumorigenicity 14 protein<br>homolog OS=Mus<br>musculus GN=St14 PE=1<br>SV=2 - [ST14_MOUSE]                                    | 1.05  | 1 | 1  | 1  | 1   | 4.471 | 2.687 | 1.031 | 0.733 | 2.19   | 1.05  | 1  | 1   | 855  | 94.6  | 6.81  |
| Q9DBP5   | UMP-CMP kinase OS=Mus<br>musculus GN=Cmpk1<br>PE=1 SV=1<br>[KCY_MOUSE]                                                                          | 62.24 | 1 | 11 | 12 | 129 | 1.378 | 0.736 | 0.923 | 0.733 | 326.62 | 62.24 | 21 | 129 | 196  | 22.2  | 5.83  |

|          |                                                                                                              |       |   |    |    |     |       |       |       |       |        |       |    |     |      |       |       |
|----------|--------------------------------------------------------------------------------------------------------------|-------|---|----|----|-----|-------|-------|-------|-------|--------|-------|----|-----|------|-------|-------|
| H3BJC4   | Potassium voltage-gated channel subfamily H member 2 OS=Mus musculus GN=Erg PE=2 SV=1 - [H3BJC4_MOUSE]       | 3.03  | 6 | 1  | 1  | 1   | 1.246 | 0.795 | 0.779 | 0.733 | 2.64   | 3.03  | 1  | 1   | 363  | 41.4  | 7.49  |
| Q8CI95   | Oxysterol-binding protein-related protein 11 OS=Mus musculus GN=Osbp11 PE=1 SV=2 - [OSB11_MOUSE]             | 24.37 | 2 | 8  | 10 | 31  | 1.076 | 1.031 | 0.935 | 0.733 | 87.68  | 24.37 | 18 | 31  | 751  | 83.6  | 7.01  |
| O08583   | THO complex subunit 4 OS=Mus musculus GN=Alyref PE=1 SV=3 - [THOC4_MOUSE]                                    | 40.78 | 8 | 5  | 8  | 68  | 1.289 | 0.436 | 1.151 | 0.734 | 200.11 | 40.78 | 14 | 68  | 255  | 26.9  | 11.15 |
| A6H6E2   | Multimerin-2 OS=Mus musculus GN=Mmm2 PE=2 SV=1 - [MRRN2_MOUSE]                                               | 4.24  | 1 | 3  | 4  | 11  | 1.269 | 1.161 | 0.624 | 0.734 | 17.72  | 4.24  | 7  | 11  | 943  | 105.1 | 5.57  |
| O08644   | Ephrin type-B receptor 6 OS=Mus musculus GN=Ephb6 PE=2 SV=4 - [EPHB6_MOUSE]                                  | 7.59  | 2 | 5  | 5  | 14  | 0.699 | 0.950 | 0.989 | 0.734 | 35.72  | 7.59  | 8  | 14  | 1014 | 110.0 | 6.83  |
| Q8BUN5   | Mothers against decapentaplegic homolog 3 OS=Mus musculus GN=Smad3 PE=1 SV=2 - [SMAD3_MOUSE]                 | 12.24 | 4 | 2  | 6  | 13  | 0.507 | 2.303 | 1.287 | 0.734 | 36.64  | 12.24 | 9  | 13  | 425  | 48.0  | 7.15  |
| Q8BH24   | Transmembrane 9 superfamily member 4 OS=Mus musculus GN=Tm9sf4 PE=2 SV=1 - [TM9S4_MOUSE]                     | 15.86 | 1 | 9  | 9  | 27  | 0.699 | 0.713 | 0.600 | 0.734 | 74.55  | 15.86 | 17 | 27  | 643  | 74.6  | 7.23  |
| Q6PGG6   | Guanine nucleotide-binding protein-like 3-like protein OS=Mus musculus GN=Gnl3l PE=1 SV=1 - [GNL3L_MOUSE]    | 7.45  | 1 | 4  | 4  | 6   | 1.211 | 0.714 | 0.751 | 0.734 | 12.69  | 7.45  | 4  | 6   | 577  | 65.2  | 8.60  |
| Q9D2R8   | 28S ribosomal protein S33, mitochondrial OS=Mus musculus GN=Mips33 PE=2 SV=1 - [RT33_MOUSE]                  | 11.32 | 1 | 1  | 1  | 2   | 0.800 | 0.594 | 0.784 | 0.735 | 6.38   | 11.32 | 2  | 2   | 106  | 12.5  | 10.26 |
| Q63850   | Nuclear pore glycoprotein p62 OS=Mus musculus GN=Nup62 PE=1 SV=2 - [NUP62_MOUSE]                             | 10.46 | 1 | 3  | 5  | 12  | 1.553 | 1.145 | 1.177 | 0.735 | 28.91  | 10.46 | 8  | 12  | 526  | 53.2  | 5.31  |
| Q3TLH4   | Protein PRRC2C OS=Mus musculus GN=Prrc2c PE=1 SV=3 - [PRC2C_MOUSE]                                           | 19.96 | 2 | 45 | 49 | 190 | 1.333 | 0.761 | 1.055 | 0.735 | 484.90 | 19.96 | 81 | 190 | 2846 | 310.7 | 9.10  |
| O88271   | Craniofacial development protein 1 OS=Mus musculus GN=Cfdp1 PE=1 SV=1 - [CFDP1_MOUSE]                        | 29.15 | 1 | 7  | 7  | 23  | 1.424 | 0.667 | 1.011 | 0.735 | 74.88  | 29.15 | 12 | 23  | 295  | 32.9  | 4.86  |
| Q921L3   | Transmembrane and coiled coil domain-containing protein 1 OS=Mus musculus GN=Tmco1 PE=2 SV=1 - [TMCO1_MOUSE] | 12.77 | 1 | 2  | 2  | 6   | 1.049 | 0.676 | 0.810 | 0.735 | 19.02  | 12.77 | 3  | 6   | 188  | 21.2  | 9.74  |
| Q9CZ49   | Kelch-like protein 35 OS=Mus musculus GN=Kih35 PE=2 SV=2 - [KLH35_MOUSE]                                     | 2.79  | 1 | 1  | 1  | 1   | 1.208 | 0.884 | 0.472 | 0.735 | 2.50   | 2.79  | 1  | 1   | 574  | 62.3  | 7.42  |
| Q62167   | ATP-dependent RNA helicase DDX3X OS=Mus musculus GN=Ddx3x PE=1 SV=3 - [DDX3X_MOUSE]                          | 56.19 | 2 | 8  | 35 | 181 | 0.704 | 0.552 | 0.773 | 0.735 | 539.92 | 56.19 | 59 | 181 | 662  | 73.1  | 7.18  |
| Q9Z000   | Epididymal secretory protein E1 OS=Mus musculus GN=Npc2 PE=2 SV=1 - [NPC2_MOUSE]                             | 51.68 | 1 | 9  | 9  | 26  | 2.192 | 0.567 | 0.765 | 0.735 | 71.57  | 51.68 | 14 | 26  | 149  | 16.4  | 7.68  |
| A2A9C8   | Mediator of RNA polymerase II transcription subunit 8 OS=Mus musculus GN=Med8 PE=2 SV=1 - [A2A9CB_MOUSE]     | 8.53  | 4 | 1  | 1  | 2   | 2.413 | 1.285 | 1.012 | 0.736 | 0.00   | 8.53  | 2  | 2   | 129  | 14.2  | 9.09  |
| Q02819   | Nucleobindin-1 OS=Mus musculus GN=Nucb1 PE=1 SV=2 - [NUCB1_MOUSE]                                            | 51.42 | 4 | 20 | 21 | 175 | 2.460 | 0.923 | 0.891 | 0.736 | 570.56 | 51.42 | 39 | 175 | 459  | 53.4  | 5.07  |
| Q9D8L5   | Coiled-coil domain-containing protein 91 OS=Mus musculus GN=Ccd91 PE=2 SV=2 - [CCD91_MOUSE]                  | 30.32 | 2 | 17 | 17 | 52  | 1.487 | 1.016 | 0.994 | 0.736 | 136.66 | 30.32 | 29 | 52  | 442  | 50.0  | 5.07  |
| E9Q6B2   | Coiled-coil domain-containing protein 85C OS=Mus musculus GN=Ccd85c PE=2 SV=1 - [CC85C_MOUSE]                | 27.14 | 1 | 10 | 10 | 26  | 1.562 | 0.910 | 1.381 | 0.737 | 99.48  | 27.14 | 16 | 26  | 420  | 45.3  | 6.96  |
| Q78HU3   | Multivesicular body subunit 12A OS=Mus musculus GN=Mvb12a PE=1 SV=1 - [MB12A_MOUSE]                          | 21.03 | 1 | 3  | 3  | 5   | 1.043 | 1.065 | 1.028 | 0.737 | 8.05   | 21.03 | 3  | 5   | 271  | 28.7  | 9.11  |
| Q08EC4-3 | Isoform 3 of Cas scaffolding protein family member 4 OS=Mus musculus GN=Cass4 - [CASS4_MOUSE]                | 2.19  | 3 | 1  | 1  | 1   | 0.687 | 0.614 | 0.687 | 0.737 | 2.87   | 2.19  | 1  | 1   | 685  | 75.5  | 6.71  |
| Q9D1J3   | SAP domain-containing ribonucleoprotein OS=Mus musculus GN=Sarp PE=1 SV=3 - [SARNP_MOUSE]                    | 40.95 | 1 | 8  | 8  | 30  | 0.822 | 0.545 | 1.039 | 0.737 | 85.58  | 40.95 | 14 | 30  | 210  | 23.5  | 6.65  |
| Q8BLN5   | Lanosterol synthase OS=Mus musculus GN=Lss PE=2 SV=2 - [ERG7_MOUSE]                                          | 20.87 | 1 | 13 | 13 | 27  | 0.926 | 0.334 | 0.591 | 0.737 | 77.24  | 20.87 | 21 | 27  | 733  | 83.1  | 6.40  |

|          |                                                                                                                              |       |   |    |    |     |       |       |       |       |        |       |    |     |      |       |       |
|----------|------------------------------------------------------------------------------------------------------------------------------|-------|---|----|----|-----|-------|-------|-------|-------|--------|-------|----|-----|------|-------|-------|
| Q80X32   | UPF0461 protein C5orf24 homolog OS=Mus musculus PE=1 SV=1 - [CE024_MOUSE]                                                    | 19.15 | 1 | 3  | 3  | 7   | 0.711 | 0.588 | 0.944 | 0.737 | 7.91   | 19.15 | 3  | 7   | 188  | 20.1  | 9.92  |
| E9Q6I3   | Protein Shroom3 OS=Mus musculus GN=Shroom3 PE=2 SV=1 - [E9Q6I3_MOUSE]                                                        | 4.49  | 6 | 3  | 6  | 20  | 1.423 | 1.030 | 1.032 | 0.737 | 49.36  | 4.49  | 8  | 20  | 1849 | 199.8 | 7.49  |
| Q99PI8   | Reticulon-4 receptor OS=Mus musculus GN=Rtn4r PE=2 SV=1 - [RTN4R_MOUSE]                                                      | 23.04 | 1 | 7  | 7  | 28  | 0.532 | 1.561 | 0.922 | 0.738 | 68.34  | 23.04 | 13 | 28  | 473  | 51.0  | 8.69  |
| Q80XP8   | Protein FAM76B OS=Mus musculus GN=Fam76b PE=2 SV=1 - [FA76B_MOUSE]                                                           | 16.22 | 3 | 4  | 5  | 8   | 1.678 | 0.757 | 0.869 | 0.738 | 15.02  | 16.22 | 7  | 8   | 339  | 38.5  | 9.29  |
| A2A8T9   | Uncharacterized protein OS=Mus musculus GN=Efcab14 PE=2 SV=1 - [A2A8T9_MOUSE]                                                | 9.29  | 4 | 3  | 3  | 4   | 1.219 | 0.699 | 0.723 | 0.738 | 11.34  | 9.29  | 4  | 4   | 420  | 46.5  | 6.47  |
| Q80U04-2 | Isoform 2 of E3 ubiquitin-protein ligase Praja-2 OS=Mus musculus GN=Pja2 - [PJA2_MOUSE]                                      | 22.33 | 2 | 8  | 8  | 40  | 1.685 | 0.892 | 1.177 | 0.738 | 115.16 | 22.33 | 14 | 40  | 645  | 71.2  | 4.53  |
| Q0VQU4   | MCG18019 OS=Mus musculus GN=Vgf PE=2 SV=1 - [Q0VQU4_MOUSE]                                                                   | 41.49 | 1 | 19 | 19 | 200 | 1.452 | 0.736 | 0.878 | 0.738 | 568.07 | 41.49 | 35 | 200 | 617  | 68.2  | 4.70  |
| E9PV69   | CDK2-associated and cullin domain-containing protein 1 OS=Mus musculus GN=Cacul1 PE=2 SV=1 - [E9PV69_MOUSE]                  | 14.70 | 3 | 3  | 3  | 4   | 0.942 | 0.861 | 0.843 | 0.738 | 9.20   | 14.70 | 4  | 4   | 347  | 38.8  | 5.25  |
| B7ZDD9   | Carnitine O-acetyltransferase OS=Mus musculus GN=Crat PE=2 SV=1 - [B7ZDD9_MOUSE]                                             | 10.34 | 1 | 1  | 1  | 2   | 1.881 | 2.263 | 0.923 | 0.738 | 3.74   | 10.34 | 2  | 2   | 58   | 6.2   | 5.78  |
| Q8C4I7   | Transducin beta-like protein 3 OS=Mus musculus GN=Tbl3 PE=2 SV=1 - [TBL3_MOUSE]                                              | 8.24  | 2 | 4  | 6  | 8   | 0.923 | 0.957 | 0.921 | 0.738 | 21.74  | 8.24  | 8  | 8   | 801  | 88.2  | 6.81  |
| Q3URQ0   | Testis-expressed sequence 10 protein OS=Mus musculus GN=Tex10 PE=1 SV=1 - [TEX10_MOUSE]                                      | 8.73  | 2 | 5  | 5  | 10  | 0.747 | 0.817 | 0.640 | 0.738 | 18.19  | 8.73  | 8  | 10  | 928  | 105.1 | 9.16  |
| D3Z1R2   | Methylenetetrahydrofolate synthase domain-containing protein (Fragment) OS=Mus musculus GN=Mthfsd PE=2 SV=1 - [D3Z1R2_MOUSE] | 7.17  | 3 | 2  | 2  | 3   | 1.152 | 1.049 | 1.211 | 0.738 | 5.94   | 7.17  | 3  | 3   | 279  | 29.9  | 8.65  |
| Q9EQC8   | Papillary renal cell carcinoma (Translocation-associated) OS=Mus musculus GN=Prcc PE=2 SV=1 - [Q9EQC8_MOUSE]                 | 15.68 | 1 | 6  | 6  | 14  | 0.955 | 0.857 | 1.106 | 0.739 | 40.34  | 15.68 | 9  | 14  | 491  | 52.3  | 4.94  |
| Q99JF8   | PC4 and SFRS1-interacting protein OS=Mus musculus GN=Psp1 PE=1 SV=1 - [PSP1_MOUSE]                                           | 39.02 | 4 | 18 | 20 | 90  | 0.616 | 0.611 | 1.009 | 0.739 | 237.82 | 39.02 | 32 | 90  | 528  | 59.7  | 9.13  |
| Q9JII5-2 | Isoform 2 of DAZ-associated protein 1 OS=Mus musculus GN=Dazap1 -                                                            | 21.48 | 4 | 7  | 7  | 39  | 1.984 | 0.754 | 0.953 | 0.739 | 113.30 | 21.48 | 11 | 39  | 405  | 43.1  | 8.56  |
| P61219   | DNA-directed RNA polymerases I, II, and III subunit RPABC2 OS=Mus musculus GN=Polr2f PE=2 SV=1 - [RPAB2_MOUSE]               | 11.81 | 1 | 2  | 2  | 7   | 1.259 | 0.970 | 0.881 | 0.739 | 17.54  | 11.81 | 4  | 7   | 127  | 14.5  | 4.22  |
| P62274   | 40S ribosomal protein S29 OS=Mus musculus GN=Rps29 PE=2 SV=2 - [RS29_MOUSE]                                                  | 25.00 | 2 | 3  | 3  | 5   | 0.485 | 0.506 | 0.730 | 0.739 | 9.53   | 25.00 | 4  | 5   | 56   | 6.7   | 10.13 |
| Q3UXU7   | Vang-like protein 1 OS=Mus musculus GN=Vangl1 PE=2 SV=1 - [Q3UXU7_MOUSE]                                                     | 10.29 | 5 | 3  | 3  | 6   | 0.695 | 0.558 | 0.597 | 0.739 | 28.25  | 10.29 | 4  | 6   | 476  | 54.3  | 8.57  |
| D3Z3E6   | Transmembrane protein 56 (Fragment) OS=Mus musculus GN=Tmem56 PE=2 SV=1 - [D3Z3E6_MOUSE]                                     | 8.70  | 3 | 1  | 1  | 2   | 0.788 | 0.781 | 0.780 | 0.739 | 7.01   | 8.70  | 2  | 2   | 138  | 15.3  | 6.51  |
| Q9CQ20   | Mid1-interacting protein 1 OS=Mus musculus GN=Mid1ip1 PE=1 SV=1 - [M1IP1_MOUSE]                                              | 35.71 | 2 | 5  | 5  | 19  | 1.640 | 0.621 | 0.613 | 0.739 | 53.58  | 35.71 | 8  | 19  | 182  | 20.3  | 5.50  |
| Q4VBEB   | WD repeat-containing protein 18 OS=Mus musculus GN=Wdr18 PE=1 SV=1 -                                                         | 15.31 | 1 | 6  | 6  | 11  | 0.938 | 0.992 | 0.770 | 0.739 | 33.09  | 15.31 | 11 | 11  | 431  | 47.2  | 6.89  |
| Q9Z204   | Heterogeneous nuclear ribonucleoproteins C1/C2 OS=Mus musculus GN=Hnrnpc PE=1 SV=1 - [HNRPC_MOUSE]                           | 42.49 | 1 | 1  | 13 | 61  | 0.986 | 0.903 | 0.980 | 0.739 | 161.46 | 42.49 | 22 | 61  | 313  | 34.4  | 5.05  |
| Q9R0Q1   | Synaptotagmin-like protein 4 OS=Mus musculus GN=Sytd4 PE=1 SV=1 - [SYTL4_MOUSE]                                              | 11.14 | 4 | 5  | 7  | 17  | 0.880 | 0.931 | 0.493 | 0.739 | 34.37  | 11.14 | 12 | 17  | 673  | 76.0  | 8.84  |
| Q7TPB0   | Lipid phosphate phosphatase-related protein type 3 OS=Mus musculus GN=Lppr3 PE=2 SV=1 - [LPPR3_MOUSE]                        | 33.24 | 7 | 18 | 18 | 76  | 0.708 | 0.692 | 0.711 | 0.740 | 234.31 | 33.24 | 28 | 76  | 716  | 76.6  | 6.01  |
| F8VQ29   | Protein Iqgap3 OS=Mus musculus GN=Iqgap3 PE=2 SV=1 - [F8VQ29_MOUSE]                                                          | 1.41  | 1 | 1  | 2  | 2   | 1.416 | 2.676 | 0.997 | 0.740 | 4.50   | 1.41  | 2  | 2   | 1632 | 185.2 | 7.52  |

|          |                                                                                                                                      |       |   |    |    |     |       |       |       |       |         |       |    |     |      |       |      |
|----------|--------------------------------------------------------------------------------------------------------------------------------------|-------|---|----|----|-----|-------|-------|-------|-------|---------|-------|----|-----|------|-------|------|
| Q91W98   | Solute carrier family 15 member 4 OS=Mus musculus GN=Slc15a4 PE=1 SV=1 -                                                             | 2.26  | 1 | 1  | 1  | 2   | 0.828 | 0.818 | 0.785 | 0.740 | 8.98    | 2.26  | 2  | 2   | 574  | 62.2  | 9.16 |
| Q9J144   | DNA methyltransferase 1-associated protein 1 OS=Mus musculus GN=Dmap1 PE=1 SV=1 - [DMAP1_MOUSE]                                      | 11.97 | 2 | 4  | 4  | 6   | 0.436 | 0.666 | 0.787 | 0.740 | 12.18   | 11.97 | 6  | 6   | 468  | 53.1  | 9.50 |
| Q543V3   | Insulin receptor substrate 1 OS=Mus musculus GN=Irs1 PE=2 SV=1 - [Q543V3_MOUSE]                                                      | 6.74  | 2 | 6  | 6  | 24  | 0.884 | 0.676 | 0.904 | 0.740 | 50.11   | 6.74  | 10 | 24  | 1231 | 130.5 | 8.78 |
| Q62419   | Endophilin-A2 OS=Mus musculus GN=Sh3gl1 PE=1 SV=1 - [SH3G1_MOUSE]                                                                    | 62.77 | 1 | 16 | 21 | 123 | 0.957 | 0.963 | 1.265 | 0.740 | 344.47  | 62.77 | 38 | 123 | 368  | 41.5  | 5.72 |
| F6V0H0   | Protein Pagr1b (Fragment) OS=Mus musculus GN=Pagr1b PE=4 SV=1 - [F6V0H0_MOUSE]                                                       | 32.41 | 2 | 3  | 3  | 6   | 1.661 | 0.877 | 1.047 | 0.741 | 17.63   | 32.41 | 5  | 6   | 108  | 12.5  | 5.66 |
| Q9CPZ8   | COX assembly mitochondrial protein homolog OS=Mus musculus GN=Cmc1 PE=3 SV=1 - [COXM1_MOUSE]                                         | 40.57 | 1 | 4  | 4  | 19  | 1.266 | 0.615 | 0.980 | 0.741 | 50.33   | 40.57 | 6  | 19  | 106  | 12.5  | 8.24 |
| Q9CQI7   | U2 small nuclear ribonucleoprotein B* OS=Mus musculus GN=Snrpb2 PE=2 SV=1 -                                                          | 30.22 | 2 | 5  | 7  | 20  | 1.411 | 0.927 | 1.074 | 0.741 | 52.27   | 30.22 | 10 | 20  | 225  | 25.3  | 9.72 |
| Q60709   | Amyloid-like protein 2 OS=Mus musculus GN=Aplp2 PE=2 SV=1 - [Q60709_MOUSE]                                                           | 33.56 | 2 | 3  | 22 | 72  | 0.630 | 0.844 | 1.120 | 0.741 | 211.90  | 33.56 | 39 | 72  | 751  | 85.2  | 4.73 |
| O70551   | SRK protein kinase 1 OS=Mus musculus GN=Srkp1 PE=1 SV=2 - [SRPK1_MOUSE]                                                              | 10.96 | 3 | 6  | 9  | 14  | 3.149 | 0.927 | 0.865 | 0.741 | 31.68   | 10.96 | 12 | 14  | 648  | 73.0  | 6.19 |
| Q6PGF2   | MORN repeat-containing protein 4 OS=Mus musculus GN=Morn4 PE=2 SV=1 - [MORV4_MOUSE]                                                  | 28.08 | 1 | 4  | 4  | 6   | 1.631 | 1.235 | 1.113 | 0.741 | 16.33   | 28.08 | 6  | 6   | 146  | 16.2  | 8.15 |
| P20029   | 78 kDa glucose-regulated protein OS=Mus musculus GN=Hspa5 PE=1 SV=3 - [GRP78_MOUSE]                                                  | 58.17 | 1 | 42 | 45 | 688 | 1.199 | 0.880 | 0.898 | 0.741 | 1937.18 | 58.17 | 83 | 688 | 655  | 72.4  | 5.16 |
| Q4JK59-3 | Isoform 3 of Methylcytosine dioxygenase TET2 OS=Mus musculus GN=Tet2 - [TET2_MOUSE]                                                  | 2.07  | 3 | 1  | 1  | 3   | 2.632 | 1.267 | 1.106 | 0.742 | 7.37    | 2.07  | 1  | 3   | 580  | 64.5  | 8.84 |
| D3Z6M7   | MCG8002 OS=Mus musculus GN=Sult2a4 PE=4 SV=2 - [D3Z6M7_MOUSE]                                                                        | 3.17  | 3 | 1  | 1  | 1   | 2.080 | 1.903 | 0.971 | 0.742 | 0.00    | 3.17  | 1  | 1   | 284  | 33.2  | 8.18 |
| B0R106   | Proline-rich protein 5-like (Fragment) OS=Mus musculus GN=Prr5l PE=2 SV=1 - [B0R106_MOUSE]                                           | 6.25  | 2 | 1  | 1  | 2   | 2.521 | 1.395 | 0.854 | 0.742 | 5.12    | 6.25  | 1  | 2   | 128  | 14.4  | 9.54 |
| Q5SKY1   | Cytospin-B OS=Mus musculus GN=Specc1 PE=1 SV=2 - [CYTSB_MOUSE]                                                                       | 39.46 | 2 | 7  | 39 | 147 | 0.787 | 0.568 | 1.354 | 0.742 | 405.66  | 39.46 | 69 | 147 | 1067 | 118.0 | 6.64 |
| P49182   | Heparin cofactor 2 OS=Mus musculus GN=Serpind1 PE=1 SV=1 - [HEP2_MOUSE]                                                              | 4.18  | 1 | 2  | 2  | 5   | 2.222 | 1.933 | 0.533 | 0.742 | 16.77   | 4.18  | 3  | 5   | 478  | 54.5  | 7.34 |
| Q9DC33   | High mobility group protein 20A OS=Mus musculus GN=Hmg20a PE=2 SV=1 -                                                                | 26.88 | 3 | 8  | 8  | 25  | 0.894 | 0.730 | 0.996 | 0.742 | 76.96   | 26.88 | 13 | 25  | 346  | 39.9  | 6.40 |
| Q9Z307   | Inward rectifier potassium channel 16 OS=Mus musculus GN=Kcnj16 PE=2 SV=2 -                                                          | 15.75 | 3 | 7  | 7  | 20  | 0.880 | 0.544 | 0.593 | 0.743 | 47.98   | 15.75 | 13 | 20  | 419  | 48.0  | 7.83 |
| Q60715   | Prolyl 4-hydroxylase subunit alpha-1 OS=Mus musculus GN=P4ha1 PE=2 SV=2 - [P4HA1_MOUSE]                                              | 12.73 | 3 | 6  | 6  | 10  | 0.918 | 1.063 | 0.675 | 0.743 | 31.45   | 12.73 | 8  | 10  | 534  | 60.9  | 5.90 |
| Q9R099   | Transducin beta-like protein 2 OS=Mus musculus GN=Tbl2 PE=2 SV=2 - [TBL2_MOUSE]                                                      | 18.10 | 3 | 7  | 7  | 9   | 0.759 | 0.781 | 0.753 | 0.743 | 24.51   | 18.10 | 8  | 9   | 442  | 49.6  | 9.04 |
| A2AHX8   | Bcl-2-like protein 1 (Fragment) OS=Mus musculus GN=Bcl2l1 PE=2 SV=1 - [A2AHX8_MOUSE]                                                 | 34.38 | 8 | 3  | 3  | 9   | 0.957 | 1.018 | 0.653 | 0.743 | 21.54   | 34.38 | 5  | 9   | 96   | 10.5  | 4.56 |
| Q9Z0H3   | SWI/SNF-related matrix-associated actin-dependent regulator of chromatin subfamily B member 1 OS=Mus musculus GN=Smardc1 PE=1 SV=1 - | 11.69 | 4 | 5  | 5  | 15  | 1.109 | 0.736 | 0.810 | 0.743 | 44.89   | 11.69 | 9  | 15  | 385  | 44.1  | 6.23 |
| Q8BU40   | NACHT, LRR and PYD domains-containing protein 4A OS=Mus musculus GN=Nlrp4a PE=2 SV=1 -                                               | 4.48  | 1 | 2  | 3  | 4   | 1.028 | 0.925 | 1.011 | 0.744 | 13.38   | 4.48  | 3  | 4   | 982  | 112.5 | 6.27 |
| O09159   | MANNA MANNA1 Lysoosomal alpha-mannosidase OS=Mus musculus GN=Man2b1 PE=2 SV=4 -                                                      | 12.64 | 1 | 10 | 10 | 25  | 1.797 | 0.761 | 0.676 | 0.744 | 73.96   | 12.64 | 17 | 25  | 1013 | 114.6 | 8.13 |
| Q3ZAQ4   | Autophagy 9-like 1 protein OS=Mus musculus GN=Atg9a PE=2 SV=1 - [Q3ZAQ4_MOUSE]                                                       | 12.99 | 2 | 9  | 9  | 28  | 1.080 | 0.937 | 0.864 | 0.744 | 74.06   | 12.99 | 17 | 28  | 839  | 94.4  | 6.64 |
| Q9CXX9   | CLIE domain-containing protein 2 OS=Mus musculus GN=Cuedc2 PE=2 SV=1 -                                                               | 21.83 | 2 | 4  | 5  | 24  | 1.284 | 0.763 | 1.396 | 0.744 | 73.81   | 21.83 | 9  | 24  | 284  | 31.8  | 4.98 |

|          |                                                                                                                    |       |    |    |    |     |       |       |       |       |         |       |    |     |      |       |      |
|----------|--------------------------------------------------------------------------------------------------------------------|-------|----|----|----|-----|-------|-------|-------|-------|---------|-------|----|-----|------|-------|------|
| Q9WV03   | Protein FAM50A OS=Mus musculus GN=Fam50a PE=2 SV=1 - [FA50A_MOUSE]                                                 | 7.37  | 1  | 2  | 2  | 6   | 0.425 | 0.529 | 0.852 | 0.744 | 13.08   | 7.37  | 4  | 6   | 339  | 40.2  | 6.83 |
| O35459   | Delta(3,5)-Delta(2,4)-dienoyl-CoA isomerase, mitochondrial OS=Mus musculus GN=Ech1 PE=2 SV=1 - [ECH1_MOUSE]        | 48.32 | 2  | 14 | 14 | 82  | 2.166 | 1.197 | 0.738 | 0.744 | 232.35  | 48.32 | 25 | 82  | 327  | 36.1  | 7.71 |
| A2AEY2   | Four and a half LIM domains 1, isoform CRA_c OS=Mus musculus GN=Fhl1 PE=4 SV=1 - [A2AEY2_MOUSE]                    | 35.29 | 6  | 1  | 11 | 51  | 1.463 | 0.866 | 0.824 | 0.745 | 121.63  | 35.29 | 18 | 51  | 323  | 36.2  | 9.01 |
| Q99LD8   | N(G),N(G)-dimethylarginine dimethylaminohydrolase 2 OS=Mus musculus GN=DDah2 PE=1 SV=1 - [DDAH2_MOUSE]             | 64.91 | 3  | 12 | 13 | 81  | 1.624 | 0.819 | 0.647 | 0.745 | 230.87  | 64.91 | 26 | 81  | 285  | 29.6  | 6.01 |
| Q9DBX1   | Regulator of cell cycle RGCC OS=Mus musculus GN=Rgcc PE=1 SV=1 - [RGCC_MOUSE]                                      | 21.90 | 1  | 2  | 2  | 10  | 2.511 | 1.609 | 1.364 | 0.745 | 29.44   | 21.90 | 4  | 10  | 137  | 14.7  | 4.84 |
| Q923D4   | Splicing factor 3B subunit 5 OS=Mus musculus GN=SF3b5 PE=2 SV=1 - [SF3B5_MOUSE]                                    | 62.79 | 1  | 5  | 5  | 14  | 1.094 | 0.903 | 0.786 | 0.745 | 42.25   | 62.79 | 9  | 14  | 86   | 10.1  | 6.35 |
| Q80X81   | Acetyl-Coenzyme A acetyltransferase 3 OS=Mus musculus GN=Acat3 PE=2 SV=1 - [Q80X81_MOUSE]                          | 53.15 | 2  | 3  | 17 | 199 | 2.543 | 0.705 | 0.597 | 0.746 | 619.36  | 53.15 | 28 | 199 | 397  | 41.4  | 7.94 |
| Q9QXT0   | Protein canopy homolog 2 OS=Mus musculus GN=Cnpy2 PE=2 SV=1 - [CNPY2_MOUSE]                                        | 61.54 | 1  | 11 | 11 | 50  | 1.923 | 0.992 | 0.956 | 0.746 | 138.35  | 61.54 | 22 | 50  | 182  | 20.8  | 5.07 |
| P57787   | Monocarboxylate transporter 4 OS=Mus musculus GN=Slc16a3 PE=1 SV=1 - [SLC16A3_MOUSE]                               | 1.49  | 1  | 1  | 1  | 4   | 0.479 | 0.436 | 0.974 | 0.746 | 5.79    | 1.49  | 2  | 4   | 470  | 50.3  | 7.96 |
| F8WIC0   | Adenylate kinase 7 OS=Mus musculus GN=Ak7 PE=2 SV=1 - [F8WIC0_MOUSE]                                               | 2.21  | 1  | 1  | 1  | 1   | 2.202 | 1.000 | 0.681 | 0.746 | 0.00    | 2.21  | 1  | 1   | 723  | 82.5  | 4.88 |
| E9Q4A0   | cAMP-regulated phosphoprotein 21 OS=Mus musculus GN=Arpp21 PE=2 SV=2 - [ARPP21_MOUSE]                              | 12.65 | 17 | 7  | 7  | 23  | 0.932 | 0.957 | 1.374 | 0.746 | 68.23   | 12.65 | 11 | 23  | 601  | 65.2  | 6.87 |
| Q5FW52-2 | Isoform 2 of Muscular LMNA-interacting protein OS=Mus musculus GN=Mlip - [MLIP_MOUSE]                              | 30.84 | 2  | 5  | 5  | 12  | 1.713 | 2.086 | 2.884 | 0.746 | 44.89   | 30.84 | 7  | 12  | 227  | 25.0  | 6.81 |
| Q80Y50-5 | Isoform 5 of Calmodulin-binding transcription activator 2 OS=Mus musculus GN=Camta2 - [CMTA2_MOUSE]                | 7.09  | 2  | 1  | 4  | 4   | 1.887 | 1.335 | 1.402 | 0.746 | 4.02    | 7.09  | 4  | 4   | 1001 | 107.8 | 6.42 |
| B1AQG7   | Protein Zfp207 (Fragment) OS=Mus musculus GN=Zfp207 PE=2 SV=1 - [B1AQG7_MOUSE]                                     | 18.06 | 5  | 3  | 3  | 16  | 1.411 | 0.718 | 1.002 | 0.746 | 50.81   | 18.06 | 6  | 16  | 227  | 25.0  | 6.52 |
| O09105   | Neurogenic differentiation factor 4 OS=Mus musculus GN=Neurod4 PE=1 SV=1 - [NDF4_MOUSE]                            | 2.73  | 1  | 1  | 1  | 1   | 1.126 | 0.435 | 0.808 | 0.746 | 1.97    | 2.73  | 1  | 1   | 330  | 37.1  | 7.17 |
| Q3V341   | Protein kinase C zeta type OS=Mus musculus GN=Prkcζ PE=2 SV=1 - [Q3V341_MOUSE]                                     | 8.31  | 2  | 4  | 4  | 10  | 0.531 | 0.910 | 0.942 | 0.746 | 9.05    | 8.31  | 5  | 10  | 409  | 46.6  | 4.84 |
| Q05DT2   | Hmg20b protein OS=Mus musculus GN=Hmg20b PE=2 SV=1 - [Q05DT2_MOUSE]                                                | 11.16 | 4  | 2  | 2  | 2   | 3.008 | 0.898 | 0.827 | 0.747 | 5.73    | 11.16 | 2  | 2   | 215  | 24.7  | 6.15 |
| Q8R507   | Fukutin OS=Mus musculus GN=Fktn PE=2 SV=1 - [FKTN_MOUSE]                                                           | 1.95  | 1  | 1  | 1  | 4   | 0.717 | 0.753 | 0.704 | 0.747 | 10.12   | 1.95  | 2  | 4   | 461  | 53.5  | 8.51 |
| Q9Z1Q5   | Chloride intracellular channel protein 1 OS=Mus musculus GN=Clic1 PE=1 SV=3 - [CLIC1_MOUSE]                        | 49.79 | 2  | 10 | 11 | 27  | 0.624 | 1.538 | 0.727 | 0.747 | 80.91   | 49.79 | 18 | 27  | 241  | 27.0  | 5.17 |
| F6QKD2   | Probable ATP-dependent RNA helicase DDX47 (Fragment) OS=Mus musculus GN=Ddx47 PE=3 SV=1 - [F6QKD2_MOUSE]           | 8.33  | 2  | 2  | 2  | 4   | 3.367 | 1.322 | 0.719 | 0.747 | 8.71    | 8.33  | 3  | 4   | 360  | 40.0  | 8.85 |
| Q3TCT4-2 | Isoform 2 of Ectonucleoside triphosphate diphosphohydrolase 7 OS=Mus musculus GN=Entpd7 PE=2 SV=1 - [Q3TCT4_MOUSE] | 7.91  | 2  | 1  | 1  | 1   | 1.139 | 0.918 | 0.768 | 0.747 | 0.00    | 7.91  | 1  | 1   | 354  | 40.0  | 6.80 |
| P56212-2 | Isoform ARPP-16 of cAMP-regulated phosphoprotein 19 OS=Mus musculus GN=Arpp19 - [ARPP19_MOUSE]                     | 60.42 | 5  | 4  | 5  | 37  | 1.188 | 0.624 | 2.100 | 0.748 | 110.53  | 60.42 | 9  | 37  | 96   | 10.6  | 9.70 |
| B2LVG5   | Cleavage and polyadenylation specific factor 4 isoform 1 OS=Mus musculus GN=Cpsf4 PE=2 SV=1 - [B2LVG5_MOUSE]       | 16.05 | 7  | 3  | 3  | 7   | 0.947 | 0.900 | 0.842 | 0.748 | 23.49   | 16.05 | 5  | 7   | 243  | 27.4  | 8.22 |
| Q61548-3 | Isoform 3 of Clathrin coat assembly protein AP180 OS=Mus musculus GN=Snap91 - [SNAP91_MOUSE]                       | 36.64 | 6  | 1  | 29 | 438 | 0.717 | 1.181 | 1.027 | 0.748 | 1236.96 | 36.64 | 51 | 438 | 868  | 88.8  | 4.91 |

|          |                                                                                                                          |       |     |    |    |     |        |       |       |       |         |       |    |     |      |       |       |
|----------|--------------------------------------------------------------------------------------------------------------------------|-------|-----|----|----|-----|--------|-------|-------|-------|---------|-------|----|-----|------|-------|-------|
| Q9D281   | Protein Noxp20 OS=Mus musculus GN=Fam114a1 PE=2 SV=1 - [NXP20_MOUSE]                                                     | 11.25 | 1   | 5  | 5  | 8   | 1.484  | 1.392 | 0.692 | 0.748 | 23.81   | 11.25 | 8  | 8   | 569  | 61.0  | 4.56  |
| Q3THK3   | General transcription factor IIF subunit 1 OS=Mus musculus GN=Gtf2f1 PE=1 SV=2 - [T2FA_MOUSE]                            | 6.69  | 1   | 4  | 4  | 6   | 0.484  | 0.681 | 0.808 | 0.748 | 11.55   | 6.69  | 5  | 6   | 508  | 57.2  | 7.01  |
| P27773   | Protein disulfide-isomerase A3 OS=Mus musculus GN=Pdia3 PE=1 SV=2 - [PDIA3_MOUSE]                                        | 71.49 | 2   | 38 | 38 | 428 | 1.247  | 0.858 | 0.791 | 0.748 | 1175.77 | 71.49 | 69 | 428 | 505  | 56.6  | 6.21  |
| Q6ZPR1   | UPF0501 protein KIAA1430 OS=Mus musculus GN=Kiaa1430 PE=1 SV=2 -                                                         | 1.48  | 2   | 1  | 1  | 1   | 0.637  | 0.677 | 0.886 | 0.748 | 0.00    | 1.48  | 1  | 1   | 541  | 60.8  | 9.51  |
| P53702   | Cytochrome c-type heme lyase OS=Mus musculus GN=Hcxs PE=2 SV=2 - [CCHL_MOUSE]                                            | 31.99 | 1   | 5  | 7  | 41  | 0.769  | 0.925 | 0.752 | 0.748 | 98.41   | 31.99 | 13 | 41  | 272  | 31.0  | 7.12  |
| Q8BUB6   | Uronyl 2-sulfotransferase OS=Mus musculus GN=Ust PE=2 SV=3 - [UST_MOUSE]                                                 | 3.19  | 1   | 1  | 1  | 2   | 0.897  | 0.911 | 0.561 | 0.748 | 6.35    | 3.19  | 2  | 2   | 407  | 47.7  | 8.57  |
| E9PYK7   | Contactin-5 OS=Mus musculus GN=Cntr5 PE=4 SV=1 - [E9PYK7_MOUSE]                                                          | 6.49  | 2   | 4  | 5  | 10  | 1.025  | 1.308 | 0.861 | 0.749 | 26.56   | 6.49  | 8  | 10  | 893  | 98.3  | 6.68  |
| F8WHT3   | Protein PRRC2B OS=Mus musculus GN=Prrc2b PE=2 SV=1 - [F8WHT3_MOUSE]                                                      | 19.91 | 4   | 11 | 36 | 91  | 1.072  | 0.880 | 1.110 | 0.749 | 245.07  | 19.91 | 59 | 91  | 2230 | 243.0 | 8.47  |
| Q9DCC1   | RNA guanylyltransferase and 5'-phosphatase, isoform CRA_a OS=Mus musculus GN=Rngtt PE=2 SV=1 - [Q9DCC1_MOUSE]            | 9.47  | 2   | 4  | 4  | 6   | 1.209  | 0.760 | 0.833 | 0.749 | 21.51   | 9.47  | 6  | 6   | 581  | 66.8  | 8.22  |
| Q00724   | Retinol-binding protein 4 OS=Mus musculus GN=Rbp4 PE=2 SV=2 - [RET4_MOUSE]                                               | 8.96  | 2   | 1  | 1  | 3   | 5.787  | 2.541 | 0.473 | 0.749 | 4.95    | 8.96  | 2  | 3   | 201  | 23.2  | 5.99  |
| Q5BKQ4   | Inactive pancreatic lipase-related protein 1 OS=Mus musculus GN=Philpp1 PE=2 SV=2 - [LIPR1_MOUSE]                        | 3.59  | 1   | 1  | 1  | 1   | 52.288 | 5.390 | 3.385 | 0.749 | 2.06    | 3.59  | 1  | 1   | 473  | 52.7  | 6.34  |
| Q9ZZE1   | Methyl-CpG-binding domain protein 2 OS=Mus musculus GN=Mbd2 PE=2 SV=2 - [MBD2_MOUSE]                                     | 22.22 | 3   | 6  | 6  | 9   | 0.901  | 0.713 | 1.087 | 0.749 | 26.54   | 22.22 | 8  | 9   | 414  | 43.5  | 10.04 |
| Q99JF5   | Diphosphomevalonate decarboxylase OS=Mus musculus GN=Mvd PE=1 SV=2 - [MVD1_MOUSE]                                        | 32.17 | 1   | 7  | 7  | 13  | 2.247  | 0.558 | 0.724 | 0.750 | 37.67   | 32.17 | 10 | 13  | 401  | 44.0  | 6.30  |
| Q7TPW1   | Nexlin OS=Mus musculus GN=Nexn PE=1 SV=3 - [NEXN_MOUSE]                                                                  | 13.18 | 1   | 7  | 8  | 17  | 1.696  | 1.030 | 1.523 | 0.750 | 49.19   | 13.18 | 12 | 17  | 607  | 72.1  | 5.01  |
| P29319   | Ephrin type-A receptor 3 OS=Mus musculus GN=Epha3 PE=1 SV=1 - [EPHA3_MOUSE]                                              | 5.19  | 5   | 2  | 4  | 9   | 1.508  | 2.332 | 0.959 | 0.750 | 25.39   | 5.19  | 5  | 9   | 983  | 109.9 | 7.20  |
| Q3U957   | Derlin-2 OS=Mus musculus GN=Derl2 PE=2 SV=1 - [Q3U957_MOUSE]                                                             | 18.18 | 2   | 1  | 1  | 2   | 0.457  | 0.686 | 0.660 | 0.750 | 3.68    | 18.18 | 2  | 2   | 165  | 18.9  | 6.06  |
| Q8C3W1   | Uncharacterized protein C1orf198 homolog OS=Mus musculus PE=1 SV=1 - [CA198_MOUSE]                                       | 71.12 | 1   | 15 | 15 | 141 | 1.320  | 0.760 | 0.908 | 0.750 | 345.49  | 71.12 | 23 | 141 | 322  | 35.3  | 5.24  |
| Q8BIQ6   | MCG23335 OS=Mus musculus GN=Zfp947 PE=2 SV=1 - [Q8BIQ6_MOUSE]                                                            | 8.70  | 145 | 1  | 2  | 3   | 1.430  | 0.925 | 0.820 | 0.750 | 7.03    | 8.70  | 3  | 3   | 437  | 51.4  | 8.87  |
| Q9CYP7   | Sestrin-3 OS=Mus musculus GN=Sezn3 PE=2 SV=1 - [SESN3_MOUSE]                                                             | 2.85  | 1   | 1  | 1  | 3   | 1.941  | 2.087 | 0.810 | 0.750 | 6.25    | 2.85  | 2  | 3   | 492  | 57.0  | 6.25  |
| Q3U0V2   | Tumor necrosis factor receptor type 1-associated DEATH domain protein OS=Mus musculus GN=Tradd PE=1 SV=1 - [TRADD_MOUSE] | 6.77  | 1   | 1  | 2  | 3   | 15.653 | 2.026 | 1.655 | 0.750 | 6.03    | 6.77  | 3  | 3   | 310  | 34.6  | 5.20  |
| O54851   | Gap junction delta-2 protein OS=Mus musculus GN=Gj2 PE=2 SV=2 - [CXD2_MOUSE]                                             | 2.49  | 1   | 1  | 1  | 1   | 1.001  | 0.688 | 0.818 | 0.750 | 2.48    | 2.49  | 1  | 1   | 321  | 36.1  | 8.68  |
| O70230-3 | Isoform 3 of Zinc finger protein 143 OS=Mus musculus GN=Znf143 - [ZNF143_MOUSE]                                          | 5.41  | 3   | 2  | 2  | 4   | 1.662  | 1.065 | 0.844 | 0.750 | 10.34   | 5.41  | 4  | 4   | 610  | 66.0  | 6.32  |
| Q8BIF9   | Zinc finger protein 787 OS=Mus musculus GN=Znf787 PE=2 SV=3 - [ZNF787_MOUSE]                                             | 5.25  | 1   | 2  | 2  | 5   | 0.992  | 0.764 | 1.155 | 0.751 | 12.82   | 5.25  | 4  | 5   | 381  | 40.5  | 8.24  |
| F8W93    | Echinoderm microtubule-associated protein-like 4 OS=Mus musculus GN=Emil4 PE=2 SV=1 - [F8W93_MOUSE]                      | 29.55 | 5   | 21 | 23 | 76  | 0.981  | 0.763 | 0.844 | 0.751 | 192.42  | 29.55 | 40 | 76  | 988  | 109.9 | 6.49  |
| Q6ZQ29-2 | Isoform 2 of Serine/threonine-protein kinase TAO2 OS=Mus musculus GN=Taok2 - [TAOK2_MOUSE]                               | 15.55 | 2   | 3  | 16 | 55  | 0.847  | 0.656 | 0.988 | 0.751 | 171.60  | 15.55 | 26 | 55  | 1055 | 119.9 | 7.28  |

|          |                                                                                                            |       |    |    |    |     |       |       |       |       |         |       |    |     |      |       |       |
|----------|------------------------------------------------------------------------------------------------------------|-------|----|----|----|-----|-------|-------|-------|-------|---------|-------|----|-----|------|-------|-------|
| Q91267   | SLIT-ROBO Rho GTPase-activating protein 2<br>OS=Mus musculus<br>GN=Srgap2 PE=1 SV=2 - [SRGAP2_MOUSE]       | 40.06 | 1  | 30 | 33 | 124 | 0.757 | 0.809 | 0.932 | 0.751 | 371.14  | 40.06 | 58 | 124 | 1071 | 120.7 | 6.64  |
| Q8C131   | Hydroxycarboxylic acid receptor 1 OS=Mus musculus GN=Hcar1 PE=1 SV=1 - [HCAR1_MOUSE]                       | 3.50  | 2  | 1  | 1  | 1   | 1.397 | 1.562 | 1.581 | 0.751 | 2.90    | 3.50  | 1  | 1   | 343  | 38.9  | 8.98  |
| Q8BUY9   | Geranylgeranyl transferase type-1 subunit beta OS=Mus musculus GN=Pggt1b PE=2 SV=1 - [PGTB1_MOUSE]         | 19.89 | 1  | 6  | 6  | 6   | 1.706 | 0.820 | 0.696 | 0.752 | 19.77   | 19.89 | 6  | 6   | 377  | 42.3  | 6.83  |
| O35098   | Dihydropyrimidinase-related protein 4 OS=Mus musculus GN=Dpysl4 PE=1 SV=1 -                                | 76.22 | 3  | 25 | 34 | 428 | 0.857 | 0.703 | 0.743 | 0.752 | 1406.47 | 76.22 | 62 | 428 | 572  | 61.9  | 6.98  |
| Q9CQG9   | Transmembrane protein 100 OS=Mus musculus GN=Tmem100 PE=1 SV=1 - [TM100_MOUSE]                             | 21.64 | 1  | 5  | 5  | 13  | 1.001 | 0.879 | 0.648 | 0.752 | 27.81   | 21.64 | 9  | 13  | 134  | 14.5  | 9.50  |
| Q8B0H1   | Zinc finger C2HC domain-containing protein 1A OS=Mus musculus GN=Zc2hc1a PE=2 SV=1 - [ZC21A_MOUSE]         | 48.77 | 4  | 17 | 17 | 112 | 0.972 | 0.519 | 1.139 | 0.752 | 272.00  | 48.77 | 32 | 112 | 324  | 35.1  | 9.88  |
| A2A9X5   | 5'(3')-deoxyribonucleotidase, cytosolic type OS=Mus musculus GN=Nt5c PE=2 SV=1 - [A2A9X5_MOUSE]            | 57.22 | 1  | 1  | 8  | 52  | 1.998 | 1.243 | 0.723 | 0.753 | 176.57  | 57.22 | 15 | 52  | 194  | 21.9  | 5.33  |
| O70404   | Vesicle-associated membrane protein 8 OS=Mus musculus GN=Vamp8 PE=1 SV=1 - [VAMP8_MOUSE]                   | 16.83 | 1  | 2  | 2  | 16  | 0.852 | 1.086 | 0.661 | 0.753 | 32.70   | 16.83 | 4  | 16  | 101  | 11.4  | 8.19  |
| A2A3G1   | Acyl-CoA-binding domain-containing protein 7 OS=Mus musculus GN=Acab7 PE=4 SV=1 - [A2A3G1_MOUSE]           | 11.36 | 2  | 1  | 1  | 2   | 1.782 | 2.134 | 0.703 | 0.753 | 6.56    | 11.36 | 1  | 2   | 88   | 10.0  | 5.55  |
| Q91VH1   | Adiponectin receptor protein 1 OS=Mus musculus GN=Adipor1 PE=1 SV=1 -                                      | 16.27 | 1  | 3  | 3  | 6   | 0.941 | 0.863 | 1.312 | 0.753 | 16.48   | 16.27 | 4  | 6   | 375  | 42.3  | 7.02  |
| Q8K4G5-2 | Isoform 2 of Actin-binding LIM protein 1 OS=Mus musculus GN=Ablm1 - [ABLM1_MOUSE]                          | 42.65 | 12 | 1  | 25 | 140 | 1.440 | 0.968 | 1.154 | 0.753 | 358.49  | 42.65 | 48 | 140 | 701  | 78.9  | 8.25  |
| Q91V58   | FERM, RhoGEF and pleckstrin domain-containing protein 2 OS=Mus musculus GN=Farp2 PE=1 SV=2 - [FARP2_MOUSE] | 3.00  | 2  | 3  | 4  | 5   | 0.485 | 1.007 | 0.704 | 0.753 | 11.87   | 3.00  | 5  | 5   | 1065 | 121.2 | 8.44  |
| Q99N11   | Dual specificity protein phosphatase 22 OS=Mus musculus GN=Dusp22 PE=1 SV=1 -                              | 14.67 | 2  | 2  | 2  | 8   | 0.730 | 0.629 | 0.604 | 0.753 | 28.85   | 14.67 | 4  | 8   | 184  | 21.0  | 7.83  |
| Q3UEB3-2 | Isoform 2 of Poly(U)-binding-splicing factor PUF60 OS=Mus musculus GN=Puf60 - [PUF60_MOUSE]                | 40.77 | 2  | 1  | 20 | 66  | 0.928 | 0.991 | 0.731 | 0.753 | 215.86  | 40.77 | 34 | 66  | 547  | 58.5  | 5.35  |
| D3Z7C0   | 39S ribosomal protein L40, mitochondrial OS=Mus musculus GN=Mrip40 PE=2 SV=1 - [D3Z7C0_MOUSE]              | 36.42 | 4  | 5  | 5  | 21  | 1.134 | 0.629 | 0.948 | 0.753 | 52.92   | 36.42 | 10 | 21  | 162  | 19.4  | 9.19  |
| Q9R0X5   | X-linked retinitis pigmentosa GTPase regulator OS=Mus musculus GN=Rpgr PE=1 SV=2 - [RPGR_MOUSE]            | 7.49  | 9  | 2  | 6  | 9   | 0.902 | 1.049 | 1.216 | 0.753 | 19.22   | 7.49  | 9  | 9   | 1001 | 111.7 | 4.61  |
| O88968   | Transcobalamin-2 OS=Mus musculus GN=Tcn2 PE=2 SV=1 - [TCO2_MOUSE]                                          | 10.23 | 1  | 3  | 3  | 6   | 2.898 | 1.534 | 0.838 | 0.754 | 17.51   | 10.23 | 4  | 6   | 430  | 47.6  | 6.33  |
| Q9JHL1   | Na(+)/H(+) exchange regulatory cofactor NHE-RF2 OS=Mus musculus GN=Slc9a3r2 PE=1 SV=2 - [NHRF2_MOUSE]      | 45.40 | 2  | 13 | 13 | 48  | 1.447 | 0.654 | 0.882 | 0.754 | 131.01  | 45.40 | 22 | 48  | 337  | 37.4  | 7.59  |
| Q9JDX0   | Enhancer of yellow 2 transcription factor homolog OS=Mus musculus GN=Eny2 PE=2 SV=1 - [ENY2_MOUSE]         | 53.47 | 1  | 6  | 6  | 13  | 1.349 | 0.990 | 0.943 | 0.754 | 33.26   | 53.47 | 7  | 13  | 101  | 11.5  | 9.33  |
| E9Q7G1   | Protein Tmed7 OS=Mus musculus GN=Tmed7 PE=2 SV=1 - [E9Q7G1_MOUSE]                                          | 28.19 | 2  | 4  | 4  | 15  | 0.930 | 0.913 | 0.714 | 0.754 | 57.45   | 28.19 | 8  | 15  | 188  | 21.3  | 6.20  |
| D3YWX2   | YLP motif-containing protein 1 OS=Mus musculus GN=Ylpm1 PE=2 SV=2 - [D3YWX2_MOUSE]                         | 20.48 | 4  | 33 | 34 | 132 | 1.062 | 0.758 | 1.137 | 0.754 | 368.36  | 20.48 | 59 | 132 | 2139 | 240.9 | 6.68  |
| Q3U8Y1   | 28S ribosomal protein S11, mitochondrial OS=Mus musculus GN=Mrip11 PE=2 SV=1 - [Q3U8Y1_MOUSE]              | 28.80 | 2  | 4  | 4  | 11  | 0.751 | 0.498 | 1.048 | 0.755 | 46.11   | 28.80 | 7  | 11  | 191  | 20.2  | 10.95 |
| Q9CQI3   | Glia maturation factor beta OS=Mus musculus GN=Gmfb PE=1 SV=3 - [GMFB_MOUSE]                               | 65.49 | 2  | 6  | 8  | 117 | 2.006 | 1.212 | 0.965 | 0.755 | 355.73  | 65.49 | 16 | 117 | 142  | 16.7  | 5.16  |
| A2AIR4   | Protein Grin3a OS=Mus musculus GN=Grin3a PE=2 SV=1 - [A2AIR4_MOUSE]                                        | 9.24  | 4  | 8  | 9  | 18  | 1.308 | 1.416 | 0.865 | 0.755 | 42.00   | 9.24  | 14 | 18  | 1115 | 125.0 | 7.09  |



|          |                                                                                                                |       |    |    |    |     |       |       |       |       |         |       |    |     |      |       |      |
|----------|----------------------------------------------------------------------------------------------------------------|-------|----|----|----|-----|-------|-------|-------|-------|---------|-------|----|-----|------|-------|------|
| A2TJV2   | Paralemmin-3 OS=Mus musculus GN=Paln3 PE=2 SV=1 - [PALM3_MOUSE]                                                | 11.58 | 1  | 6  | 6  | 14  | 1.545 | 0.656 | 0.973 | 0.755 | 41.53   | 11.58 | 10 | 14  | 734  | 78.7  | 4.50 |
| P14869   | 60S acidic ribosomal protein P0 OS=Mus musculus GN=Rplp0 PE=1 SV=3 - [RLA0_MOUSE]                              | 40.06 | 2  | 1  | 13 | 65  | 0.468 | 0.846 | 0.696 | 0.755 | 160.23  | 40.06 | 24 | 65  | 317  | 34.2  | 6.25 |
| Q3UGC7   | Eukaryotic translation initiation factor 3 subunit J-A OS=Mus musculus GN=EIF31 PE=2 SV=1 - [EIF3A_MOUSE]      | 34.10 | 2  | 11 | 11 | 72  | 1.165 | 0.493 | 1.033 | 0.755 | 206.68  | 34.10 | 20 | 72  | 261  | 29.3  | 4.81 |
| Q8R048   | C-Myc-binding protein OS=Mus musculus GN=Mycbp PE=4 SV=1 - [Q8R048_MOUSE]                                      | 53.40 | 2  | 4  | 4  | 8   | 1.125 | 0.766 | 0.716 | 0.755 | 21.66   | 53.40 | 6  | 8   | 103  | 12.0  | 5.91 |
| Q00899   | Transcriptional repressor protein YY1 OS=Mus musculus GN=Yy1 PE=1 SV=1 - [TTY1_MOUSE]                          | 21.01 | 4  | 6  | 6  | 10  | 0.694 | 0.746 | 0.995 | 0.755 | 23.01   | 21.01 | 8  | 10  | 414  | 44.7  | 6.29 |
| A2AUM2   | Eukaryotic translation initiation factor 2-alpha kinase 4 OS=Mus musculus GN=Ef2ak4 PE=2 SV=1 - [EF2AK4_MOUSE] | 6.35  | 10 | 8  | 8  | 13  | 1.103 | 0.791 | 0.759 | 0.755 | 25.58   | 6.35  | 10 | 13  | 1527 | 173.0 | 6.46 |
| Q9D668   | Arrestin domain-containing protein 2 OS=Mus musculus GN=Aradc2 PE=2 SV=1 - [ARADC2_MOUSE]                      | 6.14  | 1  | 2  | 2  | 2   | 1.055 | 0.879 | 0.528 | 0.755 | 4.73    | 6.14  | 2  | 2   | 407  | 44.2  | 9.14 |
| Q91VM5   | RNA binding motif protein, X-linked-like-1 OS=Mus musculus GN=Rbmx1 PE=1 SV=1 - [RBMX1_MOUSE]                  | 34.02 | 1  | 2  | 13 | 97  | 0.934 | 0.412 | 1.252 | 0.755 | 260.19  | 34.02 | 25 | 97  | 388  | 42.1  | 9.99 |
| A2AFR3-2 | Isoform 2 of FERM and PDZ domain-containing protein 4 OS=Mus musculus GN=Frmpd4 - [FRPD4_MOUSE]                | 5.23  | 3  | 5  | 5  | 9   | 0.940 | 1.101 | 1.160 | 0.755 | 30.94   | 5.23  | 7  | 9   | 1280 | 140.4 | 5.20 |
| Q80WJ7   | Protein LYRIC OS=Mus musculus GN=Mtdh PE=1 SV=1 - [LYRIC_MOUSE]                                                | 34.72 | 5  | 12 | 17 | 76  | 0.716 | 0.649 | 0.980 | 0.755 | 195.26  | 34.72 | 30 | 76  | 579  | 63.8  | 9.33 |
| Q8BYU6   | Torsin-1A-interacting protein 2 OS=Mus musculus GN=Tor1aip2 PE=1 SV=1 - [TOR1AIP2_MOUSE]                       | 7.77  | 1  | 3  | 3  | 4   | 1.250 | 1.162 | 0.905 | 0.755 | 6.71    | 7.77  | 4  | 4   | 502  | 54.5  | 4.86 |
| Q921C3-2 | Isoform B of Bromodomain and WD repeat-containing protein 1 OS=Mus musculus GN=Brwd1 - [BRWD1_MOUSE]           | 4.12  | 6  | 5  | 5  | 8   | 1.040 | 1.729 | 0.991 | 0.756 | 5.03    | 4.12  | 6  | 8   | 2259 | 253.8 | 8.19 |
| G3X9V7   | MCG19133, isoform CRA_b OS=Mus musculus GN=A830010M20Rik PE=4 SV=1 - [G3X9V7_MOUSE]                            | 37.50 | 3  | 1  | 31 | 128 | 0.748 | 0.939 | 1.921 | 0.756 | 389.66  | 37.50 | 50 | 128 | 1088 | 117.2 | 7.80 |
| Q8BQ47   | Protein canopy homolog 4 OS=Mus musculus GN=Cnpy4 PE=1 SV=1 - [CNPY4_MOUSE]                                    | 26.94 | 2  | 6  | 6  | 21  | 1.815 | 1.024 | 0.903 | 0.756 | 63.15   | 26.94 | 11 | 21  | 245  | 28.1  | 4.77 |
| Q3UMQ8   | H/ACA ribonucleoprotein complex non-core subunit NAF1 OS=Mus musculus GN=Naf1 PE=1 SV=2 - [NAF1_MOUSE]         | 3.48  | 2  | 1  | 1  | 4   | 2.254 | 0.953 | 0.929 | 0.756 | 8.64    | 3.48  | 2  | 4   | 489  | 53.2  | 5.16 |
| P60879-2 | Isoform 2 of Synaptosomal associated protein 25 OS=Mus musculus GN=Snap25 - [SNP25_MOUSE]                      | 66.99 | 1  | 3  | 17 | 790 | 1.047 | 2.093 | 1.557 | 0.756 | 2151.59 | 66.99 | 34 | 790 | 206  | 23.3  | 4.86 |
| Q62000   | Mimecan OS=Mus musculus GN=Ogn PE=2 SV=1 - [MIME_MOUSE]                                                        | 20.47 | 1  | 4  | 4  | 7   | 0.841 | 6.356 | 0.728 | 0.756 | 17.98   | 20.47 | 6  | 7   | 298  | 34.0  | 5.74 |
| Q9D2R0   | Acetoacetyl-CoA synthetase OS=Mus musculus GN=Aacs PE=1 SV=1 - [AACS_MOUSE]                                    | 20.98 | 1  | 16 | 16 | 59  | 0.971 | 0.549 | 0.627 | 0.756 | 132.67  | 20.98 | 29 | 59  | 672  | 75.2  | 6.71 |
| G8JL54   | COMM domain-containing protein 1 (Fragment) OS=Mus musculus GN=Comm1 PE=2 SV=1 - [G8JL54_MOUSE]                | 19.35 | 1  | 1  | 2  | 6   | 5.632 | 0.824 | 0.884 | 0.756 | 14.90   | 19.35 | 3  | 6   | 93   | 10.3  | 5.19 |
| E9Q774   | Protein Akap11 OS=Mus musculus GN=Akap11 PE=2 SV=1 - [E9Q774_MOUSE]                                            | 4.07  | 2  | 7  | 7  | 14  | 0.781 | 0.735 | 0.705 | 0.757 | 32.15   | 4.07  | 10 | 14  | 1894 | 208.6 | 5.36 |
| Q8K190   | SAYSvFN domain-containing protein 1 OS=Mus musculus GN=Saysd1 PE=2 SV=1 - [SAYSvFN_MOUSE]                      | 32.98 | 1  | 3  | 3  | 7   | 1.004 | 0.983 | 0.761 | 0.757 | 13.45   | 32.98 | 3  | 7   | 188  | 20.7  | 8.60 |
| Q9D5V6   | Synapse-associated protein 1 OS=Mus musculus GN=Syap1 PE=1 SV=1 - [SYAP1_MOUSE]                                | 34.25 | 1  | 14 | 14 | 44  | 1.318 | 1.132 | 1.112 | 0.757 | 96.79   | 34.25 | 23 | 44  | 365  | 41.3  | 4.54 |
| Q9JLM8   | Serine/threonine-protein kinase DCLK1 OS=Mus musculus GN=Dcl1 PE=1 SV=1 - [DCLK1_MOUSE]                        | 41.01 | 2  | 10 | 29 | 159 | 1.097 | 1.073 | 1.196 | 0.757 | 506.93  | 41.01 | 49 | 159 | 756  | 84.1  | 8.87 |
| Q88455   | 7-dehydrocholesterol reductase OS=Mus musculus GN=Dhcr7 PE=2 SV=1 - [DHCR7_MOUSE]                              | 9.13  | 2  | 3  | 3  | 6   | 0.777 | 0.537 | 0.749 | 0.757 | 13.71   | 9.13  | 4  | 6   | 471  | 53.9  | 8.35 |
| Q922P8   | Transmembrane protein 132A OS=Mus musculus GN=Tmem132a PE=2 SV=2 - [T132A_MOUSE]                               | 20.04 | 2  | 13 | 13 | 58  | 0.732 | 0.993 | 0.782 | 0.758 | 140.39  | 20.04 | 22 | 58  | 1018 | 110.2 | 5.63 |

|          |                                                                                                             |       |   |    |    |     |       |       |       |       |         |       |     |     |      |       |       |
|----------|-------------------------------------------------------------------------------------------------------------|-------|---|----|----|-----|-------|-------|-------|-------|---------|-------|-----|-----|------|-------|-------|
| P62270   | 40S ribosomal protein S18<br>OS=Mus musculus<br>GN=Rps18 PE=1 SV=3 -<br>[RS18_MOUSE]                        | 49.34 | 4 | 11 | 11 | 47  | 0.448 | 0.572 | 0.652 | 0.758 | 130.10  | 49.34 | 16  | 47  | 152  | 17.7  | 10.99 |
| P58044   | Isopentenyl-diphosphate<br>Delta-isomerase 1<br>OS=Mus musculus<br>GN=Idi1 PE=2 SV=1 -<br>[IDI1_MOUSE]      | 51.54 | 5 | 14 | 14 | 37  | 2.651 | 0.704 | 0.831 | 0.758 | 104.21  | 51.54 | 22  | 37  | 227  | 26.3  | 6.16  |
| Q9CYS7-3 | Isoform 3 of Chromatin<br>target of PRMT1 protein<br>OS=Mus musculus<br>GN=Chtop -                          | 40.59 | 8 | 7  | 7  | 49  | 0.698 | 0.571 | 0.921 | 0.758 | 148.02  | 40.59 | 11  | 49  | 202  | 22.0  | 11.97 |
| P63147   | Ubiquitin-conjugating<br>enzyme E2 B OS=Mus<br>musculus GN=Ube2b<br>PE=1 SV=1 -                             | 19.08 | 1 | 2  | 2  | 9   | 1.793 | 1.271 | 1.134 | 0.758 | 16.03   | 19.08 | 3   | 9   | 152  | 17.3  | 5.01  |
| Q55XJ3   | Fanconi anemia group J<br>protein homolog OS=Mus<br>musculus GN=Brip1 PE=2<br>SV=1 - [FANCI_MOUSE]          | 1.53  | 1 | 1  | 1  | 1   | 0.820 | 1.164 | 0.914 | 0.758 | 0.00    | 1.53  | 1   | 1   | 1174 | 131.3 | 7.50  |
| Q9D1N9   | 39S ribosomal protein L21,<br>mitochondrial OS=Mus<br>musculus GN=MipL21<br>PE=2 SV=1 -<br>[RM21_MOUSE]     | 18.66 | 2 | 3  | 3  | 6   | 0.567 | 0.668 | 0.812 | 0.759 | 18.57   | 18.66 | 5   | 6   | 209  | 23.4  | 9.99  |
| E9PV60   | Protein Wdfy4 OS=Mus<br>musculus GN=Wdfy4<br>PE=2 SV=1 -<br>[E9PV60_MOUSE]                                  | 1.36  | 2 | 2  | 4  | 4   | 1.898 | 1.869 | 1.637 | 0.759 | 3.97    | 1.36  | 4   | 4   | 3024 | 337.1 | 6.35  |
| P97473   | RISC-loading complex<br>subunit TARBP2 OS=Mus<br>musculus GN=Tarbp2<br>PE=1 SV=2 -<br>[TRBP2_MOUSE]         | 4.93  | 6 | 2  | 2  | 6   | 1.781 | 1.064 | 0.831 | 0.759 | 13.27   | 4.93  | 4   | 6   | 365  | 38.8  | 6.01  |
| O09127   | Ephrin type-A receptor 8<br>OS=Mus musculus<br>GN=Epha8 PE=1 SV=2 -<br>[EPHA8_MOUSE]                        | 3.09  | 3 | 2  | 3  | 6   | 1.142 | 0.521 | 0.927 | 0.759 | 11.60   | 3.09  | 4   | 6   | 1004 | 110.6 | 7.94  |
| Q99KG3-3 | Isoform 3 of RNA-binding<br>protein 10 OS=Mus<br>musculus GN=Rbm10 -<br>[RBM10_MOUSE]                       | 28.20 | 3 | 19 | 22 | 50  | 1.178 | 0.626 | 0.881 | 0.759 | 139.68  | 28.20 | 33  | 50  | 929  | 103.3 | 5.92  |
| Q8VDU0   | G-protein-signaling<br>modulator 2 OS=Mus<br>musculus GN=Gpsm2<br>PE=1 SV=2 -                               | 10.16 | 2 | 3  | 6  | 9   | 1.580 | 0.393 | 0.948 | 0.759 | 30.09   | 10.16 | 9   | 9   | 679  | 75.5  | 6.95  |
| Q99J23   | GH3 domain-containing<br>protein OS=Mus musculus<br>GN=Ghdc PE=2 SV=2 -<br>[GHDC_MOUSE]                     | 1.88  | 1 | 1  | 1  | 2   | 0.949 | 0.767 | 0.814 | 0.759 | 6.94    | 1.88  | 2   | 2   | 532  | 58.5  | 7.56  |
| Q9QUR6   | Prolyl endopeptidase<br>OS=Mus musculus<br>GN=Prep PE=2 SV=1 -<br>[PPCE_MOUSE]                              | 51.69 | 1 | 29 | 29 | 133 | 0.608 | 0.749 | 0.798 | 0.759 | 399.60  | 51.69 | 52  | 133 | 710  | 80.7  | 5.73  |
| Q9QW16   | SRC kinase signaling<br>inhibitor 1 OS=Mus<br>musculus GN=Srcn1 PE=1<br>SV=2 - [SRCN1_MOUSE]                | 61.76 | 4 | 2  | 67 | 453 | 0.739 | 0.670 | 1.337 | 0.760 | 1420.49 | 61.76 | 125 | 453 | 1250 | 134.8 | 9.32  |
| Q3ULB0   | Protein Rbm6 OS=Mus<br>musculus GN=Rbm6 PE=2<br>SV=1 - [Q3ULB0_MOUSE]                                       | 12.68 | 1 | 10 | 12 | 23  | 1.386 | 0.763 | 0.973 | 0.760 | 54.77   | 12.68 | 17  | 23  | 986  | 113.6 | 6.20  |
| Q8BQ46   | Protein Taf15 OS=Mus<br>musculus GN=Taf15 PE=2<br>SV=1 - [Q8BQ46_MOUSE]                                     | 21.54 | 2 | 4  | 8  | 48  | 1.258 | 0.622 | 0.948 | 0.760 | 129.69  | 21.54 | 12  | 48  | 557  | 58.6  | 8.40  |
| Q3URQ4   | Protein C78339 OS=Mus<br>musculus GN=C78339<br>PE=2 SV=1 -<br>[Q3URQ4_MOUSE]                                | 7.77  | 1 | 2  | 2  | 6   | 0.849 | 0.892 | 0.896 | 0.760 | 26.45   | 7.77  | 3   | 6   | 399  | 42.3  | 6.71  |
| P51807   | Dynein light chain Tctex-<br>type 1 OS=Mus musculus<br>GN=Dynlt1 PE=1 SV=1 -<br>[DYLT1_MOUSE]               | 14.16 | 1 | 1  | 1  | 4   | 1.022 | 0.626 | 0.680 | 0.760 | 14.01   | 14.16 | 2   | 4   | 113  | 12.5  | 5.08  |
| Q61074   | Protein phosphatase 1G<br>OS=Mus musculus<br>GN=Ppm1g PE=2 SV=3 -<br>[PPM1G_MOUSE]                          | 23.80 | 1 | 12 | 12 | 39  | 1.144 | 0.875 | 0.989 | 0.760 | 104.43  | 23.80 | 21  | 39  | 542  | 58.7  | 4.39  |
| Q8VDY9   | Caspase activity and<br>apoptosis inhibitor 1<br>OS=Mus musculus<br>GN=Caap1 PE=1 SV=2 -<br>[CAAP1_MOUSE]   | 29.78 | 1 | 5  | 5  | 12  | 1.347 | 0.738 | 0.934 | 0.760 | 28.86   | 29.78 | 7   | 12  | 356  | 37.8  | 4.72  |
| Q5EBP8   | Heterogeneous nuclear<br>ribonucleoprotein A1<br>OS=Mus musculus<br>GN=Hnmpa1 PE=2 SV=1 -<br>[Q5EBP8_MOUSE] | 56.30 | 4 | 14 | 17 | 272 | 1.671 | 0.711 | 0.959 | 0.760 | 874.56  | 56.30 | 30  | 272 | 373  | 38.8  | 9.13  |
| Q99020   | Heterogeneous nuclear<br>ribonucleoprotein A/B<br>OS=Mus musculus<br>GN=Hnmpab PE=1 SV=1 -<br>[ROAA_MOUSE]  | 42.81 | 3 | 12 | 13 | 102 | 1.138 | 0.540 | 1.074 | 0.760 | 279.81  | 42.81 | 22  | 102 | 285  | 30.8  | 7.91  |
| E9QAH1   | Protein Golgb1 OS=Mus<br>musculus GN=Golgb1<br>PE=2 SV=1 -<br>[E9QAH1_MOUSE]                                | 34.59 | 5 | 94 | 98 | 255 | 1.716 | 0.970 | 0.937 | 0.761 | 733.77  | 34.59 | 151 | 255 | 3197 | 365.1 | 5.06  |
| P70663   | SPARC-like protein 1<br>OS=Mus musculus<br>GN=Spard1 PE=1 SV=3 -<br>[SPRL1_MOUSE]                           | 34.77 | 1 | 20 | 20 | 122 | 1.783 | 0.716 | 0.820 | 0.761 | 389.47  | 34.77 | 36  | 122 | 650  | 72.2  | 4.60  |
| Q9CWM2   | Cell division cycle-<br>associated protein 4<br>OS=Mus musculus<br>GN=Cdc4 PE=2 SV=2 -<br>[CDC4_MOUSE]      | 4.22  | 1 | 1  | 1  | 4   | 3.437 | 1.531 | 1.122 | 0.761 | 13.44   | 4.22  | 1   | 4   | 237  | 26.1  | 4.56  |

|          |                                                                                                                                                      |       |   |    |    |     |       |       |       |       |        |       |    |     |      |       |       |
|----------|------------------------------------------------------------------------------------------------------------------------------------------------------|-------|---|----|----|-----|-------|-------|-------|-------|--------|-------|----|-----|------|-------|-------|
| Q9D0E3   | LysM and putative peptidoglycan-binding domain-containing protein 1 OS=Mus musculus GN=Lysmd1 PE=1 SV=1 - [Lysmd1_MOUSE]                             | 53.98 | 1 | 9  | 11 | 51  | 1.358 | 0.609 | 1.039 | 0.761 | 167.08 | 53.98 | 20 | 51  | 226  | 24.8  | 8.92  |
| Q60750   | Ephrin type-A receptor 1 OS=Mus musculus GN=Epha1 PE=1 SV=2 - [Epha1_MOUSE]                                                                          | 1.74  | 1 | 2  | 2  | 3   | 3.595 | 1.652 | 1.366 | 0.762 | 4.53   | 1.74  | 3  | 3   | 977  | 108.5 | 6.33  |
| Q8CCH2   | NHL repeat-containing protein 3 OS=Mus musculus GN=Nhlrc3 PE=2 SV=1 - [Nhlrc3_MOUSE]                                                                 | 23.34 | 2 | 5  | 5  | 7   | 2.515 | 1.164 | 0.643 | 0.762 | 15.59  | 23.34 | 7  | 7   | 347  | 38.2  | 6.23  |
| O08912   | Polypeptide N-acetylgalactosaminyltransferase 1 OS=Mus musculus GN=Galnt1 PE=1 SV=1 - [Galnt1_MOUSE]                                                 | 10.02 | 1 | 4  | 5  | 15  | 0.789 | 0.744 | 0.630 | 0.762 | 32.34  | 10.02 | 8  | 15  | 559  | 64.2  | 7.71  |
| Q60648   | Ganglioside GM2 activator OS=Mus musculus GN=Gn2a PE=1 SV=2 - [Gn2a_MOUSE]                                                                           | 16.06 | 1 | 4  | 4  | 11  | 2.223 | 0.833 | 0.935 | 0.762 | 22.35  | 16.06 | 6  | 11  | 193  | 20.8  | 5.90  |
| P58404-2 | Isoform 2 of Striatin-4 OS=Mus musculus GN=Strn4 - [Strn4_MOUSE]                                                                                     | 35.99 | 2 | 13 | 19 | 61  | 0.894 | 1.495 | 1.216 | 0.762 | 204.70 | 35.99 | 32 | 61  | 753  | 80.9  | 5.38  |
| D3Z3Z8   | DNA-directed RNA polymerase II subunit RPB9 (Fragment) OS=Mus musculus GN=Polr2l PE=2 SV=1 - [D3Z3Z8_MOUSE]                                          | 43.37 | 3 | 3  | 3  | 13  | 1.632 | 1.105 | 1.174 | 0.762 | 35.08  | 43.37 | 5  | 13  | 83   | 9.6   | 5.17  |
| P32233   | Developmentally-regulated GTP-binding protein 1 OS=Mus musculus GN=Drig1 PE=1 SV=1 - [Drig1_MOUSE]                                                   | 40.60 | 2 | 13 | 14 | 34  | 0.741 | 0.965 | 0.826 | 0.762 | 97.27  | 40.60 | 21 | 34  | 367  | 40.5  | 8.90  |
| Q09143   | High affinity cationic amino acid transporter 1 OS=Mus musculus GN=Slc7a1 PE=2 SV=1 - [Slc7a1_MOUSE]                                                 | 9.32  | 2 | 2  | 4  | 9   | 0.699 | 0.607 | 0.667 | 0.762 | 28.85  | 9.32  | 5  | 9   | 622  | 67.0  | 7.06  |
| Q5SN20-2 | Isoform 2 of Grdin OS=Mus musculus GN=Ccdc88a - [Ccdc88a_MOUSE]                                                                                      | 35.72 | 4 | 57 | 59 | 165 | 1.272 | 0.860 | 1.195 | 0.762 | 445.52 | 35.72 | 94 | 165 | 1845 | 212.4 | 5.99  |
| Q8BG81   | Polymerase delta-interacting protein 3 OS=Mus musculus GN=Poldip3 PE=2 SV=1 - [Poldip3_MOUSE]                                                        | 40.95 | 3 | 13 | 13 | 43  | 1.142 | 0.830 | 1.002 | 0.762 | 134.08 | 40.95 | 23 | 43  | 420  | 46.1  | 10.05 |
| Q9WU60   | Attractin OS=Mus musculus GN=Atm PE=2 SV=3 - [Atm_MOUSE]                                                                                             | 5.67  | 1 | 8  | 8  | 17  | 1.188 | 0.914 | 1.059 | 0.762 | 37.52  | 5.67  | 14 | 17  | 1428 | 158.0 | 7.27  |
| Q6A0A2   | La-related protein 4B OS=Mus musculus GN=Larp4b PE=1 SV=2 - [Larp4b_MOUSE]                                                                           | 28.48 | 3 | 17 | 17 | 42  | 1.111 | 0.715 | 0.899 | 0.762 | 111.71 | 28.48 | 33 | 42  | 741  | 81.6  | 7.49  |
| P29387   | Guanine nucleotide-binding protein subunit beta-4 OS=Mus musculus GN=Gnb4 PE=2 SV=4 - [Gnb4_MOUSE]                                                   | 38.24 | 1 | 7  | 10 | 71  | 0.990 | 0.765 | 0.893 | 0.763 | 234.17 | 38.24 | 18 | 71  | 340  | 37.4  | 6.16  |
| E9Q4Q2   | Splicing factor 1 OS=Mus musculus GN=Sf1 PE=2 SV=1 - [E9Q4Q2_MOUSE]                                                                                  | 25.91 | 9 | 9  | 11 | 31  | 1.146 | 0.580 | 1.029 | 0.763 | 79.50  | 25.91 | 19 | 31  | 548  | 59.7  | 9.50  |
| F6ZL86   | DnaJ homolog subfamily C member 1 (Fragment) OS=Mus musculus GN=Dnajc1 PE=4 SV=1 - [F6ZL86_MOUSE]                                                    | 10.08 | 2 | 3  | 3  | 5   | 1.317 | 0.581 | 0.764 | 0.763 | 15.27  | 10.08 | 5  | 5   | 357  | 41.1  | 5.99  |
| Q8K2Q9-2 | Isoform 2 of Shootin-1 OS=Mus musculus GN=Kiaa1598 - [Shootin1_MOUSE]                                                                                | 44.30 | 2 | 14 | 15 | 66  | 1.445 | 0.906 | 1.092 | 0.763 | 157.59 | 44.30 | 26 | 66  | 456  | 52.6  | 5.55  |
| Q8R4S0   | Protein phosphatase 1C regulatory subunit 14C OS=Mus musculus GN=Ppp1r14c PE=1 SV=1 [Pp14c_MOUSE]                                                    | 28.66 | 1 | 3  | 3  | 13  | 1.510 | 0.494 | 0.885 | 0.763 | 28.08  | 28.66 | 4  | 13  | 164  | 17.7  | 5.27  |
| Q9CSV6   | Vesicle transport protein SFT2C OS=Mus musculus GN=Sft2c3 PE=2 SV=2 - [Sft2c3_MOUSE]                                                                 | 6.70  | 2 | 1  | 1  | 3   | 1.029 | 0.695 | 0.635 | 0.764 | 7.56   | 6.70  | 2  | 3   | 209  | 21.6  | 10.08 |
| B1AU22   | Fibroblast growth factor 13 (Fragment) OS=Mus musculus GN=Pgf13 PE=2 SV=1 - [B1AU22_MOUSE]                                                           | 37.21 | 3 | 1  | 1  | 4   | 0.995 | 0.897 | 0.664 | 0.764 | 14.68  | 37.21 | 2  | 4   | 43   | 4.8   | 6.65  |
| Q9WVH9   | Fibulin-5 OS=Mus musculus GN=Fbln5 PE=2 SV=1 - [Fbln5_MOUSE]                                                                                         | 18.08 | 1 | 7  | 7  | 33  | 0.369 | 1.345 | 0.585 | 0.764 | 88.95  | 18.08 | 14 | 33  | 448  | 50.2  | 4.70  |
| O54941   | SWI/SNF-related matrix-associated actin-dependent regulator of chromatin subfamily E member 1 OS=Mus musculus GN=Smarca1 PE=1 SV=1 - [Smarca1_MOUSE] | 23.60 | 1 | 10 | 10 | 28  | 1.216 | 1.021 | 0.975 | 0.764 | 88.09  | 23.60 | 16 | 28  | 411  | 46.6  | 4.88  |
| Q9DBG6   | Dolichyl-diphosphooligosaccharide--protein glycosyltransferase subunit 2 OS=Mus musculus GN=Rgn2 PE=2 SV=1 - [Rgn2_MOUSE]                            | 51.19 | 2 | 18 | 18 | 66  | 0.597 | 0.818 | 0.652 | 0.764 | 214.65 | 51.19 | 30 | 66  | 631  | 69.0  | 5.81  |
| O88573   | AF4/FMR2 family member 1 OS=Mus musculus GN=Aff1 PE=2 SV=2 - [Aff1_MOUSE]                                                                            | 3.78  | 4 | 3  | 3  | 6   | 1.291 | 0.776 | 0.744 | 0.764 | 2.00   | 3.78  | 4  | 6   | 1216 | 131.5 | 9.33  |

|          |                                                                                                              |       |    |    |     |     |       |       |       |       |         |       |     |     |      |       |      |
|----------|--------------------------------------------------------------------------------------------------------------|-------|----|----|-----|-----|-------|-------|-------|-------|---------|-------|-----|-----|------|-------|------|
| P08207   | Protein S100-A10 OS=Mus musculus GN=S100a10 PE=2 SV=2 - [S10AA_MOUSE]                                        | 17.53 | 1  | 3  | 3   | 19  | 1.487 | 5.506 | 0.691 | 0.764 | 52.06   | 17.53 | 5   | 19  | 97   | 11.2  | 6.77 |
| D3Z6C3   | 40S ribosomal protein S3a OS=Mus musculus GN=Rps3a2 PE=3 SV=1 - [D3Z6C3_MOUSE]                               | 51.89 | 3  | 14 | 14  | 63  | 0.496 | 0.631 | 0.702 | 0.764 | 187.11  | 51.89 | 24  | 63  | 264  | 29.8  | 9.73 |
| Q8BK12   | Trinucleotide repeat-containing gene 6B protein OS=Mus musculus GN=Tnrc6b PE=2 SV=2 - [TNR6B_MOUSE]          | 20.72 | 2  | 27 | 27  | 99  | 1.422 | 0.896 | 1.023 | 0.765 | 284.93  | 20.72 | 42  | 99  | 1810 | 191.8 | 6.30 |
| Q9D0K1   | Peroxisomal membrane protein PEX13 OS=Mus musculus GN=Pex13 PE=1 SV=1 - [PEX13_MOUSE]                        | 12.59 | 1  | 3  | 3   | 5   | 0.915 | 0.770 | 0.699 | 0.765 | 15.40   | 12.59 | 5   | 5   | 405  | 44.6  | 7.53 |
| Q9Z0H8   | CAP-Gly domain-containing linker protein 2 OS=Mus musculus GN=Clp2 PE=1 SV=2 - [CLIP2_MOUSE]                 | 56.06 | 6  | 1  | 58  | 282 | 1.481 | 0.879 | 1.202 | 0.765 | 806.64  | 56.06 | 101 | 282 | 1047 | 115.8 | 6.48 |
| F8VFK8   | Protein Pcdh9 OS=Mus musculus GN=Pcdh9 PE=2 SV=1 - [F8VFK8_MOUSE]                                            | 27.24 | 1  | 24 | 25  | 76  | 0.923 | 0.732 | 0.971 | 0.765 | 179.48  | 27.24 | 43  | 76  | 1237 | 136.1 | 5.50 |
| O08997   | Copper transport protein ATOX1 OS=Mus musculus GN=Atox1 PE=2 SV=1 - [ATOX1_MOUSE]                            | 85.29 | 1  | 5  | 5   | 36  | 1.684 | 0.792 | 1.109 | 0.765 | 111.62  | 85.29 | 10  | 36  | 68   | 7.3   | 6.51 |
| Q9QZF2   | Glypican-1 OS=Mus musculus GN=Gpc1 PE=1 SV=1 - [GPC1_MOUSE]                                                  | 40.75 | 1  | 20 | 20  | 70  | 0.787 | 1.063 | 0.848 | 0.765 | 213.88  | 40.75 | 39  | 70  | 557  | 61.3  | 7.05 |
| H3BKQ3   | Protein Evi5l OS=Mus musculus GN=Evi5l PE=2 SV=1 - [H3BKQ3_MOUSE]                                            | 30.26 | 11 | 21 | 24  | 70  | 0.978 | 0.790 | 0.856 | 0.765 | 200.92  | 30.26 | 43  | 70  | 813  | 93.4  | 5.25 |
| Q9CQZ1   | Heat shock factor-binding protein 1 OS=Mus musculus GN=Hsbp1 PE=2 SV=1 - [HSBP1_MOUSE]                       | 72.37 | 1  | 4  | 4   | 52  | 1.236 | 1.445 | 0.970 | 0.765 | 164.20  | 72.37 | 8   | 52  | 76   | 8.6   | 4.31 |
| Q8CIC2-2 | Isoform 2 of Nucleoporin-like protein 2 OS=Mus musculus GN=Nupl2 - [NUPL2_MOUSE]                             | 20.00 | 3  | 2  | 2   | 13  | 1.410 | 1.169 | 0.959 | 0.765 | 19.94   | 20.00 | 4   | 13  | 160  | 17.6  | 9.25 |
| Q9CRD0   | OClA domain-containing protein 1 OS=Mus musculus GN=Oclad1 PE=1 SV=1 -                                       | 62.35 | 1  | 5  | 11  | 56  | 0.983 | 0.637 | 0.934 | 0.765 | 162.76  | 62.35 | 18  | 56  | 247  | 27.6  | 7.81 |
| Q99N13-3 | Isoform 3 of Histone deacetylase 9 OS=Mus musculus GN=Hdac9 - [HDAC9_MOUSE]                                  | 11.43 | 3  | 3  | 5   | 10  | 0.848 | 1.008 | 1.092 | 0.766 | 26.62   | 11.43 | 10  | 10  | 586  | 65.4  | 8.73 |
| Q9ERN0   | Secretory carrier-associated membrane protein 2 OS=Mus musculus GN=Scamp2 PE=2 SV=1 - [SCAMP2_MOUSE]         | 9.73  | 1  | 2  | 2   | 20  | 0.594 | 0.923 | 0.755 | 0.766 | 47.63   | 9.73  | 4   | 20  | 329  | 36.4  | 6.32 |
| Q8BWG9   | Calcium release-activated calcium channel protein 1 OS=Mus musculus GN=Orai1 PE=2 SV=1 - [CRCM1_MOUSE]       | 2.63  | 1  | 1  | 1   | 6   | 0.836 | 0.786 | 0.723 | 0.766 | 15.16   | 2.63  | 2   | 6   | 304  | 33.0  | 7.06 |
| AZAFG8   | Neural cell adhesion molecule L1 OS=Mus musculus GN=L1cam PE=2 SV=1 -                                        | 34.42 | 6  | 5  | 36  | 315 | 0.987 | 0.983 | 0.931 | 0.766 | 936.34  | 34.42 | 63  | 315 | 1255 | 140.3 | 5.96 |
| Q8BGZ1   | Hippocalcin-like protein 4 OS=Mus musculus GN=Hpcal4 PE=2 SV=3 - [HPCL4_MOUSE]                               | 80.63 | 2  | 9  | 14  | 205 | 1.098 | 2.897 | 1.103 | 0.766 | 522.53  | 80.63 | 26  | 205 | 191  | 22.2  | 4.89 |
| Q9CQC6   | Basic leucine zipper and W2 domain-containing protein 1 OS=Mus musculus GN=Bzw1 PE=1 SV=1 - [BZW1_MOUSE]     | 37.95 | 1  | 14 | 17  | 58  | 0.896 | 0.862 | 0.801 | 0.766 | 135.39  | 37.95 | 27  | 58  | 419  | 48.0  | 5.92 |
| Q8R3E3-2 | Isoform 2 of WD repeat domain phosphoinositide-interacting protein 1 OS=Mus musculus GN=Wipi1 - [WIP1_MOUSE] | 16.48 | 4  | 4  | 4   | 13  | 1.236 | 1.081 | 0.942 | 0.766 | 38.10   | 16.48 | 7   | 13  | 437  | 47.8  | 6.06 |
| Q64152-2 | Isoform 2 of Transcription factor BTF3 OS=Mus musculus GN=Btf3 - [BTF3_MOUSE]                                | 60.49 | 1  | 1  | 8   | 38  | 1.149 | 0.634 | 0.889 | 0.766 | 107.65  | 60.49 | 15  | 38  | 162  | 17.7  | 7.50 |
| F8VQ46   | Trichohyalin-like protein 1 OS=Mus musculus GN=Tchn1 PE=4 SV=1 - [F8VQ46_MOUSE]                              | 2.35  | 2  | 1  | 1   | 1   | 0.676 | 1.589 | 0.949 | 0.766 | 2.67    | 2.35  | 1   | 1   | 638  | 70.7  | 4.73 |
| Q9JHS9   | Spliceosome-associated protein CWC15 homolog OS=Mus musculus GN=Cwc15 PE=1 SV=1 - [CWC15_MOUSE]              | 16.59 | 1  | 5  | 5   | 12  | 1.092 | 0.561 | 1.101 | 0.766 | 25.56   | 16.59 | 8   | 12  | 229  | 26.6  | 5.71 |
| Q8K0P3   | TLD domain-containing protein 1 OS=Mus musculus GN=Tldc1 PE=2 SV=1 - [TLDCL_MOUSE]                           | 7.25  | 1  | 2  | 2   | 5   | 0.622 | 0.661 | 0.747 | 0.767 | 18.17   | 7.25  | 4   | 5   | 455  | 50.8  | 6.52 |
| P58021   | Transmembrane 9 superfamily member 2 OS=Mus musculus GN=Tm9sf2 PE=2 SV=1 - [TM9S2_MOUSE]                     | 13.14 | 2  | 8  | 8   | 24  | 0.698 | 0.826 | 0.721 | 0.767 | 90.13   | 13.14 | 12  | 24  | 662  | 75.3  | 7.43 |
| E9PVY8   | Microtubule-actin cross-linking factor 1 OS=Mus musculus GN=Macf1 PE=2 SV=2 - [E9PVY8_MOUSE]                 | 35.39 | 11 | 7  | 225 | 924 | 1.370 | 0.887 | 1.166 | 0.767 | 2661.50 | 35.39 | 395 | 924 | 7355 | 831.4 | 5.41 |

|          |                                                                                                                             |       |    |    |    |     |       |       |       |       |         |       |     |     |      |       |       |
|----------|-----------------------------------------------------------------------------------------------------------------------------|-------|----|----|----|-----|-------|-------|-------|-------|---------|-------|-----|-----|------|-------|-------|
| Q9Z2U1   | Proteasome subunit alpha type-5 OS=Mus musculus GN=PsmA5 PE=1 SV=1 - [PSA5_MOUSE]                                           | 51.04 | 1  | 2  | 9  | 108 | 1.104 | 0.984 | 0.645 | 0.767 | 390.46  | 51.04 | 17  | 108 | 241  | 26.4  | 4.79  |
| Q8BQU6   | Gap junction gamma-2 protein OS=Mus musculus GN=Gjc2 PE=1 SV=2 - [CXG2_MOUSE]                                               | 9.09  | 1  | 3  | 3  | 11  | 1.597 | 0.651 | 0.634 | 0.767 | 39.72   | 9.09  | 6   | 11  | 440  | 47.0  | 7.12  |
| P27546-2 | Isoform 2 of Microtubule-associated protein 4 OS=Mus musculus GN=Map4 -                                                     | 73.13 | 5  | 28 | 65 | 532 | 1.979 | 0.562 | 1.032 | 0.767 | 1413.89 | 73.13 | 118 | 532 | 1124 | 117.3 | 4.98  |
| F6RU18   | Protein Maskbp3 (Fragment) OS=Mus musculus GN=Ankhd1 PE=4 SV=1 -                                                            | 5.97  | 2  | 1  | 3  | 8   | 1.394 | 0.653 | 0.698 | 0.767 | 22.50   | 5.97  | 5   | 8   | 637  | 66.3  | 7.53  |
| Q9QYY0   | GRB2-associated-binding protein 1 OS=Mus musculus GN=Gab1 PE=1 SV=2 - [GAB1_MOUSE]                                          | 26.62 | 1  | 13 | 13 | 51  | 1.940 | 0.394 | 0.982 | 0.767 | 170.82  | 26.62 | 24  | 51  | 695  | 76.8  | 5.67  |
| Q9QX56   | Drebrin OS=Mus musculus GN=Dbrn1 PE=1 SV=4 - [DREB_MOUSE]                                                                   | 40.08 | 4  | 22 | 22 | 248 | 1.174 | 1.429 | 1.427 | 0.767 | 735.35  | 40.08 | 38  | 248 | 706  | 77.2  | 4.49  |
| Q80X50   | Ubiquitin-associated protein 2-like OS=Mus musculus GN=Ubp2l PE=1 SV=1 -                                                    | 22.13 | 5  | 19 | 19 | 199 | 1.526 | 0.938 | 1.177 | 0.768 | 489.47  | 22.13 | 34  | 199 | 1107 | 116.7 | 7.11  |
| P70211-3 | Isoform B of Netrin receptor DCC OS=Mus musculus GN=Dcc - [DCC_MOUSE]                                                       | 13.57 | 3  | 13 | 13 | 31  | 0.864 | 0.895 | 0.765 | 0.768 | 97.70   | 13.57 | 22  | 31  | 1363 | 149.3 | 6.62  |
| A2AG36   | GPI ethanolamine phosphate transferase 3 OS=Mus musculus GN=Pigo PE=2 SV=1 - [AZAG36_MOUSE]                                 | 5.33  | 4  | 4  | 4  | 9   | 0.640 | 1.154 | 0.693 | 0.768 | 28.07   | 5.33  | 8   | 9   | 1069 | 116.4 | 8.84  |
| E9QAS7   | Protein Inpp5a OS=Mus musculus GN=Inpp5a PE=2 SV=1 - [E9QAS7_MOUSE]                                                         | 32.46 | 1  | 1  | 16 | 43  | 1.024 | 0.960 | 0.788 | 0.768 | 111.21  | 32.46 | 26  | 43  | 422  | 48.8  | 7.09  |
| Q8BSL7   | ADP-ribosylation factor 2 OS=Mus musculus GN=Arf2 PE=1 SV=2 - [ARF2_MOUSE]                                                  | 57.46 | 5  | 1  | 10 | 171 | 0.681 | 0.753 | 0.603 | 0.768 | 519.08  | 57.46 | 18  | 171 | 181  | 20.7  | 6.58  |
| P23204   | Peroxisome proliferator-activated receptor alpha OS=Mus musculus GN=Ppara PE=1 SV=2 - [PPARA_MOUSE]                         | 2.14  | 1  | 1  | 1  | 1   | 1.232 | 1.213 | 1.710 | 0.768 | 0.00    | 2.14  | 1   | 1   | 468  | 52.3  | 6.15  |
| B1B034   | Protein Gm15155 OS=Mus musculus GN=Gm15155 PE=2 SV=1 - [B1B034_MOUSE]                                                       | 9.42  | 1  | 1  | 1  | 2   | 3.102 | 1.527 | 0.515 | 0.768 | 0.00    | 9.42  | 1   | 2   | 138  | 15.6  | 9.25  |
| F6TQ99   | Solute carrier organic anion transporter family member ZB1 (Fragment) OS=Mus musculus GN=Sico2b1 PE=4 SV=1 - [F6TQ99_MOUSE] | 8.87  | 3  | 2  | 2  | 3   | 1.136 | 0.460 | 1.004 | 0.768 | 7.46    | 8.87  | 3   | 3   | 203  | 22.1  | 7.09  |
| Q5XF6    | Ribosomal protein OS=Mus musculus GN=Rpl10a PE=2 SV=1 - [Q5XF6_MOUSE]                                                       | 41.94 | 4  | 10 | 10 | 58  | 0.386 | 0.481 | 0.694 | 0.768 | 205.06  | 41.94 | 16  | 58  | 217  | 24.8  | 9.94  |
| Q9J143-2 | Isoform 2 of RNA binding protein fox-1 homolog 1 OS=Mus musculus GN=Rbfox1 -                                                | 30.32 | 7  | 3  | 9  | 33  | 1.204 | 0.852 | 1.184 | 0.769 | 86.80   | 30.32 | 15  | 33  | 376  | 40.5  | 7.33  |
| Q6P542   | ATP-binding cassette sub-family F member 1 OS=Mus musculus GN=Abcf1 PE=1 SV=1 - [ABCF1_MOUSE]                               | 18.28 | 2  | 12 | 13 | 36  | 0.723 | 0.622 | 0.795 | 0.769 | 99.49   | 18.28 | 21  | 36  | 837  | 94.9  | 6.51  |
| P17095   | High mobility group protein HMG-I/HMG-Y OS=Mus musculus GN=Hmga1 PE=1 SV=4 - [HMGAI_MOUSE]                                  | 38.32 | 1  | 2  | 5  | 31  | 0.483 | 0.819 | 0.977 | 0.769 | 85.54   | 38.32 | 9   | 31  | 107  | 11.6  | 10.32 |
| J3QN27   | Calcium-activated potassium channel subunit alpha-1 OS=Mus musculus GN=Kcnma1 PE=4 SV=1 - [J3QN27_MOUSE]                    | 13.69 | 11 | 2  | 12 | 66  | 0.728 | 0.799 | 1.592 | 0.769 | 201.71  | 13.69 | 22  | 66  | 1132 | 127.1 | 6.62  |
| P97783   | Protein AF1q OS=Mus musculus GN=Milt11 PE=2 SV=1 - [AF1Q_MOUSE]                                                             | 42.22 | 1  | 3  | 3  | 4   | 2.130 | 1.211 | 0.957 | 0.769 | 11.11   | 42.22 | 4   | 4   | 90   | 10.0  | 4.41  |
| Q64191   | N(4)-(beta-N-acetylglucosaminy)-L-asparaginase OS=Mus musculus GN=Aga PE=2 SV=1 - [ASPG_MOUSE]                              | 10.12 | 1  | 3  | 3  | 17  | 1.939 | 0.729 | 0.586 | 0.769 | 46.32   | 10.12 | 6   | 17  | 346  | 37.0  | 6.44  |
| Q5SVRS   | E3 ubiquitin-protein ligase RNF130 OS=Mus musculus GN=Rnf130 PE=2 SV=1 - [Q5SVRS_MOUSE]                                     | 4.17  | 2  | 1  | 1  | 2   | 1.469 | 0.786 | 0.987 | 0.770 | 6.95    | 4.17  | 2   | 2   | 384  | 42.4  | 9.19  |
| Q9D850   | Transmembrane protein 68 OS=Mus musculus GN=Tmem68 PE=2 SV=1 - [TMM68_MOUSE]                                                | 3.65  | 1  | 1  | 1  | 2   | 1.279 | 1.237 | 1.094 | 0.770 | 4.51    | 3.65  | 2   | 2   | 329  | 37.8  | 8.46  |
| E9Q3G8   | Protein Nup153 OS=Mus musculus GN=Nup153 PE=2 SV=1 - [E9Q3G8_MOUSE]                                                         | 17.31 | 1  | 19 | 19 | 49  | 1.081 | 0.801 | 1.060 | 0.770 | 127.13  | 17.31 | 30  | 49  | 1462 | 151.9 | 8.84  |
| Q9CQN7   | 39S ribosomal protein L41, mitochondrial OS=Mus musculus GN=Mrip41 PE=2 SV=1 - [RM41_MOUSE]                                 | 45.19 | 2  | 6  | 6  | 18  | 1.248 | 0.635 | 1.103 | 0.770 | 56.20   | 45.19 | 10  | 18  | 135  | 15.3  | 9.82  |

|          |                                                                                                                                  |       |   |    |    |     |        |       |       |       |        |       |    |     |      |       |       |
|----------|----------------------------------------------------------------------------------------------------------------------------------|-------|---|----|----|-----|--------|-------|-------|-------|--------|-------|----|-----|------|-------|-------|
| Q9WU01   | KH domain-containing, RNA-binding, signal transduction-associated protein 2 OS=Mus musculus GN=Khdrbs2 PE=1 SV=1 - [KHDR2_MOUSE] | 29.23 | 3 | 8  | 13 | 46  | 0.959  | 0.771 | 0.819 | 0.770 | 117.07 | 29.23 | 24 | 46  | 349  | 38.8  | 6.48  |
| Q9D394   | Protein RUFY3 OS=Mus musculus GN=Rufy3 PE=1 SV=1 - [RUFY3_MOUSE]                                                                 | 57.78 | 2 | 1  | 26 | 239 | 1.055  | 1.075 | 0.703 | 0.770 | 654.62 | 57.78 | 48 | 239 | 469  | 53.0  | 5.49  |
| E9Q728   | Protein Ythdc1 OS=Mus musculus GN=Ythdc1 PE=2 SV=1 - [E9Q728_MOUSE]                                                              | 8.73  | 4 | 5  | 6  | 18  | 0.583  | 0.730 | 1.011 | 0.770 | 40.94  | 8.73  | 10 | 18  | 710  | 82.7  | 5.91  |
| E9Q6K1   | TFIIH basal transcription factor complex helicase XPD subunit OS=Mus musculus GN=Ercc2 PE=2 SV=1 - [E9Q6K1_MOUSE]                | 8.80  | 3 | 1  | 4  | 7   | 0.481  | 0.762 | 0.773 | 0.770 | 13.96  | 8.80  | 5  | 7   | 739  | 84.4  | 6.92  |
| Q8CI96-3 | Isoform 3 of CAP-Gly domain-containing linker protein 4 OS=Mus musculus GN=Clip4 - [CLIP4_MOUSE]                                 | 13.24 | 1 | 1  | 3  | 5   | 1.122  | 0.813 | 1.114 | 0.770 | 9.65   | 13.24 | 5  | 5   | 219  | 24.0  | 4.96  |
| G3UXK7   | Cytochrome c-type heme lyase OS=Mus musculus GN=Hcsc PE=2 SV=1 - [G3UXK7_MOUSE]                                                  | 45.16 | 1 | 1  | 3  | 11  | 3.803  | 1.722 | 0.952 | 0.770 | 40.71  | 45.16 | 4  | 11  | 93   | 9.5   | 6.27  |
| J3QP80   | MCG15559 OS=Mus musculus GN=Gm5814 PE=4 SV=1 - [J3QP80_MOUSE]                                                                    | 32.80 | 2 | 3  | 3  | 11  | 1.833  | 0.987 | 0.943 | 0.770 | 41.84  | 32.80 | 6  | 11  | 125  | 14.2  | 4.86  |
| B9EJX2   | Nance-Horan syndrome (Human) OS=Mus musculus GN=Nhs PE=2 SV=1 - [B9EJX2_MOUSE]                                                   | 9.78  | 2 | 8  | 8  | 11  | 1.350  | 1.113 | 0.852 | 0.771 | 30.43  | 9.78  | 10 | 11  | 1626 | 176.5 | 6.93  |
| Q9R194   | Cryptochrome-2 OS=Mus musculus GN=Cry2 PE=1 SV=1 - [CRY2_MOUSE]                                                                  | 11.49 | 1 | 4  | 5  | 9   | 1.230  | 0.836 | 0.787 | 0.771 | 24.53  | 11.49 | 8  | 9   | 592  | 66.8  | 8.35  |
| B2RU80   | Receptor-type tyrosine-protein phosphatase beta OS=Mus musculus GN=Ptpnb PE=1 SV=1 - [PTPRB_MOUSE]                               | 0.65  | 1 | 1  | 2  | 3   | 2.412  | 0.702 | 0.989 | 0.771 | 7.99   | 0.65  | 2  | 3   | 1998 | 224.4 | 7.18  |
| O35450   | FK506-binding protein-like OS=Mus musculus GN=Fkbp1 PE=2 SV=1 - [FKBP1_MOUSE]                                                    | 11.53 | 1 | 3  | 3  | 6   | 0.898  | 1.215 | 1.136 | 0.771 | 22.11  | 11.53 | 6  | 6   | 347  | 38.3  | 7.74  |
| P27545   | Ceramide synthase 1 OS=Mus musculus GN=Cers1 PE=1 SV=1 - [CERS1_MOUSE]                                                           | 11.71 | 1 | 3  | 3  | 12  | 0.652  | 0.908 | 0.868 | 0.771 | 32.53  | 11.71 | 5  | 12  | 350  | 40.1  | 8.38  |
| Q91YW3   | DnaJ homolog subfamily C member 3 OS=Mus musculus GN=Dnajc3 PE=1 SV=1 - [Dnajc3_MOUSE]                                           | 18.06 | 1 | 9  | 10 | 26  | 1.101  | 0.789 | 0.773 | 0.771 | 58.18  | 18.06 | 16 | 26  | 504  | 57.4  | 5.85  |
| Q921C5   | Protein bicaudal D homolog 2 OS=Mus musculus GN=Bicd2 PE=1 SV=1 - [BICD2_MOUSE]                                                  | 30.85 | 5 | 19 | 23 | 65  | 1.974  | 0.852 | 0.938 | 0.771 | 174.18 | 30.85 | 37 | 65  | 820  | 93.3  | 5.44  |
| Q3UM18-2 | Isoform 2 of Large subunit GTPase 1 homolog OS=Mus musculus GN=Lsg1 - [LSG1_MOUSE]                                               | 4.55  | 2 | 2  | 2  | 7   | 2.114  | 1.018 | 0.809 | 0.771 | 10.13  | 4.55  | 4  | 7   | 615  | 69.4  | 6.58  |
| Q7M732   | Retrotransposon-like protein 1 OS=Mus musculus GN=Rtl1 PE=2 SV=1 - [RTL1_MOUSE]                                                  | 5.05  | 1 | 1  | 1  | 4   | 3.147  | 0.636 | 0.439 | 0.771 | 12.62  | 5.05  | 2  | 4   | 1744 | 198.9 | 4.26  |
| Q6GQT9   | Nodal modulator 1 OS=Mus musculus GN=Nomo1 PE=1 SV=1 - [NOMO1_MOUSE]                                                             | 34.93 | 1 | 31 | 31 | 105 | 1.086  | 0.732 | 0.791 | 0.771 | 363.90 | 34.93 | 54 | 105 | 1214 | 133.3 | 6.09  |
| Q9D0F3   | Protein ERGIC-53 OS=Mus musculus GN=Lman1 PE=2 SV=1 - [LMAN1_MOUSE]                                                              | 28.63 | 2 | 14 | 15 | 48  | 0.668  | 0.965 | 0.651 | 0.771 | 127.54 | 28.63 | 24 | 48  | 517  | 57.8  | 6.34  |
| Q9ER12   | Ras-related protein Rab-27A OS=Mus musculus GN=Rab27a PE=1 SV=1 - [RB27A_MOUSE]                                                  | 20.81 | 1 | 3  | 4  | 9   | 0.899  | 1.490 | 0.724 | 0.771 | 24.09  | 20.81 | 7  | 9   | 221  | 25.0  | 5.36  |
| Q6NXY1   | WD repeat-containing protein 67 OS=Mus musculus GN=Wdr67 PE=2 SV=1 - [Wdr67_MOUSE]                                               | 2.11  | 3 | 2  | 2  | 2   | 36.551 | 4.119 | 3.770 | 0.772 | 0.00   | 2.11  | 2  | 2   | 996  | 115.8 | 8.12  |
| Q6R0H7-3 | Isoform XLas-3 of Guanine nucleotide-binding protein G(s) subunit alpha isoforms XLas OS=Mus musculus GN=Gnas - [GNAS1_MOUSE]    | 9.55  | 2 | 1  | 6  | 20  | 1.408  | 0.586 | 0.708 | 0.772 | 64.34  | 9.55  | 9  | 20  | 827  | 85.9  | 4.72  |
| Q3UNV4   | Cytochrome P450, family 2, subfamily J, polypeptide 13, isoform CRA_a OS=Mus musculus GN=Cyp2j13 PE=2 SV=1 - [Q3UNV4_MOUSE]      | 9.34  | 5 | 1  | 4  | 6   | 11.021 | 0.858 | 2.357 | 0.772 | 17.51  | 9.34  | 5  | 6   | 503  | 57.5  | 8.44  |
| Q8K117   | WAS/WASL-interacting protein family member 1 OS=Mus musculus GN=Wipf1 PE=1 SV=1 - [WIPF1_MOUSE]                                  | 21.30 | 2 | 8  | 8  | 26  | 2.316  | 0.727 | 1.002 | 0.772 | 78.90  | 21.30 | 14 | 26  | 493  | 50.0  | 11.41 |
| Q8BHA1   | Leucine-rich repeat-containing protein 24 OS=Mus musculus GN=Lrrc24 PE=2 SV=1 - [LRC24_MOUSE]                                    | 3.84  | 1 | 2  | 2  | 5   | 0.664  | 0.556 | 0.747 | 0.772 | 14.18  | 3.84  | 3  | 5   | 521  | 56.3  | 8.21  |

|        |                                                                                                            |       |   |    |    |     |       |       |       |       |         |       |     |     |      |       |       |
|--------|------------------------------------------------------------------------------------------------------------|-------|---|----|----|-----|-------|-------|-------|-------|---------|-------|-----|-----|------|-------|-------|
| Q8BXG3 | Intraflagellar transport protein 57 homolog OS=Mus musculus GN=Irf57 PE=1 SV=1 - [IFT57_MOUSE]             | 8.62  | 3 | 3  | 3  | 7   | 1.162 | 1.495 | 0.885 | 0.772 | 10.37   | 8.62  | 5   | 7   | 429  | 48.7  | 4.98  |
| P62915 | Transcription initiation factor IIB OS=Mus musculus GN=Gtf2b PE=1 SV=1 - [TF2B_MOUSE]                      | 22.78 | 1 | 7  | 7  | 15  | 1.317 | 0.922 | 0.848 | 0.773 | 48.29   | 22.78 | 12  | 15  | 316  | 34.8  | 8.35  |
| G5E8C4 | MCG142017, isoform CRA_a OS=Mus musculus GN=Tmtc3 PE=4 SV=1 - [G5E8C4_MOUSE]                               | 10.33 | 3 | 7  | 9  | 25  | 0.753 | 0.837 | 0.753 | 0.773 | 53.23   | 10.33 | 14  | 25  | 920  | 104.1 | 8.53  |
| P62281 | 40S ribosomal protein S11 OS=Mus musculus GN=Rps11 PE=2 SV=3 - [RS11_MOUSE]                                | 49.37 | 1 | 11 | 11 | 48  | 0.479 | 0.432 | 0.698 | 0.773 | 128.40  | 49.37 | 20  | 48  | 158  | 18.4  | 10.30 |
| Q91V04 | Translocating chain-associated membrane protein 1 OS=Mus musculus GN=Tram1 PE=1 SV=3 - [TRAM1_MOUSE]       | 8.02  | 1 | 3  | 3  | 5   | 1.003 | 1.176 | 0.645 | 0.773 | 14.22   | 8.02  | 5   | 5   | 374  | 43.0  | 9.69  |
| I7HLV2 | 60S ribosomal protein L10 (Fragment) OS=Mus musculus GN=Rpl10 PE=4 SV=1 - [I7HLV2_MOUSE]                   | 50.75 | 4 | 10 | 10 | 69  | 0.449 | 0.587 | 0.676 | 0.773 | 219.84  | 50.75 | 16  | 69  | 201  | 23.1  | 10.01 |
| Q8K4R4 | Cytoplasmic phosphatidylinositol transfer protein 1 OS=Mus musculus GN=Fitpnc1 PE=1 SV=1 - [FITPNC1_MOUSE] | 41.57 | 3 | 4  | 13 | 39  | 0.474 | 0.569 | 0.681 | 0.773 | 92.40   | 41.57 | 21  | 39  | 332  | 38.4  | 6.32  |
| E9QNR5 | Thrombospondin type-1 domain-containing protein 7A OS=Mus musculus GN=Thsd7a PE=2 SV=1 - [E9QNR5_MOUSE]    | 15.02 | 6 | 19 | 19 | 57  | 0.765 | 0.844 | 1.074 | 0.773 | 151.74  | 15.02 | 31  | 57  | 1644 | 183.3 | 7.20  |
| Q91VJ5 | Polyglutamine-binding protein 1 OS=Mus musculus GN=Pqbp1 PE=2 SV=1 - [PQBP1_MOUSE]                         | 15.97 | 2 | 3  | 3  | 9   | 0.912 | 0.415 | 1.068 | 0.773 | 25.01   | 15.97 | 5   | 9   | 263  | 30.6  | 6.23  |
| F8VQ95 | Transforming acidic coiled-coil-containing protein 1 OS=Mus musculus GN=Tacc1 PE=2 SV=1 - [F8VQ95_MOUSE]   | 34.15 | 3 | 19 | 23 | 84  | 1.365 | 0.824 | 1.179 | 0.773 | 225.05  | 34.15 | 39  | 84  | 776  | 84.2  | 5.03  |
| B2RUG9 | Adenomatous polyposis coli OS=Mus musculus GN=Apc PE=2 SV=1 - [B2RUG9_MOUSE]                               | 28.85 | 8 | 59 | 63 | 176 | 0.955 | 0.646 | 1.204 | 0.773 | 513.51  | 28.85 | 104 | 176 | 2842 | 310.7 | 7.58  |
| Q78JW9 | Ubiquitin domain-containing protein UBF1 OS=Mus musculus GN=Ubf1 PE=1 SV=2 - [UBF1_MOUSE]                  | 25.82 | 1 | 9  | 9  | 49  | 1.678 | 0.769 | 0.771 | 0.773 | 139.75  | 25.82 | 15  | 49  | 368  | 40.1  | 8.85  |
| Q9CQH7 | Transcription factor BTF3 homolog 4 OS=Mus musculus GN=Btf3h4 PE=2 SV=1 - [BT3L4_MOUSE]                    | 34.81 | 1 | 6  | 8  | 25  | 1.116 | 0.778 | 1.083 | 0.773 | 55.39   | 34.81 | 11  | 25  | 158  | 17.3  | 6.35  |
| Q9CQS8 | Protein transport protein Sec61 subunit beta OS=Mus musculus GN=Sec61b PE=1 SV=3 - [SC61B_MOUSE]           | 11.46 | 2 | 1  | 1  | 11  | 0.685 | 0.703 | 0.705 | 0.774 | 28.68   | 11.46 | 2   | 11  | 96   | 10.0  | 11.56 |
| Q3UNH4 | G protein-regulated inducer of neurite outgrowth 1 OS=Mus musculus GN=Gprin1 PE=1 SV=2 - [GPRIN1_MOUSE]    | 64.91 | 1 | 57 | 57 | 392 | 0.922 | 1.867 | 1.398 | 0.774 | 1068.53 | 64.91 | 102 | 392 | 932  | 95.4  | 7.93  |
| Q91YD3 | mRNA-decapping enzyme 1A OS=Mus musculus GN=Dcp1a PE=1 SV=1 - [DCP1A_MOUSE]                                | 17.94 | 1 | 9  | 9  | 22  | 1.266 | 1.296 | 0.872 | 0.774 | 66.36   | 17.94 | 16  | 22  | 602  | 65.2  | 6.99  |
| F2Z470 | 3-hydroxy-3-methylglutaryl coenzyme A reductase OS=Mus musculus GN=Hmgcr PE=2 SV=1 - [F2Z470_MOUSE]        | 3.05  | 2 | 2  | 2  | 5   | 1.277 | 0.487 | 0.611 | 0.774 | 10.10   | 3.05  | 3   | 5   | 819  | 89.8  | 6.06  |
| P24638 | Lysosomal acid phosphatase OS=Mus musculus GN=Acp2 PE=2 SV=2 - [PPAL_MOUSE]                                | 7.57  | 3 | 3  | 3  | 9   | 0.998 | 0.887 | 0.635 | 0.774 | 24.40   | 7.57  | 6   | 9   | 423  | 48.5  | 7.02  |
| P09055 | Integrin beta-1 OS=Mus musculus GN=Itgb1 PE=1 SV=1 - [ITB1_MOUSE]                                          | 24.06 | 1 | 17 | 17 | 66  | 0.745 | 1.272 | 0.605 | 0.774 | 218.04  | 24.06 | 30  | 66  | 798  | 88.2  | 5.94  |
| J3QNY1 | Uncharacterized protein OS=Mus musculus GN=Gm9242 PE=4 SV=1 - [J3QNY1_MOUSE]                               | 45.38 | 7 | 13 | 15 | 244 | 1.099 | 0.683 | 1.112 | 0.774 | 797.43  | 45.38 | 28  | 244 | 357  | 37.1  | 8.31  |
| Q9CPP0 | Nucleoplasmin-3 OS=Mus musculus GN=Npm3 PE=2 SV=3 - [NPM3_MOUSE]                                           | 8.57  | 1 | 1  | 1  | 3   | 2.175 | 0.988 | 0.942 | 0.774 | 5.76    | 8.57  | 2   | 3   | 175  | 19.0  | 4.82  |
| P63168 | Dynein light chain 1, cytoplasmic OS=Mus musculus GN=Dynll1 PE=1 SV=1 - [DYL1_MOUSE]                       | 61.80 | 2 | 3  | 5  | 72  | 1.136 | 1.193 | 1.015 | 0.774 | 287.01  | 61.80 | 8   | 72  | 89   | 10.4  | 7.40  |
| Q9J1W9 | Ras-related protein Ral-B OS=Mus musculus GN=Ralb PE=2 SV=1 - [RALB_MOUSE]                                 | 52.91 | 2 | 3  | 8  | 27  | 1.106 | 0.960 | 0.801 | 0.774 | 66.40   | 52.91 | 10  | 27  | 206  | 23.3  | 6.62  |
| Q8K0Z5 | Tropomyosin 3, gamma OS=Mus musculus GN=Tpm3 PE=2 SV=1 - [Q8K0Z5_MOUSE]                                    | 37.32 | 3 | 5  | 15 | 264 | 1.676 | 1.181 | 1.531 | 0.774 | 678.01  | 37.32 | 27  | 264 | 284  | 33.1  | 4.77  |

|          |                                                                                                                     |       |    |    |    |     |       |       |       |       |        |       |    |     |      |       |      |
|----------|---------------------------------------------------------------------------------------------------------------------|-------|----|----|----|-----|-------|-------|-------|-------|--------|-------|----|-----|------|-------|------|
| Q6NZF1   | Zinc finger CCH domain-containing protein 11A<br>OS=Mus musculus<br>GN=Zc3h11a PE=1 SV=1 - [ZC11A_MOUSE]            | 26.89 | 1  | 16 | 16 | 41  | 1.012 | 0.624 | 1.008 | 0.774 | 104.24 | 26.89 | 26 | 41  | 792  | 86.4  | 8.13 |
| P60867   | 40S ribosomal protein S20<br>OS=Mus musculus<br>GN=Rps20 PE=1 SV=1 - [RS20_MOUSE]                                   | 41.18 | 2  | 5  | 6  | 35  | 0.601 | 0.510 | 0.731 | 0.774 | 81.43  | 41.18 | 11 | 35  | 119  | 13.4  | 9.94 |
| B9E1A2-5 | Isoform 5 of Cortactin-binding protein 2 OS=Mus musculus GN=Cttnbp2 - [CTTB2_MOUSE]                                 | 20.22 | 7  | 3  | 29 | 145 | 0.846 | 0.870 | 1.129 | 0.774 | 440.26 | 20.22 | 49 | 145 | 1607 | 175.1 | 8.29 |
| Q9JL35   | High mobility group nucleosome-binding domain-containing protein 5 OS=Mus musculus GN=Hmgn5 PE=1 SV=2 - [LUM_MOUSE] | 5.67  | 1  | 2  | 2  | 3   | 0.904 | 0.720 | 0.863 | 0.775 | 5.10   | 5.67  | 3  | 3   | 406  | 45.3  | 4.37 |
| P51885   | Lumican OS=Mus musculus GN=Lum PE=1 SV=2 - [LUM_MOUSE]                                                              | 12.13 | 1  | 4  | 4  | 10  | 1.764 | 1.485 | 0.619 | 0.775 | 21.83  | 12.13 | 6  | 10  | 338  | 38.2  | 6.43 |
| Q5NCR9   | Nuclear speckle splicing regulatory protein 1 OS=Mus musculus GN=Nsrp1 PE=1 SV=1 - [NSRP1_MOUSE]                    | 7.38  | 1  | 3  | 3  | 8   | 0.782 | 0.706 | 1.079 | 0.775 | 13.95  | 7.38  | 6  | 8   | 542  | 63.8  | 8.76 |
| P97855   | Ras GTPase-activating protein-binding protein 1 OS=Mus musculus GN=G3bp1 PE=1 SV=1 - [G3BP1_MOUSE]                  | 33.98 | 1  | 11 | 12 | 45  | 1.147 | 0.750 | 0.814 | 0.775 | 154.66 | 33.98 | 19 | 45  | 465  | 51.8  | 5.59 |
| P62889   | 60S ribosomal protein L30 OS=Mus musculus GN=Rpl30 PE=2 SV=2 - [RL30_MOUSE]                                         | 36.52 | 1  | 5  | 5  | 20  | 0.640 | 0.594 | 0.672 | 0.775 | 56.71  | 36.52 | 8  | 20  | 115  | 12.8  | 9.63 |
| P62774   | Myotrophin OS=Mus musculus GN=Mtpn PE=1 SV=2 - [MTPN_MOUSE]                                                         | 52.54 | 1  | 5  | 5  | 63  | 1.438 | 1.429 | 1.291 | 0.775 | 159.72 | 52.54 | 9  | 63  | 118  | 12.9  | 5.52 |
| D3Z0V7   | TSC22 domain family protein 1 OS=Mus musculus GN=Tsc22d1 PE=2 SV=1 - [TSC22_MOUSE]                                  | 11.56 | 4  | 1  | 10 | 64  | 1.548 | 0.860 | 1.421 | 0.775 | 142.18 | 11.56 | 19 | 64  | 995  | 102.0 | 5.77 |
| Q8BXN9   | Transmembrane protein 87A OS=Mus musculus GN=Tmem87a PE=1 SV=1 - [TM87A_MOUSE]                                      | 15.14 | 6  | 8  | 8  | 27  | 0.855 | 1.056 | 0.797 | 0.775 | 71.50  | 15.14 | 14 | 27  | 555  | 63.3  | 6.67 |
| Q4VA53-3 | Isoform 3 of Sister chromatid cohesion protein PDS5 homolog B OS=Mus musculus GN=Pds5b - [PDS5B_MOUSE]              | 10.57 | 4  | 12 | 15 | 34  | 0.549 | 0.724 | 0.786 | 0.775 | 77.72  | 10.57 | 22 | 34  | 1448 | 164.6 | 8.54 |
| Q8B0A2   | Solute carrier family 41 member 1 OS=Mus musculus GN=Slc41a1 PE=2 SV=1 - [SLC41_MOUSE]                              | 4.30  | 1  | 1  | 1  | 1   | 1.675 | 1.265 | 0.650 | 0.775 | 5.40   | 4.30  | 1  | 1   | 512  | 54.9  | 5.31 |
| B2RQG2   | PHD finger protein 3 OS=Mus musculus GN=Phf3 PE=2 SV=1 - [B2RQG2_MOUSE]                                             | 4.79  | 1  | 8  | 8  | 21  | 0.679 | 0.766 | 0.975 | 0.775 | 51.07  | 4.79  | 14 | 21  | 2025 | 225.4 | 6.70 |
| Q62347   | Cyclic AMP-responsive element-binding protein 1 OS=Mus musculus GN=Creb1 PE=2 SV=1 - [Q62347_MOUSE]                 | 25.09 | 36 | 7  | 7  | 18  | 1.334 | 0.860 | 1.123 | 0.775 | 58.03  | 25.09 | 10 | 18  | 287  | 30.9  | 6.37 |
| Q9Z212   | Peptidyl-prolyl cis-trans isomerase FKBP1B OS=Mus musculus GN=Fkbp1b PE=1 SV=3 - [FKBP1_MOUSE]                      | 19.44 | 1  | 1  | 2  | 28  | 2.246 | 0.799 | 1.572 | 0.776 | 97.45  | 19.44 | 3  | 28  | 108  | 11.8  | 8.47 |
| Q99LD9   | Translation initiation factor eIF-2B subunit beta OS=Mus musculus GN=EIF2b2 PE=2 SV=1 - [EIF2B_MOUSE]               | 23.93 | 3  | 7  | 7  | 13  | 1.760 | 1.311 | 0.793 | 0.776 | 33.39  | 23.93 | 10 | 13  | 351  | 38.9  | 6.24 |
| O89016   | ATP-binding cassette sub-family D member 4 OS=Mus musculus GN=Abcd4 PE=2 SV=2 - [ABCD4_MOUSE]                       | 9.08  | 1  | 4  | 4  | 6   | 2.250 | 1.071 | 0.792 | 0.776 | 16.30  | 9.08  | 5  | 6   | 606  | 68.5  | 6.42 |
| Q9CY14   | Putative RNA-binding protein Luc7-like 1 OS=Mus musculus GN=Luc7l1 PE=2 SV=2 - [LUC7_MOUSE]                         | 15.36 | 6  | 2  | 6  | 27  | 0.732 | 1.021 | 0.810 | 0.776 | 73.46  | 15.36 | 10 | 27  | 371  | 43.9  | 9.88 |
| Q8BH60   | Golgi-associated PDZ and coiled-coil motif-containing protein OS=Mus musculus GN=Gopc PE=1 SV=1 - [GOPC_MOUSE]      | 39.09 | 3  | 15 | 15 | 43  | 1.217 | 0.900 | 1.032 | 0.776 | 116.29 | 39.09 | 24 | 43  | 463  | 50.6  | 6.25 |
| F7BGR7   | RNA-binding protein 4 OS=Mus musculus GN=Rbm4 PE=4 SV=1 - [F7BGR7_MOUSE]                                            | 29.35 | 10 | 1  | 12 | 42  | 1.490 | 1.120 | 1.333 | 0.776 | 133.97 | 29.35 | 21 | 42  | 477  | 52.8  | 7.30 |
| O35126   | Atrophin-1 OS=Mus musculus GN=Atn1 PE=1 SV=1 - [ATN1_MOUSE]                                                         | 11.32 | 2  | 5  | 6  | 11  | 1.352 | 0.637 | 1.186 | 0.776 | 32.44  | 11.32 | 10 | 11  | 1175 | 123.6 | 8.95 |
| Q76HL1   | Protein Prss43 OS=Mus musculus GN=Prss43 PE=2 SV=1 - [Q76HL1_MOUSE]                                                 | 7.33  | 1  | 2  | 2  | 2   | 0.883 | 0.958 | 0.946 | 0.776 | 5.63   | 7.33  | 2  | 2   | 382  | 42.2  | 5.80 |
| Q9J1H2   | Nuclear pore complex protein Nup50 OS=Mus musculus GN=Nup50 PE=1 SV=3 - [NUP50_MOUSE]                               | 21.67 | 1  | 8  | 8  | 19  | 1.217 | 0.681 | 0.917 | 0.776 | 54.52  | 21.67 | 14 | 19  | 466  | 49.5  | 6.24 |



|          |                                                                                                             |       |   |    |    |     |       |       |       |       |         |       |     |     |      |       |      |
|----------|-------------------------------------------------------------------------------------------------------------|-------|---|----|----|-----|-------|-------|-------|-------|---------|-------|-----|-----|------|-------|------|
| A2AQ19   | RNA polymerase-associated protein RTF1 homolog OS=Mus musculus GN=Rtf1 PE=2 SV=1 - [RTF1_MOUSE]             | 19.58 | 1 | 14 | 14 | 26  | 0.995 | 0.864 | 0.969 | 0.776 | 58.92   | 19.58 | 21  | 26  | 715  | 80.7  | 8.16 |
| Q62422   | Osteoclast-stimulating factor 1 OS=Mus musculus GN=Ostf1 PE=1 SV=2 - [OSTF1_MOUSE]                          | 27.44 | 1 | 5  | 5  | 14  | 1.764 | 0.831 | 0.906 | 0.776 | 37.35   | 27.44 | 8   | 14  | 215  | 23.8  | 5.68 |
| O09131   | Glutathione S-transferase omega-1 OS=Mus musculus GN=Gsto1 PE=2 SV=2 - [GSTO1_MOUSE]                        | 50.00 | 3 | 12 | 12 | 57  | 1.376 | 0.741 | 0.583 | 0.776 | 142.30  | 50.00 | 22  | 57  | 240  | 27.5  | 7.36 |
| Q55UT0   | RNA-binding protein EWS OS=Mus musculus GN=Ewsr1 PE=2 SV=1 - [Q55UT0_MOUSE]                                 | 11.81 | 4 | 7  | 7  | 82  | 1.425 | 0.936 | 1.168 | 0.776 | 282.68  | 11.81 | 13  | 82  | 618  | 64.9  | 9.38 |
| Q3TRR0-2 | Isoform 2 of Microtubule-associated protein 9 OS=Mus musculus GN=Map9 -                                     | 17.05 | 3 | 7  | 8  | 13  | 0.924 | 0.976 | 1.408 | 0.776 | 27.35   | 17.05 | 10  | 13  | 616  | 69.6  | 7.59 |
| A2AL85   | Aspartyl/asparaginyl beta-hydroxylase OS=Mus musculus GN=Asph PE=2 SV=1 - [A2AL85_MOUSE]                    | 17.10 | 9 | 8  | 9  | 14  | 1.000 | 1.069 | 0.827 | 0.776 | 34.08   | 17.10 | 13  | 14  | 725  | 81.4  | 5.11 |
| Q9CQT2   | RNA-binding protein 7 OS=Mus musculus GN=Rbm7 PE=1 SV=1 - [RBM7_MOUSE]                                      | 12.45 | 1 | 3  | 3  | 12  | 1.321 | 0.891 | 1.039 | 0.776 | 32.19   | 12.45 | 5   | 12  | 265  | 30.1  | 9.38 |
| Q8R1V4   | Transmembrane emp24 domain-containing protein 4 OS=Mus musculus GN=Tmed4 PE=2 SV=1 - [TMED4_MOUSE]          | 27.31 | 2 | 4  | 5  | 24  | 0.849 | 0.925 | 0.685 | 0.777 | 62.04   | 27.31 | 8   | 24  | 227  | 26.0  | 8.18 |
| Q80UW0-2 | Isoform 2 of Heparan-sulfate 6-O-sulfotransferase 2 OS=Mus musculus GN=H6st2 - [H6ST2_MOUSE]                | 6.22  | 3 | 2  | 2  | 4   | 1.666 | 0.842 | 0.913 | 0.777 | 1.99    | 6.22  | 2   | 4   | 466  | 53.7  | 8.98 |
| Q8C7K6   | Prenylcysteine oxidase-like OS=Mus musculus GN=Pcyox11 PE=2 SV=1 - [PCYLX_MOUSE]                            | 17.58 | 1 | 10 | 10 | 19  | 1.140 | 0.849 | 0.796 | 0.777 | 65.10   | 17.58 | 14  | 19  | 495  | 54.8  | 7.65 |
| Q61739   | Integrin alpha-6 OS=Mus musculus GN=Itga6 PE=1 SV=3 - [ITA6_MOUSE]                                          | 20.07 | 3 | 18 | 18 | 40  | 0.938 | 0.729 | 0.739 | 0.777 | 110.55  | 20.07 | 31  | 40  | 1091 | 122.1 | 7.03 |
| Q69ZQ2   | Pre-mRNA-splicing factor ISY1 homolog OS=Mus musculus GN=Isy1 PE=1 SV=2 - [ISY1_MOUSE]                      | 25.96 | 1 | 6  | 7  | 16  | 1.324 | 0.972 | 1.004 | 0.777 | 41.44   | 25.96 | 9   | 16  | 285  | 33.0  | 5.17 |
| A2AW19   | Endophilin-B2 OS=Mus musculus GN=Sh3glb2 PE=4 SV=1 - [A2AW19_MOUSE]                                         | 51.07 | 2 | 2  | 19 | 117 | 1.833 | 1.217 | 1.074 | 0.777 | 338.51  | 51.07 | 33  | 117 | 374  | 41.8  | 5.97 |
| G3UW90   | Trichorhinophalangeal syndrome 1 (Human), isoform CRA_b OS=Mus musculus GN=Trps1 PE=4 SV=1 - [G3UW90_MOUSE] | 2.34  | 2 | 2  | 2  | 3   | 1.789 | 0.743 | 0.858 | 0.777 | 10.41   | 2.34  | 3   | 3   | 1281 | 140.9 | 7.64 |
| Q9QYY8   | Spastin OS=Mus musculus GN=Spast PE=2 SV=3 - [SPAST_MOUSE]                                                  | 42.67 | 1 | 19 | 19 | 52  | 0.962 | 0.661 | 0.804 | 0.777 | 148.48  | 42.67 | 29  | 52  | 614  | 66.4  | 9.69 |
| Q9R1P1   | Proteasome subunit beta type-3 OS=Mus musculus GN=Psb3 PE=1 SV=1 - [PSB3_MOUSE]                             | 41.46 | 3 | 7  | 7  | 28  | 1.553 | 0.952 | 0.736 | 0.778 | 96.82   | 41.46 | 12  | 28  | 205  | 22.9  | 6.55 |
| E9PWQ6   | Serine/threonine-protein kinase 31 OS=Mus musculus GN=Stk31 PE=2 SV=1 - [E9PWQ6_MOUSE]                      | 3.80  | 4 | 3  | 3  | 4   | 0.454 | 0.345 | 0.997 | 0.778 | 9.50    | 3.80  | 3   | 4   | 973  | 109.8 | 5.43 |
| Q8BH50-2 | Isoform 2 of Uncharacterized protein C18orf25 homolog OS=Mus musculus -                                     | 7.41  | 3 | 1  | 1  | 1   | 0.911 | 1.081 | 1.042 | 0.778 | 2.59    | 7.41  | 1   | 1   | 162  | 17.3  | 4.67 |
| B1AQX6   | SRC kinase-signaling inhibitor 1 OS=Mus musculus GN=Srcin1 PE=2 SV=1 - [B1AQX6_MOUSE]                       | 71.81 | 4 | 10 | 75 | 479 | 0.559 | 0.958 | 0.984 | 0.778 | 1495.43 | 71.81 | 139 | 479 | 1174 | 126.9 | 9.36 |
| Q9WVC3   | Caveolin-2 OS=Mus musculus GN=Cav2 PE=1 SV=1 - [CAV2_MOUSE]                                                 | 7.41  | 1 | 1  | 1  | 1   | 4.486 | 1.814 | 0.885 | 0.778 | 3.55    | 7.41  | 1   | 1   | 162  | 18.2  | 5.63 |
| Q9WUK2   | Eukaryotic translation initiation factor 4H OS=Mus musculus GN=EIF4h PE=1 SV=3 - [IF4H_MOUSE]               | 52.42 | 2 | 10 | 10 | 84  | 1.739 | 0.741 | 1.307 | 0.778 | 202.80  | 52.42 | 15  | 84  | 248  | 27.3  | 7.23 |
| Q8BGH7   | CDC42 small effector protein 2 OS=Mus musculus GN=Cdc42se2 PE=1 SV=1 -                                      | 22.62 | 1 | 1  | 1  | 5   | 0.712 | 0.780 | 1.097 | 0.778 | 20.59   | 22.62 | 2   | 5   | 84   | 9.2   | 8.35 |
| Q9CR10   | Oxidoreductase-like domain-containing protein 1 OS=Mus musculus GN=Oxid1 PE=2 SV=1 - [OXLD1_MOUSE]          | 7.46  | 1 | 1  | 1  | 8   | 1.689 | 0.980 | 1.278 | 0.779 | 25.76   | 7.46  | 2   | 8   | 201  | 22.2  | 8.05 |
| Q3V118   | Protein 4922505E12Rik OS=Mus musculus GN=4922505E12Rik PE=2 SV=1 - [Q3V118_MOUSE]                           | 2.74  | 1 | 1  | 1  | 1   | 0.817 | 0.791 | 0.943 | 0.779 | 0.00    | 2.74  | 1   | 1   | 621  | 71.3  | 9.60 |
| Q80UF4   | Serologically defined colon cancer antigen 8 homolog OS=Mus musculus GN=Scdca8 PE=1 SV=1 - [SDCG8_MOUSE]    | 5.58  | 4 | 3  | 4  | 13  | 1.573 | 0.670 | 1.233 | 0.779 | 29.54   | 5.58  | 6   | 13  | 717  | 82.9  | 6.52 |

|          |                                                                                                                                  |       |    |    |    |     |       |       |       |       |        |       |    |     |      |       |       |
|----------|----------------------------------------------------------------------------------------------------------------------------------|-------|----|----|----|-----|-------|-------|-------|-------|--------|-------|----|-----|------|-------|-------|
| P62311   | U6 snRNA-associated Sm-like protein Lsm3 OS=Mus musculus GN=Lsm3 PE=3 SV=2 - [LSM3_MOUSE]                                        | 11.76 | 1  | 1  | 1  | 8   | 2.126 | 0.869 | 1.025 | 0.779 | 30.11  | 11.76 | 2  | 8   | 102  | 11.8  | 4.70  |
| P61600   | N-alpha-acetyltransferase 20 OS=Mus musculus GN=Naa20 PE=2 SV=1 - [NAA20_MOUSE]                                                  | 19.66 | 6  | 3  | 3  | 8   | 0.756 | 1.191 | 0.643 | 0.779 | 25.52  | 19.66 | 6  | 8   | 178  | 20.4  | 5.03  |
| Q9CQU0   | Thioredoxin domain-containing protein 12 OS=Mus musculus GN=Txndc12 PE=2 SV=1 - [TXD12_MOUSE]                                    | 40.59 | 1  | 6  | 6  | 44  | 1.635 | 0.906 | 0.893 | 0.779 | 147.75 | 40.59 | 12 | 44  | 170  | 19.0  | 5.26  |
| Q8C4Y1   | Max protein OS=Mus musculus GN=Max PE=2 SV=1 - [Q8C4Y1_MOUSE]                                                                    | 10.60 | 3  | 2  | 2  | 5   | 1.283 | 0.826 | 0.876 | 0.779 | 14.39  | 10.60 | 3  | 5   | 151  | 17.2  | 6.55  |
| P50580   | Proliferation-associated protein 2G4 OS=Mus musculus GN=Pa2g4 PE=1 SV=3 - [PA2G4_MOUSE]                                          | 45.94 | 2  | 16 | 16 | 92  | 0.710 | 0.563 | 0.698 | 0.779 | 257.44 | 45.94 | 29 | 92  | 394  | 43.7  | 6.86  |
| Q06335   | Amyloid-like protein 2 OS=Mus musculus GN=Apip2 PE=1 SV=4 - [APLP2_MOUSE]                                                        | 32.96 | 2  | 2  | 21 | 65  | 0.683 | 0.705 | 0.898 | 0.779 | 191.81 | 32.96 | 36 | 65  | 707  | 80.4  | 4.70  |
| P10711   | Transcription elongation factor A protein 1 OS=Mus musculus GN=Tcea1 PE=1 SV=2 - [TCEA1_MOUSE]                                   | 39.87 | 6  | 12 | 12 | 72  | 1.510 | 0.739 | 1.057 | 0.779 | 209.15 | 39.87 | 23 | 72  | 301  | 33.9  | 8.38  |
| P57759   | Endoplasmic reticulum resident protein 29 OS=Mus musculus GN=Erp29 PE=1 SV=2 - [ERP29_MOUSE]                                     | 51.91 | 4  | 12 | 12 | 79  | 1.881 | 1.040 | 0.858 | 0.779 | 262.03 | 51.91 | 19 | 79  | 262  | 28.8  | 6.15  |
| Q3UGS4   | Protein FAM195B OS=Mus musculus GN=Fam195b PE=1 SV=1 - [F195B_MOUSE]                                                             | 64.95 | 1  | 7  | 7  | 21  | 1.376 | 0.799 | 1.150 | 0.780 | 56.09  | 64.95 | 12 | 21  | 97   | 11.1  | 9.14  |
| G3X937   | Solute carrier family 41 member 3 OS=Mus musculus GN=Slc41a3 PE=4 SV=1 -                                                         | 6.56  | 3  | 3  | 3  | 5   | 0.905 | 0.552 | 0.733 | 0.780 | 14.96  | 6.56  | 4  | 5   | 488  | 53.3  | 7.65  |
| Q8B105-2 | Isoform 2 of Zinc finger CCH domain-containing protein 14 OS=Mus musculus GN=Zc3h14 - [ZC3HE_MOUSE]                              | 32.30 | 3  | 13 | 14 | 47  | 1.387 | 0.847 | 1.112 | 0.780 | 138.76 | 32.30 | 25 | 47  | 579  | 64.9  | 8.15  |
| Q61103   | Zinc finger protein ubi-d4 OS=Mus musculus GN=Dpf2 PE=1 SV=1 - [REQU_MOUSE]                                                      | 14.58 | 3  | 4  | 4  | 8   | 0.683 | 0.840 | 0.862 | 0.781 | 27.25  | 14.58 | 7  | 8   | 391  | 44.2  | 6.47  |
| P49135   | TFIIH basal transcription factor complex helicase XFB subunit OS=Mus musculus GN=Erc3 PE=2 SV=1 - [ERCC3_MOUSE]                  | 9.45  | 1  | 5  | 5  | 8   | 1.016 | 0.906 | 0.743 | 0.781 | 32.26  | 9.45  | 6  | 8   | 783  | 89.1  | 7.18  |
| A6PWB3   | Protein C87977 (Fragment) OS=Mus musculus GN=C87977 PE=2 SV=1 -                                                                  | 14.81 | 15 | 2  | 2  | 3   | 2.302 | 2.699 | 1.443 | 0.781 | 8.15   | 14.81 | 2  | 3   | 189  | 21.4  | 4.79  |
| Q6PHZ8   | Kv channel-interacting protein 4 OS=Mus musculus GN=Kcnp4 PE=1 SV=1 -                                                            | 55.20 | 7  | 10 | 12 | 30  | 0.549 | 0.687 | 0.876 | 0.781 | 89.68  | 55.20 | 19 | 30  | 250  | 28.7  | 5.21  |
| B1AXI9   | 5-azacytidine induced gene 1 OS=Mus musculus GN=Azi1 PE=2 SV=1 - [B1AXI9_MOUSE]                                                  | 14.64 | 3  | 13 | 13 | 28  | 0.888 | 0.895 | 0.911 | 0.781 | 86.41  | 14.64 | 22 | 28  | 1059 | 120.2 | 8.65  |
| Q8C3X8   | Lipase maturation factor 2 OS=Mus musculus GN=Lmf2 PE=2 SV=1 - [LMF2_MOUSE]                                                      | 8.40  | 1  | 5  | 5  | 10  | 0.670 | 0.634 | 0.620 | 0.781 | 12.26  | 8.40  | 6  | 10  | 702  | 79.9  | 9.99  |
| E9Q1M6   | Protein Maskbp3 OS=Mus musculus GN=Ankhd1 PE=4 SV=1 - [E9Q1M6_MOUSE]                                                             | 8.21  | 7  | 7  | 16 | 36  | 1.006 | 0.809 | 1.064 | 0.781 | 93.99  | 8.21  | 28 | 36  | 2485 | 263.2 | 5.92  |
| P15864   | Histone H1.2 OS=Mus musculus GN=Hist1h1c PE=1 SV=2 - [H12_MOUSE]                                                                 | 49.53 | 3  | 9  | 18 | 114 | 0.415 | 1.226 | 0.883 | 0.781 | 304.94 | 49.53 | 32 | 114 | 212  | 21.3  | 11.00 |
| Q922H9-2 | Isoform 2 of Zinc finger protein 330 OS=Mus musculus GN=Znf330 - [ZN330_MOUSE]                                                   | 2.57  | 2  | 1  | 1  | 3   | 1.138 | 0.497 | 0.915 | 0.781 | 8.99   | 2.57  | 2  | 3   | 311  | 34.9  | 6.44  |
| O35678   | Monoglyceride lipase OS=Mus musculus GN=Mgll PE=1 SV=1 - [MGLL_MOUSE]                                                            | 42.90 | 5  | 11 | 11 | 42  | 0.611 | 0.863 | 1.078 | 0.781 | 122.32 | 42.90 | 20 | 42  | 303  | 33.4  | 7.15  |
| Q4LDD4-3 | Isoform 3 of Arf-GAP with Rho-GAP domain, ANK repeat and PH domain-containing protein 1 OS=Mus musculus GN=Arap1 - [ARAP1_MOUSE] | 3.77  | 5  | 4  | 5  | 7   | 1.446 | 1.085 | 0.765 | 0.781 | 17.01  | 3.77  | 7  | 7   | 1193 | 134.5 | 6.24  |
| P19253   | 60S ribosomal protein L13a OS=Mus musculus GN=Rpl13a PE=1 SV=4 - [RL13A_MOUSE]                                                   | 37.44 | 3  | 10 | 10 | 58  | 0.544 | 0.649 | 0.730 | 0.781 | 148.00 | 37.44 | 17 | 58  | 203  | 23.4  | 11.02 |
| Q61193   | Rai guanine nucleotide dissociation stimulator-like 2 OS=Mus musculus GN=Rgj2 PE=1 SV=2 - [RGL2_MOUSE]                           | 7.33  | 2  | 4  | 4  | 7   | 0.705 | 0.572 | 0.805 | 0.781 | 25.09  | 7.33  | 7  | 7   | 778  | 83.8  | 6.73  |
| F6V6T4   | Transmembrane emp24 domain-containing protein 2 (Fragment) OS=Mus musculus GN=Tmed2 PE=3 SV=1 - [F6V6T4_MOUSE]                   | 34.09 | 3  | 5  | 5  | 13  | 0.684 | 0.829 | 0.721 | 0.781 | 35.03  | 34.09 | 9  | 13  | 176  | 20.0  | 9.07  |

|          |                                                                                                                                                       |       |    |    |    |     |       |       |       |       |        |       |    |     |      |       |       |
|----------|-------------------------------------------------------------------------------------------------------------------------------------------------------|-------|----|----|----|-----|-------|-------|-------|-------|--------|-------|----|-----|------|-------|-------|
| Q62165   | Dystroglycan OS=Mus musculus GN=Dag1 PE=1 SV=4 - [DAG1_MOUSE]                                                                                         | 19.37 | 1  | 12 | 13 | 40  | 1.191 | 0.919 | 1.046 | 0.782 | 104.56 | 19.37 | 21 | 40  | 893  | 96.8  | 8.44  |
| P15209-2 | Isoform GP95-TRKB of BDNF/NT-3 growth factors receptor OS=Mus musculus GN=Ntrk2 - [NTRK2_MOUSE]                                                       | 21.64 | 1  | 1  | 10 | 66  | 0.246 | 1.352 | 0.637 | 0.782 | 201.97 | 21.64 | 17 | 66  | 476  | 53.2  | 6.47  |
| Q8R1B5   | Complexin-3 OS=Mus musculus GN=Cplx3 PE=1 SV=1 - [CPLX3_MOUSE]                                                                                        | 35.44 | 1  | 5  | 5  | 11  | 0.471 | 1.147 | 2.206 | 0.782 | 28.26  | 35.44 | 7  | 11  | 158  | 17.6  | 4.89  |
| Q9DAU1   | Protein canopy homolog 3 OS=Mus musculus GN=Cnpy3 PE=1 SV=1 - [CNPY3_MOUSE]                                                                           | 31.16 | 3  | 8  | 8  | 19  | 1.414 | 0.818 | 1.042 | 0.782 | 53.21  | 31.16 | 15 | 19  | 276  | 30.5  | 5.62  |
| E9PVK4   | Tetratricopeptide repeat protein 21B OS=Mus musculus GN=Ttc21b PE=2 SV=1 - [TTC21B_MOUSE]                                                             | 3.23  | 2  | 3  | 4  | 6   | 1.382 | 2.168 | 0.969 | 0.782 | 15.57  | 3.23  | 4  | 6   | 1269 | 145.3 | 6.86  |
| D3YWFP3  | MCG1034428 OS=Mus musculus GN=Rpl23a-ps3 PE=3 SV=1 - [D3YWFP3_MOUSE]                                                                                  | 46.79 | 7  | 8  | 8  | 27  | 0.878 | 0.900 | 0.882 | 0.782 | 69.89  | 46.79 | 13 | 27  | 156  | 17.7  | 10.42 |
| P61965   | WD repeat-containing protein 5 OS=Mus musculus GN=Wdr5 PE=1 SV=1 - [WDR5_MOUSE]                                                                       | 19.46 | 2  | 5  | 5  | 11  | 1.499 | 0.995 | 0.717 | 0.782 | 25.33  | 19.46 | 9  | 11  | 334  | 36.6  | 8.27  |
| P49710   | Hematopoietic lineage cell-specific protein OS=Mus musculus GN=Hcls1 PE=1 SV=2 - [HCLS1_MOUSE]                                                        | 26.75 | 2  | 11 | 11 | 40  | 1.760 | 1.060 | 1.065 | 0.782 | 103.44 | 26.75 | 20 | 40  | 486  | 54.2  | 4.84  |
| Q8BM75-2 | Isoform 2 of AT-rich interactive domain-containing protein 5B OS=Mus musculus GN=Arid5b - [ARID5B_MOUSE]                                              | 1.38  | 2  | 1  | 1  | 3   | 1.362 | 1.241 | 0.934 | 0.783 | 10.10  | 1.38  | 2  | 3   | 945  | 104.0 | 9.23  |
| D3YU17   | Nicalin OS=Mus musculus GN=Ncln PE=2 SV=1 - [NICALIN_MOUSE]                                                                                           | 29.18 | 3  | 16 | 16 | 54  | 0.624 | 0.728 | 0.708 | 0.783 | 167.70 | 29.18 | 26 | 54  | 562  | 62.7  | 6.49  |
| Q99JR8-2 | Isoform 2 of SWI/SNF-related matrix-associated actin-dependent regulator of chromatin subfamily D member 2 OS=Mus musculus GN=Smarca2 - [SMRD2_MOUSE] | 16.53 | 3  | 6  | 7  | 10  | 0.841 | 0.805 | 0.822 | 0.783 | 28.52  | 16.53 | 9  | 10  | 484  | 55.3  | 9.48  |
| P59326   | YTH domain family protein 1 OS=Mus musculus GN=Ythdf1 PE=2 SV=1 - [YTHD1_MOUSE]                                                                       | 27.37 | 3  | 8  | 12 | 40  | 1.011 | 0.839 | 1.023 | 0.783 | 71.53  | 27.37 | 18 | 40  | 559  | 60.8  | 8.95  |
| A2BE28-2 | Isoform 2 of Ribosomal biogenesis protein LAS1L OS=Mus musculus GN=Las1l - [LAS1L_MOUSE]                                                              | 13.97 | 2  | 8  | 8  | 23  | 0.831 | 0.991 | 0.766 | 0.783 | 64.52  | 13.97 | 13 | 23  | 759  | 87.5  | 4.42  |
| Q8R311   | CTAGE family member 5 OS=Mus musculus GN=Ctage5 PE=1 SV=1 - [CTGE5_MOUSE]                                                                             | 37.23 | 15 | 25 | 25 | 71  | 1.149 | 0.898 | 0.955 | 0.784 | 205.68 | 37.23 | 41 | 71  | 779  | 87.7  | 5.11  |
| P09405   | Nucleolin OS=Mus musculus GN=Ncl PE=1 SV=2 - [NUCL_MOUSE]                                                                                             | 44.41 | 1  | 41 | 42 | 284 | 1.012 | 0.471 | 1.125 | 0.784 | 796.88 | 44.41 | 72 | 284 | 707  | 76.7  | 4.75  |
| A0T1G3   | C-type lectin domain family 1 member B OS=Mus musculus GN=Clec1b PE=4 SV=1 - [A0T1G3_MOUSE]                                                           | 13.25 | 2  | 1  | 1  | 1   | 0.365 | 2.820 | 2.423 | 0.784 | 1.76   | 13.25 | 1  | 1   | 83   | 9.6   | 8.46  |
| Q9Z247   | Peptidyl-prolyl cis-trans isomerase FKBP9 OS=Mus musculus GN=Fkbp9 PE=1 SV=1 - [FKBP9_MOUSE]                                                          | 10.70 | 1  | 7  | 7  | 13  | 1.295 | 1.090 | 0.860 | 0.784 | 33.89  | 10.70 | 10 | 13  | 570  | 63.0  | 5.21  |
| Q925G2   | Cytochrome b reductase 1 OS=Mus musculus GN=Cybrd1 PE=1 SV=2 - [CYBR1_MOUSE]                                                                          | 19.66 | 2  | 3  | 3  | 15  | 0.871 | 1.025 | 0.503 | 0.784 | 27.41  | 19.66 | 5  | 15  | 290  | 31.8  | 9.06  |
| Q8K2J7-2 | Isoform 2 of RELT-like protein 1 OS=Mus musculus GN=Rel1 - [RELL1_MOUSE]                                                                              | 10.40 | 2  | 3  | 3  | 6   | 0.886 | 0.653 | 0.866 | 0.784 | 14.01  | 10.40 | 6  | 6   | 202  | 22.2  | 8.34  |
| Q3U1Z5   | G-protein-signaling modulator 3 OS=Mus musculus GN=Gpsm3 PE=1 SV=2 - [GPSM3_MOUSE]                                                                    | 13.84 | 1  | 1  | 1  | 2   | 1.629 | 1.204 | 1.232 | 0.784 | 5.16   | 13.84 | 1  | 2   | 159  | 17.6  | 5.20  |
| Q91VK1   | Basic leucine zipper and W2 domain-containing protein 2 OS=Mus musculus GN=Bzw2 PE=1 SV=1 - [BZW2_MOUSE]                                              | 29.59 | 1  | 9  | 13 | 24  | 0.993 | 1.212 | 1.056 | 0.784 | 61.02  | 29.59 | 20 | 24  | 419  | 48.0  | 6.68  |
| Q4VAA7   | Sorting nexin-33 OS=Mus musculus GN=Snx33 PE=2 SV=1 - [SNX33_MOUSE]                                                                                   | 1.39  | 1  | 1  | 1  | 3   | 4.101 | 1.157 | 0.928 | 0.784 | 7.96   | 1.39  | 2  | 3   | 574  | 65.3  | 6.79  |
| F6VUN6   | MICAL C-terminal-like protein (Fragment) OS=Mus musculus GN=Micald PE=4 SV=1 - [F6VUN6_MOUSE]                                                         | 4.20  | 3  | 2  | 2  | 2   | 1.461 | 0.883 | 0.914 | 0.784 | 3.16   | 4.20  | 2  | 2   | 572  | 63.7  | 8.94  |
| Q9CR37   | Pancreatic progenitor cell differentiation and proliferation factor OS=Mus musculus GN=Ppdpf PE=2 SV=1 - [PPDPF_MOUSE]                                | 24.35 | 1  | 2  | 2  | 10  | 1.242 | 0.746 | 1.089 | 0.785 | 21.69  | 24.35 | 4  | 10  | 115  | 12.3  | 7.44  |
| Q8C779-2 | Isoform 2 of Uncharacterized protein Cxor57 homolog OS=Mus musculus - [CXOR57_MOUSE]                                                                  | 2.59  | 2  | 1  | 1  | 3   | 0.956 | 1.543 | 0.686 | 0.785 | 0.00   | 2.59  | 1  | 3   | 849  | 96.7  | 8.73  |

|          |                                                                                                                    |       |    |    |    |     |       |       |       |       |        |       |    |     |      |       |       |
|----------|--------------------------------------------------------------------------------------------------------------------|-------|----|----|----|-----|-------|-------|-------|-------|--------|-------|----|-----|------|-------|-------|
| Q9D824   | Pre-mRNA 3'-end-processing factor FIP1 OS=Mus musculus GN=Fil11 PE=1 SV=1 -                                        | 17.38 | 7  | 9  | 9  | 25  | 1.107 | 0.800 | 0.917 | 0.785 | 64.49  | 17.38 | 17 | 25  | 581  | 64.9  | 5.77  |
| A3KGG3-2 | Isoform 2 of Fer-1-like protein 4 OS=Mus musculus GN=Fer14 - [FR14_MOUSE]                                          | 4.52  | 2  | 4  | 4  | 6   | 0.765 | 0.751 | 1.028 | 0.785 | 6.96   | 4.52  | 4  | 6   | 1901 | 213.0 | 5.96  |
| O88532   | Zinc finger RNA-binding protein OS=Mus musculus GN=Zfr PE=1 SV=2 - [ZFR_MOUSE]                                     | 25.51 | 5  | 20 | 20 | 93  | 0.697 | 0.577 | 0.912 | 0.785 | 307.55 | 25.51 | 36 | 93  | 1074 | 116.8 | 9.04  |
| P62315   | Small nuclear ribonucleoprotein Sm D1 OS=Mus musculus GN=Snrpd1 PE=1 SV=1 -                                        | 36.97 | 1  | 4  | 4  | 15  | 0.732 | 0.586 | 0.697 | 0.785 | 43.74  | 36.97 | 8  | 15  | 119  | 13.3  | 11.56 |
| Q9CQR2   | 40S ribosomal protein S21 OS=Mus musculus GN=Rps21 PE=2 SV=1 - [RS21_MOUSE]                                        | 36.14 | 1  | 3  | 3  | 38  | 1.835 | 0.853 | 1.065 | 0.785 | 116.72 | 36.14 | 6  | 38  | 83   | 9.1   | 8.51  |
| Q80YR4-2 | Isoform 2 of Zinc finger protein 598 OS=Mus musculus GN=Znf598 - [ZN598_MOUSE]                                     | 17.50 | 3  | 12 | 12 | 23  | 0.728 | 0.685 | 0.873 | 0.786 | 76.77  | 17.50 | 17 | 23  | 880  | 96.3  | 8.29  |
| P08113   | Endoplasmic reticulum protein OS=Mus musculus GN=Hsp90b1 PE=1 SV=2 - [ENPL_MOUSE]                                  | 47.63 | 2  | 38 | 40 | 277 | 0.885 | 1.109 | 0.764 | 0.786 | 762.12 | 47.63 | 67 | 277 | 802  | 92.4  | 4.82  |
| Q9CXU9   | Eukaryotic translation initiation factor 1b OS=Mus musculus GN=Elf1b PE=2 SV=2 - [EIF1B_MOUSE]                     | 60.18 | 5  | 1  | 5  | 32  | 1.557 | 0.525 | 0.916 | 0.786 | 128.18 | 60.18 | 9  | 32  | 113  | 12.8  | 7.37  |
| B7ZCE0   | N-acetyltransferase 6 (Fragment) OS=Mus musculus GN=Nat6 PE=4 SV=1 - [B7ZCE0_MOUSE]                                | 5.39  | 2  | 1  | 1  | 1   | 2.668 | 0.558 | 0.935 | 0.786 | 2.81   | 5.39  | 1  | 1   | 204  | 22.5  | 8.24  |
| Q8C0C7   | Phenylalanine-tRNA ligase alpha subunit OS=Mus musculus GN=Farsa PE=2 SV=1 - [SYFA_MOUSE]                          | 43.31 | 3  | 20 | 20 | 63  | 0.681 | 0.734 | 0.702 | 0.786 | 195.76 | 43.31 | 32 | 63  | 508  | 57.6  | 8.28  |
| F6QRE9   | Protein BC007180 (Fragment) OS=Mus musculus GN=BC007180 PE=4 SV=2 -                                                | 6.30  | 1  | 3  | 3  | 4   | 2.360 | 1.251 | 1.005 | 0.786 | 9.55   | 6.30  | 4  | 4   | 889  | 95.3  | 4.37  |
| Q61595-3 | Isoform 3 of Kinetin OS=Mus musculus GN=Ktn1 - [KTN1_MOUSE]                                                        | 49.27 | 4  | 4  | 57 | 181 | 1.715 | 1.212 | 1.057 | 0.786 | 518.38 | 49.27 | 96 | 181 | 1228 | 140.9 | 6.13  |
| A2AWT6   | Nucleolar transcription factor 1 OS=Mus musculus GN=Ubtf PE=4 SV=1 - [A2AWT6_MOUSE]                                | 19.53 | 7  | 14 | 15 | 24  | 0.483 | 0.814 | 0.918 | 0.786 | 62.57  | 19.53 | 21 | 24  | 727  | 85.0  | 5.55  |
| Q8BRG8-2 | Isoform 2 of Transmembrane protein 209 OS=Mus musculus GN=Tmem209 -                                                | 11.96 | 5  | 5  | 5  | 6   | 0.872 | 0.998 | 0.818 | 0.787 | 8.12   | 11.96 | 6  | 6   | 560  | 62.8  | 8.73  |
| Q6GU68   | Immunoglobulin superfamily containing leucine-rich repeat protein OS=Mus musculus GN=Isir PE=1 SV=1 - [ISIR_MOUSE] | 8.18  | 1  | 2  | 2  | 2   | 1.122 | 2.220 | 0.813 | 0.787 | 2.04   | 8.18  | 2  | 2   | 428  | 45.6  | 5.38  |
| E9Q7E2   | Protein Arid2 OS=Mus musculus GN=Arid2 PE=2 SV=1 - [E9Q7E2_MOUSE]                                                  | 4.21  | 2  | 6  | 8  | 10  | 0.662 | 0.969 | 0.716 | 0.787 | 25.81  | 4.21  | 10 | 10  | 1828 | 195.9 | 7.47  |
| P24369   | Peptidyl-prolyl cis-trans isomerase B OS=Mus musculus GN=Ppib PE=2 SV=2 - [PPIB_MOUSE]                             | 51.85 | 1  | 11 | 12 | 146 | 1.383 | 0.845 | 0.734 | 0.787 | 358.72 | 51.85 | 24 | 146 | 216  | 23.7  | 9.55  |
| Q9D6T0   | Nitric oxide synthase-interacting protein OS=Mus musculus GN=Nosip PE=2 SV=1 - [NOSIP_MOUSE]                       | 24.58 | 3  | 7  | 7  | 11  | 0.971 | 0.835 | 0.979 | 0.787 | 35.26  | 24.58 | 11 | 11  | 301  | 33.2  | 8.62  |
| R4GML6   | Centriolin (Fragment) OS=Mus musculus GN=Cep110 PE=4 SV=1 - [R4GML6_MOUSE]                                         | 1.47  | 15 | 2  | 5  | 6   | 2.306 | 2.099 | 1.138 | 0.787 | 14.60  | 1.47  | 5  | 6   | 2316 | 266.6 | 5.52  |
| E9QM77   | Ataxin-2 OS=Mus musculus GN=Atxn2 PE=2 SV=1 - [E9QM77_MOUSE]                                                       | 29.24 | 6  | 21 | 29 | 119 | 1.396 | 0.658 | 0.964 | 0.787 | 374.86 | 29.24 | 46 | 119 | 1286 | 136.4 | 9.54  |
| Q3UN90   | LYR motif-containing protein 9 OS=Mus musculus GN=Lym9 PE=2 SV=1 - [LYRM9_MOUSE]                                   | 21.79 | 5  | 1  | 2  | 5   | 1.001 | 1.408 | 1.373 | 0.787 | 11.93  | 21.79 | 2  | 5   | 78   | 9.3   | 8.91  |
| Q9CU65   | Zinc finger MYM-type protein 2 OS=Mus musculus GN=Zmy2 PE=2 SV=3 -                                                 | 4.80  | 2  | 6  | 6  | 17  | 1.600 | 0.833 | 1.088 | 0.787 | 37.86  | 4.80  | 10 | 17  | 1376 | 154.5 | 6.37  |
| Q8K2Y7   | 39S ribosomal protein L47, mitochondrial OS=Mus musculus GN=Mrip47 PE=2 SV=2 - [RM47_MOUSE]                        | 21.83 | 1  | 5  | 5  | 18  | 0.728 | 0.494 | 0.770 | 0.787 | 46.30  | 21.83 | 8  | 18  | 252  | 29.7  | 10.21 |
| E9Q955   | Protein Gm9964 OS=Mus musculus GN=Gm9964 PE=4 SV=1 - [E9Q955_MOUSE]                                                | 16.67 | 1  | 1  | 1  | 1   | 2.552 | 0.934 | 1.094 | 0.787 | 0.00   | 16.67 | 1  | 1   | 144  | 16.6  | 10.01 |
| Q8CFB8   | NAD+ ADP-ribosyltransferase 3 PARP-3 OS=Mus musculus GN=Parp3 PE=2 SV=1 - [Q8CFB8_MOUSE]                           | 4.17  | 4  | 2  | 2  | 5   | 2.285 | 1.553 | 0.891 | 0.787 | 9.52   | 4.17  | 3  | 5   | 528  | 59.4  | 7.12  |
| D3Z2K2   | 28S ribosomal protein S14, mitochondrial OS=Mus musculus GN=Mrips14 PE=2 SV=1 - [D3Z2K2_MOUSE]                     | 18.03 | 2  | 2  | 2  | 11  | 0.765 | 0.461 | 1.015 | 0.787 | 31.40  | 18.03 | 4  | 11  | 122  | 14.3  | 10.86 |

|          |                                                                                                                              |       |    |    |    |     |        |       |       |       |         |       |    |     |      |       |       |
|----------|------------------------------------------------------------------------------------------------------------------------------|-------|----|----|----|-----|--------|-------|-------|-------|---------|-------|----|-----|------|-------|-------|
| Q9D614   | Syntaxin 17, isoform CRA_b OS=Mus musculus GN=Sbx17 PE=2 SV=1 - [Q9D614_MOUSE]                                               | 14.86 | 2  | 1  | 5  | 11  | 8.017  | 1.877 | 0.519 | 0.787 | 26.26   | 14.86 | 7  | 11  | 276  | 31.5  | 6.47  |
| Q9R0P3   | S-formylglutathione hydrolase OS=Mus musculus GN=Esd PE=2 SV=1 - [ESTD_MOUSE]                                                | 57.80 | 8  | 10 | 10 | 54  | 0.892  | 0.715 | 0.823 | 0.788 | 192.70  | 57.80 | 18 | 54  | 282  | 31.3  | 7.12  |
| Q3USH5   | Splicing factor, suppressor of white-apricot homolog OS=Mus musculus GN=Sfswap PE=1 SV=2 - [SFSWA_MOUSE]                     | 3.28  | 1  | 3  | 3  | 6   | 0.795  | 0.686 | 0.856 | 0.788 | 11.48   | 3.28  | 4  | 6   | 945  | 104.1 | 8.05  |
| Q8R2S9   | Actin-related protein 8 OS=Mus musculus GN=Actr8 PE=2 SV=1 - [ARF8_MOUSE]                                                    | 3.37  | 1  | 2  | 2  | 3   | 0.761  | 0.732 | 0.702 | 0.788 | 6.18    | 3.37  | 3  | 3   | 624  | 70.5  | 7.77  |
| F6V035   | Protein Ccdc149 OS=Mus musculus GN=Ccdc149 PE=4 SV=1 - [F6V035_MOUSE]                                                        | 11.26 | 1  | 5  | 6  | 18  | 1.425  | 1.188 | 1.070 | 0.788 | 52.07   | 11.26 | 10 | 18  | 524  | 58.8  | 5.57  |
| Q9CR41   | Huntingtin-interacting protein K OS=Mus musculus GN=Hypk PE=2 SV=2 - [HYPK_MOUSE]                                            | 42.64 | 2  | 5  | 5  | 34  | 2.150  | 0.922 | 1.212 | 0.788 | 105.45  | 42.64 | 9  | 34  | 129  | 14.7  | 4.93  |
| Q9QZQ1-2 | Isoform 1 of Afadin OS=Mus musculus GN=Mil4 - [AFAD_MOUSE]                                                                   | 36.40 | 4  | 1  | 53 | 173 | 1.038  | 1.176 | 0.766 | 0.788 | 501.17  | 36.40 | 88 | 173 | 1805 | 204.4 | 6.24  |
| P28798   | Granulins OS=Mus musculus GN=Gm PE=1 SV=2 - [GRN_MOUSE]                                                                      | 11.04 | 5  | 5  | 5  | 16  | 1.396  | 0.758 | 1.042 | 0.788 | 45.63   | 11.04 | 10 | 16  | 589  | 63.4  | 6.80  |
| Q9CPT4   | UPF0556 protein C19orf10 homolog OS=Mus musculus GN=D17Wsu104e PE=2 SV=1 - [CS010_MOUSE]                                     | 28.31 | 1  | 4  | 4  | 18  | 1.443  | 0.895 | 0.757 | 0.788 | 45.43   | 28.31 | 8  | 18  | 166  | 18.0  | 6.79  |
| Q91ZD4   | Vang-like protein 2 OS=Mus musculus GN=Vangl2 PE=1 SV=3 - [VANG2_MOUSE]                                                      | 13.44 | 4  | 5  | 5  | 14  | 0.632  | 0.540 | 0.560 | 0.788 | 46.39   | 13.44 | 8  | 14  | 521  | 59.7  | 9.22  |
| P61804   | Dolichyl-diphosphooligosaccharide--protein glycosyltransferase subunit DAD1 OS=Mus musculus GN=Dad1 PE=2 SV=2 - [DAD1_MOUSE] | 19.47 | 1  | 2  | 2  | 9   | 0.593  | 1.075 | 0.609 | 0.789 | 29.41   | 19.47 | 4  | 9   | 113  | 12.5  | 7.08  |
| E9QML5   | Zinc finger protein 638 OS=Mus musculus GN=Zfml PE=2 SV=1 - [E9QML5_MOUSE]                                                   | 17.76 | 10 | 26 | 26 | 65  | 0.940  | 0.643 | 1.131 | 0.789 | 177.67  | 17.76 | 44 | 65  | 1926 | 214.3 | 6.76  |
| P97427   | Dihydropyrimidinase-related protein 1 OS=Mus musculus GN=Cmp1 PE=1 SV=1 -                                                    | 75.87 | 1  | 2  | 34 | 951 | 1.050  | 0.887 | 0.874 | 0.789 | 2555.72 | 75.87 | 64 | 951 | 572  | 62.1  | 7.12  |
| Q8BHG9   | CGG triplet repeat-binding protein 1 OS=Mus musculus GN=Cggbp1 PE=2 SV=1 -                                                   | 22.16 | 1  | 3  | 3  | 5   | 0.795  | 0.637 | 0.883 | 0.789 | 18.54   | 22.16 | 5  | 5   | 167  | 18.7  | 8.95  |
| Q3UQN2   | FCH domain only protein 2 OS=Mus musculus GN=Fcho2 PE=1 SV=1 - [FCHO2_MOUSE]                                                 | 17.43 | 5  | 12 | 13 | 35  | 0.921  | 1.201 | 0.800 | 0.789 | 110.97  | 17.43 | 23 | 35  | 809  | 88.7  | 6.89  |
| P70195   | Proteasome subunit beta type-7 OS=Mus musculus GN=Psmb7 PE=1 SV=1 - [PSB7_MOUSE]                                             | 14.80 | 1  | 4  | 4  | 37  | 1.545  | 0.871 | 0.758 | 0.789 | 96.06   | 14.80 | 8  | 37  | 277  | 29.9  | 7.99  |
| O09012   | Peroxisomal targeting signal 1 receptor OS=Mus musculus GN=Pex5 PE=2 SV=2 - [PEX5_MOUSE]                                     | 33.49 | 3  | 15 | 15 | 57  | 1.093  | 1.079 | 0.746 | 0.789 | 192.39  | 33.49 | 25 | 57  | 639  | 70.7  | 4.55  |
| P70208   | Plexin-A3 OS=Mus musculus GN=Plxna3 PE=1 SV=2 - [PLXA3_MOUSE]                                                                | 14.85 | 2  | 14 | 28 | 68  | 0.736  | 0.965 | 0.649 | 0.789 | 189.57  | 14.85 | 49 | 68  | 1872 | 207.8 | 7.09  |
| Q9EQC4   | Elongation of very long chain fatty acids protein 4 OS=Mus musculus GN=Elov4 PE=1 SV=2 - [ELOV4_MOUSE]                       | 2.88  | 1  | 1  | 1  | 1   | 0.725  | 0.725 | 0.528 | 0.789 | 0.00    | 2.88  | 1  | 1   | 312  | 36.5  | 9.23  |
| P27792   | Protein lyl-1 OS=Mus musculus GN=Lyl1 PE=2 SV=2 - [LYL1_MOUSE]                                                               | 6.12  | 1  | 1  | 1  | 1   | 21.216 | 1.527 | 0.773 | 0.789 | 3.23    | 6.12  | 1  | 1   | 278  | 30.1  | 10.29 |
| F8WHP5   | Phospholipase DDHD1 OS=Mus musculus GN=Ddhd1 PE=2 SV=1 - [F8WHP5_MOUSE]                                                      | 23.25 | 8  | 15 | 15 | 42  | 1.128  | 0.792 | 0.897 | 0.789 | 118.67  | 23.25 | 24 | 42  | 856  | 94.7  | 5.69  |
| Q8BE6    | FERM domain-containing protein 4A OS=Mus musculus GN=Ffmd4a PE=1 SV=2 -                                                      | 25.88 | 10 | 21 | 22 | 78  | 0.839  | 0.590 | 0.927 | 0.789 | 274.32  | 25.88 | 37 | 78  | 1020 | 113.8 | 8.92  |
| B9EKR1   | Protein Ptptr1 OS=Mus musculus GN=Ptptr1 PE=2 SV=1 - [B9EKR1_MOUSE]                                                          | 15.44 | 1  | 32 | 33 | 244 | 1.314  | 1.058 | 1.170 | 0.790 | 671.43  | 15.44 | 62 | 244 | 2312 | 254.2 | 4.88  |
| Q8BXA0   | Leucine-rich repeat and fibronectin type-III domain containing protein 5 OS=Mus musculus GN=Lfrfs PE=1 SV=1 - [LFRFS_MOUSE]  | 17.94 | 2  | 9  | 10 | 24  | 0.752  | 0.839 | 0.801 | 0.790 | 79.70   | 17.94 | 17 | 24  | 719  | 79.3  | 7.24  |
| O35381   | Acidic leucine-rich nuclear phosphoprotein 32 family member A OS=Mus musculus GN=Anp32a PE=1 SV=1 - [ANP32A_MOUSE]           | 46.96 | 4  | 7  | 14 | 205 | 1.229  | 1.008 | 1.202 | 0.790 | 506.43  | 46.96 | 23 | 205 | 247  | 28.5  | 4.07  |

|          |                                                                                                                       |       |   |    |    |     |       |       |       |       |        |       |    |     |      |       |       |
|----------|-----------------------------------------------------------------------------------------------------------------------|-------|---|----|----|-----|-------|-------|-------|-------|--------|-------|----|-----|------|-------|-------|
| P51949   | CDK-activating kinase assembly factor MAT1<br>OS=Mus musculus<br>GN=Mnat1 PE=2 SV=2 - [MAT1_MOUSE]                    | 18.45 | 1 | 5  | 5  | 13  | 1.234 | 0.999 | 0.993 | 0.790 | 29.00  | 18.45 | 10 | 13  | 309  | 35.8  | 5.82  |
| O35900   | U6 snRNA-associated Sm-like protein LSM2 OS=Mus musculus GN=Lsm2 PE=2 SV=1 - [LSM2_MOUSE]                             | 74.74 | 3 | 7  | 7  | 24  | 1.774 | 0.802 | 1.115 | 0.790 | 43.16  | 74.74 | 11 | 24  | 95   | 10.8  | 6.52  |
| Q60929-2 | Isoform 2 of Myocyte-specific enhancer factor 2A<br>OS=Mus musculus<br>GN=Mef2a - [MEF2A_MOUSE]                       | 13.27 | 6 | 3  | 5  | 13  | 1.091 | 1.233 | 1.885 | 0.790 | 28.86  | 13.27 | 7  | 13  | 490  | 52.6  | 8.69  |
| Q6P8I4   | PEST proteolytic signal-containing nuclear protein<br>OS=Mus musculus<br>GN=Pcpn PE=1 SV=1 - [PCNP_MOUSE]             | 26.97 | 6 | 6  | 6  | 37  | 1.746 | 0.817 | 1.209 | 0.790 | 92.11  | 26.97 | 10 | 37  | 178  | 19.0  | 7.49  |
| Q80Z11   | TMF-regulated nuclear protein 1 OS=Mus musculus GN=Trnp1 PE=1 SV=1 - [TRNP1_MOUSE]                                    | 14.80 | 1 | 2  | 2  | 3   | 0.588 | 0.422 | 1.100 | 0.790 | 11.86  | 14.80 | 3  | 3   | 223  | 23.1  | 11.43 |
| Q80U16-7 | Isoform 7 of Protein FAM65B OS=Mus musculus GN=Fam65b - [FAM65B_MOUSE]                                                | 13.06 | 8 | 6  | 6  | 11  | 1.069 | 1.427 | 1.213 | 0.791 | 25.75  | 13.06 | 11 | 11  | 605  | 67.1  | 5.54  |
| Q99KI3   | ER membrane protein complex subunit 3<br>OS=Mus musculus<br>GN=Emc3 PE=2 SV=3 - [EMC3_MOUSE]                          | 19.16 | 1 | 7  | 7  | 33  | 0.586 | 0.658 | 0.707 | 0.791 | 87.87  | 19.16 | 12 | 33  | 261  | 30.0  | 6.81  |
| Q7TQH0-3 | Isoform 3 of Ataxin-2-like protein OS=Mus musculus GN=Abxn2 - [ATX2L_MOUSE]                                           | 28.19 | 6 | 22 | 24 | 127 | 1.471 | 0.867 | 1.073 | 0.791 | 381.18 | 28.19 | 43 | 127 | 1043 | 109.9 | 8.85  |
| Q810A5   | Uncharacterized protein KIAA0895-like OS=Mus musculus GN=Kiaa0895l PE=2 SV=1 - [K895L_MOUSE]                          | 5.14  | 1 | 1  | 1  | 3   | 1.762 | 1.000 | 0.892 | 0.791 | 0.00   | 5.14  | 1  | 3   | 467  | 53.1  | 8.38  |
| Q8VDC1   | FYVE and coiled-coil domain-containing protein 1 OS=Mus musculus GN=Fyco1 PE=1 SV=1 - [FYCO1_MOUSE]                   | 11.00 | 5 | 10 | 11 | 29  | 1.612 | 0.916 | 1.031 | 0.791 | 104.48 | 11.00 | 18 | 29  | 1437 | 162.2 | 4.98  |
| Q6WVG3   | BTB/POZ domain-containing protein KCTD12<br>OS=Mus musculus<br>GN=Kctd12 PE=1 SV=1 - [KCD12_MOUSE]                    | 39.45 | 1 | 9  | 12 | 90  | 1.152 | 1.115 | 0.798 | 0.791 | 311.37 | 39.45 | 22 | 90  | 327  | 35.9  | 5.81  |
| Q9CPT5   | Nucleolar protein 16<br>OS=Mus musculus<br>GN=Nop16 PE=2 SV=1 - [NOP16_MOUSE]                                         | 20.22 | 3 | 4  | 4  | 7   | 0.791 | 0.901 | 0.861 | 0.791 | 11.83  | 20.22 | 6  | 7   | 178  | 21.1  | 9.91  |
| Q5NCD5   | Transcription termination factor 2 OS=Mus musculus GN=Ttf2 PE=1 SV=2 - [TTF2_MOUSE]                                   | 4.31  | 1 | 3  | 5  | 9   | 1.613 | 0.734 | 1.061 | 0.791 | 6.86   | 4.31  | 5  | 9   | 1138 | 125.5 | 8.90  |
| Q8R370   | Usher syndrome type-1C protein-binding protein 1 OS=Mus musculus GN=Ushbp1 PE=1 SV=2 - [USBP1_MOUSE]                  | 3.38  | 1 | 2  | 2  | 2   | 1.889 | 0.732 | 1.314 | 0.791 | 4.75   | 3.38  | 2  | 2   | 680  | 74.9  | 5.54  |
| D3YY06   | tRNA-splicing endonuclease subunit Sen34 (Fragment)<br>OS=Mus musculus<br>GN=Sen34 PE=2 SV=1 - [SYNASE34_MOUSE]       | 32.45 | 7 | 4  | 4  | 5   | 5.023 | 0.831 | 0.255 | 0.791 | 15.10  | 32.45 | 5  | 5   | 151  | 16.1  | 5.66  |
| Q08575-2 | Isoform 2 of Eyes absent homolog 2 OS=Mus musculus GN=Eya2 - [EYA2_MOUSE]                                             | 3.38  | 2 | 1  | 1  | 1   | 7.307 | 1.207 | 1.087 | 0.791 | 2.37   | 3.38  | 1  | 1   | 503  | 55.3  | 6.05  |
| Q8CH02   | SURP and G-patch domain-containing protein 1 OS=Mus musculus GN=Sugp1 PE=1 SV=1 - [SUGP1_MOUSE]                       | 24.11 | 1 | 11 | 11 | 25  | 1.468 | 0.835 | 0.984 | 0.791 | 73.18  | 24.11 | 20 | 25  | 643  | 72.6  | 7.64  |
| Q19A41   | Kruppel-like factor 14 OS=Mus musculus GN=Klf14 PE=2 SV=1 - [KLF14_MOUSE]                                             | 12.00 | 1 | 1  | 1  | 1   | 0.941 | 0.454 | 1.447 | 0.791 | 0.00   | 12.00 | 1  | 1   | 325  | 35.1  | 6.23  |
| Q8C025   | Cholinephosphotransferase 1 OS=Mus musculus GN=Chpt1 PE=2 SV=1 - [CHPT1_MOUSE]                                        | 6.03  | 6 | 2  | 2  | 4   | 0.818 | 0.493 | 0.675 | 0.792 | 10.01  | 6.03  | 4  | 4   | 398  | 44.6  | 7.08  |
| Q9D116   | 39S ribosomal protein L14, mitochondrial OS=Mus musculus GN=Mrip14 PE=2 SV=1 - [RM14_MOUSE]                           | 41.38 | 1 | 5  | 5  | 13  | 1.211 | 0.558 | 0.746 | 0.792 | 35.12  | 41.38 | 8  | 13  | 145  | 15.9  | 10.99 |
| Q9DCD5   | Tight junction-associated protein 1 OS=Mus musculus GN=Tjap1 PE=1 SV=1 - [TJAP1_MOUSE]                                | 4.27  | 1 | 1  | 2  | 6   | 1.544 | 0.998 | 0.848 | 0.792 | 19.61  | 4.27  | 4  | 6   | 539  | 59.4  | 6.07  |
| Q61142   | Spindlin-1 OS=Mus musculus GN=Spin1 PE=1 SV=2 - [SPIN1_MOUSE]                                                         | 48.47 | 3 | 8  | 8  | 28  | 0.666 | 0.504 | 0.722 | 0.792 | 78.98  | 48.47 | 15 | 28  | 262  | 29.6  | 6.96  |
| Q8BWP8-2 | Isoform 2 of N-acetyllactosaminide beta-1,3-N-acetylglucosaminyltransferase OS=Mus musculus GN=B3gnt1 - [B3GN1_MOUSE] | 14.25 | 2 | 4  | 4  | 10  | 1.120 | 0.938 | 0.679 | 0.792 | 32.01  | 14.25 | 6  | 10  | 379  | 43.0  | 7.71  |

|        |                                                                                                                                                                                           |       |   |    |    |     |       |       |       |       |        |       |    |     |      |       |       |
|--------|-------------------------------------------------------------------------------------------------------------------------------------------------------------------------------------------|-------|---|----|----|-----|-------|-------|-------|-------|--------|-------|----|-----|------|-------|-------|
| E9Q705 | Bola-like protein 3<br>OS=Mus musculus<br>GN=Bola3 PE=2 SV=1 -<br>[E9Q705_MOUSE]                                                                                                          | 42.11 | 3 | 3  | 3  | 16  | 1.811 | 0.568 | 1.069 | 0.793 | 56.00  | 42.11 | 6  | 16  | 95   | 10.8  | 8.31  |
| Q91YA2 | Serine/threonine-protein<br>kinase H1 OS=Mus<br>musculus GN=Pskh1 PE=2<br>SV=3 - [KPSH1_MOUSE]                                                                                            | 5.90  | 1 | 2  | 2  | 6   | 1.762 | 0.809 | 0.944 | 0.793 | 4.29   | 5.90  | 4  | 6   | 424  | 48.1  | 9.83  |
| Q9J1Q3 | Diablo homolog,<br>mitochondrial OS=Mus<br>musculus GN=Diablo PE=1<br>SV=2 - [DBLOH_MOUSE]                                                                                                | 13.92 | 3 | 4  | 4  | 5   | 1.939 | 0.570 | 1.029 | 0.793 | 11.86  | 13.92 | 5  | 5   | 237  | 26.8  | 6.37  |
| Q04692 | SWI/SNF-related matrix-<br>associated actin-<br>dependent regulator of<br>chromatin subfamily A<br>containing DEAD/H box 1<br>OS=Mus musculus<br>GN=Smarcad1 PE=1 SV=2<br>- [SMRCD_MOUSE] | 4.31  | 1 | 2  | 3  | 5   | 0.815 | 0.759 | 0.845 | 0.793 | 15.02  | 4.31  | 4  | 5   | 1021 | 116.4 | 5.68  |
| Q3TJ26 | Protein FAM98A OS=Mus<br>musculus GN=Fam98a<br>PE=2 SV=1 -<br>[FA98A_MOUSE]                                                                                                               | 19.81 | 1 | 5  | 8  | 51  | 1.447 | 0.673 | 0.899 | 0.793 | 214.25 | 19.81 | 15 | 51  | 515  | 55.0  | 8.95  |
| G3X9J0 | MCG122846 OS=Mus<br>musculus GN=Sipa113<br>PE=4 SV=1 -<br>[G3X9J0_MOUSE]                                                                                                                  | 16.84 | 1 | 22 | 24 | 36  | 0.915 | 0.789 | 1.394 | 0.793 | 84.26  | 16.84 | 32 | 36  | 1776 | 194.9 | 8.32  |
| Q8CB87 | Ras-related protein Rab-44<br>OS=Mus musculus<br>GN=Rab44 PE=2 SV=1 -<br>[RAB44_MOUSE]                                                                                                    | 4.00  | 1 | 3  | 3  | 3   | 1.166 | 3.146 | 0.933 | 0.793 | 6.86   | 4.00  | 3  | 3   | 725  | 78.2  | 4.83  |
| Q9D1M7 | Peptidyl-prolyl cis-trans<br>isomerase FKBP11<br>OS=Mus musculus<br>GN=Fkbp11 PE=2 SV=1 -<br>[FKB11_MOUSE]                                                                                | 19.40 | 1 | 3  | 3  | 5   | 0.936 | 0.628 | 0.554 | 0.793 | 12.35  | 19.40 | 5  | 5   | 201  | 22.1  | 9.36  |
| Q91XD2 | LIM and senescent cell<br>antigen-like-containing<br>domain protein 2 OS=Mus<br>musculus GN=Lims2 PE=1<br>SV=1 - [LIMS2_MOUSE]                                                            | 13.78 | 1 | 2  | 5  | 16  | 1.498 | 1.058 | 0.840 | 0.793 | 44.14  | 13.78 | 9  | 16  | 341  | 39.0  | 7.97  |
| Q91UZ1 | Phospholipase C beta 4<br>OS=Mus musculus<br>GN=Pcb4 PE=2 SV=1 -<br>[Q91UZ1_MOUSE]                                                                                                        | 37.45 | 2 | 32 | 43 | 132 | 0.581 | 0.355 | 0.595 | 0.793 | 402.79 | 37.45 | 72 | 132 | 1175 | 134.4 | 6.90  |
| Q91XV3 | Brain acid soluble protein<br>1 OS=Mus musculus<br>GN=Basp1 PE=1 SV=3 -<br>[BASP1_MOUSE]                                                                                                  | 81.86 | 1 | 13 | 13 | 173 | 0.793 | 0.928 | 1.045 | 0.793 | 408.92 | 81.86 | 20 | 173 | 226  | 22.1  | 4.51  |
| Q9WV06 | Ankyrin repeat domain-<br>containing protein 2<br>OS=Mus musculus<br>GN=Ankr2 PE=2 SV=2 -<br>[ANKR2_MOUSE]                                                                                | 6.70  | 1 | 1  | 1  | 1   | 4.817 | 1.120 | 1.436 | 0.793 | 3.44   | 6.70  | 1  | 1   | 358  | 39.8  | 6.67  |
| O55142 | 60S ribosomal protein<br>L35a OS=Mus musculus<br>GN=Rpl35a PE=2 SV=2 -<br>[RL35A_MOUSE]                                                                                                   | 49.09 | 1 | 7  | 7  | 17  | 0.442 | 0.638 | 0.764 | 0.793 | 36.66  | 49.09 | 10 | 17  | 110  | 12.5  | 10.89 |
| Q9CRD2 | ER membrane protein<br>complex subunit 2<br>OS=Mus musculus<br>GN=Emc2 PE=2 SV=1 -<br>[EMC2_MOUSE]                                                                                        | 34.34 | 1 | 9  | 9  | 37  | 1.334 | 0.624 | 0.846 | 0.793 | 103.86 | 34.34 | 14 | 37  | 297  | 34.9  | 6.81  |
| Q9D024 | Coiled-coil domain-<br>containing protein 47<br>OS=Mus musculus<br>GN=Ccdc47 PE=2 SV=2 -<br>[CCD47_MOUSE]                                                                                 | 32.71 | 4 | 13 | 13 | 36  | 0.760 | 0.671 | 0.809 | 0.794 | 98.57  | 32.71 | 20 | 36  | 483  | 55.8  | 4.84  |
| A6PWC3 | Nardilysin OS=Mus<br>musculus GN=Nrd1 PE=2<br>SV=1 - [A6PWC3_MOUSE]                                                                                                                       | 28.74 | 4 | 28 | 28 | 95  | 1.051 | 0.973 | 0.763 | 0.794 | 264.90 | 28.74 | 48 | 95  | 1117 | 127.7 | 4.87  |
| Q8V1D6 | Splicing factor, proline-<br>and glutamine-rich<br>OS=Mus musculus<br>GN=Sfpq PE=1 SV=1 -<br>[SFPQ_MOUSE]                                                                                 | 32.76 | 1 | 22 | 23 | 234 | 1.380 | 0.801 | 1.031 | 0.794 | 597.99 | 32.76 | 41 | 234 | 699  | 75.4  | 9.44  |
| Q9EP82 | tRNA (guanine-N(7))-<br>methyltransferase subunit<br>WDR4 OS=Mus musculus<br>GN=Wdr4 PE=1 SV=2 -<br>[WDR4_MOUSE]                                                                          | 1.45  | 3 | 1  | 1  | 2   | 0.891 | 1.011 | 0.793 | 0.794 | 0.00   | 1.45  | 1  | 2   | 413  | 45.7  | 6.44  |
| Q8CGB3 | Uveal autoantigen with<br>coiled-coil domains and<br>ankyrin repeats OS=Mus<br>musculus GN=Uaca PE=1<br>SV=2 - [UACA_MOUSE]                                                               | 7.58  | 3 | 9  | 11 | 19  | 1.659 | 1.984 | 0.806 | 0.794 | 49.19  | 7.58  | 16 | 19  | 1411 | 160.7 | 7.20  |
| Q3UY34 | Uncharacterized protein<br>Cl2orf43 homolog<br>OS=Mus musculus PE=2<br>SV=1 - [CL043_MOUSE]                                                                                               | 19.53 | 1 | 4  | 4  | 8   | 1.727 | 1.254 | 0.881 | 0.794 | 20.43  | 19.53 | 6  | 8   | 256  | 27.6  | 8.70  |
| Q99LJ0 | CTTNBP2 N-terminal-like<br>protein OS=Mus musculus<br>GN=Ctnb2n1 PE=1 SV=1<br>- [CT2NL_MOUSE]                                                                                             | 29.94 | 1 | 15 | 16 | 51  | 1.602 | 0.629 | 1.078 | 0.794 | 141.66 | 29.94 | 27 | 51  | 638  | 69.8  | 7.71  |
| Q9JHQ5 | Leucine zipper<br>transcription factor-like<br>protein 1 OS=Mus<br>musculus GN=Lztl1 PE=2<br>SV=1 - [LZTL1_MOUSE]                                                                         | 49.16 | 4 | 14 | 14 | 82  | 1.746 | 1.101 | 0.979 | 0.794 | 203.63 | 49.16 | 25 | 82  | 299  | 34.8  | 5.17  |
| A2ACJ2 | Fanconi anemia-associated<br>protein of 100 kDa<br>OS=Mus musculus<br>GN=Faap100 PE=2 SV=1 -<br>[FP100_MOUSE]                                                                             | 7.39  | 1 | 4  | 4  | 6   | 2.448 | 1.451 | 1.041 | 0.794 | 17.09  | 7.39  | 6  | 6   | 879  | 94.2  | 5.36  |
| Q80WTO | Junctophilin-4 OS=Mus<br>musculus GN=Jph4 PE=2<br>SV=1 - [JPH4_MOUSE]                                                                                                                     | 6.53  | 1 | 3  | 3  | 8   | 1.058 | 1.966 | 1.202 | 0.794 | 16.11  | 6.53  | 6  | 8   | 628  | 66.0  | 6.71  |

|          |                                                                                                                              |       |   |    |    |     |       |       |       |       |        |       |    |     |      |       |       |
|----------|------------------------------------------------------------------------------------------------------------------------------|-------|---|----|----|-----|-------|-------|-------|-------|--------|-------|----|-----|------|-------|-------|
| Q8R2M2   | Deoxynucleotidyltransferase terminal-interacting protein 2 OS=Mus musculus GN=Dnttip2 PE=1 SV=1 - [DNTTP2_MOUSE]             | 8.84  | 2 | 3  | 4  | 8   | 0.645 | 0.993 | 0.626 | 0.794 | 18.94  | 8.84  | 6  | 8   | 758  | 84.2  | 6.44  |
| Q3UNZ2   | Gene model 853, (NCBI) OS=Mus musculus GN=Gm853 PE=2 SV=1 - [Q3UNZ2_MOUSE]                                                   | 1.88  | 1 | 1  | 1  | 1   | 1.004 | 1.031 | 0.819 | 0.795 | 0.00   | 1.88  | 1  | 1   | 425  | 46.5  | 6.64  |
| Q3UKU4   | Protein FAM83F OS=Mus musculus GN=Fam83f PE=1 SV=1 - [FAM83F_MOUSE]                                                          | 6.26  | 1 | 3  | 3  | 3   | 1.012 | 2.857 | 2.417 | 0.795 | 3.03   | 6.26  | 3  | 3   | 495  | 55.0  | 8.78  |
| Q9DB38   | Zinc finger protein 580 OS=Mus musculus GN=Znf580 PE=2 SV=1 - [ZNF580_MOUSE]                                                 | 10.47 | 1 | 1  | 1  | 1   | 1.048 | 1.059 | 0.859 | 0.795 | 2.44   | 10.47 | 1  | 1   | 172  | 18.8  | 10.08 |
| D3Z6G3   | Microtubule-associated protein RP/EB family member 3 OS=Mus musculus GN=Mapre3 PE=2 SV=1 - [MAPRE3_MOUSE]                    | 39.47 | 2 | 1  | 13 | 100 | 1.132 | 0.673 | 0.642 | 0.795 | 273.62 | 39.47 | 24 | 100 | 266  | 30.3  | 5.30  |
| P14576   | Signal recognition particle 54 kDa protein OS=Mus musculus GN=Srp54 PE=1 SV=2 - [SRP54_MOUSE]                                | 39.09 | 3 | 16 | 16 | 52  | 0.655 | 0.805 | 0.706 | 0.795 | 181.35 | 39.09 | 28 | 52  | 504  | 55.7  | 8.75  |
| O54988-2 | Isoform 2 of STE20-like serine/threonine-protein kinase OS=Mus musculus GN=Slk - [SLK_MOUSE]                                 | 31.86 | 3 | 30 | 32 | 134 | 0.905 | 0.879 | 1.285 | 0.795 | 342.07 | 31.86 | 57 | 134 | 1202 | 137.6 | 5.08  |
| D3Z285   | NFU1 iron-sulfur cluster scaffold homolog, mitochondrial (Fragment) OS=Mus musculus GN=Nfu1 PE=2 SV=1 - [NFU1_MOUSE]         | 28.64 | 1 | 1  | 5  | 43  | 1.323 | 0.884 | 1.091 | 0.795 | 123.05 | 28.64 | 8  | 43  | 199  | 22.0  | 4.96  |
| D6RDE5   | DNA-binding protein Rfx5 OS=Mus musculus GN=Rfx5 PE=4 SV=1 - [D6RDE5_MOUSE]                                                  | 48.78 | 8 | 1  | 1  | 3   | 3.283 | 1.123 | 0.902 | 0.795 | 13.03  | 48.78 | 2  | 3   | 41   | 4.4   | 9.99  |
| B1ATC3   | Trinucleotide repeat-containing gene 6C protein OS=Mus musculus GN=Trirc6c PE=4 SV=1 - [B1ATC3_MOUSE]                        | 6.74  | 3 | 7  | 7  | 17  | 1.518 | 1.029 | 0.883 | 0.795 | 43.89  | 6.74  | 11 | 17  | 1900 | 198.1 | 7.17  |
| Q922H4   | Mannose-1-phosphate guanylyltransferase alpha OS=Mus musculus GN=Gmppa PE=2 SV=1 - [GMPPA_MOUSE]                             | 28.33 | 8 | 9  | 9  | 21  | 0.550 | 0.891 | 0.793 | 0.795 | 53.87  | 28.33 | 14 | 21  | 420  | 46.2  | 7.62  |
| P70670   | Nascent polypeptide-associated complex subunit alpha, muscle-specific form OS=Mus musculus GN=Naca PE=1 SV=2 - [NACAM_MOUSE] | 6.45  | 2 | 10 | 10 | 43  | 1.386 | 0.738 | 0.971 | 0.795 | 115.62 | 6.45  | 14 | 43  | 2187 | 220.4 | 9.35  |
| Q9DCC8   | Mitochondrial import receptor subunit TOM20 homolog OS=Mus musculus GN=Tomm20 PE=1 SV=1 - [TOMM20_MOUSE]                     | 18.62 | 1 | 2  | 2  | 7   | 0.985 | 0.613 | 0.955 | 0.796 | 21.66  | 18.62 | 3  | 7   | 145  | 16.3  | 8.60  |
| Q60900-2 | Isoform HuC-S of ELAV-like protein 3 OS=Mus musculus GN=Elavl3 - [ELAV3_MOUSE]                                               | 44.72 | 2 | 9  | 15 | 74  | 0.867 | 0.663 | 0.828 | 0.796 | 209.00 | 44.72 | 27 | 74  | 360  | 38.8  | 9.28  |
| Q80X82   | Sympkin OS=Mus musculus GN=Sympk PE=1 SV=1 - [SYMPK_MOUSE]                                                                   | 15.73 | 4 | 15 | 15 | 33  | 0.654 | 0.946 | 0.795 | 0.796 | 96.83  | 15.73 | 22 | 33  | 1284 | 142.2 | 6.05  |
| Q99KK7   | Dipeptidyl peptidase 3 OS=Mus musculus GN=Dpp3 PE=2 SV=2 - [DPP3_MOUSE]                                                      | 56.78 | 1 | 30 | 32 | 105 | 0.625 | 0.887 | 0.781 | 0.796 | 331.07 | 56.78 | 52 | 105 | 738  | 82.8  | 5.38  |
| Q5HZK2   | Neurensin-2 OS=Mus musculus GN=Nrsn2 PE=2 SV=1 - [NRSN2_MOUSE]                                                               | 17.33 | 1 | 1  | 1  | 2   | 1.329 | 0.951 | 1.924 | 0.796 | 0.00   | 17.33 | 1  | 2   | 202  | 22.4  | 4.77  |
| Q9CZH3   | Proteasome assembly chaperone 3 OS=Mus musculus GN=Psmg3 PE=1 SV=1 - [PSMG3_MOUSE]                                           | 22.95 | 1 | 2  | 2  | 4   | 1.405 | 1.083 | 0.696 | 0.796 | 15.26  | 22.95 | 4  | 4   | 122  | 13.3  | 8.66  |
| Q91XU0   | ATPase WRNP1 OS=Mus musculus GN=Wrip1 PE=1 SV=2 - [WRIP1_MOUSE]                                                              | 23.48 | 2 | 14 | 14 | 26  | 0.613 | 0.808 | 0.736 | 0.796 | 64.22  | 23.48 | 21 | 26  | 660  | 71.7  | 6.18  |
| D3YXP6   | Phosphomevalonate kinase OS=Mus musculus GN=Pmk PE=2 SV=1 - [D3YXP6_MOUSE]                                                   | 15.82 | 4 | 3  | 3  | 7   | 0.663 | 0.618 | 0.635 | 0.796 | 13.14  | 15.82 | 5  | 7   | 158  | 17.9  | 9.86  |
| Q9D1Q6   | Endoplasmic reticulum resident protein 44 OS=Mus musculus GN=Erp44 PE=1 SV=1 - [ERP44_MOUSE]                                 | 50.00 | 1 | 15 | 17 | 86  | 1.413 | 0.820 | 0.710 | 0.796 | 250.08 | 50.00 | 29 | 86  | 406  | 46.8  | 5.27  |
| Q921W0   | Charged multivesicular body protein 1a OS=Mus musculus GN=Chmp1a PE=1 SV=1 - [CHMP1A_MOUSE]                                  | 23.47 | 1 | 6  | 6  | 25  | 1.275 | 0.748 | 1.244 | 0.797 | 68.24  | 23.47 | 11 | 25  | 196  | 21.6  | 8.06  |
| F7DEU6   | Inosine 5'-monophosphate dehydrogenase (Fragment) OS=Mus musculus GN=Impdh1 PE=2 SV=1 - [F7DEU6_MOUSE]                       | 18.84 | 5 | 7  | 10 | 30  | 1.267 | 1.138 | 0.945 | 0.797 | 106.46 | 18.84 | 16 | 30  | 568  | 60.8  | 7.59  |
| Q3UMR0-3 | Isoform 3 of Ankyrin repeat domain-containing protein 27 OS=Mus musculus GN=Ankrd27 - [ANRD27_MOUSE]                         | 5.86  | 3 | 6  | 6  | 10  | 1.400 | 1.111 | 0.961 | 0.797 | 19.84  | 5.86  | 9  | 10  | 1007 | 112.3 | 6.65  |



|          |                                                                                                                        |       |    |    |    |     |       |       |       |       |        |       |    |     |      |       |       |
|----------|------------------------------------------------------------------------------------------------------------------------|-------|----|----|----|-----|-------|-------|-------|-------|--------|-------|----|-----|------|-------|-------|
| Q91296   | BMP-2-inducible protein kinase OS=Mus musculus GN=Bmp2k PE=1 SV=1 - [BMP2K_MOUSE]                                      | 5.89  | 2  | 4  | 6  | 10  | 1.130 | 0.724 | 0.890 | 0.797 | 24.18  | 5.89  | 9  | 10  | 1138 | 126.1 | 6.80  |
| Q5RKR3   | Immunoglobulin superfamily containing leucine-rich repeat protein 2 OS=Mus musculus GN=Islr2 PE=1 SV=1 - [ISLR2_MOUSE] | 16.11 | 2  | 9  | 10 | 27  | 1.064 | 1.066 | 1.017 | 0.797 | 59.76  | 16.11 | 14 | 27  | 745  | 79.7  | 5.49  |
| Q920A5   | Retinoid-inducible serine carboxypeptidase OS=Mus musculus GN=Scpep1 PE=2 SV=2 - [RISC_MOUSE]                          | 8.19  | 1  | 4  | 4  | 9   | 1.671 | 1.132 | 0.720 | 0.797 | 23.86  | 8.19  | 6  | 9   | 452  | 50.9  | 5.66  |
| O55187-2 | Isoform 2 of E3 SUMO-protein ligase CBX4 OS=Mus musculus GN=Cbx4 -                                                     | 4.74  | 2  | 1  | 1  | 2   | 0.827 | 1.088 | 1.398 | 0.797 | 0.00   | 4.74  | 1  | 2   | 485  | 52.5  | 9.35  |
| Q9JK48-2 | Isoform 2 of Endophilin-B1 OS=Mus musculus GN=Sh3glb1 - [SHLB1_MOUSE]                                                  | 30.57 | 2  | 10 | 11 | 54  | 1.188 | 1.235 | 1.063 | 0.797 | 142.68 | 30.57 | 20 | 54  | 386  | 43.2  | 5.68  |
| Q3UU56   | General transcription factor 3C polypeptide 2 OS=Mus musculus GN=Gtf3c2 PE=2 SV=1 - [Q3UU56_MOUSE]                     | 4.96  | 5  | 3  | 3  | 4   | 0.694 | 0.522 | 1.312 | 0.797 | 10.97  | 4.96  | 4  | 4   | 907  | 100.2 | 6.76  |
| Q5SS00   | DBF4-type zinc finger-containing protein 2 homolog OS=Mus musculus GN=Zdbf2 PE=2 SV=1 - [ZDBF2_MOUSE]                  | 7.94  | 2  | 16 | 16 | 35  | 1.272 | 1.029 | 0.639 | 0.797 | 85.00  | 7.94  | 25 | 35  | 2493 | 273.6 | 5.22  |
| Q6PDM2-3 | Isoform 3 of Serine/arginine-rich splicing factor 1 OS=Mus musculus GN=Srsf1 -                                         | 46.94 | 6  | 10 | 10 | 126 | 1.053 | 0.738 | 0.874 | 0.797 | 391.89 | 46.94 | 19 | 126 | 196  | 21.8  | 8.69  |
| E0CXE3   | Contactin-6 OS=Mus musculus GN=Cntn6 PE=2 SV=1 - [E0CXE3_MOUSE]                                                        | 18.41 | 3  | 13 | 13 | 33  | 0.946 | 0.918 | 0.714 | 0.797 | 96.23  | 18.41 | 23 | 33  | 956  | 105.5 | 6.58  |
| P45878   | Peptidyl-prolyl cis-trans isomerase FKBP2 OS=Mus musculus GN=Fkbp2 PE=1 SV=1 - [FKBP2_MOUSE]                           | 49.29 | 1  | 9  | 9  | 37  | 1.643 | 0.846 | 1.003 | 0.798 | 115.28 | 49.29 | 16 | 37  | 140  | 15.3  | 8.88  |
| P25444   | 40S ribosomal protein S2 OS=Mus musculus GN=Rps2 PE=1 SV=3 - [RS2_MOUSE]                                               | 62.46 | 11 | 20 | 20 | 91  | 0.552 | 0.665 | 0.729 | 0.798 | 234.50 | 62.46 | 34 | 91  | 293  | 31.2  | 10.24 |
| E9PV44   | ATPase inhibitor, mitochondrial OS=Mus musculus GN=Atpif1 PE=2 SV=1 - [E9PV44_MOUSE]                                   | 48.65 | 2  | 8  | 8  | 60  | 1.816 | 0.786 | 1.158 | 0.798 | 125.05 | 48.65 | 13 | 60  | 74   | 8.8   | 9.31  |
| B0F2B4   | Neuroigin 4-like OS=Mus musculus GN=Nlgn4l PE=1 SV=1 - [NLGN4_MOUSE]                                                   | 18.10 | 1  | 7  | 9  | 22  | 0.760 | 1.004 | 1.015 | 0.798 | 70.19  | 18.10 | 13 | 22  | 945  | 97.3  | 6.32  |
| P62983   | Ubiquitin-40S ribosomal protein S27a OS=Mus musculus GN=Rps27a PE=1 SV=2 - [RS27A_MOUSE]                               | 66.67 | 7  | 2  | 13 | 387 | 0.843 | 1.036 | 0.790 | 0.798 | 945.85 | 66.67 | 25 | 387 | 156  | 17.9  | 9.64  |
| Q9D1R9   | 60S ribosomal protein L34 OS=Mus musculus GN=Rpl34 PE=3 SV=2 - [RL34_MOUSE]                                            | 38.46 | 2  | 7  | 7  | 34  | 0.475 | 0.655 | 0.731 | 0.798 | 94.87  | 38.46 | 14 | 34  | 117  | 13.3  | 11.47 |
| Q9EST5-2 | Isoform 2 of Acidic leucine-rich nuclear phosphoprotein 32 family member B OS=Mus musculus GN=Anp32b - [ANP32B_MOUSE]  | 24.92 | 2  | 5  | 9  | 57  | 1.261 | 1.274 | 0.748 | 0.798 | 157.98 | 24.92 | 15 | 57  | 329  | 37.4  | 4.18  |
| Q8K0V2   | DCN1-like protein 3 OS=Mus musculus GN=Dcn1d3 PE=2 SV=1 - [DCNL3_MOUSE]                                                | 25.66 | 3  | 6  | 6  | 7   | 2.288 | 1.308 | 0.954 | 0.798 | 19.59  | 25.66 | 7  | 7   | 304  | 34.4  | 5.12  |
| Q6PGH0   | Ubiquitin domain-containing protein 2 OS=Mus musculus GN=Ubt2 PE=2 SV=1 -                                              | 32.91 | 2  | 7  | 7  | 26  | 1.320 | 0.859 | 1.028 | 0.798 | 68.41  | 32.91 | 12 | 26  | 234  | 26.1  | 5.83  |
| Q7J113-2 | Isoform 2 of Bromodomain containing protein 2 OS=Mus musculus GN=Brd2 - [BRD2_MOUSE]                                   | 10.24 | 3  | 6  | 8  | 14  | 0.676 | 0.920 | 0.792 | 0.798 | 32.78  | 10.24 | 11 | 14  | 752  | 83.2  | 9.11  |
| P61620   | Protein transport protein Sec61 subunit alpha isoform 1 OS=Mus musculus GN=Sec61a1 PE=2 SV=2 - [SEC61A1_MOUSE]         | 13.87 | 2  | 4  | 7  | 27  | 0.797 | 0.982 | 0.677 | 0.798 | 64.80  | 13.87 | 13 | 27  | 476  | 52.2  | 8.06  |
| Q9EQW6   | Oligodendrocyte transcription factor 2 OS=Mus musculus GN=Olig2 PE=1 SV=1 -                                            | 5.88  | 1  | 1  | 1  | 3   | 1.100 | 0.247 | 0.775 | 0.799 | 8.61   | 5.88  | 2  | 3   | 323  | 32.4  | 9.13  |
| Q9CX66   | Uncharacterized protein C12orf45 homolog OS=Mus musculus GN=D10Wsu102e PE=2 SV=1 - [CL045_MOUSE]                       | 11.35 | 1  | 2  | 2  | 3   | 1.422 | 0.852 | 1.026 | 0.799 | 8.62   | 11.35 | 3  | 3   | 185  | 20.0  | 4.84  |
| Q7TNC4-2 | Isoform 2 of Putative RNA-binding protein Luc7-like 2 OS=Mus musculus GN=Luc7l2 - [LC7L2_MOUSE]                        | 27.08 | 7  | 5  | 8  | 36  | 0.796 | 0.927 | 0.778 | 0.799 | 95.39  | 27.08 | 15 | 36  | 325  | 38.6  | 9.91  |
| Q7TNB5   | Glutamate receptor 1 OS=Mus musculus GN=Gria1 PE=2 SV=1 - [Q7TNB5_MOUSE]                                               | 34.29 | 1  | 1  | 28 | 122 | 0.526 | 1.775 | 0.942 | 0.799 | 337.23 | 34.29 | 53 | 122 | 907  | 101.5 | 7.53  |

|          |                                                                                                       |       |    |    |    |     |       |       |       |       |        |       |    |     |      |       |      |
|----------|-------------------------------------------------------------------------------------------------------|-------|----|----|----|-----|-------|-------|-------|-------|--------|-------|----|-----|------|-------|------|
| Q9CZ00-2 | Isoform 2 of Dysbindin domain-containing protein 1 OS=Mus musculus GN=Dbdd1 - [DBND1_MOUSE]           | 65.49 | 8  | 4  | 4  | 14  | 2.139 | 0.737 | 0.872 | 0.799 | 49.00  | 65.49 | 5  | 14  | 113  | 12.5  | 4.91 |
| Q925F2   | Endothelial cell-selective adhesion molecule OS=Mus musculus GN=Esam PE=1 SV=1 - [ESAM_MOUSE]         | 16.50 | 2  | 4  | 4  | 8   | 1.050 | 1.057 | 0.854 | 0.799 | 23.31  | 16.50 | 8  | 8   | 394  | 41.8  | 9.26 |
| Q8BV13   | COP9 signalosome complex subunit 7b OS=Mus musculus GN=Cops7b PE=1 SV=1 -                             | 23.11 | 1  | 4  | 4  | 14  | 1.096 | 0.949 | 0.957 | 0.799 | 52.85  | 23.11 | 5  | 14  | 264  | 29.7  | 6.32 |
| P26043   | Radixin OS=Mus musculus GN=Rdx PE=1 SV=3 - [RADX_MOUSE]                                               | 42.54 | 2  | 19 | 29 | 149 | 1.214 | 0.377 | 0.773 | 0.799 | 392.54 | 42.54 | 53 | 149 | 583  | 68.5  | 6.20 |
| Q3V038   | Tetratricopeptide repeat protein 9A OS=Mus musculus GN=Ttc9 PE=2 SV=1 - [TTC9A_MOUSE]                 | 51.14 | 1  | 9  | 10 | 37  | 1.664 | 0.548 | 0.845 | 0.799 | 102.59 | 51.14 | 19 | 37  | 219  | 24.3  | 8.85 |
| Q62018   | RNA polymerase-associated protein CTR9 homolog OS=Mus musculus GN=Ctr9 PE=1 SV=2 - [CTR9_MOUSE]       | 2.39  | 9  | 2  | 3  | 9   | 0.733 | 1.270 | 0.935 | 0.799 | 14.35  | 2.39  | 5  | 9   | 1173 | 133.3 | 6.49 |
| P29351   | Tyrosine-protein phosphatase non-receptor type 6 OS=Mus musculus GN=Ptpn6 PE=1 SV=2 - [PTN6_MOUSE]    | 13.95 | 3  | 7  | 7  | 15  | 1.214 | 0.979 | 0.716 | 0.800 | 35.18  | 13.95 | 11 | 15  | 595  | 67.5  | 7.81 |
| F6W8T3   | E3 ubiquitin-protein ligase MARCH5 (Fragment) OS=Mus musculus GN=March5 PE=4 SV=1 - [F6W8T3_MOUSE]    | 12.30 | 1  | 1  | 1  | 1   | 2.100 | 1.487 | 1.193 | 0.800 | 2.89   | 12.30 | 1  | 1   | 187  | 20.9  | 9.35 |
| A2API3   | Integrator complex subunit 8 OS=Mus musculus GN=Ints8 PE=2 SV=1 - [A2API3_MOUSE]                      | 2.04  | 2  | 1  | 1  | 2   | 1.715 | 1.229 | 0.947 | 0.800 | 2.58   | 2.04  | 1  | 2   | 978  | 111.3 | 6.71 |
| O55047-2 | Isoform 2 of Serine/threonine-protein kinase tousled-like 2 OS=Mus musculus GN=Tlk2 - [TLK2_MOUSE]    | 11.91 | 12 | 4  | 8  | 17  | 1.089 | 0.748 | 0.889 | 0.800 | 42.95  | 11.91 | 14 | 17  | 697  | 79.6  | 8.57 |
| Q9D1Z3   | Protein FAM173B OS=Mus musculus GN=Fam173b PE=2 SV=1 - [F173B_MOUSE]                                  | 9.31  | 1  | 1  | 2  | 4   | 1.061 | 0.482 | 0.716 | 0.800 | 8.36   | 9.31  | 3  | 4   | 247  | 27.4  | 8.75 |
| Q8K4Z5   | Splicing factor 3A subunit 1 OS=Mus musculus GN=SF3a1 PE=1 SV=1 - [SF3A1_MOUSE]                       | 36.41 | 1  | 24 | 25 | 100 | 1.257 | 0.997 | 0.907 | 0.800 | 282.79 | 36.41 | 44 | 100 | 791  | 88.5  | 5.22 |
| P09925   | Surfeit locus protein 1 OS=Mus musculus GN=Surf1 PE=2 SV=3 - [SURF1_MOUSE]                            | 17.32 | 2  | 4  | 4  | 16  | 0.863 | 0.896 | 0.760 | 0.800 | 38.47  | 17.32 | 7  | 16  | 306  | 34.8  | 9.72 |
| Q91YP2   | Neurolysin, mitochondrial OS=Mus musculus GN=Nlin PE=2 SV=1 - [NEUL_MOUSE]                            | 39.63 | 1  | 26 | 26 | 71  | 1.179 | 0.964 | 0.849 | 0.800 | 208.12 | 39.63 | 41 | 71  | 704  | 80.4  | 6.44 |
| Q5DTM8   | E3 ubiquitin-protein ligase BRE1A OS=Mus musculus GN=Rnf20 PE=1 SV=2 - [BRE1A_MOUSE]                  | 14.39 | 7  | 12 | 12 | 35  | 1.202 | 0.708 | 1.021 | 0.800 | 91.33  | 14.39 | 20 | 35  | 973  | 113.5 | 5.96 |
| Q8C8U0   | Liprin-beta-1 OS=Mus musculus GN=Ppfbp1 PE=1 SV=3 - [LIPB1_MOUSE]                                     | 8.67  | 4  | 6  | 7  | 14  | 1.207 | 1.015 | 0.815 | 0.801 | 39.83  | 8.67  | 12 | 14  | 969  | 108.5 | 5.49 |
| Q91ZV7   | Plexin domain-containing protein 1 OS=Mus musculus GN=Pxdc1 PE=1 SV=2 -                               | 4.00  | 3  | 2  | 2  | 4   | 0.555 | 0.749 | 0.761 | 0.801 | 11.64  | 4.00  | 3  | 4   | 500  | 55.6  | 6.62 |
| Q8BU14   | Translocation protein SEC62 OS=Mus musculus GN=Sec62 PE=1 SV=1 - [SEC62_MOUSE]                        | 11.06 | 1  | 4  | 4  | 14  | 1.300 | 0.583 | 0.765 | 0.801 | 26.44  | 11.06 | 8  | 14  | 398  | 45.6  | 7.31 |
| Q91XX4   | MCG133388, isoform CRA_n OS=Mus musculus GN=Pcdhg6 PE=2 SV=1 - [Q91XX4_MOUSE]                         | 5.27  | 1  | 2  | 4  | 22  | 1.387 | 0.985 | 0.817 | 0.801 | 56.75  | 5.27  | 7  | 22  | 930  | 100.6 | 5.34 |
| P08414   | Calcium/calmodulin-dependent protein kinase type IV OS=Mus musculus GN=Camk4 PE=1 SV=2 - [KCC4_MOUSE] | 35.39 | 2  | 14 | 15 | 51  | 0.565 | 1.121 | 1.570 | 0.801 | 161.54 | 35.39 | 24 | 51  | 469  | 52.6  | 4.93 |
| O08600   | Endonuclease G, mitochondrial OS=Mus musculus GN=Endog PE=2 SV=1 - [NUCG_MOUSE]                       | 26.19 | 1  | 7  | 7  | 16  | 1.149 | 0.441 | 0.787 | 0.801 | 41.39  | 26.19 | 11 | 16  | 294  | 32.2  | 9.54 |
| Q6V455   | Protein sidekick-2 OS=Mus musculus GN=Sdk2 PE=2 SV=1 - [SDK2_MOUSE]                                   | 16.59 | 3  | 18 | 29 | 64  | 0.727 | 0.590 | 0.692 | 0.801 | 179.34 | 16.59 | 46 | 64  | 2176 | 239.8 | 7.36 |
| D3Z4U5   | Janus kinase and microtubule-interacting protein 1 OS=Mus musculus GN=Jakmip1 PE=2 SV=1 -             | 27.32 | 6  | 2  | 21 | 76  | 0.462 | 0.814 | 0.885 | 0.801 | 209.56 | 27.32 | 36 | 76  | 831  | 97.2  | 5.80 |
| Q69ZS0-2 | Isoform 2 of E3 ubiquitin-protein ligase PDZRN3 OS=Mus musculus GN=Pdzrn3 -                           | 4.75  | 4  | 3  | 4  | 7   | 0.854 | 2.243 | 1.524 | 0.801 | 15.02  | 4.75  | 6  | 7   | 1011 | 113.5 | 5.83 |
| Q60902-4 | Isoform 4 of Epidermal growth factor receptor substrate 15-like 1 OS=Mus musculus GN=Eps15l1 -        | 63.70 | 1  | 1  | 43 | 251 | 1.345 | 1.288 | 1.087 | 0.802 | 721.92 | 63.70 | 74 | 251 | 763  | 84.7  | 5.02 |

|          |                                                                                                        |       |    |    |    |     |       |       |       |       |        |       |    |     |      |       |       |
|----------|--------------------------------------------------------------------------------------------------------|-------|----|----|----|-----|-------|-------|-------|-------|--------|-------|----|-----|------|-------|-------|
| Q6NZNO-5 | Isoform 5 of RNA-binding protein 26 OS=Mus musculus GN=Rbm26 - [RBM26_MOUSE]                           | 21.33 | 8  | 18 | 19 | 39  | 1.296 | 0.748 | 0.916 | 0.802 | 108.35 | 21.33 | 27 | 39  | 989  | 111.2 | 9.44  |
| Q9D8X2   | Coiled-coil domain-containing protein 124 OS=Mus musculus GN=Ccdc124 PE=2 SV=1 - [CC124_MOUSE]         | 34.56 | 1  | 6  | 8  | 34  | 1.809 | 0.662 | 1.202 | 0.802 | 89.56  | 34.56 | 13 | 34  | 217  | 25.3  | 9.64  |
| Q8K2H2   | OTU domain-containing protein 6B OS=Mus musculus GN=Otud6b PE=2 SV=1 -                                 | 35.37 | 3  | 6  | 7  | 20  | 1.072 | 0.475 | 1.011 | 0.802 | 64.88  | 35.37 | 12 | 20  | 294  | 33.7  | 5.53  |
| Q02496   | Mucin-1 OS=Mus musculus GN=Muc1 PE=1 SV=2 - [MUC1_MOUSE]                                               | 2.38  | 1  | 1  | 1  | 1   | 1.766 | 0.912 | 0.870 | 0.802 | 2.88   | 2.38  | 1  | 1   | 630  | 64.5  | 5.67  |
| O70250   | Phosphoglycerate mutase 2 OS=Mus musculus GN=Pgam2 PE=1 SV=3 - [PGAM2_MOUSE]                           | 50.59 | 1  | 7  | 12 | 204 | 2.247 | 2.290 | 0.896 | 0.802 | 662.26 | 50.59 | 23 | 204 | 253  | 28.8  | 8.50  |
| P02802   | Metallothionein-1 OS=Mus musculus GN=Mt1 PE=1 SV=1 - [MT1_MOUSE]                                       | 13.11 | 1  | 1  | 1  | 2   | 1.471 | 0.996 | 1.053 | 0.802 | 7.64   | 13.11 | 1  | 2   | 61   | 6.0   | 7.96  |
| Q9DB34   | Charged multivesicular body protein 2a OS=Mus musculus GN=Chmp2a PE=1 SV=1 -                           | 25.23 | 5  | 7  | 8  | 28  | 0.754 | 0.868 | 0.835 | 0.802 | 70.78  | 25.23 | 14 | 28  | 222  | 25.1  | 5.97  |
| O08796   | Eukaryotic elongation factor 2 kinase OS=Mus musculus GN=Eef2k PE=1 SV=1 - [EF2K_MOUSE]                | 4.70  | 2  | 3  | 4  | 7   | 0.947 | 1.164 | 0.729 | 0.802 | 15.90  | 4.70  | 6  | 7   | 724  | 81.7  | 5.38  |
| P52483   | Ubiquitin-conjugating enzyme E2 E3 OS=Mus musculus GN=Ube2e3 PE=1 SV=2 -                               | 30.92 | 6  | 3  | 4  | 11  | 0.624 | 0.785 | 0.814 | 0.803 | 26.86  | 30.92 | 7  | 11  | 207  | 22.9  | 7.18  |
| D3YUE3   | Lysine-specific demethylase 2B (Fragment) OS=Mus musculus GN=Kdm2b PE=2 SV=1 -                         | 1.17  | 6  | 1  | 1  | 1   | 0.744 | 1.026 | 0.876 | 0.803 | 2.06   | 1.17  | 1  | 1   | 514  | 59.7  | 5.06  |
| P63242   | Eukaryotic translation initiation factor 5A-1 OS=Mus musculus GN=Elf5a PE=1 SV=2 - [IF5A1_MOUSE]       | 68.83 | 2  | 5  | 11 | 173 | 1.487 | 0.844 | 1.170 | 0.803 | 539.74 | 68.83 | 21 | 173 | 154  | 16.8  | 5.24  |
| Q6ZVZ6   | 40S ribosomal protein S12 OS=Mus musculus GN=Rps12 PE=2 SV=1 - [Q6ZVZ6_MOUSE]                          | 53.79 | 2  | 6  | 6  | 65  | 1.224 | 0.777 | 0.971 | 0.803 | 191.51 | 53.79 | 11 | 65  | 132  | 14.5  | 7.21  |
| Q9D0Y8-2 | Isoform 2 of 39S ribosomal protein L52, mitochondrial OS=Mus musculus GN=Mrp152 - [RMS2_MOUSE]         | 11.11 | 2  | 1  | 1  | 1   | 1.079 | 0.837 | 0.960 | 0.803 | 0.00   | 11.11 | 1  | 1   | 63   | 7.5   | 11.03 |
| Q3U6Q4-3 | Isoform 3 of Phosphoinositide 3-kinase regulatory subunit 6 OS=Mus musculus GN=PIK3r5 - [PIK3R5_MOUSE] | 6.56  | 3  | 1  | 1  | 12  | 1.421 | 1.629 | 0.853 | 0.803 | 0.00   | 6.56  | 1  | 12  | 305  | 34.3  | 7.44  |
| O88693   | Ceramide glucosyltransferase OS=Mus musculus GN=Ugcg PE=2 SV=1 -                                       | 4.31  | 1  | 2  | 2  | 3   | 1.742 | 0.589 | 1.517 | 0.803 | 2.33   | 4.31  | 2  | 3   | 394  | 44.8  | 7.80  |
| Q8VE97   | Serine/arginine-rich splicing factor 4 OS=Mus musculus GN=Srsf4 PE=2 SV=1 - [SRSF4_MOUSE]              | 13.91 | 3  | 6  | 8  | 31  | 0.920 | 0.795 | 0.897 | 0.803 | 77.20  | 13.91 | 13 | 31  | 489  | 55.9  | 11.40 |
| E9QNK8   | Kv channel-interacting protein 2 OS=Mus musculus GN=Kcnp2 PE=2 SV=1 -                                  | 27.78 | 11 | 2  | 5  | 13  | 1.909 | 2.093 | 1.538 | 0.803 | 38.29  | 27.78 | 8  | 13  | 252  | 29.0  | 4.91  |
| A2AKA9   | Bromodomain-containing protein 3 (Fragment) OS=Mus musculus GN=Brd3 PE=4 SV=1 - [A2AKA9_MOUSE]         | 9.68  | 3  | 4  | 6  | 17  | 0.582 | 0.785 | 0.718 | 0.803 | 39.54  | 9.68  | 10 | 17  | 682  | 75.3  | 9.29  |
| Q05DI3   | Stathmin OS=Mus musculus GN=Stmn4 PE=2 SV=1 - [Q05DI3_MOUSE]                                           | 11.36 | 4  | 2  | 2  | 10  | 1.463 | 0.843 | 0.794 | 0.803 | 16.22  | 11.36 | 4  | 10  | 176  | 20.4  | 5.73  |
| Q80YP0   | Cyclin-dependent kinase 3 OS=Mus musculus GN=Cdk3 PE=1 SV=2 - [CDK3_MOUSE]                             | 6.93  | 15 | 1  | 2  | 22  | 1.445 | 0.956 | 0.953 | 0.803 | 40.43  | 6.93  | 3  | 22  | 303  | 33.9  | 9.00  |
| Q9DBG9   | Tax1-binding protein 3 OS=Mus musculus GN=Tax1bp3 PE=1 SV=1 - [TX1B3_MOUSE]                            | 28.23 | 1  | 2  | 2  | 4   | 2.243 | 1.105 | 0.858 | 0.804 | 13.32  | 28.23 | 3  | 4   | 124  | 13.7  | 8.48  |
| E9QKY7   | Transcription factor 20 OS=Mus musculus GN=Tcf20 PE=2 SV=1 - [E9QKY7_MOUSE]                            | 16.13 | 4  | 19 | 20 | 61  | 0.997 | 0.891 | 1.321 | 0.804 | 172.00 | 16.13 | 31 | 61  | 1965 | 213.4 | 9.03  |
| Q80WW9   | DDRCK domain-containing protein 1 OS=Mus musculus GN=Ddrgk1 PE=1 SV=2 -                                | 9.84  | 1  | 2  | 2  | 4   | 0.632 | 0.662 | 0.740 | 0.804 | 14.12  | 9.84  | 4  | 4   | 315  | 36.0  | 5.35  |
| F8WI14   | Extracellular matrix protein 1 OS=Mus musculus GN=Ecm1 PE=2 SV=1 - [F8WI14_MOUSE]                      | 7.89  | 8  | 4  | 4  | 7   | 1.820 | 1.267 | 1.103 | 0.804 | 19.85  | 7.89  | 7  | 7   | 558  | 62.7  | 6.89  |
| Q8K114-2 | Isoform 2 of Integrator complex subunit 9 OS=Mus musculus GN=Ints9 -                                   | 2.08  | 2  | 1  | 1  | 2   | 0.485 | 0.781 | 0.885 | 0.804 | 7.98   | 2.08  | 2  | 2   | 576  | 64.7  | 6.84  |

|          |                                                                                                                    |       |    |    |    |     |       |       |       |       |        |       |    |     |      |       |       |
|----------|--------------------------------------------------------------------------------------------------------------------|-------|----|----|----|-----|-------|-------|-------|-------|--------|-------|----|-----|------|-------|-------|
| Q9DAW6   | U4/U6 small nuclear ribonucleoprotein Prp4 OS=Mus musculus GN=Prp4 PE=2 SV=1 - [PRP4_MOUSE]                        | 18.81 | 1  | 7  | 7  | 21  | 0.952 | 0.818 | 0.720 | 0.804 | 80.68  | 18.81 | 12 | 21  | 521  | 58.3  | 7.28  |
| Q7M6Y3-5 | Isoform 5 of Phosphatidylinositol-binding clathrin assembly protein OS=Mus musculus GN=Picalm - [PICALM_MOUSE]     | 33.44 | 3  | 1  | 17 | 122 | 0.765 | 1.007 | 1.131 | 0.804 | 311.81 | 33.44 | 29 | 122 | 655  | 70.9  | 8.37  |
| Q9QXK7   | Cleavage and polyadenylation specificity factor subunit 3 OS=Mus musculus GN=Cpsf3 PE=1 SV=2 - [CPSF3_MOUSE]       | 11.70 | 1  | 7  | 8  | 15  | 0.579 | 0.916 | 0.691 | 0.804 | 40.98  | 11.70 | 13 | 15  | 684  | 77.5  | 5.60  |
| P10639   | Thioredoxin OS=Mus musculus GN=Txn PE=1 SV=3 - [THIO_MOUSE]                                                        | 65.71 | 1  | 8  | 8  | 106 | 1.750 | 0.882 | 0.984 | 0.804 | 245.63 | 65.71 | 14 | 106 | 105  | 11.7  | 4.92  |
| Q9Z2L6   | Multiple inositol polyphosphate phosphatase 1 OS=Mus musculus GN=Minpp1 PE=1 SV=3 - [MINPP1_MOUSE]                 | 18.50 | 1  | 8  | 8  | 14  | 1.529 | 0.895 | 0.734 | 0.805 | 37.91  | 18.50 | 12 | 14  | 481  | 54.5  | 7.49  |
| Q80VM8   | PNMA-like protein 1 OS=Mus musculus GN=Pnmal1 PE=2 SV=1 - [PNML1_MOUSE]                                            | 8.60  | 1  | 2  | 2  | 2   | 2.584 | 1.067 | 1.369 | 0.805 | 4.60   | 8.60  | 2  | 2   | 430  | 48.0  | 9.45  |
| P01820   | Ig heavy chain V region P114 OS=Mus musculus PE=1 SV=1 - [HVM44_MOUSE]                                             | 5.22  | 2  | 1  | 1  | 1   | 0.982 | 1.033 | 0.750 | 0.805 | 1.97   | 5.22  | 1  | 1   | 115  | 12.4  | 8.16  |
| Q6PIX5   | Inactive rhomboid protein 1 OS=Mus musculus GN=Rhbdf1 PE=1 SV=2 - [RHDF1_MOUSE]                                    | 6.89  | 5  | 4  | 4  | 8   | 1.437 | 0.694 | 1.006 | 0.805 | 23.55  | 6.89  | 7  | 8   | 856  | 97.2  | 8.59  |
| O08795-2 | Isoform 2 of Glucosidase 2 subunit beta OS=Mus musculus GN=Prkcsb - [GLU2B_MOUSE]                                  | 28.03 | 2  | 14 | 14 | 132 | 1.854 | 0.965 | 1.113 | 0.805 | 380.92 | 28.03 | 26 | 132 | 528  | 59.5  | 4.48  |
| Q6PIU9   | Uncharacterized protein FL345252 homolog OS=Mus musculus PE=1 SV=2 - [YJ005_MOUSE]                                 | 37.29 | 1  | 10 | 10 | 39  | 1.932 | 0.876 | 0.964 | 0.805 | 129.43 | 37.29 | 18 | 39  | 354  | 37.7  | 5.07  |
| Q9D958   | Signal peptidase complex subunit 1 OS=Mus musculus GN=Spcc1 PE=2 SV=3 - [SPCS1_MOUSE]                              | 8.07  | 1  | 2  | 2  | 10  | 0.658 | 0.752 | 0.747 | 0.805 | 27.37  | 8.07  | 3  | 10  | 161  | 18.2  | 10.01 |
| Q8R1F0   | Leydig cell tumor 10 kDa protein homolog OS=Mus musculus GN=D8Erd738e PE=2 SV=1 - [L10K_MOUSE]                     | 25.53 | 1  | 3  | 3  | 5   | 0.787 | 0.612 | 0.967 | 0.805 | 14.48  | 25.53 | 4  | 5   | 94   | 10.2  | 11.63 |
| Q8BKH7-2 | Isoform 2 of Target of rapamycin complex 2 subunit MAPKAP1 OS=Mus musculus GN=Mapkap1 - [SIN1_MOUSE]               | 1.65  | 3  | 1  | 1  | 2   | 0.492 | 0.737 | 0.995 | 0.805 | 0.00   | 1.65  | 2  | 2   | 486  | 54.8  | 8.22  |
| G3UYQ3   | Phosphatidylserine synthase 2 OS=Mus musculus GN=Ptdss2 PE=4 SV=1 -                                                | 16.25 | 3  | 1  | 1  | 1   | 1.413 | 0.842 | 0.847 | 0.805 | 2.77   | 16.25 | 1  | 1   | 80   | 8.9   | 6.58  |
| Q8CCS2   | Transmembrane protein FAM155A OS=Mus musculus GN=Fam155a PE=2 SV=1 -                                               | 4.28  | 2  | 2  | 2  | 3   | 0.961 | 1.271 | 0.768 | 0.805 | 6.05   | 4.28  | 3  | 3   | 467  | 52.7  | 6.86  |
| Q6P5C5   | Single-strand selective monofunctional uracil DNA glycosylase OS=Mus musculus GN=Smug1 PE=2 SV=1 - [SMUG1_MOUSE]   | 21.15 | 1  | 4  | 4  | 9   | 1.131 | 2.292 | 1.054 | 0.805 | 36.64  | 21.15 | 7  | 9   | 279  | 30.6  | 6.77  |
| H3BJU7   | Rho guanine nucleotide exchange factor 2 OS=Mus musculus GN=Arhgef2 PE=2 SV=1 - [H3BJU7_MOUSE]                     | 47.59 | 17 | 36 | 36 | 152 | 0.640 | 1.259 | 1.493 | 0.805 | 459.17 | 47.59 | 66 | 152 | 956  | 108.5 | 6.87  |
| A6X8Z3   | Insulin-like growth factor 2 mRNA-binding protein 2 OS=Mus musculus GN=Igf2bp2 PE=2 SV=1 - [A6X8Z3_MOUSE]          | 4.77  | 3  | 2  | 2  | 6   | 1.279 | 0.671 | 0.784 | 0.805 | 1.65   | 4.77  | 2  | 6   | 524  | 58.0  | 7.78  |
| D3YZ05   | Translation initiation factor eIF-2B subunit alpha (Fragment) OS=Mus musculus GN=EIF2b1 PE=2 SV=1 - [D3YZ05_MOUSE] | 37.59 | 6  | 1  | 5  | 7   | 0.685 | 0.784 | 0.915 | 0.805 | 11.71  | 37.59 | 7  | 7   | 133  | 14.9  | 9.51  |
| Q99J21   | Mucolin-1 OS=Mus musculus GN=Mcoln1 PE=1 SV=1 - [MCLN1_MOUSE]                                                      | 9.31  | 3  | 3  | 3  | 18  | 0.896 | 1.185 | 0.939 | 0.806 | 25.30  | 9.31  | 4  | 18  | 580  | 65.5  | 7.65  |
| Q6NVF9   | Cleavage and polyadenylation specificity factor subunit 6 OS=Mus musculus GN=Cpsf6 PE=1 SV=1 - [CPSF6_MOUSE]       | 31.03 | 5  | 12 | 12 | 40  | 0.783 | 0.793 | 0.766 | 0.806 | 107.28 | 31.03 | 20 | 40  | 551  | 59.1  | 7.15  |
| Q9WTR5   | Cadherin-13 OS=Mus musculus GN=Cdh13 PE=1 SV=2 - [CAD13_MOUSE]                                                     | 30.67 | 1  | 18 | 18 | 150 | 0.939 | 1.142 | 0.873 | 0.806 | 442.65 | 30.67 | 30 | 150 | 714  | 78.1  | 5.12  |
| Q9Z3S6-3 | Isoform 3 of Neutralized-like protein 1A OS=Mus musculus GN=Neur1 - [NEU1A_MOUSE]                                  | 7.34  | 3  | 1  | 1  | 4   | 2.207 | 1.570 | 0.792 | 0.806 | 13.13  | 7.34  | 1  | 4   | 218  | 24.1  | 9.82  |
| Q2KN98   | Cytospin-A OS=Mus musculus GN=Specc1 PE=1 SV=1 - [CYTSA_MOUSE]                                                     | 15.92 | 1  | 16 | 16 | 47  | 1.269 | 0.767 | 1.044 | 0.806 | 156.67 | 15.92 | 28 | 47  | 1118 | 124.4 | 5.76  |

|          |                                                                                                           |       |   |    |    |     |       |       |       |       |        |       |    |     |      |       |       |
|----------|-----------------------------------------------------------------------------------------------------------|-------|---|----|----|-----|-------|-------|-------|-------|--------|-------|----|-----|------|-------|-------|
| P30412   | Peptidyl-prolyl cis-trans isomerase C OS=Mus musculus GN=Ppic PE=1 SV=1 - [PPIC_MOUSE]                    | 27.83 | 1 | 5  | 6  | 80  | 1.508 | 1.217 | 0.947 | 0.806 | 166.57 | 27.83 | 8  | 80  | 212  | 22.8  | 7.50  |
| Q8BMM4   | Leishmanolysin-like peptidase OS=Mus musculus GN=Lmln PE=2 SV=1 - [LMLN_MOUSE]                            | 6.31  | 1 | 4  | 4  | 6   | 2.615 | 1.039 | 0.661 | 0.806 | 12.05  | 6.31  | 5  | 6   | 681  | 76.5  | 7.28  |
| O09167   | 60S ribosomal protein L21 OS=Mus musculus GN=Rpl21 PE=2 SV=3 - [RL21_MOUSE]                               | 45.63 | 3 | 4  | 9  | 19  | 0.473 | 0.553 | 0.758 | 0.806 | 46.20  | 45.63 | 12 | 19  | 160  | 18.6  | 10.49 |
| G8JL40   | Lysine-specific histone demethylase 1A (Fragment) OS=Mus musculus GN=Kdm1a PE=4 SV=1 - [KDM1A_MOUSE]      | 8.35  | 5 | 6  | 6  | 11  | 0.509 | 0.784 | 0.732 | 0.806 | 25.25  | 8.35  | 9  | 11  | 683  | 75.5  | 6.80  |
| Q80U78-2 | isoform 2 of Pumilio homolog 1 OS=Mus musculus GN=Pum1 - [PUM1_MOUSE]                                     | 15.18 | 7 | 11 | 15 | 66  | 1.062 | 1.055 | 0.986 | 0.807 | 175.28 | 15.18 | 25 | 66  | 1186 | 126.3 | 6.86  |
| Q61559   | IgG receptor FcRn large subunit p51 OS=Mus musculus GN=Fcgrt PE=1 SV=1 - [FCGRN_MOUSE]                    | 7.95  | 1 | 3  | 3  | 7   | 1.039 | 1.567 | 0.936 | 0.807 | 21.15  | 7.95  | 6  | 7   | 365  | 40.1  | 5.29  |
| Q3UGF1-3 | isoform 3 of WD repeat-containing protein 19 OS=Mus musculus GN=Wdr19 - [WDR19_MOUSE]                     | 2.84  | 3 | 3  | 3  | 8   | 0.796 | 0.924 | 1.307 | 0.807 | 18.12  | 2.84  | 4  | 8   | 1021 | 115.1 | 6.29  |
| Q8BTZ5   | Ankyrin repeat domain-containing protein 46 OS=Mus musculus GN=Ankr46 PE=2 SV=1 - [ANR46_MOUSE]           | 20.61 | 1 | 4  | 4  | 14  | 0.717 | 1.023 | 0.882 | 0.807 | 41.13  | 20.61 | 8  | 14  | 228  | 25.2  | 5.73  |
| Q9D1C8   | Vacuolar protein sorting-associated protein 28 homolog OS=Mus musculus GN=Vps28 PE=2 SV=1 - [VPS28_MOUSE] | 71.04 | 1 | 13 | 13 | 52  | 1.443 | 1.187 | 0.837 | 0.807 | 136.53 | 71.04 | 20 | 52  | 221  | 25.4  | 5.54  |
| O70433   | Four and a half LIM domains protein 2 OS=Mus musculus GN=Fhl2 PE=1 SV=1 - [FHL2_MOUSE]                    | 29.03 | 1 | 8  | 8  | 15  | 0.953 | 2.740 | 2.873 | 0.807 | 41.55  | 29.03 | 13 | 15  | 279  | 32.1  | 7.30  |
| Q8CAK3   | UPF0515 protein C19orf66 homolog OS=Mus musculus PE=2 SV=1 - [CS066_MOUSE]                                | 35.86 | 2 | 10 | 10 | 42  | 1.425 | 0.613 | 1.015 | 0.807 | 111.27 | 35.86 | 18 | 42  | 290  | 33.0  | 7.28  |
| P41731   | CD63 antigen OS=Mus musculus GN=Cd63 PE=1 SV=2 - [CD63_MOUSE]                                             | 4.62  | 1 | 1  | 1  | 4   | 1.286 | 1.211 | 0.745 | 0.807 | 15.06  | 4.62  | 2  | 4   | 238  | 25.7  | 6.98  |
| Q6ZPT1   | Kelch-like protein 9 OS=Mus musculus GN=Kih9 PE=2 SV=2 - [KLHL9_MOUSE]                                    | 5.67  | 6 | 3  | 3  | 5   | 1.249 | 0.912 | 0.898 | 0.807 | 9.64   | 5.67  | 5  | 5   | 617  | 69.4  | 6.44  |
| Q61070   | Etoposide-induced protein 2.4 OS=Mus musculus GN=Ei24 PE=1 SV=3 - [EI24_MOUSE]                            | 6.47  | 1 | 3  | 3  | 7   | 0.551 | 0.630 | 0.826 | 0.807 | 16.57  | 6.47  | 4  | 7   | 340  | 38.9  | 9.72  |
| Q3TDN0   | Protein dispatched homolog 1 OS=Mus musculus GN=Disp1 PE=1 SV=2 - [DISP1_MOUSE]                           | 4.93  | 1 | 4  | 4  | 6   | 1.111 | 0.161 | 0.983 | 0.808 | 3.40   | 4.93  | 4  | 6   | 1521 | 170.0 | 6.84  |
| Q9WVH4   | Forkhead box protein O3 OS=Mus musculus GN=Foxo3 PE=1 SV=1 - [FOXO3_MOUSE]                                | 8.63  | 2 | 3  | 3  | 7   | 1.090 | 1.106 | 1.407 | 0.808 | 22.40  | 8.63  | 4  | 7   | 672  | 71.0  | 5.12  |
| P70158   | Acid sphingomyelinase-like phosphodiesterase 3a OS=Mus musculus GN=Smpd3a PE=2 SV=2 - [ASM3A_MOUSE]       | 3.15  | 1 | 3  | 3  | 5   | 1.054 | 0.693 | 0.788 | 0.808 | 12.29  | 3.15  | 4  | 5   | 445  | 49.8  | 6.46  |
| Q61749   | Translation initiation factor eIF-2B subunit delta OS=Mus musculus GN=EIF2B4 PE=2 SV=2 - [EIF2BD_MOUSE]   | 25.00 | 4 | 9  | 9  | 39  | 0.901 | 0.743 | 0.877 | 0.808 | 109.06 | 25.00 | 15 | 39  | 524  | 57.6  | 9.25  |
| G3X9G4   | Dynamin-2 OS=Mus musculus GN=Dnm2 PE=2 SV=1 - [G3X9G4_MOUSE]                                              | 46.90 | 6 | 1  | 42 | 367 | 3.468 | 1.026 | 0.881 | 0.808 | 921.31 | 46.90 | 75 | 367 | 870  | 98.0  | 7.44  |
| O88745   | Scrapie-responsive protein 1 OS=Mus musculus GN=Scrg1 PE=2 SV=1 - [SCRG1_MOUSE]                           | 40.82 | 1 | 4  | 4  | 15  | 1.787 | 0.975 | 1.081 | 0.808 | 42.41  | 40.82 | 7  | 15  | 98   | 11.2  | 7.91  |
| Q920L1   | Fatty acid desaturase 1 OS=Mus musculus GN=Fads1 PE=2 SV=1 - [FADS1_MOUSE]                                | 10.96 | 1 | 4  | 4  | 8   | 0.636 | 0.698 | 0.683 | 0.808 | 27.40  | 10.96 | 7  | 8   | 447  | 52.3  | 9.29  |
| Q8CC21   | Tetrapeptide repeat protein 19, mitochondrial OS=Mus musculus GN=Ttc19 PE=1 SV=1 - [TTC19_MOUSE]          | 13.15 | 3 | 4  | 4  | 17  | 1.172 | 1.028 | 0.733 | 0.808 | 52.62  | 13.15 | 8  | 17  | 365  | 41.2  | 6.21  |
| Q50136   | Probable ATP-dependent RNA helicase DDX17 OS=Mus musculus GN=Ddx17 PE=2 SV=1 - [DDX17_MOUSE]              | 42.92 | 3 | 20 | 29 | 203 | 0.751 | 0.606 | 0.745 | 0.808 | 605.36 | 42.92 | 48 | 203 | 650  | 72.4  | 8.59  |
| Q01341   | Adenylate cyclase type 6 OS=Mus musculus GN=Adcy6 PE=1 SV=1 - [ADCY6_MOUSE]                               | 8.93  | 2 | 6  | 10 | 36  | 0.769 | 1.287 | 0.784 | 0.809 | 93.97  | 8.93  | 19 | 36  | 1165 | 130.2 | 7.87  |
| P49935   | Pro-cathepsin H OS=Mus musculus GN=Csh PE=2 SV=2 - [CATH_MOUSE]                                           | 9.31  | 2 | 2  | 2  | 6   | 1.349 | 1.352 | 0.872 | 0.809 | 24.48  | 9.31  | 4  | 6   | 333  | 37.1  | 8.40  |

|          |                                                                                                                               |       |   |    |    |      |       |       |       |       |         |       |    |      |      |       |       |
|----------|-------------------------------------------------------------------------------------------------------------------------------|-------|---|----|----|------|-------|-------|-------|-------|---------|-------|----|------|------|-------|-------|
| O70200   | Allograft inflammatory factor 1 OS=Mus musculus GN=Aif1 PE=1 SV=1 - [AIF1_MOUSE]                                              | 49.66 | 4 | 7  | 8  | 20   | 1.731 | 1.148 | 1.112 | 0.809 | 59.10   | 49.66 | 13 | 20   | 147  | 16.9  | 8.76  |
| Q8R480   | Nuclear pore complex protein Nup85 OS=Mus musculus GN=Nup85 PE=1 SV=1 - [NUP85_MOUSE]                                         | 4.57  | 1 | 2  | 2  | 4    | 0.710 | 1.173 | 0.816 | 0.809 | 9.00    | 4.57  | 4  | 4    | 656  | 74.7  | 5.57  |
| Q8QZY9   | Splicing factor 3B subunit 4 OS=Mus musculus GN=SF3B4 PE=2 SV=1 - [SF3B4_MOUSE]                                               | 10.61 | 1 | 3  | 3  | 17   | 1.567 | 0.921 | 1.025 | 0.809 | 42.17   | 10.61 | 5  | 17   | 424  | 44.3  | 8.56  |
| J3QJZ3   | MCG116065 OS=Mus musculus GN=Gm6472 PE=4 SV=1 - [J3QJZ3_MOUSE]                                                                | 39.69 | 3 | 7  | 7  | 34   | 0.596 | 0.725 | 0.717 | 0.809 | 95.52   | 39.69 | 12 | 34   | 194  | 22.1  | 10.10 |
| Q9Z1Z2   | Serine-threonine kinase receptor-associated protein OS=Mus musculus GN=Strap PE=1 SV=2 - [STRAP_MOUSE]                        | 56.29 | 1 | 16 | 16 | 84   | 1.639 | 0.914 | 0.790 | 0.809 | 271.78  | 56.29 | 29 | 84   | 350  | 38.4  | 5.12  |
| P70318   | Nucleolysin TIAR OS=Mus musculus GN=Tiari1 PE=2 SV=1 - [TIAR_MOUSE]                                                           | 27.30 | 4 | 6  | 10 | 40   | 1.340 | 1.016 | 0.762 | 0.809 | 120.48  | 27.30 | 17 | 40   | 392  | 43.4  | 7.99  |
| P62204   | Calmodulin OS=Mus musculus GN=Calm1 PE=1 SV=2 - [CALM_MOUSE]                                                                  | 82.55 | 6 | 12 | 13 | 1097 | 1.140 | 0.993 | 1.429 | 0.809 | 2702.47 | 82.55 | 21 | 1097 | 149  | 16.8  | 4.22  |
| Q9ESD7-3 | Isoform 3 of Dysferlin OS=Mus musculus GN=Dysf - [DYSF_MOUSE]                                                                 | 3.53  | 6 | 4  | 5  | 10   | 1.100 | 0.873 | 0.773 | 0.809 | 25.37   | 3.53  | 7  | 10   | 2069 | 235.8 | 5.78  |
| G3UXZ3   | Bifunctional UDP-N-acetylglucosamine 2-epimerase/N-acetylmannosamine kinase OS=Mus musculus GN=Gne PE=2 SV=1 - [G3UXZ3_MOUSE] | 6.02  | 7 | 3  | 3  | 4    | 0.856 | 1.014 | 0.673 | 0.809 | 5.27    | 6.02  | 4  | 4    | 648  | 71.2  | 6.90  |
| Q6ZPZ3-2 | Isoform 2 of Zinc finger CCH domain-containing protein 4 OS=Mus musculus GN=Zc3h4 - [ZC3H4_MOUSE]                             | 8.35  | 3 | 6  | 6  | 22   | 1.544 | 1.057 | 1.103 | 0.809 | 58.64   | 8.35  | 12 | 22   | 1221 | 131.5 | 6.52  |
| Q643Z7   | Male-enhanced antigen 1 OS=Mus musculus GN=Mea1 PE=2 SV=1 - [MEA1_MOUSE]                                                      | 11.49 | 1 | 2  | 2  | 5    | 1.628 | 0.968 | 1.022 | 0.809 | 16.02   | 11.49 | 3  | 5    | 174  | 18.6  | 4.08  |
| Q63871   | DNA-directed RNA polymerases I, II, and III subunit RPABC4 OS=Mus musculus GN=Polr2k PE=2 SV=2 - [RPAB4_MOUSE]                | 12.07 | 2 | 1  | 1  | 7    | 1.502 | 0.735 | 1.046 | 0.809 | 15.41   | 12.07 | 2  | 7    | 58   | 7.0   | 9.06  |
| Q9CRD4   | Dysbindin domain-containing protein 2 OS=Mus musculus GN=Dynd2 PE=1 SV=1 - [DBND2_MOUSE]                                      | 7.59  | 1 | 1  | 1  | 7    | 2.717 | 1.008 | 1.331 | 0.809 | 15.87   | 7.59  | 2  | 7    | 158  | 17.2  | 4.22  |
| Q6EDY6   | Leucine-rich repeat-containing protein 16A OS=Mus musculus GN=Lrrc16a PE=1 SV=2 - [LR16A_MOUSE]                               | 21.83 | 5 | 24 | 27 | 79   | 0.817 | 0.532 | 0.677 | 0.809 | 236.55  | 21.83 | 48 | 79   | 1374 | 151.8 | 7.80  |
| Q8R554   | OTU domain-containing protein 7A OS=Mus musculus GN=Otud7a PE=2 SV=1                                                          | 15.44 | 2 | 7  | 12 | 39   | 1.127 | 0.971 | 1.122 | 0.810 | 99.60   | 15.44 | 20 | 39   | 926  | 100.7 | 8.22  |
| Q8CD10   | Calcium uptake protein 2, mitochondrial OS=Mus musculus GN=Mic2 PE=1 SV=2 - [MICU2_MOUSE]                                     | 5.32  | 1 | 2  | 2  | 3    | 1.263 | 1.083 | 0.799 | 0.810 | 8.84    | 5.32  | 3  | 3    | 432  | 49.4  | 9.45  |
| Q6DID7   | Protein wntless homolog OS=Mus musculus GN=Wls PE=1 SV=1 - [WLS_MOUSE]                                                        | 7.02  | 2 | 4  | 4  | 11   | 0.859 | 1.054 | 0.904 | 0.810 | 30.02   | 7.02  | 6  | 11   | 541  | 62.1  | 7.65  |
| Q7TME0   | Lipid phosphate phosphatase-related protein type 4 OS=Mus musculus GN=Lppr4 PE=1 SV=2 - [LPPR4_MOUSE]                         | 35.77 | 1 | 20 | 20 | 89   | 0.634 | 1.762 | 1.644 | 0.810 | 255.83  | 35.77 | 38 | 89   | 766  | 83.2  | 8.84  |
| E9Q944   | Protein Kank1 (Fragment) OS=Mus musculus GN=Kank1 PE=2 SV=1 - [E9Q944_MOUSE]                                                  | 6.45  | 2 | 5  | 6  | 14   | 1.436 | 0.771 | 0.710 | 0.810 | 32.50   | 6.45  | 9  | 14   | 1147 | 126.0 | 5.63  |
| E9Q9C7   | Actin-binding LIM protein 1 OS=Mus musculus GN=Ablim1 PE=2 SV=1 - [E9Q9C7_MOUSE]                                              | 45.21 | 6 | 1  | 25 | 139  | 1.754 | 0.950 | 1.335 | 0.810 | 353.52  | 45.21 | 47 | 139  | 668  | 75.2  | 8.09  |
| E9Q842   | Protein Nav2 OS=Mus musculus GN=Nav2 PE=2 SV=1 - [E9Q842_MOUSE]                                                               | 3.74  | 2 | 5  | 7  | 20   | 0.845 | 0.592 | 0.934 | 0.810 | 53.55   | 3.74  | 11 | 20   | 2432 | 261.5 | 8.95  |
| Q63ZW7-2 | Isoform 2 of InaD-like protein OS=Mus musculus GN=Inadl - [INADL_MOUSE]                                                       | 12.69 | 7 | 9  | 11 | 25   | 1.562 | 0.305 | 0.656 | 0.810 | 67.14   | 12.69 | 15 | 25   | 1261 | 136.5 | 4.83  |
| Q3UHX0   | Nucleolar protein 8 OS=Mus musculus GN=Nol8 PE=1 SV=2 - [NOL8_MOUSE]                                                          | 4.36  | 2 | 4  | 5  | 10   | 0.875 | 0.726 | 1.020 | 0.810 | 24.76   | 4.36  | 8  | 10   | 1147 | 128.6 | 6.55  |
| Q8BLA8   | Transient receptor potential cation channel subfamily A member 1 OS=Mus musculus GN=Trpa1 PE=1 SV=1 - [TRPA1_MOUSE]           | 1.42  | 1 | 1  | 2  | 4    | 0.547 | 0.709 | 0.698 | 0.810 | 2.35    | 1.42  | 2  | 4    | 1125 | 128.4 | 7.31  |

|          |                                                                                                           |       |   |    |    |     |       |       |       |       |        |       |    |     |      |       |       |
|----------|-----------------------------------------------------------------------------------------------------------|-------|---|----|----|-----|-------|-------|-------|-------|--------|-------|----|-----|------|-------|-------|
| Q9CQB2   | Protein FAM195A OS=Mus musculus GN=Fam195a PE=1 SV=1 - [F195A_MOUSE]                                      | 34.38 | 1 | 2  | 2  | 5   | 0.958 | 0.558 | 1.226 | 0.811 | 8.49   | 34.38 | 3  | 5   | 160  | 17.9  | 7.30  |
| Q8CQ05   | Protein Zfp317 OS=Mus musculus GN=Zfp317 PE=2 SV=1 - [Q8CQ05_MOUSE]                                       | 2.47  | 1 | 1  | 1  | 1   | 0.726 | 1.278 | 0.867 | 0.811 | 0.00   | 2.47  | 1  | 1   | 607  | 69.5  | 8.78  |
| Q923D5   | WW domain-binding protein 11 OS=Mus musculus GN=Wbp11 PE=1 SV=2 -                                         | 17.00 | 1 | 10 | 10 | 24  | 0.713 | 0.829 | 1.089 | 0.811 | 67.95  | 17.00 | 15 | 24  | 641  | 69.8  | 8.40  |
| G5E8V9   | MCG18094 (Fragment) OS=Mus musculus GN=Arfp1 PE=4 SV=1 - [G5E8V9_MOUSE]                                   | 24.13 | 4 | 7  | 8  | 24  | 0.777 | 1.451 | 1.032 | 0.811 | 64.65  | 24.13 | 13 | 24  | 373  | 41.5  | 6.76  |
| P55821   | Stathmin-2 OS=Mus musculus GN=Stmn2 PE=1 SV=1 - [STMN2_MOUSE]                                             | 43.58 | 1 | 5  | 8  | 103 | 1.171 | 0.968 | 0.840 | 0.811 | 222.60 | 43.58 | 14 | 103 | 179  | 20.8  | 8.32  |
| Q8VHY0   | Chondroitin sulfate proteoglycan 4 OS=Mus musculus GN=Cspg4 PE=1 SV=3 - [CSPG4_MOUSE]                     | 29.65 | 3 | 46 | 46 | 173 | 1.026 | 0.922 | 0.791 | 0.811 | 503.65 | 29.65 | 85 | 173 | 2327 | 252.2 | 5.44  |
| Q80T85   | DBB1- and CUL4-associated factor 5 OS=Mus musculus GN=Dcaf5 PE=1 SV=2 -                                   | 8.88  | 1 | 7  | 7  | 15  | 1.369 | 0.840 | 0.811 | 0.811 | 37.03  | 8.88  | 11 | 15  | 946  | 103.6 | 5.80  |
| Q62418-3 | Isoform 3 of Drebrin-like protein OS=Mus musculus GN=Dbnl - [DBNL_MOUSE]                                  | 45.37 | 3 | 15 | 15 | 214 | 1.640 | 1.224 | 1.279 | 0.811 | 669.71 | 45.37 | 29 | 214 | 432  | 48.3  | 4.92  |
| Q05D44   | Eukaryotic translation initiation factor 5B OS=Mus musculus GN=EIF5b PE=1 SV=2 - [IF2P_MOUSE]             | 19.08 | 1 | 19 | 19 | 48  | 0.968 | 0.864 | 0.840 | 0.811 | 142.54 | 19.08 | 32 | 48  | 1216 | 137.5 | 5.59  |
| Q6ZWN5   | 40S ribosomal protein S9 OS=Mus musculus GN=Rps9 PE=2 SV=3 - [RS9_MOUSE]                                  | 41.24 | 6 | 11 | 12 | 74  | 0.396 | 0.448 | 0.657 | 0.811 | 165.99 | 41.24 | 23 | 74  | 194  | 22.6  | 10.65 |
| Q9Z0L8-2 | Isoform II of Gamma-glutamyl hydrolase OS=Mus musculus GN=Ggh - [GGH_MOUSE]                               | 5.71  | 2 | 1  | 1  | 5   | 1.532 | 1.237 | 0.679 | 0.811 | 18.70  | 5.71  | 2  | 5   | 315  | 35.4  | 8.29  |
| Q9D8N1   | Uncharacterized protein C1orf24 homolog OS=Mus musculus PE=2 SV=1 - [CK024_MOUSE]                         | 12.50 | 1 | 2  | 3  | 4   | 2.640 | 1.235 | 0.965 | 0.811 | 4.51   | 12.50 | 3  | 4   | 392  | 41.1  | 8.15  |
| P0C192   | Leucine-rich repeat-containing protein 4B OS=Mus musculus GN=Lrrc4b PE=1 SV=1 - [LRC4B_MOUSE]             | 31.03 | 3 | 12 | 14 | 37  | 0.906 | 1.691 | 0.982 | 0.811 | 109.26 | 31.03 | 25 | 37  | 709  | 76.1  | 7.24  |
| E9Q5M4   | Protein Zfr2 OS=Mus musculus GN=Zfr2 PE=2 SV=1 - [E9Q5M4_MOUSE]                                           | 11.33 | 2 | 8  | 8  | 21  | 0.763 | 0.476 | 0.665 | 0.811 | 48.60  | 11.33 | 11 | 21  | 874  | 94.9  | 9.51  |
| B1ARW8   | Uncharacterized protein C1orf122 homolog OS=Mus musculus PE=2 SV=1 - [CA122_MOUSE]                        | 33.64 | 2 | 3  | 3  | 11  | 1.601 | 0.991 | 1.009 | 0.812 | 34.11  | 33.64 | 5  | 11  | 110  | 11.3  | 8.21  |
| Q91WK2   | Eukaryotic translation initiation factor 3 subunit H OS=Mus musculus GN=EIF3h PE=1 SV=1 - [EIF3H_MOUSE]   | 36.36 | 1 | 12 | 12 | 29  | 0.877 | 0.928 | 0.748 | 0.812 | 70.43  | 36.36 | 20 | 29  | 352  | 39.8  | 6.67  |
| Q8BI72   | CDKN2A-interacting protein OS=Mus musculus GN=Cdkn2aip PE=2 SV=1 - [CARF_MOUSE]                           | 20.07 | 1 | 9  | 10 | 20  | 0.842 | 0.942 | 0.940 | 0.812 | 62.55  | 20.07 | 17 | 20  | 563  | 59.7  | 9.16  |
| Q8R0J2   | Mannose-6-phosphate utilization defect 1 OS=Mus musculus GN=Mpd1 PE=2 SV=1 - [Q8R0J2_MOUSE]               | 8.10  | 5 | 2  | 2  | 4   | 0.443 | 0.870 | 0.644 | 0.812 | 11.19  | 8.10  | 4  | 4   | 247  | 26.4  | 8.54  |
| Q9CR76   | Transmembrane protein 186 OS=Mus musculus GN=Tmem186 PE=2 SV=2 - [TM186_MOUSE]                            | 22.22 | 1 | 3  | 3  | 3   | 1.222 | 0.992 | 0.755 | 0.812 | 7.98   | 22.22 | 3  | 3   | 216  | 24.6  | 10.11 |
| Q8K377   | Leucine-rich repeat transmembrane neuronal protein 1 OS=Mus musculus GN=Lrrtm1 PE=2 SV=1 - [LRRTM1_MOUSE] | 9.58  | 2 | 7  | 7  | 30  | 0.538 | 1.261 | 0.821 | 0.812 | 75.39  | 9.58  | 13 | 30  | 522  | 58.7  | 7.11  |
| B2RS16   | Leucine rich repeat containing 8 family, member B OS=Mus musculus GN=Lrrc8b PE=2 SV=1 - [B2RS16_MOUSE]    | 8.84  | 2 | 6  | 6  | 16  | 4.271 | 1.880 | 1.353 | 0.812 | 46.75  | 8.84  | 8  | 16  | 803  | 92.1  | 6.70  |
| P52194   | Calmequin OS=Mus musculus GN=Cqgn PE=2 SV=2 - [CLGN_MOUSE]                                                | 11.29 | 1 | 4  | 5  | 11  | 1.198 | 0.906 | 1.254 | 0.812 | 23.32  | 11.29 | 7  | 11  | 611  | 69.4  | 4.68  |
| P70362   | Ubiquitin fusion degradation protein 1 homolog OS=Mus musculus GN=Ufd11 PE=1 SV=2 - [UFD1_MOUSE]          | 26.38 | 2 | 7  | 7  | 30  | 0.920 | 0.761 | 0.808 | 0.812 | 77.07  | 26.38 | 13 | 30  | 307  | 34.5  | 6.70  |
| Q3UFS4   | G patch domain-containing protein 11 OS=Mus musculus GN=Gpatch11 PE=2 SV=2 - [GPT11_MOUSE]                | 9.92  | 1 | 2  | 3  | 4   | 1.226 | 0.626 | 0.919 | 0.812 | 6.34   | 9.92  | 4  | 4   | 262  | 30.6  | 5.08  |
| Q9CXG3   | Peptidyl-prolyl cis-trans isomerase-like 4 OS=Mus musculus GN=Ppih PE=2 SV=2 - [PPIL4_MOUSE]              | 6.30  | 2 | 2  | 2  | 5   | 0.951 | 1.080 | 1.010 | 0.812 | 12.87  | 6.30  | 3  | 5   | 492  | 57.2  | 6.11  |

|          |                                                                                                                              |       |    |    |    |     |        |       |       |       |        |       |    |     |      |       |       |
|----------|------------------------------------------------------------------------------------------------------------------------------|-------|----|----|----|-----|--------|-------|-------|-------|--------|-------|----|-----|------|-------|-------|
| F6YIY0   | Protein YIPF3 (Fragment)<br>OS=Mus musculus<br>GN=Yipf3 PE=4 SV=1 -<br>[F6YIY0_MOUSE]                                        | 7.96  | 3  | 2  | 2  | 5   | 0.771  | 1.045 | 0.601 | 0.812 | 9.10   | 7.96  | 3  | 5   | 201  | 22.4  | 8.47  |
| Q7TQE6   | Macolin OS=Mus musculus<br>GN=Tmem57 PE=2 SV=1 -<br>[MACOI_MOUSE]                                                            | 17.77 | 1  | 12 | 12 | 30  | 1.278  | 0.808 | 1.133 | 0.812 | 68.19  | 17.77 | 19 | 30  | 664  | 76.0  | 9.07  |
| E9Q5X9   | Protein Zfp819 OS=Mus musculus<br>GN=Zfp819 PE=2 SV=1 -<br>[E9Q5X9_MOUSE]                                                    | 8.10  | 2  | 2  | 2  | 2   | 3.844  | 3.713 | 1.425 | 0.812 | 2.07   | 8.10  | 2  | 2   | 531  | 59.1  | 8.66  |
| G3X9B5   | Disintegrin and metalloproteinase domain-containing protein 29<br>OS=Mus musculus<br>GN=Adam29 PE=4 SV=1 -<br>[G3X9B5_MOUSE] | 1.97  | 2  | 1  | 1  | 1   | 2.193  | 0.641 | 1.022 | 0.812 | 2.80   | 1.97  | 1  | 1   | 763  | 86.4  | 8.12  |
| G3X8T6   | Kelch-like protein 29<br>OS=Mus musculus<br>GN=Kih29 PE=4 SV=1 -<br>[G3X8T6_MOUSE]                                           | 3.89  | 2  | 3  | 3  | 4   | 1.087  | 0.794 | 1.302 | 0.812 | 7.70   | 3.89  | 4  | 4   | 875  | 94.3  | 7.17  |
| Q9DCT6-4 | Isoform 4 of Chromatin complexes subunit BAP18<br>OS=Mus musculus<br>GN=Bap18 -                                              | 42.62 | 11 | 3  | 3  | 4   | 1.466  | 1.133 | 0.870 | 0.812 | 16.59  | 42.62 | 4  | 4   | 122  | 12.4  | 9.04  |
| Q62470-2 | Isoform 2 of Integrin alpha 3<br>OS=Mus musculus<br>GN=Itga3 -<br>[ITA3_MOUSE]                                               | 12.64 | 4  | 10 | 11 | 18  | 0.681  | 1.111 | 0.658 | 0.813 | 39.86  | 12.64 | 17 | 18  | 1068 | 118.8 | 6.81  |
| Q80TCS   | Pogo transposable element with KRAB domain<br>OS=Mus musculus<br>GN=Pogk PE=2 SV=2 -<br>[POGK_MOUSE]                         | 3.13  | 2  | 2  | 2  | 2   | 0.598  | 0.476 | 0.782 | 0.813 | 4.86   | 3.13  | 2  | 2   | 607  | 69.6  | 5.29  |
| Q91WG2   | Rab GTPase-binding effector protein 2<br>OS=Mus musculus<br>GN=Rabep2 PE=2 SV=3 -<br>[RABE2_MOUSE]                           | 34.84 | 5  | 15 | 15 | 55  | 2.160  | 1.098 | 1.099 | 0.813 | 176.85 | 34.84 | 28 | 55  | 554  | 62.1  | 4.89  |
| Q5SWP3   | NAC-alpha domain-containing protein 1<br>OS=Mus musculus<br>GN=Nacad PE=1 SV=1 -<br>[NACAD_MOUSE]                            | 23.87 | 2  | 24 | 24 | 85  | 1.985  | 0.494 | 1.034 | 0.813 | 261.91 | 23.87 | 41 | 85  | 1504 | 156.7 | 4.56  |
| P61211   | ADP-ribosylation factor-like protein 1<br>OS=Mus musculus<br>GN=Arl1 PE=2 SV=1 -<br>[ARL1_MOUSE]                             | 34.25 | 3  | 6  | 6  | 22  | 0.571  | 0.689 | 0.752 | 0.813 | 69.79  | 34.25 | 11 | 22  | 181  | 20.4  | 5.72  |
| Q9R087   | Glypican-6<br>OS=Mus musculus<br>GN=Gpc6 PE=1 SV=1 -<br>[GPC6_MOUSE]                                                         | 17.84 | 2  | 7  | 9  | 25  | 1.027  | 1.164 | 0.767 | 0.813 | 84.25  | 17.84 | 14 | 25  | 555  | 63.0  | 5.43  |
| Q99J09   | Methylosome protein 50<br>OS=Mus musculus<br>GN=Wdr77 PE=1 SV=1 -<br>[MEP50_MOUSE]                                           | 30.12 | 3  | 9  | 9  | 45  | 1.273  | 0.902 | 0.819 | 0.813 | 162.46 | 30.12 | 17 | 45  | 342  | 36.9  | 5.27  |
| Q80VJ2   | Steroid receptor RNA activator 1<br>OS=Mus musculus<br>GN=Sra1 PE=1 SV=3 -<br>[SRA1_MOUSE]                                   | 30.17 | 2  | 6  | 6  | 27  | 1.583  | 0.846 | 1.337 | 0.813 | 53.63  | 30.17 | 9  | 27  | 232  | 25.5  | 6.43  |
| Q8BRT1-5 | Isoform 2 of CLIP-associating protein 2<br>OS=Mus musculus<br>GN=Clasp2 -                                                    | 30.00 | 2  | 1  | 15 | 54  | 2.193  | 1.304 | 0.690 | 0.813 | 133.46 | 30.00 | 24 | 54  | 600  | 66.3  | 6.67  |
| Q8VDM6   | Heterogeneous nuclear ribonucleoprotein U-like protein 1<br>OS=Mus musculus<br>GN=Hnrnpu1 PE=1 SV=1 -<br>[HNRPU1_MOUSE]      | 26.19 | 3  | 20 | 20 | 73  | 0.752  | 0.798 | 0.777 | 0.813 | 197.92 | 26.19 | 34 | 73  | 859  | 95.9  | 6.58  |
| P62717   | 60S ribosomal protein L18a<br>OS=Mus musculus<br>GN=Rpl18a PE=1 SV=1 -<br>[RL18A_MOUSE]                                      | 39.20 | 2  | 8  | 8  | 43  | 0.419  | 0.606 | 0.648 | 0.813 | 111.71 | 39.20 | 14 | 43  | 176  | 20.7  | 10.71 |
| F6TBA6   | Kv channel-interacting protein 2 (Fragment)<br>OS=Mus musculus<br>GN=Kcni2 PE=2 SV=1 -<br>[F6TBA6_MOUSE]                     | 26.74 | 2  | 1  | 4  | 11  | 10.601 | 1.845 | 1.447 | 0.814 | 30.03  | 26.74 | 6  | 11  | 172  | 19.9  | 6.05  |
| Q9R1C7   | Pre-mRNA-processing factor 40 homolog A<br>OS=Mus musculus<br>GN=Prpf40a PE=1 SV=1 -<br>[PR40A_MOUSE]                        | 17.94 | 3  | 14 | 15 | 40  | 1.048  | 0.954 | 0.997 | 0.814 | 104.24 | 17.94 | 26 | 40  | 953  | 108.4 | 7.69  |
| Q91V55   | 40S ribosomal protein S5<br>OS=Mus musculus<br>GN=Rps5 PE=2 SV=1 -<br>[Q91V55_MOUSE]                                         | 39.22 | 3  | 8  | 8  | 116 | 0.612  | 0.722 | 0.768 | 0.814 | 313.25 | 39.22 | 15 | 116 | 204  | 22.9  | 9.72  |
| Q8BMA6   | Signal recognition particle subunit SRP68<br>OS=Mus musculus<br>GN=Srp68 PE=2 SV=2 -<br>[SRP68_MOUSE]                        | 37.12 | 2  | 19 | 19 | 58  | 0.624  | 0.733 | 0.759 | 0.814 | 157.48 | 37.12 | 31 | 58  | 625  | 70.5  | 8.57  |
| O70435   | Proteasome subunit alpha type-3<br>OS=Mus musculus<br>GN=Psm3 PE=1 SV=3 -<br>[PSA3_MOUSE]                                    | 36.86 | 5  | 10 | 10 | 44  | 1.809  | 0.843 | 0.770 | 0.814 | 142.52 | 36.86 | 18 | 44  | 255  | 28.4  | 5.44  |
| Q6ZWY8   | Thymosin beta-10<br>OS=Mus musculus<br>GN=Tmsb10 PE=2 SV=3 -<br>[TYB10_MOUSE]                                                | 45.45 | 2  | 4  | 5  | 28  | 1.516  | 0.847 | 1.069 | 0.814 | 36.70  | 45.45 | 9  | 28  | 44   | 5.0   | 5.36  |
| Q8VHE0   | Translocation protein SEC63 homolog<br>OS=Mus musculus<br>GN=Sec63 PE=1 SV=4 -<br>[SEC63_MOUSE]                              | 21.32 | 1  | 13 | 13 | 36  | 0.767  | 0.770 | 0.884 | 0.814 | 118.63 | 21.32 | 22 | 36  | 760  | 87.8  | 5.38  |
| Q9DC23   | DnaJ homolog subfamily C member 10<br>OS=Mus musculus<br>GN=Dnajc10 PE=1 SV=2 -                                              | 11.48 | 1  | 8  | 8  | 17  | 0.730  | 1.019 | 0.843 | 0.814 | 52.16  | 11.48 | 12 | 17  | 793  | 90.5  | 6.96  |



|          |                                                                                                                                    |       |   |    |    |     |       |       |       |       |        |       |    |     |      |       |       |
|----------|------------------------------------------------------------------------------------------------------------------------------------|-------|---|----|----|-----|-------|-------|-------|-------|--------|-------|----|-----|------|-------|-------|
| Q99L08   | Translation initiation factor eIF-2B subunit alpha OS=Mus musculus GN=EIF2b1 PE=2 SV=1 - [E12BA_MOUSE]                             | 33.44 | 7 | 5  | 9  | 19  | 0.684 | 0.906 | 0.808 | 0.814 | 44.47  | 33.44 | 15 | 19  | 305  | 33.8  | 8.32  |
| Q91XW9   | MCG133388, isoform CRA_f OS=Mus musculus GN=Pcdhg5 PE=2 SV=1 - [Q91XW9_MOUSE]                                                      | 12.82 | 1 | 6  | 8  | 35  | 0.512 | 2.046 | 1.949 | 0.814 | 98.50  | 12.82 | 15 | 35  | 944  | 101.8 | 5.27  |
| O54962   | Barrier-to-aintegration factor OS=Mus musculus GN=Banf1 PE=1 SV=1 - [BAF_MOUSE]                                                    | 43.82 | 1 | 3  | 3  | 18  | 0.750 | 0.961 | 0.959 | 0.814 | 52.24  | 43.82 | 5  | 18  | 89   | 10.1  | 6.09  |
| P16297   | Interleukin-2 receptor subunit beta OS=Mus musculus GN=Il2rb PE=2 SV=1 - [IL2RB_MOUSE]                                             | 2.97  | 1 | 1  | 1  | 1   | 1.585 | 1.831 | 0.855 | 0.814 | 3.28   | 2.97  | 1  | 1   | 539  | 60.5  | 5.64  |
| O54734   | Dolichyl- diphosphooligosaccharide-- protein glycosyltransferase 48 kDa subunit OS=Mus musculus GN=Ddost PE=1 SV=2 - [OST48_MOUSE] | 24.49 | 1 | 9  | 9  | 33  | 0.584 | 0.731 | 0.686 | 0.814 | 100.51 | 24.49 | 14 | 33  | 441  | 49.0  | 5.83  |
| A2AT93   | Protein Plcb4 (Fragment) OS=Mus musculus GN=Plcb4 PE=2 SV=1 - [A2AT93_MOUSE]                                                       | 46.27 | 1 | 2  | 13 | 44  | 0.804 | 0.336 | 0.836 | 0.814 | 133.67 | 46.27 | 22 | 44  | 255  | 29.4  | 9.14  |
| A6H644   | MCG130490 OS=Mus musculus GN=Ppp1r12b PE=2 SV=1 - [A6H644_MOUSE]                                                                   | 16.73 | 2 | 13 | 14 | 35  | 1.196 | 0.997 | 1.174 | 0.814 | 79.69  | 16.73 | 21 | 35  | 992  | 110.9 | 5.74  |
| A2AJW4   | Protein phosphatase 1 regulatory subunit 3 OS=Mus musculus GN=Ppp1r3d PE=4 SV=1 - [A2AJW4_MOUSE]                                   | 19.71 | 1 | 4  | 4  | 10  | 1.106 | 0.767 | 0.778 | 0.815 | 28.02  | 19.71 | 8  | 10  | 279  | 30.5  | 8.25  |
| P61750   | ADP-ribosylation factor 4 OS=Mus musculus GN=Arf4 PE=2 SV=2 - [ARF4_MOUSE]                                                         | 67.78 | 6 | 4  | 10 | 112 | 0.787 | 0.944 | 0.729 | 0.815 | 356.16 | 67.78 | 18 | 112 | 180  | 20.4  | 7.14  |
| Q8R2T8-2 | Isoform 2 of General transcription factor 3C polypeptide 5 OS=Mus musculus GN=Gtf3c5 - [TF3C5_MOUSE]                               | 1.75  | 2 | 1  | 1  | 2   | 1.191 | 0.745 | 0.887 | 0.815 | 4.41   | 1.75  | 2  | 2   | 514  | 59.8  | 6.73  |
| Q01339   | Beta-2-glycoprotein 1 OS=Mus musculus GN=ApoH PE=1 SV=1 - [APOH_MOUSE]                                                             | 35.65 | 3 | 11 | 11 | 39  | 3.454 | 2.397 | 0.626 | 0.815 | 100.20 | 35.65 | 19 | 39  | 345  | 38.6  | 8.22  |
| Q0VGB7   | Serine/threonine-protein phosphatase 4 regulatory subunit 2 OS=Mus musculus GN=Ppp4r2 PE=1 SV=1 - [PP4R2_MOUSE]                    | 25.18 | 1 | 7  | 8  | 9   | 1.574 | 1.302 | 1.014 | 0.815 | 23.88  | 25.18 | 9  | 9   | 417  | 46.4  | 4.56  |
| E9QQ99   | E3 ubiquitin-protein ligase synoviolin OS=Mus musculus GN=Synv1 PE=2 SV=1 - [E9QQ99_MOUSE]                                         | 4.10  | 4 | 3  | 3  | 15  | 0.875 | 0.825 | 0.872 | 0.815 | 36.64  | 4.10  | 5  | 15  | 561  | 61.4  | 6.84  |
| Q9Z0N1   | Eukaryotic translation initiation factor 2 subunit 3, X-linked OS=Mus musculus GN=EIF2s3x PE=1 SV=2 - [EIF2S3X_MOUSE]              | 32.20 | 3 | 13 | 13 | 56  | 0.709 | 0.658 | 0.750 | 0.815 | 151.80 | 32.20 | 23 | 56  | 472  | 51.0  | 8.40  |
| Q80TN7   | Neuron navigator 3 OS=Mus musculus GN=Nav3 PE=1 SV=2 - [NAV3_MOUSE]                                                                | 9.11  | 4 | 15 | 16 | 32  | 0.935 | 0.873 | 1.006 | 0.815 | 81.26  | 9.11  | 23 | 32  | 2359 | 252.1 | 8.76  |
| Q5XY5    | Coatomer subunit delta OS=Mus musculus GN=Arct1 PE=2 SV=2 - [COPD_MOUSE]                                                           | 34.25 | 1 | 19 | 19 | 69  | 0.821 | 0.815 | 0.787 | 0.815 | 166.22 | 34.25 | 35 | 69  | 511  | 57.2  | 6.21  |
| P51859   | Hepatoma-derived growth factor OS=Mus musculus GN=Hdgr PE=1 SV=2 - [HDGF_MOUSE]                                                    | 41.77 | 3 | 10 | 11 | 67  | 0.999 | 0.559 | 1.303 | 0.815 | 202.95 | 41.77 | 19 | 67  | 237  | 26.3  | 4.83  |
| Q7TNS2   | Mitochondrial inner membrane organizing system protein 1 OS=Mus musculus GN=Minos1 PE=2 SV=1 - [MINOS1_MOUSE]                      | 10.53 | 1 | 1  | 1  | 4   | 2.349 | 0.911 | 0.632 | 0.815 | 9.63   | 10.53 | 2  | 4   | 76   | 8.6   | 8.94  |
| P62908   | 40S ribosomal protein S3 OS=Mus musculus GN=Rps3 PE=1 SV=1 - [RS3_MOUSE]                                                           | 59.67 | 2 | 15 | 15 | 105 | 0.624 | 0.761 | 0.751 | 0.815 | 306.90 | 59.67 | 30 | 105 | 243  | 26.7  | 9.66  |
| Q8K2F8   | Protein LSM14 homolog A OS=Mus musculus GN=Lsm14a PE=1 SV=1 - [LS14A_MOUSE]                                                        | 23.16 | 3 | 10 | 11 | 42  | 1.176 | 0.636 | 0.990 | 0.815 | 95.01  | 23.16 | 19 | 42  | 462  | 50.5  | 9.52  |
| Q8VDM1   | Zinc finger CCH-type with G patch domain-containing protein OS=Mus musculus GN=Zgpat PE=2 SV=1 - [ZGPAT_MOUSE]                     | 10.18 | 2 | 4  | 4  | 10  | 0.797 | 0.743 | 0.801 | 0.815 | 29.91  | 10.18 | 7  | 10  | 511  | 56.4  | 5.33  |
| P62702   | 40S ribosomal protein S4, X isoform OS=Mus musculus GN=Rps4x PE=2 SV=2 - [RS4X_MOUSE]                                              | 55.51 | 2 | 13 | 15 | 68  | 0.518 | 0.548 | 0.717 | 0.815 | 177.67 | 55.51 | 27 | 68  | 263  | 29.6  | 10.15 |
| Q8BHP3   | Thrombospondin type-1 domain-containing protein 7B OS=Mus musculus GN=Thsd7b PE=2 SV=1 - [Q8BHP3_MOUSE]                            | 1.90  | 3 | 2  | 2  | 3   | 0.997 | 0.713 | 0.748 | 0.815 | 7.32   | 1.90  | 3  | 3   | 1107 | 123.6 | 7.62  |
| Q91WR3-2 | Isoform 2 of Activating signal cointegrator 1 complex subunit 2 OS=Mus musculus GN=Asc2 - [ASC2_MOUSE]                             | 1.41  | 3 | 1  | 1  | 1   | 1.171 | 0.944 | 1.050 | 0.816 | 1.88   | 1.41  | 1  | 1   | 709  | 80.9  | 4.94  |

|          |                                                                                                                                                                                               |       |   |    |    |     |       |       |       |       |        |       |    |     |      |       |       |
|----------|-----------------------------------------------------------------------------------------------------------------------------------------------------------------------------------------------|-------|---|----|----|-----|-------|-------|-------|-------|--------|-------|----|-----|------|-------|-------|
| E0CYV4   | Desumoylating isopeptidase 2 (Fragment)<br>OS=Mus musculus<br>GN=Desi2 PE=2 SV=1 - [E0CYV4_MOUSE]                                                                                             | 12.50 | 3 | 1  | 1  | 2   | 0.633 | 0.496 | 1.012 | 0.816 | 5.27   | 12.50 | 2  | 2   | 136  | 15.3  | 5.25  |
| Q810U4-2 | Isoform 2 of Neuronal cell adhesion molecule<br>OS=Mus musculus<br>GN=Nrcam -                                                                                                                 | 38.53 | 2 | 1  | 35 | 248 | 1.679 | 1.293 | 1.052 | 0.816 | 765.45 | 38.53 | 65 | 248 | 1186 | 131.2 | 6.06  |
| P97784   | Cryptochrome-1 OS=Mus musculus<br>GN=Cry1 PE=1 SV=1 - [CRY1_MOUSE]                                                                                                                            | 2.48  | 1 | 1  | 2  | 3   | 3.354 | 1.256 | 0.498 | 0.816 | 7.65   | 2.48  | 3  | 3   | 606  | 68.0  | 7.97  |
| Q9CZ8    | 40S ribosomal protein S19<br>OS=Mus musculus<br>GN=Rps19 PE=1 SV=3 - [RS19_MOUSE]                                                                                                             | 53.79 | 4 | 1  | 10 | 67  | 0.797 | 0.724 | 0.846 | 0.816 | 189.71 | 53.79 | 19 | 67  | 145  | 16.1  | 10.40 |
| Q91VW5   | Golgin subfamily A member 4 OS=Mus musculus<br>GN=Golga4 PE=1 SV=2 -                                                                                                                          | 28.19 | 1 | 51 | 55 | 156 | 1.699 | 1.018 | 1.072 | 0.816 | 433.64 | 28.19 | 86 | 156 | 2238 | 257.4 | 5.36  |
| A0AUP1   | Coiled-coil domain-containing protein 112<br>OS=Mus musculus<br>GN=Ccdc112 PE=2 SV=2 - [CC112_MOUSE]                                                                                          | 8.60  | 2 | 1  | 5  | 8   | 0.846 | 0.975 | 0.867 | 0.816 | 11.50  | 8.60  | 5  | 8   | 442  | 52.7  | 9.60  |
| Q9D031   | Ras suppressor protein 1<br>OS=Mus musculus<br>GN=Rsu1 PE=2 SV=1 - [Q9D031_MOUSE]                                                                                                             | 50.90 | 6 | 9  | 9  | 31  | 0.846 | 1.234 | 0.672 | 0.816 | 86.64  | 50.90 | 17 | 31  | 277  | 31.4  | 8.63  |
| Q9CSN1   | SNW domain-containing protein 1 OS=Mus musculus<br>GN=Snw1 PE=1 SV=3 - [SNW1_MOUSE]                                                                                                           | 36.19 | 1 | 16 | 17 | 60  | 1.074 | 0.473 | 1.090 | 0.816 | 175.76 | 36.19 | 28 | 60  | 536  | 61.4  | 9.48  |
| Q8BW86-2 | Isoform 2 of Rho guanine nucleotide exchange factor 33 OS=Mus musculus<br>GN=Arhgef33 - [ARG33_MOUSE]                                                                                         | 6.41  | 2 | 5  | 5  | 6   | 1.172 | 0.756 | 2.177 | 0.816 | 16.17  | 6.41  | 6  | 6   | 764  | 84.8  | 6.81  |
| Q64012-2 | Isoform 1 of RNA-binding protein Raly OS=Mus musculus<br>GN=Raly - [RALY_MOUSE]                                                                                                               | 45.95 | 5 | 12 | 12 | 49  | 0.417 | 0.550 | 0.785 | 0.816 | 163.93 | 45.95 | 22 | 49  | 296  | 31.2  | 9.38  |
| Q8BM88   | Cathepsin O OS=Mus musculus<br>GN=Ctso PE=2 SV=1 - [CATO_MOUSE]                                                                                                                               | 8.65  | 1 | 3  | 3  | 5   | 1.374 | 0.865 | 0.731 | 0.816 | 12.04  | 8.65  | 5  | 5   | 312  | 34.7  | 7.80  |
| Q8BZB3   | Transmembrane protein C15orf27 homolog<br>OS=Mus musculus PE=2 SV=3 - [CO027_MOUSE]                                                                                                           | 18.03 | 2 | 5  | 5  | 14  | 1.383 | 0.653 | 1.001 | 0.816 | 38.51  | 18.03 | 8  | 14  | 538  | 58.9  | 4.87  |
| Q9D0B6   | Protein PBDC1 OS=Mus musculus<br>GN=Pbdc1 PE=2 SV=1 - [PBDC1_MOUSE]                                                                                                                           | 33.84 | 2 | 7  | 7  | 20  | 1.232 | 1.008 | 0.789 | 0.816 | 49.08  | 33.84 | 13 | 20  | 198  | 22.2  | 4.55  |
| O55029   | Coatomer subunit beta' OS=Mus musculus<br>GN=Copb2 PE=2 SV=2 - [COPB2_MOUSE]                                                                                                                  | 36.24 | 1 | 26 | 26 | 103 | 1.080 | 0.901 | 0.758 | 0.816 | 312.11 | 36.24 | 49 | 103 | 905  | 102.4 | 5.30  |
| Q8BGAB-2 | Isoform 2 of Acyl-coenzyme A synthetase ACSM5, mitochondrial OS=Mus musculus<br>GN=Acsm5 - [ACSM5_MOUSE]<br>Group XV phospholipase A2 OS=Mus musculus<br>GN=Pla2g15 PE=1 SV=1 - [PAG15_MOUSE] | 5.79  | 2 | 1  | 1  | 1   | 1.567 | 1.104 | 0.686 | 0.816 | 2.78   | 5.79  | 1  | 1   | 311  | 34.6  | 9.06  |
| Q8VEB4   | Density-regulated protein (Fragment) OS=Mus musculus<br>GN=Denr PE=2 SV=1 - [E9Q0G1_MOUSE]                                                                                                    | 10.92 | 1 | 5  | 5  | 13  | 1.552 | 1.189 | 0.898 | 0.816 | 32.33  | 10.92 | 8  | 13  | 412  | 47.3  | 6.47  |
| E9Q0G1   | Density-regulated protein (Fragment) OS=Mus musculus<br>GN=Denr PE=2 SV=1 - [E9Q0G1_MOUSE]                                                                                                    | 19.67 | 2 | 4  | 4  | 15  | 0.949 | 0.476 | 1.010 | 0.816 | 36.97  | 19.67 | 7  | 15  | 183  | 20.5  | 7.53  |
| A2AAV5   | SH3 and PX domain-containing protein 2B OS=Mus musculus<br>GN=Sh3pdx2b PE=1 SV=1 - [SPD2B_MOUSE]                                                                                              | 16.85 | 1 | 12 | 12 | 23  | 1.220 | 0.636 | 0.854 | 0.817 | 63.86  | 16.85 | 17 | 23  | 908  | 101.5 | 8.66  |
| Q9CQ48   | NudC domain-containing protein 2 OS=Mus musculus<br>GN=Nudcd2 PE=1 SV=1 -                                                                                                                     | 41.40 | 2 | 5  | 5  | 20  | 1.431 | 0.949 | 0.804 | 0.817 | 59.44  | 41.40 | 8  | 20  | 157  | 17.6  | 5.07  |
| D6R151   | Trehalase OS=Mus musculus<br>GN=Treh PE=2 SV=1 - [D6R151_MOUSE]                                                                                                                               | 18.00 | 2 | 1  | 1  | 2   | 0.403 | 0.827 | 1.062 | 0.817 | 0.00   | 18.00 | 1  | 2   | 150  | 17.2  | 5.69  |
| Q6P4S8   | Integrator complex subunit 1 OS=Mus musculus<br>GN=Ints1 PE=1 SV=2 - [INT1_MOUSE]                                                                                                             | 4.15  | 2 | 7  | 7  | 12  | 0.558 | 0.805 | 0.703 | 0.817 | 42.95  | 4.15  | 11 | 12  | 2195 | 245.0 | 6.28  |
| Q3TJ22   | Angio-associated migratory protein OS=Mus musculus<br>GN=Aamp PE=2 SV=1 - [Q3TJ22_MOUSE]                                                                                                      | 17.24 | 2 | 7  | 7  | 22  | 1.551 | 1.070 | 0.817 | 0.817 | 79.50  | 17.24 | 13 | 22  | 435  | 46.9  | 4.41  |
| Q8CFX3   | Protein Pcdh1 OS=Mus musculus<br>GN=Pcdh1 PE=2 SV=1 - [Q8CFX3_MOUSE]                                                                                                                          | 37.86 | 1 | 3  | 26 | 169 | 0.701 | 2.278 | 2.013 | 0.817 | 511.43 | 37.86 | 45 | 169 | 1038 | 112.3 | 5.02  |
| Q9CW46   | Ribonucleoprotein PTB-binding 1 OS=Mus musculus<br>GN=Raver1 PE=1 SV=2 -                                                                                                                      | 16.04 | 2 | 8  | 8  | 28  | 1.429 | 1.070 | 0.844 | 0.817 | 59.59  | 16.04 | 14 | 28  | 748  | 79.3  | 8.72  |
| E0CZ61   | Protein Gm16039 (Fragment) OS=Mus musculus<br>GN=Gm16039 PE=2 SV=1 -                                                                                                                          | 27.88 | 6 | 2  | 2  | 7   | 1.785 | 1.368 | 1.141 | 0.817 | 27.15  | 27.88 | 3  | 7   | 104  | 11.0  | 4.59  |
| Q4VAA2   | Protein CDV3 OS=Mus musculus<br>GN=Cdv3 PE=1 SV=2 - [CDV3_MOUSE]                                                                                                                              | 53.02 | 3 | 10 | 10 | 68  | 1.677 | 0.717 | 1.230 | 0.817 | 173.19 | 53.02 | 17 | 68  | 281  | 29.7  | 6.10  |

|          |                                                                                                                          |       |   |    |    |     |       |       |       |       |        |       |     |     |      |       |       |
|----------|--------------------------------------------------------------------------------------------------------------------------|-------|---|----|----|-----|-------|-------|-------|-------|--------|-------|-----|-----|------|-------|-------|
| P58252   | Elongation factor 2<br>OS=Mus musculus<br>GN=Eef2 PE=1 SV=2 -<br>[EF2_MOUSE]                                             | 61.77 | 1 | 48 | 50 | 323 | 0.798 | 0.896 | 0.815 | 0.817 | 890.13 | 61.77 | 92  | 323 | 858  | 95.3  | 6.83  |
| E9Q0G0   | Protein 4932415D10Rik<br>OS=Mus musculus<br>GN=4932415D10Rik PE=4<br>SV=1 - [E9Q0G0_MOUSE]                               | 1.42  | 1 | 1  | 1  | 1   | 1.155 | 0.580 | 1.021 | 0.818 | 1.86   | 1.42  | 1   | 1   | 563  | 63.7  | 10.02 |
| A2AL79   | Aspartyl/asparaginyl beta-<br>hydroxylase OS=Mus<br>musculus GN=Asph PE=2<br>SV=1 - [A2AL79_MOUSE]                       | 25.89 | 4 | 2  | 3  | 9   | 0.843 | 0.909 | 0.864 | 0.818 | 18.47  | 25.89 | 5   | 9   | 197  | 20.7  | 4.39  |
| Q7TN98-5 | Isoform 5 of Cytoplasmic<br>polyadenylation element-<br>binding protein 4 OS=Mus<br>musculus GN=Cpeb4 -<br>[CPEB4_MOUSE] | 26.14 | 7 | 6  | 11 | 31  | 1.048 | 1.075 | 1.037 | 0.818 | 91.22  | 26.14 | 19  | 31  | 704  | 77.2  | 6.90  |
| Q9CZ51   | Aldehyde dehydrogenase<br>X, mitochondrial OS=Mus<br>musculus GN=Aldh1b1<br>PE=2 SV=1 -<br>[AL1B1_MOUSE]                 | 49.52 | 3 | 20 | 22 | 127 | 0.577 | 0.692 | 0.774 | 0.818 | 403.50 | 49.52 | 39  | 127 | 519  | 57.5  | 7.02  |
| P97465   | Docking protein 1 OS=Mus<br>musculus GN=Dok1 PE=1<br>SV=2 - [DOK1_MOUSE]                                                 | 6.02  | 1 | 1  | 1  | 1   | 1.741 | 1.206 | 0.886 | 0.818 | 2.17   | 6.02  | 1   | 1   | 482  | 52.4  | 6.57  |
| Q07079   | Insulin-like growth factor-<br>binding protein 5 OS=Mus<br>musculus GN=Igfbp5<br>PE=1 SV=1 -<br>[IBP5_MOUSE]             | 19.93 | 1 | 4  | 5  | 13  | 1.424 | 1.104 | 0.785 | 0.818 | 39.75  | 19.93 | 9   | 13  | 271  | 30.4  | 8.12  |
| Q0V8T8-2 | Isoform 2 of Contactin-<br>associated protein like 5-2<br>OS=Mus musculus<br>GN=Cntnap5b -                               | 3.24  | 2 | 1  | 3  | 11  | 0.398 | 0.875 | 0.882 | 0.818 | 30.58  | 3.24  | 6   | 11  | 1235 | 137.7 | 6.30  |
| P11881-8 | Isoform 8 of Inositol 1,4,5-<br>trisphosphate receptor<br>type 1 OS=Mus musculus<br>GN=Itpr1 -<br>[ITPR1_MOUSE]          | 26.99 | 8 | 56 | 66 | 165 | 0.964 | 1.729 | 1.914 | 0.818 | 463.80 | 26.99 | 112 | 165 | 2694 | 306.7 | 6.29  |
| P62900   | 60S ribosomal protein L31<br>OS=Mus musculus<br>GN=Rpl31 PE=2 SV=1 -<br>[RL31_MOUSE]                                     | 30.40 | 1 | 4  | 4  | 22  | 0.770 | 0.782 | 0.792 | 0.818 | 62.71  | 30.40 | 8   | 22  | 125  | 14.5  | 10.54 |
| E9Q8P5   | PDZ and LIM domain<br>protein 5 OS=Mus<br>musculus GN=Pdlim5<br>PE=2 SV=2 -                                              | 35.98 | 3 | 1  | 5  | 16  | 0.994 | 1.592 | 1.114 | 0.818 | 55.62  | 35.98 | 9   | 16  | 239  | 26.3  | 9.67  |
| G3X9N3   | MCG16539 OS=Mus<br>musculus GN=Primal2<br>PE=4 SV=1 -<br>[G3X9N3_MOUSE]                                                  | 25.11 | 1 | 13 | 13 | 54  | 0.697 | 1.410 | 0.851 | 0.818 | 140.04 | 25.11 | 22  | 54  | 661  | 71.7  | 5.17  |
| Q6PGB6-3 | Isoform 3 of N-alpha-<br>acetyltransferase 50<br>OS=Mus musculus<br>GN=Naa50<br>[NAA50_MOUSE]                            | 61.24 | 5 | 9  | 9  | 24  | 0.667 | 0.793 | 0.782 | 0.818 | 49.17  | 61.24 | 17  | 24  | 129  | 14.9  | 8.56  |
| Q8BND5-2 | Isoform 2 of Sulfhydryl<br>oxidase 1 OS=Mus<br>musculus GN=Qsox1 -<br>[QSOX1_MOUSE]                                      | 11.50 | 4 | 6  | 6  | 10  | 1.508 | 1.039 | 0.720 | 0.818 | 37.13  | 11.50 | 9   | 10  | 661  | 73.3  | 6.89  |
| Q9Z277   | Tyrosine-protein kinase<br>BAZ1B OS=Mus musculus<br>GN=Baz1b PE=1 SV=2 -<br>[BAZ1B_MOUSE]                                | 7.10  | 2 | 9  | 10 | 16  | 0.501 | 0.760 | 0.824 | 0.818 | 38.20  | 7.10  | 14  | 16  | 1479 | 170.5 | 8.60  |
| Q8BRV5   | Uncharacterized protein<br>KIAA1671 OS=Mus<br>musculus GN=Kiaa1671<br>PE=2 SV=1 -                                        | 18.18 | 1 | 4  | 4  | 20  | 0.819 | 1.095 | 1.304 | 0.818 | 52.31  | 18.18 | 8   | 20  | 308  | 34.6  | 6.09  |
| E9PYQ0   | Protein Rsph10b OS=Mus<br>musculus GN=Rsph10b<br>PE=2 SV=1 -<br>[E9PYQ0_MOUSE]                                           | 4.68  | 1 | 2  | 2  | 2   | 1.367 | 1.089 | 1.372 | 0.818 | 0.00   | 4.68  | 2   | 2   | 876  | 101.5 | 6.84  |
| Q811F1   | Zinc finger and BTB<br>domain-containing protein<br>41 OS=Mus musculus<br>GN=Zbtb41 PE=2 SV=4 -<br>[ZBT41_MOUSE]         | 1.54  | 1 | 1  | 2  | 2   | 1.941 | 1.553 | 0.983 | 0.819 | 4.73   | 1.54  | 2   | 2   | 908  | 104.6 | 7.91  |
| Q91X97   | Neurocalcin-delta OS=Mus<br>musculus GN=Ncald PE=1<br>SV=4 - [NCALD_MOUSE]                                               | 75.13 | 4 | 8  | 13 | 207 | 0.949 | 1.481 | 1.008 | 0.819 | 587.88 | 75.13 | 25  | 207 | 193  | 22.2  | 5.35  |
| E9Q9U8   | Protein Ccdc74a OS=Mus<br>musculus GN=Ccdc74a<br>PE=4 SV=1 -<br>[E9Q9U8_MOUSE]                                           | 17.86 | 2 | 3  | 4  | 7   | 0.701 | 1.433 | 0.757 | 0.819 | 11.28  | 17.86 | 5   | 7   | 364  | 39.7  | 10.24 |
| Q9CY22   | Tumor protein D54<br>OS=Mus musculus<br>GN=Tpd52l2 PE=1 SV=1 -<br>[TPD54_MOUSE]                                          | 71.36 | 2 | 2  | 16 | 74  | 1.212 | 1.359 | 1.012 | 0.819 | 232.11 | 71.36 | 26  | 74  | 220  | 24.0  | 6.15  |
| Q9DASS   | Ceacam12 protein<br>OS=Mus musculus<br>GN=Ceacam12 PE=2<br>SV=1 - [Q9DASS_MOUSE]                                         | 4.58  | 3 | 1  | 1  | 1   | 2.613 | 1.816 | 1.244 | 0.819 | 1.92   | 4.58  | 1   | 1   | 262  | 29.5  | 7.09  |
| Q09XV5   | Chromodomain-helicase-<br>DNA-binding protein 8<br>OS=Mus musculus<br>GN=Chd8 PE=1 SV=1 -<br>[CHD8_MOUSE]                | 3.21  | 3 | 4  | 7  | 10  | 1.132 | 0.679 | 0.978 | 0.820 | 23.54  | 3.21  | 10  | 10  | 2582 | 290.7 | 6.42  |
| Q9ERE7   | LDLR chaperone MESD<br>OS=Mus musculus<br>GN=Mesd2 PE=1 SV=1 -<br>[MESD_MOUSE]                                           | 25.45 | 2 | 6  | 6  | 21  | 1.456 | 0.647 | 0.942 | 0.820 | 58.31  | 25.45 | 9   | 21  | 224  | 25.2  | 6.34  |
| Q6R891   | Neurabin-2 OS=Mus<br>musculus GN=Ppp19b<br>PE=1 SV=1 -<br>[NEB2_MOUSE]                                                   | 43.45 | 2 | 24 | 27 | 176 | 1.194 | 1.132 | 1.369 | 0.820 | 556.73 | 43.45 | 49  | 176 | 817  | 89.5  | 4.92  |

|          |                                                                                                                 |       |    |    |    |     |       |       |       |       |        |       |    |     |      |       |      |
|----------|-----------------------------------------------------------------------------------------------------------------|-------|----|----|----|-----|-------|-------|-------|-------|--------|-------|----|-----|------|-------|------|
| Q8BNU0   | Armadillo repeat-containing protein 6<br>OS=Mus musculus<br>GN=Armc6 PE=2 SV=1 -                                | 36.32 | 3  | 14 | 14 | 76  | 0.626 | 1.016 | 0.768 | 0.820 | 231.57 | 36.32 | 25 | 76  | 468  | 50.7  | 6.00 |
| Q9CXU0   | Mediator of RNA polymerase II transcription subunit 10 OS=Mus musculus GN=Med10 PE=1 SV=1 -                     | 5.19  | 1  | 1  | 1  | 1   | 1.265 | 1.098 | 0.823 | 0.820 | 2.60   | 5.19  | 1  | 1   | 135  | 15.7  | 6.19 |
| Q9CQ10   | Charged multivesicular body protein 3 OS=Mus musculus GN=Chmp3 PE=1 SV=3 -                                      | 25.89 | 1  | 7  | 7  | 18  | 0.942 | 0.802 | 1.050 | 0.820 | 31.58  | 25.89 | 12 | 18  | 224  | 25.2  | 5.06 |
| Q924A2   | Protein capicua homolog OS=Mus musculus GN=Cic PE=1 SV=2 - [CIC_MOUSE]                                          | 7.33  | 4  | 11 | 11 | 19  | 1.160 | 0.962 | 1.476 | 0.820 | 54.69  | 7.33  | 16 | 19  | 2510 | 258.0 | 8.02 |
| B7ZNG0-2 | Isoform 2 of Kinesin-like protein KIF7 OS=Mus musculus GN=Kif7 - [KIF7_MOUSE]                                   | 3.79  | 4  | 2  | 4  | 10  | 1.704 | 0.747 | 0.752 | 0.820 | 28.99  | 3.79  | 5  | 10  | 1347 | 151.4 | 6.44 |
| P62137   | Serine/threonine-protein phosphatase PPI-1 catalytic subunit OS=Mus musculus GN=Ppp1ca PE=1 SV=1 - [PPIA_MOUSE] | 56.06 | 1  | 3  | 16 | 138 | 1.437 | 1.268 | 1.026 | 0.820 | 428.95 | 56.06 | 30 | 138 | 330  | 37.5  | 6.33 |
| B0QZM1   | Ubiquitin-conjugating enzyme E2 J2 OS=Mus musculus GN=Ube2j2 PE=2 SV=1 -                                        | 9.48  | 4  | 2  | 2  | 8   | 1.447 | 0.819 | 0.839 | 0.820 | 22.62  | 9.48  | 3  | 8   | 232  | 25.8  | 8.78 |
| Q8CH25-2 | Isoform 2 of SAFB-like transcription modulator OS=Mus musculus GN=Sltm - [SLTM_MOUSE]                           | 12.64 | 2  | 12 | 12 | 41  | 1.108 | 0.811 | 0.987 | 0.820 | 117.20 | 12.64 | 21 | 41  | 1013 | 115.1 | 8.05 |
| Q9E5J0   | Exportin-4 OS=Mus musculus GN=Xpo4 PE=1 SV=2 - [XPO4_MOUSE]                                                     | 5.65  | 1  | 5  | 5  | 9   | 0.931 | 0.951 | 0.887 | 0.820 | 24.42  | 5.65  | 7  | 9   | 1151 | 129.9 | 5.12 |
| Q922W5   | Pyroline-5-carboxylate reductase 1, mitochondrial OS=Mus musculus GN=Pycr1 PE=1 SV=1 - [P5CR1_MOUSE]            | 28.16 | 4  | 3  | 6  | 19  | 1.089 | 0.752 | 0.690 | 0.820 | 69.47  | 28.16 | 11 | 19  | 309  | 32.4  | 6.86 |
| Q8VCG1   | Deoxyuridine triphosphatase, isoform CRA_b OS=Mus musculus GN=Dut PE=2 SV=1 - [Q8VCG1_MOUSE]                    | 39.50 | 2  | 7  | 7  | 19  | 1.599 | 0.906 | 0.897 | 0.820 | 60.95  | 39.50 | 13 | 19  | 200  | 21.2  | 9.58 |
| A2CG49   | Kalirin OS=Mus musculus GN=Kalrn PE=1 SV=1 - [KALRN_MOUSE]                                                      | 18.52 | 14 | 25 | 45 | 129 | 0.620 | 1.351 | 1.195 | 0.821 | 350.54 | 18.52 | 77 | 129 | 2964 | 336.8 | 6.07 |
| A2CG63-2 | Isoform 2 of AT-rich interactive domain-containing protein 4B OS=Mus musculus GN=Arid4b - [ARID4B_MOUSE]        | 2.61  | 3  | 3  | 3  | 5   | 0.883 | 0.993 | 0.869 | 0.821 | 12.95  | 2.61  | 3  | 5   | 1227 | 137.2 | 5.43 |
| AZAU72-2 | Isoform 2 of Armadillo repeat-containing protein 3 OS=Mus musculus GN=Armc3 - [ARMC3_MOUSE]                     | 2.19  | 3  | 1  | 1  | 1   | 1.111 | 1.080 | 1.109 | 0.821 | 2.51   | 2.19  | 1  | 1   | 684  | 74.8  | 6.05 |
| A2AJ72   | MCG130458 OS=Mus musculus GN=Fubp3 PE=4 SV=1 - [A2AJ72_MOUSE]                                                   | 51.67 | 6  | 18 | 24 | 119 | 1.159 | 0.769 | 0.855 | 0.821 | 319.17 | 51.67 | 41 | 119 | 569  | 61.4  | 8.28 |
| Q9QWW1-2 | Isoform 2 of Homer protein homolog 2 OS=Mus musculus GN=Homer2 -                                                | 37.32 | 3  | 12 | 12 | 46  | 0.793 | 1.404 | 1.049 | 0.821 | 144.69 | 37.32 | 20 | 46  | 343  | 39.4  | 6.38 |
| Q9DC11   | Plexin domain-containing protein 2 OS=Mus musculus GN=Ptxdc2 PE=1 SV=1 -                                        | 15.66 | 3  | 8  | 8  | 16  | 0.856 | 0.934 | 0.718 | 0.821 | 44.29  | 15.66 | 13 | 16  | 530  | 59.6  | 6.60 |
| E9QQ02   | VPS10 domain-containing receptor SorCS1 OS=Mus musculus GN=Sorcs1 PE=4 SV=2 - [E9QQ02_MOUSE]                    | 9.06  | 8  | 9  | 9  | 21  | 1.093 | 1.046 | 1.052 | 0.821 | 69.49  | 9.06  | 16 | 21  | 1192 | 132.6 | 7.27 |
| Q9CW79-2 | Isoform 2 of Golgin subfamily A member 1 OS=Mus musculus GN=Golga1 -                                            | 30.42 | 3  | 18 | 19 | 60  | 1.795 | 0.887 | 0.991 | 0.821 | 153.97 | 30.42 | 31 | 60  | 733  | 84.2  | 5.50 |
| Q9CQ60   | 6-phosphogluconolactonase OS=Mus musculus GN=Pgl6 PE=2 SV=1 -                                                   | 65.76 | 3  | 5  | 12 | 69  | 1.422 | 0.845 | 0.646 | 0.821 | 224.10 | 65.76 | 22 | 69  | 257  | 27.2  | 5.85 |
| Q9Z148-2 | Isoform 2 of Histone-lysine N-methyltransferase EHMT2 OS=Mus musculus GN=Ehmt2 - [EHMT2_MOUSE]                  | 3.24  | 5  | 2  | 2  | 3   | 1.126 | 1.102 | 1.050 | 0.821 | 12.04  | 3.24  | 3  | 3   | 1172 | 128.3 | 5.40 |
| P63239   | Neuroendocrine convertase 1 OS=Mus musculus GN=Pck1 PE=1 SV=1 - [NEC1_MOUSE]                                    | 21.25 | 1  | 14 | 14 | 33  | 1.051 | 1.006 | 0.734 | 0.821 | 82.15  | 21.25 | 23 | 33  | 753  | 84.1  | 6.43 |
| Q8CEE7   | Retinol dehydrogenase 13 OS=Mus musculus GN=Rdh13 PE=2 SV=1 - [RDH13_MOUSE]                                     | 16.47 | 2  | 4  | 4  | 11  | 0.903 | 0.623 | 0.649 | 0.821 | 41.75  | 16.47 | 6  | 11  | 334  | 36.4  | 8.85 |
| Q3TYD6   | Serine/threonine-protein kinase LMTK2 OS=Mus musculus GN=Lmtk2 PE=1 SV=3 - [LMTK2_MOUSE]                        | 21.21 | 1  | 22 | 23 | 67  | 1.224 | 0.969 | 1.318 | 0.821 | 209.14 | 21.21 | 38 | 67  | 1471 | 160.4 | 4.51 |

|          |                                                                                                                                  |       |   |     |     |     |       |       |       |       |         |       |     |     |      |       |       |
|----------|----------------------------------------------------------------------------------------------------------------------------------|-------|---|-----|-----|-----|-------|-------|-------|-------|---------|-------|-----|-----|------|-------|-------|
| Q9D0B5   | Thiosulfate sulfurtransferase/rhodanes e-like domain-containing protein 3 OS=Mus musculus GN=Tstd3 PE=2 SV=1 - [TSTD3_MOUSE]     | 37.58 | 1 | 5   | 5   | 20  | 1.873 | 1.056 | 1.274 | 0.822 | 54.10   | 37.58 | 8   | 20  | 157  | 17.3  | 8.13  |
| Q8BW10   | RNA-binding protein NOB1 OS=Mus musculus GN=Nob1 PE=1 SV=1 - [NOB1_MOUSE]                                                        | 4.22  | 2 | 2   | 2   | 2   | 0.824 | 0.607 | 0.750 | 0.822 | 3.95    | 4.22  | 2   | 2   | 403  | 45.4  | 7.31  |
| Q60749   | KH domain-containing, RNA-binding, signal transduction-associated protein 1 OS=Mus musculus GN=Khdrbs1 PE=1 SV=2 - [KHDR1_MOUSE] | 26.64 | 1 | 9   | 13  | 51  | 1.081 | 0.838 | 1.011 | 0.822 | 129.41  | 26.64 | 21  | 51  | 443  | 48.3  | 8.72  |
| Q8VHG2   | Angiotensin OS=Mus musculus GN=Amot PE=1 SV=3 - [AMOT_MOUSE]                                                                     | 28.86 | 7 | 21  | 27  | 81  | 1.175 | 1.099 | 1.441 | 0.822 | 247.52  | 28.86 | 44  | 81  | 1126 | 120.8 | 7.50  |
| P54728   | UV excision repair protein RAD23 homolog B OS=Mus musculus GN=Rad23b PE=1 SV=2 - [RD23B_MOUSE]                                   | 32.69 | 1 | 9   | 12  | 117 | 1.845 | 1.000 | 1.113 | 0.822 | 302.16  | 32.69 | 22  | 117 | 416  | 43.5  | 4.83  |
| E9Q616   | Protein Ahnak OS=Mus musculus GN=Ahnak PE=2 SV=1 - [E9Q616_MOUSE]                                                                | 58.59 | 2 | 141 | 146 | 454 | 1.451 | 1.892 | 0.930 | 0.822 | 1195.27 | 58.59 | 237 | 454 | 5656 | 603.9 | 6.30  |
| A2AKB4   | FERM and PDZ domain-containing protein 1 OS=Mus musculus GN=Fmpd1 PE=1 SV=1 - [FRPD1_MOUSE]                                      | 5.94  | 2 | 6   | 6   | 8   | 0.907 | 0.790 | 0.882 | 0.822 | 14.85   | 5.94  | 7   | 8   | 1549 | 169.1 | 5.16  |
| Q9D7N3   | 28S ribosomal protein S9, mitochondrial OS=Mus musculus GN=Mrs9 PE=1 SV=3 - [RT09_MOUSE]                                         | 36.41 | 1 | 12  | 12  | 25  | 0.999 | 0.679 | 0.925 | 0.822 | 65.40   | 36.41 | 18  | 25  | 390  | 44.9  | 8.81  |
| P14131   | 40S ribosomal protein S16 OS=Mus musculus GN=Rps16 PE=2 SV=4 - [RS16_MOUSE]                                                      | 67.12 | 1 | 12  | 12  | 65  | 0.632 | 0.523 | 0.731 | 0.822 | 175.43  | 67.12 | 22  | 65  | 146  | 16.4  | 10.21 |
| Q61247   | Alpha-2-antiplasmin OS=Mus musculus GN=Serpinf2 PE=1 SV=1 - [A2AP_MOUSE]                                                         | 14.26 | 3 | 7   | 7   | 22  | 2.771 | 1.299 | 0.354 | 0.822 | 43.53   | 14.26 | 11  | 22  | 491  | 54.9  | 6.30  |
| B7ZP47   | Wapal protein OS=Mus musculus GN=Wapal PE=2 SV=1 - [B7ZP47_MOUSE]                                                                | 8.46  | 3 | 9   | 9   | 15  | 1.032 | 0.682 | 1.038 | 0.822 | 42.99   | 8.46  | 12  | 15  | 1194 | 133.3 | 5.47  |
| A2A6P4   | Protein Fam104a OS=Mus musculus GN=Fam104a PE=2 SV=1 - [A2A6P4_MOUSE]                                                            | 15.68 | 1 | 2   | 2   | 5   | 0.480 | 0.480 | 0.811 | 0.823 | 7.95    | 15.68 | 3   | 5   | 185  | 19.6  | 11.18 |
| P62192   | 26S protease regulatory subunit 4 OS=Mus musculus GN=Psmc1 PE=1 SV=1 -                                                           | 59.77 | 1 | 19  | 21  | 101 | 0.915 | 0.793 | 0.776 | 0.823 | 247.07  | 59.77 | 34  | 101 | 440  | 49.2  | 6.21  |
| Q60739-2 | Isoform 2 of BAG family molecular chaperone regulator 1 OS=Mus musculus GN=Bag1 - [BAG1_MOUSE]                                   | 54.34 | 3 | 7   | 7   | 26  | 1.892 | 0.779 | 0.902 | 0.823 | 62.70   | 54.34 | 11  | 26  | 219  | 24.9  | 4.97  |
| Q99PM3   | Transcription initiation factor IIA subunit 1 OS=Mus musculus GN=Gt2a1 PE=2 SV=2 - [TF2AA_MOUSE]                                 | 7.41  | 2 | 2   | 2   | 18  | 1.811 | 0.986 | 0.999 | 0.823 | 52.53   | 7.41  | 4   | 18  | 378  | 41.6  | 4.55  |
| P62342   | Selenoprotein T OS=Mus musculus GN=Selt PE=2 SV=2 - [SELT_MOUSE]                                                                 | 22.05 | 1 | 5   | 5   | 15  | 0.783 | 0.931 | 0.756 | 0.823 | 46.77   | 22.05 | 9   | 15  | 195  | 22.3  | 8.60  |
| G3X9K8   | TP53RK-binding protein OS=Mus musculus GN=Tprkb PE=3 SV=1 - [G3X9K8_MOUSE]                                                       | 16.46 | 2 | 1   | 1   | 9   | 1.786 | 0.952 | 0.859 | 0.823 | 25.67   | 16.46 | 2   | 9   | 158  | 17.7  | 6.93  |
| Q9CWD8   | Iron-sulfur protein NUBPL OS=Mus musculus GN=Nubpl PE=2 SV=2 - [NUBPL_MOUSE]                                                     | 12.85 | 2 | 3   | 3   | 10  | 2.018 | 1.360 | 0.874 | 0.823 | 37.91   | 12.85 | 4   | 10  | 319  | 34.1  | 9.07  |
| Q9D164-2 | Isoform 2 of FXD domain-containing ion transport regulator 6 OS=Mus musculus GN=Fxyd6 - [FXYD6_MOUSE]                            | 46.24 | 2 | 3   | 3   | 34  | 0.601 | 1.129 | 0.669 | 0.823 | 113.11  | 46.24 | 3   | 34  | 93   | 10.3  | 5.11  |
| G5E843   | Roundabout homolog 1 OS=Mus musculus GN=Robo1 PE=4 SV=1 - [G5E843_MOUSE]                                                         | 19.85 | 2 | 25  | 26  | 63  | 1.103 | 0.701 | 0.878 | 0.824 | 186.34  | 19.85 | 42  | 63  | 1612 | 176.3 | 6.19  |
| Q91JR9   | Nuclear receptor-interacting protein 3 OS=Mus musculus GN=Nrip3 PE=2 SV=1 -                                                      | 6.67  | 2 | 2   | 2   | 4   | 1.177 | 0.828 | 1.005 | 0.824 | 8.98    | 6.67  | 4   | 4   | 240  | 26.9  | 8.50  |
| Q61QX8   | Protein Zfp219 OS=Mus musculus GN=Zfp219 PE=2 SV=1 - [Q61QX8_MOUSE]                                                              | 12.40 | 1 | 4   | 4   | 8   | 1.065 | 0.854 | 0.882 | 0.824 | 16.73   | 12.40 | 5   | 8   | 726  | 77.7  | 9.17  |
| F6ZQL0   | Protein LYRIC (Fragment) OS=Mus musculus GN=Mtdh PE=4 SV=1 - [F6ZQL0_MOUSE]                                                      | 34.09 | 1 | 1   | 6   | 32  | 0.791 | 0.803 | 0.912 | 0.824 | 87.39   | 34.09 | 11  | 32  | 220  | 24.4  | 9.31  |
| Q92116   | SH3 domain-binding protein 4 OS=Mus musculus GN=Sh3bp4 PE=2 SV=1 -                                                               | 12.89 | 1 | 10  | 10  | 20  | 1.053 | 1.388 | 0.831 | 0.824 | 45.70   | 12.89 | 16  | 20  | 962  | 107.5 | 7.34  |

|          |                                                                                                          |       |    |    |    |     |       |       |       |       |        |       |    |     |      |       |      |
|----------|----------------------------------------------------------------------------------------------------------|-------|----|----|----|-----|-------|-------|-------|-------|--------|-------|----|-----|------|-------|------|
| Q9DBN5   | Lon protease homolog 2, peroxisomal OS=Mus musculus GN=Lonp2 PE=2 SV=1 - [LONP2_MOUSE]                   | 8.22  | 4  | 6  | 7  | 10  | 0.874 | 0.823 | 0.692 | 0.824 | 19.42  | 8.22  | 10 | 10  | 852  | 94.5  | 7.23 |
| E9Q5E0   | Myocyte-specific enhancer factor 2D OS=Mus musculus GN=Mef2d PE=2 SV=1 - [E9Q5E0_MOUSE]                  | 17.79 | 5  | 7  | 7  | 30  | 0.983 | 1.157 | 1.286 | 0.824 | 84.67  | 17.79 | 13 | 30  | 506  | 54.1  | 8.38 |
| E9QNH6   | Unconventional myosin-1b OS=Mus musculus GN=Myo1b PE=2 SV=1 - [E9QNH6_MOUSE]                             | 26.90 | 6  | 19 | 24 | 60  | 0.620 | 0.981 | 0.998 | 0.824 | 179.91 | 26.90 | 39 | 60  | 1078 | 125.0 | 9.14 |
| Q924Z4   | Ceramide synthase 2 OS=Mus musculus GN=Cers2 PE=1 SV=1 - [CERS2_MOUSE]                                   | 11.32 | 4  | 3  | 3  | 13  | 0.700 | 0.483 | 0.783 | 0.824 | 42.46  | 11.32 | 5  | 13  | 380  | 45.0  | 8.75 |
| Q9QWV9   | Cyclin-T1 OS=Mus musculus GN=Ccnt1 PE=1 SV=3 - [CCNT1_MOUSE]                                             | 3.87  | 2  | 1  | 2  | 4   | 1.315 | 0.514 | 1.108 | 0.824 | 12.86  | 3.87  | 4  | 4   | 724  | 80.5  | 8.68 |
| P20065-2 | Isoform Short of Thymosin beta-4 OS=Mus musculus GN=Tmsb4x - [TYB4_MOUSE]                                | 45.45 | 3  | 3  | 4  | 21  | 1.500 | 1.506 | 1.622 | 0.824 | 28.73  | 45.45 | 6  | 21  | 44   | 5.0   | 5.06 |
| Q61553   | Fascin OS=Mus musculus GN=Fscn1 PE=1 SV=4 - [FSCN1_MOUSE]                                                | 49.70 | 5  | 24 | 24 | 226 | 1.025 | 0.856 | 0.910 | 0.824 | 660.53 | 49.70 | 45 | 226 | 493  | 54.5  | 6.89 |
| B1AU74   | Motile sperm domain-containing protein 2 OS=Mus musculus GN=Mospd2 PE=2 SV=1 - [B1AU74_MOUSE]            | 11.58 | 5  | 6  | 6  | 14  | 0.889 | 0.720 | 0.746 | 0.824 | 45.97  | 11.58 | 10 | 14  | 518  | 59.8  | 5.76 |
| Q99JT9   | 1,2-dihydroxy-3-keto-5-methylthiopentene dioxygenase OS=Mus musculus GN=Adi1 PE=1 SV=1 - [MTND_MOUSE]    | 24.58 | 2  | 3  | 4  | 21  | 2.069 | 1.013 | 0.761 | 0.824 | 68.91  | 24.58 | 6  | 21  | 179  | 21.5  | 5.50 |
| Q99M11   | ELKS/Rab6-interacting/CAST family member 1 OS=Mus musculus GN=Erc1 PE=1 SV=1 - [RBEI2_MOUSE]             | 42.86 | 5  | 39 | 50 | 202 | 1.259 | 0.895 | 1.188 | 0.824 | 510.19 | 42.86 | 81 | 202 | 1120 | 128.3 | 5.87 |
| Q99L59   | X-linked lymphocyte-regulated protein 3A OS=Mus musculus GN=Xlr3a PE=2 SV=1 - [Q99L59_MOUSE]             | 7.69  | 5  | 2  | 2  | 2   | 0.999 | 1.074 | 0.784 | 0.825 | 2.50   | 7.69  | 2  | 2   | 221  | 25.7  | 7.85 |
| Q9D8S3   | ADP-ribosylation factor GTPase-activating protein 3 OS=Mus musculus GN=Arfgap3 PE=2 SV=2 - [ARFG3_MOUSE] | 30.59 | 1  | 14 | 15 | 37  | 1.172 | 0.855 | 0.847 | 0.825 | 106.00 | 30.59 | 26 | 37  | 523  | 57.4  | 8.47 |
| G5E8A7   | Protein Smaug homolog 2 OS=Mus musculus GN=Samd4b PE=4 SV=1 - [G5E8A7_MOUSE]                             | 19.21 | 2  | 8  | 8  | 31  | 0.915 | 0.809 | 0.836 | 0.825 | 95.40  | 19.21 | 15 | 31  | 687  | 74.9  | 6.83 |
| E9QP99   | Golgin subfamily A member 3 OS=Mus musculus GN=Golga3 PE=2 SV=1 - [E9QP99_MOUSE]                         | 41.43 | 4  | 48 | 49 | 150 | 1.656 | 0.812 | 1.133 | 0.825 | 470.23 | 41.43 | 82 | 150 | 1487 | 167.2 | 5.38 |
| O54781   | SRSF protein kinase 2 OS=Mus musculus GN=Srpk2 PE=1 SV=2 - [SRPK2_MOUSE]                                 | 24.38 | 2  | 10 | 14 | 56  | 0.663 | 0.866 | 0.905 | 0.825 | 153.65 | 24.38 | 23 | 56  | 681  | 76.7  | 4.91 |
| Q9D338   | 39S ribosomal protein L19, mitochondrial OS=Mus musculus GN=Mpl19 PE=2 SV=1 - [RM19_MOUSE]               | 33.22 | 1  | 7  | 7  | 21  | 0.756 | 0.827 | 0.836 | 0.825 | 60.04  | 33.22 | 12 | 21  | 292  | 33.6  | 9.44 |
| Q8BFQ4   | WD repeat-containing protein 82 OS=Mus musculus GN=Wdr82 PE=1 SV=1 - [Q8BFQ4_MOUSE]                      | 18.21 | 1  | 7  | 7  | 15  | 0.965 | 1.058 | 0.752 | 0.825 | 37.07  | 18.21 | 10 | 15  | 313  | 35.1  | 7.69 |
| Q8K4E0   | Alstrom syndrome protein 1 homolog OS=Mus musculus GN=Alms1 PE=1 SV=2 - [ALMS1_MOUSE]                    | 2.06  | 1  | 4  | 4  | 5   | 0.711 | 1.160 | 0.975 | 0.825 | 6.42   | 2.06  | 4  | 5   | 3251 | 360.0 | 6.39 |
| E9QP09   | Cullin-9 OS=Mus musculus GN=Cul9 PE=3 SV=1 - [E9QP09_MOUSE]                                              | 12.10 | 2  | 6  | 21 | 51  | 0.564 | 1.136 | 0.969 | 0.825 | 140.09 | 12.10 | 34 | 51  | 2520 | 281.1 | 5.59 |
| Q5IR70-2 | Isoform 2 of Cancer-associated gene 1 protein homolog OS=Mus musculus GN=Cage1 - [CAGE1_MOUSE]           | 3.69  | 3  | 2  | 3  | 3   | 0.596 | 1.157 | 0.683 | 0.825 | 7.90   | 3.69  | 3  | 3   | 515  | 58.7  | 5.26 |
| E9PV16   | Adenosylhomocysteinase OS=Mus musculus GN=Ahcyl2 PE=2 SV=1 - [E9PV16_MOUSE]                              | 43.86 | 10 | 1  | 32 | 258 | 1.810 | 0.845 | 1.092 | 0.825 | 688.62 | 43.86 | 58 | 258 | 643  | 69.9  | 6.79 |
| Q07113   | Cation-independent mannose-6-phosphate receptor OS=Mus musculus GN=Igf2r PE=1 SV=1 - [MPRI_MOUSE]        | 10.11 | 1  | 20 | 20 | 37  | 0.853 | 0.965 | 0.859 | 0.825 | 97.95  | 10.11 | 30 | 37  | 2483 | 273.6 | 5.71 |
| Q9CRAS   | Golgi phosphoprotein 3 OS=Mus musculus GN=Golph3 PE=2 SV=1 - [GOLP3_MOUSE]                               | 27.52 | 3  | 5  | 6  | 18  | 0.660 | 1.023 | 0.766 | 0.825 | 52.05  | 27.52 | 11 | 18  | 298  | 33.7  | 6.44 |
| Q8R205   | Zinc finger CCH domain-containing protein 10 OS=Mus musculus GN=Zc3h10 PE=2 SV=1 - [ZC3HA_MOUSE]         | 12.18 | 1  | 2  | 2  | 6   | 1.546 | 1.117 | 1.151 | 0.825 | 5.18   | 12.18 | 3  | 6   | 435  | 46.1  | 7.62 |

|          |                                                                                                                                     |       |    |    |    |     |        |       |       |       |        |       |    |     |      |       |       |
|----------|-------------------------------------------------------------------------------------------------------------------------------------|-------|----|----|----|-----|--------|-------|-------|-------|--------|-------|----|-----|------|-------|-------|
| P14148   | 60S ribosomal protein L7<br>OS=Mus musculus<br>GN=Rpl7 PE=2 SV=2 -<br>[RL7_MOUSE]                                                   | 61.48 | 2  | 20 | 22 | 98  | 0.558  | 0.790 | 0.688 | 0.825 | 265.96 | 61.48 | 42 | 98  | 270  | 31.4  | 10.89 |
| Q9QY31   | Zinc finger protein SNAI3<br>OS=Mus musculus<br>GN=SnaI3 PE=2 SV=1 -<br>[SNAI3_MOUSE]                                               | 6.62  | 1  | 1  | 1  | 3   | 2.257  | 1.548 | 1.111 | 0.825 | 0.00   | 6.62  | 1  | 3   | 287  | 31.6  | 8.65  |
| Q9D0A3   | UPF052 protein C15orf38<br>homolog OS=Mus<br>musculus PE=2 SV=1 -<br>[CO038_MOUSE]                                                  | 38.50 | 1  | 8  | 8  | 38  | 1.925  | 0.821 | 1.176 | 0.825 | 99.89  | 38.50 | 15 | 38  | 226  | 25.2  | 5.19  |
| Q9DCJ9   | N-acetylneuraminase lyase<br>OS=Mus musculus<br>GN=Npl PE=1 SV=1 -<br>[NPL_MOUSE]                                                   | 50.94 | 1  | 12 | 12 | 41  | 1.351  | 0.947 | 0.742 | 0.826 | 125.33 | 50.94 | 21 | 41  | 320  | 35.1  | 8.03  |
| D3YTQ4   | High affinity cGMP-specific<br>3',5'-cyclic<br>phosphodiesterase 9A<br>OS=Mus musculus<br>GN=Pde9a PE=2 SV=1 -<br>[PDE9A_MOUSE]     | 10.24 | 4  | 4  | 4  | 8   | 1.026  | 0.706 | 0.843 | 0.826 | 24.65  | 10.24 | 6  | 8   | 508  | 58.8  | 6.24  |
| P83870   | PHD finger-like domain-<br>containing protein 5A<br>OS=Mus musculus<br>GN=Phf5a PE=1 SV=1 -<br>[PHF5A_MOUSE]                        | 48.18 | 1  | 7  | 7  | 21  | 1.932  | 0.790 | 1.134 | 0.826 | 46.90  | 48.18 | 13 | 21  | 110  | 12.4  | 8.41  |
| Q9WVA3   | Mitotic checkpoint protein<br>BUB3 OS=Mus musculus<br>GN=Bub3 PE=2 SV=2 -<br>[BUB3_MOUSE]                                           | 29.75 | 1  | 8  | 8  | 17  | 0.749  | 0.840 | 0.734 | 0.826 | 43.36  | 29.75 | 12 | 17  | 326  | 36.9  | 6.84  |
| F6ZKC7   | Cleavage stimulation factor<br>subunit 2 (Fragment)<br>OS=Mus musculus<br>GN=Cstf2 PE=4 SV=1 -<br>[F6ZKC7_MOUSE]                    | 16.60 | 1  | 1  | 3  | 15  | 2.260  | 1.061 | 0.953 | 0.826 | 44.31  | 16.60 | 6  | 15  | 259  | 26.6  | 8.32  |
| P11859   | Angiotensinogen OS=Mus<br>musculus GN=Agt PE=1<br>SV=1 - [ANGT_MOUSE]                                                               | 26.00 | 1  | 1  | 9  | 28  | 1.442  | 1.480 | 1.209 | 0.826 | 75.63  | 26.00 | 16 | 28  | 477  | 52.0  | 5.44  |
| Q99LI5   | Zinc finger protein 281<br>OS=Mus musculus<br>GN=Znf281 PE=1 SV=1 -<br>[ZN281_MOUSE]                                                | 2.58  | 1  | 2  | 2  | 3   | 1.687  | 0.817 | 0.980 | 0.826 | 9.33   | 2.58  | 2  | 3   | 893  | 96.6  | 8.56  |
| P32067   | Lupus La protein homolog<br>OS=Mus musculus<br>GN=Sob PE=2 SV=1 -<br>[LA_MOUSE]                                                     | 50.84 | 4  | 21 | 21 | 66  | 0.746  | 0.884 | 0.856 | 0.826 | 182.81 | 50.84 | 35 | 66  | 415  | 47.7  | 9.77  |
| Q8C9B9   | Death-inducer obliterator 1<br>OS=Mus musculus<br>GN=Dido1 PE=1 SV=4 -<br>[DIDO1_MOUSE]                                             | 6.91  | 3  | 10 | 10 | 30  | 0.978  | 1.080 | 0.958 | 0.826 | 82.38  | 6.91  | 17 | 30  | 2256 | 247.0 | 7.91  |
| P35276   | Ras-related protein Rab-<br>3D OS=Mus musculus<br>GN=Rab3d PE=1 SV=1 -<br>[RAB3D_MOUSE]                                             | 47.03 | 4  | 2  | 10 | 125 | 2.740  | 1.908 | 1.081 | 0.826 | 381.57 | 47.03 | 17 | 125 | 219  | 24.4  | 4.93  |
| Q9QUG9   | RAS guanyl-releasing<br>protein 2 OS=Mus<br>musculus GN=Rasgrp2<br>PE=1 SV=2 -                                                      | 29.61 | 11 | 17 | 17 | 61  | 0.458  | 0.521 | 1.112 | 0.826 | 162.04 | 29.61 | 28 | 61  | 608  | 69.4  | 7.66  |
| Q04750   | DNA topoisomerase 1<br>OS=Mus musculus<br>GN=Top1 PE=1 SV=2 -<br>[TOP1_MOUSE]                                                       | 21.25 | 2  | 16 | 16 | 38  | 0.596  | 0.789 | 0.817 | 0.827 | 92.47  | 21.25 | 28 | 38  | 767  | 90.8  | 9.33  |
| E9QKY4   | FYVE, RhoGEF and PH<br>domain-containing protein<br>5 OS=Mus musculus<br>GN=Fgd5 PE=2 SV=1 -<br>[E9QKY4_MOUSE]                      | 4.69  | 3  | 4  | 5  | 10  | 1.295  | 1.008 | 0.858 | 0.827 | 21.83  | 4.69  | 7  | 10  | 1514 | 166.8 | 4.91  |
| Q6DFY2   | Opioid binding protein/cell<br>adhesion molecule-like<br>OS=Mus musculus<br>GN=Opclm PE=2 SV=1 -<br>[Q6DFY2_MOUSE]                  | 42.73 | 1  | 2  | 16 | 123 | 0.839  | 1.090 | 1.002 | 0.827 | 377.08 | 42.73 | 30 | 123 | 337  | 37.1  | 6.68  |
| Q8BQ33   | Treslin OS=Mus musculus<br>GN=Trrc PE=2 SV=2 -<br>[TTRC_MOUSE]                                                                      | 1.22  | 1  | 2  | 3  | 3   | 1.630  | 1.406 | 0.579 | 0.827 | 6.90   | 1.22  | 3  | 3   | 1889 | 208.2 | 7.94  |
| O88792   | Junctional adhesion<br>molecule A OS=Mus<br>musculus GN=F11r PE=1<br>SV=2 - [JAM1_MOUSE]                                            | 12.00 | 1  | 4  | 4  | 7   | 0.917  | 0.974 | 0.821 | 0.827 | 18.88  | 12.00 | 5  | 7   | 300  | 32.4  | 6.77  |
| Q8CDM1   | ATPase family AAA domain-<br>containing protein 2<br>OS=Mus musculus<br>GN=Atad2 PE=1 SV=1 -<br>[ATAD2_MOUSE]                       | 1.06  | 2  | 1  | 1  | 1   | 10.527 | 1.441 | 1.052 | 0.827 | 3.14   | 1.06  | 1  | 1   | 1040 | 117.9 | 6.89  |
| Q6PDX6   | E3 ubiquitin-protein ligase<br>Rnf220 OS=Mus musculus<br>GN=Rnf220 PE=1 SV=1 -<br>[RNF220_MOUSE]                                    | 13.07 | 6  | 7  | 7  | 23  | 1.444  | 0.802 | 0.937 | 0.827 | 48.36  | 13.07 | 12 | 23  | 566  | 62.7  | 6.04  |
| F8VQL9   | Nuclear receptor<br>corepressor 2 OS=Mus<br>musculus GN=Ncor2 PE=2<br>SV=1 - [F8VQL9_MOUSE]                                         | 15.52 | 12 | 23 | 31 | 59  | 1.076  | 0.766 | 0.983 | 0.827 | 182.56 | 15.52 | 49 | 59  | 2507 | 273.2 | 7.44  |
| Q5SQP1-2 | Isoform 2 of HORMA<br>domain-containing protein<br>2 OS=Mus musculus<br>GN=Hormad2 -<br>[HORM2_MOUSE]                               | 5.67  | 2  | 1  | 1  | 3   | 1.411  | 0.895 | 1.644 | 0.827 | 0.00   | 5.67  | 1  | 3   | 247  | 28.2  | 6.93  |
| Q8BHN0   | Protein phosphatase 1L<br>OS=Mus musculus<br>GN=Ppm1l PE=1 SV=1 -<br>[PPM1L_MOUSE]                                                  | 13.89 | 3  | 5  | 5  | 12  | 0.770  | 0.728 | 0.748 | 0.827 | 31.66  | 13.89 | 9  | 12  | 360  | 41.0  | 5.99  |
| Q9WV19-2 | Isoform JIP-1a of C-Jun-<br>amino-terminal kinase-<br>interacting protein 1<br>OS=Mus musculus<br>GN=Mapk8ip1 -<br>[MAPK8IP1_MOUSE] | 27.58 | 4  | 3  | 11 | 34  | 1.536  | 0.782 | 0.906 | 0.828 | 101.07 | 27.58 | 17 | 34  | 660  | 71.9  | 4.84  |

|          |                                                                                                                            |       |   |    |    |     |       |       |       |       |         |       |     |     |      |       |       |
|----------|----------------------------------------------------------------------------------------------------------------------------|-------|---|----|----|-----|-------|-------|-------|-------|---------|-------|-----|-----|------|-------|-------|
| Q3UH10   | Serine-rich coiled-coil domain-containing protein 2 OS=Mus musculus GN=Ccser2 PE=1 SV=1 - [CCSE2_MOUSE]                    | 6.84  | 2 | 4  | 5  | 7   | 1.051 | 0.700 | 1.219 | 0.828 | 16.65   | 6.84  | 7   | 7   | 833  | 92.9  | 6.46  |
| Q3UJ80   | Protein SF3b2 OS=Mus musculus GN=SF3b2 PE=2 SV=1 - [Q3UJ80_MOUSE]                                                          | 23.92 | 1 | 19 | 19 | 60  | 0.714 | 0.799 | 0.983 | 0.828 | 157.72  | 23.92 | 33  | 60  | 878  | 98.1  | 5.62  |
| P54130   | Fibroblast growth factor 9 OS=Mus musculus GN=Fgf9 PE=2 SV=2 - [FGF9_MOUSE]                                                | 6.25  | 1 | 1  | 1  | 1   | 0.334 | 2.653 | 0.714 | 0.828 | 0.00    | 6.25  | 1   | 1   | 208  | 23.4  | 7.58  |
| P35979   | 60S ribosomal protein L12 OS=Mus musculus GN=Rpl12 PE=1 SV=2 - [RL12_MOUSE]                                                | 67.27 | 3 | 9  | 9  | 76  | 0.906 | 0.788 | 0.760 | 0.828 | 238.53  | 67.27 | 16  | 76  | 165  | 17.8  | 9.42  |
| E9Q1V2   | Copine-5 (Fragment) OS=Mus musculus GN=Cpne5 PE=2 SV=1 - [E9Q1V2_MOUSE]                                                    | 35.98 | 2 | 1  | 6  | 25  | 1.023 | 1.740 | 2.234 | 0.828 | 68.40   | 35.98 | 10  | 25  | 214  | 23.7  | 5.11  |
| Q6NVG1   | Lysophospholipid acyltransferase LPCAT4 OS=Mus musculus GN=Lpcat4 PE=1 SV=1 - [LPCT4_MOUSE]                                | 19.85 | 1 | 7  | 7  | 15  | 0.595 | 0.838 | 1.104 | 0.828 | 48.71   | 19.85 | 12  | 15  | 524  | 57.1  | 8.75  |
| Q8R0W6   | NEDD4 family-interacting protein 1 OS=Mus musculus GN=Ndfip1 PE=1 SV=1 -                                                   | 24.43 | 1 | 3  | 3  | 5   | 0.775 | 0.738 | 0.772 | 0.828 | 11.77   | 24.43 | 3   | 5   | 221  | 24.9  | 4.61  |
| Q9D0C1   | E3 ubiquitin-protein ligase RNF115 OS=Mus musculus GN=Rnf115 PE=1 SV=1 - [RN115_MOUSE]                                     | 4.59  | 1 | 2  | 2  | 4   | 1.534 | 0.933 | 1.194 | 0.828 | 8.49    | 4.59  | 2   | 4   | 305  | 33.8  | 5.83  |
| Q61743   | ATP-sensitive inward rectifier potassium channel 11 OS=Mus musculus GN=Kcnj11 PE=2 SV=1 - [IRK11_MOUSE]                    | 11.54 | 1 | 4  | 4  | 5   | 1.521 | 1.080 | 0.976 | 0.828 | 11.65   | 11.54 | 5   | 5   | 390  | 43.5  | 8.19  |
| B1AVU6   | Protein Gm436 OS=Mus musculus GN=Gm436 PE=4 SV=1 - [B1AVU6_MOUSE]                                                          | 4.42  | 1 | 1  | 1  | 1   | 0.529 | 0.448 | 0.838 | 0.828 | 2.64    | 4.42  | 1   | 1   | 407  | 45.8  | 8.44  |
| Q9QYCI-2 | Isoform 2 of Pecanex-like protein 1 OS=Mus musculus GN=Pcnx - [PCX1_MOUSE]                                                 | 3.37  | 2 | 6  | 7  | 13  | 0.696 | 0.644 | 0.910 | 0.828 | 28.78   | 3.37  | 10  | 13  | 2252 | 248.0 | 7.20  |
| Q8BYZ1   | ABI gene family member 3 OS=Mus musculus GN=Abi3 PE=2 SV=3 - [ABI3_MOUSE]                                                  | 11.72 | 3 | 3  | 4  | 20  | 1.447 | 1.077 | 1.116 | 0.828 | 51.15   | 11.72 | 7   | 20  | 367  | 39.1  | 5.54  |
| AZT4N6   | Programmed cell death 2 alternative transcript OS=Mus musculus GN=Pdcd2 PE=2 SV=1 - [AZT4N6_MOUSE]                         | 17.05 | 2 | 4  | 4  | 4   | 1.197 | 1.110 | 0.872 | 0.828 | 14.08   | 17.05 | 4   | 4   | 258  | 28.7  | 5.36  |
| Q6P5D3-2 | Isoform 2 of Putative ATP-dependent RNA helicase DHX57 OS=Mus musculus GN=Dhx57 - [DHX57_MOUSE]                            | 8.54  | 5 | 8  | 11 | 27  | 1.213 | 0.898 | 0.965 | 0.828 | 83.79   | 8.54  | 18  | 27  | 1335 | 149.8 | 7.75  |
| Q8BZL4   | Probable G-protein coupled receptor 22 OS=Mus musculus GN=Gpr22 PE=2 SV=1 - [GPR22_MOUSE]                                  | 2.31  | 2 | 1  | 1  | 2   | 0.682 | 1.472 | 1.269 | 0.828 | 4.07    | 2.31  | 2   | 2   | 432  | 49.0  | 9.28  |
| Q91WV0   | Protein Dr1 OS=Mus musculus GN=Dr1 PE=2 SV=1 - [NC2B_MOUSE]                                                                | 15.34 | 1 | 3  | 3  | 9   | 1.462 | 0.933 | 0.924 | 0.828 | 23.29   | 15.34 | 6   | 9   | 176  | 19.4  | 4.75  |
| Q8VIF2   | Serine protease 42 OS=Mus musculus GN=Prss42 PE=2 SV=1 - [PR542_MOUSE]                                                     | 3.88  | 1 | 1  | 2  | 3   | 1.072 | 1.240 | 0.794 | 0.828 | 6.21    | 3.88  | 3   | 3   | 335  | 36.7  | 8.48  |
| Q8BJU0-2 | Isoform 2 of Small glutamine-rich tetratricopeptide repeat-containing protein alpha OS=Mus musculus GN=PCX1 - [PCX1_MOUSE] | 31.53 | 3 | 9  | 9  | 43  | 1.199 | 0.935 | 0.758 | 0.828 | 129.12  | 31.53 | 16  | 43  | 314  | 34.2  | 5.06  |
| E9Q1L5   | Sentrin-specific protease 7 OS=Mus musculus GN=Serp7 PE=2 SV=1 - [E9Q1L5_MOUSE]                                            | 12.67 | 3 | 9  | 9  | 17  | 1.069 | 0.907 | 0.924 | 0.829 | 45.41   | 12.67 | 14  | 17  | 1010 | 113.3 | 6.47  |
| Q3UL36   | Arginine and glutamate-rich protein 1 OS=Mus musculus GN=Arglu1 PE=1 SV=2 -                                                | 16.61 | 2 | 6  | 7  | 37  | 0.915 | 0.927 | 1.050 | 0.829 | 80.80   | 16.61 | 12  | 37  | 271  | 32.9  | 10.36 |
| Q9Z315   | U4/U6,U5 tri-snrNP-associated protein 1 OS=Mus musculus GN=Sart1 PE=2 SV=1 - [SNUT1_MOUSE]                                 | 18.86 | 1 | 11 | 11 | 25  | 0.772 | 0.712 | 0.949 | 0.829 | 77.39   | 18.86 | 18  | 25  | 806  | 90.8  | 5.82  |
| Q8BM72   | Heat shock 70 kDa protein 13 OS=Mus musculus GN=Hspa13 PE=2 SV=1 - [HSP13_MOUSE]                                           | 29.30 | 3 | 13 | 13 | 45  | 0.804 | 0.999 | 0.616 | 0.829 | 116.85  | 29.30 | 25  | 45  | 471  | 51.7  | 5.63  |
| Q8V159   | Pecanex-like protein 3 OS=Mus musculus GN=Pcnx3 PE=1 SV=2 - [PCX3_MOUSE]                                                   | 6.90  | 4 | 10 | 10 | 12  | 1.355 | 0.837 | 1.048 | 0.829 | 36.05   | 6.90  | 10  | 12  | 2028 | 221.4 | 6.62  |
| F8VQE2   | Kinesin-like protein KIF21B OS=Mus musculus GN=Kif21b PE=2 SV=1 - [F8VQE2_MOUSE]                                           | 11.76 | 4 | 11 | 16 | 45  | 0.603 | 0.711 | 0.814 | 0.829 | 118.74  | 11.76 | 25  | 45  | 1624 | 181.3 | 6.96  |
| P57780   | Alpha-actinin-4 OS=Mus musculus GN=Actn4 PE=1 SV=1 - [ACTN4_MOUSE]                                                         | 74.56 | 6 | 20 | 59 | 522 | 1.088 | 1.851 | 1.243 | 0.829 | 1497.25 | 74.56 | 105 | 522 | 912  | 104.9 | 5.41  |



|          |                                                                                                                       |       |    |    |    |     |       |       |       |       |        |       |    |     |      |       |       |
|----------|-----------------------------------------------------------------------------------------------------------------------|-------|----|----|----|-----|-------|-------|-------|-------|--------|-------|----|-----|------|-------|-------|
| A3KG01   | Eph receptor B2 OS=Mus musculus GN=Ephb2 PE=2 SV=2 - [A3KG01_MOUSE]                                                   | 19.98 | 8  | 13 | 17 | 39  | 0.546 | 0.560 | 0.719 | 0.829 | 107.56 | 19.98 | 28 | 39  | 986  | 109.8 | 5.71  |
| Q7TNV0   | Protein DEK OS=Mus musculus GN=Dek PE=1 SV=1 - [DEK_MOUSE]                                                            | 24.47 | 3  | 9  | 9  | 33  | 0.641 | 0.953 | 0.908 | 0.829 | 86.90  | 24.47 | 13 | 33  | 380  | 43.1  | 6.86  |
| G3UWD4   | Periplin 1, isoform CRA_b OS=Mus musculus GN=Pphl1 PE=4 SV=1 - [G3UWD4_MOUSE]                                         | 6.14  | 5  | 2  | 2  | 3   | 1.333 | 0.791 | 1.059 | 0.829 | 7.82   | 6.14  | 3  | 3   | 293  | 33.8  | 6.32  |
| Q60596   | DNA repair protein XRCC1 OS=Mus musculus GN=Xrcc1 PE=1 SV=2 - [XRCC1_MOUSE]                                           | 8.24  | 1  | 5  | 5  | 10  | 0.670 | 0.648 | 0.906 | 0.829 | 25.89  | 8.24  | 8  | 10  | 631  | 68.9  | 6.33  |
| D3YXK2   | Scaffold attachment factor B1 OS=Mus musculus GN=Safb PE=1 SV=2 - [SAFB1_MOUSE]                                       | 25.40 | 4  | 11 | 23 | 63  | 0.929 | 0.883 | 1.056 | 0.829 | 148.22 | 25.40 | 33 | 63  | 937  | 105.0 | 5.35  |
| Q9QYE6   | Golgin subfamily A member 5 OS=Mus musculus GN=Golga5 PE=1 SV=2 -                                                     | 33.33 | 1  | 18 | 19 | 51  | 1.554 | 0.930 | 0.920 | 0.830 | 176.65 | 33.33 | 30 | 51  | 729  | 82.3  | 6.23  |
| Q673H1   | Tumor suppressor candidate gene 1 protein homolog OS=Mus musculus GN=Tusc1 PE=2 SV=1 - [TUSC1_MOUSE]                  | 13.17 | 1  | 2  | 2  | 5   | 0.908 | 0.732 | 1.245 | 0.830 | 23.37  | 13.17 | 3  | 5   | 205  | 22.7  | 11.09 |
| Q9CS74   | Protein SGT1 homolog OS=Mus musculus GN=Ecd PE=2 SV=2 - [SGT1_MOUSE]                                                  | 3.28  | 1  | 2  | 2  | 4   | 1.744 | 1.159 | 1.105 | 0.830 | 9.34   | 3.28  | 2  | 4   | 641  | 71.7  | 4.94  |
| Q9D303   | Uncharacterized protein OS=Mus musculus GN=Gm8989 PE=2 SV=1 - [Q9D303_MOUSE]                                          | 6.23  | 1  | 1  | 1  | 1   | 1.646 | 1.925 | 0.703 | 0.830 | 0.00   | 6.23  | 1  | 1   | 353  | 41.0  | 7.78  |
| Q9D7M1   | Glucose-induced degradation protein 8 homolog OS=Mus musculus GN=Gid8 PE=2 SV=1 - [GID8_MOUSE]                        | 50.00 | 1  | 7  | 7  | 34  | 1.446 | 1.078 | 0.943 | 0.830 | 159.59 | 50.00 | 12 | 34  | 228  | 26.8  | 4.97  |
| P62317   | Small nuclear ribonucleoprotein Sm D2 OS=Mus musculus GN=Snrpd2 PE=1 SV=1 -                                           | 46.61 | 2  | 6  | 6  | 29  | 1.369 | 0.901 | 0.844 | 0.830 | 96.47  | 46.61 | 11 | 29  | 118  | 13.5  | 9.91  |
| O08784   | Treacle protein OS=Mus musculus GN=Tcof1 PE=1 SV=1 - [TCOF_MOUSE]                                                     | 21.44 | 5  | 23 | 23 | 65  | 1.013 | 0.738 | 0.967 | 0.830 | 209.19 | 21.44 | 37 | 65  | 1320 | 134.9 | 9.35  |
| Q9D8N0   | Elongation factor 1-gamma OS=Mus musculus GN=Eef1g PE=1 SV=3 - [E1G_MOUSE]                                            | 43.71 | 1  | 17 | 17 | 146 | 0.563 | 0.728 | 0.699 | 0.830 | 351.68 | 43.71 | 31 | 146 | 437  | 50.0  | 6.74  |
| Q9D8E6   | 60S ribosomal protein L4 OS=Mus musculus GN=Rpl4 PE=1 SV=3 - [RL4_MOUSE]                                              | 44.63 | 1  | 21 | 21 | 121 | 0.490 | 0.572 | 0.691 | 0.830 | 313.49 | 44.63 | 35 | 121 | 419  | 47.1  | 11.00 |
| Q00P19   | Heterogeneous nuclear ribonucleoprotein U-like protein 2 OS=Mus musculus GN=Hnnpul2 PE=1 SV=2 - [HNPUL2_MOUSE]        | 36.64 | 1  | 24 | 24 | 118 | 0.723 | 0.859 | 0.893 | 0.830 | 346.77 | 36.64 | 38 | 118 | 745  | 84.9  | 4.89  |
| D9J2V6   | Pre-B-cell leukemia transcription factor 1 OS=Mus musculus GN=Pbx1 PE=2 SV=1 - [D9J2V6_MOUSE]                         | 27.14 | 11 | 4  | 6  | 9   | 0.590 | 1.654 | 1.095 | 0.830 | 33.43  | 27.14 | 8  | 9   | 339  | 37.0  | 6.60  |
| P97822-2 | Isoform 2 of Acidic leucine-rich nuclear phosphoprotein 32 family member E OS=Mus musculus GN=Anp32e - [ANP32E_MOUSE] | 37.10 | 8  | 6  | 8  | 41  | 1.257 | 0.988 | 1.092 | 0.830 | 127.40 | 37.10 | 14 | 41  | 248  | 28.2  | 3.87  |
| E9PXX7   | Thioredoxin domain-containing protein 5 OS=Mus musculus GN=Tnfrdc5 PE=2 SV=1 - [E9PXX7_MOUSE]                         | 62.50 | 2  | 15 | 17 | 60  | 1.259 | 1.184 | 0.922 | 0.830 | 158.85 | 62.50 | 29 | 60  | 344  | 38.5  | 5.39  |
| Q7M6Y3-6 | Isoform 6 of Phosphatidylinositol-binding clathrin assembly protein OS=Mus musculus GN=Picalm - [PICALM_MOUSE]        | 34.36 | 3  | 1  | 17 | 98  | 0.856 | 0.630 | 1.109 | 0.830 | 277.36 | 34.36 | 29 | 98  | 652  | 70.5  | 7.90  |
| Q6P2L7   | Protein CASc4 OS=Mus musculus GN=Casc4 PE=1 SV=1 - [CASc4_MOUSE]                                                      | 29.66 | 5  | 10 | 10 | 31  | 1.313 | 1.115 | 0.866 | 0.831 | 94.65  | 29.66 | 17 | 31  | 435  | 49.4  | 5.45  |
| Q8CIR4   | Transient receptor potential cation channel subfamily M member 6 OS=Mus musculus GN=Trpm6 PE=2 SV=1 - [TRPM6_MOUSE]   | 0.99  | 1  | 1  | 2  | 2   | 0.839 | 1.017 | 0.781 | 0.831 | 5.55   | 0.99  | 2  | 2   | 2028 | 232.7 | 8.27  |
| Q91X96   | Guanine nucleotide exchange factor MSS4 OS=Mus musculus GN=Rabif PE=2 SV=1 -                                          | 13.01 | 1  | 3  | 3  | 8   | 2.292 | 0.928 | 1.074 | 0.831 | 22.20  | 13.01 | 4  | 8   | 123  | 13.9  | 5.52  |
| B1B1D8   | 39S ribosomal protein L2, mitochondrial OS=Mus musculus GN=Mrlp2 PE=2 SV=1 - [B1B1D8_MOUSE]                           | 21.71 | 2  | 3  | 4  | 11  | 1.141 | 0.632 | 0.830 | 0.831 | 38.48  | 21.71 | 8  | 11  | 304  | 33.1  | 11.06 |
| G3UWF7   | Polypeptide N-acetylgalactosaminyltransferase 15 OS=Mus musculus GN=Galnt15 PE=4 SV=1 - [GALNT15_MOUSE]               | 1.56  | 2  | 1  | 1  | 1   | 0.673 | 0.656 | 1.031 | 0.831 | 2.16   | 1.56  | 1  | 1   | 514  | 58.5  | 7.21  |
| Q5SKY1-3 | Isoform 4 of Cytosin-B OS=Mus musculus GN=Specc1 - [CYTSB_MOUSE]                                                      | 36.17 | 1  | 1  | 33 | 125 | 1.083 | 0.363 | 0.927 | 0.831 | 334.43 | 36.17 | 57 | 125 | 987  | 109.8 | 5.86  |

|           |                                                                                                      |       |    |    |    |     |       |       |       |       |        |       |    |     |      |       |       |
|-----------|------------------------------------------------------------------------------------------------------|-------|----|----|----|-----|-------|-------|-------|-------|--------|-------|----|-----|------|-------|-------|
| Q9CX6     | Interleukin enhancer-binding factor 2 OS=Mus musculus GN=Ilf2 PE=1 SV=1 - [ILF2_MOUSE]               | 38.97 | 1  | 13 | 13 | 49  | 0.702 | 1.002 | 0.777 | 0.831 | 124.76 | 38.97 | 25 | 49  | 390  | 43.0  | 5.26  |
| Q3U0V1    | Far upstream element-binding protein 2 OS=Mus musculus GN=Khsrp PE=1 SV=2 - [FUBP2_MOUSE]            | 52.01 | 1  | 28 | 35 | 268 | 1.090 | 0.886 | 1.129 | 0.831 | 761.98 | 52.01 | 62 | 268 | 748  | 76.7  | 7.33  |
| Q8BK67    | Protein RCC2 OS=Mus musculus GN=Rcc2 PE=2 SV=1 - [RCC2_MOUSE]                                        | 20.58 | 2  | 10 | 10 | 26  | 0.811 | 0.742 | 0.906 | 0.831 | 86.08  | 20.58 | 16 | 26  | 520  | 55.9  | 8.72  |
| Q5ZQ46    | Immunoglobulin superfamily member 3 OS=Mus musculus GN=Igsf3 PE=1 SV=2 - [IGSF3_MOUSE]               | 8.96  | 1  | 9  | 9  | 21  | 0.973 | 0.838 | 0.730 | 0.831 | 63.16  | 8.96  | 16 | 21  | 1194 | 134.6 | 6.05  |
| P62911    | 60S ribosomal protein L32 OS=Mus musculus GN=Rpl32 PE=2 SV=2 - [RL32_MOUSE]                          | 44.44 | 4  | 7  | 7  | 53  | 0.512 | 0.702 | 0.720 | 0.831 | 147.30 | 44.44 | 13 | 53  | 135  | 15.8  | 11.33 |
| O88974-3  | Isoform 3 of Histone-lysine N-methyltransferase SETDB1 OS=Mus musculus GN=Setdb1 - [SETB1_MOUSE]     | 5.00  | 5  | 3  | 3  | 6   | 0.949 | 0.653 | 0.914 | 0.831 | 8.33   | 5.00  | 4  | 6   | 500  | 54.4  | 5.11  |
| F2Z4B3    | Cyclin-dependent kinase 2-associated protein 1 OS=Mus musculus GN=Cdk2ap1 PE=2 SV=1 - [F2Z4B3_MOUSE] | 26.44 | 4  | 2  | 2  | 4   | 0.869 | 1.204 | 0.966 | 0.831 | 12.76  | 26.44 | 3  | 4   | 87   | 9.6   | 9.19  |
| Q9Z0H4-11 | Isoform 11 of CUGBP Elav-like family member 2 OS=Mus musculus GN=Celf2 - [CELF2_MOUSE]               | 24.14 | 13 | 9  | 11 | 50  | 0.719 | 1.763 | 1.472 | 0.831 | 128.59 | 24.14 | 19 | 50  | 464  | 49.2  | 9.09  |
| E9QK44    | Serine/arginine repetitive matrix protein 1 OS=Mus musculus GN=Srrm1 PE=2 SV=1 - [E9QK44_MOUSE]      | 7.58  | 9  | 3  | 7  | 19  | 0.744 | 0.794 | 0.759 | 0.831 | 38.20  | 7.58  | 12 | 19  | 897  | 101.1 | 11.94 |
| P01756    | Ig heavy chain V region MOPC 104E OS=Mus musculus PE=1 SV=1 - [HVM12_MOUSE]                          | 16.24 | 3  | 1  | 1  | 4   | 2.646 | 2.898 | 0.828 | 0.831 | 15.21  | 16.24 | 2  | 4   | 117  | 13.0  | 7.11  |
| Q8CIE6    | Coatomer subunit alpha OS=Mus musculus GN=Copa PE=1 SV=2 - [COPA_MOUSE]                              | 42.48 | 4  | 44 | 44 | 129 | 0.705 | 0.884 | 0.713 | 0.832 | 372.98 | 42.48 | 67 | 129 | 1224 | 138.3 | 7.65  |
| Q6DFZ1    | Golgi-specific brefeldin A-resistance factor 1 OS=Mus musculus GN=Gbf1 PE=1 SV=1 - [Q6DFZ1_MOUSE]    | 15.05 | 4  | 21 | 24 | 73  | 0.683 | 0.704 | 0.712 | 0.832 | 202.09 | 15.05 | 39 | 73  | 1861 | 206.7 | 5.80  |
| P29341    | Polyadenylate-binding protein 1 OS=Mus musculus GN=Pabpc1 PE=1 SV=2 -                                | 37.11 | 3  | 15 | 24 | 126 | 1.311 | 0.820 | 0.898 | 0.832 | 393.20 | 37.11 | 41 | 126 | 636  | 70.6  | 9.50  |
| Q9DBH5    | Vesicular integral-membrane protein VIP36 OS=Mus musculus GN=Lman2 PE=2 SV=2 - [LMAN2_MOUSE]         | 36.59 | 1  | 10 | 10 | 38  | 0.797 | 0.881 | 0.727 | 0.832 | 116.90 | 36.59 | 18 | 38  | 358  | 40.4  | 6.95  |
| D3Z069    | Pleckstrin homology-like domain family B member 2 (Fragment) OS=Mus musculus GN=Phldb2 PE=2 SV=1 -   | 1.95  | 4  | 2  | 2  | 3   | 1.430 | 1.205 | 1.290 | 0.832 | 7.30   | 1.95  | 3  | 3   | 1131 | 127.1 | 6.27  |
| Q9D1M0    | Protein SEC13 homolog OS=Mus musculus GN=Sec13 PE=2 SV=3 - [SEC13_MOUSE]                             | 23.91 | 1  | 6  | 6  | 40  | 1.315 | 1.003 | 0.802 | 0.832 | 112.72 | 23.91 | 11 | 40  | 322  | 35.5  | 5.38  |
| Q3THE2    | Myosin regulatory light chain 12B OS=Mus musculus GN=My112b PE=1 SV=2 -                              | 59.88 | 3  | 1  | 9  | 135 | 0.961 | 0.361 | 1.283 | 0.832 | 407.22 | 59.88 | 17 | 135 | 172  | 19.8  | 4.84  |
| Q80W85    | Nucleoplasmin-2 OS=Mus musculus GN=Npm2 PE=2 SV=1 - [NPM2_MOUSE]                                     | 7.25  | 1  | 1  | 1  | 2   | 1.190 | 1.032 | 1.207 | 0.832 | 2.83   | 7.25  | 1  | 2   | 207  | 23.3  | 5.10  |
| E9QMV2    | Protein Gm6314 OS=Mus musculus GN=Abrad PE=4 SV=1 - [E9QMV2_MOUSE]                                   | 40.74 | 2  | 2  | 2  | 7   | 2.648 | 0.923 | 0.771 | 0.832 | 19.21  | 40.74 | 4  | 7   | 81   | 9.1   | 5.80  |
| Q91WB2    | Probable lipid phosphate phosphatase PPAPDC3 OS=Mus musculus GN=Ppapdc3 PE=1 SV=1 - [PPAC3_MOUSE]    | 6.27  | 1  | 2  | 2  | 16  | 0.442 | 0.597 | 1.280 | 0.833 | 54.98  | 6.27  | 3  | 16  | 271  | 29.7  | 9.99  |
| E9QPI5    | Sister chromatid cohesion protein PDSS homolog A OS=Mus musculus GN=Pds5a PE=4 SV=1 - [E9QPI5_MOUSE] | 11.19 | 4  | 9  | 12 | 19  | 0.816 | 0.807 | 0.861 | 0.833 | 40.63  | 11.19 | 14 | 19  | 1332 | 150.1 | 7.85  |
| Q9Z1L5    | Voltage-dependent calcium channel subunit alpha-2/delta-3 OS=Mus musculus GN=Cacna2d3 PE=1 SV=1 -    | 20.62 | 1  | 18 | 18 | 58  | 0.558 | 0.778 | 1.102 | 0.833 | 160.20 | 20.62 | 31 | 58  | 1091 | 122.7 | 5.73  |
| F2Z4A3    | Protein Fat1 OS=Mus musculus GN=Fat1 PE=2 SV=1 - [F2Z4A3_MOUSE]                                      | 4.20  | 1  | 13 | 15 | 29  | 1.259 | 0.994 | 1.067 | 0.833 | 62.60  | 4.20  | 24 | 29  | 4590 | 506.0 | 5.00  |
| E9PVG7    | Mitogen-activated protein kinase kinase kinase 4 OS=Mus musculus GN=Map4k4 PE=4 SV=2 -               | 20.42 | 3  | 1  | 24 | 66  | 1.044 | 0.794 | 0.991 | 0.833 | 177.33 | 20.42 | 37 | 66  | 1288 | 146.6 | 7.58  |

|          |                                                                                                                      |       |   |    |    |     |       |       |       |       |         |       |     |     |      |       |       |
|----------|----------------------------------------------------------------------------------------------------------------------|-------|---|----|----|-----|-------|-------|-------|-------|---------|-------|-----|-----|------|-------|-------|
| Q8K2D6   | Deoxycytidylate deaminase<br>OS=Mus musculus<br>GN=Dctd PE=2 SV=1 -<br>[DCTD_MOUSE]                                  | 3.93  | 2 | 1  | 1  | 4   | 1.222 | 1.020 | 1.329 | 0.833 | 4.54    | 3.93  | 1   | 4   | 178  | 20.0  | 7.91  |
| Q8BY02   | NF-kappa-B-repressing<br>factor OS=Mus musculus<br>GN=Nkrf PE=2 SV=3 -<br>[NKRf_MOUSE]                               | 19.57 | 1 | 12 | 13 | 29  | 1.780 | 0.717 | 0.919 | 0.833 | 68.03   | 19.57 | 19  | 29  | 690  | 77.7  | 8.97  |
| E9PWK7   | Ephrin type-B receptor 4<br>OS=Mus musculus<br>GN=Ephb4 PE=2 SV=1 -<br>[E9PWK7_MOUSE]                                | 9.52  | 5 | 3  | 6  | 10  | 1.612 | 1.277 | 0.645 | 0.833 | 25.16   | 9.52  | 7   | 10  | 935  | 103.1 | 7.08  |
| Q80TE7   | Leucine-rich repeat-<br>containing protein 7<br>OS=Mus musculus<br>GN=Lrrc7 PE=1 SV=2 -<br>[LRRc7_MOUSE]             | 42.75 | 8 | 47 | 53 | 170 | 0.843 | 1.544 | 1.494 | 0.833 | 471.87  | 42.75 | 80  | 170 | 1490 | 166.8 | 6.61  |
| Q2MKAS-2 | Isoform 2 of Neuronal<br>acetylcholine receptor<br>subunit alpha-5 OS=Mus<br>musculus GN=Chra5 -<br>[ACHAS_MOUSE]    | 3.20  | 2 | 1  | 1  | 1   | 1.754 | 0.710 | 0.840 | 0.834 | 0.00    | 3.20  | 1   | 1   | 438  | 50.3  | 6.01  |
| Q8VDD5   | Myosin-9 OS=Mus<br>musculus GN=Myh9 PE=1<br>SV=4 - [MYH9_MOUSE]                                                      | 47.91 | 2 | 68 | 95 | 521 | 1.366 | 1.043 | 1.122 | 0.834 | 1526.05 | 47.91 | 167 | 521 | 1960 | 226.2 | 5.66  |
| A4FUP9   | Glycosyltransferase 1<br>domain-containing protein<br>1 OS=Mus musculus<br>GN=Gltd1 PE=2 SV=2 -<br>[GLTD1_MOUSE]     | 10.98 | 1 | 2  | 2  | 4   | 1.367 | 0.805 | 1.137 | 0.834 | 7.41    | 10.98 | 3   | 4   | 346  | 38.8  | 5.66  |
| O55234   | Proteasome subunit beta<br>type-5 OS=Mus musculus<br>GN=Psb5 PE=1 SV=3 -<br>[PSB5_MOUSE]                             | 53.79 | 1 | 15 | 15 | 93  | 1.923 | 0.846 | 0.760 | 0.834 | 300.21  | 53.79 | 28  | 93  | 264  | 28.5  | 7.02  |
| D3Z4U0   | Zinc finger Ran-binding<br>domain-containing protein<br>2 OS=Mus musculus<br>GN=Zranb2 PE=2 SV=1 -<br>[D3Z4U0_MOUSE] | 23.03 | 5 | 7  | 7  | 25  | 0.846 | 0.741 | 0.958 | 0.834 | 56.77   | 23.03 | 12  | 25  | 330  | 37.3  | 9.63  |
| Q9CQM9   | Glutaredoxin-3 OS=Mus<br>musculus GN=Glx3 PE=1<br>SV=1 - [GLRX3_MOUSE]                                               | 55.79 | 1 | 15 | 15 | 84  | 1.764 | 0.799 | 0.873 | 0.834 | 258.76  | 55.79 | 28  | 84  | 337  | 37.8  | 5.59  |
| P67984   | 60S ribosomal protein L22<br>OS=Mus musculus<br>GN=Rpl22 PE=2 SV=2 -<br>[RL22_MOUSE]                                 | 43.75 | 1 | 4  | 4  | 12  | 1.119 | 0.796 | 0.924 | 0.834 | 29.35   | 43.75 | 6   | 12  | 128  | 14.7  | 9.19  |
| Q91Y00   | Very low-density<br>lipoprotein receptor<br>OS=Mus musculus<br>GN=Vldlr PE=2 SV=1 -<br>[Q91Y00_MOUSE]                | 23.91 | 5 | 15 | 15 | 39  | 0.764 | 1.316 | 0.979 | 0.834 | 98.12   | 23.91 | 23  | 39  | 845  | 93.5  | 4.79  |
| P62264   | 40S ribosomal protein S14<br>OS=Mus musculus<br>GN=Rps14 PE=2 SV=3 -<br>[RS14_MOUSE]                                 | 41.72 | 3 | 7  | 7  | 61  | 0.662 | 0.562 | 0.841 | 0.834 | 187.17  | 41.72 | 13  | 61  | 151  | 16.3  | 10.05 |
| Q8VDT9   | 39S ribosomal protein L50,<br>mitochondrial OS=Mus<br>musculus GN=Mrip50<br>PE=2 SV=2 -<br>[RM50_MOUSE]              | 60.38 | 1 | 8  | 8  | 26  | 1.252 | 0.976 | 0.981 | 0.834 | 77.98   | 60.38 | 13  | 26  | 159  | 18.2  | 9.33  |
| Q61048   | WW domain-binding<br>protein 4 OS=Mus<br>musculus GN=Wbp4 PE=1<br>SV=4 - [WBP4_MOUSE]                                | 2.93  | 1 | 1  | 1  | 5   | 0.957 | 0.514 | 1.074 | 0.834 | 10.95   | 2.93  | 2   | 5   | 376  | 42.1  | 7.36  |
| Q6ZWZ7   | 60S ribosomal protein L17<br>OS=Mus musculus<br>GN=Rpl17 PE=2 SV=1 -<br>[Q6ZWZ7_MOUSE]                               | 38.59 | 2 | 4  | 7  | 37  | 0.602 | 0.811 | 0.703 | 0.834 | 100.87  | 38.59 | 12  | 37  | 184  | 21.4  | 10.18 |
| Q9DCT8   | Cysteine-rich protein 2<br>OS=Mus musculus<br>GN=Crip2 PE=1 SV=1 -<br>[CRIP2_MOUSE]                                  | 46.15 | 1 | 7  | 8  | 83  | 1.156 | 1.255 | 1.257 | 0.835 | 258.79  | 46.15 | 13  | 83  | 208  | 22.7  | 8.63  |
| F6T9K1   | Dr1-associated corepressor<br>OS=Mus musculus<br>GN=Drp1 PE=2 SV=2 -<br>[F6T9K1_MOUSE]                               | 20.33 | 5 | 4  | 4  | 9   | 0.709 | 0.671 | 0.814 | 0.835 | 21.26   | 20.33 | 6   | 9   | 182  | 20.0  | 8.25  |
| Q61809   | Leucine-rich repeat<br>neuronal protein 1<br>OS=Mus musculus<br>GN=Lrn1 PE=2 SV=1 -<br>[LRRN1_MOUSE]                 | 17.46 | 1 | 11 | 12 | 24  | 0.849 | 0.705 | 0.862 | 0.835 | 72.97   | 17.46 | 20  | 24  | 716  | 80.5  | 6.15  |
| Q68FD9   | UPF0606 protein<br>KIAA1549 OS=Mus<br>musculus GN=Kiaa1549<br>PE=1 SV=3 -                                            | 15.46 | 3 | 20 | 20 | 46  | 0.688 | 1.118 | 1.216 | 0.835 | 149.31  | 15.46 | 31  | 46  | 1940 | 209.1 | 6.10  |
| Q08879-2 | Isoform C of Fibulin-1<br>OS=Mus musculus<br>GN=Fbln1 -<br>[FBLN1_MOUSE]                                             | 7.30  | 2 | 5  | 5  | 7   | 1.305 | 1.279 | 0.672 | 0.835 | 16.72   | 7.30  | 7   | 7   | 685  | 75.2  | 5.27  |
| Q9QZ82   | Cholesterol side-chain<br>cleavage enzyme,<br>mitochondrial OS=Mus<br>musculus GN=Cyp11a1<br>PE=2 SV=1 -             | 3.99  | 1 | 2  | 2  | 2   | 3.119 | 1.655 | 1.057 | 0.835 | 6.21    | 3.99  | 2   | 2   | 526  | 60.3  | 9.39  |
| H3BL26   | Tetraspanin-6 (Fragment)<br>OS=Mus musculus<br>GN=Tspan6 PE=2 SV=1 -<br>[H3BL26_MOUSE]                               | 16.77 | 4 | 3  | 3  | 9   | 0.549 | 0.882 | 0.548 | 0.835 | 18.22   | 16.77 | 4   | 9   | 167  | 18.7  | 7.61  |
| Q920A7   | AFG3-like protein 1<br>OS=Mus musculus<br>GN=Afg3l1 PE=2 SV=2 -<br>[AFG31_MOUSE]                                     | 16.48 | 2 | 7  | 12 | 32  | 0.818 | 0.708 | 0.845 | 0.835 | 74.88   | 16.48 | 19  | 32  | 789  | 87.0  | 8.85  |
| Q61189   | Methylosome subunit<br>p1Cin OS=Mus musculus<br>GN=Cins1a PE=1 SV=1 -<br>[ICLN_MOUSE]                                | 41.95 | 2 | 6  | 6  | 43  | 1.639 | 1.089 | 1.026 | 0.835 | 128.85  | 41.95 | 11  | 43  | 236  | 26.0  | 4.12  |

|          |                                                                                                                                    |       |    |    |    |     |       |       |       |       |         |       |     |     |      |       |       |
|----------|------------------------------------------------------------------------------------------------------------------------------------|-------|----|----|----|-----|-------|-------|-------|-------|---------|-------|-----|-----|------|-------|-------|
| Q9DBD5   | Proline-, glutamic acid- and leucine-rich protein 1<br>OS=Mus musculus<br>GN=Pelp1 PE=1 SV=2 - [PELP1_MOUSE]                       | 5.34  | 1  | 4  | 4  | 8   | 0.727 | 1.037 | 0.628 | 0.835 | 22.81   | 5.34  | 6   | 8   | 1123 | 118.0 | 4.36  |
| Q8CFZ0   | SUMO-conjugating enzyme UBC9 OS=Mus musculus<br>GN=Ubc2 PE=4 SV=1 - [Q8CFZ0_MOUSE]                                                 | 36.63 | 3  | 5  | 5  | 19  | 0.737 | 0.972 | 0.812 | 0.836 | 65.63   | 36.63 | 9   | 19  | 101  | 11.2  | 8.84  |
| Q8C341   | SUN domain-containing ossification factor OS=Mus musculus<br>GN=Suco PE=1 SV=3 - [SUCCO_MOUSE]                                     | 6.00  | 3  | 5  | 6  | 10  | 1.065 | 1.011 | 1.002 | 0.836 | 20.90   | 6.00  | 7   | 10  | 1250 | 139.1 | 5.02  |
| Q8BP01   | Vimentin-type intermediate filament-associated coiled-coil protein OS=Mus musculus<br>GN=Vmac PE=2 SV=1 - [VIMAC_MOUSE]            | 13.79 | 1  | 2  | 3  | 9   | 1.429 | 1.167 | 0.838 | 0.836 | 22.53   | 13.79 | 5   | 9   | 174  | 19.0  | 5.39  |
| Q8BH43   | Wiskott-Aldrich syndrome protein family member 2 OS=Mus musculus<br>GN=Wasf2 PE=1 SV=1 - [WASF2_MOUSE]                             | 23.34 | 2  | 11 | 12 | 30  | 1.194 | 0.932 | 0.963 | 0.836 | 83.53   | 23.34 | 21  | 30  | 497  | 54.0  | 5.53  |
| Q8C129   | Leucyl-cystinyl aminopeptidase OS=Mus musculus<br>GN=Lnep PE=1 SV=1 - [LCAP_MOUSE]                                                 | 17.46 | 1  | 16 | 16 | 40  | 0.615 | 1.140 | 0.626 | 0.836 | 131.24  | 17.46 | 28  | 40  | 1025 | 117.2 | 5.96  |
| Q9DBR4-2 | Isoform 2 of Amyloid beta A4 precursor protein-binding family B member 2 OS=Mus musculus<br>GN=Apbb2 - [APBB2_MOUSE]               | 8.66  | 11 | 5  | 6  | 15  | 1.732 | 0.694 | 1.616 | 0.836 | 40.33   | 8.66  | 10  | 15  | 739  | 80.8  | 6.05  |
| E9PWC0   | Microtubule-associated protein OS=Mus musculus<br>GN=Map4 PE=2 SV=1 - [E9PWC0_MOUSE]                                               | 71.62 | 2  | 30 | 60 | 401 | 1.269 | 0.635 | 1.163 | 0.836 | 1055.17 | 71.62 | 110 | 401 | 902  | 94.5  | 8.97  |
| Q920P5   | Adenylate kinase isoenzyme 5 OS=Mus musculus<br>GN=Ak5 PE=2 SV=2 - [KAD5_MOUSE]                                                    | 35.94 | 2  | 17 | 18 | 82  | 0.827 | 2.701 | 1.332 | 0.836 | 218.08  | 35.94 | 31  | 82  | 562  | 63.3  | 5.29  |
| A6H690   | IQ and AAA domain-containing protein 1-like OS=Mus musculus<br>GN=Iqca1p1 PE=2 SV=3 - [IQCAL_MOUSE]                                | 4.36  | 4  | 2  | 3  | 9   | 0.426 | 1.286 | 1.638 | 0.836 | 14.96   | 4.36  | 4   | 9   | 825  | 95.9  | 9.51  |
| O55060   | Thiopurine S-methyltransferase OS=Mus musculus<br>GN=Tpm1 PE=1 SV=1 - [TPMT_MOUSE]                                                 | 20.42 | 4  | 4  | 4  | 10  | 1.379 | 1.073 | 0.784 | 0.836 | 30.40   | 20.42 | 6   | 10  | 240  | 27.6  | 6.44  |
| Q6PCM2-2 | Isoform 2 of Integrator complex subunit 6 OS=Mus musculus<br>GN=Ints6 - [INTS6_MOUSE]                                              | 8.92  | 5  | 6  | 6  | 12  | 0.518 | 1.019 | 0.807 | 0.836 | 26.81   | 8.92  | 10  | 12  | 874  | 98.6  | 8.66  |
| Q9R0M8   | UDP-galactose translocator OS=Mus musculus<br>GN=Slc35a2 PE=2 SV=1 - [S35A2_MOUSE]                                                 | 13.59 | 2  | 3  | 3  | 16  | 0.966 | 0.664 | 0.682 | 0.836 | 44.94   | 13.59 | 5   | 16  | 390  | 40.7  | 9.86  |
| E9Q3B5   | Uncharacterized protein OS=Mus musculus<br>GN=Gm10774 PE=3 SV=1 - [E9Q3B5_MOUSE]                                                   | 29.85 | 2  | 2  | 2  | 6   | 0.972 | 1.111 | 0.885 | 0.836 | 20.31   | 29.85 | 4   | 6   | 67   | 7.6   | 8.48  |
| E9QKH8   | Catenin delta-2 OS=Mus musculus<br>GN=Ctnd2 PE=2 SV=1 - [E9QKH8_MOUSE]                                                             | 49.60 | 1  | 1  | 49 | 455 | 0.898 | 0.548 | 1.302 | 0.837 | 1407.33 | 49.60 | 85  | 455 | 1246 | 134.9 | 7.65  |
| Q8CGF7-2 | Isoform 2 of Transcription elongation regulator 1 OS=Mus musculus<br>GN=Tcrg1 [TCRGI_MOUSE]                                        | 17.24 | 3  | 21 | 22 | 60  | 1.014 | 0.633 | 1.042 | 0.837 | 155.47  | 17.24 | 33  | 60  | 1079 | 121.5 | 8.54  |
| F7CDW2   | Serine-rich coiled-coil domain-containing protein 1 (Fragment) OS=Mus musculus<br>GN=Ccser1 PE=4 SV=1 - [CCSER1_MOUSE]             | 14.88 | 3  | 2  | 2  | 3   | 2.047 | 1.186 | 1.043 | 0.837 | 8.83    | 14.88 | 2   | 3   | 168  | 18.7  | 5.21  |
| Q80ZM5   | H1 histone family, member X OS=Mus musculus<br>GN=H1fx PE=2 SV=1 - [Q80ZM5_MOUSE]                                                  | 21.81 | 1  | 4  | 4  | 15  | 0.519 | 1.036 | 0.904 | 0.837 | 36.01   | 21.81 | 8   | 15  | 188  | 20.1  | 11.22 |
| O55201-2 | Isoform 2 of Transcription elongation factor SPT5 OS=Mus musculus<br>GN=Supt5h [SPT5H_MOUSE]                                       | 28.49 | 2  | 22 | 22 | 80  | 0.954 | 0.987 | 0.978 | 0.837 | 213.67  | 28.49 | 39  | 80  | 888  | 98.2  | 7.15  |
| D3YTQ3   | Heterogeneous nuclear ribonucleoprotein D-like OS=Mus musculus<br>GN=Hnrpd PE=2 SV=1 - [D3YTQ3_MOUSE]                              | 35.00 | 5  | 12 | 15 | 88  | 1.207 | 0.790 | 1.404 | 0.837 | 269.21  | 35.00 | 25  | 88  | 420  | 46.2  | 9.57  |
| O89079   | Coatamer subunit epsilon OS=Mus musculus<br>GN=Cope PE=2 SV=3 - [COPE_MOUSE]                                                       | 39.94 | 5  | 10 | 11 | 27  | 1.135 | 0.884 | 0.797 | 0.837 | 81.83   | 39.94 | 19  | 27  | 308  | 34.5  | 5.06  |
| D3Z667   | Dynein heavy chain 2, axonemal OS=Mus musculus<br>GN=Dnah2 PE=2 SV=1 - [DNAH2_MOUSE]                                               | 2.58  | 2  | 8  | 9  | 19  | 1.835 | 1.201 | 1.432 | 0.837 | 23.02   | 2.58  | 10  | 19  | 4462 | 512.0 | 6.47  |
| Q9QUR7   | Peptidyl-prolyl cis-trans isomerase NIMA-interacting 1 OS=Mus musculus<br>GN=Pin1 PE=1 SV=1 - [PIN1_MOUSE]                         | 55.15 | 1  | 8  | 8  | 82  | 1.745 | 1.046 | 1.193 | 0.837 | 276.20  | 55.15 | 13  | 82  | 165  | 18.4  | 8.79  |
| Q3TDQ1   | Dolichyl-diphosphooligosaccharide--protein glycosyltransferase subunit STT3B OS=Mus musculus<br>GN=Stt3b PE=1 SV=2 - [STT3B_MOUSE] | 11.54 | 1  | 8  | 10 | 36  | 0.579 | 0.733 | 0.725 | 0.837 | 90.24   | 11.54 | 20  | 36  | 823  | 93.2  | 8.95  |

|          |                                                                                                           |       |   |    |    |     |       |       |       |       |        |       |     |     |      |       |      |
|----------|-----------------------------------------------------------------------------------------------------------|-------|---|----|----|-----|-------|-------|-------|-------|--------|-------|-----|-----|------|-------|------|
| Q9CQ06   | 39S ribosomal protein L24, mitochondrial OS=Mus musculus GN=MpL24 PE=2 SV=1 - [RM24_MOUSE]                | 28.70 | 1 | 6  | 6  | 16  | 1.205 | 0.561 | 0.847 | 0.837 | 37.17  | 28.70 | 9   | 16  | 216  | 24.9  | 9.50 |
| P63037   | DnaJ homolog subfamily A member 1 OS=Mus musculus GN=Dnaja1 PE=1 SV=1 -                                   | 48.36 | 5 | 14 | 17 | 95  | 0.861 | 0.654 | 0.828 | 0.837 | 281.40 | 48.36 | 31  | 95  | 397  | 44.8  | 7.08 |
| Q0VBV7   | Uncharacterized protein KIAA1377 OS=Mus musculus GN=Kiaa1377 PE=2 SV=1 -                                  | 0.54  | 1 | 1  | 1  | 2   | 1.861 | 1.269 | 1.420 | 0.837 | 6.02   | 0.54  | 1   | 2   | 1103 | 123.6 | 9.07 |
| E9QQ10   | A-kinase anchor protein 9 OS=Mus musculus GN=Akap9 PE=2 SV=1 - [E9QQ10_MOUSE]                             | 18.95 | 5 | 63 | 66 | 159 | 1.227 | 1.089 | 1.088 | 0.838 | 419.82 | 18.95 | 105 | 159 | 3779 | 433.9 | 5.03 |
| P63271   | Transcription elongation factor SPT4-A OS=Mus musculus GN=SupM4h1a PE=2 SV=1 - [SPT4A_MOUSE]              | 19.66 | 2 | 1  | 2  | 6   | 0.694 | 0.843 | 0.873 | 0.838 | 17.49  | 19.66 | 3   | 6   | 117  | 13.2  | 8.06 |
| Q8BF2-2  | Isoform 2 of RNA binding protein fox-1 homolog 3 OS=Mus musculus GN=Rbfox3 -                              | 35.00 | 7 | 5  | 10 | 35  | 1.096 | 0.946 | 1.361 | 0.838 | 124.78 | 35.00 | 17  | 35  | 360  | 39.0  | 7.23 |
| Q8BUL6   | Pleckstrin homology domain-containing family A member 1 OS=Mus musculus GN=Plekha1 PE=1 SV=1 -            | 28.46 | 5 | 11 | 11 | 19  | 0.932 | 0.631 | 0.840 | 0.838 | 35.99  | 28.46 | 15  | 19  | 383  | 43.3  | 9.22 |
| Q9D365   | Signal peptidase complex subunit 3 OS=Mus musculus GN=Sp3c3 PE=2 SV=1 - [SP3C3_MOUSE]                     | 21.67 | 1 | 4  | 4  | 8   | 0.583 | 0.851 | 0.622 | 0.838 | 21.57  | 21.67 | 5   | 8   | 180  | 20.1  | 9.60 |
| P08556   | GTPase NRas OS=Mus musculus GN=Nras PE=2 SV=1 - [RAS_MOUSE]                                               | 61.90 | 5 | 2  | 9  | 90  | 0.658 | 0.901 | 0.856 | 0.838 | 204.56 | 61.90 | 15  | 90  | 189  | 21.2  | 5.17 |
| H3BL28   | Protein Ppp1r9a (Fragment) OS=Mus musculus GN=Ppp1r9a PE=2 SV=1 -                                         | 27.54 | 9 | 23 | 26 | 123 | 1.031 | 1.094 | 2.095 | 0.838 | 324.04 | 27.54 | 45  | 123 | 1042 | 116.4 | 4.96 |
| Q8BSK8-2 | Isoform Alpha II of Ribosomal protein S6 kinase beta-1 OS=Mus musculus GN=Rps6kb1 - [KS6B1_MOUSE]         | 12.95 | 4 | 5  | 7  | 16  | 0.856 | 0.992 | 0.895 | 0.838 | 46.65  | 12.95 | 12  | 16  | 502  | 56.1  | 6.44 |
| F8WI56   | Disco-interacting protein 2 homolog A OS=Mus musculus GN=Dip2a PE=2 SV=1 - [F8WI56_MOUSE]                 | 22.86 | 3 | 2  | 29 | 71  | 0.910 | 0.607 | 1.148 | 0.838 | 191.30 | 22.86 | 48  | 71  | 1562 | 169.4 | 7.77 |
| Q8VB70   | Thioredoxin-related transmembrane protein 1 OS=Mus musculus GN=Tmx1 PE=1 SV=1 - [TMX1_MOUSE]              | 20.50 | 2 | 7  | 7  | 32  | 0.576 | 0.786 | 0.627 | 0.838 | 77.89  | 20.50 | 12  | 32  | 278  | 31.4  | 5.29 |
| B8JK56   | Adenylate cyclase type 3 OS=Mus musculus GN=Adcy3 PE=3 SV=1 - [B8JK56_MOUSE]                              | 14.86 | 2 | 15 | 15 | 36  | 0.634 | 0.734 | 0.804 | 0.838 | 101.72 | 14.86 | 25  | 36  | 1144 | 128.9 | 6.29 |
| P23116   | Eukaryotic translation initiation factor 3 subunit A OS=Mus musculus GN=EIF3a PE=1 SV=5 - [EIF3A_MOUSE]   | 29.02 | 1 | 40 | 40 | 176 | 0.780 | 0.727 | 0.940 | 0.838 | 451.53 | 29.02 | 70  | 176 | 1344 | 161.8 | 6.77 |
| P01027   | Complement C3 OS=Mus musculus GN=C3 PE=1 SV=3 - [CO3_MOUSE]                                               | 45.46 | 4 | 68 | 68 | 255 | 2.293 | 1.342 | 0.516 | 0.838 | 733.34 | 45.46 | 114 | 255 | 1663 | 186.4 | 6.73 |
| D3Z742   | MCG125361, isoform CRA_a OS=Mus musculus GN=Mb21d2 PE=4 SV=1 - [D3Z742_MOUSE]                             | 17.92 | 2 | 8  | 8  | 18  | 0.767 | 0.886 | 0.812 | 0.838 | 45.87  | 17.92 | 12  | 18  | 491  | 55.6  | 7.50 |
| Q8BFX3   | BTB/POZ domain-containing protein KCTD3 OS=Mus musculus GN=Kctd3 PE=2 SV=1 - [KCTD3_MOUSE]                | 8.59  | 2 | 6  | 6  | 11  | 1.256 | 0.834 | 0.651 | 0.838 | 29.68  | 8.59  | 10  | 11  | 815  | 88.8  | 7.15 |
| P35377-4 | Isoform KOR3C of Nociceptin receptor OS=Mus musculus GN=Oprl1 -                                           | 11.58 | 1 | 1  | 1  | 1   | 1.142 | 1.324 | 0.857 | 0.838 | 0.00   | 11.58 | 1   | 1   | 95   | 10.3  | 7.94 |
| P12265   | Beta-glucuronidase OS=Mus musculus GN=Gusb PE=2 SV=2 - [BGLR_MOUSE]                                       | 12.50 | 2 | 7  | 7  | 20  | 2.100 | 0.774 | 0.754 | 0.838 | 66.68  | 12.50 | 13  | 20  | 648  | 74.1  | 6.70 |
| P59017   | Bcl-2-like protein 13 OS=Mus musculus GN=Bcl2l13 PE=1 SV=2 - [B2L13_MOUSE]                                | 19.35 | 1 | 5  | 6  | 16  | 0.520 | 0.897 | 0.897 | 0.838 | 31.19  | 19.35 | 10  | 16  | 434  | 46.7  | 4.59 |
| Q8CB96-2 | Isoform 2 of Ras association domain-containing protein 4 OS=Mus musculus GN=Rassf4 -                      | 15.51 | 3 | 1  | 4  | 8   | 1.707 | 1.329 | 0.756 | 0.838 | 16.88  | 15.51 | 5   | 8   | 303  | 34.6  | 6.54 |
| F6UPY1   | PAP-associated domain-containing protein 5 (Fragment) OS=Mus musculus GN=Papd5 PE=2 SV=1 - [F6UPY1_MOUSE] | 16.00 | 4 | 2  | 2  | 5   | 2.151 | 0.916 | 1.345 | 0.839 | 16.80  | 16.00 | 3   | 5   | 200  | 21.9  | 9.63 |
| Q5NCL4   | SPARC OS=Mus musculus GN=Sparc PE=2 SV=1 - [Q5NCL4_MOUSE]                                                 | 27.91 | 3 | 8  | 8  | 51  | 1.501 | 0.526 | 0.621 | 0.839 | 144.99 | 27.91 | 15  | 51  | 301  | 34.3  | 4.86 |
| Q9WTK2-2 | Isoform 2 of Chromodomain Y-like protein OS=Mus musculus GN=Cdy1 - [CDYL_MOUSE]                           | 4.60  | 2 | 2  | 2  | 3   | 1.927 | 0.778 | 0.857 | 0.839 | 8.28   | 4.60  | 3   | 3   | 544  | 60.1  | 9.10 |

|          |                                                                                                                                                  |       |    |    |    |     |        |       |       |       |        |       |     |     |      |       |       |
|----------|--------------------------------------------------------------------------------------------------------------------------------------------------|-------|----|----|----|-----|--------|-------|-------|-------|--------|-------|-----|-----|------|-------|-------|
| E9Q6C7   | Latrophilin-2 OS=Mus musculus GN=Lphn2 PE=2 SV=1 - [E9Q6C7_MOUSE]                                                                                | 14.93 | 4  | 16 | 18 | 68  | 0.967  | 0.949 | 0.987 | 0.839 | 181.90 | 14.93 | 30  | 68  | 1487 | 166.5 | 6.71  |
| Q03146   | Epithelial discoidin domain-containing receptor 1 OS=Mus musculus GN=Ddr1 PE=2 SV=2 - [DDR1_MOUSE]                                               | 8.01  | 8  | 5  | 5  | 13  | 1.282  | 0.690 | 0.893 | 0.839 | 34.38  | 8.01  | 10  | 13  | 911  | 101.1 | 6.58  |
| D3Z3S1   | Prolactin regulatory element binding, isoform CRA_b OS=Mus musculus GN=Preb PE=4 SV=1 - [D3Z3S1_MOUSE]                                           | 45.43 | 3  | 12 | 12 | 33  | 0.868  | 0.800 | 0.834 | 0.839 | 85.75  | 45.43 | 20  | 33  | 350  | 37.9  | 8.56  |
| Q91YQ5   | Dolichyl-diphosphooligosaccharide--protein glycosyltransferase subunit 1 OS=Mus musculus GN=Rpn1 PE=2 SV=1 - [RPN1_MOUSE]                        | 46.22 | 1  | 25 | 25 | 141 | 0.754  | 0.937 | 0.711 | 0.839 | 437.45 | 46.22 | 42  | 141 | 608  | 68.5  | 6.46  |
| Q569Z6   | Thyroid hormone receptor-associated protein 3 OS=Mus musculus GN=Thrap3 PE=1 SV=1 - [TR150_MOUSE]                                                | 15.46 | 5  | 15 | 15 | 52  | 0.678  | 0.732 | 0.922 | 0.839 | 151.65 | 15.46 | 25  | 52  | 951  | 108.1 | 10.17 |
| Q6A068   | Cell division cycle 5-like protein OS=Mus musculus GN=Cdc5l PE=1 SV=2 - [CDC5L_MOUSE]                                                            | 34.16 | 1  | 22 | 22 | 72  | 1.056  | 0.888 | 0.997 | 0.839 | 183.67 | 34.16 | 36  | 72  | 802  | 92.1  | 8.02  |
| Q6JHY2-3 | Isoform 4 of Submandibular gland protein C OS=Mus musculus GN=Muc19 - Fatty acid desaturase 2 OS=Mus musculus GN=Fads2 PE=2 SV=1 - [FADS2_MOUSE] | 10.26 | 1  | 1  | 1  | 1   | 1.100  | 0.824 | 1.440 | 0.839 | 2.69   | 10.26 | 1   | 1   | 341  | 34.1  | 9.09  |
| Q9Z0R9   | Protein Tfg OS=Mus musculus GN=Tfg PE=2 SV=1 - [Q9Z1A1_MOUSE]                                                                                    | 22.75 | 1  | 9  | 9  | 23  | 0.913  | 0.755 | 0.530 | 0.839 | 62.52  | 22.75 | 18  | 23  | 444  | 52.4  | 8.82  |
| Q9Z1A1   | Threonine--tRNA ligase, cytoplasmic OS=Mus musculus GN=Tars PE=1 SV=2 - [SYTC_MOUSE]                                                             | 41.81 | 7  | 13 | 13 | 85  | 1.670  | 0.852 | 0.937 | 0.839 | 280.34 | 41.81 | 23  | 85  | 397  | 43.0  | 5.10  |
| Q9D0R2   | Nuclear ubiquitously and cyclin-dependent kinase substrate 1 OS=Mus musculus GN=Ncks1 PE=1 SV=1 - [NCKS1_MOUSE]                                  | 43.21 | 1  | 25 | 29 | 92  | 0.924  | 0.918 | 0.844 | 0.839 | 281.67 | 43.21 | 51  | 92  | 722  | 83.3  | 7.36  |
| Q80XU3   | Intersectin-1 OS=Mus musculus GN=Itsn1 PE=2 SV=1 - [E9Q0N0_MOUSE]                                                                                | 7.26  | 1  | 2  | 2  | 11  | 0.625  | 0.754 | 1.122 | 0.839 | 27.61  | 7.26  | 4   | 11  | 234  | 26.3  | 5.14  |
| E9Q0N0   | Phenylalanine--tRNA ligase beta subunit OS=Mus musculus GN=Farsb PE=2 SV=2 - [SYFB_MOUSE]                                                        | 38.86 | 13 | 2  | 63 | 237 | 5.230  | 2.149 | 0.993 | 0.839 | 693.78 | 38.86 | 108 | 237 | 1719 | 194.8 | 7.91  |
| Q9WUA2   | Mesoderm development candidate 1 OS=Mus musculus GN=Mescd1 PE=1 SV=1 - [DHR13_MOUSE]                                                             | 48.56 | 1  | 29 | 29 | 122 | 0.652  | 0.849 | 0.738 | 0.839 | 363.71 | 48.56 | 50  | 122 | 589  | 65.7  | 7.12  |
| Q9ERE8   | Dehydrogenase/reductase SDR family member 13 OS=Mus musculus GN=Dhrs13 PE=1 SV=1 - [YAP1_MOUSE]                                                  | 8.84  | 1  | 2  | 2  | 8   | 3.491  | 1.254 | 0.821 | 0.840 | 24.47  | 8.84  | 4   | 8   | 362  | 37.8  | 8.15  |
| Q5SS80   | Isoform 2 of Yorkie homolog OS=Mus musculus GN=Yap1 - [YAP1_MOUSE]                                                                               | 16.22 | 4  | 5  | 5  | 18  | 0.780  | 0.481 | 0.749 | 0.840 | 62.63  | 16.22 | 10  | 18  | 376  | 40.7  | 7.93  |
| P46938-2 | Pre-mRNA branch site protein p14 OS=Mus musculus GN=Sf3b14 PE=2 SV=1 - [CAB45_MOUSE]                                                             | 39.41 | 6  | 9  | 9  | 25  | 2.034  | 1.499 | 1.171 | 0.840 | 76.92  | 39.41 | 14  | 25  | 472  | 50.7  | 5.00  |
| P59708   | Contactin-associated protein like 5-1 OS=Mus musculus GN=Ctnnap5a PE=2 SV=1 - [SBDS_MOUSE]                                                       | 39.20 | 1  | 4  | 4  | 13  | 0.641  | 0.926 | 0.937 | 0.840 | 44.79  | 39.20 | 7   | 13  | 125  | 14.6  | 9.38  |
| Q0V8T9   | 45 kDa calcium-binding protein OS=Mus musculus GN=Sdh4 PE=2 SV=1 - [CAB45_MOUSE]                                                                 | 10.43 | 2  | 8  | 11 | 40  | 1.066  | 1.353 | 0.940 | 0.840 | 113.80 | 10.43 | 21  | 40  | 1304 | 145.6 | 6.28  |
| Q61112   | Ribosome maturation protein SBDS OS=Mus musculus GN=SBds PE=1 SV=4 - [SBDS_MOUSE]                                                                | 27.98 | 2  | 10 | 10 | 34  | 1.251  | 0.707 | 0.926 | 0.840 | 86.26  | 27.98 | 18  | 34  | 361  | 42.0  | 4.96  |
| P70122   | 5-hydroxytryptamine receptor 1A OS=Mus musculus GN=Htr1a PE=2 SV=2 - [5HT1A_MOUSE]                                                               | 45.60 | 3  | 12 | 12 | 35  | 1.061  | 0.790 | 0.862 | 0.840 | 87.65  | 45.60 | 20  | 35  | 250  | 28.8  | 8.76  |
| Q64264   | Isoform 2 of Ras-specific guanine nucleotide-releasing factor RalGPS2 OS=Mus musculus GN=Ralgs2 - [PPR26_MOUSE]                                  | 11.16 | 1  | 3  | 4  | 7   | 0.558  | 1.044 | 1.039 | 0.840 | 18.84  | 11.16 | 7   | 7   | 421  | 46.1  | 8.90  |
| Q9ERD6-2 | Protein phosphatase 1 regulatory subunit 26 OS=Mus musculus GN=Ppp1r26 PE=2 SV=2 - [PPR26_MOUSE]                                                 | 2.88  | 4  | 1  | 1  | 2   | 3.684  | 1.940 | 1.295 | 0.840 | 7.79   | 2.88  | 1   | 2   | 555  | 61.7  | 8.94  |
| Q6A025   | Isoform 2 of Protein odd-skipped-related 2 OS=Mus musculus GN=Osr2 - [OSR2_MOUSE]                                                                | 5.07  | 1  | 2  | 2  | 2   | 1.311  | 0.553 | 1.145 | 0.840 | 2.27   | 5.07  | 2   | 2   | 1163 | 124.9 | 8.76  |
| Q91ZD1-2 | Protein Sect16a OS=Mus musculus GN=Sec16a PE=2 SV=1 - [E9QAT4_MOUSE]                                                                             | 9.42  | 3  | 2  | 2  | 2   | 26.798 | 2.940 | 1.224 | 0.840 | 1.77   | 9.42  | 2   | 2   | 276  | 30.5  | 9.41  |
| E9QAT4   |                                                                                                                                                  | 27.15 | 4  | 46 | 47 | 141 | 1.612  | 1.005 | 1.150 | 0.840 | 418.25 | 27.15 | 71  | 141 | 2357 | 254.0 | 5.81  |

|          |                                                                                                    |       |    |    |    |     |       |       |       |       |        |       |    |     |      |       |       |
|----------|----------------------------------------------------------------------------------------------------|-------|----|----|----|-----|-------|-------|-------|-------|--------|-------|----|-----|------|-------|-------|
| E9Q6U4   | Protein Pfdn4 OS=Musculus GN=Pfdn4 PE=2 SV=1 - [E9Q6U4_MOUSE]                                      | 41.54 | 5  | 5  | 6  | 18  | 1.929 | 0.985 | 1.152 | 0.841 | 38.11  | 41.54 | 8  | 18  | 130  | 14.7  | 4.50  |
| B6ZND9   | EGAM1C OS=Musculus GN=Cxos1 PE=2 SV=1 - [B6ZND9_MOUSE]                                             | 8.45  | 2  | 1  | 1  | 3   | 2.009 | 1.153 | 0.967 | 0.841 | 7.77   | 8.45  | 1  | 3   | 142  | 17.2  | 9.38  |
| Q8R326   | Paraspeckle component 1 OS=Musculus GN=Pspc1 PE=1 SV=1 - [PSPC1_MOUSE]                             | 53.73 | 4  | 21 | 23 | 124 | 1.311 | 0.866 | 1.154 | 0.841 | 309.79 | 53.73 | 42 | 124 | 523  | 58.7  | 6.67  |
| Q06770   | Corticosteroid-binding globulin OS=Musculus GN=Serpina6 PE=1 SV=1 - [CBG_MOUSE]                    | 9.32  | 1  | 4  | 4  | 8   | 2.134 | 1.199 | 0.468 | 0.841 | 11.83  | 9.32  | 6  | 8   | 397  | 44.7  | 5.24  |
| E9PVA6   | ARF GTPase-activating protein GIT2 OS=Musculus GN=Glt2 PE=2 SV=1 - [E9PVA6_MOUSE]                  | 27.14 | 13 | 14 | 17 | 60  | 0.971 | 0.944 | 0.722 | 0.841 | 134.16 | 27.14 | 26 | 60  | 759  | 84.4  | 7.59  |
| Q8R050-2 | Isoform 2 of Eukaryotic peptide chain release factor ERF3A OS=Musculus GN=Gsp1 - [ERF3A_MOUSE]     | 37.95 | 3  | 10 | 22 | 94  | 1.485 | 0.946 | 0.968 | 0.841 | 283.65 | 37.95 | 41 | 94  | 635  | 68.5  | 5.21  |
| Q8BWX3   | Eukaryotic peptide chain release factor subunit 1 OS=Musculus GN=Erf1 PE=1 SV=4 - [ERF1_MOUSE]     | 37.76 | 1  | 14 | 14 | 30  | 0.692 | 0.872 | 0.762 | 0.841 | 99.17  | 37.76 | 22 | 30  | 437  | 49.0  | 5.71  |
| Q6ZPR6-2 | Isoform 2 of Inhibitor of Bruton tyrosine kinase OS=Musculus GN=Ittk - [IBTK_MOUSE]                | 3.84  | 2  | 3  | 3  | 3   | 1.110 | 0.942 | 0.944 | 0.841 | 4.51   | 3.84  | 3  | 3   | 1251 | 138.5 | 7.74  |
| M0QWQ7   | Semaphorin-3B OS=Musculus GN=Sema3b PE=4 SV=1 - [M0QWQ7_MOUSE]                                     | 8.05  | 3  | 2  | 2  | 4   | 4.955 | 2.211 | 0.584 | 0.841 | 4.39   | 8.05  | 2  | 4   | 534  | 59.1  | 7.71  |
| AZAR02   | Peptidyl-prolyl cis-trans isomerase G OS=Musculus GN=Ppig PE=1 SV=1 - [PP1G_MOUSE]                 | 11.17 | 2  | 7  | 7  | 16  | 0.522 | 0.768 | 0.861 | 0.841 | 46.73  | 11.17 | 11 | 16  | 752  | 88.3  | 10.27 |
| G3X8Q6   | Kinesin family member C2 OS=Musculus GN=Kifc2 PE=3 SV=1 - [G3X8Q6_MOUSE]                           | 7.70  | 2  | 5  | 5  | 9   | 1.907 | 1.194 | 1.244 | 0.841 | 21.71  | 7.70  | 9  | 9   | 792  | 85.5  | 6.16  |
| Q9D554   | Splicing factor 3A subunit 3 OS=Musculus GN=SF3a3 PE=2 SV=2 - [SF3A3_MOUSE]                        | 26.95 | 1  | 13 | 13 | 35  | 1.029 | 0.935 | 0.919 | 0.841 | 104.65 | 26.95 | 22 | 35  | 501  | 58.8  | 5.34  |
| P97333   | Neuropilin-1 OS=Musculus GN=Nrp1 PE=1 SV=2 - [NRP1_MOUSE]                                          | 12.35 | 1  | 9  | 9  | 27  | 0.569 | 0.714 | 0.571 | 0.841 | 75.26  | 12.35 | 15 | 27  | 923  | 102.9 | 5.90  |
| Q6DFY8   | Protein FAM5B OS=Musculus GN=Fam5b PE=2 SV=1 - [FAM5B_MOUSE]                                       | 9.83  | 1  | 7  | 8  | 16  | 0.736 | 1.614 | 1.115 | 0.841 | 39.75  | 9.83  | 13 | 16  | 783  | 89.2  | 7.88  |
| Q8R173   | Palmitoyltransferase ZDHHC3 OS=Musculus GN=Zdhc3 PE=1 SV=1 - [ZDHHC3_MOUSE]                        | 5.35  | 1  | 1  | 1  | 4   | 0.351 | 0.542 | 0.684 | 0.841 | 14.23  | 5.35  | 2  | 4   | 299  | 34.0  | 8.09  |
| Q8CFZ4   | Glypican-3 OS=Musculus GN=Gpc3 PE=2 SV=1 - [GPC3_MOUSE]                                            | 5.70  | 2  | 3  | 3  | 7   | 0.514 | 1.236 | 0.467 | 0.841 | 11.63  | 5.70  | 5  | 7   | 579  | 65.3  | 6.58  |
| F8VQK6   | Protein Fbx18 OS=Musculus GN=Fbx18 PE=2 SV=1 - [F8VQK6_MOUSE]                                      | 17.54 | 2  | 9  | 9  | 16  | 0.777 | 0.934 | 0.887 | 0.841 | 47.71  | 17.54 | 14 | 16  | 707  | 77.7  | 8.13  |
| Q99LT0   | Protein dpy-30 homolog OS=Musculus GN=Dpy30 PE=1 SV=1 - [DPY30_MOUSE]                              | 47.47 | 1  | 4  | 4  | 14  | 1.337 | 0.844 | 0.941 | 0.841 | 39.40  | 47.47 | 8  | 14  | 99   | 11.2  | 4.88  |
| Q6PAJ3   | GRB2-associated and regulator of MAPK protein-like OS=Musculus GN=Gareml PE=2 SV=2 - [GAREL_MOUSE] | 6.93  | 1  | 2  | 2  | 6   | 1.000 | 0.540 | 1.200 | 0.841 | 22.54  | 6.93  | 3  | 6   | 880  | 93.5  | 6.73  |
| Q9DCG9   | tRNA methyltransferase 112 homolog OS=Musculus GN=Trmt112 PE=2 SV=1 - [TR112_MOUSE]                | 27.20 | 2  | 3  | 3  | 13  | 1.420 | 1.065 | 1.141 | 0.842 | 33.65  | 27.20 | 5  | 13  | 125  | 14.1  | 5.27  |
| Q8CGZ0   | Calcium homeostasis endoplasmic reticulum protein OS=Musculus GN=Cherp PE=1 SV=1 - [CHERP_MOUSE]   | 8.12  | 2  | 8  | 8  | 19  | 1.071 | 0.876 | 1.003 | 0.842 | 46.96  | 8.12  | 15 | 19  | 936  | 106.1 | 9.14  |
| Q8VDM4   | Coiled-coil domain-containing protein 92 OS=Musculus GN=Ccdc92 PE=1 SV=1 - [CCD92_MOUSE]           | 58.28 | 3  | 16 | 16 | 61  | 2.029 | 0.582 | 1.083 | 0.842 | 169.82 | 58.28 | 27 | 61  | 314  | 35.2  | 9.38  |
| A2AWF8   | Receptor-type tyrosine-protein phosphatase eta OS=Musculus GN=Ptpj PE=2 SV=1 - [A2AWF8_MOUSE]      | 8.59  | 4  | 9  | 9  | 24  | 0.756 | 1.272 | 1.397 | 0.842 | 72.29  | 8.59  | 15 | 24  | 1164 | 128.6 | 5.39  |
| P51855   | Glutathione synthetase OS=Musculus GN=Gss PE=2 SV=1 - [GSHB_MOUSE]                                 | 49.58 | 5  | 22 | 22 | 93  | 2.364 | 0.625 | 0.708 | 0.842 | 243.88 | 49.58 | 40 | 93  | 474  | 52.2  | 5.80  |
| Q8R5H6   | Wiskott-Aldrich syndrome protein family member 1 OS=Musculus GN=Wasf1 PE=1 SV=2 - [WASF1_MOUSE]    | 35.42 | 1  | 16 | 19 | 115 | 0.918 | 1.685 | 1.536 | 0.842 | 369.53 | 35.42 | 35 | 115 | 559  | 61.5  | 6.37  |

|          |                                                                                                                 |       |    |    |    |     |       |       |       |       |        |       |    |     |      |       |       |
|----------|-----------------------------------------------------------------------------------------------------------------|-------|----|----|----|-----|-------|-------|-------|-------|--------|-------|----|-----|------|-------|-------|
| Q9D2W5   | GRAM domain-containing protein 3 OS=Mus musculus GN=Gramd3 PE=2 SV=1                                            | 5.32  | 2  | 1  | 1  | 2   | 0.743 | 0.886 | 1.024 | 0.842 | 9.18   | 5.32  | 1  | 2   | 432  | 47.9  | 7.75  |
| Q62313   | Trans-Golgi network integral membrane protein 1 OS=Mus musculus GN=Tgoln1 PE=1 SV=1 [TGON1_MOUSE]               | 5.10  | 2  | 2  | 2  | 3   | 1.094 | 1.031 | 0.821 | 0.842 | 9.24   | 5.10  | 3  | 3   | 353  | 37.8  | 5.34  |
| Q3TFF0   | Serine/arginine-rich-splicing factor 10 OS=Mus musculus GN=Srsf10 PE=2 SV=1 [Q3TFF0_MOUSE]                      | 35.71 | 4  | 3  | 6  | 15  | 0.501 | 1.003 | 0.870 | 0.842 | 48.96  | 35.71 | 11 | 15  | 182  | 22.1  | 10.33 |
| Q8CHY6   | Transcriptional repressor p66 alpha OS=Mus musculus GN=Gatad2a PE=1 SV=2                                        | 18.28 | 2  | 7  | 9  | 30  | 1.127 | 0.635 | 0.938 | 0.842 | 89.80  | 18.28 | 18 | 30  | 629  | 67.3  | 9.89  |
| Q8BYR2   | Serine/threonine-protein kinase LATS1 OS=Mus musculus GN=Lats1 PE=1 SV=3 [LATS1_MOUSE]                          | 5.76  | 1  | 4  | 5  | 10  | 1.202 | 0.977 | 0.984 | 0.842 | 23.50  | 5.76  | 7  | 10  | 1129 | 126.2 | 8.73  |
| Q02780-5 | Isoform 5 of Nuclear factor 1 A-type OS=Mus musculus GN=Nfia [NFIA_MOUSE]                                       | 16.09 | 13 | 3  | 5  | 11  | 1.013 | 0.884 | 0.982 | 0.842 | 25.02  | 16.09 | 9  | 11  | 466  | 51.5  | 7.77  |
| Q99K48   | Non-POU domain-containing octamer-binding protein OS=Mus musculus GN=Nono PE=1 SV=3 [NONO_MOUSE]                | 45.88 | 3  | 21 | 23 | 228 | 1.405 | 0.858 | 0.952 | 0.842 | 668.31 | 45.88 | 43 | 228 | 473  | 54.5  | 8.95  |
| Q9CR67   | Transmembrane protein 33 OS=Mus musculus GN=Tmem33 PE=2 SV=1 [TMM33_MOUSE]                                      | 22.27 | 3  | 4  | 5  | 11  | 0.903 | 0.827 | 0.815 | 0.842 | 29.84  | 22.27 | 8  | 11  | 247  | 28.0  | 9.66  |
| Q61823   | Programmed cell death protein 4 OS=Mus musculus GN=Pdc4 PE=1 SV=1 [PDCD4_MOUSE]                                 | 16.63 | 1  | 6  | 7  | 13  | 0.866 | 1.213 | 0.812 | 0.842 | 31.02  | 16.63 | 11 | 13  | 469  | 51.7  | 5.16  |
| Q5F2E8   | Serine/threonine-protein kinase TAO1 OS=Mus musculus GN=Taok1 PE=1 SV=1 [TAOK1_MOUSE]                           | 28.37 | 2  | 20 | 28 | 70  | 0.676 | 0.864 | 1.011 | 0.842 | 191.88 | 28.37 | 44 | 70  | 1001 | 116.0 | 7.55  |
| Q8BG7    | Survival of motor neuron-related-splicing factor 30 OS=Mus musculus GN=Smnnc1 PE=2 SV=1 [SPF30_MOUSE]           | 35.29 | 1  | 6  | 6  | 9   | 1.336 | 0.965 | 0.920 | 0.842 | 23.73  | 35.29 | 7  | 9   | 238  | 26.7  | 7.24  |
| Q8BGS2   | Bola-like protein 2 OS=Mus musculus GN=Bola2 PE=1 SV=1 [BOLA2_MOUSE]                                            | 58.14 | 2  | 5  | 5  | 19  | 2.467 | 0.789 | 1.047 | 0.843 | 44.93  | 58.14 | 8  | 19  | 86   | 10.2  | 6.16  |
| G3X997   | Metallo-beta-lactamase domain-containing protein 2 OS=Mus musculus GN=Mblac2 PE=4 SV=1 [G3X997_MOUSE]           | 55.56 | 2  | 13 | 13 | 60  | 0.697 | 1.322 | 0.690 | 0.843 | 186.34 | 55.56 | 24 | 60  | 279  | 31.2  | 6.86  |
| B2KG29   | Mediator of RNA polymerase II transcription subunit 21 OS=Mus musculus GN=Med21 PE=4 SV=1 [MED21_MOUSE]         | 22.22 | 2  | 1  | 1  | 3   | 1.336 | 1.115 | 1.272 | 0.843 | 12.15  | 22.22 | 2  | 3   | 90   | 9.7   | 4.35  |
| Q80V26   | Inositol monophosphatase 3 OS=Mus musculus GN=Impcd1 PE=1 SV=1 [IMPA3_MOUSE]                                    | 28.65 | 1  | 8  | 8  | 18  | 0.803 | 0.701 | 0.688 | 0.843 | 48.41  | 28.65 | 13 | 18  | 356  | 38.6  | 6.47  |
| Q5SR13   | Dedicator of cytokinesis protein 2 OS=Mus musculus GN=Dock2 PE=2 SV=2 [Q5SR13_MOUSE]                            | 2.30  | 3  | 2  | 3  | 4   | 0.751 | 0.906 | 0.835 | 0.843 | 5.64   | 2.30  | 4  | 4   | 1175 | 135.7 | 6.99  |
| E9Q1P5   | SH3 and multiple ankyrin repeat domains protein 3 (Fragment) OS=Mus musculus GN=Shank3 PE=2 SV=1 [SHANK3_MOUSE] | 41.91 | 1  | 1  | 5  | 11  | 1.314 | 1.335 | 2.158 | 0.843 | 42.05  | 41.91 | 8  | 11  | 136  | 15.3  | 9.82  |
| Q8C8I3   | Eukaryotic translation initiation factor 2D OS=Mus musculus GN=Elf2d PE=2 SV=1 [Q8C8I3_MOUSE]                   | 6.18  | 4  | 3  | 3  | 4   | 7.458 | 1.141 | 0.627 | 0.843 | 10.62  | 6.18  | 4  | 4   | 453  | 50.1  | 7.99  |
| Q8VI36-2 | Isoform Alpha of Paxillin OS=Mus musculus GN=Pxn [PAXI_MOUSE]                                                   | 29.44 | 3  | 10 | 10 | 37  | 1.509 | 1.153 | 1.026 | 0.843 | 115.71 | 29.44 | 19 | 37  | 557  | 60.8  | 6.27  |
| Q9CPW4   | Actin-related protein 2/3 complex subunit 5 OS=Mus musculus GN=Arpc5 PE=2 SV=3 [ARPC5_MOUSE]                    | 52.32 | 3  | 8  | 8  | 70  | 0.746 | 1.585 | 0.986 | 0.843 | 212.12 | 52.32 | 16 | 70  | 151  | 16.3  | 5.67  |
| D3Z6S1   | Transmembrane protein 214 OS=Mus musculus GN=Tmem214 PE=2 SV=1 [D3Z6S1_MOUSE]                                   | 22.90 | 4  | 12 | 13 | 45  | 0.572 | 0.666 | 0.728 | 0.843 | 104.29 | 22.90 | 23 | 45  | 642  | 71.3  | 9.41  |
| Q8BLQ7   | Cationic amino acid transporter 4 OS=Mus musculus GN=Slc7a4 PE=1 SV=1                                           | 7.87  | 5  | 3  | 3  | 8   | 0.928 | 1.069 | 0.764 | 0.844 | 11.80  | 7.87  | 5  | 8   | 635  | 68.3  | 7.08  |
| F2Z429   | Tudor domain-containing protein 6 OS=Mus musculus GN=Tdr6 PE=2 SV=1 [F2Z429_MOUSE]                              | 0.89  | 3  | 2  | 2  | 3   | 0.423 | 1.005 | 0.889 | 0.844 | 5.75   | 0.89  | 2  | 3   | 2134 | 237.9 | 5.35  |
| Q8CGM2   | Retinitis pigmentosa 1-like 1 protein OS=Mus musculus GN=Rpl11 PE=1 SV=1 [RP11_MOUSE]                           | 3.01  | 1  | 2  | 3  | 3   | 1.917 | 0.881 | 1.264 | 0.844 | 7.72   | 3.01  | 3  | 3   | 1859 | 199.6 | 6.48  |
| E9PY16   | Protein Adap1 OS=Mus musculus GN=Adap1 PE=2 SV=1 [E9PY16_MOUSE]                                                 | 49.20 | 2  | 18 | 18 | 83  | 0.751 | 0.761 | 0.911 | 0.844 | 247.87 | 49.20 | 31 | 83  | 374  | 43.3  | 8.65  |
| Q9E518   | Forkhead box protein J2 OS=Mus musculus GN=Foxj2 PE=2 SV=1 [FOXJ2_MOUSE]                                        | 2.48  | 1  | 1  | 1  | 4   | 1.088 | 1.051 | 1.018 | 0.844 | 13.81  | 2.48  | 2  | 4   | 565  | 61.5  | 6.65  |



|          |                                                                                                                          |       |    |    |    |     |       |       |       |       |        |       |    |     |      |       |       |
|----------|--------------------------------------------------------------------------------------------------------------------------|-------|----|----|----|-----|-------|-------|-------|-------|--------|-------|----|-----|------|-------|-------|
| Q5U405   | Transmembrane protease serine 13 OS=Mus musculus GN=Tmprss13 PE=2 SV=2 -                                                 | 3.31  | 2  | 1  | 2  | 132 | 0.797 | 1.400 | 0.877 | 0.844 | 143.97 | 3.31  | 3  | 132 | 543  | 59.8  | 9.01  |
| Q9Z1Q9   | Valine-tRNA ligase OS=Mus musculus GN=Vars PE=2 SV=1 - [SYVC_MOUSE]                                                      | 40.22 | 6  | 42 | 42 | 196 | 0.622 | 0.564 | 0.725 | 0.844 | 558.22 | 40.22 | 77 | 196 | 1263 | 140.1 | 7.77  |
| Q9QXN3   | Activating signal cointegrator 1 OS=Mus musculus GN=Trip4 PE=1 SV=2 - [TRIP4_MOUSE]                                      | 19.79 | 2  | 10 | 11 | 19  | 1.860 | 1.208 | 0.866 | 0.844 | 55.90  | 19.79 | 15 | 19  | 581  | 66.2  | 7.55  |
| Q9EQH2   | Endoplasmic reticulum aminopeptidase 1 OS=Mus musculus GN=Erap1 PE=2 SV=2 - [ERAP1_MOUSE]                                | 7.74  | 1  | 7  | 7  | 11  | 0.902 | 1.232 | 0.682 | 0.844 | 32.84  | 7.74  | 11 | 11  | 930  | 106.5 | 6.20  |
| O35618-2 | Isoform Short of Protein Mdm4 OS=Mus musculus GN=Mdm4 - [MDM4_MOUSE]                                                     | 9.45  | 2  | 1  | 1  | 4   | 1.065 | 1.275 | 1.214 | 0.844 | 6.55   | 9.45  | 2  | 4   | 127  | 14.1  | 8.35  |
| E9Q6J5   | Protein Bod1 OS=Mus musculus GN=Bod1 PE=2 SV=1 - [E9Q6J5_MOUSE]                                                          | 6.56  | 1  | 11 | 14 | 27  | 1.392 | 0.786 | 1.147 | 0.844 | 77.79  | 6.56  | 21 | 27  | 3032 | 327.3 | 5.33  |
| A0A4W9   | Neuronal growth regulator 1 OS=Mus musculus GN=Negr1 PE=2 SV=1 - [A0A4W9_MOUSE]                                          | 49.54 | 4  | 14 | 14 | 143 | 1.045 | 1.487 | 0.984 | 0.844 | 449.79 | 49.54 | 25 | 143 | 329  | 36.1  | 6.86  |
| Q6ZQI3   | Malectin OS=Mus musculus GN=Mlec PE=2 SV=2 - [MLEC_MOUSE]                                                                | 39.86 | 2  | 11 | 11 | 37  | 0.805 | 0.872 | 0.661 | 0.844 | 89.16  | 39.86 | 17 | 37  | 291  | 32.3  | 6.05  |
| O54782   | Epididymis-specific alpha-mannosidase OS=Mus musculus GN=Man2b2 PE=2 SV=2 - [MA2B2_MOUSE]                                | 5.21  | 2  | 4  | 4  | 7   | 0.967 | 1.263 | 0.721 | 0.844 | 21.26  | 5.21  | 7  | 7   | 1018 | 115.5 | 7.39  |
| Q9D706   | RNA polymerase II-associated protein 3 OS=Mus musculus GN=Rpap3 PE=1 SV=1 - [RPAP3_MOUSE]                                | 36.97 | 1  | 20 | 20 | 63  | 1.169 | 0.745 | 0.940 | 0.844 | 174.22 | 36.97 | 35 | 63  | 660  | 74.1  | 7.99  |
| Q9QYI3   | DnaJ homolog subfamily C member 7 OS=Mus musculus GN=Dnajc7 PE=1 SV=2 -                                                  | 42.51 | 3  | 21 | 21 | 60  | 0.972 | 0.736 | 0.918 | 0.844 | 166.82 | 42.51 | 34 | 60  | 494  | 56.4  | 6.49  |
| P14115   | 60S ribosomal protein L27a OS=Mus musculus GN=Rpl27a PE=2 SV=5 - [RL27A_MOUSE]                                           | 27.70 | 1  | 4  | 4  | 22  | 0.663 | 0.597 | 0.649 | 0.844 | 61.07  | 27.70 | 8  | 22  | 148  | 16.6  | 11.12 |
| O70279   | Protein DGCR14 OS=Mus musculus GN=Dgcr14 PE=2 SV=2 - [DGC14_MOUSE]                                                       | 15.03 | 2  | 5  | 5  | 11  | 1.124 | 0.879 | 1.078 | 0.844 | 39.24  | 15.03 | 8  | 11  | 479  | 52.6  | 6.70  |
| Q61733   | 28S ribosomal protein S31, mitochondrial OS=Mus musculus GN=Mps31 PE=2 SV=1 - [RT31_MOUSE]                               | 28.65 | 1  | 9  | 10 | 29  | 1.163 | 0.593 | 1.089 | 0.844 | 72.18  | 28.65 | 18 | 29  | 384  | 43.9  | 8.51  |
| P62245   | 40S ribosomal protein S15a OS=Mus musculus GN=Rps15a PE=2 SV=2 - [RS15A_MOUSE]                                           | 66.92 | 4  | 9  | 9  | 50  | 0.566 | 0.666 | 0.714 | 0.845 | 150.49 | 66.92 | 18 | 50  | 130  | 14.8  | 10.13 |
| Q99N94   | 39S ribosomal protein L9, mitochondrial OS=Mus musculus GN=Mrp9 PE=2 SV=2 - [RM09_MOUSE]                                 | 21.13 | 2  | 5  | 5  | 11  | 0.585 | 0.572 | 0.895 | 0.845 | 34.22  | 21.13 | 9  | 11  | 265  | 30.2  | 10.08 |
| AZARV4   | Low-density lipoprotein receptor-related protein 2 OS=Mus musculus GN=Lrp2 PE=1 SV=1 - [LRP2_MOUSE]                      | 2.55  | 3  | 4  | 5  | 5   | 2.039 | 1.251 | 0.931 | 0.845 | 4.70   | 2.55  | 5  | 5   | 4660 | 518.9 | 5.15  |
| Q149F1   | RNA pseudouridylate synthase domain-containing protein 2 OS=Mus musculus GN=Rpusd2 PE=2 SV=2 - [RUS2_MOUSE]              | 11.03 | 1  | 4  | 4  | 6   | 0.512 | 0.981 | 1.372 | 0.845 | 16.88  | 11.03 | 5  | 6   | 553  | 61.5  | 6.77  |
| D3ZSF7   | Protein Gm20521 OS=Mus musculus GN=Gm20521 PE=2 SV=1 - [D3ZSF7_MOUSE]                                                    | 34.83 | 11 | 8  | 8  | 26  | 1.087 | 0.781 | 0.943 | 0.845 | 79.04  | 34.83 | 15 | 26  | 333  | 37.2  | 8.40  |
| Q3UG37   | Histone deacetylase 6 (Fragment) OS=Mus musculus GN=Hdac6 PE=2 SV=1 - [Q3UG37_MOUSE]                                     | 21.11 | 3  | 15 | 15 | 69  | 0.678 | 0.776 | 0.867 | 0.845 | 231.49 | 21.11 | 27 | 69  | 1009 | 110.2 | 5.83  |
| Q9D3B1   | Very-long-chain (3R)-3-hydroxyacyl-[acyl-carrier protein] dehydratase 2 OS=Mus musculus GN=Ptlb PE=2 SV=1 - [PTLB_MOUSE] | 10.63 | 1  | 2  | 2  | 5   | 1.065 | 1.336 | 0.797 | 0.845 | 11.75  | 10.63 | 3  | 5   | 254  | 28.4  | 9.58  |
| Q8VHR5   | Transcriptional repressor p66-beta OS=Mus musculus GN=Gatad2b PE=1 SV=1 -                                                | 42.09 | 2  | 18 | 20 | 70  | 1.181 | 0.941 | 1.117 | 0.845 | 223.47 | 42.09 | 32 | 70  | 594  | 65.4  | 9.70  |
| Q8BGT6   | MICAL-like protein 1 OS=Mus musculus GN=Mical1 PE=1 SV=3 - [MILK1_MOUSE]                                                 | 30.80 | 3  | 18 | 20 | 78  | 1.368 | 0.291 | 0.960 | 0.845 | 248.59 | 30.80 | 35 | 78  | 870  | 94.0  | 6.68  |
| Q9Z2W9   | Glutamate receptor 3 OS=Mus musculus GN=Gria3 PE=1 SV=2 - [GRIA3_MOUSE]                                                  | 33.33 | 3  | 1  | 28 | 107 | 1.076 | 1.788 | 1.637 | 0.845 | 283.93 | 33.33 | 49 | 107 | 888  | 100.5 | 8.38  |
| Q9DB15   | 39S ribosomal protein L12, mitochondrial OS=Mus musculus GN=Mpl12 PE=1 SV=2 - [RM12_MOUSE]                               | 46.77 | 1  | 8  | 8  | 42  | 1.723 | 0.892 | 1.073 | 0.845 | 116.63 | 46.77 | 14 | 42  | 201  | 21.7  | 9.29  |

|          |                                                                                                                     |       |   |    |    |     |       |       |       |       |        |       |    |     |      |       |       |
|----------|---------------------------------------------------------------------------------------------------------------------|-------|---|----|----|-----|-------|-------|-------|-------|--------|-------|----|-----|------|-------|-------|
| Q9EQG7   | Ectonucleotide pyrophosphatase/phosphodiesterase family member 5 OS=Mus musculus GN=Enpp5 PE=2 SV=3 - [ENPP5_MOUSE] | 10.48 | 1 | 3  | 4  | 18  | 1.085 | 1.151 | 0.848 | 0.846 | 51.34  | 10.48 | 7  | 18  | 477  | 54.4  | 5.90  |
| Q61937   | Nucleophosmin OS=Mus musculus GN=Npm1 PE=1 SV=1 - [NPM_MOUSE]                                                       | 57.19 | 5 | 18 | 18 | 100 | 1.010 | 0.676 | 1.118 | 0.846 | 276.36 | 57.19 | 31 | 100 | 292  | 32.5  | 4.77  |
| Q8C0D7-4 | Isoform 4 of Inhibitor of growth protein 4 OS=Mus musculus GN=Ing4 - [ING4_MOUSE]                                   | 4.82  | 5 | 1  | 1  | 3   | 1.236 | 0.691 | 1.043 | 0.846 | 9.19   | 4.82  | 2  | 3   | 166  | 19.2  | 8.47  |
| P21841   | Pulmonary surfactant-associated protein C OS=Mus musculus GN=Stpc PE=2 SV=1 - [PSPC_MOUSE]                          | 8.81  | 2 | 1  | 1  | 22  | 0.770 | 1.384 | 0.914 | 0.846 | 0.00   | 8.81  | 1  | 22  | 193  | 21.0  | 6.90  |
| Q3UFY0   | Ribosomal RNA processing protein 36 homolog OS=Mus musculus GN=Rrp36 PE=2 SV=1 - [RRP36_MOUSE]                      | 2.87  | 1 | 1  | 1  | 4   | 1.701 | 3.145 | 0.720 | 0.846 | 12.93  | 2.87  | 1  | 4   | 244  | 28.6  | 10.56 |
| Q01098   | Glutamate receptor ionotropic, NMDA 2C OS=Mus musculus GN=Grin2c PE=2 SV=2 - [NMDE3_MOUSE]                          | 1.78  | 1 | 1  | 2  | 2   | 1.739 | 1.259 | 0.666 | 0.846 | 4.43   | 1.78  | 2  | 2   | 1239 | 135.3 | 8.66  |
| D3Z0A2   | Protein arginine N-methyltransferase 1 OS=Mus musculus GN=Prrn1 PE=2 SV=1 - [D3Z0A2_MOUSE]                          | 40.88 | 6 | 9  | 12 | 30  | 1.093 | 1.197 | 0.760 | 0.846 | 88.50  | 40.88 | 19 | 30  | 318  | 36.5  | 6.19  |
| Q9CR09   | Ubiquitin-fold modifier-conjugating enzyme 1 OS=Mus musculus GN=Ufc1 PE=2 SV=1 - [UFC1_MOUSE]                       | 32.34 | 2 | 8  | 8  | 23  | 1.294 | 0.871 | 0.890 | 0.846 | 56.36  | 32.34 | 12 | 23  | 167  | 19.5  | 7.40  |
| F8VQ54   | Endoribonuclease Dicer OS=Mus musculus GN=Dicer1 PE=2 SV=1 - [F8VQ54_MOUSE]                                         | 2.73  | 6 | 4  | 5  | 6   | 0.654 | 0.847 | 0.667 | 0.846 | 15.15  | 2.73  | 6  | 6   | 1906 | 215.6 | 5.80  |
| Q3T202   | Cytohesin-1 OS=Mus musculus GN=Cyth1 PE=2 SV=1 - [Q3T202_MOUSE]                                                     | 46.25 | 6 | 12 | 18 | 54  | 1.082 | 1.092 | 1.096 | 0.846 | 132.92 | 46.25 | 27 | 54  | 400  | 46.4  | 5.74  |
| Q91W59-2 | Isoform 2 of RNA-binding motif, single-stranded-interacting protein 1 OS=Mus musculus GN=Rbms1 - [RBM1_MOUSE]       | 16.49 | 4 | 3  | 5  | 12  | 1.115 | 0.560 | 1.053 | 0.846 | 45.22  | 16.49 | 8  | 12  | 370  | 40.0  | 8.12  |
| Q61543   | Golgi apparatus protein 1 OS=Mus musculus GN=Glgl1 PE=1 SV=1 - [GSLG1_MOUSE]                                        | 37.45 | 4 | 41 | 41 | 136 | 0.941 | 0.725 | 0.790 | 0.846 | 405.23 | 37.45 | 67 | 136 | 1175 | 133.6 | 6.84  |
| Q8K2K6-3 | Isoform 3 of Arf-GAP domain and FG repeat-containing protein 1 OS=Mus musculus GN=Agfg1 - [AFG1_MOUSE]              | 26.04 | 4 | 10 | 12 | 62  | 1.502 | 1.028 | 1.126 | 0.846 | 199.94 | 26.04 | 23 | 62  | 530  | 55.0  | 8.47  |
| Q60967   | Bifunctional 3'-phosphoadenosine 5'-phosphosulfate synthase 1 OS=Mus musculus GN=Paps1 PE=2 SV=1 - [PAPS1_MOUSE]    | 36.86 | 1 | 16 | 19 | 63  | 0.870 | 0.691 | 0.762 | 0.846 | 181.68 | 36.86 | 33 | 63  | 624  | 70.7  | 6.77  |
| P68040   | Guanine nucleotide-binding protein subunit beta-2-like 1 OS=Mus musculus GN=Gnb2l1 PE=1 SV=3 - [G2L1_MOUSE]         | 60.88 | 1 | 17 | 17 | 73  | 0.733 | 0.844 | 0.714 | 0.846 | 229.03 | 60.88 | 29 | 73  | 317  | 35.1  | 7.69  |
| E9PX94   | Coiled-coil and C2 domain-containing protein 1A OS=Mus musculus GN=Cc2d1a PE=2 SV=2 - [E9PX94_MOUSE]                | 36.23 | 1 | 2  | 30 | 86  | 0.957 | 0.933 | 1.005 | 0.846 | 239.17 | 36.23 | 54 | 86  | 897  | 98.6  | 7.36  |
| Q99KN2   | Probable cytosolic iron-sulfur protein assembly protein CIAO1 OS=Mus musculus GN=Ciao1 PE=2 SV=1 - [CIAO1_MOUSE]    | 15.34 | 4 | 4  | 4  | 16  | 1.979 | 1.164 | 0.968 | 0.846 | 49.76  | 15.34 | 6  | 16  | 339  | 37.6  | 4.88  |
| Q62318   | Transcription intermediary factor 1-beta OS=Mus musculus GN=Trim28 PE=1 SV=3 - [TRIM28_MOUSE]                       | 41.85 | 2 | 26 | 26 | 148 | 0.847 | 1.075 | 0.792 | 0.847 | 477.81 | 41.85 | 44 | 148 | 834  | 88.8  | 5.77  |
| Q3TUE1   | Far upstream element-binding protein 1 OS=Mus musculus GN=Fubp1 PE=2 SV=1 - [Q3TUE1_MOUSE]                          | 49.84 | 1 | 2  | 28 | 172 | 1.649 | 1.245 | 1.200 | 0.847 | 444.63 | 49.84 | 49 | 172 | 642  | 67.4  | 7.61  |
| B2RVL6   | Zinc finger CCHC domain-containing protein 24 OS=Mus musculus GN=Zcchc24 PE=2 SV=1 - [ZCH24_MOUSE]                  | 7.05  | 1 | 2  | 2  | 4   | 1.219 | 0.521 | 0.956 | 0.847 | 8.64   | 7.05  | 4  | 4   | 241  | 26.9  | 8.70  |
| O88444   | Adenylate cyclase type 1 OS=Mus musculus GN=Adcy1 PE=2 SV=2 - [ADCY1_MOUSE]                                         | 12.16 | 1 | 10 | 11 | 27  | 0.396 | 0.757 | 0.946 | 0.847 | 93.68  | 12.16 | 19 | 27  | 1118 | 123.3 | 8.47  |
| Q3UHQ5-2 | Isoform 2 of Protein dopey 2 OS=Mus musculus GN=Dopey2 - [DOP2_MOUSE]                                               | 8.82  | 6 | 14 | 15 | 23  | 0.645 | 0.934 | 0.834 | 0.847 | 78.40  | 8.82  | 23 | 23  | 2177 | 243.9 | 6.01  |
| F8VQC7   | Kinectin OS=Mus musculus GN=Ktn1 PE=2 SV=1 - [F8VQC7_MOUSE]                                                         | 47.10 | 2 | 5  | 58 | 190 | 1.892 | 0.735 | 1.138 | 0.847 | 538.28 | 47.10 | 98 | 190 | 1327 | 152.4 | 5.90  |

|          |                                                                                                                              |       |    |    |    |     |       |       |       |       |         |       |     |     |      |       |      |
|----------|------------------------------------------------------------------------------------------------------------------------------|-------|----|----|----|-----|-------|-------|-------|-------|---------|-------|-----|-----|------|-------|------|
| Q8BL66   | Early endosome antigen 1<br>OS=Mus musculus<br>GN=Eaa1 PE=1 SV=2 -<br>[EAA1_MOUSE]                                           | 57.26 | 5  | 83 | 90 | 417 | 1.429 | 0.854 | 1.128 | 0.847 | 1130.16 | 57.26 | 162 | 417 | 1411 | 160.8 | 5.77 |
| Q8BG15-5 | Isoform 5 of CTD small phosphatase-like protein 2<br>OS=Mus musculus<br>GN=Ctdspl2 -<br>[CTSL2_MOUSE]                        | 5.08  | 6  | 2  | 2  | 7   | 0.340 | 0.409 | 0.958 | 0.847 | 23.92   | 5.08  | 4   | 7   | 256  | 28.1  | 5.82 |
| Q9R1Z8   | Vinexin OS=Mus musculus<br>GN=Sorts3 PE=1 SV=1 -<br>[VINEX_MOUSE]                                                            | 11.73 | 1  | 8  | 8  | 26  | 1.812 | 0.998 | 0.897 | 0.847 | 80.38   | 11.73 | 14  | 26  | 733  | 82.3  | 9.20 |
| Q8CCF0-3 | Isoform 3 of U4/U6 small nuclear ribonucleoprotein Prp31<br>OS=Mus musculus<br>GN=Prp31 -<br>[PRP31_MOUSE]                   | 25.05 | 5  | 12 | 13 | 38  | 0.692 | 0.666 | 0.877 | 0.847 | 93.05   | 25.05 | 23  | 38  | 495  | 55.0  | 5.90 |
| Q9Z1N5   | Spliceosome RNA helicase Ddx39b<br>OS=Mus musculus<br>GN=Ddx39b PE=1 SV=1 -<br>[DX39B_MOUSE]                                 | 45.56 | 2  | 9  | 19 | 133 | 0.504 | 0.962 | 0.784 | 0.847 | 402.62  | 45.56 | 36  | 133 | 428  | 49.0  | 5.67 |
| F6ZV59   | Heterogeneous nuclear ribonucleoprotein D0 (Fragment)<br>OS=Mus musculus<br>GN=Hnmpd PE=4 SV=1 -<br>[HNMPP_MOUSE]            | 52.78 | 11 | 11 | 13 | 132 | 1.050 | 0.601 | 1.074 | 0.847 | 374.25  | 52.78 | 23  | 132 | 216  | 24.7  | 9.52 |
| P21661   | Neuroendocrine convertase 2<br>OS=Mus musculus<br>GN=Pcsk2 PE=2 SV=1 -<br>[NEC2_MOUSE]                                       | 22.14 | 1  | 11 | 11 | 48  | 1.034 | 1.234 | 0.768 | 0.847 | 167.88  | 22.14 | 19  | 48  | 637  | 70.7  | 6.42 |
| P48725-3 | Isoform 3 of Pericentrin<br>OS=Mus musculus<br>GN=Pcnt -<br>[PCNT_MOUSE]                                                     | 7.24  | 4  | 14 | 17 | 30  | 0.801 | 0.991 | 1.132 | 0.847 | 72.38   | 7.24  | 21  | 30  | 2500 | 284.4 | 5.08 |
| Q9CR39   | WD repeat domain phosphoinositide-interacting protein 3<br>OS=Mus musculus<br>GN=Wdr45b PE=2 SV=2 -<br>[WDR45B_MOUSE]        | 20.64 | 3  | 5  | 6  | 21  | 1.625 | 0.976 | 0.733 | 0.847 | 72.58   | 20.64 | 10  | 21  | 344  | 38.0  | 7.56 |
| Q99M87   | DnaJ homolog subfamily A member 3, mitochondrial<br>OS=Mus musculus<br>GN=Dnaja3 PE=1 SV=1 -<br>[DNJA3_MOUSE]                | 46.25 | 2  | 2  | 17 | 76  | 1.650 | 0.785 | 0.923 | 0.847 | 258.03  | 46.25 | 31  | 76  | 480  | 52.4  | 9.22 |
| E9Q8T1   | Transforming acidic coiled-coil-containing protein 2<br>OS=Mus musculus<br>GN=Tacc2 PE=2 SV=1 -<br>[E9Q8T1_MOUSE]            | 10.94 | 7  | 22 | 26 | 72  | 1.401 | 0.673 | 1.172 | 0.847 | 173.82  | 10.94 | 39  | 72  | 2879 | 305.0 | 4.79 |
| Q9Z2A9-2 | Isoform 2 of Gamma-glutamyltransferase 5<br>OS=Mus musculus<br>GN=Ggt5 -<br>[GGT5_MOUSE]                                     | 3.51  | 3  | 1  | 2  | 3   | 1.810 | 1.562 | 0.738 | 0.848 | 6.80    | 3.51  | 3   | 3   | 456  | 49.3  | 7.84 |
| Q9ESU6   | Bromodomain-containing protein 4<br>OS=Mus musculus<br>GN=Brd4 PE=1 SV=2 -<br>[BRD4_MOUSE]                                   | 7.79  | 5  | 7  | 11 | 27  | 0.720 | 0.827 | 0.886 | 0.848 | 66.99   | 7.79  | 17  | 27  | 1400 | 155.8 | 9.19 |
| Q7T5V4   | Phosphoglucomutase-2<br>OS=Mus musculus<br>GN=Pgm2 PE=1 SV=1 -<br>[PGM2_MOUSE]                                               | 27.90 | 1  | 15 | 15 | 45  | 1.022 | 0.878 | 0.714 | 0.848 | 106.99  | 27.90 | 26  | 45  | 620  | 68.7  | 6.14 |
| Q3UHX2   | 28 kDa heat- and acid-stable phosphoprotein<br>OS=Mus musculus<br>GN=Pdap1 PE=1 SV=1 -<br>[HAP28_MOUSE]                      | 33.70 | 1  | 8  | 8  | 73  | 1.197 | 0.530 | 1.465 | 0.848 | 213.76  | 33.70 | 15  | 73  | 181  | 20.6  | 7.39 |
| O88569   | Heterogeneous nuclear ribonucleoproteins A2/B1<br>OS=Mus musculus<br>GN=Hnmpa2b1 PE=1 SV=2 -<br>[ROA2_MOUSE]                 | 68.27 | 3  | 24 | 27 | 646 | 1.636 | 0.873 | 1.153 | 0.848 | 2169.44 | 68.27 | 52  | 646 | 353  | 37.4  | 8.95 |
| Q64310   | Surfeit locus protein 4<br>OS=Mus musculus<br>GN=Surf4 PE=2 SV=1 -<br>[SURF4_MOUSE]                                          | 17.47 | 3  | 4  | 4  | 21  | 0.503 | 0.965 | 0.635 | 0.848 | 59.43   | 17.47 | 8   | 21  | 269  | 30.4  | 7.78 |
| Q7M739   | Nuclear pore complex-associated intranuclear coiled-coil protein TPR<br>OS=Mus musculus<br>GN=Tpr PE=2 SV=1 -<br>[TPR_MOUSE] | 34.92 | 8  | 74 | 75 | 350 | 1.580 | 0.977 | 1.165 | 0.848 | 986.49  | 34.92 | 133 | 350 | 2357 | 266.8 | 5.01 |
| Q5U4C9   | Dual specificity tyrosine-phosphorylation-regulated kinase 2<br>OS=Mus musculus<br>GN=Dyrk2 PE=2 SV=1 -<br>[DYRK2_MOUSE]     | 8.18  | 2  | 4  | 5  | 8   | 2.193 | 0.745 | 1.328 | 0.848 | 18.92   | 8.18  | 7   | 8   | 599  | 66.5  | 9.67 |
| Q9DAC7   | Tetratricopeptide repeat protein 32<br>OS=Mus musculus<br>GN=Ttc32 PE=2 SV=1 -<br>[TTC32_MOUSE]                              | 10.14 | 1  | 1  | 1  | 1   | 2.617 | 0.958 | 1.092 | 0.848 | 4.62    | 10.14 | 1   | 1   | 148  | 16.8  | 5.40 |
| Q8BKG3   | Inactive tyrosine-protein kinase 7<br>OS=Mus musculus<br>GN=Ptk7 PE=1 SV=1 -<br>[PTK7_MOUSE]                                 | 13.94 | 1  | 12 | 13 | 30  | 0.860 | 1.019 | 0.743 | 0.849 | 85.18   | 13.94 | 22  | 30  | 1062 | 117.5 | 6.84 |
| J3QSN2   | Ubiquitin carboxyl-terminal hydrolase OS=Mus musculus<br>GN=Usp13 PE=3 SV=1 -<br>[J3QSN2_MOUSE]                              | 15.40 | 3  | 9  | 9  | 18  | 0.964 | 1.182 | 0.892 | 0.849 | 43.95   | 15.40 | 15  | 18  | 857  | 96.5  | 5.49 |
| P70365-4 | Isoform 4 of Nuclear receptor coactivator 1<br>OS=Mus musculus<br>GN=Ncoa1 -                                                 | 9.32  | 4  | 8  | 8  | 20  | 1.361 | 1.381 | 1.235 | 0.849 | 58.13   | 9.32  | 15  | 20  | 1330 | 144.7 | 6.24 |
| E0CZAS   | Neurexin-1<br>OS=Mus musculus<br>GN=Nrxn1 PE=2 SV=1 -<br>[E0CZAS_MOUSE]                                                      | 34.89 | 6  | 1  | 42 | 183 | 0.468 | 0.826 | 0.903 | 0.849 | 550.87  | 34.89 | 74  | 183 | 1476 | 162.1 | 5.99 |

|          |                                                                                                                              |       |   |    |    |     |       |       |       |       |        |       |    |     |      |       |      |
|----------|------------------------------------------------------------------------------------------------------------------------------|-------|---|----|----|-----|-------|-------|-------|-------|--------|-------|----|-----|------|-------|------|
| Q9D9E0-2 | Isoform 2 of Solute carrier family 22 member 17<br>OS=Mus musculus<br>GN=Slc22a17 -                                          | 8.74  | 2 | 4  | 4  | 13  | 0.506 | 0.864 | 0.622 | 0.849 | 34.42  | 8.74  | 6  | 13  | 366  | 39.9  | 8.43 |
| F2Z4B7   | Protein Raph1 OS=Mus musculus GN=Raph1 PE=2 SV=1 - [F2Z4B7_MOUSE]                                                            | 26.05 | 5 | 15 | 16 | 33  | 1.036 | 0.975 | 0.994 | 0.849 | 82.25  | 26.05 | 25 | 33  | 645  | 72.7  | 6.35 |
| Q8VDI9   | Alpha-1,2-mannosyltransferase ALG9<br>OS=Mus musculus<br>GN=Alg9 PE=2 SV=1 -                                                 | 6.06  | 2 | 3  | 3  | 4   | 0.476 | 0.763 | 0.733 | 0.849 | 6.52   | 6.06  | 4  | 4   | 611  | 69.5  | 8.94 |
| Q9JKS5   | Intracellular hyaluronan-binding protein 4 OS=Mus musculus GN=Habp4 PE=2 SV=2 - [HABP4_MOUSE]                                | 30.17 | 2 | 10 | 10 | 51  | 1.428 | 0.525 | 1.060 | 0.849 | 139.34 | 30.17 | 18 | 51  | 411  | 45.9  | 6.84 |
| P58283   | E3 ubiquitin-protein ligase RNF216 OS=Mus musculus GN=Rnf216 PE=1 SV=3 - [RNF216_MOUSE]                                      | 7.03  | 4 | 4  | 5  | 12  | 1.160 | 1.257 | 1.010 | 0.849 | 29.07  | 7.03  | 6  | 12  | 853  | 97.6  | 5.01 |
| K4DI59   | DNA ligase OS=Mus musculus GN=Lig3 PE=3 SV=1 - [K4DI59_MOUSE]                                                                | 9.74  | 7 | 7  | 7  | 11  | 1.754 | 0.880 | 0.925 | 0.849 | 33.65  | 9.74  | 11 | 11  | 1016 | 113.1 | 8.98 |
| F8VQK5   | SAM and SH3 domain-containing protein 1 OS=Mus musculus GN=Sash1 PE=2 SV=1 - [F8VQK5_MOUSE]                                  | 25.45 | 2 | 27 | 27 | 65  | 0.829 | 0.578 | 0.971 | 0.849 | 175.28 | 25.45 | 41 | 65  | 1230 | 135.5 | 6.20 |
| O88998   | Noelin OS=Mus musculus GN=Olfm1 PE=1 SV=1 - [NOE1_MOUSE]                                                                     | 31.96 | 7 | 12 | 12 | 57  | 1.006 | 1.890 | 1.500 | 0.849 | 154.29 | 31.96 | 19 | 57  | 485  | 55.4  | 6.95 |
| P56183-2 | Isoform 2 of Ribosomal RNA processing protein 1 homolog A OS=Mus musculus GN=Rrp1 - [RRP1_MOUSE]                             | 4.74  | 3 | 2  | 2  | 3   | 0.649 | 1.279 | 0.794 | 0.849 | 8.82   | 4.74  | 3  | 3   | 443  | 50.0  | 8.24 |
| Q8VCE1   | DnaJ homolog subfamily C member 28 OS=Mus musculus GN=Dnajc28 PE=2 SV=2 -                                                    | 7.01  | 3 | 3  | 3  | 8   | 2.220 | 1.675 | 1.095 | 0.849 | 22.32  | 7.01  | 6  | 8   | 385  | 44.8  | 8.65 |
| P63087-2 | Isoform Gamma-2 of Serine/threonine-protein phosphatase PP1-gamma catalytic subunit OS=Mus musculus GN=Ppp1cc - [PP1G_MOUSE] | 55.49 | 2 | 3  | 17 | 151 | 1.376 | 0.943 | 1.007 | 0.849 | 470.52 | 55.49 | 32 | 151 | 337  | 38.5  | 6.13 |
| Q60973   | Histone-binding protein RBBP7 OS=Mus musculus GN=Rbbp7 PE=1 SV=1 - [RBBP7_MOUSE]                                             | 32.00 | 4 | 1  | 12 | 61  | 1.821 | 2.153 | 0.815 | 0.849 | 166.39 | 32.00 | 19 | 61  | 425  | 47.8  | 5.05 |
| Q3UTQ8   | Cyclin-dependent kinase-like 5 OS=Mus musculus GN=Cdkl5 PE=2 SV=1 - [CDKLS_MOUSE]                                            | 25.91 | 3 | 19 | 20 | 72  | 0.925 | 1.002 | 1.600 | 0.849 | 176.08 | 25.91 | 36 | 72  | 938  | 105.4 | 9.58 |
| P49586   | Choline-phosphate cytidyltransferase A OS=Mus musculus GN=Pcyt1a PE=1 SV=1 - [PCY1A_MOUSE]                                   | 37.60 | 2 | 8  | 12 | 30  | 1.042 | 0.706 | 0.844 | 0.849 | 80.43  | 37.60 | 21 | 30  | 367  | 41.6  | 7.03 |
| O55074   | A-kinase anchor protein 7 isoform alpha OS=Mus musculus GN=Akap7 PE=1 SV=4 - [AKA7A_MOUSE]                                   | 38.27 | 2 | 4  | 4  | 32  | 0.586 | 0.982 | 0.879 | 0.849 | 101.73 | 38.27 | 7  | 32  | 81   | 9.2   | 5.27 |
| Q920Q6-3 | Isoform 3 of RNA-binding protein Musashi homolog 2 OS=Mus musculus GN=Msi2 - [MSI2H_MOUSE]                                   | 36.88 | 5 | 7  | 8  | 29  | 1.098 | 0.740 | 0.819 | 0.849 | 78.66  | 36.88 | 16 | 29  | 282  | 30.9  | 9.10 |
| D3YZE7   | Protein 2700050L05Rik OS=Mus musculus GN=2700050L05Rik PE=4 SV=2 - [D3YZE7_MOUSE]                                            | 1.24  | 3 | 1  | 1  | 1   | 0.830 | 1.524 | 0.677 | 0.849 | 1.90   | 1.24  | 1  | 1   | 1206 | 135.3 | 6.24 |
| P13011   | Acyl-CoA desaturase 2 OS=Mus musculus GN=Scd2 PE=2 SV=2 - [ACOD2_MOUSE]                                                      | 3.91  | 3 | 2  | 2  | 5   | 0.656 | 0.401 | 0.722 | 0.850 | 11.56  | 3.91  | 3  | 5   | 358  | 40.9  | 9.01 |
| Q9EQI8   | 39S ribosomal protein L46, mitochondrial OS=Mus musculus GN=Mrip46 PE=2 SV=1 - [RM46_MOUSE]                                  | 38.87 | 1 | 9  | 9  | 19  | 1.191 | 1.107 | 0.768 | 0.850 | 56.78  | 38.87 | 13 | 19  | 283  | 32.1  | 7.40 |
| O08807   | Peroxiredoxin-4 OS=Mus musculus GN=Prdx4 PE=1 SV=1 - [PRDX4_MOUSE]                                                           | 38.69 | 2 | 6  | 8  | 145 | 1.825 | 0.902 | 0.751 | 0.850 | 335.12 | 38.69 | 15 | 145 | 274  | 31.0  | 7.15 |
| Q64355   | Embryonal Fyn-associated substrate OS=Mus musculus GN=Efs PE=1 SV=2 - [EFS_MOUSE]                                            | 6.61  | 1 | 2  | 2  | 5   | 1.402 | 0.837 | 0.930 | 0.850 | 9.68   | 6.61  | 3  | 5   | 560  | 58.9  | 5.12 |
| O35841   | Apoptosis inhibitor 5 OS=Mus musculus GN=Api5 PE=2 SV=2 - [APIS_MOUSE]                                                       | 46.63 | 1 | 20 | 21 | 69  | 0.702 | 1.028 | 0.807 | 0.850 | 214.94 | 46.63 | 35 | 69  | 504  | 56.7  | 5.92 |
| Q6P1E7-2 | Isoform 2 of Coiled-coil domain-containing protein 111 OS=Mus musculus GN=Ccdc111 - [CC111_MOUSE]                            | 4.88  | 1 | 1  | 1  | 1   | 1.163 | 1.086 | 1.035 | 0.850 | 0.00   | 4.88  | 1  | 1   | 328  | 37.9  | 8.32 |
| F8VQK0   | Protein Nirp4g OS=Mus musculus GN=Nirp4g PE=2 SV=2 - [F8VQK0_MOUSE]                                                          | 2.01  | 3 | 1  | 2  | 4   | 1.910 | 0.740 | 1.106 | 0.850 | 6.93   | 2.01  | 2  | 4   | 646  | 74.3  | 6.52 |
| G3XBR5   | Glutamine-rich protein 1 OS=Mus musculus GN=Qrich1 PE=4 SV=1 - [G3XBR5_MOUSE]                                                | 3.73  | 2 | 3  | 3  | 5   | 1.484 | 1.184 | 1.073 | 0.850 | 14.56  | 3.73  | 5  | 5   | 777  | 86.5  | 5.87 |

|          |                                                                                                           |       |   |    |    |     |       |       |       |       |         |       |    |     |      |       |       |
|----------|-----------------------------------------------------------------------------------------------------------|-------|---|----|----|-----|-------|-------|-------|-------|---------|-------|----|-----|------|-------|-------|
| Q8WY4    | Anamorsin OS=Mus musculus GN=Gapin1 PE=1 SV=1 - [CPIN1_MOUSE]                                             | 44.01 | 4 | 9  | 9  | 42  | 1.319 | 0.701 | 1.021 | 0.850 | 158.24  | 44.01 | 16 | 42  | 309  | 33.4  | 5.20  |
| P61222   | ATP-binding cassette sub-family E member 1 OS=Mus musculus GN=Abce1 PE=2 SV=1 - [ABCE1_MOUSE]             | 31.55 | 1 | 16 | 16 | 44  | 0.780 | 0.861 | 0.811 | 0.850 | 139.03  | 31.55 | 26 | 44  | 599  | 67.3  | 8.34  |
| P62852   | 40S ribosomal protein S25 OS=Mus musculus GN=Rps25 PE=2 SV=1 - [RS25_MOUSE]                               | 34.40 | 1 | 6  | 6  | 29  | 0.547 | 0.797 | 0.790 | 0.850 | 66.78   | 34.40 | 11 | 29  | 125  | 13.7  | 10.11 |
| Q8CHR9-2 | Isoform 2 of Pih1 domain-containing protein 2 OS=Mus musculus GN=Pih1d2 - [PIHD2_MOUSE]                   | 13.16 | 5 | 1  | 1  | 1   | 0.914 | 1.003 | 1.041 | 0.850 | 0.00    | 13.16 | 1  | 1   | 114  | 13.1  | 9.22  |
| Q9DBF7   | Pre-mRNA-splicing factor CWC25 homolog OS=Mus musculus GN=Cwc25 PE=2 SV=2 - [CWC25_MOUSE]                 | 13.46 | 4 | 4  | 4  | 5   | 1.108 | 1.033 | 0.974 | 0.851 | 6.87    | 13.46 | 5  | 5   | 416  | 48.8  | 10.23 |
| Q8BMQ2   | General transcription factor 3C polypeptide 4 OS=Mus musculus GN=Gtf3c4 PE=1 SV=2 - [TF3C4_MOUSE]         | 11.63 | 4 | 7  | 7  | 13  | 1.023 | 0.909 | 0.764 | 0.851 | 42.42   | 11.63 | 10 | 13  | 817  | 91.6  | 6.73  |
| Q8BZJ8-3 | Isoform 3 of Uncharacterized protein C8orf34 homolog OS=Mus musculus -                                    | 7.93  | 5 | 1  | 1  | 1   | 1.814 | 1.064 | 0.798 | 0.851 | 3.23    | 7.93  | 1  | 1   | 227  | 25.6  | 8.76  |
| Q8BR75   | Serine/Arginine-related protein 53 OS=Mus musculus GN=Rsrc1 PE=2 SV=1 - [Q8BR75_MOUSE]                    | 8.45  | 4 | 2  | 2  | 6   | 0.925 | 0.668 | 0.920 | 0.851 | 12.86   | 8.45  | 3  | 6   | 213  | 24.8  | 11.31 |
| E2QRQ3   | Double-stranded RNA-binding protein Staufen homolog 2 OS=Mus musculus GN=Stau2 PE=2 SV=1 - [E2QRQ3_MOUSE] | 30.02 | 8 | 10 | 13 | 34  | 0.819 | 0.540 | 0.929 | 0.851 | 96.25   | 30.02 | 23 | 34  | 473  | 52.0  | 9.67  |
| P97379   | Ras GTPase-activating protein-binding protein 2 OS=Mus musculus GN=G3bp2 PE=1 SV=2 - [G3BP2_MOUSE]        | 41.08 | 1 | 3  | 17 | 261 | 1.256 | 0.826 | 1.003 | 0.851 | 771.05  | 41.08 | 31 | 261 | 482  | 54.1  | 5.62  |
| Q60809   | CCR4-NOT transcription complex subunit 7 OS=Mus musculus GN=Cnot7 PE=1 SV=1 - [CNOT7_MOUSE]               | 11.93 | 1 | 2  | 2  | 11  | 0.660 | 1.413 | 0.864 | 0.851 | 42.15   | 11.93 | 3  | 11  | 285  | 32.7  | 4.84  |
| Q61025-2 | Isoform 2 of Intraflagellar transport protein 20 homolog OS=Mus musculus GN=Ifit20 - [IFT20_MOUSE]        | 40.57 | 2 | 3  | 3  | 12  | 1.359 | 1.049 | 0.973 | 0.851 | 40.63   | 40.57 | 6  | 12  | 106  | 12.0  | 5.60  |
| Q920P3   | Deleted in bladder cancer protein 1 homolog OS=Mus musculus GN=Dblc1 PE=2 SV=1 - [DBCL1_MOUSE]            | 12.50 | 2 | 8  | 9  | 28  | 0.409 | 1.193 | 1.072 | 0.851 | 91.53   | 12.50 | 15 | 28  | 760  | 88.6  | 8.97  |
| O88909   | Solute carrier family 22 member 8 OS=Mus musculus GN=Slc22a8 PE=2 SV=2 -                                  | 3.72  | 1 | 2  | 2  | 4   | 0.996 | 3.248 | 0.718 | 0.851 | 13.04   | 3.72  | 4  | 4   | 537  | 59.2  | 8.40  |
| P97927   | Laminin subunit alpha-4 OS=Mus musculus GN=Lama4 PE=1 SV=2 - [LAMA4_MOUSE]                                | 11.56 | 7 | 19 | 20 | 53  | 1.077 | 1.006 | 0.859 | 0.851 | 157.70  | 11.56 | 31 | 53  | 1816 | 201.7 | 6.21  |
| Q8BT14-2 | Isoform 2 of CCR4-NOT transcription complex subunit 4 OS=Mus musculus GN=Cnot4 - [CNOT4_MOUSE]            | 16.08 | 4 | 6  | 6  | 35  | 1.251 | 0.885 | 0.961 | 0.851 | 72.30   | 16.08 | 11 | 35  | 572  | 63.0  | 7.03  |
| P41105   | 60S ribosomal protein L28 OS=Mus musculus GN=Rpl28 PE=1 SV=2 - [RL28_MOUSE]                               | 56.93 | 2 | 11 | 11 | 103 | 0.458 | 0.454 | 0.686 | 0.851 | 272.00  | 56.93 | 19 | 103 | 137  | 15.7  | 12.02 |
| Q8BIQ5   | Cleavage stimulation factor subunit 2 OS=Mus musculus GN=Cstf2 PE=1 SV=2 - [CSTF2_MOUSE]                  | 28.62 | 4 | 7  | 14 | 48  | 1.937 | 0.896 | 0.915 | 0.851 | 126.01  | 28.62 | 24 | 48  | 580  | 61.3  | 6.83  |
| P62309   | Small nuclear ribonucleoprotein G OS=Mus musculus GN=Snrgp PE=1 SV=1 -                                    | 34.21 | 1 | 3  | 3  | 12  | 1.295 | 0.800 | 0.815 | 0.852 | 30.14   | 34.21 | 5  | 12  | 76   | 8.5   | 8.88  |
| P31786   | Acyl-CoA-binding protein OS=Mus musculus GN=Dbi PE=1 SV=2 - [ACBP_MOUSE]                                  | 65.52 | 5 | 9  | 9  | 379 | 1.908 | 0.776 | 0.947 | 0.852 | 1394.29 | 65.52 | 12 | 379 | 87   | 10.0  | 8.82  |
| F6RND9   | Myosin phosphatase Rho-interacting protein (Fragment) OS=Mus musculus GN=Mrip PE=2 SV=1 - [F6RND9_MOUSE]  | 44.46 | 8 | 3  | 36 | 83  | 0.942 | 1.060 | 1.064 | 0.852 | 238.68  | 44.46 | 59 | 83  | 1010 | 114.0 | 6.51  |
| Q8CFQ9   | Fusion, derived from (L216) malignant liposarcoma (Human) OS=Mus musculus GN=Fus PE=2 SV=1 - [FUS_MOUSE]  | 29.01 | 5 | 10 | 14 | 134 | 1.245 | 0.737 | 1.196 | 0.852 | 362.60  | 29.01 | 24 | 134 | 517  | 52.6  | 9.36  |
| P07742   | Ribonucleoside-diphosphate reductase large subunit OS=Mus musculus GN=Rrm1 PE=1 SV=2 - [RIR1_MOUSE]       | 11.24 | 1 | 7  | 7  | 14  | 1.068 | 0.704 | 0.633 | 0.852 | 30.51   | 11.24 | 11 | 14  | 792  | 90.2  | 6.70  |
| Q3V4B5   | COMM domain-containing protein 6 OS=Mus musculus GN=Comm6 PE=2 SV=1 -                                     | 74.71 | 2 | 6  | 6  | 16  | 1.091 | 1.145 | 0.886 | 0.852 | 37.22   | 74.71 | 9  | 16  | 87   | 9.8   | 5.38  |

|          |                                                                                                                                                        |       |    |    |    |     |       |       |       |       |        |       |    |     |      |       |       |
|----------|--------------------------------------------------------------------------------------------------------------------------------------------------------|-------|----|----|----|-----|-------|-------|-------|-------|--------|-------|----|-----|------|-------|-------|
| Q9CXW4   | 60S ribosomal protein L11<br>OS=Mus musculus<br>GN=Rpl11 PE=1 SV=4 -<br>[RL11_MOUSE]                                                                   | 47.75 | 6  | 10 | 10 | 33  | 0.625 | 0.669 | 0.757 | 0.852 | 103.94 | 47.75 | 18 | 33  | 178  | 20.2  | 9.60  |
| P60670   | Nuclear protein localization<br>protein 4 homolog<br>OS=Mus musculus<br>GN=Nploc4 PE=1 SV=3 -<br>[NPL4_MOUSE]                                          | 49.51 | 2  | 26 | 26 | 68  | 0.823 | 0.818 | 0.833 | 0.852 | 188.41 | 49.51 | 45 | 68  | 608  | 68.0  | 6.46  |
| Q3UUQ7   | GPI inositol-deacylase<br>OS=Mus musculus<br>GN=Pgap1 PE=1 SV=3 -<br>[PGAP1_MOUSE]                                                                     | 9.22  | 1  | 10 | 10 | 29  | 0.513 | 0.619 | 0.606 | 0.852 | 70.02  | 9.22  | 18 | 29  | 922  | 104.5 | 8.91  |
| Q8C9H6-3 | Isoform 3 of Striatin-<br>interacting proteins 2<br>OS=Mus musculus<br>GN=Strip2 -                                                                     | 10.78 | 5  | 7  | 9  | 19  | 0.716 | 0.955 | 1.585 | 0.852 | 49.31  | 10.78 | 12 | 19  | 816  | 93.0  | 5.45  |
| F6RPJ9   | Insulin-degrading enzyme<br>(Fragment) OS=Mus<br>musculus GN=Ide PE=3<br>SV=1 - [F6RPJ9_MOUSE]                                                         | 33.94 | 2  | 35 | 35 | 113 | 1.544 | 0.785 | 0.801 | 0.852 | 296.63 | 33.94 | 62 | 113 | 987  | 114.2 | 6.27  |
| E9Q5D5   | WW domain-containing<br>adapter protein with coiled<br>coil OS=Mus musculus<br>GN=Wac PE=2 SV=1 -<br>[E9Q5D5_MOUSE]                                    | 15.75 | 12 | 3  | 5  | 12  | 1.648 | 1.044 | 0.931 | 0.852 | 31.18  | 15.75 | 9  | 12  | 597  | 65.0  | 9.35  |
| Q9JJU8   | SH3 domain-binding<br>glutamic acid-rich-like<br>protein OS=Mus musculus<br>GN=Sh3bgr1 PE=3 SV=1 -<br>[SH3L1_MOUSE]                                    | 75.44 | 1  | 7  | 7  | 110 | 1.671 | 1.351 | 1.176 | 0.852 | 298.76 | 75.44 | 14 | 110 | 114  | 12.8  | 4.92  |
| Q91ZS8-5 | Isoform 5 of Double-<br>stranded RNA-specific<br>editase 1 OS=Mus<br>musculus GN=Adarb1 -<br>[RED1_MOUSE]                                              | 26.14 | 5  | 11 | 12 | 25  | 0.785 | 0.531 | 0.787 | 0.852 | 91.13  | 26.14 | 19 | 25  | 677  | 74.1  | 9.35  |
| Q8CG46-2 | Isoform 2 of Structural<br>maintenance of<br>chromosomes protein 5<br>OS=Mus musculus<br>GN=Smc5 -<br>[SMC5_MOUSE]                                     | 4.32  | 2  | 3  | 3  | 5   | 1.491 | 1.276 | 0.862 | 0.853 | 10.33  | 4.32  | 4  | 5   | 1087 | 127.3 | 8.56  |
| P16675   | Lysosomal protective<br>protein OS=Mus musculus<br>GN=Ctsa PE=1 SV=1 -<br>[PPGB_MOUSE]                                                                 | 13.71 | 2  | 5  | 5  | 14  | 1.024 | 0.907 | 0.800 | 0.853 | 30.81  | 13.71 | 8  | 14  | 474  | 53.8  | 5.86  |
| Q8CIG8   | Protein arginine N-<br>methyltransferase 5<br>OS=Mus musculus<br>GN=Prrnt5 PE=1 SV=3 -<br>[ANM5_MOUSE]                                                 | 30.30 | 2  | 18 | 19 | 58  | 0.711 | 0.787 | 0.710 | 0.853 | 167.10 | 30.30 | 34 | 58  | 637  | 72.6  | 6.42  |
| F6QL70   | Protein Gm17669 OS=Mus<br>musculus GN=Gm17669<br>PE=4 SV=1 -<br>[F6QL70_MOUSE]                                                                         | 33.77 | 6  | 7  | 7  | 22  | 0.524 | 0.899 | 0.739 | 0.853 | 43.86  | 33.77 | 11 | 22  | 154  | 17.0  | 11.84 |
| Q9D864   | Actin-related protein 6<br>OS=Mus musculus<br>GN=Actr6 PE=2 SV=2 -<br>[ARP6_MOUSE]                                                                     | 14.65 | 1  | 3  | 3  | 3   | 2.458 | 0.873 | 0.993 | 0.853 | 5.40   | 14.65 | 3  | 3   | 396  | 45.8  | 5.03  |
| A2ALB1   | RNA exonuclease 4<br>(Fragment) OS=Mus<br>musculus GN=Rexo4 PE=2<br>SV=1 - [A2ALB1_MOUSE]                                                              | 5.23  | 3  | 2  | 2  | 7   | 1.502 | 1.104 | 1.024 | 0.853 | 18.00  | 5.23  | 3  | 7   | 363  | 40.1  | 9.80  |
| Q80SY4   | E3 ubiquitin-protein ligase<br>MIB1 OS=Mus musculus<br>GN=Mib1 PE=1 SV=1 -<br>[MIB1_MOUSE]                                                             | 9.74  | 3  | 7  | 8  | 18  | 0.841 | 0.883 | 0.987 | 0.853 | 45.77  | 9.74  | 13 | 18  | 1006 | 110.0 | 6.92  |
| P70662-2 | Isoform 2 of LIM domain-<br>binding protein 1 OS=Mus<br>musculus GN=Ldb1 -<br>[LDB1_MOUSE]                                                             | 7.52  | 4  | 1  | 2  | 3   | 0.878 | 0.719 | 0.944 | 0.853 | 9.36   | 7.52  | 3  | 3   | 319  | 36.6  | 8.63  |
| Q6P5D8   | Structural maintenance of<br>chromosomes flexible<br>hinge domain-containing<br>protein 1 OS=Mus<br>musculus GN=Smchd1<br>PE=1 SV=2 -<br>[SMHD1_MOUSE] | 15.60 | 1  | 28 | 28 | 46  | 0.853 | 0.990 | 0.844 | 0.853 | 121.20 | 15.60 | 41 | 46  | 2007 | 225.5 | 7.24  |
| Q8VEA4   | Mitochondrial<br>intermembrane space<br>import and assembly<br>protein 40 OS=Mus<br>musculus GN=Chchd4<br>PE=1 SV=1 -<br>[CHCHD4_MOUSE]                | 16.55 | 1  | 3  | 3  | 19  | 1.844 | 0.988 | 1.209 | 0.854 | 53.35  | 16.55 | 5  | 19  | 139  | 15.5  | 4.32  |
| P11438   | Lysosome-associated<br>membrane glycoprotein 1<br>OS=Mus musculus<br>GN=Lamp1 PE=1 SV=2 -<br>[LAMP1_MOUSE]                                             | 8.37  | 1  | 3  | 3  | 29  | 1.290 | 0.818 | 0.818 | 0.854 | 85.55  | 8.37  | 6  | 29  | 406  | 43.8  | 8.40  |
| Q3UFQ8   | Leucine-rich repeat-<br>containing protein 16B<br>OS=Mus musculus<br>GN=Lrrc16b PE=2 SV=2 -<br>[LR16B_MOUSE]                                           | 15.71 | 1  | 16 | 16 | 36  | 0.799 | 0.579 | 0.761 | 0.854 | 90.61  | 15.71 | 26 | 36  | 1375 | 150.3 | 7.72  |
| Q9CR00   | 26S proteasome non-<br>ATPase regulatory subunit<br>9 OS=Mus musculus<br>GN=Psm9 PE=1 SV=1 -<br>[PSMD9_MOUSE]                                          | 27.48 | 1  | 5  | 5  | 58  | 2.127 | 0.855 | 1.124 | 0.854 | 202.37 | 27.48 | 10 | 58  | 222  | 24.7  | 6.43  |
| Q3UHD1   | Brain-specific angiogenesis<br>inhibitor 1 OS=Mus<br>musculus GN=Bai1 PE=1<br>SV=1 - [BAI1_MOUSE]                                                      | 15.23 | 2  | 24 | 25 | 89  | 0.775 | 1.024 | 1.192 | 0.854 | 254.36 | 15.23 | 43 | 89  | 1582 | 173.2 | 7.56  |
| Q61191   | Host cell factor 1 OS=Mus<br>musculus GN=Hcf1 PE=1<br>SV=2 - [HCFC1_MOUSE]                                                                             | 24.21 | 5  | 35 | 35 | 133 | 1.126 | 0.968 | 0.965 | 0.854 | 343.27 | 24.21 | 60 | 133 | 2045 | 210.3 | 7.18  |

|          |                                                                                                                            |       |    |    |    |      |       |       |       |       |         |       |    |      |      |       |       |
|----------|----------------------------------------------------------------------------------------------------------------------------|-------|----|----|----|------|-------|-------|-------|-------|---------|-------|----|------|------|-------|-------|
| Q8BIZ1-2 | Isoform 2 of Ankyrin repeat and sterile alpha motif domain-containing protein 1B OS=Mus musculus GN=Anks1b - [ANS1B_MOUSE] | 38.50 | 4  | 1  | 15 | 53   | 0.988 | 3.568 | 1.910 | 0.854 | 149.99  | 38.50 | 28 | 53   | 426  | 48.3  | 7.97  |
| Q8R555   | Cartilage acidic protein 1 OS=Mus musculus GN=Crtac1 PE=2 SV=1 - [CRAC1_MOUSE]                                             | 31.11 | 1  | 15 | 15 | 53   | 0.844 | 1.355 | 0.935 | 0.854 | 163.89  | 31.11 | 25 | 53   | 646  | 70.3  | 5.14  |
| P20060   | Beta-hexosaminidase subunit beta OS=Mus musculus GN=Hexb PE=2 SV=2 - [HEXB_MOUSE]                                          | 23.88 | 1  | 14 | 14 | 55   | 0.630 | 1.041 | 0.960 | 0.854 | 137.60  | 23.88 | 27 | 55   | 536  | 61.1  | 8.12  |
| Q99K28   | ADP-ribosylation factor GTPase-activating protein 2 OS=Mus musculus GN=Arfgap2 PE=1 SV=1 - [ARFG2_MOUSE]                   | 25.38 | 2  | 14 | 14 | 51   | 1.163 | 0.762 | 1.014 | 0.854 | 124.55  | 25.38 | 23 | 51   | 520  | 56.6  | 8.18  |
| Q9DBG7   | Signal recognition particle receptor subunit alpha OS=Mus musculus GN=Srpr PE=1 SV=1 - [SRPR_MOUSE]                        | 27.36 | 2  | 17 | 17 | 44   | 0.632 | 0.755 | 0.724 | 0.854 | 104.79  | 27.36 | 31 | 44   | 636  | 69.6  | 8.95  |
| P61924   | Coatamer subunit zeta-1 OS=Mus musculus GN=Copz1 PE=2 SV=1 - [COPZ1_MOUSE]                                                 | 41.24 | 1  | 4  | 4  | 24   | 0.901 | 1.059 | 0.856 | 0.854 | 84.36   | 41.24 | 8  | 24   | 177  | 20.2  | 4.81  |
| Q9CR57   | 60S ribosomal protein L14 OS=Mus musculus GN=Rpl14 PE=2 SV=3 - [RL14_MOUSE]                                                | 42.40 | 1  | 9  | 10 | 73   | 0.543 | 0.737 | 0.739 | 0.854 | 196.26  | 42.40 | 16 | 73   | 217  | 23.5  | 11.02 |
| Q9QZR9   | Collagen alpha-4(IV) chain OS=Mus musculus GN=Col4a4 PE=2 SV=1 - [CO4A4_MOUSE]                                             | 2.73  | 1  | 2  | 2  | 2    | 1.446 | 0.685 | 1.022 | 0.854 | 2.99    | 2.73  | 2  | 2    | 1682 | 164.0 | 8.54  |
| Q8R033   | LYR motif-containing protein 2 OS=Mus musculus GN=Lymr2 PE=2 SV=1 - [LYRM2_MOUSE]                                          | 7.95  | 1  | 1  | 1  | 1    | 3.953 | 1.077 | 0.988 | 0.854 | 1.85    | 7.95  | 1  | 1    | 88   | 10.4  | 10.40 |
| Q69AB2   | Thioredoxin domain-containing protein 8 OS=Mus musculus GN=Txndc8 PE=1 SV=1 - [TXND8_MOUSE]                                | 18.90 | 2  | 2  | 2  | 2    | 5.843 | 1.097 | 1.036 | 0.854 | 5.51    | 18.90 | 2  | 2    | 127  | 14.5  | 8.98  |
| Q9WU56-2 | Isoform 2 of tRNA pseudouridine synthase A, mitochondrial OS=Mus musculus GN=Pus1 - [TRUA_MOUSE]                           | 15.27 | 7  | 5  | 5  | 8    | 1.408 | 0.954 | 1.083 | 0.855 | 25.14   | 15.27 | 7  | 8    | 393  | 44.1  | 8.21  |
| Q61187   | Tumor susceptibility gene 101 protein OS=Mus musculus GN=Tsg101 PE=1 SV=2 - [TS101_MOUSE]                                  | 31.71 | 3  | 11 | 12 | 42   | 0.691 | 0.854 | 0.925 | 0.855 | 105.71  | 31.71 | 18 | 42   | 391  | 44.1  | 6.71  |
| P11499   | Heat shock protein HSP 90-beta OS=Mus musculus GN=Hsp90ab1 PE=1 SV=3 - [HS90B_MOUSE]                                       | 57.32 | 5  | 30 | 48 | 1131 | 0.732 | 0.934 | 0.778 | 0.855 | 3441.33 | 57.32 | 90 | 1131 | 724  | 83.2  | 5.03  |
| G3X9V2   | Catenin (Cadherin associated protein), delta 1, isoform CRA_a OS=Mus musculus GN=Ctnd1 PE=4 SV=1 - [CTND1_MOUSE]           | 39.38 | 19 | 29 | 29 | 117  | 0.861 | 1.056 | 0.879 | 0.855 | 343.66  | 39.38 | 53 | 117  | 932  | 104.0 | 6.95  |
| Q9WTL8-2 | Isoform 2 of Aryl hydrocarbon receptor nuclear translocator-like protein 1 OS=Mus musculus GN=Arnt1 - [ARNT1_MOUSE]        | 7.68  | 5  | 3  | 3  | 7    | 0.743 | 1.051 | 0.973 | 0.855 | 25.55   | 7.68  | 5  | 7    | 625  | 68.6  | 6.86  |
| Q8CH09   | SURP and G-patch domain-containing protein 2 OS=Mus musculus GN=Supp2 PE=2 SV=2 - [SUGP2_MOUSE]                            | 22.21 | 4  | 20 | 20 | 87   | 0.536 | 0.629 | 0.804 | 0.855 | 250.00  | 22.21 | 36 | 87   | 1067 | 118.0 | 8.31  |
| Q812E0   | Cytoplasmic polyadenylation element-binding protein 2 OS=Mus musculus GN=Cpeb2 PE=1 SV=1 - [CPEB2_MOUSE]                   | 31.86 | 3  | 1  | 10 | 55   | 0.959 | 0.828 | 0.754 | 0.855 | 141.12  | 31.86 | 18 | 55   | 521  | 58.4  | 7.50  |
| Q8BKX1-3 | Isoform 3 of Brain-specific angiogenesis inhibitor 1-associated protein 2 OS=Mus musculus GN=Baiap2 - [BAIAP2_MOUSE]       | 70.18 | 4  | 2  | 31 | 244  | 0.763 | 1.911 | 2.071 | 0.855 | 766.03  | 70.18 | 53 | 244  | 513  | 56.8  | 8.97  |
| P50586-2 | Isoform Short of Tubby protein OS=Mus musculus GN=Tub - [TUB_MOUSE]                                                        | 18.49 | 2  | 6  | 7  | 16   | 0.977 | 0.752 | 0.851 | 0.855 | 43.08   | 18.49 | 11 | 16   | 449  | 49.5  | 9.41  |
| P06797   | Cathepsin L1 OS=Mus musculus GN=Ctsl1 PE=1 SV=2 - [CATL1_MOUSE]                                                            | 14.37 | 2  | 5  | 5  | 32   | 1.894 | 0.855 | 1.242 | 0.855 | 86.78   | 14.37 | 10 | 32   | 334  | 37.5  | 6.83  |
| Q9R117   | Non-receptor tyrosine-protein kinase TYK2 OS=Mus musculus GN=Tyk2 PE=1 SV=2 - [TYK2_MOUSE]                                 | 2.46  | 3  | 1  | 3  | 5    | 7.368 | 1.551 | 0.774 | 0.855 | 8.55    | 2.46  | 5  | 5    | 1180 | 132.8 | 7.12  |
| Q99N96   | 39S ribosomal protein L1, mitochondrial OS=Mus musculus GN=Mrlp1 PE=1 SV=2 - [RM01_MOUSE]                                  | 26.49 | 3  | 6  | 8  | 18   | 0.749 | 0.801 | 0.794 | 0.855 | 47.06   | 26.49 | 11 | 18   | 336  | 37.6  | 8.72  |
| Q6NZQ4   | PAX-interacting protein 1 OS=Mus musculus GN=Paxip1 PE=1 SV=1 - [PAXI1_MOUSE]                                              | 3.41  | 1  | 2  | 2  | 2    | 1.497 | 1.563 | 0.937 | 0.855 | 2.97    | 3.41  | 2  | 2    | 1056 | 119.2 | 7.20  |

|          |                                                                                                                      |       |    |    |    |     |       |       |       |       |         |       |    |     |      |       |       |
|----------|----------------------------------------------------------------------------------------------------------------------|-------|----|----|----|-----|-------|-------|-------|-------|---------|-------|----|-----|------|-------|-------|
| Q5RL20   | 39S ribosomal protein L43, mitochondrial OS=Mus musculus GN=Mp43 PE=2 SV=1 - [Q5RL20_MOUSE]                          | 37.74 | 2  | 6  | 6  | 18  | 0.826 | 1.073 | 0.774 | 0.855 | 46.34   | 37.74 | 11 | 18  | 159  | 17.9  | 10.58 |
| Q99MR6-3 | Isoform C of Ferrate RNA effector molecule homolog OS=Mus musculus GN=Srrt - [SRRT_MOUSE]                            | 21.18 | 4  | 17 | 18 | 39  | 1.176 | 0.881 | 0.957 | 0.855 | 107.90  | 21.18 | 28 | 39  | 864  | 99.4  | 5.92  |
| Q9JKF6   | Poliovirus receptor-related protein 1 OS=Mus musculus GN=Pvr11 PE=1 SV=3 - [PVR11_MOUSE]                             | 41.36 | 1  | 15 | 15 | 66  | 0.998 | 1.780 | 1.056 | 0.855 | 220.72  | 41.36 | 26 | 66  | 515  | 57.0  | 6.35  |
| AZAU91   | Tumor suppressor p53-binding protein 1 OS=Mus musculus GN=Trp53bp1 PE=2 SV=1 - [AZAU91_MOUSE]                        | 35.70 | 9  | 39 | 39 | 183 | 1.233 | 0.771 | 0.839 | 0.855 | 587.60  | 35.70 | 65 | 183 | 1969 | 212.6 | 4.63  |
| Q56A08   | G patch domain and KOW motifs-containing protein OS=Mus musculus GN=Gpkow PE=2 SV=2 - [GPKOW_MOUSE]                  | 19.26 | 2  | 9  | 9  | 27  | 1.076 | 0.795 | 0.905 | 0.855 | 63.05   | 19.26 | 15 | 27  | 488  | 53.8  | 8.07  |
| Q8BP80   | MOB kinase activator 1B OS=Mus musculus GN=Mob1b PE=1 SV=3 - [MOB1B_MOUSE]                                           | 19.91 | 4  | 4  | 4  | 15  | 0.804 | 1.579 | 0.818 | 0.855 | 28.42   | 19.91 | 7  | 15  | 216  | 25.1  | 6.73  |
| P60853   | Leucine zipper putative tumor suppressor 1 OS=Mus musculus GN=Lzts1 PE=2 SV=3 - [LZTS1_MOUSE]                        | 21.04 | 1  | 9  | 9  | 20  | 1.170 | 2.061 | 1.672 | 0.855 | 57.91   | 21.04 | 15 | 20  | 599  | 67.2  | 7.56  |
| Q92080-2 | Isoform 2 of FERM domain-containing protein 4B OS=Mus musculus GN=Frm4b - [FRM4B_MOUSE]                              | 5.30  | 4  | 3  | 4  | 9   | 1.017 | 0.462 | 0.922 | 0.855 | 23.60   | 5.30  | 6  | 9   | 981  | 111.5 | 8.51  |
| Q9D914   | TBC1 domain family member 20 OS=Mus musculus GN=Tbcl20 PE=2 SV=1 - [TBC1_MOUSE]                                      | 10.20 | 2  | 3  | 3  | 11  | 0.867 | 0.879 | 0.886 | 0.856 | 35.95   | 10.20 | 5  | 11  | 402  | 45.8  | 6.96  |
| G5E8E3   | Protein Z310022A10Rik OS=Mus musculus GN=Z310022A10Rik PE=4 SV=1 - [G5E8E3_MOUSE]                                    | 9.93  | 3  | 4  | 4  | 7   | 0.823 | 0.909 | 0.958 | 0.856 | 17.11   | 9.93  | 5  | 7   | 413  | 44.4  | 10.26 |
| Q5DTX6   | Junctional protein associated with coronary artery disease OS=Mus musculus GN=Jcad PE=1 SV=2 - [JCAD_MOUSE]          | 29.62 | 1  | 27 | 27 | 74  | 1.207 | 1.072 | 2.001 | 0.856 | 220.51  | 29.62 | 49 | 74  | 1320 | 144.7 | 6.52  |
| O88522   | NF-kappa-B essential modulator OS=Mus musculus GN=Nbkkg PE=1 SV=2 - [NEMO_MOUSE]                                     | 25.00 | 11 | 9  | 10 | 43  | 1.623 | 1.104 | 1.237 | 0.856 | 137.12  | 25.00 | 19 | 43  | 412  | 47.9  | 5.85  |
| Q05C51   | Ribonuclease OS=Mus musculus GN=Rnaseh2a PE=2 SV=1 - [Q05C51_MOUSE]                                                  | 18.11 | 4  | 4  | 4  | 13  | 1.257 | 1.128 | 0.948 | 0.856 | 34.80   | 18.11 | 5  | 13  | 254  | 28.1  | 5.07  |
| Q8K004   | Protein Spata2 OS=Mus musculus GN=Spata2 PE=2 SV=1 - [Q8K004_MOUSE]                                                  | 11.07 | 2  | 5  | 5  | 11  | 1.026 | 1.404 | 1.216 | 0.856 | 31.18   | 11.07 | 8  | 11  | 515  | 57.8  | 8.63  |
| Q8VDR9   | Dedicator of cytokinesis protein 6 OS=Mus musculus GN=Dock6 PE=1 SV=4 - [DOCK6_MOUSE]                                | 4.04  | 4  | 5  | 9  | 17  | 0.807 | 0.914 | 0.731 | 0.856 | 38.87   | 4.04  | 14 | 17  | 2080 | 233.1 | 6.80  |
| P43407   | Syndecan-2 OS=Mus musculus GN=Sdc2 PE=1 SV=1 - [SDC2_MOUSE]                                                          | 4.46  | 1  | 1  | 1  | 1   | 0.439 | 1.010 | 0.688 | 0.856 | 0.00    | 4.46  | 1  | 1   | 202  | 22.1  | 4.58  |
| P31324   | cAMP-dependent protein kinase type II-beta regulatory subunit OS=Mus musculus GN=Prkar2b PE=1 SV=3 - [PRKAR2B_MOUSE] | 46.63 | 2  | 12 | 18 | 108 | 0.509 | 1.299 | 0.993 | 0.856 | 362.46  | 46.63 | 32 | 108 | 416  | 46.1  | 4.98  |
| G5E829   | MCG13663, isoform CRA_a OS=Mus musculus GN=Atg2b1 PE=3 SV=1 - [G5E829_MOUSE]                                         | 35.25 | 1  | 20 | 44 | 430 | 0.507 | 0.951 | 1.308 | 0.856 | 1234.61 | 35.25 | 80 | 430 | 1220 | 134.7 | 5.91  |
| Q3UVK2   | Protein Zfp940 OS=Mus musculus GN=Zfp940 PE=2 SV=1 - [Q3UVK2_MOUSE]                                                  | 25.78 | 1  | 2  | 2  | 2   | 1.333 | 1.490 | 1.058 | 0.856 | 2.95    | 25.78 | 2  | 2   | 128  | 14.3  | 5.08  |
| Q3TUA9   | Probable inactive protein kinase-like protein Sgk196 OS=Mus musculus GN=Sgk196 PE=2 SV=2 - [SG196_MOUSE]             | 9.46  | 1  | 3  | 3  | 5   | 1.094 | 1.052 | 0.906 | 0.856 | 13.55   | 9.46  | 5  | 5   | 349  | 39.9  | 6.62  |
| Q80T11   | Pleckstrin homology domain-containing family H member 1 OS=Mus musculus GN=Plekhh1 PE=2 SV=2 - [PLEKHH1_MOUSE]       | 6.27  | 2  | 6  | 7  | 10  | 1.087 | 0.844 | 1.004 | 0.856 | 20.27   | 6.27  | 9  | 10  | 1356 | 150.8 | 7.59  |
| Q00493   | Carboxypeptidase E OS=Mus musculus GN=Cpe PE=1 SV=2 - [CBPE_MOUSE]                                                   | 62.61 | 1  | 26 | 26 | 173 | 0.749 | 1.090 | 0.721 | 0.856 | 511.52  | 62.61 | 45 | 173 | 476  | 53.2  | 5.19  |
| Q3TRP8   | Cartilage acidic protein 1 OS=Mus musculus GN=Cep68 PE=2 SV=1 - [Q3TRP8_MOUSE]                                       | 12.01 | 3  | 3  | 4  | 10  | 1.325 | 1.778 | 0.861 | 0.856 | 23.86   | 12.01 | 7  | 10  | 633  | 67.7  | 5.94  |
| O88708   | Origin recognition complex subunit 4 OS=Mus musculus GN=Orc4 PE=1 SV=2 - [ORC4_MOUSE]                                | 4.85  | 1  | 2  | 2  | 3   | 3.018 | 1.220 | 1.305 | 0.856 | 5.67    | 4.85  | 2  | 3   | 433  | 49.9  | 7.15  |
| B2RRE7   | OTU domain-containing protein 4 OS=Mus musculus GN=Otud4 PE=1 SV=1 - [OTUD4_MOUSE]                                   | 4.61  | 1  | 3  | 3  | 5   | 1.269 | 0.800 | 1.161 | 0.856 | 13.13   | 4.61  | 4  | 5   | 1107 | 123.0 | 6.76  |



|          |                                                                                                           |       |    |    |    |     |       |       |       |       |        |       |    |     |      |       |      |
|----------|-----------------------------------------------------------------------------------------------------------|-------|----|----|----|-----|-------|-------|-------|-------|--------|-------|----|-----|------|-------|------|
| Q9CWZ3-2 | Isoform 2 of RNA-binding protein 8A OS=Mus musculus GN=Rbm8a - [RBM8A_MOUSE]                              | 15.61 | 2  | 3  | 3  | 9   | 0.959 | 1.016 | 0.887 | 0.856 | 23.47  | 15.61 | 5  | 9   | 173  | 19.7  | 5.92 |
| E9Q4V5   | Protein Gm4301 OS=Mus musculus GN=Gm4301 PE=4 SV=1 - [E9Q4V5_MOUSE]                                       | 9.00  | 13 | 1  | 3  | 4   | 1.274 | 3.385 | 0.677 | 0.856 | 6.87   | 9.00  | 3  | 4   | 289  | 33.0  | 9.79 |
| Q91WK1   | SPRY domain-containing protein 4 OS=Mus musculus GN=Spryd4 PE=2 SV=1 -                                    | 43.00 | 1  | 7  | 7  | 19  | 0.859 | 0.638 | 0.816 | 0.856 | 61.30  | 43.00 | 11 | 19  | 207  | 23.3  | 9.45 |
| D3Z723   | Nuclear transcription factor Y subunit beta (Fragment) OS=Mus musculus GN=Niyb PE=2 SV=1 - [D3Z723_MOUSE] | 19.81 | 2  | 2  | 2  | 8   | 1.197 | 1.154 | 0.856 | 0.857 | 22.12  | 19.81 | 4  | 8   | 106  | 11.7  | 4.58 |
| Q9D4H9-3 | Isoform 3 of PHD finger protein 14 OS=Mus musculus GN=Pfh14 - [PHF14_MOUSE]                               | 3.76  | 5  | 3  | 4  | 4   | 0.872 | 0.810 | 1.018 | 0.857 | 4.99   | 3.76  | 4  | 4   | 878  | 98.7  | 5.34 |
| Q6P9Q6   | FK506-binding protein 15 OS=Mus musculus GN=Fkbp15 PE=1 SV=2 - [FKB15_MOUSE]                              | 22.20 | 6  | 19 | 20 | 94  | 1.442 | 0.919 | 1.063 | 0.857 | 243.69 | 22.20 | 36 | 94  | 1216 | 132.9 | 5.07 |
| A2AV25   | Fibrinogen C domain-containing protein 1 OS=Mus musculus GN=Fbcd1 PE=2 SV=1 - [FBCD1_MOUSE]               | 2.61  | 1  | 1  | 1  | 2   | 0.545 | 1.013 | 0.635 | 0.857 | 7.54   | 2.61  | 2  | 2   | 459  | 50.6  | 6.67 |
| O70472   | Transmembrane protein 131 OS=Mus musculus GN=Tmem131 PE=1 SV=2 - [TM131_MOUSE]                            | 2.45  | 1  | 3  | 3  | 3   | 0.904 | 0.673 | 0.843 | 0.857 | 7.23   | 2.45  | 3  | 3   | 1877 | 204.5 | 8.54 |
| E9Q066   | La-related protein 4 OS=Mus musculus GN=Larp4 PE=2 SV=1 - [E9Q066_MOUSE]                                  | 19.92 | 3  | 11 | 11 | 39  | 1.501 | 0.784 | 1.030 | 0.857 | 80.93  | 19.92 | 15 | 39  | 718  | 79.6  | 6.51 |
| Q05A62-2 | Isoform 2 of Dynein light chain 1, axonemal OS=Mus musculus GN=Onal1 -                                    | 50.57 | 6  | 8  | 8  | 19  | 1.064 | 2.545 | 0.828 | 0.857 | 51.89  | 50.57 | 14 | 19  | 176  | 19.9  | 5.49 |
| AZALL4   | Protein Shroom2 OS=Mus musculus GN=Shroom2 PE=1 SV=1 - [SHRM2_MOUSE]                                      | 29.24 | 5  | 33 | 35 | 111 | 1.638 | 0.939 | 1.254 | 0.857 | 318.02 | 29.24 | 53 | 111 | 1481 | 164.6 | 6.70 |
| Q8BFW7   | Lipoma-preferred partner homolog OS=Mus musculus GN=Lpp PE=1 SV=1 - [LPP_MOUSE]                           | 32.63 | 5  | 14 | 14 | 94  | 1.377 | 1.991 | 0.969 | 0.857 | 272.59 | 32.63 | 25 | 94  | 613  | 65.8  | 7.37 |
| P70698   | CTP synthase 1 OS=Mus musculus GN=Ctps1 PE=1 SV=2 - [PYRG1_MOUSE]                                         | 25.04 | 1  | 12 | 14 | 36  | 0.693 | 0.739 | 0.717 | 0.857 | 97.42  | 25.04 | 25 | 36  | 591  | 66.6  | 6.58 |
| Q9CQE9   | FLYWCH family member 2 OS=Mus musculus GN=Flywch2 PE=2 SV=1 - [FWCH2_MOUSE]                               | 53.24 | 3  | 4  | 4  | 9   | 1.265 | 0.409 | 0.824 | 0.857 | 22.68  | 53.24 | 6  | 9   | 139  | 14.4  | 8.13 |
| Q1RL13   | Copine-9 OS=Mus musculus GN=Cpne9 PE=2 SV=1 - [CPNE9_MOUSE]                                               | 37.43 | 1  | 9  | 15 | 100 | 0.357 | 0.215 | 0.557 | 0.857 | 279.29 | 37.43 | 29 | 100 | 553  | 61.8  | 5.40 |
| Q9J1F7   | Coatomer subunit beta OS=Mus musculus GN=Copb1 PE=1 SV=1 - [COPB_MOUSE]                                   | 35.26 | 1  | 28 | 28 | 111 | 0.597 | 0.904 | 0.719 | 0.858 | 339.84 | 35.26 | 49 | 111 | 953  | 107.0 | 6.00 |
| E9Q394   | Protein Akap13 OS=Mus musculus GN=Akap13 PE=2 SV=1 - [E9Q394_MOUSE]                                       | 3.75  | 6  | 8  | 8  | 12  | 0.773 | 0.730 | 0.815 | 0.858 | 25.00  | 3.75  | 10 | 12  | 2776 | 303.8 | 5.38 |
| Q9CQE8   | UPF0568 protein C14orf166 homolog OS=Mus musculus PE=2 SV=1 - [CN166_MOUSE]                               | 58.20 | 2  | 13 | 13 | 71  | 1.280 | 0.828 | 0.831 | 0.858 | 186.97 | 58.20 | 23 | 71  | 244  | 28.1  | 6.89 |
| Q61033   | Lamina-associated polypeptide 2, isoforms alpha/zeta OS=Mus musculus GN=Tmpo PE=1 SV=4 - [LAP2A_MOUSE]    | 23.67 | 2  | 5  | 13 | 71  | 1.145 | 0.725 | 0.830 | 0.858 | 227.38 | 23.67 | 23 | 71  | 693  | 75.1  | 8.05 |
| Q8K248   | 4-hydroxyphenylpyruvate dioxygenase-like protein OS=Mus musculus GN=Hpdl PE=2 SV=1 - [HPDL_MOUSE]         | 3.23  | 1  | 1  | 1  | 2   | 1.090 | 0.811 | 1.137 | 0.858 | 2.73   | 3.23  | 2  | 2   | 371  | 39.9  | 6.84 |
| Q9CZ62   | Centrosomal protein of 97 kDa OS=Mus musculus GN=Cep97 PE=2 SV=1 - [CEP97_MOUSE]                          | 10.86 | 5  | 6  | 6  | 9   | 1.341 | 1.048 | 0.851 | 0.858 | 24.95  | 10.86 | 7  | 9   | 856  | 94.6  | 5.00 |
| Q3UZA1   | CapZ-interacting protein OS=Mus musculus GN=Rcsd1 PE=2 SV=1 - [CPZIP_MOUSE]                               | 18.20 | 2  | 4  | 4  | 14  | 1.590 | 1.143 | 1.239 | 0.858 | 45.25  | 18.20 | 6  | 14  | 412  | 44.1  | 5.16 |
| Q9Z1D1   | Eukaryotic translation initiation factor 3 subunit G OS=Mus musculus GN=EIF3g PE=1 SV=2 - [EIF3G_MOUSE]   | 31.87 | 1  | 9  | 9  | 43  | 1.119 | 0.697 | 0.920 | 0.858 | 102.20 | 31.87 | 15 | 43  | 320  | 35.6  | 5.90 |
| Q8CFI2   | Ubiquitin-conjugating enzyme E2 R1 OS=Mus musculus GN=Cdc34 PE=1 SV=1 - [UB2R1_MOUSE]                     | 9.36  | 1  | 2  | 3  | 6   | 1.239 | 0.978 | 1.070 | 0.858 | 10.28  | 9.36  | 5  | 6   | 235  | 26.6  | 4.56 |
| Q62481   | Vacuolar protein sorting-associated protein 72 homolog OS=Mus musculus GN=Vps72 PE=2 SV=2 - [VPS72_MOUSE] | 7.34  | 1  | 3  | 3  | 8   | 0.777 | 0.632 | 1.055 | 0.858 | 15.21  | 7.34  | 5  | 8   | 368  | 40.8  | 6.40 |
| Q810A7   | ATP-dependent RNA helicase DDX42 OS=Mus musculus GN=Ddx42 PE=1 SV=3 - [DDX42_MOUSE]                       | 25.30 | 2  | 17 | 18 | 64  | 0.845 | 0.824 | 1.061 | 0.858 | 201.46 | 25.30 | 30 | 64  | 929  | 101.9 | 6.98 |

|          |                                                                                                                                  |       |   |    |     |      |       |       |       |       |          |       |     |      |      |       |       |
|----------|----------------------------------------------------------------------------------------------------------------------------------|-------|---|----|-----|------|-------|-------|-------|-------|----------|-------|-----|------|------|-------|-------|
| E9QAZ2   | Ribosomal protein L15<br>OS=Mus musculus<br>GN=Gm10020 PE=3 SV=1<br>- [E9QAZ2_MOUSE]                                             | 39.71 | 4 | 8  | 8   | 58   | 0.438 | 0.592 | 0.735 | 0.859 | 182.19   | 39.71 | 15  | 58   | 204  | 24.1  | 11.58 |
| Q6P8I6   | Cytochrome c oxidase<br>assembly protein COX11,<br>mitochondrial OS=Mus<br>musculus GN=Cox11 PE=2<br>SV=1 - [COX11_MOUSE]        | 28.36 | 2 | 5  | 5   | 7    | 0.814 | 0.742 | 0.810 | 0.859 | 10.32    | 28.36 | 5   | 7    | 275  | 30.8  | 8.78  |
| Q8BIX3   | ARL14 effector protein<br>OS=Mus musculus<br>GN=Ar14ep PE=2 SV=1 -<br>[AL14E_MOUSE]                                              | 3.26  | 1 | 1  | 1   | 4    | 0.928 | 0.656 | 0.913 | 0.859 | 8.23     | 3.26  | 2   | 4    | 276  | 31.0  | 8.24  |
| Q9QXA1-2 | Isoform 2 of Cysteine and<br>histidine-rich protein 1<br>OS=Mus musculus<br>GN=Cyhr1 -                                           | 9.33  | 4 | 2  | 2   | 11   | 1.259 | 1.287 | 0.666 | 0.859 | 35.14    | 9.33  | 4   | 11   | 375  | 39.7  | 6.28  |
| O35227   | Disintegrin and<br>metalloproteinase domain-<br>containing protein 7<br>OS=Mus musculus<br>GN=Adam7 PE=2 SV=2 -<br>[ADAM7_MOUSE] | 1.90  | 1 | 1  | 1   | 6    | 1.493 | 1.277 | 1.780 | 0.859 | 0.00     | 1.90  | 1   | 6    | 789  | 89.1  | 6.38  |
| Q3UJT0   | Threonine aspartase<br>subunit beta OS=Mus<br>musculus GN=Tasp1 PE=2<br>SV=1 - [Q3UJT0_MOUSE]                                    | 4.96  | 2 | 1  | 1   | 2    | 1.109 | 0.803 | 0.930 | 0.859 | 5.34     | 4.96  | 2   | 2    | 383  | 40.2  | 7.88  |
| P51954   | Serine/threonine-protein<br>kinase Nek1 OS=Mus<br>musculus GN=Nek1 PE=1<br>SV=2 - [NEK1_MOUSE]                                   | 8.23  | 2 | 7  | 7   | 11   | 1.594 | 0.787 | 1.177 | 0.859 | 31.07    | 8.23  | 9   | 11   | 1203 | 136.6 | 5.45  |
| Q8BVA5   | UPF0554 protein Czor43<br>homolog OS=Mus<br>musculus PE=2 SV=1 -<br>[CB043_MOUSE]                                                | 14.42 | 5 | 4  | 5   | 20   | 0.639 | 0.605 | 0.924 | 0.859 | 49.55    | 14.42 | 8   | 20   | 326  | 37.3  | 8.28  |
| P61514   | 60S ribosomal protein<br>L37a OS=Mus musculus<br>GN=Rpl37a PE=2 SV=2 -<br>[RL37A_MOUSE]                                          | 30.43 | 1 | 4  | 4   | 12   | 0.559 | 0.845 | 0.851 | 0.860 | 35.62    | 30.43 | 7   | 12   | 92   | 10.3  | 10.43 |
| Q8BYB9   | Protein O-<br>glucosyltransferase 1<br>OS=Mus musculus<br>GN=Poglut1 PE=2 SV=2 -                                                 | 19.90 | 1 | 9  | 9   | 16   | 1.064 | 0.744 | 0.636 | 0.860 | 37.53    | 19.90 | 15  | 16   | 392  | 46.3  | 8.85  |
| Q8CIB9   | N-acetyltransferase ESCO2<br>OS=Mus musculus<br>GN=Esco2 PE=2 SV=3 -<br>[ESCO2_MOUSE]                                            | 1.69  | 1 | 1  | 1   | 1    | 1.356 | 1.214 | 0.683 | 0.860 | 3.18     | 1.69  | 1   | 1    | 592  | 67.2  | 9.48  |
| P97352   | Protein S100-A13 OS=Mus<br>musculus GN=S100a13<br>PE=1 SV=1 -<br>[S10AD_MOUSE]                                                   | 35.71 | 1 | 5  | 5   | 21   | 1.624 | 0.883 | 1.171 | 0.860 | 69.73    | 35.71 | 8   | 21   | 98   | 11.2  | 6.13  |
| Q91VA6   | Polymerase delta-<br>interacting protein 2<br>OS=Mus musculus<br>GN=Poldip2 PE=2 SV=1 -                                          | 13.59 | 2 | 4  | 4   | 10   | 0.933 | 0.717 | 0.965 | 0.860 | 30.86    | 13.59 | 6   | 10   | 368  | 41.8  | 8.63  |
| F6UNU0   | Rho GTPase-activating<br>protein 29 (Fragment)<br>OS=Mus musculus<br>GN=Arhgap29 PE=4 SV=1<br>- [F6UNU0_MOUSE]                   | 0.70  | 2 | 1  | 1   | 2    | 1.268 | 0.835 | 1.120 | 0.860 | 6.85     | 0.70  | 1   | 2    | 859  | 95.8  | 6.77  |
| Q5SUE8-2 | Isoform 2 of Ankyrin<br>repeat domain-containing<br>protein 40 OS=Mus<br>musculus GN=Ankr40 -<br>[ANR40_MOUSE]                   | 23.29 | 4 | 6  | 7   | 19   | 1.681 | 0.725 | 0.767 | 0.860 | 40.52    | 23.29 | 11  | 19   | 322  | 35.7  | 5.16  |
| Q8R3V5-1 | Isoform 1 of Endophilin-B2<br>OS=Mus musculus<br>GN=Sh3glb2 -<br>[SHLB2_MOUSE]                                                   | 53.67 | 2 | 1  | 19  | 119  | 1.176 | 0.923 | 0.847 | 0.860 | 351.14   | 53.67 | 35  | 119  | 395  | 44.1  | 5.99  |
| Q9QZE5   | Coatomer subunit gamma-<br>1 OS=Mus musculus<br>GN=Copg1 PE=2 SV=1 -<br>[COPG1_MOUSE]                                            | 37.53 | 2 | 20 | 23  | 83   | 0.637 | 0.995 | 0.714 | 0.860 | 264.72   | 37.53 | 41  | 83   | 874  | 97.5  | 5.35  |
| Q6PDI5   | Proteasome-associated<br>protein ECM29 homolog<br>OS=Mus musculus<br>GN=Ecm29 PE=1 SV=3 -<br>[ECM29_MOUSE]                       | 29.84 | 7 | 38 | 38  | 96   | 0.656 | 0.801 | 0.784 | 0.860 | 297.77   | 29.84 | 63  | 96   | 1840 | 203.6 | 7.06  |
| E9PWM3   | Protein Armcx4 OS=Mus<br>musculus GN=Armcx4<br>PE=2 SV=1 -<br>[E9PWM3_MOUSE]                                                     | 10.06 | 1 | 14 | 14  | 37   | 1.255 | 0.743 | 1.055 | 0.860 | 83.88    | 10.06 | 21  | 37   | 2356 | 242.8 | 4.87  |
| P53986   | Monocarboxylate<br>transporter 1 OS=Mus<br>musculus GN=Slc16a1<br>PE=1 SV=1 -                                                    | 11.76 | 1 | 4  | 4   | 16   | 0.824 | 0.603 | 0.647 | 0.860 | 46.34    | 11.76 | 7   | 16   | 493  | 53.2  | 7.47  |
| E9Q447   | Spectrin alpha chain, non-<br>erythrocytic 1 OS=Mus<br>musculus GN=Sptan1<br>PE=2 SV=1 -<br>[E9Q447_MOUSE]                       | 77.08 | 6 | 2  | 207 | 3707 | 1.174 | 0.674 | 0.725 | 0.860 | 10916.43 | 77.08 | 379 | 3707 | 2478 | 285.2 | 5.34  |
| Q9D0J8   | Parathyromosin OS=Mus<br>musculus GN=Ptms PE=2<br>SV=3 - [PTMS_MOUSE]                                                            | 10.89 | 1 | 1  | 1   | 36   | 1.323 | 1.116 | 1.422 | 0.860 | 96.83    | 10.89 | 2   | 36   | 101  | 11.4  | 4.22  |
| Q8R3D1   | TBC1 domain family<br>member 13 OS=Mus<br>musculus GN=Tbcd13<br>PE=2 SV=1 -                                                      | 17.25 | 3 | 7  | 7   | 19   | 0.584 | 1.046 | 0.669 | 0.860 | 51.32    | 17.25 | 12  | 19   | 400  | 46.4  | 5.36  |
| Q61908   | Cx9C motif-containing<br>protein 4 OS=Mus<br>musculus GN=Cmc4 PE=2<br>SV=1 - [CMC4_MOUSE]                                        | 23.53 | 1 | 2  | 2   | 3    | 1.270 | 0.816 | 1.271 | 0.860 | 7.61     | 23.53 | 3   | 3    | 68   | 7.7   | 8.38  |
| Q8VCC9   | Spondin-1 OS=Mus<br>musculus GN=Spon1 PE=2<br>SV=1 - [SPON1_MOUSE]                                                               | 20.20 | 2 | 13 | 13  | 32   | 0.796 | 1.015 | 0.844 | 0.861 | 92.70    | 20.20 | 23  | 32   | 807  | 90.8  | 6.02  |
| Q91VJ4   | Serine/threonine-protein<br>kinase 38 OS=Mus<br>musculus GN=Stk38 PE=1<br>SV=1 - [STK38_MOUSE]                                   | 16.56 | 1 | 5  | 6   | 13   | 1.373 | 0.910 | 0.854 | 0.861 | 48.08    | 16.56 | 8   | 13   | 465  | 54.1  | 7.34  |

|          |                                                                                                                             |       |   |    |    |     |       |       |       |       |        |       |    |     |      |       |       |
|----------|-----------------------------------------------------------------------------------------------------------------------------|-------|---|----|----|-----|-------|-------|-------|-------|--------|-------|----|-----|------|-------|-------|
| P47879   | Insulin-like growth factor-binding protein 4 OS=Mus musculus GN=Igfbp4 PE=2 SV=2 - [IBP4_MOUSE]                             | 14.17 | 3 | 3  | 3  | 8   | 1.869 | 0.957 | 1.176 | 0.861 | 28.87  | 14.17 | 4  | 8   | 254  | 27.8  | 7.17  |
| Q9CZ9    | ER membrane protein complex subunit 4 OS=Mus musculus GN=Emc4 PE=2 SV=1 - [EMC4_MOUSE]                                      | 14.21 | 1 | 2  | 2  | 7   | 1.393 | 1.082 | 1.028 | 0.861 | 18.20  | 14.21 | 3  | 7   | 183  | 20.1  | 8.62  |
| Q8BZ32   | Putative Polycomb group protein ASXL2 OS=Mus musculus GN=Asxl2 PE=2 SV=1 - [ASXL2_MOUSE]                                    | 4.74  | 4 | 3  | 3  | 3   | 0.987 | 0.502 | 0.831 | 0.861 | 5.09   | 4.74  | 3  | 3   | 1370 | 147.0 | 8.81  |
| Q8K411-2 | Isoform 2 of Presequence protease, mitochondrial OS=Mus musculus GN=Ptrm1 -                                                 | 40.87 | 3 | 33 | 33 | 94  | 1.113 | 0.792 | 0.806 | 0.861 | 278.12 | 40.87 | 57 | 94  | 1035 | 117.1 | 7.12  |
| Q9ERT9   | Protein phosphatase 1 regulatory subunit 1A OS=Mus musculus GN=Ppp1r1a PE=2 SV=1 - [PPR1A_MOUSE]                            | 83.04 | 1 | 11 | 11 | 74  | 1.403 | 1.504 | 1.602 | 0.861 | 217.41 | 83.04 | 17 | 74  | 171  | 18.7  | 5.25  |
| E9QN31   | Putative ribosomal RNA methyltransferase NOP2 OS=Mus musculus GN=Nop2 PE=4 SV=1 - [E9QN31_MOUSE]                            | 4.28  | 2 | 3  | 3  | 7   | 0.858 | 0.974 | 1.063 | 0.861 | 16.46  | 4.28  | 4  | 7   | 794  | 86.9  | 9.19  |
| P70445   | Eukaryotic translation initiation factor 4E-binding protein 2 OS=Mus musculus GN=EIF4ebp2 PE=2 SV=1 - [EIF4EBP2_MOUSE]      | 47.50 | 1 | 3  | 3  | 23  | 1.825 | 1.088 | 1.022 | 0.861 | 61.96  | 47.50 | 6  | 23  | 120  | 12.9  | 6.52  |
| E9Q250   | Protein Pcdh7 OS=Mus musculus GN=Pcdh7 PE=2 SV=1 - [E9Q250_MOUSE]                                                           | 32.59 | 1 | 5  | 27 | 100 | 1.108 | 1.012 | 1.112 | 0.861 | 302.18 | 32.59 | 43 | 100 | 1255 | 136.7 | 5.17  |
| E9Q634   | Unconventional myosin-1e OS=Mus musculus GN=Myo1e PE=1 SV=1 - [MYO1E_MOUSE]                                                 | 6.23  | 1 | 6  | 6  | 17  | 0.999 | 0.611 | 0.794 | 0.861 | 46.66  | 6.23  | 9  | 17  | 1107 | 126.7 | 9.07  |
| P61375   | LIM/homeobox protein Lhx5 OS=Mus musculus GN=Lhx5 PE=2 SV=1 - [LHX5_MOUSE]                                                  | 4.48  | 5 | 2  | 2  | 3   | 0.726 | 0.722 | 0.817 | 0.861 | 8.47   | 4.48  | 2  | 3   | 402  | 44.4  | 7.71  |
| Q8BYW1-2 | Isoform 2 of Rho GTPase-activating protein 25 OS=Mus musculus GN=Arhgap25 -                                                 | 10.38 | 3 | 4  | 4  | 8   | 1.340 | 0.675 | 1.053 | 0.861 | 13.39  | 10.38 | 5  | 8   | 559  | 62.8  | 5.48  |
| Q9R0P5   | Dextrin OS=Mus musculus GN=Dstrn PE=1 SV=3 - [DEST_MOUSE]                                                                   | 75.15 | 1 | 13 | 15 | 142 | 1.336 | 0.847 | 1.002 | 0.861 | 343.08 | 75.15 | 26 | 142 | 165  | 18.5  | 7.97  |
| Q8K327   | Chromosome alignment-maintaining phosphoprotein 1 OS=Mus musculus GN=Champ1 PE=1 SV=1 - [CHAMP1_MOUSE]                      | 24.94 | 1 | 17 | 17 | 25  | 1.072 | 0.825 | 1.086 | 0.861 | 81.10  | 24.94 | 23 | 25  | 802  | 87.5  | 7.85  |
| P62267   | 40S ribosomal protein S23 OS=Mus musculus GN=Rps23 PE=2 SV=3 - [RS23_MOUSE]                                                 | 53.85 | 1 | 7  | 8  | 24  | 0.633 | 1.026 | 0.769 | 0.862 | 74.58  | 53.85 | 15 | 24  | 143  | 15.8  | 10.49 |
| Q9D819   | Inorganic pyrophosphatase OS=Mus musculus GN=Ppa1 PE=1 SV=1 - [IPYR_MOUSE]                                                  | 78.55 | 1 | 21 | 21 | 136 | 1.088 | 0.822 | 0.933 | 0.862 | 378.20 | 78.55 | 42 | 136 | 289  | 32.6  | 5.60  |
| G3X928   | SEC23-interacting protein OS=Mus musculus GN=Sec23ip PE=4 SV=1 - [G3X928_MOUSE]                                             | 21.44 | 2 | 18 | 20 | 89  | 0.972 | 0.946 | 0.806 | 0.862 | 256.82 | 21.44 | 35 | 89  | 998  | 110.7 | 5.72  |
| Q8VHV1   | Brain and acute leukemia cytoplasmic protein OS=Mus musculus GN=Baalc PE=2 SV=3 - [BAALC_MOUSE]                             | 19.31 | 3 | 3  | 3  | 12  | 1.174 | 0.798 | 0.935 | 0.862 | 20.97  | 19.31 | 5  | 12  | 145  | 15.5  | 7.06  |
| Q8CHP5-2 | Isoform 2 of Partner of Y14 and mego OS=Mus musculus GN=Wibg - [WIBG_MOUSE]                                                 | 26.73 | 2 | 3  | 3  | 16  | 1.352 | 0.662 | 1.160 | 0.862 | 36.11  | 26.73 | 5  | 16  | 202  | 22.7  | 9.48  |
| Q9CQZ0-2 | Isoform 2 of ORM1-like protein 2 OS=Mus musculus GN=Ormdl2 - [ORML2_MOUSE]                                                  | 11.70 | 3 | 1  | 1  | 2   | 0.523 | 0.880 | 0.750 | 0.862 | 6.23   | 11.70 | 2  | 2   | 94   | 10.8  | 9.52  |
| Q8K1C0-3 | Isoform 3 of Protein angel homolog 2 OS=Mus musculus GN=Angel2 - [ANGEL2_MOUSE]                                             | 5.87  | 5 | 2  | 2  | 3   | 0.643 | 0.962 | 0.965 | 0.862 | 10.51  | 5.87  | 3  | 3   | 375  | 41.9  | 7.18  |
| O55028   | [3-methyl-2-oxobutanoate dehydrogenase [lipoamide]] kinase, mitochondrial OS=Mus musculus GN=Bckdk PE=1 SV=1 - [BCKD_MOUSE] | 25.73 | 2 | 8  | 8  | 17  | 0.839 | 1.019 | 0.704 | 0.862 | 54.17  | 25.73 | 12 | 17  | 412  | 46.6  | 8.91  |
| Q92119   | Exosome complex component RRP41 OS=Mus musculus GN=Exosc4 PE=2 SV=3 - [EXOS4_MOUSE]                                         | 53.88 | 1 | 8  | 8  | 14  | 1.185 | 1.018 | 0.763 | 0.862 | 32.26  | 53.88 | 12 | 14  | 245  | 26.2  | 6.15  |
| Q61333   | Tumor necrosis factor alpha-induced protein 2 OS=Mus musculus GN=Trifap2 PE=2 SV=2 - [TNAP2_MOUSE]                          | 3.76  | 2 | 2  | 2  | 3   | 1.540 | 1.234 | 1.237 | 0.862 | 2.51   | 3.76  | 2  | 3   | 691  | 78.1  | 6.07  |
| Q9DAM5   | Mitochondrial thiamine pyrophosphate carrier OS=Mus musculus GN=Slc25a19 PE=2 SV=1 - [TPC_MOUSE]                            | 13.21 | 3 | 5  | 5  | 9   | 0.757 | 0.805 | 0.842 | 0.862 | 22.63  | 13.21 | 9  | 9   | 318  | 35.6  | 9.20  |



|          |                                                                                                                                         |       |    |    |    |     |       |       |       |       |        |       |    |     |      |       |      |
|----------|-----------------------------------------------------------------------------------------------------------------------------------------|-------|----|----|----|-----|-------|-------|-------|-------|--------|-------|----|-----|------|-------|------|
| Q8K2I4   | Beta-mannosidase<br>OS=Mus musculus<br>GN=Manba PE=2 SV=1 -<br>[MANBA_MOUSE]                                                            | 4.89  | 2  | 4  | 4  | 11  | 1.829 | 0.899 | 0.824 | 0.864 | 23.18  | 4.89  | 6  | 11  | 879  | 100.8 | 7.25 |
| Q8VDI7   | Ubiquitin-associated<br>domain-containing protein<br>1 OS=Mus musculus<br>GN=Ubac1 PE=2 SV=2 -<br>[UBAC1_MOUSE]                         | 28.61 | 2  | 3  | 11 | 29  | 1.795 | 1.376 | 1.170 | 0.864 | 88.32  | 28.61 | 17 | 29  | 409  | 45.5  | 4.97 |
| G3UWH9   | Conserved oligomeric Golgi<br>complex subunit 4<br>(Fragment) OS=Mus<br>musculus GN=Cog4 PE=2<br>SV=1 -<br>[COG4_MOUSE]                 | 15.86 | 6  | 10 | 10 | 21  | 0.654 | 0.837 | 0.700 | 0.865 | 60.98  | 15.86 | 17 | 21  | 763  | 86.2  | 5.16 |
| Q8VDC0   | Probable leucine-tRNA<br>ligase, mitochondrial<br>OS=Mus musculus<br>GN=Lars2 PE=2 SV=1 -<br>[SYLM_MOUSE]                               | 14.41 | 3  | 11 | 11 | 22  | 1.034 | 0.938 | 0.980 | 0.865 | 52.28  | 14.41 | 18 | 22  | 902  | 101.4 | 8.19 |
| Q6WQJ1   | Sn1-specific diacylglycerol<br>lipase alpha OS=Mus<br>musculus GN=Dagla PE=1<br>SV=2 - [DGLA_MOUSE]                                     | 24.90 | 1  | 22 | 22 | 88  | 0.766 | 1.041 | 1.290 | 0.865 | 233.70 | 24.90 | 39 | 88  | 1044 | 115.3 | 6.42 |
| D3YYY8   | Protein Arhgef26 OS=Mus<br>musculus GN=Arhgef26<br>PE=4 SV=1 -<br>[D3YYY8_MOUSE]                                                        | 10.24 | 1  | 6  | 6  | 9   | 1.130 | 0.618 | 0.969 | 0.865 | 27.46  | 10.24 | 9  | 9   | 869  | 97.3  | 8.72 |
| Q8C5W0-4 | Isoform 4 of Calmin<br>OS=Mus musculus<br>GN=Cimn -<br>[CLMN_MOUSE]                                                                     | 28.31 | 4  | 21 | 21 | 70  | 0.804 | 0.923 | 0.956 | 0.865 | 200.25 | 28.31 | 34 | 70  | 1021 | 113.4 | 4.97 |
| P11031   | Activated RNA polymerase<br>II transcriptional<br>coactivator p15 OS=Mus<br>musculus GN=Sub1 PE=1<br>SV=3 - [TCP4_MOUSE]                | 29.92 | 1  | 5  | 5  | 18  | 0.708 | 1.004 | 0.909 | 0.865 | 37.53  | 29.92 | 9  | 18  | 127  | 14.4  | 9.60 |
| P39688   | Tyrosine-protein kinase<br>Fyn OS=Mus musculus<br>GN=Fyn PE=1 SV=4 -<br>[FYN_MOUSE]                                                     | 47.30 | 20 | 17 | 24 | 100 | 0.749 | 0.666 | 0.756 | 0.865 | 260.80 | 47.30 | 41 | 100 | 537  | 60.6  | 6.67 |
| Q8BFQ8   | Parkinson disease 7<br>domain-containing protein<br>1 OS=Mus musculus<br>GN=Pddc1 PE=1 SV=1 -<br>[PDDC1_MOUSE]                          | 45.91 | 1  | 7  | 7  | 28  | 0.955 | 0.978 | 0.918 | 0.865 | 97.22  | 45.91 | 12 | 28  | 220  | 23.3  | 7.05 |
| B2RY56   | RNA-binding protein 25<br>OS=Mus musculus<br>GN=Rbm25 PE=1 SV=2 -<br>[RBM25_MOUSE]                                                      | 14.08 | 1  | 10 | 11 | 41  | 0.732 | 0.887 | 0.886 | 0.865 | 126.16 | 14.08 | 17 | 41  | 838  | 99.5  | 6.32 |
| Q9Z2M6   | Ubiquitin-like protein 3<br>OS=Mus musculus<br>GN=Ubl3 PE=1 SV=1 -<br>[UBL3_MOUSE]                                                      | 52.99 | 1  | 5  | 5  | 11  | 1.448 | 0.595 | 0.865 | 0.865 | 33.39  | 52.99 | 9  | 11  | 117  | 13.2  | 6.92 |
| Q7TSC1   | Protein PRRC2A OS=Mus<br>musculus GN=Prrc2a PE=1<br>SV=1 - [PRC2A_MOUSE]                                                                | 21.73 | 2  | 34 | 38 | 167 | 1.194 | 0.787 | 1.232 | 0.865 | 412.10 | 21.73 | 66 | 167 | 2158 | 229.1 | 9.39 |
| P07356   | Annexin A2 OS=Mus<br>musculus GN=Anxa2 PE=1<br>SV=2 - [ANXA2_MOUSE]                                                                     | 67.85 | 4  | 21 | 21 | 75  | 0.933 | 4.251 | 0.673 | 0.865 | 226.18 | 67.85 | 36 | 75  | 339  | 38.7  | 7.69 |
| A2BGN7   | Protein MANBAL OS=Mus<br>musculus GN=Manbal<br>PE=4 SV=1 -<br>[A2BGN7_MOUSE]                                                            | 9.41  | 1  | 1  | 1  | 2   | 0.539 | 0.771 | 0.755 | 0.866 | 4.75   | 9.41  | 2  | 2   | 85   | 9.4   | 9.38 |
| Q639I8   | Serum deprivation-<br>response protein OS=Mus<br>musculus GN=Sdpr PE=1<br>SV=3 - [SDPR_MOUSE]                                           | 15.79 | 1  | 6  | 6  | 12  | 1.533 | 1.506 | 0.909 | 0.866 | 30.58  | 15.79 | 8  | 12  | 418  | 46.7  | 5.21 |
| Q3TZ8-3  | Isoform 3 of<br>Polynucleotide 5'-hydroxyl-<br>kinase NOL9 OS=Mus<br>musculus GN=Nol9 -<br>[NOL9_MOUSE]                                 | 3.03  | 3  | 3  | 3  | 5   | 0.570 | 0.706 | 0.755 | 0.866 | 10.60  | 3.03  | 4  | 5   | 627  | 70.9  | 9.44 |
| A2A115   | Endoplasmic reticulum<br>mannosyl-oligosaccharide<br>1,2-alpha-mannosidase<br>OS=Mus musculus<br>GN=Man1b1 PE=2 SV=1 -<br>[MA1B1_MOUSE] | 10.79 | 1  | 7  | 7  | 11  | 1.033 | 0.825 | 0.742 | 0.866 | 20.90  | 10.79 | 8  | 11  | 658  | 75.1  | 8.48 |
| Q61324-2 | Isoform 2 of Aryl<br>hydrocarbon receptor<br>nuclear translocator 2<br>OS=Mus musculus<br>GN=Arnt2 -<br>[ARNT2_MOUSE]                   | 20.40 | 2  | 8  | 8  | 31  | 0.865 | 0.714 | 1.005 | 0.866 | 94.70  | 20.40 | 14 | 31  | 701  | 76.8  | 6.80 |
| Q6ZWX6   | Eukaryotic translation<br>initiation factor 2 subunit 1<br>OS=Mus musculus<br>GN=Elf2s1 PE=1 SV=3 -<br>[IF2A_MOUSE]                     | 58.41 | 1  | 20 | 20 | 69  | 0.769 | 0.876 | 0.837 | 0.866 | 196.88 | 58.41 | 37 | 69  | 315  | 36.1  | 5.08 |
| Q80Y56   | Actin filament-associated<br>protein 1 OS=Mus<br>musculus GN=Afap1 PE=1<br>SV=1 - [AFAP1_MOUSE]                                         | 8.07  | 2  | 5  | 6  | 11  | 1.365 | 0.913 | 0.986 | 0.866 | 29.93  | 8.07  | 9  | 11  | 731  | 80.6  | 8.68 |
| Q9WTS6-2 | Isoform 2 of Teneurin-3<br>OS=Mus musculus<br>GN=Tenm3 -<br>[TEN3_MOUSE]                                                                | 10.60 | 5  | 16 | 21 | 59  | 0.659 | 0.654 | 0.808 | 0.866 | 154.72 | 10.60 | 32 | 59  | 2699 | 300.9 | 6.42 |
| F7AYW2   | Protein PRRC2B<br>(Fragment) OS=Mus<br>musculus GN=Prrc2b<br>PE=4 SV=1 -<br>[PRC2B_MOUSE]                                               | 21.13 | 2  | 1  | 23 | 48  | 0.963 | 0.429 | 1.420 | 0.866 | 148.37 | 21.13 | 37 | 48  | 1472 | 158.7 | 7.93 |
| G3XA10   | Heterogeneous nuclear<br>ribonucleoprotein U<br>OS=Mus musculus<br>GN=Hnmpu PE=4 SV=1 -<br>[G3XA10_MOUSE]                               | 36.95 | 2  | 31 | 31 | 194 | 0.826 | 0.741 | 0.929 | 0.866 | 483.04 | 36.95 | 51 | 194 | 793  | 86.8  | 5.92 |

|          |                                                                                                                              |       |    |    |    |     |       |       |       |       |        |       |     |     |      |       |       |
|----------|------------------------------------------------------------------------------------------------------------------------------|-------|----|----|----|-----|-------|-------|-------|-------|--------|-------|-----|-----|------|-------|-------|
| Q9CZ28   | Vacuolar-sorting protein SNF8 OS=Mus musculus GN=Snf8 PE=2 SV=1 - [SNF8_MOUSE]                                               | 29.07 | 2  | 7  | 7  | 20  | 1.049 | 1.312 | 0.829 | 0.866 | 51.30  | 29.07 | 12  | 20  | 258  | 28.9  | 6.65  |
| Q8JZP9   | GAS2-like protein 1 OS=Mus musculus GN=Gas2l1 PE=2 SV=1 - [GAZL1_MOUSE]                                                      | 13.42 | 3  | 6  | 6  | 18  | 1.048 | 1.047 | 1.206 | 0.866 | 66.40  | 13.42 | 11  | 18  | 678  | 72.4  | 10.01 |
| Q8VED5   | Keratin, type II cytoskeletal 79 OS=Mus musculus GN=Krt79 PE=1 SV=2 - [K2C79_MOUSE]                                          | 12.05 | 2  | 2  | 3  | 18  | 1.402 | 1.116 | 1.031 | 0.866 | 32.81  | 12.05 | 4   | 18  | 531  | 57.5  | 7.69  |
| P35980   | 60S ribosomal protein L18 OS=Mus musculus GN=Rpl18 PE=2 SV=3 - [RL18_MOUSE]                                                  | 32.45 | 5  | 6  | 6  | 36  | 0.464 | 0.519 | 0.696 | 0.867 | 107.29 | 32.45 | 11  | 36  | 188  | 21.6  | 11.78 |
| E9QKB1   | Dynein light chain 1, cytoplasmic OS=Mus musculus GN=Dlc1 PE=2 SV=1 - [E9QKB1_MOUSE]                                         | 2.47  | 4  | 2  | 2  | 4   | 0.782 | 0.814 | 0.782 | 0.867 | 7.08   | 2.47  | 4   | 4   | 1092 | 123.3 | 7.58  |
| O55106   | Striatin OS=Mus musculus GN=Strn PE=1 SV=2 - [STRN_MOUSE]                                                                    | 35.64 | 3  | 17 | 20 | 90  | 1.069 | 0.869 | 1.235 | 0.867 | 299.36 | 35.64 | 33  | 90  | 780  | 85.9  | 5.27  |
| Q8BRK9   | Alpha-mannosidase 2x OS=Mus musculus GN=Man2a2 PE=2 SV=2 - [MA2A2_MOUSE]                                                     | 6.16  | 2  | 6  | 6  | 13  | 0.496 | 0.906 | 0.753 | 0.867 | 43.58  | 6.16  | 11  | 13  | 1152 | 130.6 | 6.87  |
| E9Q1V5   | Sphingomyelin phosphodiesterase 4 OS=Mus musculus GN=Smpd4 PE=2 SV=1 - [SPMP4_MOUSE]                                         | 12.07 | 10 | 6  | 6  | 7   | 1.413 | 1.200 | 0.899 | 0.867 | 19.43  | 12.07 | 7   | 7   | 721  | 81.7  | 8.65  |
| Q8BGD9   | Eukaryotic translation initiation factor 4B OS=Mus musculus GN=Elf4b PE=1 SV=1 - [IF4B_MOUSE]                                | 31.59 | 1  | 20 | 20 | 145 | 1.170 | 0.706 | 1.300 | 0.867 | 380.53 | 31.59 | 37  | 145 | 611  | 68.8  | 5.67  |
| Q9QYC0   | Alpha-adducin OS=Mus musculus GN=Add1 PE=1 SV=2 - [ADDA_MOUSE]                                                               | 48.71 | 4  | 1  | 26 | 280 | 3.911 | 1.988 | 3.153 | 0.867 | 735.99 | 48.71 | 47  | 280 | 735  | 80.6  | 5.90  |
| Q9R008   | Mevalonate kinase OS=Mus musculus GN=Mvk PE=2 SV=1 - [KIME_MOUSE]                                                            | 36.20 | 3  | 12 | 12 | 31  | 0.745 | 0.472 | 0.623 | 0.867 | 89.45  | 36.20 | 20  | 31  | 395  | 41.9  | 6.68  |
| Q91WE4   | UPF0729 protein C18orf32 homolog OS=Mus musculus PE=2 SV=1 - [CR032_MOUSE]                                                   | 37.50 | 1  | 3  | 3  | 7   | 0.480 | 0.721 | 0.836 | 0.867 | 7.66   | 37.50 | 5   | 7   | 72   | 8.0   | 9.35  |
| Q8BWZ3   | N-alpha-acetyltransferase 25, NatB auxiliary subunit OS=Mus musculus GN=Naa25 PE=1 SV=1 - [NAA25_MOUSE]                      | 14.51 | 3  | 13 | 14 | 41  | 0.775 | 0.811 | 0.821 | 0.867 | 104.82 | 14.51 | 24  | 41  | 972  | 111.6 | 6.52  |
| P61215   | Carbonic anhydrase-related protein 10 OS=Mus musculus GN=Ca10 PE=2 SV=1 - [CAH10_MOUSE]                                      | 30.49 | 4  | 6  | 6  | 17  | 1.007 | 0.993 | 0.814 | 0.867 | 40.00  | 30.49 | 9   | 17  | 328  | 37.5  | 8.09  |
| D3YX00   | Protein Dgkh OS=Mus musculus GN=Dgkh PE=4 SV=1 - [D3YX0_MOUSE]                                                               | 21.89 | 1  | 15 | 19 | 44  | 0.763 | 1.251 | 1.514 | 0.867 | 134.15 | 21.89 | 29  | 44  | 1156 | 127.3 | 6.33  |
| P20918   | Plasminogen OS=Mus musculus GN=Plg PE=1 SV=3 - [PLMN_MOUSE]                                                                  | 26.60 | 2  | 17 | 18 | 70  | 3.526 | 1.758 | 0.485 | 0.867 | 198.22 | 26.60 | 32  | 70  | 812  | 90.7  | 6.60  |
| Q80VL1   | Tudor and KH domain-containing protein OS=Mus musculus GN=Tdrkh PE=1 SV=1 - [TDRKH_MOUSE]                                    | 28.57 | 1  | 12 | 12 | 56  | 1.044 | 0.951 | 0.791 | 0.867 | 206.04 | 28.57 | 20  | 56  | 560  | 62.1  | 4.94  |
| P55096   | ATP-binding cassette sub-family D member 3 OS=Mus musculus GN=Abcc3 PE=1 SV=2 - [ABCD3_MOUSE]                                | 36.42 | 1  | 19 | 20 | 66  | 0.478 | 0.623 | 0.686 | 0.867 | 159.70 | 36.42 | 35  | 66  | 659  | 75.4  | 9.26  |
| D3YZP9   | Coiled-coil domain-containing protein 6 OS=Mus musculus GN=Ccdc6 PE=3 SV=1 - [CCDC6_MOUSE]                                   | 44.56 | 3  | 22 | 22 | 115 | 1.951 | 0.988 | 1.127 | 0.867 | 316.53 | 44.56 | 39  | 115 | 469  | 52.9  | 7.34  |
| E9QQ25   | Striated muscle-specific serine/threonine-protein kinase OS=Mus musculus GN=Speg PE=2 SV=1 - [E9QQ25_MOUSE]                  | 6.53  | 6  | 13 | 16 | 42  | 0.512 | 1.160 | 1.763 | 0.868 | 118.80 | 6.53  | 26  | 42  | 3262 | 354.1 | 8.18  |
| Q9Z0H8-2 | Isoform 2 of CAP-Gly domain-containing linker protein 2 OS=Mus musculus GN=Clip2 - [CLIP2_MOUSE]                             | 57.91 | 6  | 1  | 58 | 277 | 1.881 | 1.146 | 0.903 | 0.868 | 787.74 | 57.91 | 100 | 277 | 1012 | 111.8 | 6.55  |
| Q9EP97   | Sentrin-specific protease 3 OS=Mus musculus GN=Senp3 PE=1 SV=1 - [SENP3_MOUSE]                                               | 7.57  | 1  | 3  | 3  | 4   | 0.466 | 0.826 | 0.754 | 0.868 | 14.94  | 7.57  | 4   | 4   | 568  | 64.4  | 8.75  |
| Q922Q8   | Leucine-rich repeat-containing protein 59 OS=Mus musculus GN=Lrrc59 PE=2 SV=1 - [LRRC59_MOUSE]                               | 42.67 | 1  | 11 | 11 | 49  | 0.609 | 0.582 | 0.851 | 0.868 | 127.07 | 42.67 | 19  | 49  | 307  | 34.9  | 9.52  |
| G3X911   | DNA segment, Chr 6, Wayne State University 176, expressed, isoform CRA_a OS=Mus musculus GN=Fam3c PE=4 SV=1 - [G3X911_MOUSE] | 43.65 | 6  | 7  | 7  | 13  | 0.614 | 1.017 | 0.959 | 0.868 | 40.95  | 43.65 | 11  | 13  | 197  | 21.5  | 7.71  |
| Q3USC7   | Prickle-like protein 1 OS=Mus musculus GN=Prickle1 PE=1 SV=1 - [PRIC1_MOUSE]                                                 | 9.01  | 1  | 5  | 5  | 9   | 1.166 | 1.009 | 1.123 | 0.868 | 12.90  | 9.01  | 6   | 9   | 832  | 94.1  | 6.28  |

|          |                                                                                                                                  |       |    |    |    |     |       |       |       |       |        |       |     |     |      |       |       |
|----------|----------------------------------------------------------------------------------------------------------------------------------|-------|----|----|----|-----|-------|-------|-------|-------|--------|-------|-----|-----|------|-------|-------|
| Q9ERY9   | Probable ergosterol biosynthetic protein 28<br>OS=Mus musculus<br>GN=ORF11 PE=2 SV=1 - [ERG28_MOUSE]                             | 17.14 | 2  | 2  | 2  | 8   | 0.438 | 0.761 | 0.698 | 0.868 | 21.95  | 17.14 | 4   | 8   | 140  | 15.8  | 9.91  |
| Q3U1F9   | Phosphoprotein associated with glycosphingolipid-enriched microdomains 1<br>OS=Mus musculus<br>GN=Pag1 PE=1 SV=2 - [PHAG1_MOUSE] | 37.53 | 1  | 11 | 11 | 39  | 1.226 | 0.990 | 1.006 | 0.868 | 126.66 | 37.53 | 17  | 39  | 429  | 46.5  | 4.81  |
| D3Z3B2   | V-type proton ATPase 16 kDa proteolipid subunit (Fragment) OS=Mus musculus GN=Atp6v0c PE=2 SV=1 - [Atp6v0c_MOUSE]                | 15.52 | 3  | 1  | 1  | 9   | 0.424 | 2.805 | 1.031 | 0.868 | 38.14  | 15.52 | 2   | 9   | 116  | 11.9  | 6.64  |
| Q9CQ13   | Coordinator of PRMT5 and differentiation stimulator OS=Mus musculus GN=Coprs PE=1 SV=1 - [COPRS_MOUSE]                           | 28.90 | 1  | 2  | 2  | 5   | 2.039 | 0.915 | 0.771 | 0.868 | 20.75  | 28.90 | 3   | 5   | 173  | 18.7  | 4.08  |
| Q9CQD4   | Charged multivesicular body protein 1b-2 OS=Mus musculus GN=Chmp1b2 PE=2 SV=2 - [CH1B2_MOUSE]                                    | 30.15 | 1  | 3  | 9  | 38  | 1.218 | 0.679 | 0.926 | 0.868 | 90.66  | 30.15 | 16  | 38  | 199  | 22.1  | 8.10  |
| O35400   | Sulfotransferase family cytosolic 2B member 1 OS=Mus musculus GN=Sult2b1 PE=2 SV=2 - [ST2B1_MOUSE]                               | 1.78  | 3  | 1  | 1  | 3   | 1.248 | 1.223 | 0.927 | 0.868 | 5.78   | 1.78  | 1   | 3   | 338  | 38.3  | 5.17  |
| D3YX6    | Tripartite motif-containing protein 46 OS=Mus musculus GN=Trim46 PE=2 SV=1 - [TRIM46_MOUSE]                                      | 30.84 | 5  | 19 | 20 | 42  | 0.830 | 1.059 | 1.239 | 0.868 | 117.07 | 30.84 | 35  | 42  | 736  | 80.9  | 7.87  |
| P97863-3 | Isoform 3 of Nuclear factor 1 B-type OS=Mus musculus GN=Nfib - [NFIB_MOUSE]                                                      | 10.00 | 8  | 3  | 4  | 13  | 1.028 | 1.265 | 0.944 | 0.868 | 28.33  | 10.00 | 7   | 13  | 420  | 47.4  | 8.87  |
| O89086   | Putative RNA-binding protein 3 OS=Mus musculus GN=Rbm3 PE=1 SV=1 - [RBM3_MOUSE]                                                  | 41.83 | 2  | 3  | 3  | 46  | 1.968 | 0.864 | 1.339 | 0.868 | 146.97 | 41.83 | 6   | 46  | 153  | 16.6  | 7.50  |
| B2RRE2   | Myo18a protein OS=Mus musculus GN=Myo18a PE=2 SV=1 - [B2RRE2_MOUSE]                                                              | 36.30 | 14 | 71 | 74 | 291 | 0.958 | 0.659 | 1.065 | 0.868 | 886.22 | 36.30 | 124 | 291 | 2047 | 232.0 | 6.10  |
| G5E8L7   | Hematopoietic cell transcript 1, isoform CRA_b OS=Mus musculus GN=Hemt1 PE=4 SV=1 - [G5E8L7_MOUSE]                               | 3.41  | 1  | 1  | 1  | 1   | 1.761 | 0.833 | 1.202 | 0.868 | 0.00   | 3.41  | 1   | 1   | 176  | 19.9  | 5.54  |
| P23819-4 | Isoform 4 of Glutamate receptor 2 OS=Mus musculus GN=Gria2 - [GRIA2_MOUSE]                                                       | 48.32 | 4  | 2  | 42 | 168 | 1.464 | 1.744 | 1.304 | 0.869 | 450.82 | 48.32 | 70  | 168 | 921  | 102.8 | 7.72  |
| B8J1J3   | Uncharacterized protein (Fragment) OS=Mus musculus GN=Cretbf PE=2 SV=1 - [B8J1J3_MOUSE]                                          | 6.57  | 3  | 1  | 1  | 1   | 1.875 | 1.060 | 0.815 | 0.869 | 0.00   | 6.57  | 1   | 1   | 137  | 16.1  | 10.51 |
| A2ACD2   | V-set and transmembrane domain-containing protein 2-like protein OS=Mus musculus GN=Vstm2l PE=4 SV=1 - [VSTM2L_MOUSE]            | 21.78 | 2  | 3  | 3  | 7   | 1.766 | 1.284 | 0.861 | 0.869 | 31.52  | 21.78 | 5   | 7   | 202  | 22.1  | 8.84  |
| Q8R2Y0-2 | Isoform 2 of Monoacylglycerol lipase ABHD6 OS=Mus musculus GN=Abhd6 - [ABHD6_MOUSE]                                              | 37.02 | 2  | 9  | 9  | 24  | 0.759 | 1.194 | 1.118 | 0.869 | 65.14  | 37.02 | 17  | 24  | 289  | 32.8  | 8.34  |
| E9Q6H8   | Protein Plekha5 OS=Mus musculus GN=Plekha5 PE=2 SV=1 - [E9Q6H8_MOUSE]                                                            | 24.35 | 1  | 25 | 26 | 58  | 0.928 | 0.944 | 1.108 | 0.869 | 165.11 | 24.35 | 43  | 58  | 1269 | 144.3 | 7.39  |
| A2AGH8   | Mediator of RNA polymerase II transcription subunit 12 OS=Mus musculus GN=Med12 PE=2 SV=1 - [MED12_MOUSE]                        | 1.48  | 5  | 2  | 3  | 6   | 2.105 | 1.381 | 1.109 | 0.869 | 24.55  | 1.48  | 4   | 6   | 2157 | 240.7 | 7.17  |
| Q9DOK0   | TBC1 domain family member 7 OS=Mus musculus GN=Tbc1d7 PE=1 SV=1 - [TBC1D7_MOUSE]                                                 | 26.62 | 5  | 7  | 8  | 16  | 1.107 | 0.897 | 0.781 | 0.869 | 33.92  | 26.62 | 12  | 16  | 293  | 33.8  | 7.20  |
| B9EHJ3   | Tight junction protein ZO-1 OS=Mus musculus GN=Tjp1 PE=2 SV=1 - [B9EHJ3_MOUSE]                                                   | 32.17 | 1  | 1  | 42 | 185 | 1.285 | 0.971 | 1.083 | 0.869 | 528.74 | 32.17 | 72  | 185 | 1685 | 188.7 | 6.67  |
| P10923   | Osteopontin OS=Mus musculus GN=Spp1 PE=1 SV=1 - [OSTP_MOUSE]                                                                     | 10.54 | 3  | 2  | 2  | 2   | 3.668 | 1.386 | 0.754 | 0.869 | 8.28   | 10.54 | 2   | 2   | 294  | 32.4  | 4.53  |
| Q9CQU3   | Protein RER1 OS=Mus musculus GN=Rer1 PE=1 SV=1 - [RER1_MOUSE]                                                                    | 18.37 | 1  | 3  | 3  | 14  | 0.894 | 0.782 | 0.635 | 0.869 | 41.98  | 18.37 | 4   | 14  | 196  | 23.0  | 9.51  |
| Q8K019-3 | Isoform 3 of Bcl-2-associated transcription factor 1 OS=Mus musculus GN=Bclaf1 - [BCLF1_MOUSE]                                   | 11.23 | 4  | 8  | 9  | 28  | 0.875 | 0.881 | 0.950 | 0.869 | 58.52  | 11.23 | 15  | 28  | 748  | 86.0  | 10.08 |
| Q9QX47-3 | Isoform 3 of Protein SON OS=Mus musculus GN=Son - [SON_MOUSE]                                                                    | 15.14 | 9  | 24 | 24 | 58  | 1.175 | 0.999 | 0.909 | 0.869 | 175.83 | 15.14 | 35  | 58  | 2404 | 261.3 | 5.68  |
| Q91IUZ5  | Inositol monophosphatase 2 OS=Mus musculus GN=Impa2 PE=1 SV=1 - [IMPA2_MOUSE]                                                    | 4.83  | 1  | 2  | 2  | 2   | 0.761 | 1.273 | 1.443 | 0.869 | 4.35   | 4.83  | 2   | 2   | 290  | 31.7  | 6.23  |
| B9EKN8   | TRAF2 and NCK interacting kinase OS=Mus musculus GN=Trnik PE=2 SV=1 - [B9EKN8_MOUSE]                                             | 28.48 | 10 | 27 | 35 | 118 | 0.947 | 0.908 | 1.257 | 0.869 | 346.22 | 28.48 | 61  | 118 | 1352 | 153.9 | 7.09  |

|          |                                                                                                                             |       |   |    |     |     |       |       |       |       |         |       |     |     |      |       |      |
|----------|-----------------------------------------------------------------------------------------------------------------------------|-------|---|----|-----|-----|-------|-------|-------|-------|---------|-------|-----|-----|------|-------|------|
| Q8CGQ2   | A disintegrin and metalloproteinase domain 4<br>OS=Mus musculus<br>GN=Adam4 PE=2 SV=1 - [Q8CGQ2_MOUSE]                      | 1.83  | 1 | 1  | 1   | 1   | 0.966 | 0.644 | 0.775 | 0.869 | 0.00    | 1.83  | 1   | 1   | 763  | 84.4  | 7.77 |
| Q9CQF3   | Cleavage and polyadenylation specificity factor subunit 5 OS=Mus musculus GN=Nudt21 PE=2 SV=1 - [E9PVG8_MOUSE]              | 49.34 | 1 | 10 | 10  | 27  | 0.737 | 0.891 | 0.757 | 0.869 | 73.74   | 49.34 | 15  | 27  | 227  | 26.2  | 8.82 |
| E9PVG8   | Protein 9530053A07Rik<br>OS=Mus musculus<br>GN=9530053A07Rik PE=4 SV=1 - [E9PVG8_MOUSE]                                     | 1.39  | 1 | 1  | 2   | 6   | 1.358 | 0.766 | 1.068 | 0.869 | 14.32   | 1.39  | 3   | 6   | 2581 | 280.0 | 6.18 |
| Q6NZK8   | Protein tyrosine phosphatase domain-containing protein 1<br>OS=Mus musculus<br>GN=Ptpdc1 PE=2 SV=1 - [E9PVG8_MOUSE]         | 21.29 | 3 | 11 | 11  | 20  | 1.070 | 0.994 | 0.888 | 0.869 | 41.54   | 21.29 | 15  | 20  | 747  | 83.9  | 6.34 |
| P53996-2 | Isoform 2 of Cellular nucleic acid-binding protein OS=Mus musculus GN=Cnbp -                                                | 47.06 | 5 | 7  | 7   | 43  | 2.101 | 1.035 | 1.291 | 0.869 | 137.50  | 47.06 | 14  | 43  | 170  | 18.7  | 7.71 |
| Q9CU62   | Structural maintenance of chromosomes protein 1A<br>OS=Mus musculus<br>GN=Smc1a PE=1 SV=4 - [SMC1A_MOUSE]                   | 30.82 | 2 | 41 | 41  | 106 | 0.744 | 0.716 | 0.929 | 0.869 | 274.34  | 30.82 | 62  | 106 | 1233 | 143.1 | 7.64 |
| E9Q614   | Protein Chd3 OS=Mus musculus GN=Chd3 PE=2 SV=1 - [E9Q614_MOUSE]                                                             | 7.97  | 4 | 4  | 15  | 34  | 0.865 | 1.108 | 0.878 | 0.869 | 92.60   | 7.97  | 23  | 34  | 2021 | 228.8 | 6.35 |
| Q9JLJ8   | Squamous cell carcinoma antigen recognized by T-cells 3 OS=Mus musculus GN=Sart3 PE=2 SV=1 - [SART3_MOUSE]                  | 32.54 | 2 | 23 | 24  | 68  | 0.596 | 0.779 | 0.821 | 0.870 | 172.21  | 32.54 | 39  | 68  | 962  | 109.5 | 5.24 |
| Q6PH08   | ERC protein 2 OS=Mus musculus GN=Ercc2 PE=1 SV=2 - [ERC2_MOUSE]                                                             | 51.93 | 3 | 28 | 56  | 262 | 1.187 | 1.465 | 1.886 | 0.870 | 630.40  | 51.93 | 96  | 262 | 957  | 110.6 | 7.03 |
| Q9DBZ5   | Eukaryotic translation initiation factor 3 subunit K<br>OS=Mus musculus<br>GN=EIF3K PE=1 SV=1 - [EIF3K_MOUSE]               | 31.65 | 2 | 5  | 5   | 28  | 1.279 | 1.319 | 0.880 | 0.870 | 80.54   | 31.65 | 10  | 28  | 218  | 25.1  | 4.93 |
| D3YU00   | STAR-related lipid transfer (START) domain containing 5, isoform CRA_a OS=Mus musculus GN=Stard5 PE=4 SV=1 - [D3YU00_MOUSE] | 4.37  | 2 | 1  | 1   | 5   | 1.288 | 0.473 | 0.785 | 0.870 | 13.88   | 4.37  | 2   | 5   | 206  | 23.2  | 5.45 |
| E9PYF7   | AP1AR OS=Mus musculus GN=Ap1ar PE=4 SV=1 - [E9PYF7_MOUSE]                                                                   | 11.74 | 1 | 4  | 4   | 10  | 1.206 | 1.163 | 1.235 | 0.870 | 18.35   | 11.74 | 7   | 10  | 298  | 33.8  | 4.87 |
| Q92239   | Fatty acyl-CoA reductase 1<br>OS=Mus musculus<br>GN=Far1 PE=1 SV=1 - [FAR1_MOUSE]                                           | 13.79 | 6 | 6  | 6   | 12  | 1.071 | 0.806 | 0.694 | 0.870 | 29.63   | 13.79 | 9   | 12  | 515  | 59.4  | 9.19 |
| F6TRJ8   | Coiled-coil domain-containing protein 85A (Fragment) OS=Mus musculus GN=Ccdc85a PE=4 SV=1 - [F6TRJ8_MOUSE]                  | 38.19 | 2 | 2  | 5   | 12  | 1.301 | 1.021 | 1.205 | 0.870 | 34.82   | 38.19 | 9   | 12  | 144  | 16.0  | 6.27 |
| Q6IR42   | Zinc finger CW-type PWWP domain protein 1 OS=Mus musculus GN=Zcwpw1 PE=2 SV=2 - [ZCPW1_MOUSE]                               | 1.75  | 1 | 1  | 1   | 1   | 1.446 | 1.211 | 0.787 | 0.870 | 2.35    | 1.75  | 1   | 1   | 630  | 70.5  | 5.45 |
| Q3U1T9-4 | Isoform 4 of DENN domain containing protein 1B<br>OS=Mus musculus<br>GN=Dennd1b - [DEN1B_MOUSE]                             | 5.41  | 3 | 2  | 2   | 5   | 1.659 | 0.755 | 1.068 | 0.870 | 20.45   | 5.41  | 3   | 5   | 499  | 55.1  | 6.61 |
| P47962   | 60S ribosomal protein L5<br>OS=Mus musculus<br>GN=Rpl5 PE=1 SV=3 - [RL5_MOUSE]                                              | 41.75 | 2 | 15 | 16  | 96  | 0.674 | 0.714 | 0.759 | 0.870 | 267.40  | 41.75 | 27  | 96  | 297  | 34.4  | 9.77 |
| Q5SXC4   | Protein Vezf1 OS=Mus musculus GN=Vezf1 PE=2 SV=1 - [Q5SXC4_MOUSE]                                                           | 2.51  | 8 | 1  | 2   | 7   | 1.331 | 0.776 | 0.842 | 0.870 | 14.78   | 2.51  | 2   | 7   | 518  | 56.5  | 9.57 |
| Q8BH15-2 | Isoform 2 of CCR4-NOT transcription complex subunit 10 OS=Mus musculus GN=Cnot10 - [CNO10_MOUSE]                            | 10.36 | 6 | 7  | 7   | 11  | 0.877 | 1.122 | 0.846 | 0.870 | 26.70   | 10.36 | 8   | 11  | 743  | 81.7  | 7.68 |
| Q921M3   | Splicing factor 3B subunit 3 OS=Mus musculus GN=SF3b3 PE=2 SV=1 - [SF3B3_MOUSE]                                             | 24.73 | 2 | 27 | 27  | 107 | 1.244 | 0.981 | 0.855 | 0.870 | 312.87  | 24.73 | 44  | 107 | 1217 | 135.5 | 5.26 |
| Q5SV64   | Myosin-10 OS=Mus musculus GN=Myh10 PE=2 SV=1 - [Q5SV64_MOUSE]                                                               | 47.93 | 5 | 72 | 102 | 696 | 1.297 | 1.065 | 1.386 | 0.870 | 2008.88 | 47.93 | 175 | 696 | 2007 | 232.3 | 5.54 |
| Q8BL48-2 | Isoform 2 of RING finger protein unkempt homolog OS=Mus musculus GN=Unk - [UNK_MOUSE]                                       | 10.16 | 2 | 6  | 6   | 9   | 0.867 | 0.714 | 1.279 | 0.871 | 20.59   | 10.16 | 9   | 9   | 797  | 86.8  | 6.92 |
| Q8BGF7-4 | Isoform 4 of PAB-dependent poly(A)-specific ribonuclease subunit 2 OS=Mus musculus GN=Pan2 - [PAN2_MOUSE]                   | 2.23  | 4 | 2  | 2   | 4   | 0.514 | 1.070 | 0.887 | 0.871 | 2.29    | 2.23  | 2   | 4   | 1166 | 131.1 | 5.96 |
| Q3UHUS-3 | Isoform 3 of Protein SOGA2 OS=Mus musculus GN=Soga2 - [SOGA2_MOUSE]                                                         | 20.71 | 8 | 25 | 31  | 74  | 0.972 | 0.701 | 1.348 | 0.871 | 190.81  | 20.71 | 50  | 74  | 1893 | 208.0 | 6.18 |



|          |                                                                                                                |       |   |    |    |     |       |       |       |       |        |       |    |     |      |       |       |
|----------|----------------------------------------------------------------------------------------------------------------|-------|---|----|----|-----|-------|-------|-------|-------|--------|-------|----|-----|------|-------|-------|
| Q8VE65   | Transcription initiation factor TFIIID subunit 12<br>OS=Mus musculus<br>GN=Taf12 PE=1 SV=1 - [TAF12_MOUSE]     | 16.77 | 2 | 2  | 3  | 5   | 1.518 | 0.896 | 1.041 | 0.871 | 10.78  | 16.77 | 5  | 5   | 161  | 17.9  | 7.99  |
| A2A473   | Protein Tox2 OS=Mus musculus GN=Tox2 PE=2 SV=1 - [A2A473_MOUSE]                                                | 17.62 | 4 | 5  | 7  | 15  | 1.009 | 0.582 | 0.940 | 0.871 | 43.33  | 17.62 | 11 | 15  | 505  | 53.2  | 7.42  |
| Q9R059   | Four and a half LIM domains protein 3<br>OS=Mus musculus<br>GN=Fhl3 PE=2 SV=2 - [FHL3_MOUSE]                   | 13.84 | 2 | 3  | 3  | 14  | 1.632 | 1.725 | 0.890 | 0.871 | 57.71  | 13.84 | 6  | 14  | 289  | 31.8  | 6.20  |
| Q8CA71   | Protein shisa-4 OS=Mus musculus GN=Shisa4 PE=2 SV=1 - [SHSA4_MOUSE]                                            | 8.63  | 1 | 2  | 2  | 7   | 0.727 | 1.179 | 0.821 | 0.871 | 18.87  | 8.63  | 4  | 7   | 197  | 21.5  | 7.42  |
| Q9CYA6   | Zinc finger CCHC domain-containing protein 8<br>OS=Mus musculus<br>GN=Zcnc8 PE=2 SV=3 - [ZCHC8_MOUSE]          | 7.05  | 1 | 4  | 4  | 13  | 1.746 | 1.119 | 1.165 | 0.871 | 15.28  | 7.05  | 6  | 13  | 709  | 78.0  | 4.73  |
| D3Z2B4   | Xenotropic and polytropic retrovirus receptor 1<br>OS=Mus musculus<br>GN=Xpr1 PE=2 SV=1 - [D3Z2B4_MOUSE]       | 8.73  | 3 | 6  | 6  | 10  | 0.821 | 0.794 | 0.771 | 0.871 | 27.35  | 8.73  | 10 | 10  | 630  | 74.0  | 7.68  |
| O35926   | Cyclin-dependent kinase 5 activator 2 OS=Mus musculus GN=Cdk5r2 PE=3 SV=2 -                                    | 14.36 | 1 | 3  | 3  | 7   | 0.837 | 0.758 | 1.244 | 0.871 | 18.95  | 14.36 | 4  | 7   | 369  | 38.9  | 9.72  |
| Q6P5E4   | UDP-glucose:glycoprotein glucosyltransferase 1<br>OS=Mus musculus<br>GN=Uggt1 PE=1 SV=4 - [UGG1_MOUSE]         | 30.63 | 7 | 36 | 38 | 133 | 0.782 | 0.974 | 0.811 | 0.871 | 393.22 | 30.63 | 66 | 133 | 1551 | 176.3 | 5.62  |
| D3YV7    | Protein Nova2 OS=Mus musculus GN=Nova2 PE=4 SV=2 - [D3YV7_MOUSE]                                               | 40.45 | 2 | 9  | 16 | 81  | 1.160 | 1.293 | 0.998 | 0.871 | 257.40 | 40.45 | 31 | 81  | 492  | 49.0  | 8.16  |
| O08688   | Calpain-5 OS=Mus musculus GN=Capn5 PE=2 SV=1 - [CANS_MOUSE]                                                    | 41.25 | 3 | 23 | 23 | 63  | 0.700 | 0.702 | 0.766 | 0.871 | 195.91 | 41.25 | 34 | 63  | 640  | 72.9  | 7.36  |
| AZAH3    | Calmodulin-regulated spectrin-associated protein 1 OS=Mus musculus GN=Camsap1 PE=1 SV=1 - [CAMP1_MOUSE]        | 27.45 | 8 | 35 | 38 | 101 | 0.833 | 0.722 | 1.117 | 0.871 | 308.40 | 27.45 | 65 | 101 | 1581 | 175.8 | 6.95  |
| Q8BH27   | Multiple epidermal growth factor-like domains protein 9 OS=Mus musculus GN=Megf9 PE=2 SV=1 - [MEGF9_MOUSE]     | 8.00  | 1 | 5  | 5  | 16  | 0.852 | 1.397 | 1.206 | 0.871 | 40.62  | 8.00  | 10 | 16  | 600  | 62.8  | 5.47  |
| Q8CES0   | N-alpha-acetyltransferase 30 OS=Mus musculus GN=Naa30 PE=2 SV=2 - [NAA30_MOUSE]                                | 15.93 | 3 | 4  | 4  | 12  | 1.173 | 0.973 | 0.882 | 0.871 | 37.03  | 15.93 | 7  | 12  | 364  | 39.4  | 5.64  |
| Q3UVU3   | Zinc transporter 10 OS=Mus musculus GN=Slc30a10 PE=1 SV=1 - [ZNT10_MOUSE]                                      | 21.06 | 2 | 6  | 6  | 19  | 0.398 | 0.644 | 0.729 | 0.871 | 74.92  | 21.06 | 10 | 19  | 470  | 50.9  | 7.02  |
| POCG14   | Chromosome transmission fidelity protein 8 homolog isoform 2 OS=Mus musculus GN=Chtf8 PE=2 SV=1 - [CTF8_MOUSE] | 12.57 | 1 | 4  | 4  | 7   | 1.399 | 1.185 | 1.162 | 0.871 | 22.35  | 12.57 | 6  | 7   | 533  | 52.2  | 12.32 |
| Q8VEG6-3 | Isoform 3 of CCR4-NOT transcription complex subunit 6-like OS=Mus musculus GN=Cnot6l - [CNO6L_MOUSE]           | 4.83  | 4 | 3  | 3  | 3   | 1.335 | 0.780 | 0.780 | 0.871 | 7.31   | 4.83  | 3  | 3   | 435  | 49.4  | 6.30  |
| Q8K339   | DNA/RNA-binding protein KIN17 OS=Mus musculus GN=Kin PE=2 SV=1 - [KIN17_MOUSE]                                 | 8.95  | 1 | 3  | 4  | 7   | 1.185 | 0.823 | 0.773 | 0.871 | 17.32  | 8.95  | 7  | 7   | 391  | 44.7  | 9.04  |
| Q8BIL5   | Protein Hook homolog 1 OS=Mus musculus GN=Hook1 PE=1 SV=2 - [HOOK1_MOUSE]                                      | 21.43 | 2 | 15 | 15 | 44  | 1.298 | 1.431 | 1.089 | 0.871 | 113.05 | 21.43 | 25 | 44  | 728  | 84.4  | 5.22  |
| Q8R5H1   | Ubiquitin carboxyl-terminal hydrolase 15 OS=Mus musculus GN=Usp15 PE=2 SV=1 - [UBP15_MOUSE]                    | 40.06 | 3 | 2  | 28 | 68  | 0.906 | 1.337 | 1.250 | 0.871 | 201.66 | 40.06 | 42 | 68  | 981  | 112.3 | 5.17  |
| Q8BY71   | Histone acetyltransferase type B catalytic subunit OS=Mus musculus GN=Hat1 PE=2 SV=1 - [HAT1_MOUSE]            | 2.16  | 2 | 1  | 1  | 3   | 0.690 | 0.755 | 0.668 | 0.871 | 7.94   | 2.16  | 2  | 3   | 416  | 49.2  | 6.33  |
| Q62348   | Translin OS=Mus musculus GN=Tsn PE=1 SV=1 - [TSN_MOUSE]                                                        | 56.14 | 1 | 14 | 14 | 49  | 0.770 | 1.030 | 0.631 | 0.871 | 128.06 | 56.14 | 24 | 49  | 228  | 26.2  | 6.44  |
| Q9DBR3-2 | Isoform 2 of Armadillo repeat-containing protein 8 OS=Mus musculus GN=Armc8 - [ARMC8_MOUSE]                    | 33.33 | 2 | 2  | 12 | 38  | 0.947 | 1.179 | 0.844 | 0.871 | 93.71  | 33.33 | 20 | 38  | 399  | 44.4  | 7.21  |
| P28659-2 | Isoform 2 of CUGBP Elav-like family member 1 OS=Mus musculus GN=Celf1 -                                        | 17.01 | 4 | 6  | 8  | 23  | 1.077 | 1.292 | 1.043 | 0.871 | 70.89  | 17.01 | 13 | 23  | 482  | 51.6  | 8.47  |
| Q9D219   | B-cell CLL/lymphoma 9 protein OS=Mus musculus GN=Bcl9 PE=1 SV=3 - [BCL9_MOUSE]                                 | 9.33  | 1 | 9  | 11 | 23  | 1.411 | 1.153 | 1.001 | 0.872 | 56.78  | 9.33  | 15 | 23  | 1425 | 148.9 | 8.91  |

|          |                                                                                                                                 |       |    |    |    |     |       |       |       |       |        |       |    |     |      |       |      |
|----------|---------------------------------------------------------------------------------------------------------------------------------|-------|----|----|----|-----|-------|-------|-------|-------|--------|-------|----|-----|------|-------|------|
| Q91VE0   | Long-chain fatty acid transport protein 4<br>OS=Mus musculus<br>GN=Slc27a4 PE=1 SV=1 - [S27A4_MOUSE]                            | 34.37 | 1  | 20 | 21 | 73  | 0.829 | 0.695 | 0.814 | 0.872 | 220.92 | 34.37 | 36 | 73  | 643  | 72.3  | 8.59 |
| Q56A07   | Sodium channel subunit beta-2 OS=Mus musculus<br>GN=Scn2b PE=1 SV=1 - [SCN2B_MOUSE]                                             | 36.74 | 1  | 7  | 7  | 24  | 0.990 | 0.992 | 1.023 | 0.872 | 69.37  | 36.74 | 11 | 24  | 215  | 24.2  | 6.54 |
| Q571B6-3 | Isoform 3 of WASP homolog-associated protein with actin, membranes and microtubules OS=Mus musculus<br>GN=Whamm - [WHAMM_MOUSE] | 1.45  | 4  | 1  | 1  | 1   | 0.595 | 0.707 | 0.834 | 0.872 | 2.26   | 1.45  | 1  | 1   | 415  | 47.5  | 5.38 |
| Q99LM2   | CDK5 regulatory subunit-associated protein 3 OS=Mus musculus<br>GN=Cdk5rap3 PE=2 SV=1 [CK5P3_MOUSE]                             | 26.24 | 7  | 11 | 11 | 32  | 0.851 | 0.960 | 0.828 | 0.872 | 85.96  | 26.24 | 18 | 32  | 503  | 57.0  | 4.83 |
| Q3U285-2 | Isoform 2 of Ligand-dependent nuclear receptor corepressor-like protein OS=Mus musculus<br>GN=Lcor1 - [Lcor1_MOUSE]             | 2.90  | 2  | 1  | 1  | 1   | 1.189 | 1.416 | 0.966 | 0.872 | 2.13   | 2.90  | 1  | 1   | 517  | 57.3  | 7.93 |
| Q5EBG8   | Uncharacterized protein C1orf50 homolog OS=Mus musculus<br>PE=2 SV=1 - [CA050_MOUSE]                                            | 38.19 | 1  | 4  | 4  | 10  | 2.550 | 0.878 | 0.960 | 0.872 | 24.81  | 38.19 | 7  | 10  | 199  | 21.8  | 5.53 |
| Q8JZY2   | COMM domain-containing protein 10 OS=Mus musculus<br>GN=Commd10 PE=2 SV=1 - [COMDA_MOUSE]                                       | 25.74 | 1  | 5  | 5  | 10  | 1.157 | 1.462 | 0.881 | 0.872 | 29.84  | 25.74 | 9  | 10  | 202  | 22.8  | 6.65 |
| Q8C1A5   | Thimet oligopeptidase OS=Mus musculus<br>GN=Thop1 PE=1 SV=1 - [THOP1_MOUSE]                                                     | 44.25 | 1  | 32 | 32 | 131 | 1.574 | 1.115 | 0.778 | 0.872 | 345.73 | 44.25 | 56 | 131 | 687  | 78.0  | 6.06 |
| K3W4Q8   | Basigin OS=Mus musculus<br>GN=Bsg PE=4 SV=1 - [K3W4Q8_MOUSE]                                                                    | 41.74 | 3  | 2  | 8  | 47  | 0.650 | 1.052 | 0.781 | 0.872 | 124.11 | 41.74 | 12 | 47  | 218  | 24.1  | 5.36 |
| Q8R1B4   | Eukaryotic translation initiation factor 3 subunit C OS=Mus musculus<br>GN=EIF3c PE=1 SV=1 - [EIF3C_MOUSE]                      | 24.37 | 1  | 25 | 25 | 118 | 0.779 | 0.853 | 0.846 | 0.872 | 291.03 | 24.37 | 44 | 118 | 911  | 105.5 | 5.78 |
| P45591   | Cofilin-2 OS=Mus musculus<br>GN=Cif2 PE=1 SV=1 - [COF2_MOUSE]                                                                   | 83.13 | 1  | 10 | 16 | 231 | 2.161 | 0.625 | 0.892 | 0.872 | 567.53 | 83.13 | 26 | 231 | 166  | 18.7  | 7.88 |
| E0CZ16   | Kelch-like protein 3 OS=Mus musculus<br>GN=Klh3 PE=1 SV=2 - [KLHL3_MOUSE]                                                       | 10.90 | 3  | 3  | 5  | 8   | 0.785 | 1.492 | 1.013 | 0.872 | 28.02  | 10.90 | 8  | 8   | 587  | 64.9  | 5.60 |
| Q8VHL1   | Histone-lysine N-methyltransferase SETD7 OS=Mus musculus<br>GN=Setd7 PE=2 SV=2 - [SETD7_MOUSE]                                  | 51.64 | 1  | 14 | 14 | 81  | 1.743 | 0.822 | 1.399 | 0.872 | 251.18 | 51.64 | 25 | 81  | 366  | 40.5  | 4.65 |
| Q99N95   | 39S ribosomal protein L3, mitochondrial OS=Mus musculus<br>GN=Mrp3 PE=2 SV=1 - [RM03_MOUSE]                                     | 12.93 | 3  | 4  | 4  | 8   | 0.920 | 0.958 | 1.016 | 0.872 | 24.90  | 12.93 | 7  | 8   | 348  | 39.1  | 9.55 |
| F6R3J9   | Apoptotic chromatin condensation inducer in the nucleus (Fragment) OS=Mus musculus<br>GN=Acin1 PE=4 SV=1 - [Acin1_MOUSE]        | 18.71 | 12 | 12 | 23 | 72  | 1.331 | 0.700 | 1.053 | 0.873 | 174.75 | 18.71 | 38 | 72  | 1272 | 143.6 | 5.74 |
| Q9JKR6   | Hypoxia up-regulated protein 1 OS=Mus musculus<br>GN=Hyou1 PE=1 SV=1 - [Hyou1_MOUSE]                                            | 42.04 | 3  | 36 | 36 | 178 | 0.871 | 1.079 | 0.857 | 0.873 | 546.30 | 42.04 | 64 | 178 | 999  | 111.1 | 5.19 |
| Q99LM9   | Transcriptional adapter 1 OS=Mus musculus<br>GN=Tada1 PE=2 SV=1 - [TADA1_MOUSE]                                                 | 7.46  | 1  | 2  | 2  | 4   | 0.347 | 0.712 | 0.806 | 0.873 | 13.64  | 7.46  | 3  | 4   | 335  | 37.4  | 7.62 |
| P57776-3 | Isoform 3 of Elongation factor 1-delta OS=Mus musculus<br>GN=Eef1d - [EF1D_MOUSE]                                               | 50.76 | 7  | 3  | 28 | 235 | 1.762 | 0.812 | 0.925 | 0.873 | 776.55 | 50.76 | 49 | 235 | 660  | 72.9  | 6.43 |
| Q9WV91   | Prostaglandin F2 receptor negative regulator OS=Mus musculus<br>GN=Ptgfrn PE=1 SV=2 - [FPRP_MOUSE]                              | 14.11 | 1  | 12 | 12 | 32  | 0.700 | 0.705 | 0.909 | 0.873 | 84.04  | 14.11 | 19 | 32  | 879  | 98.7  | 6.61 |
| O35855   | Branched-chain-amino-acid aminotransferase, mitochondrial OS=Mus musculus<br>GN=Bcat2 PE=2 SV=2 - [BCAT2_MOUSE]                 | 21.37 | 4  | 7  | 7  | 36  | 1.217 | 1.555 | 0.897 | 0.873 | 107.77 | 21.37 | 12 | 36  | 393  | 44.1  | 8.29 |
| P21956-2 | Isoform 2 of Lactadherin OS=Mus musculus<br>GN=Mfge8 - [MFGM_MOUSE]                                                             | 24.41 | 2  | 9  | 9  | 23  | 1.053 | 2.524 | 0.824 | 0.873 | 52.01  | 24.41 | 16 | 23  | 426  | 47.1  | 7.05 |
| Q8CIE2-2 | Isoform 2 of Zinc finger MIZ domain-containing protein 2 OS=Mus musculus<br>GN=Zmiz2 - [ZMIZ2_MOUSE]                            | 5.86  | 5  | 2  | 2  | 3   | 0.814 | 1.085 | 0.792 | 0.873 | 5.35   | 5.86  | 3  | 3   | 888  | 93.8  | 7.14 |
| P27046   | Alpha-mannosidase 2 OS=Mus musculus<br>GN=Man2a1 PE=1 SV=2 - [MA2A1_MOUSE]                                                      | 4.17  | 1  | 4  | 4  | 16  | 0.994 | 1.399 | 0.752 | 0.873 | 53.37  | 4.17  | 6  | 16  | 1150 | 131.5 | 8.03 |
| Q61655   | ATP-dependent RNA helicase DDX19A OS=Mus musculus<br>GN=Ddx19a PE=2 SV=2 - [DD19A_MOUSE]                                        | 26.57 | 3  | 10 | 12 | 53  | 0.805 | 0.995 | 0.972 | 0.873 | 155.57 | 26.57 | 20 | 53  | 478  | 53.9  | 6.67 |

|          |                                                                                                                                     |       |   |    |    |     |       |       |       |       |        |       |    |     |      |       |       |
|----------|-------------------------------------------------------------------------------------------------------------------------------------|-------|---|----|----|-----|-------|-------|-------|-------|--------|-------|----|-----|------|-------|-------|
| Q9WVL3-2 | Isoform 2 of Solute carrier family 12 member 7<br>OS=Mus musculus<br>GN=Slc12a7 -                                                   | 6.74  | 2 | 6  | 8  | 17  | 2.245 | 1.844 | 0.768 | 0.873 | 28.13  | 6.74  | 10 | 17  | 1054 | 116.5 | 6.58  |
| Q62241   | U1 small nuclear ribonucleoprotein C<br>OS=Mus musculus<br>GN=Snrpc PE=2 SV=1 -                                                     | 24.53 | 1 | 3  | 3  | 27  | 1.488 | 1.053 | 1.204 | 0.873 | 71.18  | 24.53 | 6  | 27  | 159  | 17.4  | 9.67  |
| Q8R3V6   | CUE domain-containing protein 1 OS=Mus musculus GN=Cuedc1<br>PE=1 SV=2 -                                                            | 10.82 | 2 | 3  | 3  | 10  | 1.241 | 0.649 | 0.902 | 0.873 | 16.45  | 10.82 | 6  | 10  | 388  | 42.8  | 5.58  |
| G3X8Q1   | Calcineurin binding protein 1, isoform CRA_a OS=Mus musculus GN=Cabin1<br>PE=4 SV=1 -<br>[G3X8Q1_MOUSE]                             | 3.93  | 1 | 6  | 8  | 15  | 1.083 | 1.326 | 1.357 | 0.873 | 36.95  | 3.93  | 11 | 15  | 2187 | 243.0 | 6.01  |
| Q9CPS8   | Small membrane A-kinase anchor protein OS=Mus musculus PE=1 SV=1 -<br>[SMAKA_MOUSE]                                                 | 43.40 | 1 | 4  | 4  | 11  | 1.850 | 0.853 | 1.071 | 0.873 | 37.20  | 43.40 | 7  | 11  | 106  | 11.9  | 4.25  |
| Q9CQV4   | Protein FAM134C OS=Mus musculus GN=Fam134c<br>PE=2 SV=1 -<br>[F134C_MOUSE]                                                          | 10.52 | 2 | 3  | 5  | 22  | 0.865 | 0.796 | 0.963 | 0.873 | 53.97  | 10.52 | 8  | 22  | 466  | 51.6  | 4.97  |
| Q80UV9-2 | Isoform 2 of Transcription initiation factor TFIIID subunit 1 OS=Mus musculus GN=Taf1 -<br>[TAF1_MOUSE]                             | 0.97  | 4 | 1  | 1  | 1   | 0.725 | 0.926 | 0.951 | 0.873 | 0.00   | 0.97  | 1  | 1   | 929  | 105.7 | 5.07  |
| Q8VED2   | Biogenesis of lysosome-related organelles complex I subunit 4 OS=Mus musculus GN=Bioc1s4<br>PE=1 SV=1 -<br>[BIOC1S4_MOUSE]          | 21.40 | 1 | 4  | 4  | 5   | 1.304 | 1.356 | 0.950 | 0.873 | 10.74  | 21.40 | 5  | 5   | 215  | 23.1  | 5.14  |
| Q9Z1Z0   | General vesicular transport factor p115 OS=Mus musculus GN=Uso1 PE=1 SV=2 -<br>[USO1_MOUSE]                                         | 39.42 | 4 | 31 | 32 | 156 | 0.714 | 0.947 | 0.958 | 0.874 | 457.16 | 39.42 | 56 | 156 | 959  | 106.9 | 4.93  |
| F6XPV7   | Microtubule-associated protein (Fragment)<br>OS=Mus musculus<br>GN=Map4 PE=2 SV=1 -<br>[F6XPV7_MOUSE]                               | 32.00 | 2 | 1  | 2  | 9   | 0.521 | 0.348 | 0.966 | 0.874 | 22.07  | 32.00 | 4  | 9   | 75   | 8.0   | 10.58 |
| P03975   | IgE-binding protein<br>OS=Mus musculus<br>GN=Iap PE=2 SV=1 -<br>[IGEB_MOUSE]                                                        | 10.41 | 1 | 4  | 5  | 8   | 1.155 | 0.474 | 0.685 | 0.874 | 22.70  | 10.41 | 8  | 8   | 557  | 62.7  | 9.31  |
| A2AC80   | Metalloendopeptidase homolog PEX (Fragment)<br>OS=Mus musculus<br>GN=Phex PE=2 SV=1 -<br>[A2AC80_MOUSE]                             | 1.09  | 2 | 1  | 1  | 1   | 1.021 | 0.637 | 0.744 | 0.874 | 2.36   | 1.09  | 1  | 1   | 548  | 63.1  | 8.43  |
| F8VQC1   | Signal recognition particle subunit SRP72 OS=Mus musculus GN=Srp72 PE=2 SV=1 -<br>[F8VQC1_MOUSE]                                    | 30.85 | 2 | 16 | 17 | 65  | 0.858 | 0.856 | 0.845 | 0.874 | 161.08 | 30.85 | 30 | 65  | 671  | 74.6  | 9.23  |
| Q8BGT1   | Fibronectin leucine rich transmembrane protein 3<br>OS=Mus musculus<br>GN=Flrt3 PE=2 SV=1 -<br>[Q8BGT1_MOUSE]                       | 9.24  | 1 | 4  | 4  | 10  | 0.852 | 1.029 | 0.908 | 0.874 | 34.23  | 9.24  | 8  | 10  | 649  | 72.8  | 8.06  |
| Q5XJES   | RNA polymerase-associated protein LEO1<br>OS=Mus musculus<br>GN=Leo1 PE=1 SV=2 -                                                    | 5.10  | 1 | 3  | 3  | 7   | 0.917 | 0.768 | 1.031 | 0.874 | 15.67  | 5.10  | 4  | 7   | 667  | 75.6  | 4.46  |
| Q6NS60   | F-box only protein 41<br>OS=Mus musculus<br>GN=Fbxo41 PE=1 SV=3 -<br>[FBX41_MOUSE]                                                  | 29.32 | 1 | 21 | 21 | 63  | 0.655 | 1.035 | 1.132 | 0.874 | 186.38 | 29.32 | 34 | 63  | 873  | 94.3  | 8.24  |
| P55066   | Neurocan core protein<br>OS=Mus musculus<br>GN=Ncan PE=2 SV=1 -<br>[NCAN_MOUSE]                                                     | 25.32 | 1 | 28 | 29 | 197 | 1.648 | 1.273 | 1.502 | 0.874 | 657.77 | 25.32 | 57 | 197 | 1268 | 137.1 | 5.72  |
| Q80XU8   | Leucine-rich repeat and fibronectin type-III domain containing protein 4<br>OS=Mus musculus<br>GN=Lrfr4 PE=1 SV=1 -<br>[LRF4_MOUSE] | 17.14 | 1 | 8  | 8  | 21  | 1.044 | 1.040 | 0.887 | 0.874 | 77.86  | 17.14 | 13 | 21  | 636  | 67.2  | 6.81  |
| P70372   | ELAV-like protein 1<br>OS=Mus musculus<br>GN=Elavl1 PE=1 SV=2 -<br>[ELAV1_MOUSE]                                                    | 30.98 | 1 | 9  | 10 | 46  | 0.897 | 0.947 | 0.826 | 0.874 | 123.83 | 30.98 | 17 | 46  | 326  | 36.1  | 9.04  |
| P57080   | Ubiquitin carboxyl-terminal hydrolase 25 OS=Mus musculus GN=Usp25 PE=1 SV=2 -<br>[UBP25_MOUSE]                                      | 8.53  | 1 | 7  | 8  | 31  | 1.106 | 0.989 | 0.870 | 0.874 | 75.54  | 8.53  | 13 | 31  | 1055 | 121.3 | 5.31  |
| B0V2N1-4 | Isoform 4 of Receptor-type tyrosine-protein phosphatase 5 OS=Mus musculus GN=Ptpns -<br>[PTPRS_MOUSE]                               | 36.94 | 3 | 1  | 39 | 183 | 0.497 | 1.495 | 1.111 | 0.874 | 598.04 | 36.94 | 72 | 183 | 1497 | 167.8 | 6.81  |
| Q3U5C8   | Rho guanine nucleotide exchange factor 16<br>OS=Mus musculus<br>GN=Arhgef16 PE=1 SV=3 -<br>[ARHG_MOUSE]                             | 2.66  | 1 | 2  | 2  | 2   | 4.744 | 1.355 | 1.118 | 0.874 | 5.23   | 2.66  | 2  | 2   | 713  | 80.3  | 7.49  |
| O35566   | CD151 antigen OS=Mus musculus GN=Cd151<br>PE=2 SV=2 -<br>[CD151_MOUSE]                                                              | 9.09  | 1 | 2  | 2  | 4   | 0.897 | 0.797 | 0.813 | 0.874 | 11.38  | 9.09  | 3  | 4   | 253  | 28.2  | 7.47  |
| Q80TL0   | Protein phosphatase 1E<br>OS=Mus musculus<br>GN=Ppm1e PE=1 SV=2 -<br>[PPM1E_MOUSE]                                                  | 19.49 | 1 | 12 | 12 | 60  | 1.028 | 1.127 | 0.987 | 0.874 | 199.60 | 19.49 | 22 | 60  | 749  | 83.4  | 4.97  |

|          |                                                                                                                           |       |   |    |    |     |       |       |       |       |        |       |    |     |      |       |      |
|----------|---------------------------------------------------------------------------------------------------------------------------|-------|---|----|----|-----|-------|-------|-------|-------|--------|-------|----|-----|------|-------|------|
| Q6PGA2   | GTP-binding protein RAD<br>OS=Mus musculus<br>GN=Rrad PE=2 SV=1 -<br>[Q6PGA2_MOUSE]                                       | 6.19  | 2 | 1  | 1  | 4   | 0.934 | 1.474 | 0.513 | 0.874 | 16.21  | 6.19  | 2  | 4   | 307  | 33.2  | 9.26 |
| Q61129   | Complement factor I<br>OS=Mus musculus GN=Cfi<br>PE=1 SV=3 -<br>[CFAI_MOUSE]                                              | 7.79  | 1 | 4  | 4  | 6   | 3.033 | 1.523 | 0.860 | 0.874 | 20.82  | 7.79  | 6  | 6   | 603  | 67.2  | 7.46 |
| Q91YR7   | Pre-mRNA-processing<br>factor 6 OS=Mus musculus<br>GN=Ppfp6 PE=2 SV=1 -<br>[PRP6_MOUSE]                                   | 21.68 | 3 | 18 | 18 | 48  | 0.680 | 0.862 | 0.926 | 0.874 | 125.35 | 21.68 | 29 | 48  | 941  | 106.7 | 8.09 |
| P70414   | Sodium/calcium exchanger<br>1 OS=Mus musculus<br>GN=Slc8a1 PE=1 SV=1 -<br>[NACL1_MOUSE]                                   | 24.33 | 1 | 1  | 17 | 83  | 0.699 | 0.694 | 1.160 | 0.875 | 224.93 | 24.33 | 31 | 83  | 970  | 108.0 | 5.00 |
| Q99KK2   | N-acyleuraminase<br>cytidyltransferase<br>OS=Mus musculus<br>GN=Cmas PE=1 SV=2 -<br>[NEUA_MOUSE]                          | 44.91 | 2 | 16 | 17 | 72  | 0.520 | 0.571 | 0.678 | 0.875 | 212.32 | 44.91 | 33 | 72  | 432  | 48.0  | 8.10 |
| Q8CBY0   | Glutamyl-tRNA(Gln)<br>amidotransferase subunit<br>C, mitochondrial OS=Mus<br>musculus GN=Gatc PE=2<br>SV=1 - [GATC_MOUSE] | 42.58 | 1 | 5  | 5  | 16  | 1.970 | 1.075 | 1.338 | 0.875 | 45.84  | 42.58 | 10 | 16  | 155  | 16.7  | 5.16 |
| Q3UPF5-2 | Isoform 2 of Zinc finger<br>CCH-type antiviral protein<br>1 OS=Mus musculus<br>GN=Zc3hav1 -<br>[ZCCHV_MOUSE]              | 7.73  | 4 | 4  | 5  | 15  | 1.535 | 1.228 | 0.700 | 0.875 | 46.07  | 7.73  | 8  | 15  | 789  | 88.2  | 7.96 |
| Q61550   | Double-strand-break repair<br>protein rad21 homolog<br>OS=Mus musculus<br>GN=Rad21 PE=1 SV=3 -<br>[RAD21_MOUSE]           | 8.82  | 1 | 4  | 4  | 8   | 0.812 | 0.957 | 0.767 | 0.875 | 22.66  | 8.82  | 7  | 8   | 635  | 72.0  | 4.64 |
| E9Q5E1   | Protocadherin-19 OS=Mus<br>musculus GN=Pcdh19<br>PE=2 SV=1 -<br>[E9Q5E1_MOUSE]                                            | 12.85 | 5 | 13 | 14 | 43  | 0.965 | 1.351 | 0.822 | 0.875 | 120.20 | 12.85 | 25 | 43  | 1097 | 120.8 | 5.40 |
| Q8CJG0   | Protein argonaute-2<br>OS=Mus musculus<br>GN=Ago2 PE=1 SV=3 -<br>[AGO2_MOUSE]                                             | 32.67 | 1 | 17 | 25 | 65  | 0.986 | 1.027 | 0.730 | 0.875 | 189.83 | 32.67 | 40 | 65  | 860  | 97.2  | 9.19 |
| Q8C6B2-2 | Isoform 2 of Rhotekin<br>OS=Mus musculus<br>GN=Rtkn -<br>[RTKN_MOUSE]                                                     | 29.76 | 4 | 8  | 13 | 27  | 0.942 | 0.372 | 0.959 | 0.875 | 95.30  | 29.76 | 19 | 27  | 551  | 61.5  | 6.00 |
| Q9EP71   | Ankyrin OS=Mus<br>musculus GN=Rai14 PE=1<br>SV=1 - [RAI14_MOUSE]                                                          | 15.12 | 1 | 13 | 13 | 20  | 1.744 | 1.172 | 1.096 | 0.875 | 48.25  | 15.12 | 19 | 20  | 979  | 108.8 | 6.27 |
| Q8BK6    | Protein Hook homolog 3<br>OS=Mus musculus<br>GN=Hook3 PE=1 SV=2 -<br>[HOOK3_MOUSE]                                        | 39.69 | 2 | 27 | 29 | 165 | 1.582 | 0.983 | 1.047 | 0.875 | 454.65 | 39.69 | 53 | 165 | 718  | 83.2  | 5.19 |
| H3B326   | Homeobox protein cut-like<br>1 OS=Mus musculus<br>GN=Cux1 PE=2 SV=1 -<br>[H3B326_MOUSE]                                   | 22.84 | 7 | 1  | 9  | 35  | 1.007 | 0.650 | 0.727 | 0.875 | 94.14  | 22.84 | 13 | 35  | 543  | 61.6  | 5.17 |
| B8Q136   | Liprin-alpha 4 OS=Mus<br>musculus GN=Ppfa4 PE=2<br>SV=1 - [B8Q136_MOUSE]                                                  | 40.44 | 2 | 24 | 42 | 157 | 1.088 | 0.843 | 1.018 | 0.875 | 450.62 | 40.44 | 68 | 157 | 1187 | 133.6 | 6.27 |
| Q08093   | Calponin-2 OS=Mus<br>musculus GN=Cnn2 PE=2<br>SV=1 - [CWN2_MOUSE]                                                         | 23.61 | 2 | 5  | 8  | 16  | 1.050 | 2.056 | 0.650 | 0.875 | 43.65  | 23.61 | 13 | 16  | 305  | 33.1  | 7.62 |
| Q3UX43   | Ankyrin repeat domain-<br>containing protein 13C<br>OS=Mus musculus<br>GN=Ankr13c PE=2 SV=2<br>[AN13C_MOUSE]              | 2.40  | 1 | 1  | 1  | 3   | 1.679 | 1.048 | 0.896 | 0.875 | 6.01   | 2.40  | 2  | 3   | 541  | 60.1  | 6.90 |
| A2ANP1   | 2310028H24Rik protein<br>OS=Mus musculus<br>GN=Fam219a PE=2 SV=1 -<br>[A2ANP1_MOUSE]                                      | 25.60 | 3 | 3  | 3  | 9   | 1.457 | 1.020 | 1.191 | 0.875 | 24.86  | 25.60 | 5  | 9   | 168  | 18.6  | 4.70 |
| Q60692   | Proteasome subunit beta<br>type-6 OS=Mus musculus<br>GN=Psb6 PE=1 SV=3 -<br>[PSB6_MOUSE]                                  | 43.70 | 1 | 7  | 7  | 47  | 1.805 | 0.758 | 0.714 | 0.876 | 159.35 | 43.70 | 13 | 47  | 238  | 25.4  | 5.11 |
| Q3UM29   | Conserved oligomeric Golgi<br>complex subunit 7<br>OS=Mus musculus<br>GN=Cog7 PE=2 SV=1 -<br>[COG7_MOUSE]                 | 18.05 | 1 | 14 | 14 | 36  | 0.562 | 0.933 | 0.761 | 0.876 | 89.60  | 18.05 | 23 | 36  | 770  | 86.0  | 5.38 |
| F6UJZ3   | Protein Dgkk (Fragment)<br>OS=Mus musculus<br>GN=Dgkk PE=4 SV=1 -<br>[F6UJZ3_MOUSE]                                       | 2.82  | 2 | 2  | 3  | 3   | 1.192 | 0.949 | 0.785 | 0.876 | 7.61   | 2.82  | 3  | 3   | 1062 | 119.8 | 7.25 |
| Q9EPE9   | Probable cation-<br>transporting ATPase 13A1<br>OS=Mus musculus<br>GN=Atp13a1 PE=1 SV=2 -<br>[AT131_MOUSE]                | 11.50 | 1 | 11 | 11 | 28  | 0.802 | 0.935 | 0.814 | 0.876 | 67.22  | 11.50 | 20 | 28  | 1200 | 132.3 | 8.03 |
| P32507-2 | Isoform Alpha of Poliovirus<br>receptor-related protein 2<br>OS=Mus musculus<br>GN=Pvr2 -                                 | 14.35 | 2 | 4  | 4  | 17  | 1.131 | 1.110 | 0.820 | 0.876 | 51.14  | 14.35 | 8  | 17  | 467  | 50.7  | 5.48 |
| Q9CQE3   | 28S ribosomal protein S17,<br>mitochondrial OS=Mus<br>musculus GN=Mips17<br>PE=2 SV=1 -<br>[RT17_MOUSE]                   | 35.00 | 2 | 3  | 3  | 8   | 0.639 | 0.855 | 0.890 | 0.876 | 23.89  | 35.00 | 5  | 8   | 120  | 13.4  | 9.89 |
| Q80TRO   | MKIAA0827 protein<br>(Fragment) OS=Mus<br>musculus GN=Nfat5 PE=2<br>SV=1 - [Q80TRO_MOUSE]                                 | 4.45  | 1 | 1  | 3  | 7   | 2.282 | 1.171 | 1.049 | 0.876 | 18.18  | 4.45  | 5  | 7   | 1033 | 111.6 | 4.67 |

|          |                                                                                                                                         |       |   |    |    |     |       |       |       |       |        |       |     |     |      |       |       |
|----------|-----------------------------------------------------------------------------------------------------------------------------------------|-------|---|----|----|-----|-------|-------|-------|-------|--------|-------|-----|-----|------|-------|-------|
| O35085   | Homeobox protein ARX<br>OS=Mus musculus<br>GN=Arx PE=2 SV=3 -<br>[ARX_MOUSE]                                                            | 9.93  | 1 | 2  | 2  | 2   | 1.554 | 0.374 | 1.707 | 0.876 | 2.16   | 9.93  | 2   | 2   | 564  | 58.5  | 5.24  |
| D3Z0Z6   | Elongation of very long<br>chain fatty acids protein 5<br>(Fragment) OS=Mus<br>musculus GN=Elov5 PE=2<br>SV=1 - [D3Z0Z6_MOUSE]          | 8.45  | 3 | 1  | 1  | 4   | 0.727 | 0.539 | 0.662 | 0.876 | 7.41   | 8.45  | 2   | 4   | 71   | 8.3   | 9.25  |
| E9Q1U6   | CBP80/20-dependent<br>translation initiation factor<br>OS=Mus musculus<br>GN=Clif PE=4 SV=1 -<br>[E9Q1U6_MOUSE]                         | 18.62 | 3 | 11 | 11 | 22  | 0.840 | 0.746 | 0.755 | 0.876 | 57.49  | 18.62 | 17  | 22  | 623  | 70.2  | 6.61  |
| Q8K003   | Translation machinery-<br>associated protein 7<br>OS=Mus musculus<br>GN=Tma7 PE=2 SV=1 -<br>[TMA7_MOUSE]                                | 23.44 | 1 | 1  | 2  | 4   | 0.817 | 0.491 | 1.096 | 0.876 | 6.35   | 23.44 | 3   | 4   | 64   | 7.1   | 9.99  |
| F8WIA3   | Modulator of apoptosis 1<br>OS=Mus musculus<br>GN=Moap1 PE=2 SV=1 -<br>[F8WIA3_MOUSE]                                                   | 28.00 | 4 | 1  | 1  | 3   | 1.355 | 0.715 | 0.981 | 0.876 | 14.33  | 28.00 | 2   | 3   | 75   | 7.9   | 4.09  |
| Q8CHW4   | Translation initiation factor<br>eIF-2B subunit epsilon<br>OS=Mus musculus<br>GN=Ef2b5 PE=1 SV=1 -<br>[E12BE_MOUSE]                     | 13.95 | 1 | 8  | 8  | 25  | 0.876 | 0.824 | 0.836 | 0.876 | 80.63  | 13.95 | 13  | 25  | 717  | 80.0  | 5.07  |
| F7BE84   | Protein Ankrd50<br>(Fragment) OS=Mus<br>musculus GN=Ankrd50<br>PE=2 SV=1 -                                                              | 11.29 | 2 | 12 | 12 | 29  | 1.143 | 0.753 | 0.908 | 0.877 | 80.40  | 11.29 | 21  | 29  | 1390 | 150.8 | 6.47  |
| G5E8K5-2 | Isoform 2 of Ankyrin-3<br>OS=Mus musculus<br>GN=Ank3 -<br>[ANK3_MOUSE]                                                                  | 48.03 | 3 | 1  | 63 | 322 | 1.160 | 0.710 | 1.318 | 0.877 | 957.26 | 48.03 | 119 | 322 | 1726 | 188.1 | 7.75  |
| P62320   | Small nuclear<br>ribonucleoprotein Sm D3<br>OS=Mus musculus<br>GN=Snrpd3 PE=1 SV=1 -                                                    | 31.75 | 1 | 3  | 3  | 26  | 1.233 | 0.782 | 0.835 | 0.877 | 79.70  | 31.75 | 6   | 26  | 126  | 13.9  | 10.32 |
| Q8BJZ4   | 28S ribosomal protein S35,<br>mitochondrial OS=Mus<br>musculus GN=Mps35<br>PE=2 SV=2 -<br>[RT35_MOUSE]                                  | 20.63 | 1 | 5  | 5  | 12  | 0.986 | 0.676 | 0.932 | 0.877 | 34.95  | 20.63 | 8   | 12  | 320  | 36.0  | 8.59  |
| Q8VDP4   | DBIRD complex subunit<br>KIAA1967 homolog<br>OS=Mus musculus PE=1<br>SV=2 - [K1967_MOUSE]                                               | 32.97 | 1 | 22 | 22 | 74  | 0.859 | 0.850 | 0.809 | 0.877 | 213.65 | 32.97 | 38  | 74  | 922  | 102.9 | 5.25  |
| Q810J4   | Neuronal cell adhesion<br>molecule OS=Mus<br>musculus GN=Nrcam<br>PE=1 SV=2 -                                                           | 38.06 | 3 | 3  | 37 | 266 | 0.921 | 0.822 | 0.884 | 0.877 | 843.91 | 38.06 | 67  | 266 | 1256 | 138.4 | 5.91  |
| D3YU96   | Cytohesin-2 OS=Mus<br>musculus GN=Cyth2 PE=2<br>SV=1 - [D3YU96_MOUSE]                                                                   | 42.30 | 9 | 10 | 16 | 55  | 0.811 | 1.292 | 1.208 | 0.877 | 142.61 | 42.30 | 26  | 55  | 383  | 44.6  | 6.38  |
| Q99L17   | Cleavage stimulation factor<br>subunit 3 OS=Mus<br>musculus GN=Cstf3 PE=1<br>SV=1 - [CSTF3_MOUSE]                                       | 16.46 | 1 | 8  | 9  | 25  | 0.937 | 0.761 | 0.812 | 0.877 | 80.52  | 16.46 | 13  | 25  | 717  | 82.8  | 8.12  |
| Q3UVX5   | Metabotropic glutamate<br>receptor 5 OS=Mus<br>musculus GN=Grim5 PE=2<br>SV=2 - [GRM5_MOUSE]                                            | 28.35 | 3 | 2  | 32 | 117 | 0.476 | 1.975 | 1.758 | 0.877 | 320.89 | 28.35 | 50  | 117 | 1203 | 131.8 | 7.84  |
| Q058C3-2 | Isoform 2 of Echinoderm<br>microtubule-associated<br>protein-like 1 OS=Mus<br>musculus GN=Emil1 -<br>[EMAL1_MOUSE]                      | 31.67 | 5 | 22 | 24 | 124 | 1.159 | 0.382 | 0.798 | 0.877 | 312.84 | 31.67 | 44  | 124 | 783  | 86.4  | 7.46  |
| Q9JHU9   | Inositol-3-phosphate<br>synthase 1 OS=Mus<br>musculus GN=Iyna1<br>PE=2 SV=1 -                                                           | 28.37 | 1 | 13 | 13 | 56  | 1.422 | 2.151 | 0.842 | 0.877 | 152.51 | 28.37 | 21  | 56  | 557  | 60.9  | 6.42  |
| Q6A098   | Selenocysteine insertion<br>sequence-binding protein<br>2-like OS=Mus musculus<br>GN=Secisbp2l PE=1 SV=2<br>[SBP2L_MOUSE]               | 4.51  | 2 | 5  | 5  | 5   | 1.542 | 0.789 | 0.623 | 0.877 | 9.91   | 4.51  | 5   | 5   | 1086 | 119.6 | 6.35  |
| Q810C1   | SLIT and NTRK-like protein<br>1 OS=Mus musculus<br>GN=Slitrk1 PE=2 SV=1 -<br>[SLIK1_MOUSE]                                              | 6.47  | 2 | 4  | 4  | 7   | 0.974 | 1.679 | 0.995 | 0.877 | 16.81  | 6.47  | 5   | 7   | 696  | 77.8  | 6.49  |
| P57724   | Poly(rC)-binding protein 4<br>OS=Mus musculus<br>GN=Pcbp4 PE=2 SV=1 -<br>[PCBP4_MOUSE]                                                  | 18.86 | 1 | 4  | 5  | 17  | 0.838 | 0.388 | 0.767 | 0.877 | 59.84  | 18.86 | 9   | 17  | 403  | 41.4  | 8.34  |
| Q922L6   | Negative elongation factor<br>D OS=Mus musculus<br>GN=Nelfcd PE=2 SV=2 -<br>[NELFD_MOUSE]                                               | 7.28  | 2 | 3  | 3  | 9   | 1.624 | 1.397 | 0.795 | 0.877 | 25.09  | 7.28  | 5   | 9   | 591  | 66.2  | 5.16  |
| Q91WI7   | Integrin-alpha FG-GAP<br>repeat-containing protein 2<br>OS=Mus musculus<br>GN=Itfg2 PE=2 SV=1 -<br>[ITFG2_MOUSE]                        | 6.09  | 2 | 2  | 3  | 7   | 1.511 | 1.333 | 0.751 | 0.877 | 19.86  | 6.09  | 5   | 7   | 443  | 48.9  | 5.11  |
| E9Q7G0   | Protein Numa1 OS=Mus<br>musculus GN=Numa1<br>PE=2 SV=1 -<br>[E9Q7G0_MOUSE]                                                              | 35.39 | 1 | 41 | 65 | 207 | 1.266 | 1.096 | 0.942 | 0.877 | 552.62 | 35.39 | 113 | 207 | 2094 | 235.5 | 5.87  |
| D6RGR0   | Calpain-10 OS=Mus<br>musculus GN=Capn10<br>PE=2 SV=1 -<br>[D6RGR0_MOUSE]                                                                | 9.66  | 3 | 3  | 3  | 4   | 1.247 | 1.071 | 0.859 | 0.877 | 10.12  | 9.66  | 3   | 4   | 507  | 57.5  | 7.94  |
| P58158   | Galactosylgalactosylkosyl<br>protein 3-beta-<br>glucuronosyltransferase 3<br>OS=Mus musculus<br>GN=B3gal3 PE=2 SV=1 -<br>[B3GAL3_MOUSE] | 25.67 | 1 | 5  | 5  | 19  | 1.080 | 0.817 | 0.744 | 0.877 | 62.88  | 25.67 | 8   | 19  | 335  | 37.0  | 8.78  |

|          |                                                                                                       |       |   |    |    |     |        |       |       |       |        |       |    |     |      |       |       |
|----------|-------------------------------------------------------------------------------------------------------|-------|---|----|----|-----|--------|-------|-------|-------|--------|-------|----|-----|------|-------|-------|
| P55288   | Cadherin-11 OS=Mus musculus GN=Cdh11 PE=1 SV=1 - [CAD11_MOUSE]                                        | 32.41 | 4 | 17 | 17 | 57  | 1.314  | 0.944 | 1.087 | 0.877 | 173.35 | 32.41 | 29 | 57  | 796  | 88.1  | 4.89  |
| Q64449   | C-type mannosyl transferase 2 OS=Mus musculus GN=Mrc2 PE=1 SV=3 - [MRC2_MOUSE]                        | 3.72  | 2 | 5  | 5  | 9   | 0.871  | 3.318 | 0.577 | 0.877 | 29.23  | 3.72  | 7  | 9   | 1479 | 167.0 | 5.99  |
| D3YW42   | Coiled-coil domain-containing protein 9 OS=Mus musculus GN=Cdc9 PE=2 SV=2 - [D3YW42_MOUSE]            | 11.21 | 6 | 7  | 7  | 18  | 1.440  | 0.841 | 1.262 | 0.878 | 52.93  | 11.21 | 13 | 18  | 589  | 65.9  | 4.94  |
| E9PZF4   | Nebulin-related-anchoring protein OS=Mus musculus GN=Nrap PE=2 SV=1 - [E9PZF4_MOUSE]                  | 1.30  | 6 | 1  | 2  | 3   | 1.478  | 0.774 | 0.969 | 0.878 | 2.72   | 1.30  | 2  | 3   | 1692 | 191.8 | 9.28  |
| Q6BCL1   | PML-RARA-regulated adapter molecule 1 OS=Mus musculus GN=Pram1 PE=1 SV=2 - [PRAM_MOUSE]               | 1.33  | 1 | 1  | 1  | 1   | 0.782  | 0.645 | 1.360 | 0.878 | 2.17   | 1.33  | 1  | 1   | 675  | 75.5  | 9.63  |
| Q99LW6-2 | Isoform 2 of YY1-associated factor 2 OS=Mus musculus GN=Yaf2 - [YAF2_MOUSE]                           | 17.65 | 1 | 1  | 1  | 2   | 1.880  | 0.933 | 1.365 | 0.878 | 7.89   | 17.65 | 2  | 2   | 68   | 7.5   | 9.36  |
| Q91XD6   | Vacuolar protein-sorting-associated protein 36 OS=Mus musculus GN=Vps36 PE=1 SV=1 - [VPS36_MOUSE]     | 24.61 | 1 | 10 | 10 | 33  | 0.800  | 1.048 | 0.983 | 0.878 | 105.92 | 24.61 | 18 | 33  | 386  | 43.7  | 7.15  |
| Q8CI04   | Conserved oligomeric Golgi complex subunit 3 OS=Mus musculus GN=Cog3 PE=1 SV=3 - [COG3_MOUSE]         | 11.71 | 2 | 9  | 9  | 18  | 0.652  | 0.840 | 0.691 | 0.878 | 55.18  | 11.71 | 16 | 18  | 820  | 93.2  | 5.78  |
| Q9CZ7    | Serine hydroxymethyltransferase OS=Mus musculus GN=Shmt2 PE=2 SV=1 - [SHMT2_MOUSE]                    | 33.73 | 1 | 15 | 16 | 51  | 0.817  | 0.738 | 0.644 | 0.878 | 142.57 | 33.73 | 28 | 51  | 504  | 55.7  | 8.47  |
| G5E8L8   | Mitogen activated protein kinase kinase 2 OS=Mus musculus GN=Map3k2 PE=4 SV=1 - [G5E8L8_MOUSE]        | 2.58  | 2 | 2  | 2  | 3   | 0.978  | 1.231 | 1.030 | 0.878 | 6.78   | 2.58  | 3  | 3   | 619  | 69.6  | 8.32  |
| P62627   | Dynein light chain roadblock-type 1 OS=Mus musculus GN=Dynlrb1 PE=1 SV=3 - [DYNL1_MOUSE]              | 73.96 | 2 | 4  | 4  | 59  | 1.776  | 0.842 | 1.220 | 0.878 | 157.24 | 73.96 | 7  | 59  | 96   | 11.0  | 7.25  |
| P32848   | Parvalbumin alpha OS=Mus musculus GN=Pvalb PE=1 SV=3 - [PRVA_MOUSE]                                   | 76.36 | 1 | 10 | 10 | 31  | 2.894  | 0.810 | 1.565 | 0.878 | 83.76  | 76.36 | 17 | 31  | 110  | 11.9  | 5.19  |
| E9Q9K8   | Protein Akap6 OS=Mus musculus GN=Akap6 PE=2 SV=1 - [E9Q9K8_MOUSE]                                     | 4.20  | 1 | 10 | 11 | 22  | 1.575  | 1.110 | 0.978 | 0.878 | 47.41  | 4.20  | 16 | 22  | 2307 | 254.2 | 5.06  |
| Q8VD75   | Huntingtin-interacting protein 1 OS=Mus musculus GN=Hip1 PE=1 SV=2 - [HIP1_MOUSE]                     | 42.66 | 1 | 35 | 35 | 114 | 1.126  | 1.012 | 0.969 | 0.878 | 384.49 | 42.66 | 60 | 114 | 1029 | 115.1 | 5.43  |
| G3X934   | MCG115964 OS=Mus musculus GN=Wdr70 PE=4 SV=1 - [G3X934_MOUSE]                                         | 11.42 | 2 | 5  | 6  | 8   | 1.018  | 0.884 | 0.974 | 0.878 | 15.59  | 11.42 | 8  | 8   | 657  | 73.0  | 6.05  |
| P62754   | 40S ribosomal protein S6 OS=Mus musculus GN=Rps6 PE=1 SV=1 - [RS6_MOUSE]                              | 36.95 | 1 | 10 | 11 | 54  | 0.706  | 0.728 | 0.765 | 0.878 | 156.37 | 36.95 | 16 | 54  | 249  | 28.7  | 10.84 |
| J3QNB1   | La-related protein 1 OS=Mus musculus GN=Larp1 PE=4 SV=1 - [J3QNB1_MOUSE]                              | 25.19 | 2 | 20 | 21 | 76  | 1.406  | 0.886 | 1.154 | 0.878 | 193.89 | 25.19 | 31 | 76  | 1072 | 121.0 | 8.79  |
| Q61120   | SHC-transforming protein 3 OS=Mus musculus GN=Shc3 PE=1 SV=2 - [SHC3_MOUSE]                           | 40.72 | 1 | 14 | 14 | 63  | 0.763  | 1.005 | 1.117 | 0.878 | 211.23 | 40.72 | 25 | 63  | 474  | 52.1  | 7.30  |
| Q80WC1-2 | Isoform 2 of Ubiquitin-2 OS=Mus musculus GN=Ubn2 - [UBN2_MOUSE]                                       | 1.66  | 5 | 1  | 2  | 3   | 10.960 | 1.034 | 1.995 | 0.878 | 7.95   | 1.66  | 2  | 3   | 1203 | 130.7 | 9.26  |
| Q8C954   | Uncharacterized protein C10orf118 homolog OS=Mus musculus GN=C10g1 PE=2 SV=2 - [C1118_MOUSE]          | 15.27 | 2 | 12 | 13 | 30  | 1.195  | 0.707 | 1.016 | 0.878 | 79.71  | 15.27 | 20 | 30  | 917  | 104.8 | 5.53  |
| Q6PDS3   | Sterile alpha and TIR motif containing protein 1 OS=Mus musculus GN=Sarm1 PE=1 SV=1 - [SARM1_MOUSE]   | 31.35 | 4 | 18 | 19 | 43  | 0.658  | 1.043 | 0.912 | 0.878 | 126.98 | 31.35 | 29 | 43  | 724  | 79.6  | 6.27  |
| P53798   | Squalene synthase OS=Mus musculus GN=Fdft1 PE=2 SV=2 - [FDFT_MOUSE]                                   | 11.30 | 1 | 4  | 4  | 12  | 0.790  | 0.450 | 0.614 | 0.878 | 44.14  | 11.30 | 7  | 12  | 416  | 48.1  | 6.32  |
| O55042   | Alpha-synuclein OS=Mus musculus GN=Snca PE=1 SV=2 - [SYUA_MOUSE]                                      | 91.43 | 2 | 9  | 12 | 329 | 1.135  | 1.350 | 1.440 | 0.879 | 979.09 | 91.43 | 21 | 329 | 140  | 14.5  | 4.77  |
| Q8C7H1   | Methylmalonic aciduria type A homolog, mitochondrial OS=Mus musculus GN=Mmaa PE=2 SV=1 - [MMAA_MOUSE] | 24.58 | 1 | 10 | 10 | 23  | 0.821  | 1.016 | 0.853 | 0.879 | 41.28  | 24.58 | 15 | 23  | 415  | 45.9  | 9.32  |
| Q9R1P3   | Proteasome subunit beta type-2 OS=Mus musculus GN=Psmb2 PE=1 SV=1 - [PSB2_MOUSE]                      | 56.72 | 1 | 12 | 13 | 62  | 1.604  | 0.980 | 0.717 | 0.879 | 209.59 | 56.72 | 21 | 62  | 201  | 22.9  | 7.02  |

|          |                                                                                                               |       |   |    |    |     |       |       |       |       |        |       |    |     |      |       |      |
|----------|---------------------------------------------------------------------------------------------------------------|-------|---|----|----|-----|-------|-------|-------|-------|--------|-------|----|-----|------|-------|------|
| Q5F2D9   | Arrestin, beta 2 OS=Mus musculus GN=Arrb2 PE=4 SV=1 - [Q5F2D9_MOUSE]                                          | 7.88  | 3 | 2  | 3  | 11  | 1.500 | 1.053 | 0.815 | 0.879 | 30.49  | 7.88  | 5  | 11  | 406  | 45.7  | 7.83 |
| P28740-2 | Isoform 2 of Kinesin-like protein KIF2A OS=Mus musculus GN=Kif2a - [KIF2A_MOUSE]                              | 49.17 | 7 | 1  | 29 | 178 | 0.770 | 0.564 | 1.079 | 0.879 | 479.98 | 49.17 | 49 | 178 | 659  | 74.8  | 6.46 |
| P10126   | Elongation factor 1-alpha 1 OS=Mus musculus GN=Eef1a1 PE=1 SV=3 - [EF1A1_MOUSE]                               | 59.52 | 3 | 12 | 25 | 328 | 0.812 | 0.855 | 0.843 | 0.879 | 961.25 | 59.52 | 40 | 328 | 462  | 50.1  | 9.01 |
| Q8R4G0-8 | Isoform 1H of Netrin-G1 OS=Mus musculus GN=Ntng1 - [NTNG1_MOUSE]                                              | 15.07 | 9 | 1  | 6  | 20  | 0.546 | 1.373 | 1.089 | 0.879 | 59.14  | 15.07 | 12 | 20  | 438  | 50.1  | 6.46 |
| E9Q9E1   | Eukaryotic translation initiation factor 4 gamma 1 OS=Mus musculus GN=EIF4g1 PE=2 SV=1 - [E9Q9E1_MOUSE]       | 31.32 | 8 | 1  | 44 | 186 | 0.648 | 0.576 | 0.792 | 0.879 | 472.28 | 31.32 | 74 | 186 | 1593 | 175.2 | 5.38 |
| Q8VHM5   | Heterogeneous nuclear ribonucleoprotein R OS=Mus musculus GN=Hnrnp PE=2 SV=1 - [Q8VHM5_MOUSE]                 | 40.19 | 5 | 17 | 23 | 144 | 0.836 | 0.657 | 0.949 | 0.879 | 458.56 | 40.19 | 40 | 144 | 632  | 70.8  | 8.13 |
| Q9D1P0   | 39S ribosomal protein L13, mitochondrial OS=Mus musculus GN=Mppl3 PE=2 SV=1 - [RM13_MOUSE]                    | 38.76 | 3 | 7  | 7  | 24  | 0.767 | 0.831 | 0.861 | 0.879 | 72.58  | 38.76 | 13 | 24  | 178  | 20.7  | 9.35 |
| E9PXF0   | Protein Pcdh17 OS=Mus musculus GN=Pcdh17 PE=2 SV=1 - [E9PXF0_MOUSE]                                           | 31.03 | 1 | 28 | 28 | 100 | 1.090 | 1.085 | 0.811 | 0.879 | 324.33 | 31.03 | 48 | 100 | 1157 | 126.1 | 5.21 |
| Q9DC50   | Peroxisomal carnitine O-octanoyltransferase OS=Mus musculus GN=Crot PE=1 SV=1 - [OCTC_MOUSE]                  | 20.92 | 1 | 9  | 9  | 23  | 1.110 | 0.923 | 1.124 | 0.879 | 79.81  | 20.92 | 14 | 23  | 612  | 70.2  | 6.73 |
| Q9CRD0-2 | Isoform 2 of OCIA domain-containing protein 1 OS=Mus musculus GN=Ociad1 - [OCAD1_MOUSE]                       | 58.67 | 1 | 1  | 7  | 38  | 0.966 | 1.114 | 1.414 | 0.879 | 113.37 | 58.67 | 13 | 38  | 196  | 21.7  | 6.90 |
| Q91WM1   | Spermatid perinuclear RNA binding protein OS=Mus musculus GN=Strbp PE=1 SV=1 - [STRBP_MOUSE]                  | 31.55 | 4 | 13 | 18 | 45  | 0.651 | 0.693 | 0.816 | 0.879 | 96.86  | 31.55 | 28 | 45  | 672  | 73.7  | 8.72 |
| Q9DBR7   | Protein phosphatase 1 regulatory subunit 12A OS=Mus musculus GN=Ppp1r12a PE=1 SV=2 - [MYP11_MOUSE]            | 34.11 | 2 | 32 | 33 | 117 | 1.216 | 0.907 | 1.357 | 0.879 | 308.07 | 34.11 | 55 | 117 | 1029 | 114.9 | 5.49 |
| Q8VD13   | Vigilin OS=Mus musculus GN=Hdlbp PE=1 SV=1 - [VIGLN_MOUSE]                                                    | 44.40 | 1 | 49 | 50 | 163 | 1.150 | 0.793 | 0.871 | 0.879 | 443.03 | 44.40 | 81 | 163 | 1268 | 141.7 | 6.87 |
| O35226-2 | Isoform Rpn10B of 26S proteasome non-ATPase regulatory subunit 4 OS=Mus musculus GN=Psm4 - [RPN4_MOUSE]       | 32.72 | 4 | 3  | 12 | 89  | 1.538 | 0.917 | 1.321 | 0.879 | 274.85 | 32.72 | 22 | 89  | 379  | 41.0  | 4.79 |
| F6TLV3   | Fibronectin type-III domain-containing protein 3A (Fragment) OS=Mus musculus GN=Fn3a PE=4 SV=1 - [FN3A_MOUSE] | 20.28 | 3 | 16 | 16 | 33  | 0.917 | 0.991 | 0.755 | 0.880 | 94.36  | 20.28 | 22 | 33  | 1154 | 127.2 | 7.15 |
| G3UVU2   | Splicing factor 3A subunit 2 OS=Mus musculus GN=SF3a2 PE=4 SV=1 - [G3UVU2_MOUSE]                              | 8.66  | 3 | 4  | 4  | 12  | 0.822 | 0.586 | 0.817 | 0.880 | 36.48  | 8.66  | 7  | 12  | 485  | 51.2  | 9.64 |
| F6QZ23   | Intraflagellar transport protein 88 homolog (Fragment) OS=Mus musculus GN=If88 PE=4 SV=1 - [F6QZ23_MOUSE]     | 10.29 | 1 | 1  | 2  | 3   | 2.598 | 1.335 | 1.172 | 0.880 | 6.01   | 10.29 | 2  | 3   | 175  | 20.0  | 9.32 |
| F8WJK8   | Hsc70-interacting protein OS=Mus musculus GN=St13 PE=2 SV=1 - [F8WJK8_MOUSE]                                  | 37.29 | 5 | 16 | 16 | 135 | 1.062 | 0.557 | 1.048 | 0.880 | 366.86 | 37.29 | 30 | 135 | 362  | 40.5  | 5.30 |
| Q9ERA6   | Tuftelin-interacting protein 11 OS=Mus musculus GN=Ttip11 PE=1 SV=1 - [TFP11_MOUSE]                           | 13.84 | 2 | 9  | 11 | 31  | 0.532 | 0.728 | 0.705 | 0.880 | 85.98  | 13.84 | 18 | 31  | 838  | 96.2  | 5.90 |
| O88507   | Ciliary neurotrophic factor receptor subunit alpha OS=Mus musculus GN=Cnfr PE=1 SV=2 - [CNTFR_MOUSE]          | 26.88 | 3 | 9  | 9  | 37  | 1.348 | 0.931 | 0.892 | 0.880 | 103.41 | 26.88 | 15 | 37  | 372  | 40.8  | 6.83 |
| J3QNY8   | Uncharacterized protein OS=Mus musculus GN=Gm1985 PE=4 SV=1 - [J3QNY8_MOUSE]                                  | 2.62  | 1 | 1  | 1  | 1   | 2.982 | 1.496 | 1.095 | 0.880 | 2.59   | 2.62  | 1  | 1   | 420  | 49.6  | 6.14 |
| C3S7Q5   | Otoplano variant A OS=Mus musculus GN=Ofcc1 PE=2 SV=1 - [C3S7Q5_MOUSE]                                        | 5.08  | 1 | 2  | 2  | 4   | 1.336 | 0.988 | 1.092 | 0.880 | 7.10   | 5.08  | 3  | 4   | 926  | 105.0 | 6.54 |
| Q3UH68   | LIM and calponin homology domains-containing protein 1 OS=Mus musculus GN=Limch1 PE=1 SV=2 - [LIM1_MOUSE]     | 37.75 | 9 | 29 | 29 | 145 | 1.608 | 0.738 | 1.301 | 0.880 | 406.44 | 37.75 | 52 | 145 | 1057 | 118.1 | 5.48 |
| Q8BMP6   | Golgi resident protein GCP60 OS=Mus musculus GN=Acdb3 PE=1 SV=3 - [GCP60_MOUSE]                               | 28.57 | 1 | 9  | 9  | 59  | 0.957 | 0.742 | 0.786 | 0.880 | 155.70 | 28.57 | 16 | 59  | 525  | 60.1  | 5.11 |

|          |                                                                                                               |       |   |    |    |     |       |       |       |       |        |       |    |     |      |       |       |
|----------|---------------------------------------------------------------------------------------------------------------|-------|---|----|----|-----|-------|-------|-------|-------|--------|-------|----|-----|------|-------|-------|
| O88844   | Isocitrate dehydrogenase [NADP] cytoplasmic OS=Mus musculus GN=Idh1 PE=1 SV=2 - [IDHC_MOUSE]                  | 72.22 | 2 | 29 | 31 | 216 | 0.833 | 0.854 | 0.763 | 0.880 | 640.84 | 72.22 | 55 | 216 | 414  | 46.6  | 7.17  |
| Q810B7   | SLIT and NTRK-like protein 5 OS=Mus musculus GN=Slitrk5 PE=2 SV=1 - [SLIKS_MOUSE]                             | 12.54 | 3 | 10 | 10 | 24  | 0.809 | 1.539 | 1.084 | 0.880 | 66.86  | 12.54 | 16 | 24  | 957  | 107.1 | 6.93  |
| Q9Z266   | SNARE-associated protein Snapin OS=Mus musculus GN=Snapin PE=1 SV=1 - [SNAPN_MOUSE]                           | 42.65 | 2 | 5  | 5  | 13  | 1.392 | 1.408 | 0.993 | 0.881 | 44.15  | 42.65 | 8  | 13  | 136  | 14.9  | 9.31  |
| Q9D823   | 60S ribosomal protein L37 OS=Mus musculus GN=Rpl37 PE=2 SV=3 - [RL37_MOUSE]                                   | 28.87 | 1 | 5  | 5  | 11  | 0.615 | 1.046 | 0.748 | 0.881 | 25.11  | 28.87 | 7  | 11  | 97   | 11.1  | 11.74 |
| Q62415   | Apoptosis-stimulating of p53 protein 1 OS=Mus musculus GN=Ppp1r13b PE=1 SV=2 - [ASPP1_MOUSE]                  | 31.74 | 2 | 26 | 28 | 96  | 1.102 | 0.974 | 1.162 | 0.881 | 290.30 | 31.74 | 44 | 96  | 1087 | 119.1 | 6.68  |
| Q8CIN4   | Serine/threonine-protein kinase PAK 2 OS=Mus musculus GN=Pak2 PE=1 SV=1 - [PAK2_MOUSE]                        | 42.18 | 1 | 10 | 21 | 145 | 1.264 | 0.707 | 1.021 | 0.881 | 416.21 | 42.18 | 41 | 145 | 524  | 57.9  | 5.77  |
| Q9D8Z7   | Malignant T-cell-amplified sequence 1 OS=Mus musculus GN=Mct51 PE=2 SV=1 - [MCTS1_MOUSE]                      | 60.77 | 3 | 8  | 8  | 25  | 0.796 | 0.918 | 0.798 | 0.881 | 87.44  | 60.77 | 12 | 25  | 181  | 20.5  | 8.82  |
| G3XA57   | Protein Rab11fp2 OS=Mus musculus GN=Rab11fp2 PE=4 SV=1 - [G3XA57_MOUSE]                                       | 39.84 | 3 | 15 | 17 | 47  | 0.913 | 0.892 | 1.226 | 0.881 | 161.47 | 39.84 | 30 | 47  | 512  | 58.2  | 9.45  |
| P19426-2 | Isoform 2 of Negative elongation factor E OS=Mus musculus GN=Nelfe -                                          | 13.08 | 3 | 5  | 5  | 9   | 1.378 | 0.899 | 1.076 | 0.881 | 23.98  | 13.08 | 8  | 9   | 367  | 41.5  | 9.39  |
| G3UXZ5   | Proteasome activator complex subunit 1 (Fragment) OS=Mus musculus GN=Psme1 PE=2 SV=1 - [PSME1_MOUSE]          | 54.20 | 6 | 12 | 12 | 56  | 1.046 | 1.848 | 0.785 | 0.881 | 153.84 | 54.20 | 20 | 56  | 238  | 27.4  | 5.60  |
| Q9D1L9   | Ragulator complex protein LAMTOR5 OS=Mus musculus GN=Lamtor5 PE=2 SV=1 - [LTOR5_MOUSE]                        | 54.95 | 2 | 3  | 3  | 28  | 1.727 | 0.978 | 1.181 | 0.881 | 102.16 | 54.95 | 6  | 28  | 91   | 9.6   | 4.87  |
| O08810   | 116 kDa US small nuclear ribonucleoprotein component OS=Mus musculus GN=Eftud2 PE=2 SV=1 - [EFTUD2_MOUSE]     | 43.77 | 5 | 34 | 35 | 104 | 0.713 | 0.983 | 0.837 | 0.881 | 309.31 | 43.77 | 59 | 104 | 971  | 109.3 | 5.00  |
| Q08509   | Epidermal growth factor receptor kinase substrate 8 OS=Mus musculus GN=Eps8 PE=1 SV=2 - [EPS8_MOUSE]          | 41.05 | 4 | 26 | 26 | 67  | 1.111 | 0.975 | 0.950 | 0.881 | 167.35 | 41.05 | 43 | 67  | 821  | 91.7  | 7.65  |
| Q9D1B9   | 39S ribosomal protein L28, mitochondrial OS=Mus musculus GN=Mpl28 PE=2 SV=3 - [RM28_MOUSE]                    | 23.74 | 2 | 6  | 6  | 12  | 0.507 | 0.707 | 0.796 | 0.881 | 33.05  | 23.74 | 10 | 12  | 257  | 30.2  | 9.29  |
| Q9D0V7   | Receptor-binding cancer antigen expressed on SiSo cells OS=Mus musculus GN=Ebag9 PE=1 SV=2 - [RCAS1_MOUSE]    | 21.13 | 1 | 3  | 3  | 5   | 1.420 | 1.091 | 0.872 | 0.881 | 15.92  | 21.13 | 4  | 5   | 213  | 24.3  | 6.29  |
| Q6A051-3 | Isoform 3 of Attractin-like protein 1 OS=Mus musculus GN=Atm11 - [ATR11_MOUSE]                                | 3.43  | 3 | 3  | 3  | 6   | 0.984 | 1.101 | 1.255 | 0.881 | 12.22  | 3.43  | 4  | 6   | 787  | 87.2  | 7.88  |
| P0C027   | Diphosphoinositol polyphosphate phosphohydrolase 3-alpha OS=Mus musculus GN=Nudt10 PE=1 SV=1 - [NUDT10_MOUSE] | 36.59 | 1 | 3  | 5  | 33  | 1.214 | 1.267 | 0.778 | 0.881 | 90.35  | 36.59 | 9  | 33  | 164  | 18.6  | 5.69  |
| P32020   | Non-specific lipid-transfer protein OS=Mus musculus GN=Scp2 PE=1 SV=3 - [NLTP_MOUSE]                          | 40.22 | 4 | 23 | 23 | 109 | 1.603 | 0.823 | 0.972 | 0.881 | 320.56 | 40.22 | 39 | 109 | 547  | 59.1  | 7.44  |
| Q9WTP6-2 | Isoform 2 of Adenylylate kinase 2, mitochondrial OS=Mus musculus GN=Ak2 - [KAD2_MOUSE]                        | 47.84 | 3 | 11 | 11 | 55  | 0.958 | 0.781 | 0.732 | 0.882 | 159.41 | 47.84 | 20 | 55  | 232  | 25.6  | 7.42  |
| Q80TNS   | Palmitoyltransferase ZDHHC17 OS=Mus musculus GN=Zdhhc17 PE=1 SV=2 -                                           | 8.23  | 3 | 5  | 6  | 15  | 0.976 | 0.640 | 0.844 | 0.882 | 36.17  | 8.23  | 10 | 15  | 632  | 72.6  | 7.39  |
| P13864-2 | Isoform 2 of DNA (cytosine-5)-methyltransferase 1 OS=Mus musculus GN=Dnmt1 - [DNMT1_MOUSE]                    | 4.73  | 3 | 5  | 5  | 7   | 2.461 | 1.568 | 1.073 | 0.882 | 16.45  | 4.73  | 7  | 7   | 1502 | 169.9 | 7.69  |
| P33766   | Met-Leu-Phe receptor OS=Mus musculus GN=Fpr1 PE=2 SV=1 - [FPR1_MOUSE]                                         | 3.02  | 1 | 1  | 1  | 10  | 1.553 | 0.761 | 1.122 | 0.882 | 31.52  | 3.02  | 1  | 10  | 364  | 40.3  | 9.31  |
| P47939   | Regulated endocrine-specific protein 18 OS=Mus musculus GN=Resp18 PE=2 SV=1 - [RES18_MOUSE]                   | 10.86 | 1 | 2  | 2  | 4   | 1.177 | 0.814 | 0.535 | 0.882 | 6.88   | 10.86 | 3  | 4   | 175  | 19.5  | 8.91  |
| A2AWSS   | Histone deacetylase 5 OS=Mus musculus GN=Hdac5 PE=2 SV=1 - [A2AWSS_MOUSE]                                     | 19.81 | 7 | 9  | 16 | 49  | 1.415 | 1.185 | 1.178 | 0.882 | 98.86  | 19.81 | 27 | 49  | 1030 | 111.4 | 5.72  |



|          |                                                                                                                    |       |   |    |    |     |       |       |       |       |         |       |    |     |      |       |       |
|----------|--------------------------------------------------------------------------------------------------------------------|-------|---|----|----|-----|-------|-------|-------|-------|---------|-------|----|-----|------|-------|-------|
| Q8VDM4   | 26S proteasome non-ATPase regulatory subunit 2 OS=Mus musculus GN=Psm2 PE=1 SV=1 - [PSMD2_MOUSE]                   | 48.68 | 3 | 36 | 36 | 180 | 0.778 | 0.968 | 0.782 | 0.882 | 530.85  | 48.68 | 64 | 180 | 908  | 100.1 | 5.17  |
| Q9CX86   | Heterogeneous nuclear ribonucleoprotein A0 OS=Mus musculus GN=Hnrpa0 PE=1 SV=1 - [ROA0_MOUSE]                      | 32.46 | 1 | 5  | 7  | 59  | 0.817 | 0.782 | 0.890 | 0.882 | 175.28  | 32.46 | 13 | 59  | 305  | 30.5  | 9.31  |
| Q99F72-1 | Isoform 3 of Reticulon-4 OS=Mus musculus GN=Rtn4 - [RTN4_MOUSE]                                                    | 37.19 | 1 | 2  | 7  | 70  | 0.232 | 1.449 | 1.403 | 0.882 | 190.31  | 37.19 | 12 | 70  | 199  | 22.5  | 9.41  |
| Q9Z0P4-2 | Isoform 2 of Paralemmin-1 OS=Mus musculus GN=Paln - [PALM_MOUSE]                                                   | 57.52 | 1 | 1  | 18 | 306 | 0.761 | 1.428 | 0.975 | 0.882 | 788.53  | 57.52 | 32 | 306 | 339  | 36.7  | 4.84  |
| Q9DBR0   | A-kinase anchor protein 8 OS=Mus musculus GN=Akap8 PE=1 SV=1 - [AKAP8_MOUSE]                                       | 10.33 | 1 | 5  | 6  | 12  | 0.872 | 0.738 | 0.953 | 0.882 | 33.87   | 10.33 | 9  | 12  | 687  | 76.2  | 5.14  |
| E9Q452   | Tropomyosin alpha-1 chain OS=Mus musculus GN=Tpm1 PE=2 SV=1 - [E9Q452_MOUSE]                                       | 47.69 | 5 | 3  | 18 | 375 | 2.258 | 1.321 | 1.730 | 0.882 | 1073.15 | 47.69 | 31 | 375 | 281  | 32.5  | 4.77  |
| O08842   | GDNF family receptor alpha-2 OS=Mus musculus GN=Gfra2 PE=2 SV=1 - [GFRA2_MOUSE]                                    | 31.10 | 3 | 13 | 14 | 44  | 0.580 | 0.454 | 0.628 | 0.882 | 118.59  | 31.10 | 22 | 44  | 463  | 51.6  | 7.75  |
| Q0VBL3   | Protein Rbm15 OS=Mus musculus GN=Rbm15 PE=2 SV=1 - [Q0VBL3_MOUSE]                                                  | 18.71 | 1 | 12 | 15 | 37  | 0.686 | 0.702 | 0.884 | 0.882 | 114.37  | 18.71 | 21 | 37  | 962  | 105.7 | 10.08 |
| E9QPQ8   | 39S ribosomal protein L48, mitochondrial OS=Mus musculus GN=Mrp48 PE=2 SV=1 - [E9QPQ8_MOUSE]                       | 13.74 | 2 | 3  | 3  | 7   | 1.065 | 0.632 | 0.885 | 0.882 | 12.56   | 13.74 | 5  | 7   | 211  | 24.0  | 9.52  |
| Q8BFJ3-2 | Isoform 2 of RING finger protein 214 OS=Mus musculus GN=Rnf214 - [RN214_MOUSE]                                     | 34.49 | 3 | 1  | 18 | 70  | 1.297 | 0.665 | 0.708 | 0.882 | 200.68  | 34.49 | 32 | 70  | 548  | 61.2  | 8.15  |
| A2AIG3   | Exostosin-2 (Fragment) OS=Mus musculus GN=Ext2 PE=2 SV=1 - [A2AIG3_MOUSE]                                          | 18.78 | 3 | 2  | 2  | 4   | 0.762 | 0.921 | 0.920 | 0.883 | 11.00   | 18.78 | 3  | 4   | 213  | 24.0  | 8.53  |
| Q9CPRS   | 39S ribosomal protein L15, mitochondrial OS=Mus musculus GN=Mpl15 PE=1 SV=1 - [RM15_MOUSE]                         | 45.76 | 3 | 13 | 13 | 23  | 0.925 | 0.921 | 0.813 | 0.883 | 66.20   | 45.76 | 21 | 23  | 295  | 33.5  | 10.07 |
| D3Z5N2   | Stathmin OS=Mus musculus GN=Stmn1 PE=2 SV=1 - [D3Z5N2_MOUSE]                                                       | 43.54 | 3 | 7  | 10 | 321 | 1.770 | 1.123 | 1.474 | 0.883 | 875.30  | 43.54 | 18 | 321 | 147  | 17.0  | 9.09  |
| Q9CY97   | RNA polymerase II subunit A C-terminal domain phosphatase SSU72 OS=Mus musculus GN=Ssu72 PE=2 SV=1 - [SSU72_MOUSE] | 39.69 | 2 | 7  | 7  | 25  | 1.845 | 1.049 | 1.100 | 0.883 | 78.30   | 39.69 | 12 | 25  | 194  | 22.5  | 5.21  |
| Q8BZQ7   | Anaphase-promoting complex subunit 2 OS=Mus musculus GN=Anapc2 PE=1 SV=2 - [ANPC2_MOUSE]                           | 11.83 | 1 | 9  | 11 | 33  | 0.937 | 1.029 | 0.767 | 0.883 | 97.52   | 11.83 | 16 | 33  | 837  | 95.2  | 5.31  |
| E9QAQ7   | AT-rich interactive domain-containing protein 1A OS=Mus musculus GN=Arid1a PE=2 SV=1 - [E9QAQ7_MOUSE]              | 18.85 | 5 | 25 | 27 | 127 | 1.201 | 0.973 | 1.121 | 0.883 | 374.53  | 18.85 | 44 | 127 | 2287 | 242.5 | 6.71  |
| Q5UE59   | Kinesin light chain 1 OS=Mus musculus GN=Klc1 PE=2 SV=1 - [Q5UE59_MOUSE]                                           | 60.70 | 6 | 22 | 30 | 190 | 1.237 | 0.906 | 0.946 | 0.883 | 551.94  | 60.70 | 54 | 190 | 542  | 61.6  | 5.76  |
| P61963   | DBP1- and CUL4-associated factor 7 OS=Mus musculus GN=Dcaf7 PE=2 SV=1 - [RHO_MOUSE]                                | 29.82 | 1 | 9  | 9  | 63  | 1.382 | 1.099 | 0.528 | 0.883 | 177.39  | 29.82 | 17 | 63  | 342  | 38.9  | 5.52  |
| Q8BYP3   | Rho-related GTP-binding protein RhoF OS=Mus musculus GN=Rhof PE=2 SV=1 - [RHOF_MOUSE]                              | 14.22 | 1 | 2  | 2  | 6   | 1.004 | 1.178 | 0.811 | 0.883 | 18.96   | 14.22 | 4  | 6   | 211  | 23.6  | 8.43  |
| Q9JIA7   | Sphingosine kinase 2 OS=Mus musculus GN=Sphk2 PE=1 SV=2 - [SPHK2_MOUSE]                                            | 12.80 | 1 | 5  | 5  | 12  | 0.612 | 1.051 | 1.111 | 0.883 | 45.05   | 12.80 | 9  | 12  | 617  | 65.6  | 6.57  |
| Q8K1J5   | Protein SDE2 homolog OS=Mus musculus GN=Sde2 PE=1 SV=1 - [SDE2_MOUSE]                                              | 4.46  | 1 | 1  | 2  | 4   | 0.487 | 1.327 | 0.919 | 0.883 | 6.94    | 4.46  | 3  | 4   | 448  | 48.5  | 5.66  |
| Q8BGU2   | Cerebellin-2 OS=Mus musculus GN=Cbln2 PE=1 SV=1 - [CBLN2_MOUSE]                                                    | 12.50 | 1 | 2  | 3  | 14  | 1.105 | 0.776 | 0.766 | 0.883 | 31.40   | 12.50 | 6  | 14  | 224  | 24.0  | 8.18  |
| F7BX42   | Neuronal pentraxin receptor OS=Mus musculus GN=Npbr PE=2 SV=1 - [F7BX42_MOUSE]                                     | 43.61 | 2 | 15 | 16 | 92  | 1.116 | 4.374 | 1.498 | 0.883 | 247.51  | 43.61 | 28 | 92  | 493  | 52.3  | 6.13  |
| P17047   | Lysosome-associated membrane glycoprotein 2 OS=Mus musculus GN=Lamp2 PE=2 SV=2 - [LAMP2_MOUSE]                     | 5.78  | 3 | 3  | 3  | 9   | 1.321 | 1.082 | 0.812 | 0.883 | 21.55   | 5.78  | 5  | 9   | 415  | 45.7  | 7.39  |
| Q9D787   | Peptidyl-prolyl cis-trans isomerase-like 2 OS=Mus musculus GN=Ppil2 PE=2 SV=2 - [PPIL2_MOUSE]                      | 8.64  | 2 | 4  | 4  | 8   | 0.973 | 0.746 | 0.806 | 0.883 | 20.10   | 8.64  | 5  | 8   | 521  | 59.0  | 8.38  |

|          |                                                                                                                      |       |    |    |     |     |       |       |       |       |         |       |     |     |      |       |       |
|----------|----------------------------------------------------------------------------------------------------------------------|-------|----|----|-----|-----|-------|-------|-------|-------|---------|-------|-----|-----|------|-------|-------|
| Q9CQE7   | Endoplasmic reticulum-Golgi intermediate compartment protein 3 OS=Mus musculus GN=Ergic3 PE=2 SV=1 - [REMOVED_MOUSE] | 20.37 | 4  | 8  | 8   | 25  | 0.788 | 0.814 | 0.727 | 0.883 | 66.32   | 20.37 | 15  | 25  | 383  | 43.2  | 6.47  |
| Q9D1D4   | Transmembrane emp24 domain-containing protein 10 OS=Mus musculus GN=Tmed10 PE=2 SV=1 - [TMEDA_MOUSE]                 | 37.90 | 2  | 8  | 8   | 25  | 0.948 | 0.955 | 0.708 | 0.883 | 83.46   | 37.90 | 11  | 25  | 219  | 24.9  | 6.70  |
| Q8CIV2   | Membralin OS=Mus musculus GN=Mem259 PE=1 SV=2 - [MBRL_MOUSE]                                                         | 11.85 | 3  | 3  | 3   | 8   | 0.688 | 0.990 | 0.944 | 0.884 | 15.28   | 11.85 | 4   | 8   | 574  | 63.5  | 5.49  |
| B1AQW2   | Microtubule-associated protein tau OS=Mus musculus GN=Mapt PE=2 SV=1 - [B1AQW2_MOUSE]                                | 77.95 | 4  | 2  | 33  | 430 | 1.121 | 0.421 | 1.499 | 0.884 | 1223.40 | 77.95 | 56  | 430 | 390  | 40.9  | 9.64  |
| P57722-2 | Isoform 2 of Poly(r)-binding protein 3 OS=Mus musculus GN=Pcbp3 - [PCBP3_MOUSE]                                      | 47.84 | 4  | 6  | 13  | 124 | 0.700 | 0.885 | 0.774 | 0.884 | 394.73  | 47.84 | 25  | 124 | 370  | 39.1  | 7.52  |
| O54965   | E3 ubiquitin-protein ligase RNF13 OS=Mus musculus GN=Rnf13 PE=1 SV=2 - [RNF13_MOUSE]                                 | 12.34 | 2  | 4  | 4   | 5   | 1.820 | 0.892 | 0.727 | 0.884 | 15.56   | 12.34 | 5   | 5   | 381  | 42.7  | 5.06  |
| Q8C078   | Calcium/calmodulin-dependent protein kinase 2 OS=Mus musculus GN=Camkk2 PE=1 SV=2 - [CAMK2_MOUSE]                    | 38.78 | 5  | 18 | 18  | 57  | 0.773 | 1.362 | 1.464 | 0.884 | 183.86  | 38.78 | 28  | 57  | 588  | 64.6  | 5.90  |
| Q9CQF8   | Ribosomal protein 63, mitochondrial OS=Mus musculus GN=Mrp63 PE=2 SV=1 - [RT63_MOUSE]                                | 20.59 | 1  | 2  | 2   | 4   | 1.092 | 0.656 | 0.968 | 0.884 | 12.77   | 20.59 | 4   | 4   | 102  | 11.9  | 10.15 |
| Q6NXX2   | Zinc finger protein 532 OS=Mus musculus GN=Znf532 PE=2 SV=1 - [ZN532_MOUSE]                                          | 5.69  | 2  | 4  | 5   | 9   | 0.717 | 0.798 | 1.033 | 0.884 | 13.26   | 5.69  | 7   | 9   | 1036 | 110.9 | 8.29  |
| F8VPU2   | FERM, RhoGEF and pleckstrin domain-containing protein 1 OS=Mus musculus GN=Farp1 PE=1 SV=1 - [FARP1_MOUSE]           | 31.39 | 2  | 26 | 28  | 149 | 0.661 | 1.335 | 0.955 | 0.884 | 453.26  | 31.39 | 50  | 149 | 1048 | 118.8 | 7.88  |
| Q921Z5   | Tumor necrosis factor alpha-induced protein 8 OS=Mus musculus GN=Trifap8 PE=2 SV=1 - [TFIP8_MOUSE]                   | 22.73 | 11 | 4  | 4   | 11  | 0.930 | 1.586 | 0.765 | 0.884 | 34.73   | 22.73 | 7   | 11  | 198  | 22.9  | 7.93  |
| D3Z729   | Eukaryotic translation initiation factor 4E type 2 OS=Mus musculus GN=Eif4e2 PE=2 SV=1 - [D3Z729_MOUSE]              | 24.15 | 8  | 5  | 5   | 19  | 0.870 | 1.280 | 0.937 | 0.884 | 45.27   | 24.15 | 8   | 19  | 236  | 27.1  | 7.18  |
| Q99KW3-4 | Isoform 4 of TRIO and F-actin-binding protein OS=Mus musculus GN=Triobp -                                            | 8.74  | 9  | 9  | 11  | 27  | 1.309 | 1.167 | 0.929 | 0.884 | 53.95   | 8.74  | 18  | 27  | 1968 | 218.1 | 7.75  |
| Q80X41-2 | Isoform 2 of Serine/threonine-protein kinase VRK1 OS=Mus musculus GN=Vrk1 - [VRK1_MOUSE]                             | 9.60  | 4  | 3  | 3   | 5   | 0.621 | 0.666 | 1.038 | 0.884 | 11.22   | 9.60  | 5   | 5   | 396  | 45.0  | 8.98  |
| Q9EPB4   | Apoptosis-associated speck like protein containing a CARD OS=Mus musculus GN=Pycard PE=1 SV=1 - [ASC_MOUSE]          | 47.15 | 1  | 7  | 7   | 15  | 1.862 | 1.192 | 0.738 | 0.884 | 49.61   | 47.15 | 10  | 15  | 193  | 21.4  | 5.43  |
| Q9Z2G6   | Protein sel-1 homolog 1 OS=Mus musculus GN=Sel1l PE=2 SV=2 - [SE1L1_MOUSE]                                           | 13.54 | 3  | 8  | 8   | 31  | 0.928 | 1.033 | 0.766 | 0.884 | 126.99  | 13.54 | 14  | 31  | 790  | 88.3  | 5.57  |
| Q9CPX7   | 28S ribosomal protein S16, mitochondrial OS=Mus musculus GN=Mps16 PE=2 SV=1 - [RT16_MOUSE]                           | 25.19 | 1  | 3  | 3   | 16  | 1.008 | 0.879 | 0.963 | 0.884 | 43.35   | 25.19 | 6   | 16  | 135  | 15.2  | 9.67  |
| Q8C8N2   | Protein SCA1 OS=Mus musculus GN=Sca1 PE=1 SV=2 - [SCA1_MOUSE]                                                        | 43.23 | 3  | 21 | 21  | 111 | 0.496 | 1.005 | 0.897 | 0.884 | 332.89  | 43.23 | 39  | 111 | 606  | 70.2  | 8.60  |
| E9Q9B7   | Protein Kidins220 OS=Mus musculus GN=Kidins220 PE=2 SV=1 - [E9Q9B7_MOUSE]                                            | 23.42 | 1  | 33 | 33  | 105 | 1.065 | 0.892 | 0.884 | 0.884 | 285.44  | 23.42 | 56  | 105 | 1793 | 199.1 | 6.67  |
| G3UYC3   | RAS guanyl-releasing protein 1 OS=Mus musculus GN=Rasgrp1 PE=2 SV=1 -                                                | 8.82  | 5  | 4  | 4   | 8   | 0.679 | 1.165 | 1.203 | 0.885 | 31.62   | 8.82  | 6   | 8   | 760  | 86.5  | 7.96  |
| Q8BU11   | TOX high mobility group box family member 4 OS=Mus musculus GN=Tox4 PE=1 SV=3 - [TOX4_MOUSE]                         | 14.54 | 4  | 4  | 7   | 23  | 1.199 | 0.683 | 0.902 | 0.885 | 64.03   | 14.54 | 13  | 23  | 619  | 65.9  | 5.01  |
| F7ACR9   | Microtubule-actin cross-linking factor 1 (fragment) OS=Mus musculus GN=Madf1 PE=2 SV=1 - [F7ACR9_MOUSE]              | 46.97 | 4  | 2  | 217 | 907 | 1.752 | 1.240 | 0.972 | 0.885 | 2618.47 | 46.97 | 384 | 907 | 5333 | 607.9 | 5.40  |
| Q3KNZ4   | Avpr2 protein OS=Mus musculus GN=Avpr2 PE=2 SV=1 - [Q3KNZ4_MOUSE]                                                    | 11.88 | 1  | 1  | 1   | 3   | 1.792 | 1.013 | 0.576 | 0.885 | 5.35    | 11.88 | 1   | 3   | 160  | 17.4  | 8.31  |
| Q3U9R5   | Ficolin-2 OS=Mus musculus GN=Fcnb PE=2 SV=1 - [Q3U9R5_MOUSE]                                                         | 3.56  | 2  | 1  | 1   | 1   | 0.610 | 1.076 | 0.913 | 0.885 | 1.89    | 3.56  | 1   | 1   | 253  | 26.9  | 5.34  |

|          |                                                                                                                     |       |    |    |    |     |       |       |       |       |        |       |     |     |      |       |      |
|----------|---------------------------------------------------------------------------------------------------------------------|-------|----|----|----|-----|-------|-------|-------|-------|--------|-------|-----|-----|------|-------|------|
| P63028   | Translationally-controlled tumor protein OS=Mus musculus GN=Tpt1 PE=1 SV=1 - [TCTP_MOUSE]                           | 52.91 | 2  | 6  | 6  | 107 | 1.623 | 0.817 | 1.203 | 0.885 | 250.99 | 52.91 | 11  | 107 | 172  | 19.4  | 4.86 |
| E9Q865   | Serpin A9 (Fragment) OS=Mus musculus GN=Serpina9 PE=2 SV=1 - [E9Q865_MOUSE]                                         | 6.34  | 2  | 1  | 1  | 3   | 0.643 | 0.337 | 2.073 | 0.885 | 5.72   | 6.34  | 2   | 3   | 205  | 22.9  | 9.39 |
| Q991X3   | Golgi reassembly-stacking protein 2 OS=Mus musculus GN=Gorasp2 PE=1 SV=3 -                                          | 30.60 | 5  | 11 | 11 | 45  | 1.131 | 1.136 | 0.968 | 0.885 | 124.77 | 30.60 | 18  | 45  | 451  | 47.0  | 4.79 |
| F6YRX3   | Protein kinase domain-containing protein, cytoplasmic (Fragment) OS=Mus musculus GN=Pkdcc PE=4 SV=1 - [F6YRX_MOUSE] | 5.36  | 3  | 1  | 1  | 1   | 1.495 | 1.136 | 0.920 | 0.885 | 0.00   | 5.36  | 1   | 1   | 224  | 25.3  | 5.25 |
| Q62523   | Zyxin OS=Mus musculus GN=Zyx PE=1 SV=2 - [Zyx_MOUSE]                                                                | 30.67 | 1  | 14 | 14 | 165 | 2.191 | 1.307 | 1.212 | 0.885 | 260.27 | 30.67 | 25  | 165 | 564  | 60.5  | 6.40 |
| Q60994   | Adiponectin OS=Mus musculus GN=Adipoq PE=1 SV=2 - [ADIPQ_MOUSE]                                                     | 9.72  | 2  | 2  | 2  | 3   | 2.910 | 2.742 | 0.540 | 0.885 | 9.80   | 9.72  | 3   | 3   | 247  | 26.8  | 5.57 |
| E9Q9U5   | Protein Ildr2 OS=Mus musculus GN=Ildr2 PE=2 SV=1 - [E9Q9U5_MOUSE]                                                   | 33.43 | 1  | 19 | 19 | 60  | 0.603 | 1.395 | 0.992 | 0.885 | 166.32 | 33.43 | 35  | 60  | 661  | 73.2  | 7.68 |
| Q64514-2 | Isoform Short of Tripeptidyl-peptidase 2 OS=Mus musculus GN=Tpp2 -                                                  | 47.80 | 2  | 54 | 54 | 201 | 0.691 | 0.808 | 0.894 | 0.885 | 565.07 | 47.80 | 91  | 201 | 1249 | 138.4 | 6.38 |
| Q81ZQ9   | Eukaryotic translation initiation factor 3 subunit B OS=Mus musculus GN=EIF3b PE=1 SV=1 - [EIF3B_MOUSE]             | 32.38 | 1  | 22 | 22 | 110 | 0.905 | 0.968 | 0.861 | 0.885 | 346.95 | 32.38 | 40  | 110 | 803  | 91.3  | 5.02 |
| Q9WV55   | Vesicle-associated membrane protein-associated protein A OS=Mus musculus GN=Vapa PE=1 SV=2 - [VAPA_MOUSE]           | 45.78 | 1  | 15 | 16 | 130 | 0.692 | 0.935 | 0.922 | 0.886 | 305.65 | 45.78 | 28  | 130 | 249  | 27.8  | 8.40 |
| D3Z4S3   | Putative peptidyl-tRNA hydrolase PTRHD1 OS=Mus musculus GN=Pthrd1 PE=3 SV=1 - [PTRD1_MOUSE]                         | 39.29 | 1  | 5  | 5  | 16  | 1.453 | 0.967 | 1.166 | 0.886 | 50.19  | 39.29 | 8   | 16  | 140  | 16.0  | 9.32 |
| E9QLD2   | Myelin transcription factor 1-like protein OS=Mus musculus GN=Myt11 PE=2 SV=1 - [E9QLD2_MOUSE]                      | 4.81  | 13 | 4  | 4  | 9   | 0.943 | 1.532 | 1.224 | 0.886 | 21.54  | 4.81  | 6   | 9   | 1185 | 132.7 | 4.93 |
| Q499E5   | Storkhead-box protein 2 OS=Mus musculus GN=Stox2 PE=2 SV=2 - [STOX2_MOUSE]                                          | 9.40  | 3  | 6  | 6  | 13  | 1.754 | 1.275 | 1.468 | 0.886 | 26.08  | 9.40  | 8   | 13  | 926  | 102.7 | 8.46 |
| Q9QXC1   | Fetuin-B OS=Mus musculus GN=Fetub PE=1 SV=1 - [FETUB_MOUSE]                                                         | 14.18 | 2  | 4  | 4  | 14  | 3.773 | 1.682 | 0.537 | 0.886 | 46.96  | 14.18 | 8   | 14  | 388  | 42.7  | 6.61 |
| Q9CQR6   | Serine/threonine-protein phosphatase 6 catalytic subunit OS=Mus musculus GN=Ppp6c PE=2 SV=1 - [PPP6_MOUSE]          | 27.21 | 1  | 9  | 9  | 20  | 0.918 | 0.940 | 0.876 | 0.886 | 53.52  | 27.21 | 13  | 20  | 305  | 35.1  | 5.69 |
| P35413   | G-protein coupled receptor 3 OS=Mus musculus GN=Gpr3 PE=2 SV=1 - [GPR3_MOUSE]                                       | 9.70  | 1  | 1  | 1  | 1   | 0.794 | 2.938 | 0.822 | 0.886 | 0.00   | 9.70  | 1   | 1   | 330  | 35.4  | 7.72 |
| Q3TTL0   | Uncharacterized protein C3orf38 homolog OS=Mus musculus PE=2 SV=1 - [CC038_MOUSE]                                   | 11.49 | 1  | 2  | 3  | 7   | 1.226 | 0.977 | 1.019 | 0.886 | 19.90  | 11.49 | 4   | 7   | 348  | 39.5  | 6.20 |
| Q8BR92   | Paralemmin-2 OS=Mus musculus GN=Paln2 PE=1 SV=1 - [PALM2_MOUSE]                                                     | 52.66 | 2  | 8  | 16 | 105 | 1.100 | 0.878 | 0.988 | 0.886 | 305.85 | 52.66 | 28  | 105 | 376  | 42.1  | 5.15 |
| E9Q8N5   | CLIP-associating protein 2 OS=Mus musculus GN=Clasp2 PE=2 SV=1 - [E9Q8N5_MOUSE]                                     | 52.49 | 4  | 1  | 57 | 287 | 0.420 | 0.466 | 0.852 | 0.886 | 786.44 | 52.49 | 100 | 287 | 1286 | 140.6 | 8.63 |
| Q62192   | CD180 antigen OS=Mus musculus GN=Cd180 PE=1 SV=2 - [CD180_MOUSE]                                                    | 10.14 | 1  | 5  | 5  | 9   | 0.560 | 0.776 | 0.412 | 0.886 | 23.68  | 10.14 | 8   | 9   | 661  | 74.3  | 5.88 |
| F8WJ13   | Coiled-coil domain-containing protein 58 OS=Mus musculus GN=Ccdc58 PE=2 SV=1 - [F8WJ13_MOUSE]                       | 54.48 | 3  | 6  | 6  | 24  | 1.402 | 0.963 | 1.402 | 0.886 | 85.04  | 54.48 | 10  | 24  | 134  | 15.6  | 8.60 |
| Q8BVF2   | Phosducin-like protein 3 OS=Mus musculus GN=Pdc3 PE=1 SV=1 - [PDCL3_MOUSE]                                          | 24.17 | 1  | 6  | 6  | 15  | 1.198 | 1.132 | 0.768 | 0.886 | 42.38  | 24.17 | 10  | 15  | 240  | 27.6  | 4.72 |
| G3X911   | Sodium/calcium exchanger 1 OS=Mus musculus GN=Slc8a1 PE=4 SV=1 - [G3X911_MOUSE]                                     | 24.33 | 3  | 1  | 17 | 88  | 0.228 | 0.677 | 0.827 | 0.887 | 242.80 | 24.33 | 32  | 88  | 970  | 108.0 | 4.98 |
| A2BIE1   | Protein Qser1 OS=Mus musculus GN=Qser1 PE=4 SV=2 - [A2BIE1_MOUSE]                                                   | 1.59  | 1  | 2  | 2  | 5   | 2.965 | 1.260 | 1.087 | 0.887 | 9.95   | 1.59  | 2   | 5   | 1698 | 185.3 | 6.95 |
| Q6P9J9   | Anoctamin-6 OS=Mus musculus GN=Ano6 PE=1 SV=1 - [ANO6_MOUSE]                                                        | 8.67  | 1  | 6  | 6  | 13  | 0.785 | 1.503 | 0.693 | 0.887 | 42.19  | 8.67  | 10  | 13  | 911  | 106.2 | 6.76 |

|          |                                                                                                            |       |    |    |    |     |       |       |       |       |        |       |    |     |      |       |       |
|----------|------------------------------------------------------------------------------------------------------------|-------|----|----|----|-----|-------|-------|-------|-------|--------|-------|----|-----|------|-------|-------|
| Q3TAA7   | Serine/threonine-protein kinase 11-interacting protein OS=Mus musculus GN=Sk11ip PE=1 SV=1 - [S11IP_MOUSE] | 6.62  | 1  | 5  | 5  | 7   | 0.837 | 0.986 | 0.882 | 0.887 | 17.59  | 6.62  | 7  | 7   | 1072 | 117.9 | 4.96  |
| P10630   | Eukaryotic initiation factor 4A-II OS=Mus musculus GN=EIF4a2 PE=2 SV=2 - [IF4A2_MOUSE]                     | 69.78 | 6  | 13 | 28 | 193 | 0.574 | 0.904 | 0.829 | 0.887 | 568.86 | 69.78 | 49 | 193 | 407  | 46.4  | 5.48  |
| D3Z0K8   | Thioredoxin reductase 2, mitochondrial OS=Mus musculus GN=Txrd2 PE=2 SV=1 - [D3Z0K8_MOUSE]                 | 50.71 | 7  | 18 | 19 | 52  | 1.653 | 0.886 | 0.814 | 0.887 | 134.60 | 50.71 | 31 | 52  | 491  | 53.0  | 9.04  |
| Q8K1H7   | T-complex protein 11-like protein 2 OS=Mus musculus GN=Tcp11i2 PE=2 SV=1 - [TCP11I2_MOUSE]                 | 2.71  | 1  | 1  | 1  | 2   | 1.490 | 1.618 | 0.776 | 0.887 | 4.32   | 2.71  | 2  | 2   | 517  | 57.9  | 5.08  |
| Q9JH00   | Tropomodulin-3 OS=Mus musculus GN=Tmod3 PE=1 SV=1 - [TMOD3_MOUSE]                                          | 28.41 | 1  | 8  | 9  | 27  | 1.944 | 1.840 | 1.074 | 0.887 | 73.67  | 28.41 | 15 | 27  | 352  | 39.5  | 5.14  |
| Q9D1J1   | Adaptin ear-binding coat-associated protein 2 OS=Mus musculus GN=Ncap2 PE=1 SV=1 - [NECP2_MOUSE]           | 34.59 | 2  | 6  | 6  | 30  | 1.384 | 0.776 | 0.928 | 0.887 | 84.27  | 34.59 | 12 | 30  | 266  | 28.6  | 7.94  |
| Q9JLQ0   | CD2-associated protein OS=Mus musculus GN=Cd2ap PE=1 SV=3 - [CD2AP_MOUSE]                                  | 31.87 | 1  | 19 | 19 | 46  | 2.008 | 0.922 | 0.958 | 0.887 | 133.87 | 31.87 | 30 | 46  | 637  | 70.4  | 6.38  |
| G3UW40   | MCG4620, isoform CRA_b OS=Mus musculus GN=Mcc PE=4 SV=1 - [G3UW40_MOUSE]                                   | 15.70 | 2  | 9  | 10 | 18  | 1.025 | 0.956 | 1.368 | 0.887 | 57.82  | 15.70 | 14 | 18  | 828  | 92.8  | 5.48  |
| Q08481-3 | Isoform 3 of Platelet endothelial cell adhesion molecule OS=Mus musculus GN=Pecam1 - [PECA1_MOUSE]         | 13.55 | 6  | 7  | 7  | 12  | 1.143 | 1.223 | 0.892 | 0.887 | 31.22  | 13.55 | 9  | 12  | 716  | 80.0  | 6.89  |
| Q9EP72   | ER membrane protein complex subunit 7 OS=Mus musculus GN=Emc7 PE=2 SV=1 - [EMC7_MOUSE]                     | 24.48 | 1  | 4  | 4  | 12  | 0.598 | 0.604 | 0.804 | 0.887 | 28.56  | 24.48 | 6  | 12  | 241  | 26.3  | 9.23  |
| Q811Q9-2 | Isoform 2 of Choline-phosphate cytidylyltransferase B OS=Mus musculus GN=Pcyt1b - [PCYT1B_MOUSE]           | 28.91 | 2  | 5  | 9  | 22  | 1.494 | 1.094 | 0.965 | 0.887 | 58.97  | 28.91 | 13 | 22  | 339  | 38.7  | 7.55  |
| Q99N93   | 39S ribosomal protein L16, mitochondrial OS=Mus musculus GN=Mpl16 PE=2 SV=1 - [RM16_MOUSE]                 | 28.29 | 1  | 6  | 6  | 9   | 0.901 | 0.666 | 0.848 | 0.887 | 25.92  | 28.29 | 8  | 9   | 251  | 28.8  | 10.27 |
| E9PUC5   | PH and SEC7 domain-containing protein 3 OS=Mus musculus GN=Psd3 PE=2 SV=1 - [E9PUC5_MOUSE]                 | 44.41 | 2  | 1  | 17 | 117 | 0.519 | 0.984 | 1.678 | 0.887 | 297.01 | 44.41 | 31 | 117 | 376  | 42.3  | 9.60  |
| Q9DB24   | Protein Tcea16 OS=Mus musculus GN=Tcea16 PE=2 SV=1 - [Q9DB24_MOUSE]                                        | 27.00 | 1  | 1  | 6  | 68  | 1.040 | 0.473 | 1.887 | 0.887 | 183.44 | 27.00 | 11 | 68  | 200  | 22.6  | 5.55  |
| O70194   | Eukaryotic translation initiation factor 3 subunit D OS=Mus musculus GN=EIF3d PE=1 SV=2 - [EIF3D_MOUSE]    | 36.86 | 1  | 14 | 14 | 67  | 0.818 | 0.783 | 0.878 | 0.887 | 191.04 | 36.86 | 25 | 67  | 548  | 63.9  | 6.05  |
| B1AXZ4   | ELAV-like protein 2 OS=Mus musculus GN=Elav2 PE=2 SV=1 - [B1AXZ4_MOUSE]                                    | 48.97 | 10 | 6  | 17 | 107 | 0.808 | 0.559 | 0.683 | 0.887 | 297.57 | 48.97 | 31 | 107 | 388  | 42.5  | 9.04  |
| Q8BG10   | Lathosterol oxidase OS=Mus musculus GN=Sc5d PE=2 SV=1 - [Q8BG10_MOUSE]                                     | 2.68  | 1  | 1  | 1  | 2   | 0.982 | 0.490 | 0.796 | 0.887 | 4.58   | 2.68  | 1  | 2   | 299  | 35.0  | 8.75  |
| A2A7B5   | Protein Prdm2 OS=Mus musculus GN=Prdm2 PE=2 SV=1 - [A2A7B5_MOUSE]                                          | 3.34  | 1  | 4  | 5  | 17  | 1.342 | 1.032 | 0.984 | 0.887 | 45.60  | 3.34  | 7  | 17  | 1709 | 187.1 | 8.00  |
| Q91V01   | Lysophospholipid acyltransferase 5 OS=Mus musculus GN=Lpcat3 PE=1 SV=1 - [LPCAT3_MOUSE]                    | 4.52  | 2  | 2  | 2  | 3   | 0.944 | 1.158 | 0.800 | 0.887 | 8.38   | 4.52  | 3  | 3   | 487  | 56.1  | 8.56  |
| Q7TSY6-4 | Isoform 4 of CUGBP Elav-like family member 4 OS=Mus musculus GN=Celf4 - [CELF4_MOUSE]                      | 22.81 | 9  | 4  | 9  | 23  | 0.775 | 1.176 | 0.834 | 0.887 | 55.37  | 22.81 | 15 | 23  | 456  | 48.5  | 8.78  |
| Q5SFM8-2 | Isoform 2 of RNA-binding protein 27 OS=Mus musculus GN=Rbm27 - [RBM27_MOUSE]                               | 8.36  | 3  | 6  | 7  | 18  | 1.057 | 0.761 | 1.044 | 0.888 | 50.73  | 8.36  | 11 | 18  | 1005 | 112.6 | 9.13  |
| Q8K4Q8   | Collectin-12 OS=Mus musculus GN=Colec12 PE=1 SV=1 - [COL12_MOUSE]                                          | 8.89  | 1  | 6  | 7  | 9   | 2.025 | 2.674 | 0.832 | 0.888 | 26.31  | 8.89  | 8  | 9   | 742  | 81.3  | 5.49  |
| E9PVR3   | Acetylcholinesterase collagenic tail peptide OS=Mus musculus GN=Colq PE=2 SV=1 - [E9PVR3_MOUSE]            | 2.68  | 2  | 1  | 1  | 1   | 1.009 | 1.042 | 1.214 | 0.888 | 2.61   | 2.68  | 1  | 1   | 447  | 46.5  | 8.51  |
| Q8K4M5   | COMM domain-containing protein 1 OS=Mus musculus GN=Comm1 PE=2 SV=2 - [COMM1_MOUSE]                        | 27.66 | 4  | 4  | 5  | 16  | 1.548 | 1.043 | 0.744 | 0.888 | 47.30  | 27.66 | 9  | 16  | 188  | 21.0  | 7.59  |
| E9Q6R4   | Protein Arid1b OS=Mus musculus GN=Arid1b PE=2 SV=1 - [E9Q6R4_MOUSE]                                        | 12.84 | 3  | 21 | 22 | 71  | 1.275 | 0.970 | 1.168 | 0.888 | 203.48 | 12.84 | 38 | 71  | 2243 | 236.9 | 6.80  |

|          |                                                                                                                  |       |    |    |    |     |       |       |       |       |        |       |    |     |      |       |       |
|----------|------------------------------------------------------------------------------------------------------------------|-------|----|----|----|-----|-------|-------|-------|-------|--------|-------|----|-----|------|-------|-------|
| O88630   | Golgi SNAP receptor complex member 1<br>OS=Mus musculus<br>GN=Gors1 PE=1 SV=2 - [GOSR1_MOUSE]                    | 29.60 | 3  | 8  | 8  | 30  | 1.174 | 0.846 | 0.752 | 0.888 | 82.10  | 29.60 | 14 | 30  | 250  | 28.5  | 9.29  |
| H7BX26   | Centrosomal protein of 170 kDa OS=Mus musculus GN=Cep170 PE=2 SV=1 -                                             | 40.56 | 6  | 52 | 55 | 246 | 1.093 | 0.648 | 1.133 | 0.888 | 696.30 | 40.56 | 97 | 246 | 1578 | 173.8 | 7.20  |
| P58462-2 | Isoform 2 of Forkhead box protein P1 OS=Mus musculus GN=Foxp1 - [FOXP1_MOUSE]                                    | 7.02  | 13 | 2  | 2  | 3   | 0.678 | 0.669 | 1.272 | 0.888 | 18.15  | 7.02  | 3  | 3   | 641  | 71.5  | 6.25  |
| D6RH86   | Ribosomal protein S6 kinase beta-2 OS=Mus musculus GN=Rps6kb2 PE=2 SV=1 -                                        | 14.74 | 5  | 2  | 3  | 6   | 2.541 | 1.704 | 1.341 | 0.888 | 18.17  | 14.74 | 4  | 6   | 285  | 31.4  | 5.36  |
| Q3UIX4   | Protein Srsf11 OS=Mus musculus GN=Srsf11 PE=2 SV=1 - [Q3UIX4_MOUSE]                                              | 18.91 | 5  | 3  | 5  | 11  | 0.623 | 0.860 | 0.957 | 0.888 | 30.63  | 18.91 | 8  | 11  | 476  | 53.1  | 10.58 |
| Q6A0A9   | Constitutive coactivator of PPAR-gamma-like protein 1 OS=Mus musculus GN=FAM120A PE=1 SV=2 [F120A_MOUSE]         | 30.67 | 1  | 27 | 29 | 106 | 0.896 | 1.207 | 1.049 | 0.888 | 309.74 | 30.67 | 51 | 106 | 1112 | 121.6 | 8.92  |
| B2RXC2   | Inositol 1,4,5-trisphosphate 3-kinase B OS=Mus musculus GN=Itpkb PE=2 SV=1 - [B2RXC2_MOUSE]                      | 24.10 | 1  | 14 | 15 | 43  | 1.702 | 0.579 | 0.843 | 0.888 | 120.50 | 24.10 | 23 | 43  | 942  | 102.6 | 8.00  |
| Q8VDS7   | Centrosomal protein CEP57L1 OS=Mus musculus GN=Cep571 PE=2 SV=1 -                                                | 17.50 | 5  | 3  | 3  | 6   | 0.630 | 0.644 | 1.081 | 0.888 | 3.06   | 17.50 | 3  | 6   | 400  | 46.8  | 8.38  |
| Q9Z0L0   | Trophoblast glycoprotein OS=Mus musculus GN=Tpbg PE=1 SV=3 - [TPBG_MOUSE]                                        | 13.85 | 1  | 5  | 5  | 22  | 0.556 | 0.856 | 0.657 | 0.888 | 89.21  | 13.85 | 9  | 22  | 426  | 46.4  | 6.83  |
| Q8BVG4   | Dipeptidyl peptidase 9 OS=Mus musculus GN=Dpp9 PE=2 SV=2 - [DPP9_MOUSE]                                          | 23.32 | 2  | 14 | 16 | 46  | 0.656 | 0.995 | 1.012 | 0.888 | 137.29 | 23.32 | 28 | 46  | 862  | 97.9  | 6.65  |
| F8VPP8   | Protein Zc3h7b OS=Mus musculus GN=Zc3h7b PE=2 SV=1 - [F8VPP8_MOUSE]                                              | 12.73 | 1  | 12 | 12 | 23  | 0.768 | 0.925 | 0.821 | 0.888 | 61.54  | 12.73 | 18 | 23  | 982  | 110.2 | 7.42  |
| D3Z396   | Neurotrimin OS=Mus musculus GN=Ntm PE=2 SV=1 - [D3Z396_MOUSE]                                                    | 45.25 | 5  | 10 | 14 | 203 | 0.842 | 1.003 | 1.042 | 0.888 | 642.49 | 45.25 | 26 | 203 | 316  | 34.9  | 6.96  |
| Q9ET30   | Transmembrane 9 superfamily member 3 OS=Mus musculus GN=Tm9sf3 PE=1 SV=1 - [TM9S3_MOUSE]                         | 12.61 | 1  | 9  | 9  | 30  | 0.807 | 0.884 | 0.750 | 0.888 | 86.02  | 12.61 | 13 | 30  | 587  | 67.5  | 7.21  |
| Q5SPL2   | PHD finger protein 12 OS=Mus musculus GN=Phf12 PE=2 SV=1 - [PHF12_MOUSE]                                         | 1.40  | 1  | 1  | 1  | 1   | 9.223 | 4.165 | 1.090 | 0.888 | 2.11   | 1.40  | 1  | 1   | 1003 | 109.4 | 7.72  |
| Q8C6Y6-2 | Isoform 2 of Ankyrin repeat and SOCS box protein 14 OS=Mus musculus GN=Asb14 - [ASB14_MOUSE]                     | 3.46  | 3  | 1  | 1  | 2   | 0.404 | 1.535 | 1.866 | 0.888 | 4.54   | 3.46  | 1  | 2   | 433  | 48.3  | 8.57  |
| P99026   | Proteasome subunit beta type-4 OS=Mus musculus GN=Psb4 PE=1 SV=1 - [PSB4_MOUSE]                                  | 45.45 | 1  | 7  | 7  | 66  | 1.685 | 0.917 | 0.732 | 0.889 | 259.73 | 45.45 | 14 | 66  | 264  | 29.1  | 5.64  |
| Q19AB2   | ROBO2 isoform b OS=Mus musculus GN=Robo2 PE=2 SV=1 - [Q19AB2_MOUSE]                                              | 28.18 | 5  | 29 | 30 | 79  | 0.899 | 1.394 | 1.544 | 0.889 | 247.74 | 28.18 | 51 | 79  | 1508 | 165.3 | 6.28  |
| E9Q3A0   | E3 ubiquitin-protein ligase Trim36 OS=Mus musculus GN=Trim36 PE=2 SV=1 - [E9Q3A0_MOUSE]                          | 9.07  | 2  | 6  | 6  | 14  | 1.472 | 0.444 | 0.735 | 0.889 | 35.68  | 9.07  | 10 | 14  | 717  | 81.3  | 6.25  |
| E9Q9H2   | DnaJ homolog subfamily C member 2 OS=Mus musculus GN=Dnajc2 PE=2 SV=1 -                                          | 17.00 | 4  | 8  | 8  | 23  | 1.184 | 0.884 | 1.079 | 0.889 | 62.84  | 17.00 | 12 | 23  | 547  | 63.4  | 9.17  |
| Q9D2K6   | Protein D930007J09Rik OS=Mus musculus GN=D930007J09Rik PE=2 SV=1 - [Q9D2K6_MOUSE]                                | 5.34  | 1  | 1  | 1  | 2   | 1.104 | 1.172 | 0.677 | 0.889 | 4.52   | 5.34  | 1  | 2   | 131  | 13.6  | 12.13 |
| Q8BVU5   | ADP-ribose pyrophosphatase, mitochondrial OS=Mus musculus GN=Nudt9 PE=2 SV=1 - [NUDT9_MOUSE]                     | 26.29 | 5  | 9  | 9  | 27  | 1.381 | 0.960 | 1.088 | 0.889 | 74.59  | 26.29 | 15 | 27  | 350  | 38.6  | 6.76  |
| Q91VV3   | SH3 domain-binding glutamic acid-rich-like protein 3 OS=Mus musculus GN=Sh3bgrf3 PE=1 SV=1 - [Q91VV3_MOUSE]      | 51.61 | 2  | 6  | 6  | 137 | 1.925 | 1.136 | 1.498 | 0.889 | 398.77 | 51.61 | 12 | 137 | 93   | 10.5  | 5.14  |
| Q78WH7   | Calcium/calmodulin-dependent protein kinase II inhibitor 2 OS=Mus musculus GN=Camk2n2 PE=2 SV=1 - [Q78WH7_MOUSE] | 67.09 | 1  | 3  | 6  | 31  | 1.447 | 0.769 | 1.093 | 0.889 | 80.33  | 67.09 | 10 | 31  | 79   | 8.6   | 5.48  |
| Q6P9S0   | MTSS1-like protein OS=Mus musculus GN=Mtss1 PE=1 SV=1 - [MTSS1_MOUSE]                                            | 27.55 | 2  | 9  | 16 | 71  | 0.970 | 0.854 | 0.928 | 0.889 | 205.96 | 27.55 | 27 | 71  | 715  | 76.8  | 6.99  |
| Q77SK3-3 | Isoform 3 of Protocadherin 8 OS=Mus musculus GN=Pcdh8 - [PCDH8_MOUSE]                                            | 13.87 | 3  | 8  | 9  | 32  | 0.975 | 1.846 | 0.959 | 0.889 | 100.17 | 13.87 | 15 | 32  | 966  | 101.8 | 5.44  |

|          |                                                                                                         |       |   |    |    |     |       |       |       |       |        |       |    |     |      |       |      |
|----------|---------------------------------------------------------------------------------------------------------|-------|---|----|----|-----|-------|-------|-------|-------|--------|-------|----|-----|------|-------|------|
| Q3UVU8   | Disks large-associated protein 1 OS=Mus musculus GN=Dlgap1 PE=2 SV=1 -                                  | 36.32 | 1 | 1  | 18 | 72  | 0.819 | 1.525 | 1.778 | 0.889 | 186.91 | 36.32 | 24 | 72  | 636  | 70.6  | 5.58 |
| Q9BCZ4   | Selenoprotein S OS=Mus musculus GN=Wimp PE=2 SV=3 - [SELS_MOUSE]                                        | 25.26 | 1 | 3  | 3  | 7   | 0.656 | 0.871 | 0.712 | 0.889 | 19.73  | 25.26 | 5  | 7   | 190  | 21.5  | 9.39 |
| O70166   | Stathmin-3 OS=Mus musculus GN=Stmn3 PE=1 SV=1 - [STMN3_MOUSE]                                           | 30.00 | 1 | 7  | 7  | 38  | 1.102 | 0.862 | 0.923 | 0.889 | 76.82  | 30.00 | 13 | 38  | 180  | 20.9  | 7.49 |
| Q99PV8-3 | Isoform 3 of B-cell lymphoma/leukemia 11B OS=Mus musculus GN=Bcl11b - [BC11B_MOUSE]                     | 7.97  | 3 | 3  | 3  | 5   | 0.857 | 1.388 | 2.017 | 0.889 | 10.21  | 7.97  | 4  | 5   | 690  | 74.1  | 7.69 |
| P70288   | Histone deacetylase 2 OS=Mus musculus GN=Hdac2 PE=1 SV=1 - [HDAC2_MOUSE]                                | 24.80 | 2 | 4  | 10 | 37  | 0.987 | 1.047 | 0.942 | 0.889 | 103.76 | 24.80 | 17 | 37  | 488  | 55.3  | 5.91 |
| Q6P4T1   | Protein Snx19 OS=Mus musculus GN=Snx19 PE=2 SV=1 - [Q6P4T1_MOUSE]                                       | 11.63 | 1 | 9  | 9  | 17  | 0.854 | 0.740 | 0.954 | 0.889 | 49.37  | 11.63 | 13 | 17  | 997  | 109.7 | 5.12 |
| O35943   | Fratxin, mitochondrial OS=Mus musculus GN=Fxn PE=1 SV=1 - [FRDA_MOUSE]                                  | 20.29 | 1 | 5  | 5  | 13  | 1.813 | 0.932 | 1.079 | 0.889 | 36.19  | 20.29 | 8  | 13  | 207  | 22.9  | 8.02 |
| G3UW47   | Kinesin family member 1A OS=Mus musculus GN=Kif1a PE=3 SV=1 - [G3UW47_MOUSE]                            | 40.37 | 4 | 1  | 56 | 228 | 0.964 | 0.977 | 0.984 | 0.889 | 692.39 | 40.37 | 97 | 228 | 1697 | 191.7 | 6.20 |
| Q6PE01   | US small nuclear ribonucleoprotein 40 kDa protein OS=Mus musculus GN=Snmp40 PE=2 SV=1 - [SNR40_MOUSE]   | 32.96 | 1 | 6  | 6  | 29  | 1.046 | 0.796 | 0.898 | 0.889 | 85.70  | 32.96 | 10 | 29  | 358  | 39.3  | 8.10 |
| Q58A65-2 | Isoform 2 of C-Jun-amino-terminal kinase-interacting protein 4 OS=Mus musculus GN=Spag9 - [JIP4_MOUSE]  | 29.46 | 9 | 2  | 30 | 110 | 1.543 | 0.995 | 1.047 | 0.889 | 342.83 | 29.46 | 55 | 110 | 1307 | 144.6 | 5.15 |
| G3UZY2   | Thioredoxin (Fragment) OS=Mus musculus GN=Txn2 PE=3 SV=1 - [G3UZY2_MOUSE]                               | 52.31 | 4 | 3  | 3  | 12  | 1.545 | 1.099 | 1.371 | 0.890 | 39.33  | 52.31 | 4  | 12  | 130  | 14.2  | 5.81 |
| G5E893   | Ankyrin repeat domain 12, isoform CRA_a OS=Mus musculus GN=Ankrd12 PE=4 SV=1 - [G5E893_MOUSE]           | 2.94  | 3 | 5  | 5  | 6   | 1.214 | 1.011 | 1.006 | 0.890 | 12.40  | 2.94  | 6  | 6   | 2041 | 232.8 | 7.02 |
| Q6KAL4   | Multivesicular body subunit 12B OS=Mus musculus GN=Mvb12b PE=2 SV=2 - [MB12B_MOUSE]                     | 38.17 | 2 | 9  | 9  | 37  | 1.071 | 0.829 | 0.884 | 0.890 | 123.92 | 38.17 | 16 | 37  | 317  | 35.4  | 7.93 |
| Q6PAK3   | Protein arginine N-methyltransferase 8 OS=Mus musculus GN=Prmt8 PE=2 SV=2 - [ANM8_MOUSE]                | 30.71 | 1 | 9  | 12 | 34  | 1.027 | 1.325 | 1.104 | 0.890 | 90.29  | 30.71 | 17 | 34  | 394  | 45.2  | 6.93 |
| Q03157   | Amyloid-like protein 1 OS=Mus musculus GN=Aplp1 PE=1 SV=1 - [APLP1_MOUSE]                               | 28.94 | 1 | 18 | 18 | 76  | 1.490 | 0.969 | 1.222 | 0.890 | 225.91 | 28.94 | 31 | 76  | 653  | 72.7  | 5.67 |
| Q8R3I3   | Conserved oligomeric Golgi complex subunit 6 OS=Mus musculus GN=Cog6 PE=2 SV=2 - [COG6_MOUSE]           | 13.24 | 1 | 6  | 7  | 11  | 0.806 | 1.082 | 0.750 | 0.890 | 26.31  | 13.24 | 9  | 11  | 657  | 73.0  | 6.14 |
| Q9D2V7   | Coronin-7 OS=Mus musculus GN=Coro7 PE=2 SV=2 - [CORO7_MOUSE]                                            | 32.54 | 3 | 21 | 21 | 77  | 1.175 | 1.130 | 1.179 | 0.890 | 216.93 | 32.54 | 39 | 77  | 922  | 100.7 | 5.77 |
| Q99JA0   | Calcitonin gene-related peptide 1 OS=Mus musculus GN=Calca PE=2 SV=1 - [CALCA_MOUSE]                    | 14.06 | 2 | 1  | 1  | 6   | 2.963 | 0.736 | 1.213 | 0.890 | 21.27  | 14.06 | 2  | 6   | 128  | 14.1  | 6.09 |
| Q8VDV3-2 | Isoform 2 of Guanine nucleotide exchange factor for Rab-3A OS=Mus musculus GN=Rab3il1 - [R3GEF_MOUSE]   | 16.56 | 5 | 3  | 3  | 8   | 1.774 | 1.413 | 1.019 | 0.890 | 17.41  | 16.56 | 4  | 8   | 314  | 35.4  | 7.09 |
| Q6XUX1-3 | Isoform 3 of Dual serine/threonine and tyrosine protein kinase OS=Mus musculus GN=Dstyk - [DSTYK_MOUSE] | 4.47  | 4 | 4  | 4  | 7   | 0.384 | 0.451 | 0.840 | 0.890 | 22.37  | 4.47  | 5  | 7   | 918  | 103.8 | 6.54 |
| Q5PR69   | Uncharacterized protein KIAA1211 OS=Mus musculus GN=Kiaa1211 PE=2 SV=3 -                                | 23.61 | 5 | 22 | 22 | 76  | 1.187 | 0.627 | 0.892 | 0.890 | 212.38 | 23.61 | 38 | 76  | 1207 | 132.2 | 5.40 |
| Q3UHA3   | Spatacsin OS=Mus musculus GN=Spq11 PE=2 SV=3 - [SPTCS_MOUSE]                                            | 0.95  | 2 | 2  | 2  | 3   | 1.632 | 1.248 | 0.841 | 0.890 | 6.41   | 0.95  | 3  | 3   | 2430 | 273.8 | 5.94 |
| Q9D9K3   | Cell death regulator Aven OS=Mus musculus GN=Aven PE=1 SV=2 - [AVEN_MOUSE]                              | 21.05 | 3 | 6  | 6  | 16  | 1.561 | 0.803 | 1.114 | 0.890 | 44.79  | 21.05 | 11 | 16  | 342  | 37.2  | 4.98 |
| G3UZP2   | N6-adenosine-methyltransferase 70 kDa subunit OS=Mus musculus GN=Metb3 PE=2 SV=1 - [G3UZP2_MOUSE]       | 25.31 | 9 | 3  | 4  | 6   | 1.284 | 0.906 | 0.963 | 0.890 | 15.63  | 25.31 | 6  | 6   | 245  | 26.4  | 7.21 |
| E9PUI5   | Formin-binding protein 1-like OS=Mus musculus GN=Fnbp1l PE=2 SV=1 - [E9PUI5_MOUSE]                      | 35.14 | 4 | 16 | 18 | 72  | 1.089 | 1.007 | 1.065 | 0.890 | 197.91 | 35.14 | 30 | 72  | 609  | 70.4  | 6.73 |

|          |                                                                                                                          |       |   |    |    |     |       |       |       |       |        |       |    |     |      |       |       |
|----------|--------------------------------------------------------------------------------------------------------------------------|-------|---|----|----|-----|-------|-------|-------|-------|--------|-------|----|-----|------|-------|-------|
| O09110-2 | Isoform 1 of Dual specificity mitogen-activated protein kinase kinase 3 OS=Mus musculus GN=Map2k3 - [MAP2K3_MOUSE]       | 9.87  | 2 | 1  | 3  | 8   | 0.596 | 1.036 | 0.590 | 0.890 | 21.49  | 9.87  | 6  | 8   | 314  | 35.8  | 6.25  |
| Q91YE7-2 | Isoform 2 of RNA-binding protein 5 OS=Mus musculus GN=Rbm5 - [RBMS_MOUSE]                                                | 13.76 | 2 | 7  | 10 | 28  | 1.558 | 0.767 | 1.021 | 0.890 | 74.87  | 13.76 | 16 | 28  | 814  | 92.2  | 6.21  |
| P24547   | Inosine-5'-monophosphate dehydrogenase 2 OS=Mus musculus GN=Impdh2 PE=1 SV=2 - [IMDH2_MOUSE]                             | 40.66 | 1 | 18 | 20 | 70  | 1.627 | 0.953 | 0.713 | 0.890 | 209.00 | 40.66 | 35 | 70  | 514  | 55.8  | 7.28  |
| Q9WV19   | Cytochrome P450, family 2, subfamily g, polypeptide 1 OS=Mus musculus GN=Cyp2g1 PE=2 SV=1 - [Q9WV19_MOUSE]               | 6.48  | 1 | 2  | 2  | 2   | 0.386 | 0.540 | 0.902 | 0.890 | 1.91   | 6.48  | 2  | 2   | 494  | 56.8  | 8.75  |
| D3YTU7   | Suppressor of IKKBE 1 OS=Mus musculus GN=Siik1 PE=2 SV=1 - [D3YTU7_MOUSE]                                                | 37.10 | 2 | 4  | 4  | 14  | 1.555 | 1.068 | 1.312 | 0.890 | 36.91  | 37.10 | 8  | 14  | 124  | 13.8  | 5.05  |
| Q8CGC7   | Bifunctional glutamate/proline-tRNA ligase OS=Mus musculus GN=Eprs PE=1 SV=4 - [SYEP_MOUSE]                              | 43.19 | 2 | 52 | 55 | 209 | 0.700 | 0.796 | 0.893 | 0.891 | 591.34 | 43.19 | 94 | 209 | 1512 | 170.0 | 7.66  |
| Q64704-5 | Isoform 3D-1 of Syntaxin-3 OS=Mus musculus GN=Sbx3 - [STX3_MOUSE]                                                        | 13.84 | 6 | 3  | 4  | 8   | 1.799 | 2.148 | 1.121 | 0.891 | 21.88  | 13.84 | 6  | 8   | 289  | 33.2  | 5.35  |
| D3YZ20   | DNA-directed RNA polymerase II subunit RPB11 OS=Mus musculus GN=Polr2j PE=2 SV=1 - [D3YZ20_MOUSE]                        | 22.52 | 4 | 3  | 3  | 6   | 0.788 | 1.171 | 0.964 | 0.891 | 19.05  | 22.52 | 4  | 6   | 111  | 12.6  | 6.77  |
| P31230   | Aminoacyl tRNA synthase complex-interacting multifunctional protein 1 OS=Mus musculus GN=Aimp1 PE=1 SV=2 - [AIMP1_MOUSE] | 71.61 | 2 | 15 | 15 | 94  | 1.206 | 0.850 | 1.042 | 0.891 | 269.13 | 71.61 | 27 | 94  | 310  | 34.0  | 8.35  |
| Q8K135   | Dyslexia-associated protein KIAA0319-like protein OS=Mus musculus GN=Kiaa0319l PE=1 SV=1 - [K319L_MOUSE]                 | 10.02 | 5 | 9  | 10 | 19  | 1.058 | 1.284 | 0.995 | 0.891 | 40.95  | 10.02 | 18 | 19  | 1048 | 115.2 | 6.16  |
| F6Y0D0   | Protein 1110008J03Rik (Fragment) OS=Mus musculus GN=1110008J03Rik PE=2 SV=1 - [F6Y0D0_MOUSE]                             | 8.79  | 4 | 1  | 1  | 1   | 1.275 | 0.895 | 1.131 | 0.891 | 2.24   | 8.79  | 1  | 1   | 91   | 10.2  | 10.96 |
| B2RT44   | LON peptidase N-terminal domain and ring finger 2 OS=Mus musculus GN=Lonf2 PE=2 SV=1 - [B2RT44_MOUSE]                    | 11.97 | 1 | 5  | 5  | 10  | 0.760 | 1.026 | 0.846 | 0.891 | 28.97  | 11.97 | 8  | 10  | 518  | 58.4  | 5.31  |
| D3YZ24   | TSC22 domain family protein 4 OS=Mus musculus GN=Tsc22d4 PE=2 SV=1 - [TSC22D4_MOUSE]                                     | 46.43 | 2 | 2  | 7  | 45  | 1.556 | 0.636 | 0.999 | 0.891 | 114.07 | 46.43 | 12 | 45  | 168  | 17.6  | 8.51  |
| P52734   | FYVE, RhoGEF and PH domain-containing protein 1 OS=Mus musculus GN=Fgd1 PE=1 SV=2 - [FGD1_MOUSE]                         | 12.92 | 2 | 8  | 8  | 15  | 1.032 | 0.900 | 0.915 | 0.891 | 44.59  | 12.92 | 13 | 15  | 960  | 106.3 | 6.58  |
| P47708   | Rabphilin-3A OS=Mus musculus GN=Rph3a PE=1 SV=2 - [RP3A_MOUSE]                                                           | 53.74 | 1 | 31 | 33 | 233 | 1.082 | 0.608 | 1.169 | 0.891 | 766.71 | 53.74 | 58 | 233 | 681  | 75.4  | 8.27  |
| Q5QD14   | Trace amine-associated receptor 5 OS=Mus musculus GN=Taar5 PE=2 SV=1 - [TAAR5_MOUSE]                                     | 3.26  | 1 | 1  | 1  | 1   | 0.484 | 0.815 | 0.676 | 0.891 | 2.30   | 3.26  | 1  | 1   | 337  | 38.2  | 8.35  |
| Q3UHC1   | Protein Rapgef1 OS=Mus musculus GN=Rapgef1 PE=2 SV=1 - [Q3UHC1_MOUSE]                                                    | 11.76 | 5 | 13 | 13 | 29  | 0.623 | 0.989 | 0.978 | 0.891 | 79.11  | 11.76 | 22 | 29  | 1224 | 136.4 | 6.24  |
| O88685   | 26S protease regulatory subunit 6A OS=Mus musculus GN=Psmc3 PE=1 SV=2 - [PSMC3_MOUSE]                                    | 69.46 | 4 | 27 | 27 | 162 | 1.163 | 1.049 | 0.919 | 0.891 | 497.03 | 69.46 | 47 | 162 | 442  | 49.5  | 5.19  |
| P97433-2 | Isoform 2 of Rho guanine nucleotide exchange factor 28 OS=Mus musculus GN=Arhgef28 - [ARG28_MOUSE]                       | 4.61  | 3 | 5  | 6  | 8   | 1.168 | 1.091 | 1.037 | 0.891 | 18.52  | 4.61  | 8  | 8   | 1324 | 147.7 | 5.76  |
| B1AT92   | Growth factor receptor-bound protein 2 OS=Mus musculus GN=Grb2 PE=2 SV=1 - [B1AT92_MOUSE]                                | 55.67 | 4 | 12 | 12 | 104 | 1.790 | 1.315 | 1.082 | 0.891 | 299.22 | 55.67 | 24 | 104 | 203  | 23.6  | 6.80  |
| Q99M51   | Cytoplasmic protein NCK1 OS=Mus musculus GN=Nck1 PE=1 SV=1 - [NCK1_MOUSE]                                                | 39.79 | 2 | 11 | 13 | 56  | 1.672 | 0.820 | 1.117 | 0.892 | 147.09 | 39.79 | 23 | 56  | 377  | 42.9  | 6.47  |
| P53783   | Transcription factor SOX-1 OS=Mus musculus GN=Sox1 PE=2 SV=1 - [SOX1_MOUSE]                                              | 8.95  | 2 | 1  | 1  | 1   | 4.160 | 2.237 | 0.801 | 0.892 | 2.15   | 8.95  | 1  | 1   | 391  | 39.2  | 9.82  |
| D3Z6Q9   | Bridging integrator 2 OS=Mus musculus GN=Bin2 PE=2 SV=1 - [BIN2_MOUSE]                                                   | 28.83 | 1 | 8  | 10 | 53  | 1.189 | 1.115 | 0.967 | 0.892 | 134.73 | 28.83 | 18 | 53  | 489  | 52.5  | 5.34  |
| Q8CAF4-3 | Isoform 3 of NHS-like protein 1 OS=Mus musculus GN=Nhs1l - [NHSL1_MOUSE]                                                 | 10.04 | 3 | 12 | 13 | 25  | 1.176 | 0.884 | 1.397 | 0.892 | 67.65  | 10.04 | 19 | 25  | 1583 | 169.3 | 8.07  |

|          |                                                                                                                       |       |   |    |    |     |       |       |       |       |        |       |    |     |      |       |      |
|----------|-----------------------------------------------------------------------------------------------------------------------|-------|---|----|----|-----|-------|-------|-------|-------|--------|-------|----|-----|------|-------|------|
| Q9CR51   | V-type proton ATPase subunit G 1 OS=Mus musculus GN=Atp6v1g1 PE=2 SV=3 -                                              | 36.44 | 1 | 3  | 3  | 21  | 1.477 | 0.589 | 1.285 | 0.892 | 73.12  | 36.44 | 5  | 21  | 118  | 13.7  | 7.97 |
| Q9QY33   | Tetraspanin-3 OS=Mus musculus GN=Tspan3 PE=1 SV=1 - [TSN3_MOUSE]                                                      | 9.09  | 1 | 2  | 2  | 13  | 0.816 | 0.776 | 0.811 | 0.892 | 30.69  | 9.09  | 3  | 13  | 253  | 28.0  | 5.86 |
| D3YZR1   | Protein TSSC4 (Fragment) OS=Mus musculus GN=Tssc4 PE=2 SV=1 - [D3YZR1_MOUSE]                                          | 52.07 | 5 | 7  | 7  | 20  | 1.673 | 0.772 | 1.304 | 0.892 | 54.79  | 52.07 | 11 | 20  | 217  | 23.3  | 4.64 |
| A24A41   | DnaJ homolog subfamily C member 24 OS=Mus musculus GN=Dnajc24 PE=2 SV=1 -                                             | 29.73 | 3 | 4  | 4  | 11  | 1.871 | 0.959 | 1.073 | 0.892 | 34.05  | 29.73 | 7  | 11  | 148  | 16.9  | 4.92 |
| Q3UIDO   | SWI/SNF complex subunit SMARCC2 OS=Mus musculus GN=Smarcc2 PE=2 SV=1 - [Q3UIDO_MOUSE]                                 | 24.60 | 3 | 19 | 26 | 80  | 0.835 | 0.875 | 0.924 | 0.892 | 223.90 | 24.60 | 47 | 80  | 1130 | 124.6 | 5.47 |
| Q6PF9X-2 | Isoform 2 of Tankyrase-1 OS=Mus musculus GN=Tnks - [TNKS1_MOUSE]                                                      | 6.56  | 4 | 6  | 6  | 10  | 1.173 | 0.713 | 0.959 | 0.892 | 24.84  | 6.56  | 9  | 10  | 976  | 106.6 | 7.14 |
| Q8K409   | DNA polymerase beta OS=Mus musculus GN=Polb PE=2 SV=3 - [DPOLB_MOUSE]                                                 | 12.84 | 1 | 5  | 5  | 11  | 1.047 | 0.708 | 0.857 | 0.892 | 28.75  | 12.84 | 8  | 11  | 335  | 38.3  | 8.85 |
| Q8BTH6   | Transcriptional repressor scratch 2 OS=Mus musculus GN=Scrt2 PE=2 SV=2 - [SCRT2_MOUSE]                                | 11.25 | 2 | 2  | 2  | 3   | 0.935 | 0.443 | 1.217 | 0.892 | 8.48   | 11.25 | 3  | 3   | 311  | 32.7  | 8.98 |
| P50428   | Arylsulfatase A OS=Mus musculus GN=Arsa PE=2 SV=2 - [ARSA_MOUSE]                                                      | 31.42 | 2 | 10 | 11 | 40  | 1.704 | 1.166 | 0.803 | 0.892 | 108.96 | 31.42 | 17 | 40  | 506  | 53.7  | 5.87 |
| Q9D8W5   | 26S proteasome non-ATPase regulatory subunit 12 OS=Mus musculus GN=Psm12 PE=1 SV=4 - [PSD12_MOUSE]                    | 49.34 | 3 | 21 | 22 | 85  | 0.714 | 1.069 | 0.882 | 0.892 | 247.53 | 49.34 | 38 | 85  | 456  | 52.9  | 7.06 |
| Q8BGF6   | ELMO domain-containing protein 2 OS=Mus musculus GN=Elmod2 PE=2 SV=1 -                                                | 9.90  | 1 | 3  | 3  | 11  | 0.846 | 0.771 | 0.865 | 0.892 | 33.04  | 9.90  | 6  | 11  | 293  | 34.7  | 8.57 |
| Q80WT5-2 | Isoform 2 of Aftiphilin OS=Mus musculus GN=Aftph - [AFTPH_MOUSE]                                                      | 25.66 | 5 | 18 | 18 | 68  | 1.457 | 1.078 | 1.307 | 0.892 | 182.16 | 25.66 | 27 | 68  | 904  | 98.4  | 4.51 |
| P52479   | Ubiquitin carboxyl-terminal hydrolase 10 OS=Mus musculus GN=Usp10 PE=1 SV=3 - [UBP10_MOUSE]                           | 34.60 | 3 | 1  | 21 | 82  | 2.230 | 1.103 | 1.249 | 0.892 | 223.63 | 34.60 | 37 | 82  | 792  | 87.0  | 5.17 |
| J3QNX5   | Protein AI848285 OS=Mus musculus GN=AI848285 PE=4 SV=1 - [J3QNX5_MOUSE]                                               | 8.52  | 1 | 2  | 2  | 2   | 1.001 | 1.038 | 1.220 | 0.892 | 2.96   | 8.52  | 2  | 2   | 399  | 42.4  | 9.96 |
| B2KG46   | Protein bicaudal D homolog 1 OS=Mus musculus GN=Bicd1 PE=2 SV=1 - [B2KG46_MOUSE]                                      | 18.67 | 7 | 11 | 15 | 35  | 1.402 | 0.842 | 0.915 | 0.892 | 95.21  | 18.67 | 24 | 35  | 975  | 110.9 | 5.91 |
| O35551   | Rab GTPase-binding effector protein 1 OS=Mus musculus GN=Rabep1 PE=1 SV=2 - [RABE1_MOUSE]                             | 44.78 | 9 | 36 | 39 | 193 | 1.650 | 1.162 | 1.267 | 0.892 | 560.84 | 44.78 | 68 | 193 | 862  | 99.5  | 5.01 |
| Q9CZJ9   | DnaJ homolog subfamily C member 18 OS=Mus musculus GN=Dnajc18 PE=2 SV=1 -                                             | 4.20  | 1 | 1  | 1  | 2   | 1.910 | 0.692 | 0.951 | 0.892 | 8.51   | 4.20  | 1  | 2   | 357  | 41.4  | 8.78 |
| Q8BX09-2 | Isoform 2 of Retinoblastoma-binding protein 5 OS=Mus musculus GN=Rbbp5 - [RBBP5_MOUSE]                                | 21.98 | 2 | 7  | 7  | 17  | 1.442 | 0.614 | 0.854 | 0.893 | 55.91  | 21.98 | 11 | 17  | 373  | 40.7  | 4.83 |
| Q5M8N0   | CB1 cannabinoid receptor-interacting protein 1 OS=Mus musculus GN=Cnrip1 PE=1 SV=1 - [CNRP1_MOUSE]                    | 73.17 | 2 | 9  | 9  | 56  | 1.208 | 1.500 | 0.838 | 0.893 | 161.61 | 73.17 | 16 | 56  | 164  | 18.6  | 7.96 |
| Q9WUD1   | STIP1 homology and U box-containing protein 1 OS=Mus musculus GN=Stub1 PE=1 SV=1 - [CHIP_MOUSE]                       | 69.74 | 1 | 20 | 21 | 68  | 1.305 | 0.963 | 1.103 | 0.893 | 179.37 | 69.74 | 35 | 68  | 304  | 34.9  | 6.01 |
| Q3U4G3   | Xyloside xylosyltransferase 1 OS=Mus musculus GN=Xyylt1 PE=2 SV=2 - [XOYL1_MOUSE]                                     | 11.22 | 1 | 3  | 3  | 8   | 1.064 | 0.693 | 0.916 | 0.893 | 26.55  | 11.22 | 6  | 8   | 392  | 43.8  | 7.78 |
| Q6PAT0   | Probable inactive tRNA-specific adenosine deaminase-like protein 3 OS=Mus musculus GN=Adat3 PE=2 SV=1 - [ADAT3_MOUSE] | 9.46  | 1 | 2  | 2  | 5   | 1.144 | 0.834 | 0.825 | 0.893 | 18.49  | 9.46  | 4  | 5   | 349  | 37.5  | 7.23 |
| D3YW48   | Calpain small subunit 1 (Fragment) OS=Mus musculus GN=Capns1 PE=2 SV=1 -                                              | 48.13 | 3 | 9  | 9  | 37  | 1.430 | 1.290 | 0.780 | 0.893 | 114.55 | 48.13 | 16 | 37  | 241  | 25.3  | 5.60 |
| Q0GGX2-2 | Isoform 2 of Zinc finger protein 541 OS=Mus musculus GN=Znf541 - [ZNF541_MOUSE]                                       | 3.69  | 2 | 3  | 3  | 6   | 3.686 | 4.499 | 2.314 | 0.893 | 8.56   | 3.69  | 3  | 6   | 1302 | 141.7 | 7.42 |
| Q811P8   | Rho GTPase-activating protein 32 OS=Mus musculus GN=Arhgap32 PE=1 SV=2 -                                              | 27.86 | 5 | 42 | 43 | 155 | 0.895 | 1.136 | 1.380 | 0.893 | 447.32 | 27.86 | 77 | 155 | 2089 | 229.6 | 6.86 |



|           |                                                                                                          |       |   |    |    |     |        |       |       |       |         |       |    |     |      |       |      |
|-----------|----------------------------------------------------------------------------------------------------------|-------|---|----|----|-----|--------|-------|-------|-------|---------|-------|----|-----|------|-------|------|
| Q91WE1    | Sorting nexin-15 OS=Mus musculus GN=Snx15 PE=2 SV=1 - [SNX15_MOUSE]                                      | 50.15 | 3 | 12 | 12 | 33  | 1.493  | 0.944 | 1.191 | 0.893 | 85.32   | 50.15 | 20 | 33  | 337  | 37.7  | 5.24 |
| Q6IRU5-2  | Isoform 2 of Clathrin light chain B OS=Mus musculus GN=Cltb - [CLCB_MOUSE]                               | 34.60 | 3 | 1  | 11 | 181 | 1.957  | 0.898 | 1.338 | 0.893 | 469.53  | 34.60 | 20 | 181 | 211  | 23.2  | 4.68 |
| A2A9P6    | Cyclin-dependent kinase 11B OS=Mus musculus GN=Cdk11b PE=2 SV=1 - [A2A9P6_MOUSE]                         | 8.93  | 3 | 6  | 8  | 17  | 0.627  | 0.895 | 0.848 | 0.893 | 45.81   | 8.93  | 11 | 17  | 750  | 87.3  | 5.31 |
| Q9CZT4-2  | Isoform 2 of DNA-directed RNA polymerase III subunit RPC5 OS=Mus musculus GN=Polr3e - [RPC5_MOUSE]       | 9.94  | 2 | 5  | 5  | 17  | 0.597  | 0.761 | 0.916 | 0.893 | 55.43   | 9.94  | 9  | 17  | 684  | 76.8  | 6.04 |
| Q69ZT9    | TBC1 domain family member 30 OS=Mus musculus GN=Tbc1d30 PE=2 SV=2 -                                      | 1.57  | 1 | 1  | 1  | 1   | 14.581 | 3.667 | 2.524 | 0.893 | 2.48    | 1.57  | 1  | 1   | 766  | 84.8  | 8.53 |
| F6QA74    | DNA-(apurinic or apyrimidinic site) lyase (Fragment) OS=Mus musculus GN=Apex1 PE=2 SV=1 - [F6QA74_MOUSE] | 41.18 | 3 | 10 | 10 | 47  | 0.668  | 0.859 | 0.882 | 0.893 | 129.86  | 41.18 | 17 | 47  | 289  | 32.3  | 8.57 |
| O09061    | Proteasome subunit beta type-1 OS=Mus musculus GN=Psmb1 PE=1 SV=1 - [PSMB1_MOUSE]                        | 64.58 | 1 | 12 | 13 | 89  | 1.873  | 0.996 | 0.721 | 0.893 | 284.56  | 64.58 | 24 | 89  | 240  | 26.4  | 7.81 |
| Q91WM2    | Cat eye syndrome critical region protein 5 homolog OS=Mus musculus GN=Cecr5 PE=2 SV=1 - [CECR5_MOUSE]    | 28.16 | 1 | 9  | 9  | 25  | 0.768  | 0.833 | 0.745 | 0.893 | 81.80   | 28.16 | 16 | 25  | 419  | 46.3  | 7.88 |
| Q8CGI1    | Protein FAM193A OS=Mus musculus GN=Fam193a PE=1 SV=2 - [F193A_MOUSE]                                     | 3.09  | 2 | 2  | 3  | 6   | 1.009  | 0.968 | 0.850 | 0.893 | 14.29   | 3.09  | 3  | 6   | 1231 | 136.6 | 6.47 |
| Q9D2C2    | Protein SAAL1 OS=Mus musculus GN=Saal1 PE=1 SV=1 - [SAAL1_MOUSE]                                         | 6.75  | 2 | 3  | 3  | 7   | 0.786  | 0.986 | 0.689 | 0.894 | 22.46   | 6.75  | 5  | 7   | 474  | 52.7  | 4.53 |
| Q8C6E0    | Coiled-coil domain-containing protein 104 OS=Mus musculus GN=Ccdc104 PE=2 SV=1 - [CC104_MOUSE]           | 52.48 | 2 | 13 | 13 | 75  | 1.592  | 0.903 | 1.234 | 0.894 | 212.01  | 52.48 | 23 | 75  | 343  | 39.6  | 4.93 |
| Q3TXU5    | Deoxyhypusine synthase OS=Mus musculus GN=Dhps PE=2 SV=2 - [DHYS_MOUSE]                                  | 31.44 | 2 | 9  | 9  | 31  | 1.711  | 0.937 | 0.726 | 0.894 | 92.31   | 31.44 | 14 | 31  | 369  | 40.6  | 5.67 |
| Q3UPL0    | Protein transport protein Sec31A OS=Mus musculus GN=Sec31a PE=1 SV=2 - [SC31A_MOUSE]                     | 35.28 | 3 | 34 | 37 | 153 | 0.748  | 0.915 | 0.850 | 0.894 | 489.94  | 35.28 | 64 | 153 | 1230 | 133.5 | 6.76 |
| E9PZY1    | Hermansky-Pudlak syndrome 3 protein homolog OS=Mus musculus GN=Hps3 PE=2 SV=1 - [E9PZY1_MOUSE]           | 0.69  | 2 | 1  | 1  | 1   | 0.938  | 0.931 | 0.950 | 0.894 | 1.71    | 0.69  | 1  | 1   | 870  | 98.1  | 5.67 |
| Q80XL6    | Acyl-CoA dehydrogenase family member 11 OS=Mus musculus GN=Acad11 PE=1 SV=2 - [ACD11_MOUSE]              | 16.94 | 2 | 11 | 12 | 22  | 0.806  | 0.664 | 0.798 | 0.894 | 61.14   | 16.94 | 19 | 22  | 779  | 87.3  | 8.43 |
| Q9QYE3-15 | Isoform 7 of B-cell lymphoma/leukemia 11A OS=Mus musculus GN=Bcl11a - [BC11A_MOUSE]                      | 26.15 | 6 | 2  | 2  | 2   | 0.990  | 1.061 | 1.460 | 0.894 | 3.68    | 26.15 | 2  | 2   | 130  | 14.3  | 5.54 |
| P61961    | Ubiquitin-fold modifier 1 OS=Mus musculus GN=Ufm1 PE=1 SV=1 - [UFM1_MOUSE]                               | 68.24 | 4 | 4  | 4  | 15  | 1.770  | 1.036 | 1.059 | 0.894 | 45.94   | 68.24 | 7  | 15  | 85   | 9.1   | 9.31 |
| P27612    | Phospholipase A-2-activating protein OS=Mus musculus GN=Plaa PE=2 SV=4 - [PLAP_MOUSE]                    | 38.79 | 2 | 25 | 25 | 110 | 0.996  | 0.959 | 0.876 | 0.894 | 336.13  | 38.79 | 47 | 110 | 794  | 87.2  | 6.14 |
| P70206    | Plexin-A1 OS=Mus musculus GN=Plxna1 PE=1 SV=1 - [PLXA1_MOUSE]                                            | 32.00 | 1 | 36 | 56 | 193 | 0.540  | 0.876 | 0.650 | 0.894 | 564.20  | 32.00 | 95 | 193 | 1894 | 211.0 | 6.90 |
| D3Z3N4    | MCG11326, isoform CRA_a OS=Mus musculus GN=Hnmp3 PE=4 SV=1 - [D3Z3N4_MOUSE]                              | 50.58 | 3 | 10 | 11 | 47  | 1.593  | 1.130 | 1.075 | 0.894 | 169.12  | 50.58 | 19 | 47  | 346  | 36.8  | 6.87 |
| P70460    | Vasodilator-stimulated phosphoprotein OS=Mus musculus GN=Vasp PE=1 SV=4 - [VASP_MOUSE]                   | 18.40 | 1 | 8  | 8  | 23  | 1.466  | 1.075 | 0.903 | 0.894 | 57.05   | 18.40 | 13 | 23  | 375  | 39.6  | 8.53 |
| Q91WC0    | Histone-lysine N-methyltransferase setd3 OS=Mus musculus GN=Setd3 PE=1 SV=1 -                            | 16.33 | 7 | 11 | 11 | 28  | 0.822  | 0.887 | 0.797 | 0.894 | 66.06   | 16.33 | 18 | 28  | 594  | 67.1  | 5.60 |
| P61087    | Ubiquitin-conjugating enzyme E2 K OS=Mus musculus GN=Ube2k PE=1 SV=3 - [UBE2K_MOUSE]                     | 41.50 | 3 | 7  | 8  | 43  | 0.982  | 0.968 | 0.927 | 0.894 | 117.98  | 41.50 | 14 | 43  | 200  | 22.4  | 5.44 |
| Q3TFD2    | Lysophosphatidylcholine acyltransferase 1 OS=Mus musculus GN=Lpcat1 PE=1 SV=1 - [PCAT1_MOUSE]            | 19.29 | 5 | 8  | 8  | 13  | 0.877  | 1.026 | 0.826 | 0.894 | 29.08   | 19.29 | 12 | 13  | 534  | 59.7  | 6.34 |
| Q63810-2  | Isoform 2 of Calcineurin subunit B type 1 OS=Mus musculus GN=Ppp3r1 - [CANB1_MOUSE]                      | 77.50 | 3 | 13 | 13 | 421 | 0.828  | 1.496 | 1.949 | 0.895 | 1491.11 | 77.50 | 26 | 421 | 160  | 18.2  | 4.92 |

|           |                                                                                                                                         |       |    |    |    |     |       |       |       |       |        |       |    |     |      |       |       |
|-----------|-----------------------------------------------------------------------------------------------------------------------------------------|-------|----|----|----|-----|-------|-------|-------|-------|--------|-------|----|-----|------|-------|-------|
| P47911    | 60S ribosomal protein L6<br>OS=Mus musculus<br>GN=Rpl6 PE=1 SV=3 -<br>[RL6_MOUSE]                                                       | 39.86 | 2  | 14 | 14 | 61  | 0.618 | 0.826 | 0.763 | 0.895 | 134.22 | 39.86 | 24 | 61  | 296  | 33.5  | 10.70 |
| O35375-5  | Isoform B0 of Neuropilin-2<br>OS=Mus musculus<br>GN=Nrp2 -<br>[NRP2_MOUSE]                                                              | 27.75 | 6  | 19 | 19 | 69  | 0.969 | 2.452 | 0.800 | 0.895 | 192.67 | 27.75 | 31 | 69  | 901  | 101.4 | 5.81  |
| Q99JX7    | Nuclear RNA export factor 1<br>OS=Mus musculus<br>GN=Nxf1 PE=1 SV=3 -<br>[NXF1_MOUSE]                                                   | 17.96 | 1  | 9  | 9  | 19  | 0.582 | 0.753 | 0.848 | 0.895 | 60.63  | 17.96 | 14 | 19  | 618  | 70.3  | 8.73  |
| Q912M2    | SH2B adapter protein 1<br>OS=Mus musculus<br>GN=Sh2b1 PE=1 SV=2 -<br>[SH2B1_MOUSE]                                                      | 25.79 | 6  | 11 | 11 | 25  | 1.003 | 1.101 | 0.921 | 0.895 | 85.60  | 25.79 | 16 | 25  | 756  | 79.6  | 5.25  |
| Q8C011    | Alkylglycerophosphate synthase,<br>peroxisomal<br>OS=Mus musculus<br>GN=Agps PE=1<br>SV=1 - [ADAS_MOUSE]                                | 28.22 | 5  | 12 | 12 | 29  | 0.941 | 0.840 | 0.811 | 0.895 | 80.41  | 28.22 | 19 | 29  | 645  | 71.6  | 7.50  |
| P54775    | 26S protease regulatory<br>subunit 68<br>OS=Mus musculus<br>GN=Psmc4<br>PE=1 SV=2 -                                                     | 64.11 | 1  | 22 | 23 | 106 | 0.965 | 1.134 | 0.842 | 0.895 | 304.61 | 64.11 | 39 | 106 | 418  | 47.4  | 5.21  |
| Q9EQQ2    | Protein YIPF5<br>OS=Mus musculus<br>GN=Yipf5 PE=2<br>SV=1 - [YIPF5_MOUSE]                                                               | 4.67  | 1  | 1  | 1  | 10  | 0.679 | 0.594 | 0.826 | 0.895 | 23.73  | 4.67  | 2  | 10  | 257  | 27.9  | 4.36  |
| Q8BFZ2-2  | Isoform 2 of Lipid<br>phosphate phosphatase-<br>related protein type 1<br>OS=Mus musculus<br>GN=Lppr1 -<br>[LPPR1_MOUSE]                | 14.24 | 2  | 2  | 2  | 12  | 1.269 | 0.923 | 1.046 | 0.895 | 25.39  | 14.24 | 4  | 12  | 295  | 32.7  | 7.01  |
| G3X948    | DNA polymerase sigma<br>OS=Mus musculus<br>GN=Papd7 PE=4 SV=1 -<br>[G3X948_MOUSE]                                                       | 2.58  | 2  | 1  | 1  | 1   | 1.564 | 1.211 | 0.871 | 0.895 | 0.00   | 2.58  | 1  | 1   | 542  | 60.0  | 9.39  |
| Q8C016    | Ankyrin repeat domain-<br>containing protein<br>SOWAHC<br>OS=Mus musculus<br>GN=Sowahc<br>PE=2 SV=2 -                                   | 12.30 | 1  | 5  | 5  | 9   | 0.898 | 0.989 | 0.970 | 0.895 | 23.00  | 12.30 | 6  | 9   | 512  | 54.9  | 6.00  |
| P63056-2  | Isoform 2 of Noelin-3<br>OS=Mus musculus<br>GN=Olfm3 -<br>[NOE3_MOUSE]                                                                  | 9.17  | 3  | 3  | 3  | 8   | 0.870 | 0.309 | 0.792 | 0.895 | 22.03  | 9.17  | 5  | 8   | 458  | 52.8  | 8.15  |
| Q8BYM5    | Neuroigin-3<br>OS=Mus musculus<br>GN=Nlgn3 PE=1<br>SV=2 - [NLGN3_MOUSE]                                                                 | 30.42 | 4  | 13 | 16 | 59  | 0.655 | 1.243 | 0.929 | 0.895 | 165.06 | 30.42 | 28 | 59  | 825  | 91.1  | 5.80  |
| Q8CFT0    | REL2-like 2<br>OS=Mus musculus<br>GN=Rel2 PE=2<br>SV=1 - [Q8CFT0_MOUSE]                                                                 | 36.05 | 6  | 7  | 7  | 63  | 0.823 | 0.422 | 0.965 | 0.895 | 178.99 | 36.05 | 11 | 63  | 294  | 31.4  | 6.46  |
| Q9JKV1    | Proteasomal ubiquitin<br>receptor<br>ADRM1<br>OS=Mus musculus<br>GN=Adrm1<br>PE=1 SV=2 -<br>[ADRM1_MOUSE]                               | 17.94 | 2  | 8  | 8  | 63  | 1.152 | 1.012 | 0.924 | 0.895 | 189.71 | 17.94 | 12 | 63  | 407  | 42.0  | 5.07  |
| Q80Y83-13 | Isoform 13 of Dixin<br>OS=Mus musculus<br>GN=Dixc1 -<br>[DIXC1_MOUSE]                                                                   | 22.25 | 15 | 8  | 9  | 30  | 1.182 | 0.794 | 1.007 | 0.895 | 83.17  | 22.25 | 14 | 30  | 391  | 44.7  | 6.27  |
| O54825    | Bystin<br>OS=Mus musculus<br>GN=Bystl PE=1 SV=3 -<br>[BYST_MOUSE]                                                                       | 6.65  | 1  | 2  | 3  | 3   | 0.573 | 0.733 | 0.647 | 0.895 | 7.75   | 6.65  | 3  | 3   | 436  | 49.8  | 7.78  |
| Q9DD03    | Ras-related protein Rab-13<br>OS=Mus musculus<br>GN=Rab13 PE=1 SV=1 -<br>[RAB13_MOUSE]                                                  | 27.72 | 3  | 2  | 6  | 50  | 0.609 | 0.756 | 0.755 | 0.895 | 132.57 | 27.72 | 9  | 50  | 202  | 22.8  | 9.50  |
| D3YVE6    | MCG18601<br>OS=Mus musculus<br>GN=Rpl7a-ps10<br>PE=4 SV=1 -<br>[D3YVE6_MOUSE]                                                           | 47.37 | 11 | 15 | 16 | 66  | 0.567 | 0.786 | 0.764 | 0.895 | 179.97 | 47.37 | 28 | 66  | 266  | 30.0  | 10.45 |
| A2A395    | NMDA receptor<br>synaptonuclear-signaling<br>and neuronal migration<br>factor<br>OS=Mus musculus<br>GN=Nsmf PE=2 SV=1 -<br>[NSMF_MOUSE] | 22.96 | 12 | 9  | 10 | 24  | 0.603 | 1.198 | 1.053 | 0.895 | 57.63  | 22.96 | 16 | 24  | 479  | 53.9  | 8.51  |
| Q9QXX4    | Calcium-binding<br>mitochondrial carrier<br>protein Aralar2<br>OS=Mus musculus<br>GN=Slc25a13<br>PE=1 SV=1 -<br>[ALAR2_MOUSE]           | 25.00 | 1  | 9  | 15 | 76  | 1.393 | 1.377 | 0.550 | 0.895 | 205.75 | 25.00 | 23 | 76  | 676  | 74.4  | 8.60  |
| P57784    | U2 small nuclear<br>ribonucleoprotein A'<br>OS=Mus musculus<br>GN=Snrpa1 PE=1 SV=2 -                                                    | 49.80 | 2  | 12 | 12 | 56  | 0.756 | 0.694 | 0.851 | 0.895 | 159.65 | 49.80 | 19 | 56  | 255  | 28.3  | 8.62  |
| P22935    | Cellular retinoic acid-<br>binding protein 2<br>OS=Mus musculus<br>GN=Crabp2<br>PE=2 SV=2 -                                             | 18.12 | 1  | 2  | 3  | 7   | 1.267 | 4.666 | 0.619 | 0.895 | 16.17  | 18.12 | 5  | 7   | 138  | 15.7  | 5.71  |
| Q9CQ80    | Vacuolar protein-sorting-<br>associated protein 25<br>OS=Mus musculus<br>GN=Vps25 PE=2 SV=1 -<br>[VPS25_MOUSE]                          | 35.80 | 6  | 5  | 5  | 23  | 0.989 | 1.338 | 0.945 | 0.895 | 63.54  | 35.80 | 9  | 23  | 176  | 20.7  | 6.34  |
| Q8K3W3    | Protein CASC3<br>OS=Mus musculus<br>GN=Casc3 PE=1<br>SV=3 - [CASC3_MOUSE]                                                               | 8.17  | 1  | 3  | 3  | 10  | 1.261 | 1.009 | 0.982 | 0.895 | 24.54  | 8.17  | 5  | 10  | 698  | 75.7  | 6.44  |
| E9Q4G7    | Casein kinase I isoform<br>alpha<br>OS=Mus musculus<br>GN=Csnk1a1 PE=2 SV=1 -<br>[E9Q4G7_MOUSE]                                         | 37.20 | 8  | 12 | 12 | 43  | 0.883 | 0.824 | 0.867 | 0.895 | 106.82 | 37.20 | 20 | 43  | 336  | 38.7  | 9.57  |
| Q64487-7  | Isoform G of Receptor-<br>type tyrosine-protein<br>phosphatase delta<br>OS=Mus musculus<br>GN=Ptpd -<br>[PTPD_MOUSE]                    | 34.86 | 23 | 42 | 48 | 220 | 1.260 | 1.065 | 1.118 | 0.896 | 650.21 | 34.86 | 90 | 220 | 1905 | 213.4 | 6.62  |

|          |                                                                                                                   |       |     |    |    |     |       |       |       |       |         |       |    |     |      |       |      |
|----------|-------------------------------------------------------------------------------------------------------------------|-------|-----|----|----|-----|-------|-------|-------|-------|---------|-------|----|-----|------|-------|------|
| Q811U4   | Mitofusin-1 OS=Mus musculus GN=Mfn1 PE=1 SV=3 - [MFN1_MOUSE]                                                      | 19.84 | 4   | 11 | 12 | 22  | 0.743 | 0.699 | 0.857 | 0.896 | 63.38   | 19.84 | 18 | 22  | 741  | 83.7  | 6.51 |
| Q62092   | Neuron-specific protein family member 1 OS=Mus musculus GN=Nsg1 PE=2 SV=3 - [NSG1_MOUSE]                          | 22.70 | 1   | 3  | 3  | 6   | 0.859 | 0.882 | 0.929 | 0.896 | 19.76   | 22.70 | 5  | 6   | 185  | 20.9  | 6.21 |
| Q8K224   | N-acetyltransferase 10 OS=Mus musculus GN=Nat10 PE=2 SV=1 - [NAT10_MOUSE]                                         | 15.72 | 4   | 13 | 14 | 24  | 1.311 | 0.976 | 0.789 | 0.896 | 62.54   | 15.72 | 22 | 24  | 1024 | 115.3 | 8.32 |
| Q91YE9-2 | Isoform 2 of Cytosolic 5'-nucleotidase 1B OS=Mus musculus GN=N5c1b - [SNT1B_MOUSE]                                | 5.95  | 4   | 2  | 3  | 5   | 1.145 | 0.688 | 1.147 | 0.896 | 12.58   | 5.95  | 4  | 5   | 555  | 62.9  | 8.28 |
| Q7TSH9   | Zinc finger protein 184 OS=Mus musculus GN=Zfp184 PE=2 SV=1 - [ZN184_MOUSE]                                       | 6.78  | 145 | 2  | 3  | 3   | 1.439 | 0.872 | 1.279 | 0.896 | 4.58    | 6.78  | 3  | 3   | 737  | 84.0  | 8.37 |
| Q9Z1X4   | Interleukin enhancer-binding factor 3 OS=Mus musculus GN=Ifi3 PE=1 SV=2 - [ILF3_MOUSE]                            | 50.00 | 4   | 25 | 30 | 163 | 0.929 | 0.680 | 0.837 | 0.896 | 393.01  | 50.00 | 52 | 163 | 898  | 96.0  | 8.76 |
| Q6PAL7   | AT-hook DNA-binding motif containing protein 1 OS=Mus musculus GN=Ahd1 PE=1 SV=1 - [AHDC1_MOUSE]                  | 3.51  | 1   | 5  | 5  | 11  | 0.592 | 0.851 | 0.961 | 0.896 | 35.71   | 3.51  | 9  | 11  | 1594 | 168.0 | 8.97 |
| P26369   | Splicing factor U2AF 65 kDa subunit OS=Mus musculus GN=U2af2 PE=1 SV=3 - [U2AF2_MOUSE]                            | 29.47 | 2   | 12 | 12 | 42  | 0.886 | 0.982 | 0.855 | 0.896 | 109.46  | 29.47 | 22 | 42  | 475  | 53.5  | 9.09 |
| O08739   | AMP deaminase 3 OS=Mus musculus GN=Ampd3 PE=2 SV=2 - [AMPD3_MOUSE]                                                | 19.97 | 6   | 13 | 14 | 28  | 0.701 | 0.712 | 0.738 | 0.896 | 69.01   | 19.97 | 19 | 28  | 766  | 88.6  | 7.33 |
| O35449   | Proline-rich transmembrane protein 1 OS=Mus musculus GN=Prrt1 PE=1 SV=1 - [PRT1_MOUSE]                            | 12.09 | 1   | 3  | 3  | 31  | 1.076 | 1.677 | 1.256 | 0.896 | 83.18   | 12.09 | 6  | 31  | 306  | 31.4  | 7.65 |
| Q99395   | Cyclin-dependent kinase 9 OS=Mus musculus GN=Cdk9 PE=1 SV=1 - [CDK9_MOUSE]                                        | 26.34 | 20  | 7  | 9  | 49  | 0.671 | 0.981 | 0.877 | 0.896 | 111.26  | 26.34 | 15 | 49  | 372  | 42.7  | 8.79 |
| Q8BGS1-3 | Isoform 3 of Band 4.1-like protein 5 OS=Mus musculus GN=Epb415 - [E4115_MOUSE]                                    | 10.01 | 3   | 5  | 6  | 8   | 0.925 | 0.675 | 0.776 | 0.896 | 26.05   | 10.01 | 8  | 8   | 739  | 82.5  | 6.47 |
| Q9D8Z2   | TP53-regulated inhibitor of apoptosis 1 OS=Mus musculus GN=Triap1 PE=2 SV=1 - [TRIA1_MOUSE]                       | 55.26 | 1   | 4  | 4  | 19  | 1.725 | 1.002 | 1.305 | 0.896 | 72.84   | 55.26 | 6  | 19  | 76   | 8.8   | 5.48 |
| Q9JHZ2   | Progressive ankylosis protein OS=Mus musculus GN=Ankh PE=2 SV=1 - [ANKH_MOUSE]                                    | 9.76  | 1   | 3  | 4  | 9   | 0.669 | 0.807 | 0.814 | 0.896 | 25.48   | 9.76  | 7  | 9   | 492  | 54.3  | 7.88 |
| Q9WVJ2   | 26S proteasome non-ATPase regulatory subunit 13 OS=Mus musculus GN=Psm13 PE=1 SV=1 - [PSD13_MOUSE]                | 52.93 | 6   | 18 | 18 | 72  | 0.893 | 1.139 | 0.784 | 0.896 | 209.05  | 52.93 | 34 | 72  | 376  | 42.8  | 5.71 |
| F6ZFU0   | Elongation factor 1-delta (Fragment) OS=Mus musculus GN=Eef1d PE=2 SV=1 - [F6ZFU_MOUSE]                           | 58.88 | 4   | 1  | 27 | 201 | 1.042 | 1.080 | 0.732 | 0.896 | 613.30  | 58.88 | 46 | 201 | 552  | 61.4  | 7.39 |
| Q8BZB2   | Phosphopantothencycline decarboxylase OS=Mus musculus GN=Ppcc1 PE=2 SV=1 - [COAC_MOUSE]                           | 35.29 | 1   | 6  | 6  | 17  | 1.729 | 1.220 | 0.990 | 0.896 | 42.64   | 35.29 | 9  | 17  | 204  | 22.3  | 6.52 |
| P70268   | Serine/threonine-protein kinase N1 OS=Mus musculus GN=Pkn1 PE=1 SV=3 - [PKN1_MOUSE]                               | 13.42 | 3   | 7  | 10 | 30  | 0.570 | 1.015 | 0.851 | 0.896 | 80.76   | 13.42 | 13 | 30  | 946  | 104.3 | 6.27 |
| Q9QXK3   | Coatamer subunit gamma-2 OS=Mus musculus GN=Copp2 PE=2 SV=1 - [COPG2_MOUSE]                                       | 31.00 | 5   | 13 | 22 | 56  | 0.619 | 0.828 | 0.873 | 0.896 | 157.90  | 31.00 | 38 | 56  | 871  | 97.6  | 5.80 |
| P62073   | Mitochondrial import inner membrane translocase subunit Tim10 OS=Mus musculus GN=Timm10 PE=1 SV=1 - [TIM10_MOUSE] | 75.56 | 1   | 8  | 8  | 102 | 1.971 | 1.001 | 1.293 | 0.896 | 291.88  | 75.56 | 15 | 102 | 90   | 10.3  | 6.29 |
| Q8C8R3-3 | Isoform 3 of Ankyrin-2 OS=Mus musculus GN=Ank2 - [ANK2_MOUSE]                                                     | 55.71 | 1   | 2  | 43 | 429 | 1.349 | 0.845 | 1.127 | 0.896 | 1325.79 | 55.71 | 73 | 429 | 1050 | 117.4 | 4.92 |
| Q02614   | SAP30-binding protein OS=Mus musculus GN=Sap30bp PE=2 SV=2 - [S30BP_MOUSE]                                        | 28.57 | 1   | 6  | 6  | 8   | 1.374 | 0.905 | 1.119 | 0.896 | 22.48   | 28.57 | 8  | 8   | 308  | 33.8  | 4.87 |
| Q78PG9   | Coiled-coil domain-containing protein 25 OS=Mus musculus GN=Ccd25 PE=1 SV=1 - [CCD25_MOUSE]                       | 38.46 | 1   | 9  | 9  | 25  | 1.317 | 0.808 | 1.004 | 0.896 | 77.35   | 38.46 | 15 | 25  | 208  | 24.5  | 6.95 |
| Q91Y09   | Protein Pcdha9 OS=Mus musculus GN=Pcdha2 PE=2 SV=1 - [Q91Y09_MOUSE]                                               | 8.65  | 2   | 6  | 7  | 14  | 0.795 | 0.975 | 1.018 | 0.896 | 44.12   | 8.65  | 12 | 14  | 1006 | 109.4 | 5.47 |
| G3X8R4   | General transcription factor II H, polypeptide 1 OS=Mus musculus GN=Gtf2h1 PE=4 SV=1 - [G3X8R4_MOUSE]             | 7.86  | 4   | 4  | 4  | 6   | 1.562 | 2.050 | 1.168 | 0.896 | 15.03   | 7.86  | 6  | 6   | 547  | 61.8  | 8.76 |

|          |                                                                                                              |       |    |    |    |     |       |       |       |       |        |       |    |     |      |       |      |
|----------|--------------------------------------------------------------------------------------------------------------|-------|----|----|----|-----|-------|-------|-------|-------|--------|-------|----|-----|------|-------|------|
| O35972   | 39S ribosomal protein L23, mitochondrial OS=Mus musculus GN=Mp123 PE=2 SV=1 - [RM23_MOUSE]                   | 33.56 | 1  | 3  | 3  | 10  | 0.555 | 0.588 | 0.790 | 0.896 | 38.98  | 33.56 | 5  | 10  | 146  | 17.1  | 9.76 |
| Q9EST3   | Eukaryotic translation initiation factor 4E transporter OS=Mus musculus GN=Eif4enif1 PE=1 SV=2 - [EFT_MOUSE] | 11.29 | 5  | 8  | 8  | 27  | 1.232 | 0.853 | 0.988 | 0.896 | 77.50  | 11.29 | 12 | 27  | 983  | 107.9 | 7.74 |
| Q9QZK2-2 | isoform 2 of Breast cancer anti-estrogen resistance protein 3 OS=Mus musculus GN=Bcar3 - [BCAR3_MOUSE]       | 4.57  | 2  | 3  | 3  | 6   | 0.569 | 0.701 | 0.904 | 0.896 | 14.02  | 4.57  | 4  | 6   | 700  | 78.7  | 7.14 |
| Q61081   | Hsp90 co-chaperone Cdc37 OS=Mus musculus GN=Cdc37 PE=2 SV=1 - [CDC37_MOUSE]                                  | 26.65 | 1  | 10 | 10 | 69  | 0.902 | 0.845 | 0.961 | 0.896 | 169.70 | 26.65 | 18 | 69  | 379  | 44.6  | 5.34 |
| Q9QY81   | Nuclear pore membrane glycoprotein 210 OS=Mus musculus GN=Nup210 PE=1 SV=2 - [PO210_MOUSE]                   | 12.04 | 1  | 18 | 19 | 44  | 0.923 | 1.007 | 0.921 | 0.896 | 138.12 | 12.04 | 29 | 44  | 1886 | 204.0 | 6.65 |
| Q9D610   | Cox1c protein OS=Mus musculus GN=Cox1c PE=4 SV=1 - [Q9D610_MOUSE]                                            | 15.18 | 1  | 1  | 1  | 1   | 1.378 | 1.128 | 0.929 | 0.897 | 4.58   | 15.18 | 1  | 1   | 112  | 13.6  | 5.01 |
| F6Z129   | Calcium uptake protein 1, mitochondrial (Fragment) OS=Mus musculus GN=Micu1 PE=2 SV=1 - [F6Z129_MOUSE]       | 44.87 | 1  | 1  | 2  | 5   | 2.225 | 2.405 | 0.831 | 0.897 | 21.06  | 44.87 | 3  | 5   | 78   | 8.9   | 7.46 |
| Q9Z0G0   | PDZ domain-containing protein GIPC1 OS=Mus musculus GN=Gipc1 PE=1 SV=1 - [GIPC1_MOUSE]                       | 45.05 | 3  | 12 | 12 | 68  | 0.914 | 1.058 | 0.963 | 0.897 | 206.85 | 45.05 | 21 | 68  | 333  | 36.1  | 5.91 |
| Q8VCV1   | Alpha/beta hydrolase domain-containing protein 17C OS=Mus musculus GN=Abhd17c PE=2 SV=2 - [ABI17C_MOUSE]     | 12.81 | 1  | 3  | 3  | 7   | 0.735 | 0.756 | 0.821 | 0.897 | 21.12  | 12.81 | 5  | 7   | 320  | 35.1  | 5.64 |
| Q3TBW2   | 39S ribosomal protein L10, mitochondrial OS=Mus musculus GN=Mp110 PE=2 SV=2 - [RM10_MOUSE]                   | 29.01 | 2  | 5  | 5  | 13  | 0.641 | 0.614 | 0.974 | 0.897 | 27.10  | 29.01 | 9  | 13  | 262  | 29.4  | 9.69 |
| P61290   | Proteasome activator complex subunit 3 OS=Mus musculus GN=Psmc3 PE=1 SV=1 - [PSME3_MOUSE]                    | 29.53 | 3  | 8  | 8  | 30  | 1.059 | 1.819 | 0.710 | 0.897 | 96.22  | 29.53 | 13 | 30  | 254  | 29.5  | 5.95 |
| Q8VFF8   | MCS58953 OS=Mus musculus GN=Olfir786 PE=3 SV=1 - [Q8VFF8_MOUSE]                                              | 3.21  | 2  | 1  | 1  | 1   | 0.964 | 1.143 | 1.247 | 0.897 | 2.36   | 3.21  | 1  | 1   | 312  | 35.6  | 8.68 |
| B9EJA2-2 | isoform 2 of Cortactin-binding protein 2 OS=Mus musculus GN=Ctnbp2 - [CTTB2_MOUSE]                           | 51.43 | 4  | 1  | 27 | 144 | 1.043 | 1.479 | 2.558 | 0.897 | 438.40 | 51.43 | 47 | 144 | 630  | 67.5  | 8.22 |
| Q9D0L8   | mRNA cap guanine-N7 methyltransferase OS=Mus musculus GN=Rnmt PE=1 SV=1 - [MCES_MOUSE]                       | 41.72 | 6  | 14 | 15 | 53  | 0.772 | 0.837 | 0.938 | 0.897 | 151.12 | 41.72 | 23 | 53  | 465  | 53.3  | 6.48 |
| P16951-2 | isoform 2 of Cyclic AMP-dependent transcription factor ATF-2 OS=Mus musculus GN=Atf2 - [ATF2_MOUSE]          | 20.57 | 8  | 5  | 6  | 16  | 1.021 | 1.027 | 1.329 | 0.897 | 52.70  | 20.57 | 10 | 16  | 389  | 42.3  | 7.17 |
| Q8R4X3   | RNA-binding protein 12 OS=Mus musculus GN=Rbm12 PE=1 SV=3 - [RBM12_MOUSE]                                    | 16.94 | 5  | 14 | 14 | 33  | 1.442 | 1.164 | 0.965 | 0.897 | 92.50  | 16.94 | 20 | 33  | 992  | 102.7 | 8.32 |
| Q3U9G9   | Lamin-B receptor OS=Mus musculus GN=Lbr PE=1 SV=2 - [LBR_MOUSE]                                              | 10.70 | 1  | 7  | 7  | 21  | 0.508 | 0.823 | 0.787 | 0.898 | 61.50  | 10.70 | 11 | 21  | 626  | 71.4  | 9.36 |
| P49722   | Proteasome subunit alpha type-2 OS=Mus musculus GN=Psmc2 PE=1 SV=3 - [PSA2_MOUSE]                            | 67.09 | 1  | 14 | 14 | 93  | 1.535 | 0.909 | 0.706 | 0.898 | 259.54 | 67.09 | 25 | 93  | 234  | 25.9  | 7.43 |
| Q3U332   | Ras and Rab interactor 3 OS=Mus musculus GN=Rin3 PE=2 SV=1 - [Q3U332_MOUSE]                                  | 1.56  | 2  | 1  | 1  | 1   | 1.668 | 1.180 | 0.777 | 0.898 | 2.90   | 1.56  | 1  | 1   | 900  | 98.6  | 7.36 |
| O88520   | Leucine-rich repeat protein SHOC-2 OS=Mus musculus GN=Shoc2 PE=2 SV=2 - [SHOC2_MOUSE]                        | 22.16 | 1  | 9  | 10 | 25  | 0.603 | 0.754 | 0.842 | 0.898 | 59.62  | 22.16 | 16 | 25  | 582  | 64.9  | 8.46 |
| A2AQ25   | Sickle tail protein OS=Mus musculus GN=Skt PE=1 SV=1 - [SKT_MOUSE]                                           | 26.72 | 18 | 6  | 44 | 156 | 1.239 | 1.346 | 1.185 | 0.898 | 410.92 | 26.72 | 75 | 156 | 1946 | 212.9 | 7.77 |
| D3YVL0   | Putative helicase MOV-10 OS=Mus musculus GN=Nov10 PE=4 SV=1 - [D3YVL0_MOUSE]                                 | 6.57  | 3  | 5  | 5  | 8   | 1.557 | 1.221 | 0.817 | 0.898 | 19.39  | 6.57  | 6  | 8   | 1004 | 113.5 | 8.98 |
| Q9CQF0   | 39S ribosomal protein L11, mitochondrial OS=Mus musculus GN=Mp111 PE=2 SV=1 - [RM11_MOUSE]                   | 31.77 | 1  | 7  | 7  | 15  | 1.228 | 1.045 | 0.911 | 0.898 | 43.13  | 31.77 | 11 | 15  | 192  | 20.7  | 9.73 |
| Q9DB42   | Zinc finger protein 593 OS=Mus musculus GN=Znf593 PE=2 SV=2 - [ZN593_MOUSE]                                  | 8.96  | 1  | 1  | 1  | 8   | 1.484 | 0.772 | 1.369 | 0.898 | 15.08  | 8.96  | 2  | 8   | 134  | 15.1  | 9.55 |

|          |                                                                                                                           |       |    |    |    |     |       |       |       |       |        |       |    |     |      |       |      |
|----------|---------------------------------------------------------------------------------------------------------------------------|-------|----|----|----|-----|-------|-------|-------|-------|--------|-------|----|-----|------|-------|------|
| Q9JKC8   | AP-3 complex subunit mu-1 OS=Mus musculus GN=Ap3m1 PE=1 SV=1 - [AP3M1_MOUSE]                                              | 36.84 | 4  | 9  | 11 | 31  | 0.644 | 0.718 | 0.898 | 0.898 | 84.54  | 36.84 | 17 | 31  | 418  | 46.9  | 6.93 |
| P28271   | Cytoplasmic aconitate hydratase OS=Mus musculus GN=Aco1 PE=1 SV=3 - [ACOC_MOUSE]                                          | 45.11 | 1  | 33 | 34 | 150 | 1.495 | 0.730 | 0.740 | 0.898 | 451.98 | 45.11 | 61 | 150 | 889  | 98.1  | 7.50 |
| Q8VCQ3   | Nuclear receptor-binding factor 2 OS=Mus musculus GN=Nrbf2 PE=1 SV=1 - [NRBF2_MOUSE]                                      | 42.51 | 2  | 10 | 10 | 21  | 1.528 | 1.133 | 1.246 | 0.898 | 53.32  | 42.51 | 14 | 21  | 287  | 32.5  | 5.76 |
| P62878   | E3 ubiquitin-protein ligase RBX1 OS=Mus musculus GN=Rbx1 PE=1 SV=1 - [RBX1_MOUSE]                                         | 23.15 | 1  | 2  | 2  | 8   | 5.942 | 2.945 | 1.483 | 0.898 | 15.55  | 23.15 | 2  | 8   | 108  | 12.3  | 6.96 |
| E9Q9E9   | Protein 1190002N15Rik OS=Mus musculus GN=1190002N15Rik PE=2 SV=1 - [E9Q9E9_MOUSE]                                         | 4.42  | 2  | 2  | 2  | 4   | 0.686 | 0.919 | 0.656 | 0.898 | 11.47  | 4.42  | 4  | 4   | 430  | 49.4  | 8.63 |
| E9Q137   | Protein Tex264 OS=Mus musculus GN=Tex264 PE=4 SV=1 - [E9Q137_MOUSE]                                                       | 26.21 | 2  | 5  | 5  | 24  | 0.911 | 1.110 | 0.862 | 0.898 | 70.42  | 26.21 | 9  | 24  | 309  | 33.6  | 5.40 |
| Q9WUAG-2 | Isoform 2 of RAC-gamma serine/threonine-protein kinase OS=Mus musculus GN=Akt3 - [AKT3_MOUSE]                             | 30.64 | 2  | 9  | 14 | 36  | 0.710 | 1.067 | 1.008 | 0.898 | 100.87 | 30.64 | 23 | 36  | 470  | 54.6  | 6.70 |
| Q9DC22   | DOB1- and CUL4-associated factor 6 OS=Mus musculus GN=Dcaf6 PE=1 SV=1 - [DCAF6_MOUSE]                                     | 8.11  | 1  | 7  | 7  | 13  | 1.097 | 1.516 | 1.241 | 0.898 | 34.00  | 8.11  | 9  | 13  | 876  | 97.5  | 5.22 |
| P48302   | Endothelin B receptor OS=Mus musculus GN=Ednrb PE=2 SV=1 - [EDNRB_MOUSE]                                                  | 4.30  | 1  | 2  | 2  | 7   | 0.794 | 0.736 | 0.730 | 0.899 | 12.14  | 4.30  | 2  | 7   | 442  | 49.5  | 9.28 |
| Q9WVD4   | H(+)/Cl(-) exchange transporter 5 OS=Mus musculus GN=Ctcs5 PE=2 SV=1 - [CLCN5_MOUSE]                                      | 8.18  | 2  | 4  | 6  | 12  | 1.194 | 0.615 | 0.648 | 0.899 | 28.73  | 8.18  | 10 | 12  | 746  | 83.0  | 7.01 |
| Q9JKB1   | Ubiquitin carboxyl-terminal hydrolase isozyme L3 OS=Mus musculus GN=Uchl3 PE=1 SV=2 - [UCHL3_MOUSE]                       | 50.87 | 2  | 10 | 10 | 99  | 1.524 | 1.025 | 1.135 | 0.899 | 301.48 | 50.87 | 20 | 99  | 230  | 26.1  | 5.05 |
| P60840-2 | Isoform 2 of Alpha-endosulfine OS=Mus musculus GN=Ensa - [ENSA_MOUSE]                                                     | 62.39 | 3  | 6  | 7  | 57  | 1.131 | 1.117 | 1.655 | 0.899 | 158.56 | 62.39 | 13 | 57  | 117  | 12.9  | 8.27 |
| Q3U1V8   | Mitogen-activated protein kinase kinase kinase 9 OS=Mus musculus GN=Map3k9 PE=2 SV=2 - [MK39_MOUSE]                       | 3.90  | 2  | 3  | 4  | 10  | 1.116 | 0.684 | 1.128 | 0.899 | 25.04  | 3.90  | 8  | 10  | 1077 | 118.7 | 5.86 |
| Q5XG71   | Small subunit processome component 20 homolog OS=Mus musculus GN=Utp20 PE=2 SV=2 - [UTP20_MOUSE]                          | 1.61  | 2  | 2  | 3  | 4   | 1.719 | 0.568 | 1.011 | 0.899 | 7.85   | 1.61  | 3  | 4   | 2788 | 317.5 | 8.09 |
| P38585   | Tubulin-tyrosine ligase OS=Mus musculus GN=Ttl PE=2 SV=2 - [TTL_MOUSE]                                                    | 16.45 | 2  | 4  | 5  | 17  | 0.780 | 0.797 | 1.027 | 0.899 | 47.93  | 16.45 | 10 | 17  | 377  | 43.1  | 6.46 |
| P70429-2 | Isoform 1 of Ena/VASP-like protein OS=Mus musculus GN=Evl - [EVL_MOUSE]                                                   | 44.78 | 4  | 16 | 16 | 63  | 0.999 | 0.938 | 0.997 | 0.899 | 174.44 | 44.78 | 25 | 63  | 393  | 42.1  | 8.35 |
| F6ZGR6   | Protein D430041D05Rik (Fragment) OS=Mus musculus GN=D430041D05Rik PE=4 SV=1 - [F6ZGR6_MOUSE]                              | 13.29 | 4  | 16 | 16 | 56  | 0.845 | 1.187 | 1.585 | 0.899 | 178.48 | 13.29 | 28 | 56  | 1678 | 181.0 | 9.38 |
| Q9QXT8   | Calsenilin OS=Mus musculus GN=Kcnp3 PE=1 SV=2 - [CSEN_MOUSE]                                                              | 30.86 | 5  | 6  | 6  | 13  | 1.578 | 0.829 | 0.814 | 0.899 | 35.27  | 30.86 | 9  | 13  | 256  | 29.4  | 5.69 |
| Q9D8M7-2 | Isoform 2 of PHD finger protein 10 OS=Mus musculus GN=Pih10 - [PHF10_MOUSE]                                               | 7.68  | 4  | 3  | 3  | 10  | 1.687 | 0.980 | 0.936 | 0.899 | 17.89  | 7.68  | 4  | 10  | 495  | 55.6  | 6.73 |
| Q9QZM0   | Ubiquitin-2 OS=Mus musculus GN=Ubqln2 PE=1 SV=2 - [UBQL2_MOUSE]                                                           | 23.82 | 1  | 7  | 11 | 189 | 1.915 | 1.216 | 0.967 | 0.899 | 574.41 | 23.82 | 21 | 189 | 638  | 67.3  | 5.22 |
| Q68EF0   | Rab-3A-interacting protein OS=Mus musculus GN=Rab3ip PE=1 SV=1 - [RAB3I_MOUSE]                                            | 27.57 | 1  | 8  | 8  | 13  | 1.010 | 0.809 | 1.192 | 0.899 | 42.90  | 27.57 | 11 | 13  | 428  | 47.1  | 6.71 |
| P54276   | DNA mismatch repair protein Msh6 OS=Mus musculus GN=Msh6 PE=1 SV=3 - [MSH6_MOUSE]                                         | 8.39  | 1  | 10 | 10 | 12  | 0.945 | 0.775 | 0.896 | 0.899 | 37.12  | 8.39  | 12 | 12  | 1358 | 151.0 | 6.73 |
| Q8CFV4   | Neurturin OS=Mus musculus GN=Nrn1 PE=1 SV=1 - [NRN1_MOUSE]                                                                | 19.01 | 2  | 3  | 3  | 17  | 0.674 | 2.177 | 2.344 | 0.899 | 61.36  | 19.01 | 6  | 17  | 142  | 15.3  | 6.99 |
| Q8CX2-2  | Isoform 2 of ER membrane protein complex subunit 1 OS=Mus musculus GN=Emc1 - [EMC1_MOUSE]                                 | 29.48 | 3  | 24 | 24 | 84  | 0.845 | 0.747 | 0.817 | 0.899 | 276.70 | 29.48 | 43 | 84  | 994  | 111.2 | 7.43 |
| G3UYG6   | PERQ amino acid-rich with GYF domain-containing protein 2 (Fragment) OS=Mus musculus GN=Gigyf2 PE=2 SV=1 - [G3UYG6_MOUSE] | 16.58 | 11 | 17 | 19 | 99  | 1.420 | 0.846 | 1.166 | 0.899 | 233.31 | 16.58 | 32 | 99  | 1285 | 148.5 | 5.57 |

|          |                                                                                                                       |       |    |    |    |     |       |       |       |       |        |       |    |     |      |       |       |
|----------|-----------------------------------------------------------------------------------------------------------------------|-------|----|----|----|-----|-------|-------|-------|-------|--------|-------|----|-----|------|-------|-------|
| A2AA71   | Protein transport protein Sec24A OS=Mus musculus GN=Sec24a PE=2 SV=1 - [A2AA71_MOUSE]                                 | 21.49 | 4  | 14 | 14 | 33  | 0.724 | 0.613 | 0.886 | 0.899 | 70.99  | 21.49 | 23 | 33  | 1089 | 118.6 | 7.83  |
| E9PX30   | Mitogen-activated protein kinase kinase kinase OS=Mus musculus GN=Map4k5 PE=2 SV=1 - [E9PX30_MOUSE]                   | 10.15 | 4  | 7  | 7  | 18  | 1.153 | 0.940 | 0.905 | 0.899 | 58.92  | 10.15 | 11 | 18  | 847  | 94.9  | 7.91  |
| Q5SVQ0-4 | Isoform 4 of Histone acetyltransferase KAT7 OS=Mus musculus GN=Kat7 - [KAT7_MOUSE]                                    | 7.40  | 5  | 3  | 3  | 9   | 0.774 | 0.619 | 0.954 | 0.899 | 25.42  | 7.40  | 6  | 9   | 581  | 66.9  | 8.72  |
| Q61160   | Protein FADD OS=Mus musculus GN=Fadd PE=1 SV=1 - [FADD_MOUSE]                                                         | 7.80  | 1  | 2  | 2  | 3   | 1.540 | 1.227 | 0.960 | 0.899 | 6.65   | 7.80  | 3  | 3   | 205  | 22.9  | 6.04  |
| P51829   | Adenylate cyclase type 7 OS=Mus musculus GN=Adcy7 PE=2 SV=2 - [ADCY7_MOUSE]                                           | 7.92  | 1  | 3  | 6  | 10  | 1.388 | 0.794 | 0.655 | 0.899 | 26.80  | 7.92  | 9  | 10  | 1099 | 122.6 | 7.87  |
| Q9Z2Y3   | Homer protein homolog 1 OS=Mus musculus GN=Homer1 PE=1 SV=2 - [HOME1_MOUSE]                                           | 60.11 | 11 | 19 | 19 | 106 | 1.150 | 1.958 | 2.211 | 0.899 | 273.72 | 60.11 | 33 | 106 | 366  | 41.4  | 5.53  |
| Q8BGH4   | Receptor expression-enhancing protein 1 OS=Mus musculus GN=Reep1 PE=1 SV=1 - [REEP1_MOUSE]                            | 40.30 | 1  | 8  | 8  | 30  | 0.845 | 0.554 | 1.025 | 0.899 | 84.31  | 40.30 | 13 | 30  | 201  | 22.3  | 9.50  |
| F7CD11   | Synaptotagmin-1 (Fragment) OS=Mus musculus GN=Synj1 PE=4 SV=1 - [F7CD11_MOUSE]                                        | 46.03 | 3  | 3  | 6  | 65  | 1.061 | 0.307 | 0.894 | 0.899 | 172.89 | 46.03 | 10 | 65  | 189  | 19.3  | 11.14 |
| Q8VDS4   | Regulation of nuclear pre-mRNA domain-containing protein 1A OS=Mus musculus GN=Rprd1a PE=2 SV=1 - [RPRD1A_MOUSE]      | 18.91 | 1  | 5  | 6  | 16  | 0.677 | 1.048 | 0.787 | 0.900 | 47.15  | 18.91 | 10 | 16  | 312  | 35.7  | 7.58  |
| B1AUN2   | MGC54442 OS=Mus musculus GN=EIF2b3 PE=4 SV=1 - [B1AUN2_MOUSE]                                                         | 33.85 | 3  | 14 | 14 | 43  | 0.757 | 0.887 | 0.859 | 0.900 | 97.98  | 33.85 | 23 | 43  | 452  | 50.5  | 6.74  |
| G3X973   | Stabilin 1, isoform CRA_a OS=Mus musculus GN=Stab1 PE=4 SV=1 - [G3X973_MOUSE]                                         | 2.88  | 3  | 3  | 4  | 5   | 0.994 | 1.416 | 0.961 | 0.900 | 12.04  | 2.88  | 5  | 5   | 2571 | 276.3 | 6.61  |
| Q6PFEE3  | DNA repair and recombination protein RAD54B OS=Mus musculus GN=Rad54b PE=2 SV=1 - [RAD54B_MOUSE]                      | 4.74  | 1  | 2  | 2  | 2   | 1.183 | 1.037 | 1.006 | 0.900 | 2.85   | 4.74  | 2  | 2   | 886  | 99.3  | 8.22  |
| Q64127-2 | Isoform Short of Transcription intermediary factor 1-alpha OS=Mus musculus GN=Trim24 - [TIF1A_MOUSE]                  | 3.74  | 3  | 4  | 4  | 5   | 0.849 | 0.721 | 0.575 | 0.900 | 11.35  | 3.74  | 5  | 5   | 1017 | 112.8 | 6.80  |
| P57716   | Nicestrin OS=Mus musculus GN=Ncstn PE=1 SV=3 - [NICA_MOUSE]                                                           | 12.99 | 1  | 8  | 8  | 27  | 0.953 | 0.878 | 0.746 | 0.900 | 77.13  | 12.99 | 14 | 27  | 708  | 78.4  | 6.09  |
| Q3TW19   | Transmembrane protein 63B OS=Mus musculus GN=Tmem63b PE=1 SV=1 - [TM63B_MOUSE]                                        | 10.70 | 6  | 9  | 9  | 19  | 0.593 | 0.908 | 0.869 | 0.900 | 49.56  | 10.70 | 12 | 19  | 832  | 94.7  | 7.49  |
| Q80TN4   | DnaJ homolog subfamily C member 16 OS=Mus musculus GN=Dnajc16 PE=1 SV=2 - [DNJC16_MOUSE]                              | 14.51 | 2  | 9  | 10 | 21  | 0.793 | 0.820 | 0.854 | 0.900 | 55.86  | 14.51 | 15 | 21  | 772  | 89.1  | 7.55  |
| Q6PAR0-2 | Isoform 2 of Kelch domain-containing protein 10 OS=Mus musculus GN=Klhdc10 - [KLD10_MOUSE]                            | 9.02  | 3  | 3  | 3  | 5   | 1.082 | 1.941 | 0.759 | 0.900 | 21.41  | 9.02  | 5  | 5   | 410  | 45.4  | 8.60  |
| Q9D8B3   | Charged multivesicular body protein 4b OS=Mus musculus GN=Chmp4b PE=2 SV=2 - [CHMP4B_MOUSE]                           | 53.13 | 2  | 11 | 11 | 68  | 0.931 | 0.466 | 1.251 | 0.900 | 197.85 | 53.13 | 21 | 68  | 224  | 24.9  | 4.82  |
| Q03137   | Ephrin type-A receptor 4 OS=Mus musculus GN=Epha4 PE=1 SV=2 - [EPHA4_MOUSE]                                           | 23.12 | 2  | 13 | 17 | 54  | 0.610 | 1.020 | 1.289 | 0.900 | 184.37 | 23.12 | 30 | 54  | 986  | 109.7 | 6.51  |
| Q64518   | Sarcoplasmic/endoplasmic reticulum calcium ATPase 3 OS=Mus musculus GN=Atp2a3 PE=2 SV=3 - [AT2A3_MOUSE]               | 12.14 | 6  | 5  | 14 | 56  | 0.851 | 1.553 | 1.063 | 0.900 | 161.27 | 12.14 | 24 | 56  | 1038 | 113.6 | 5.85  |
| Q922M7   | Ashwin OS=Mus musculus PE=1 SV=1 - [ASHWIN_MOUSE]                                                                     | 26.72 | 1  | 5  | 5  | 16  | 1.581 | 0.804 | 1.119 | 0.900 | 61.30  | 26.72 | 10 | 16  | 232  | 26.0  | 9.55  |
| Q5SUF5   | Protein Cacna1g OS=Mus musculus GN=Cacna1g PE=2 SV=1 - [Q5SUF5_MOUSE]                                                 | 4.54  | 11 | 6  | 6  | 26  | 0.750 | 0.378 | 0.815 | 0.900 | 65.20  | 4.54  | 11 | 26  | 2247 | 248.8 | 7.27  |
| Q8R2K3   | Single-stranded DNA-binding protein OS=Mus musculus GN=Ssbp1 PE=2 SV=1 - [Q8R2K3_MOUSE]                               | 60.14 | 3  | 9  | 9  | 38  | 2.351 | 1.150 | 1.226 | 0.900 | 107.64 | 60.14 | 13 | 38  | 148  | 17.1  | 9.79  |
| Q8R3R8   | Gamma-aminobutyric acid receptor-associated protein-like 1 OS=Mus musculus GN=Gabarapl1 PE=1 SV=2 - [GABARAPL1_MOUSE] | 41.03 | 1  | 2  | 6  | 16  | 1.390 | 0.852 | 1.014 | 0.900 | 49.46  | 41.03 | 8  | 16  | 117  | 14.0  | 8.73  |
| P60843   | Eukaryotic initiation factor 4A-I OS=Mus musculus GN=EIF4a1 PE=2 SV=1 - [IF4A1_MOUSE]                                 | 57.14 | 1  | 12 | 27 | 202 | 0.770 | 0.912 | 0.898 | 0.900 | 594.90 | 57.14 | 48 | 202 | 406  | 46.1  | 5.48  |

|        |                                                                                                                                  |       |    |    |    |    |       |       |       |       |        |       |    |    |      |       |       |
|--------|----------------------------------------------------------------------------------------------------------------------------------|-------|----|----|----|----|-------|-------|-------|-------|--------|-------|----|----|------|-------|-------|
| Q6P5B5 | Fragile X mental retardation syndrome-related protein 2 OS=Mus musculus GN=Fx2 PE=2 SV=1 - [Q6P5B5_MOUSE]                        | 34.72 | 2  | 14 | 19 | 60 | 0.899 | 0.802 | 0.878 | 0.900 | 197.95 | 34.72 | 32 | 60 | 674  | 74.2  | 6.23  |
| O55241 | Orexin OS=Mus musculus GN=Hcrt PE=2 SV=1 - [ORFX_MOUSE]                                                                          | 13.08 | 1  | 1  | 1  | 5  | 1.189 | 0.753 | 0.882 | 0.901 | 8.76   | 13.08 | 2  | 5  | 130  | 13.5  | 9.70  |
| Q91Y86 | Mitogen-activated protein kinase 8 OS=Mus musculus GN=Mapk8 PE=1 SV=1 -                                                          | 40.10 | 12 | 4  | 13 | 64 | 1.670 | 1.549 | 0.893 | 0.901 | 174.65 | 40.10 | 24 | 64 | 384  | 44.2  | 7.69  |
| Q922P9 | Putative oxidoreductase GLYR1 OS=Mus musculus GN=Glyr1 PE=2 SV=1 - [GLYR1_MOUSE]                                                 | 13.74 | 2  | 6  | 6  | 26 | 0.587 | 0.781 | 0.878 | 0.901 | 85.40  | 13.74 | 11 | 26 | 546  | 59.7  | 9.22  |
| Q7TSI3 | Serine/threonine-protein phosphatase 6 regulatory subunit 1 OS=Mus musculus GN=Ppp6r1 PE=1 SV=1 -                                | 22.90 | 1  | 12 | 13 | 42 | 1.521 | 1.193 | 1.309 | 0.901 | 111.77 | 22.90 | 21 | 42 | 856  | 94.5  | 4.64  |
| Q9WTX2 | Interferon-inducible double stranded RNA-dependent protein kinase activator A OS=Mus musculus GN=Prkra PE=1 SV=1 - [PRKRA_MOUSE] | 31.95 | 1  | 9  | 9  | 38 | 0.925 | 0.605 | 0.707 | 0.901 | 99.61  | 31.95 | 18 | 38 | 313  | 34.3  | 8.43  |
| P97449 | Aminopeptidase N OS=Mus musculus GN=Anpep PE=1 SV=4 - [AMPN_MOUSE]                                                               | 23.19 | 1  | 19 | 19 | 88 | 0.829 | 2.295 | 0.810 | 0.901 | 267.38 | 23.19 | 34 | 88 | 966  | 109.6 | 5.90  |
| Q8VD29 | Sodium/potassium/calcium exchanger 3 OS=Mus musculus GN=Slc24a3 PE=2 SV=1 - [Q8VD29_MOUSE]                                       | 2.69  | 2  | 2  | 2  | 3  | 0.525 | 0.819 | 0.693 | 0.901 | 6.77   | 2.69  | 2  | 3  | 595  | 66.0  | 4.88  |
| Q9CZG9 | PDZ domain-containing protein 11 OS=Mus musculus GN=Pdzd11 PE=1 SV=1 -                                                           | 79.29 | 1  | 7  | 8  | 33 | 1.457 | 1.207 | 0.968 | 0.901 | 97.98  | 79.29 | 15 | 33 | 140  | 16.2  | 7.14  |
| D3YU55 | Protein Rasa2 OS=Mus musculus GN=Rasa2 PE=2 SV=1 - [D3YU55_MOUSE]                                                                | 29.42 | 6  | 25 | 30 | 82 | 1.099 | 1.026 | 1.172 | 0.901 | 218.25 | 29.42 | 46 | 82 | 1261 | 141.9 | 7.80  |
| Q9R0N3 | Synaptotagmin-11 OS=Mus musculus GN=Sytt11 PE=2 SV=2 - [SYT11_MOUSE]                                                             | 30.00 | 2  | 10 | 10 | 39 | 0.916 | 0.523 | 0.850 | 0.901 | 114.07 | 30.00 | 18 | 39 | 430  | 48.3  | 9.11  |
| Q911A2 | Conserved oligomeric Golgi complex subunit 8 OS=Mus musculus GN=Cog8 PE=2 SV=3 - [COG8_MOUSE]                                    | 22.19 | 2  | 11 | 11 | 19 | 0.688 | 0.890 | 0.719 | 0.901 | 50.56  | 22.19 | 17 | 19 | 640  | 71.6  | 5.19  |
| Q9WTK3 | Glycosylphosphatidylinositol of anchor attachment 1 protein OS=Mus musculus GN=Gpaal1 PE=1 SV=3 - [GPAAL1_MOUSE]                 | 9.18  | 4  | 4  | 4  | 9  | 0.251 | 0.519 | 0.785 | 0.901 | 27.37  | 9.18  | 6  | 9  | 621  | 67.9  | 8.40  |
| Q8BUB4 | WD repeat and FYVE domain-containing protein 2 OS=Mus musculus GN=Wdfy2 PE=2 SV=2 - [WDFY2_MOUSE]                                | 5.25  | 1  | 2  | 2  | 3  | 0.929 | 0.821 | 0.743 | 0.901 | 10.09  | 5.25  | 2  | 3  | 400  | 45.1  | 6.81  |
| Q6PDH0 | Pleckstrin homology-like domain family B member 1 OS=Mus musculus GN=Phldb1 PE=1 SV=1 - [PHLB1_MOUSE]                            | 29.03 | 14 | 31 | 31 | 88 | 1.056 | 0.616 | 1.017 | 0.901 | 241.98 | 29.03 | 53 | 88 | 1371 | 150.0 | 8.87  |
| Q68FE6 | Protein FAM65A OS=Mus musculus GN=Fam65a PE=1 SV=2 - [FAM65A_MOUSE]                                                              | 14.80 | 1  | 13 | 13 | 28 | 0.854 | 0.968 | 0.904 | 0.901 | 91.79  | 14.80 | 18 | 28 | 1223 | 132.3 | 5.88  |
| Q99J77 | N-acetylneuraminic acid synthase (Sialic acid synthase) OS=Mus musculus GN=Nans PE=2 SV=1 - [Q99J77_MOUSE]                       | 44.01 | 1  | 15 | 15 | 56 | 1.029 | 0.904 | 0.838 | 0.901 | 155.26 | 44.01 | 25 | 56 | 359  | 40.0  | 7.06  |
| Q9D517 | 1-acyl-sn-glycerol-3-phosphate acyltransferase gamma OS=Mus musculus GN=Agpat3 PE=1 SV=2 - [PLCC_MOUSE]                          | 32.18 | 1  | 14 | 14 | 48 | 0.659 | 0.761 | 0.821 | 0.902 | 133.34 | 32.18 | 24 | 48 | 376  | 43.3  | 8.51  |
| D3YVR9 | MCG7316, isoform CRA_b OS=Mus musculus GN=1110004F10rik PE=4 SV=1 - [D3YVR9_MOUSE]                                               | 17.52 | 3  | 3  | 3  | 28 | 1.376 | 0.983 | 1.097 | 0.902 | 114.74 | 17.52 | 6  | 28 | 137  | 15.2  | 4.65  |
| A2A547 | 60S ribosomal protein L19 OS=Mus musculus GN=Rpl19 PE=2 SV=1 - [A2A547_MOUSE]                                                    | 36.60 | 2  | 8  | 10 | 82 | 0.652 | 0.647 | 0.773 | 0.902 | 166.36 | 36.60 | 18 | 82 | 194  | 23.2  | 11.47 |
| Q6P5F6 | Zinc transporter ZIP10 OS=Mus musculus GN=Slc39a10 PE=1 SV=1 - [S39AA_MOUSE]                                                     | 15.61 | 2  | 11 | 11 | 45 | 0.713 | 1.112 | 1.098 | 0.902 | 119.25 | 15.61 | 18 | 45 | 833  | 94.3  | 6.71  |
| Q61249 | Immunoglobulin-binding protein 1 OS=Mus musculus GN=Igbp1 PE=1 SV=1 - [IGBP1_MOUSE]                                              | 27.06 | 1  | 10 | 10 | 41 | 1.309 | 0.999 | 1.040 | 0.902 | 102.40 | 27.06 | 18 | 41 | 340  | 38.9  | 6.18  |
| O35593 | 26S proteasome non-ATPase regulatory subunit 14 OS=Mus musculus GN=Psm14 PE=1 SV=2 - [PSDE_MOUSE]                                | 56.45 | 1  | 13 | 13 | 59 | 0.692 | 0.926 | 0.816 | 0.902 | 170.88 | 56.45 | 22 | 59 | 310  | 34.6  | 6.52  |
| A2A6Q8 | Myosin light chain 4 (Fragment) OS=Mus musculus GN=My4 PE=2 SV=1 - [A2A6Q8_MOUSE]                                                | 36.46 | 3  | 6  | 6  | 14 | 0.966 | 1.042 | 1.732 | 0.902 | 29.65  | 36.46 | 9  | 14 | 192  | 21.1  | 5.03  |

|          |                                                                                                                                    |       |   |    |    |     |       |       |       |       |        |       |    |     |      |       |      |
|----------|------------------------------------------------------------------------------------------------------------------------------------|-------|---|----|----|-----|-------|-------|-------|-------|--------|-------|----|-----|------|-------|------|
| Q8BT17   | Serine/threonine-protein phosphatase 6 regulatory ankyrin repeat subunit C OS=Mus musculus GN=Ankrd52 PE=2 SV=1 - [ANRS2_MOUSE]    | 2.70  | 2 | 2  | 3  | 5   | 1.354 | 0.810 | 0.707 | 0.902 | 15.40  | 2.70  | 5  | 5   | 1076 | 115.0 | 6.54 |
| D3YXK0   | MCG4624, isoform CRA_c OS=Mus musculus GN=Jakmp2 PE=4 SV=2 - [D3YXK0_MOUSE]                                                        | 23.78 | 1 | 14 | 16 | 43  | 1.031 | 0.881 | 1.236 | 0.902 | 118.86 | 23.78 | 26 | 43  | 820  | 96.3  | 5.97 |
| B2RY58   | Hyperpolarization-activated, cyclic nucleotide-gated K+ 4 OS=Mus musculus GN=Hcn4 PE=2 SV=1 - [B2RY58_MOUSE]                       | 20.90 | 2 | 10 | 18 | 78  | 1.237 | 0.786 | 0.926 | 0.902 | 233.19 | 20.90 | 33 | 78  | 1201 | 129.0 | 9.04 |
| Q8CI08   | SLAIN motif-containing protein 2 OS=Mus musculus GN=Slain2 PE=1 SV=2 - [SLAI2_MOUSE]                                               | 16.70 | 2 | 7  | 7  | 17  | 1.658 | 0.962 | 1.262 | 0.902 | 49.74  | 16.70 | 10 | 17  | 581  | 62.3  | 9.47 |
| P42337   | Phosphatidylinositol 4,5-bisphosphate 3-kinase catalytic subunit alpha isoform OS=Mus musculus GN=Plk3ca PE=1 SV=2 - [PK3CA_MOUSE] | 8.33  | 4 | 8  | 8  | 16  | 0.773 | 0.769 | 0.849 | 0.902 | 48.76  | 8.33  | 13 | 16  | 1068 | 124.3 | 7.15 |
| Q8BU88   | 39S ribosomal protein L22, mitochondrial OS=Mus musculus GN=Mpl22 PE=2 SV=1 - [RM22_MOUSE]                                         | 24.76 | 1 | 5  | 5  | 14  | 0.724 | 0.694 | 0.794 | 0.902 | 38.90  | 24.76 | 8  | 14  | 206  | 23.8  | 9.86 |
| Q922V4   | Pleiotropic regulator 1 OS=Mus musculus GN=Plrg1 PE=2 SV=1 - [PLRG1_MOUSE]                                                         | 28.27 | 3 | 9  | 9  | 49  | 1.304 | 0.942 | 0.935 | 0.902 | 151.80 | 28.27 | 17 | 49  | 513  | 56.9  | 9.17 |
| G5E8S8   | MAGUK p55 subfamily member 7 OS=Mus musculus GN=Mpp7 PE=4 SV=1 - [G5E8S8_MOUSE]                                                    | 11.98 | 4 | 7  | 8  | 11  | 1.212 | 0.803 | 1.091 | 0.902 | 23.87  | 11.98 | 10 | 11  | 576  | 65.5  | 7.30 |
| O70591   | Prefoldin subunit 2 OS=Mus musculus GN=Pfdn2 PE=2 SV=2 - [PFD2_MOUSE]                                                              | 57.14 | 2 | 9  | 9  | 57  | 1.526 | 0.946 | 1.154 | 0.902 | 157.13 | 57.14 | 16 | 57  | 154  | 16.5  | 6.58 |
| Q9JLV2-2 | Isoform 2 of Short transient receptor potential channel 4-associated protein OS=Mus musculus GN=Trpc4ap - [TP4AP_MOUSE]            | 1.77  | 2 | 1  | 1  | 2   | 0.815 | 0.824 | 0.775 | 0.902 | 5.04   | 1.77  | 2  | 2   | 789  | 89.9  | 7.59 |
| Q8CDU6   | Probable E3 ubiquitin-protein ligase HECTD2 OS=Mus musculus GN=Hectd2 PE=2 SV=2 - [HECD2_MOUSE]                                    | 3.49  | 3 | 2  | 2  | 3   | 1.715 | 1.265 | 1.121 | 0.902 | 8.99   | 3.49  | 3  | 3   | 774  | 87.7  | 7.88 |
| Q99ME2   | WD repeat-containing protein 6 OS=Mus musculus GN=Wdr6 PE=2 SV=1 - [WDR6_MOUSE]                                                    | 10.40 | 1 | 10 | 10 | 29  | 1.196 | 1.433 | 0.698 | 0.902 | 78.99  | 10.40 | 16 | 29  | 1125 | 121.8 | 6.98 |
| Q9CX97   | WD repeat-containing protein 55 OS=Mus musculus GN=Wdr55 PE=2 SV=2 -                                                               | 4.64  | 1 | 2  | 2  | 3   | 1.714 | 0.928 | 0.794 | 0.902 | 7.53   | 4.64  | 3  | 3   | 388  | 42.6  | 4.89 |
| Q3UFK1   | Coiled-coil domain containing 28A OS=Mus musculus GN=Ccdc28a PE=2 SV=1 -                                                           | 69.57 | 5 | 8  | 8  | 24  | 0.681 | 0.568 | 1.606 | 0.902 | 87.18  | 69.57 | 13 | 24  | 184  | 20.3  | 8.12 |
| Q9CQT5   | Proteasome maturation protein OS=Mus musculus GN=Pomp PE=2 SV=1 - [POMP_MOUSE]                                                     | 25.53 | 1 | 3  | 3  | 4   | 1.617 | 1.273 | 0.954 | 0.902 | 15.88  | 25.53 | 4  | 4   | 141  | 15.8  | 5.49 |
| Q9D619   | Leucine rich adaptor protein 1 OS=Mus musculus GN=Lurap1 PE=2 SV=1 -                                                               | 20.92 | 1 | 4  | 4  | 7   | 1.186 | 1.052 | 1.162 | 0.902 | 19.23  | 20.92 | 6  | 7   | 239  | 25.8  | 4.72 |
| O35969   | Guanidinoacetate N-methyltransferase OS=Mus musculus GN=Gamt PE=1 SV=1 - [GAMT_MOUSE]                                              | 22.88 | 2 | 4  | 4  | 12  | 0.904 | 0.411 | 0.650 | 0.902 | 49.62  | 22.88 | 8  | 12  | 236  | 26.3  | 5.71 |
| Q8K4R4-2 | Isoform 2 of Cytoplasmic phosphatidylinositol transfer protein 1 OS=Mus musculus GN=Pltpnc1 - [PITC1_MOUSE]                        | 30.22 | 3 | 1  | 10 | 30  | 0.625 | 0.610 | 0.790 | 0.902 | 80.73  | 30.22 | 17 | 30  | 268  | 31.8  | 5.64 |
| Q91WN1   | DnaJ homolog subfamily C member 9 OS=Mus musculus GN=Dnajc9 PE=2 SV=2 -                                                            | 28.96 | 1 | 6  | 7  | 16  | 1.266 | 1.045 | 1.278 | 0.903 | 39.44  | 28.96 | 10 | 16  | 259  | 30.0  | 5.94 |
| P56818   | Beta-secretase 1 OS=Mus musculus GN=Bace1 PE=1 SV=2 - [BACE1_MOUSE]                                                                | 10.78 | 3 | 4  | 4  | 10  | 0.564 | 0.972 | 0.820 | 0.903 | 25.21  | 10.78 | 8  | 10  | 501  | 55.7  | 5.60 |
| B0V2M3   | Zinc finger protein 318 OS=Mus musculus GN=Zfp318 PE=2 SV=1 - [B0V2M3_MOUSE]                                                       | 1.79  | 3 | 2  | 4  | 8   | 0.854 | 0.759 | 1.179 | 0.903 | 22.34  | 1.79  | 4  | 8   | 2237 | 246.2 | 7.01 |
| Q8K0H5   | Transcription initiation factor TFIID subunit 10 OS=Mus musculus GN=Taf10 PE=1 SV=1 - [TAF10_MOUSE]                                | 11.47 | 1 | 1  | 1  | 6   | 1.958 | 1.111 | 1.218 | 0.903 | 33.03  | 11.47 | 2  | 6   | 218  | 21.8  | 6.55 |
| O35668   | Huntingtin-associated protein 1 OS=Mus musculus GN=Hap1 PE=1 SV=1 - [HAP1_MOUSE]                                                   | 50.64 | 5 | 27 | 27 | 136 | 1.104 | 1.120 | 0.619 | 0.903 | 395.72 | 50.64 | 46 | 136 | 628  | 70.1  | 4.74 |
| P56376   | Acylphosphatase-1 OS=Mus musculus GN=Acyp1 PE=2 SV=2 - [ACYP1_MOUSE]                                                               | 73.74 | 2 | 8  | 9  | 49  | 2.431 | 0.879 | 1.200 | 0.903 | 139.70 | 73.74 | 18 | 49  | 99   | 11.2  | 9.04 |



|          |                                                                                                                                    |       |    |    |    |     |       |       |       |       |        |       |     |     |      |       |      |
|----------|------------------------------------------------------------------------------------------------------------------------------------|-------|----|----|----|-----|-------|-------|-------|-------|--------|-------|-----|-----|------|-------|------|
| G5E924   | Heterogeneous nuclear ribonucleoprotein L (Fragment) OS=Mus musculus GN=Hnimpl PE=4 SV=1 -                                         | 56.75 | 5  | 23 | 23 | 282 | 0.925 | 0.950 | 0.941 | 0.903 | 809.60 | 56.75 | 42  | 282 | 615  | 66.9  | 8.18 |
| Q0VBL6   | Hypoxia-inducible factor 3-alpha OS=Mus musculus GN=Hif3a PE=1 SV=2 - [HIF3A_MOUSE]                                                | 1.81  | 2  | 1  | 2  | 2   | 0.439 | 0.805 | 0.752 | 0.903 | 4.37   | 1.81  | 2   | 2   | 662  | 73.0  | 8.34 |
| Q80XH2-2 | Isoform 2 of Interphotoreceptor matrix proteoglycan 2 OS=Mus musculus GN=Impg2 - [IMPG2_MOUSE]                                     | 1.23  | 2  | 1  | 1  | 1   | 2.055 | 1.112 | 1.177 | 0.903 | 2.37   | 1.23  | 1   | 1   | 1134 | 126.6 | 4.78 |
| Q99P15   | Phosphatidate phosphatase LPIN2 OS=Mus musculus GN=Lpin2 PE=1 SV=2 -                                                               | 6.38  | 4  | 4  | 6  | 11  | 1.110 | 1.269 | 1.167 | 0.903 | 27.51  | 6.38  | 10  | 11  | 893  | 99.6  | 5.47 |
| Q9E552-2 | Isoform 2 of Phosphatidylinositol 3,4,5-trisphosphatase 5 OS=Mus musculus GN=Imp5d - [IMP5D_MOUSE]                                 | 3.03  | 8  | 3  | 4  | 11  | 1.067 | 1.127 | 0.964 | 0.903 | 24.26  | 3.03  | 7   | 11  | 1190 | 133.4 | 7.80 |
| Q9D9Z5   | DET1- and DDB1-associated protein 1 OS=Mus musculus GN=Dda1 PE=2 SV=1 -                                                            | 26.47 | 2  | 3  | 3  | 8   | 1.418 | 1.010 | 1.115 | 0.903 | 21.36  | 26.47 | 5   | 8   | 102  | 11.7  | 8.68 |
| P63005   | Platelet-activating factor acetylhydrolase IB subunit alpha OS=Mus musculus GN=Pafah1b1 PE=1 SV=2 [L1S1_MOUSE]                     | 62.68 | 3  | 23 | 24 | 138 | 1.678 | 0.861 | 0.857 | 0.903 | 450.16 | 62.68 | 40  | 138 | 410  | 46.6  | 7.37 |
| Q8VHK9   | Probable ATP-dependent RNA helicase DHX36 OS=Mus musculus GN=Dhx36 PE=2 SV=2 - [DHX36_MOUSE]                                       | 19.58 | 1  | 14 | 16 | 39  | 1.191 | 0.792 | 0.821 | 0.903 | 111.39 | 19.58 | 25  | 39  | 1001 | 113.8 | 8.29 |
| P55302   | Alpha-2-macroglobulin receptor-associated protein OS=Mus musculus GN=Lrpap1 PE=1 SV=1 - [AMRP_MOUSE]                               | 47.78 | 3  | 20 | 21 | 103 | 1.818 | 1.156 | 1.264 | 0.903 | 305.49 | 47.78 | 35  | 103 | 360  | 42.2  | 7.87 |
| E9PVA8   | Protein Gcn111 OS=Mus musculus GN=Gcn111 PE=2 SV=1 - [E9PVA8_MOUSE]                                                                | 33.99 | 2  | 78 | 80 | 216 | 0.681 | 0.825 | 0.690 | 0.903 | 623.43 | 33.99 | 133 | 216 | 2671 | 292.8 | 7.36 |
| Q9CZR2   | N-acetylated-alpha-linked acidic dipeptidase 2 OS=Mus musculus GN=Naalad2 PE=1 SV=2 - [NALD2_MOUSE]                                | 4.46  | 2  | 3  | 3  | 11  | 1.034 | 0.895 | 0.738 | 0.903 | 20.69  | 4.46  | 6   | 11  | 740  | 82.7  | 8.37 |
| F7B135   | Synaptojanin-2 (Fragment) OS=Mus musculus GN=Synj2 PE=2 SV=1 - [F7B135_MOUSE]                                                      | 10.07 | 15 | 5  | 6  | 17  | 1.069 | 0.453 | 0.920 | 0.903 | 46.18  | 10.07 | 8   | 17  | 725  | 80.7  | 8.62 |
| Q05921   | 2-5A-dependent ribonuclease OS=Mus musculus GN=Rnasel PE=2 SV=2 -                                                                  | 3.81  | 1  | 3  | 3  | 4   | 1.996 | 1.337 | 0.986 | 0.903 | 6.41   | 3.81  | 4   | 4   | 735  | 83.2  | 6.55 |
| Q8BGV7   | BTB/POZ domain-containing adapter for CUL3-mediated RhoA degradation protein 1 OS=Mus musculus GN=Kctd13 PE=2 SV=1 - [BACD1_MOUSE] | 13.07 | 2  | 3  | 4  | 9   | 1.030 | 1.098 | 1.033 | 0.904 | 27.41  | 13.07 | 7   | 9   | 329  | 36.4  | 6.99 |
| Q3TCN2   | Putative phospholipase B-like 2 OS=Mus musculus GN=Pibd2 PE=1 SV=2 - [PLBL2_MOUSE]                                                 | 11.95 | 2  | 5  | 5  | 24  | 2.513 | 0.833 | 0.873 | 0.904 | 87.00  | 11.95 | 9   | 24  | 594  | 66.2  | 6.13 |
| Q9JM96   | Cdc42 effector protein 4 OS=Mus musculus GN=Cdc42ep4 PE=1 SV=1 - [BORG4_MOUSE]                                                     | 41.26 | 3  | 10 | 10 | 45  | 1.520 | 0.867 | 1.376 | 0.904 | 164.09 | 41.26 | 18  | 45  | 349  | 37.8  | 5.36 |
| J3QP68   | Uncharacterized protein OS=Mus musculus GN=Gm4204 PE=3 SV=1 - [J3QP68_MOUSE]                                                       | 33.62 | 3  | 9  | 9  | 53  | 1.158 | 1.024 | 1.361 | 0.904 | 169.08 | 33.62 | 16  | 53  | 354  | 41.1  | 4.55 |
| G5E8G3   | MCG9827 OS=Mus musculus GN=Opcml PE=4 SV=1 - [G5E8G3_MOUSE]                                                                        | 42.03 | 1  | 1  | 15 | 116 | 0.501 | 0.691 | 1.067 | 0.904 | 349.66 | 42.03 | 28  | 116 | 345  | 38.0  | 6.87 |
| Q3TN34   | JRAB OS=Mus musculus GN=Mical2 PE=1 SV=1 - [Q3TN34_MOUSE]                                                                          | 13.28 | 2  | 8  | 10 | 24  | 1.561 | 0.640 | 0.925 | 0.904 | 69.75  | 13.28 | 18  | 24  | 1009 | 108.2 | 9.55 |
| Q80U93   | Nuclear pore complex protein Nup214 OS=Mus musculus GN=Nup214 PE=1 SV=2 - [NU214_MOUSE]                                            | 16.12 | 2  | 25 | 25 | 62  | 1.263 | 1.014 | 1.017 | 0.904 | 177.35 | 16.12 | 40  | 62  | 2085 | 212.8 | 7.08 |
| Q92457   | Sprouty-related, EVH1 domain-containing protein 2 OS=Mus musculus GN=Spred2 PE=1 SV=1 - [SPRE2_MOUSE]                              | 16.59 | 3  | 4  | 5  | 11  | 1.603 | 1.176 | 1.061 | 0.904 | 36.95  | 16.59 | 8   | 11  | 410  | 46.8  | 6.81 |
| Q8C0C0   | Zinc fingers and homeoboxes protein 2 OS=Mus musculus GN=Zhx2 PE=1 SV=1 - [ZHX2_MOUSE]                                             | 5.14  | 1  | 4  | 4  | 7   | 1.281 | 0.868 | 0.888 | 0.904 | 18.73  | 5.14  | 6   | 7   | 836  | 92.2  | 7.46 |
| Q8BKX1-4 | Isoform 4 of Brain-specific angiogenesis inhibitor 1-associated protein 2 OS=Mus musculus GN=Baiap2 - [BAIAP2_MOUSE]               | 73.24 | 1  | 1  | 30 | 223 | 0.729 | 2.384 | 2.967 | 0.904 | 713.04 | 73.24 | 51  | 223 | 482  | 53.2  | 8.98 |
| Q3UYK3   | TBC1 domain family member 9 OS=Mus musculus GN=Tbc1d9 PE=2 SV=2 -                                                                  | 3.09  | 2  | 2  | 4  | 9   | 0.676 | 0.766 | 0.769 | 0.904 | 22.22  | 3.09  | 6   | 9   | 1264 | 142.9 | 5.34 |

|          |                                                                                                                        |       |   |    |    |    |        |       |       |       |        |       |    |    |      |       |      |
|----------|------------------------------------------------------------------------------------------------------------------------|-------|---|----|----|----|--------|-------|-------|-------|--------|-------|----|----|------|-------|------|
| P70257-1 | Isoform NFIX1 of Nuclear factor 1 X-type OS=Mus musculus GN=Nfix - [NFIX_MOUSE]                                        | 15.87 | 6 | 3  | 4  | 10 | 1.023  | 1.381 | 0.853 | 0.904 | 35.91  | 15.87 | 7  | 10 | 441  | 48.8  | 8.47 |
| O70342   | Neuropeptide Y receptor type 5 OS=Mus musculus GN=Npy5r PE=2 SV=2 - [NPY5R_MOUSE]                                      | 2.15  | 1 | 1  | 1  | 1  | 0.412  | 1.257 | 1.647 | 0.904 | 0.00   | 2.15  | 1  | 1  | 466  | 52.8  | 8.94 |
| Q6P1H4   | Exostoses (Multiple)-like 3 OS=Mus musculus GN=Extl3 PE=2 SV=1 - [Q6P1H4_MOUSE]                                        | 6.31  | 2 | 5  | 6  | 10 | 0.553  | 0.943 | 0.893 | 0.904 | 25.44  | 6.31  | 10 | 10 | 919  | 104.5 | 6.57 |
| Q6PD21   | SH2 domain-containing adapter protein B OS=Mus musculus GN=Shb PE=1 SV=2 - [SHB_MOUSE]                                 | 13.72 | 4 | 5  | 5  | 5  | 1.229  | 0.853 | 1.257 | 0.905 | 14.09  | 13.72 | 5  | 5  | 503  | 54.7  | 8.78 |
| Q7M6Z0   | Reticulon-4 receptor-like 2 OS=Mus musculus GN=Rtn4rl2 PE=2 SV=1 - [R4RL2_MOUSE]                                       | 17.14 | 2 | 7  | 7  | 32 | 0.955  | 2.127 | 1.059 | 0.905 | 73.72  | 17.14 | 14 | 32 | 420  | 46.0  | 7.65 |
| Q8BWM0   | Prostaglandin E synthase 2 OS=Mus musculus GN=Ptges2 PE=1 SV=3 - [PGES2_MOUSE]                                         | 57.81 | 1 | 15 | 15 | 51 | 0.748  | 0.704 | 0.777 | 0.905 | 144.04 | 57.81 | 27 | 51 | 384  | 43.3  | 9.00 |
| Q8VD63   | Testis-specific Y-encoded-like protein 4 OS=Mus musculus GN=Tspy4 PE=1 SV=1 - [TSYL4_MOUSE]                            | 23.89 | 1 | 6  | 7  | 25 | 1.372  | 0.889 | 0.901 | 0.905 | 73.41  | 23.89 | 12 | 25 | 406  | 44.8  | 6.99 |
| Q8C985-2 | Isoform 2b of Neurexin-3-beta OS=Mus musculus GN=Nrxn3 - [NRX3_MOUSE]                                                  | 29.26 | 3 | 2  | 14 | 40 | 1.271  | 1.518 | 0.981 | 0.905 | 120.91 | 29.26 | 26 | 40 | 564  | 62.0  | 9.31 |
| Q8RSK2-2 | Isoform 2 of Ubiquitin carboxyl-terminal hydrolase 33 OS=Mus musculus GN=Usp33 - [UBP33_MOUSE]                         | 6.88  | 3 | 4  | 5  | 7  | 1.342  | 0.913 | 0.934 | 0.905 | 15.18  | 6.88  | 6  | 7  | 901  | 101.8 | 5.68 |
| P23591   | GDP-L-fucose synthase OS=Mus musculus GN=Tsta3 PE=2 SV=3 - [FCL_MOUSE]                                                 | 21.18 | 1 | 5  | 5  | 17 | 1.114  | 0.853 | 0.891 | 0.905 | 59.66  | 21.18 | 9  | 17 | 321  | 35.9  | 6.74 |
| Q9CQP3   | Coiled-coil-helix-coiled-coil-helix domain-containing protein 5 OS=Mus musculus GN=Chchd5 PE=2 SV=1 - [CHCHD5_MOUSE]   | 31.82 | 1 | 3  | 3  | 7  | 1.227  | 0.835 | 0.893 | 0.905 | 21.43  | 31.82 | 5  | 7  | 110  | 12.3  | 7.31 |
| Q640M6   | Glycerophosphodiester phosphodiesterase domain-containing protein 5 OS=Mus musculus GN=Gdpd5 PE=2 SV=1 - [GDPD5_MOUSE] | 10.38 | 1 | 5  | 5  | 11 | 0.329  | 0.814 | 1.244 | 0.905 | 29.77  | 10.38 | 10 | 11 | 607  | 68.8  | 8.00 |
| Q68ED7   | CREB-regulated transcription coactivator 1 OS=Mus musculus GN=Crtc1 PE=2 SV=1 - [CRTC1_MOUSE]                          | 20.63 | 1 | 9  | 9  | 48 | 1.366  | 1.378 | 1.701 | 0.905 | 158.28 | 20.63 | 17 | 48 | 630  | 66.9  | 6.05 |
| Q81ZX4   | Splicing factor 45 OS=Mus musculus GN=Rbm17 PE=1 SV=1 - [SPF45_MOUSE]                                                  | 42.22 | 3 | 15 | 16 | 36 | 1.345  | 0.799 | 1.020 | 0.905 | 93.85  | 42.22 | 24 | 36 | 405  | 45.3  | 5.82 |
| Q99J62   | Replication factor C subunit 4 OS=Mus musculus GN=Rfc4 PE=1 SV=1 - [RFC4_MOUSE]                                        | 15.66 | 4 | 6  | 6  | 9  | 1.145  | 1.326 | 0.892 | 0.905 | 20.42  | 15.66 | 9  | 9  | 364  | 39.8  | 6.70 |
| E9PXC2   | Upstream stimulatory factor 2 OS=Mus musculus GN=Usf2 PE=2 SV=1 - [E9PXC2_MOUSE]                                       | 13.95 | 7 | 2  | 3  | 11 | 1.728  | 1.660 | 1.194 | 0.905 | 30.69  | 13.95 | 5  | 11 | 215  | 24.0  | 5.86 |
| Q61687   | Transcriptional regulator ATRX OS=Mus musculus GN=Atrx PE=1 SV=3 - [ATRX_MOUSE]                                        | 6.34  | 8 | 12 | 12 | 25 | 0.748  | 1.285 | 1.325 | 0.905 | 74.31  | 6.34  | 16 | 25 | 2476 | 278.4 | 6.68 |
| Q9D842-2 | Isoform 2 of Aprataxin and PNK-like factor OS=Mus musculus GN=Apf1 - [APLF_MOUSE]                                      | 7.42  | 3 | 2  | 2  | 4  | 16.210 | 1.553 | 1.156 | 0.905 | 12.39  | 7.42  | 2  | 4  | 391  | 43.0  | 5.07 |
| E0CYF6   | Protein AW554918 OS=Mus musculus GN=AW554918 PE=4 SV=1 - [E0CYF6_MOUSE]                                                | 13.75 | 1 | 1  | 1  | 2  | 0.674  | 6.100 | 0.785 | 0.905 | 5.16   | 13.75 | 1  | 2  | 80   | 8.4   | 6.70 |
| Q9Z1F9   | SUMO-activating enzyme subunit 2 OS=Mus musculus GN=Uba2 PE=2 SV=1 - [SAE2_MOUSE]                                      | 47.18 | 5 | 23 | 23 | 79 | 0.702  | 0.970 | 0.807 | 0.905 | 198.76 | 47.18 | 37 | 79 | 638  | 70.5  | 5.24 |
| E9Q0F0   | Protein Krt78 OS=Mus musculus GN=Krt78 PE=2 SV=1 - [E9Q0F0_MOUSE]                                                      | 3.37  | 2 | 2  | 4  | 19 | 2.818  | 1.625 | 1.500 | 0.905 | 44.23  | 3.37  | 5  | 19 | 1068 | 112.2 | 7.97 |
| Q7TN29   | Stromal membrane-associated protein 2 OS=Mus musculus GN=Smap2 PE=1 SV=1 - [SMAP2_MOUSE]                               | 32.48 | 2 | 11 | 12 | 42 | 1.299  | 0.883 | 1.182 | 0.905 | 143.61 | 32.48 | 20 | 42 | 428  | 46.5  | 8.87 |
| E9Q9Q6   | Protein Cdh18 OS=Mus musculus GN=Cdh18 PE=2 SV=1 - [E9Q9Q6_MOUSE]                                                      | 16.58 | 4 | 9  | 9  | 24 | 0.939  | 0.857 | 0.883 | 0.905 | 52.29  | 16.58 | 15 | 24 | 790  | 87.9  | 5.16 |
| P02104   | Hemoglobin subunit epsilon-Y2 OS=Mus musculus GN=Hbb-y PE=1 SV=2 - [HBE_MOUSE]                                         | 17.01 | 4 | 1  | 3  | 30 | 2.475  | 2.348 | 0.433 | 0.905 | 73.97  | 17.01 | 6  | 30 | 147  | 16.1  | 8.18 |
| Q9EPV8   | Ubiquitin-like protein 5 OS=Mus musculus GN=Ubl5 PE=1 SV=1 - [UBL5_MOUSE]                                              | 79.45 | 7 | 6  | 6  | 15 | 1.574  | 0.705 | 0.844 | 0.905 | 41.00  | 79.45 | 9  | 15 | 73   | 8.5   | 8.44 |

|          |                                                                                                                                       |       |    |    |    |     |       |       |       |       |        |       |     |     |      |       |       |
|----------|---------------------------------------------------------------------------------------------------------------------------------------|-------|----|----|----|-----|-------|-------|-------|-------|--------|-------|-----|-----|------|-------|-------|
| Q8C2Q3   | RNA-binding protein 14<br>OS=Mus musculus<br>GN=Rbm14 PE=1 SV=1 -<br>[RBM14_MOUSE]                                                    | 37.52 | 6  | 18 | 22 | 121 | 1.227 | 0.719 | 1.009 | 0.905 | 368.20 | 37.52 | 40  | 121 | 669  | 69.4  | 9.67  |
| E0CZD9   | Zinc finger protein-like 1<br>(Fragment) OS=Mus<br>musculus GN=Zfp11 PE=2<br>SV=1 - [E0CZD9_MOUSE]                                    | 9.92  | 7  | 2  | 2  | 8   | 0.659 | 0.958 | 0.843 | 0.905 | 25.75  | 9.92  | 4   | 8   | 242  | 26.8  | 7.11  |
| Q8JZL3   | Thiamine-triphosphatase<br>OS=Mus musculus<br>GN=Thtpa PE=1 SV=3 -<br>[THTPA_MOUSE]                                                   | 25.89 | 1  | 5  | 6  | 15  | 1.738 | 0.878 | 0.912 | 0.905 | 52.79  | 25.89 | 8   | 15  | 224  | 24.2  | 4.72  |
| P50544   | Very long-chain specific<br>acyl-CoA dehydrogenase,<br>mitochondrial OS=Mus<br>musculus GN=Acadvl<br>PE=1 SV=3 -<br>[ACADV_MOUSE]     | 57.77 | 2  | 31 | 31 | 133 | 1.106 | 0.900 | 0.716 | 0.906 | 395.68 | 57.77 | 57  | 133 | 656  | 70.8  | 8.75  |
| Q9D0R8   | Protein LSM12 homolog<br>OS=Mus musculus<br>GN=Lsm12 PE=1 SV=1 -<br>[LSM12_MOUSE]                                                     | 22.56 | 1  | 4  | 4  | 17  | 1.375 | 0.901 | 1.060 | 0.906 | 50.62  | 22.56 | 7   | 17  | 195  | 21.7  | 7.74  |
| Q9D287   | Pre-mRNA-splicing factor<br>SPF27 OS=Mus musculus<br>GN=Bcas2 PE=2 SV=1 -<br>[SPF27_MOUSE]                                            | 29.33 | 1  | 6  | 6  | 17  | 1.235 | 0.984 | 0.934 | 0.906 | 52.22  | 29.33 | 10  | 17  | 225  | 26.1  | 5.66  |
| O70340   | Neuronal pentraxin-2<br>OS=Mus musculus<br>GN=Npbt2 PE=2 SV=1 -<br>[NPTX2_MOUSE]                                                      | 29.14 | 1  | 10 | 11 | 39  | 0.921 | 1.270 | 0.888 | 0.906 | 105.19 | 29.14 | 17  | 39  | 429  | 47.1  | 5.81  |
| Q8VE80   | THO complex subunit 3<br>OS=Mus musculus<br>GN=Thoc3 PE=2 SV=1 -<br>[THOC3_MOUSE]                                                     | 21.94 | 1  | 7  | 7  | 13  | 1.447 | 1.065 | 1.053 | 0.906 | 37.53  | 21.94 | 11  | 13  | 351  | 38.7  | 6.09  |
| P60762-2 | Isoform 2 of Mortality<br>factor 4-like protein 1<br>OS=Mus musculus<br>GN=Morf4l1 -                                                  | 11.15 | 2  | 4  | 4  | 7   | 0.725 | 0.607 | 0.826 | 0.906 | 16.56  | 11.15 | 6   | 7   | 323  | 37.2  | 9.19  |
| Q8BW55   | G protein-regulated<br>inducer of neurite<br>outgrowth 3 OS=Mus<br>musculus GN=Gprin3<br>PE=1 SV=1 -                                  | 48.10 | 1  | 25 | 26 | 91  | 1.026 | 0.659 | 1.628 | 0.906 | 259.30 | 48.10 | 40  | 91  | 763  | 80.4  | 7.02  |
| Q0PMG2   | MAM domain-containing<br>glycosylphosphatidylinositol<br>anchor protein 1 OS=Mus<br>musculus GN=Mdga1<br>PE=2 SV=2 -<br>[MDGA1_MOUSE] | 15.74 | 6  | 11 | 11 | 31  | 0.738 | 0.814 | 0.723 | 0.906 | 81.68  | 15.74 | 20  | 31  | 940  | 104.1 | 8.31  |
| Q8BJW6   | Eukaryotic translation<br>initiation factor 2A<br>OS=Mus musculus<br>GN=Eif2a PE=2 SV=2 -<br>[EIF2A_MOUSE]                            | 31.84 | 5  | 14 | 14 | 36  | 0.980 | 0.574 | 0.878 | 0.906 | 83.57  | 31.84 | 23  | 36  | 581  | 64.4  | 8.91  |
| Q9CQV6   | Microtubule-associated<br>proteins 1A/1B light chain<br>3B OS=Mus musculus<br>GN=Map1lc3b PE=1 SV=3<br>- [MLP3B_MOUSE]                | 22.40 | 3  | 1  | 3  | 37  | 2.889 | 1.125 | 1.132 | 0.906 | 83.38  | 22.40 | 6   | 37  | 125  | 14.6  | 8.43  |
| Q8BU30   | Isoleucine-tRNA ligase,<br>cytoplasmic OS=Mus<br>musculus GN=lars PE=2<br>SV=2 - [SYIC_MOUSE]                                         | 29.64 | 3  | 32 | 32 | 82  | 0.614 | 0.785 | 0.776 | 0.906 | 215.37 | 29.64 | 51  | 82  | 1262 | 144.2 | 6.55  |
| Q99LX5   | Multiple myeloma tumor-<br>associated protein 2<br>homolog OS=Mus<br>musculus GN=Mntag2<br>PE=2 SV=1 -                                | 5.38  | 1  | 1  | 1  | 3   | 0.865 | 0.841 | 0.759 | 0.906 | 8.99   | 5.38  | 2   | 3   | 260  | 29.3  | 9.86  |
| P58501   | PAX3- and PAX7-binding<br>protein 1 OS=Mus<br>musculus GN=Paxbp1<br>PE=1 SV=3 -                                                       | 2.29  | 3  | 3  | 3  | 11  | 0.560 | 0.598 | 0.864 | 0.906 | 25.96  | 2.29  | 5   | 11  | 919  | 104.8 | 5.67  |
| D3Z131   | THO complex subunit 6<br>homolog OS=Mus<br>musculus GN=Thoc6 PE=2<br>SV=1 - [D3Z131_MOUSE]                                            | 7.09  | 4  | 2  | 2  | 6   | 1.128 | 1.111 | 0.772 | 0.906 | 18.32  | 7.09  | 4   | 6   | 296  | 32.7  | 7.11  |
| F6YRI7   | Calcium/calmodulin-<br>dependent protein kinase<br>type 1G (Fragment)<br>OS=Mus musculus<br>GN=Camk1g PE=4 SV=1 -                     | 6.75  | 3  | 1  | 1  | 2   | 1.606 | 1.000 | 0.995 | 0.906 | 2.86   | 6.75  | 2   | 2   | 252  | 29.0  | 5.54  |
| Q9DCR2   | AP-3 complex subunit<br>sigma-1 OS=Mus<br>musculus GN=Ap3s1 PE=1<br>SV=2 - [AP3S1_MOUSE]                                              | 26.42 | 1  | 4  | 5  | 24  | 0.639 | 1.063 | 0.847 | 0.906 | 63.02  | 26.42 | 9   | 24  | 193  | 21.7  | 5.39  |
| E0CYB8   | Probable<br>palmitoyltransferase<br>ZDHHC24 OS=Mus<br>musculus GN=Zdhhc24<br>PE=2 SV=1 -                                              | 6.67  | 2  | 1  | 1  | 1   | 0.736 | 1.015 | 1.054 | 0.906 | 0.00   | 6.67  | 1   | 1   | 105  | 10.8  | 10.24 |
| Q9DAJ5-2 | Isoform 2 of Dynein light<br>chain roadblock-type 2<br>OS=Mus musculus<br>GN=Dynlrb2 -                                                | 18.82 | 2  | 1  | 1  | 2   | 0.668 | 0.599 | 0.466 | 0.906 | 5.92   | 18.82 | 2   | 2   | 85   | 9.6   | 8.56  |
| Q8BWC6   | Neubulette (Fragment)<br>OS=Mus musculus<br>GN=Nbl1 PE=2 SV=2 -<br>[Q8BWC6_MOUSE]                                                     | 3.35  | 3  | 1  | 1  | 1   | 1.082 | 1.556 | 1.683 | 0.906 | 0.00   | 3.35  | 1   | 1   | 448  | 51.7  | 6.86  |
| P49025-3 | Isoform 3 of Citron Rho-<br>interacting kinase OS=Mus<br>musculus GN=Cit -<br>[CTRO_MOUSE]                                            | 44.08 | 10 | 73 | 74 | 258 | 1.064 | 0.677 | 1.115 | 0.906 | 741.11 | 44.08 | 128 | 258 | 1597 | 183.3 | 6.61  |
| Q8V175   | Importin-4 OS=Mus<br>musculus GN=Ipo4 PE=1<br>SV=1 - [IPO4_MOUSE]                                                                     | 22.92 | 3  | 19 | 19 | 64  | 0.531 | 0.822 | 0.629 | 0.906 | 172.10 | 22.92 | 36  | 64  | 1082 | 119.2 | 5.03  |

|          |                                                                                                                                         |       |     |    |    |     |       |       |       |       |        |       |    |     |      |       |      |
|----------|-----------------------------------------------------------------------------------------------------------------------------------------|-------|-----|----|----|-----|-------|-------|-------|-------|--------|-------|----|-----|------|-------|------|
| Q5U4C3   | Splicing factor, arginine/serine-rich 19<br>OS=Mus musculus<br>GN=Scaf1 PE=1 SV=1 -                                                     | 9.08  | 1   | 7  | 7  | 17  | 1.078 | 1.197 | 0.928 | 0.906 | 41.50  | 9.08  | 10 | 17  | 1256 | 133.8 | 9.45 |
| J3QQ00   | Homer protein homolog 3 (Fragment)<br>OS=Mus musculus<br>GN=Homer3 PE=4 SV=1 -<br>[J3QQ00_MOUSE]                                        | 60.22 | 1   | 1  | 7  | 18  | 1.062 | 0.643 | 0.914 | 0.906 | 39.79  | 60.22 | 13 | 18  | 93   | 10.7  | 4.98 |
| Q5RL57   | A kinase (PRKA) anchor protein 8-like<br>OS=Mus musculus<br>GN=Akap8l PE=2 SV=1 -                                                       | 6.55  | 2   | 4  | 4  | 8   | 0.583 | 1.022 | 1.114 | 0.907 | 29.51  | 6.55  | 6  | 8   | 641  | 71.3  | 5.06 |
| Q61137-2 | Isoform 2 of Astrotactin-1<br>OS=Mus musculus<br>GN=Astn1 -<br>[ASTN1_MOUSE]                                                            | 24.81 | 3   | 23 | 23 | 89  | 0.765 | 1.220 | 1.139 | 0.907 | 307.13 | 24.81 | 39 | 89  | 1294 | 143.9 | 5.15 |
| P58871   | 182 kDa tankyrase-1-binding protein<br>OS=Mus musculus<br>GN=Tnks1bp1 PE=1 SV=2 -<br>[TB182_MOUSE]                                      | 39.19 | 1   | 49 | 49 | 184 | 1.356 | 1.340 | 1.538 | 0.907 | 536.53 | 39.19 | 85 | 184 | 1720 | 181.7 | 4.88 |
| G3UZ2    | Ubiquitin-conjugating enzyme E2 G2 (Fragment)<br>OS=Mus musculus<br>GN=Ube2g2 PE=2 SV=1 -<br>[G3UZ2_MOUSE]                              | 52.11 | 2   | 3  | 3  | 6   | 0.747 | 1.274 | 0.832 | 0.907 | 19.49  | 52.11 | 5  | 6   | 71   | 7.8   | 4.50 |
| Q8BQY8   | Checkpoint protein HUS1<br>OS=Mus musculus<br>GN=Hus1 PE=2 SV=1 -<br>[HUS1_MOUSE]                                                       | 4.64  | 3   | 1  | 1  | 1   | 1.519 | 1.489 | 0.953 | 0.907 | 2.43   | 4.64  | 1  | 1   | 280  | 31.7  | 7.37 |
| Q8K2A4   | MCG140700, isoform CRA_c<br>OS=Mus musculus<br>GN=Zfp87 PE=2 SV=1 -<br>[Q8K2A4_MOUSE]                                                   | 4.81  | 145 | 1  | 2  | 2   | 0.649 | 0.799 | 0.779 | 0.907 | 4.27   | 4.81  | 2  | 2   | 540  | 63.0  | 8.53 |
| Q9Z275   | Retinaldehyde-binding protein 1<br>OS=Mus musculus<br>GN=Rlbp1 PE=2 SV=3 -<br>[RLBP1_MOUSE]                                             | 35.02 | 1   | 9  | 9  | 24  | 1.165 | 1.616 | 1.459 | 0.907 | 76.83  | 35.02 | 17 | 24  | 317  | 36.4  | 5.06 |
| Q8R0N6   | Hydroxyacid-oxoacid transhydrogenase, mitochondrial<br>OS=Mus musculus<br>GN=Adhfe1 PE=2 SV=2 -<br>[ADHFE1_MOUSE]                       | 25.81 | 2   | 8  | 8  | 29  | 1.812 | 0.984 | 0.638 | 0.907 | 93.10  | 25.81 | 14 | 29  | 465  | 49.9  | 7.58 |
| Q64010   | Adapter molecule crk<br>OS=Mus musculus<br>GN=Crk PE=1 SV=1 -<br>[CRK_MOUSE]                                                            | 63.16 | 6   | 17 | 17 | 93  | 2.082 | 1.256 | 1.037 | 0.907 | 282.39 | 63.16 | 32 | 93  | 304  | 33.8  | 5.55 |
| D3Z6X7   | Transmembrane 9 superfamily member 1<br>OS=Mus musculus<br>GN=Tm9sf1 PE=2 SV=1 -<br>[D3Z6X7_MOUSE]                                      | 2.72  | 6   | 2  | 2  | 3   | 1.170 | 0.721 | 1.060 | 0.907 | 6.29   | 2.72  | 3  | 3   | 589  | 66.9  | 6.98 |
| O70378   | ER membrane protein complex subunit 8<br>OS=Mus musculus<br>GN=Emc8 PE=1 SV=1 -<br>[EMC8_MOUSE]                                         | 64.25 | 7   | 11 | 11 | 55  | 0.983 | 0.855 | 0.792 | 0.907 | 160.09 | 64.25 | 21 | 55  | 207  | 23.3  | 6.15 |
| B2RXR6   | Serine/threonine-protein phosphatase 6 regulatory ankyrin repeat subunit B<br>OS=Mus musculus<br>GN=Ankr44 PE=2 SV=1 -<br>[ANR44_MOUSE] | 4.53  | 4   | 3  | 4  | 8   | 1.072 | 0.802 | 0.713 | 0.907 | 27.82  | 4.53  | 6  | 8   | 993  | 107.3 | 6.42 |
| P43247   | DNA mismatch repair protein Msh2<br>OS=Mus musculus<br>GN=Msh2 PE=2 SV=1 -<br>[MSH2_MOUSE]                                              | 13.37 | 3   | 11 | 12 | 26  | 0.597 | 0.842 | 0.734 | 0.907 | 75.16  | 13.37 | 19 | 26  | 935  | 104.1 | 5.96 |
| Q9R1P0   | Proteasome subunit alpha type-4<br>OS=Mus musculus<br>GN=Psm4 PE=1 SV=1 -<br>[PSA4_MOUSE]                                               | 41.76 | 3   | 10 | 11 | 56  | 1.535 | 0.913 | 0.860 | 0.907 | 167.79 | 41.76 | 20 | 56  | 261  | 29.5  | 7.72 |
| Q9D0Q7   | 39S ribosomal protein L45, mitochondrial<br>OS=Mus musculus<br>GN=Mrip45 PE=2 SV=1 -<br>[RM45_MOUSE]                                    | 26.47 | 2   | 11 | 11 | 25  | 0.711 | 0.670 | 0.832 | 0.907 | 67.53  | 26.47 | 18 | 25  | 306  | 35.4  | 9.23 |
| Q9WVQ5   | Methylthionibulose-1-phosphate dehydratase<br>OS=Mus musculus<br>GN=Apip PE=1 SV=1 -<br>[MTNB_MOUSE]                                    | 58.09 | 1   | 9  | 9  | 31  | 1.489 | 0.781 | 0.868 | 0.907 | 97.61  | 58.09 | 14 | 31  | 241  | 26.9  | 6.90 |
| E9PVU9   | Bis(5'-adenosyl)-triphosphatase (Fragment)<br>OS=Mus musculus<br>GN=Fhit PE=2 SV=1 -<br>[E9PVU9_MOUSE]                                  | 39.52 | 5   | 6  | 6  | 27  | 1.894 | 1.092 | 0.910 | 0.907 | 90.78  | 39.52 | 9  | 27  | 124  | 14.2  | 7.68 |
| P51141   | Segment polarity protein dishevelled homolog DVL-1<br>OS=Mus musculus<br>GN=Dvl1 PE=1 SV=2 -<br>[DVL1_MOUSE]                            | 17.41 | 1   | 6  | 8  | 15  | 0.972 | 0.761 | 0.952 | 0.907 | 39.83  | 17.41 | 13 | 15  | 695  | 75.3  | 7.02 |
| Q9R1E6   | Ectonucleotide pyrophosphatase/phosphodiesterase family member 2<br>OS=Mus musculus<br>GN=Enpp2 PE=1 SV=3 -<br>[ENPP2_MOUSE]            | 17.05 | 4   | 11 | 12 | 26  | 2.248 | 0.490 | 0.714 | 0.907 | 87.65  | 17.05 | 19 | 26  | 862  | 98.8  | 7.27 |
| Q9QZ26   | Potassium voltage-gated channel subfamily E member 1-like protein<br>OS=Mus musculus<br>GN=Kcne1l PE=2 SV=1 -<br>[KCNEL_MOUSE]          | 5.59  | 1   | 1  | 1  | 4   | 1.193 | 0.717 | 0.649 | 0.907 | 15.56  | 5.59  | 2  | 4   | 143  | 15.0  | 5.41 |
| F6UHR6   | Oxysterol-binding protein<br>OS=Mus musculus<br>GN=Osbp9 PE=2 SV=2 -<br>[F6UHR6_MOUSE]                                                  | 16.69 | 6   | 9  | 9  | 15  | 0.875 | 0.940 | 0.914 | 0.907 | 46.33  | 16.69 | 12 | 15  | 719  | 81.0  | 5.72 |

|          |                                                                                                                                      |       |   |    |    |     |       |       |       |       |         |       |    |     |      |       |      |
|----------|--------------------------------------------------------------------------------------------------------------------------------------|-------|---|----|----|-----|-------|-------|-------|-------|---------|-------|----|-----|------|-------|------|
| E9Q0M7   | Protein Atp11b OS=Mus musculus GN=Atp11b PE=2 SV=1 - [E9Q0M7_MOUSE]                                                                  | 6.78  | 3 | 5  | 6  | 21  | 1.893 | 1.323 | 0.867 | 0.907 | 49.59   | 6.78  | 8  | 21  | 841  | 95.3  | 6.24 |
| Q9Z160   | Conserved oligomeric Golgi complex subunit 1 OS=Mus musculus GN=Cog1 PE=2 SV=3 - [COG1_MOUSE]                                        | 17.55 | 5 | 9  | 11 | 26  | 0.762 | 0.787 | 0.844 | 0.907 | 77.79   | 17.55 | 20 | 26  | 980  | 109.0 | 7.18 |
| Q61771   | Kinesin-like protein KIF3B OS=Mus musculus GN=Kif3b PE=1 SV=1 - [KIF3B_MOUSE]                                                        | 26.91 | 2 | 13 | 19 | 77  | 0.747 | 0.753 | 1.380 | 0.907 | 232.78  | 26.91 | 33 | 77  | 747  | 85.2  | 7.69 |
| Q8C0M9   | Isoaspartyl peptidase/L-asparaginase OS=Mus musculus GN=Asrgl1 PE=1 SV=1 - [ASGL1_MOUSE]                                             | 62.27 | 1 | 16 | 16 | 176 | 1.743 | 0.828 | 0.915 | 0.907 | 512.18  | 62.27 | 31 | 176 | 326  | 33.9  | 7.65 |
| Q80TA9   | Ectopic P granules protein 5 homolog OS=Mus musculus GN=Epg5 PE=2 SV=2 - [EPG5_MOUSE]                                                | 6.88  | 1 | 13 | 13 | 29  | 1.457 | 1.096 | 0.963 | 0.908 | 65.30   | 6.88  | 20 | 29  | 2572 | 290.6 | 6.37 |
| P61982   | 14-3-3 protein gamma OS=Mus musculus GN=Ywhag PE=1 SV=2 - [1433G_MOUSE]                                                              | 72.87 | 2 | 15 | 22 | 764 | 1.515 | 1.120 | 0.882 | 0.908 | 2122.95 | 72.87 | 36 | 764 | 247  | 28.3  | 4.89 |
| Q9CT10   | Ran-binding protein 3 OS=Mus musculus GN=Ranbp3 PE=1 SV=2 - [RANB3_MOUSE]                                                            | 27.29 | 1 | 11 | 11 | 41  | 1.257 | 0.814 | 1.012 | 0.908 | 114.43  | 27.29 | 18 | 41  | 491  | 52.5  | 5.12 |
| P54754   | Ephrin type-B receptor 3 OS=Mus musculus GN=Ephb3 PE=1 SV=2 - [EPHB3_MOUSE]                                                          | 19.94 | 3 | 9  | 16 | 35  | 1.205 | 0.852 | 1.076 | 0.908 | 97.02   | 19.94 | 24 | 35  | 993  | 109.6 | 6.28 |
| E9QAS4   | Chromodomain-helicase-DNA-binding protein 4 OS=Mus musculus GN=Chd4 PE=2 SV=1 - [E9QAS4_MOUSE]                                       | 15.09 | 5 | 15 | 26 | 60  | 0.856 | 0.949 | 0.917 | 0.908 | 162.84  | 15.09 | 38 | 60  | 1902 | 216.2 | 5.92 |
| Q5SW19   | Clustered mitochondria protein homolog OS=Mus musculus GN=Cluh PE=2 SV=2 - [CLUJ_MOUSE]                                              | 20.38 | 3 | 22 | 23 | 78  | 0.840 | 0.726 | 0.804 | 0.908 | 204.29  | 20.38 | 38 | 78  | 1315 | 148.0 | 6.02 |
| Q9CQG2   | Methyltransferase-like protein 16 OS=Mus musculus GN=Metb16 PE=1 SV=1 -                                                              | 10.31 | 3 | 4  | 4  | 10  | 0.866 | 0.905 | 0.636 | 0.908 | 29.15   | 10.31 | 6  | 10  | 553  | 62.3  | 7.36 |
| P49769   | Presenilin-1 OS=Mus musculus GN=Psen1 PE=1 SV=1 - [PSN1_MOUSE]                                                                       | 13.92 | 2 | 4  | 5  | 12  | 0.908 | 0.934 | 0.893 | 0.908 | 37.73   | 13.92 | 8  | 12  | 467  | 52.6  | 5.38 |
| Q9R0C8   | Guanine nucleotide exchange factor VAV3 OS=Mus musculus GN=Vav3 PE=1 SV=2 -                                                          | 8.15  | 5 | 4  | 5  | 10  | 0.672 | 0.524 | 0.823 | 0.908 | 18.03   | 8.15  | 9  | 10  | 847  | 97.9  | 7.06 |
| Q3UEX0   | Transmembrane protein 109 OS=Mus musculus GN=Tmem109 PE=1 SV=2 - [TM109_MOUSE]                                                       | 13.99 | 8 | 5  | 5  | 16  | 0.592 | 1.450 | 0.929 | 0.908 | 42.63   | 13.99 | 8  | 16  | 243  | 26.3  | 9.89 |
| Q922B2   | Aspartate--tRNA ligase, cytoplasmic OS=Mus musculus GN=Dars PE=2 SV=2 - [SYDC_MOUSE]                                                 | 55.49 | 2 | 26 | 26 | 135 | 0.697 | 0.753 | 0.785 | 0.908 | 321.46  | 55.49 | 46 | 135 | 501  | 57.1  | 6.49 |
| Q9DC40   | Telomere length regulation protein TEL2 homolog OS=Mus musculus GN=Tel2 PE=1 SV=2 - [TELO2_MOUSE]                                    | 3.33  | 1 | 3  | 3  | 5   | 0.795 | 1.078 | 0.850 | 0.908 | 11.11   | 3.33  | 5  | 5   | 840  | 93.3  | 5.25 |
| O55057   | Retinal rod rhodopsin-sensitive cGMP 3',5'-cyclic phosphodiesterase subunit delta OS=Mus musculus GN=Pde6d PE=1 SV=1 - [PDE6D_MOUSE] | 28.67 | 2 | 3  | 3  | 22  | 1.715 | 0.984 | 0.722 | 0.908 | 84.62   | 28.67 | 5  | 22  | 150  | 17.3  | 5.67 |
| Q9Z2A7   | Diacylglycerol O-acyltransferase 1 OS=Mus musculus GN=Dgat1 PE=1 SV=1 - [DGAT1_MOUSE]                                                | 13.25 | 3 | 5  | 5  | 19  | 0.829 | 0.727 | 0.829 | 0.908 | 80.81   | 13.25 | 9  | 19  | 498  | 56.8  | 9.39 |
| Q8BHJ5   | F-box-like/WD repeat-containing protein TBL1XR1 OS=Mus musculus GN=Tbl1xr1 PE=2 SV=1 - [TBL1XR1_MOUSE]                               | 16.73 | 1 | 3  | 6  | 13  | 2.002 | 1.211 | 0.955 | 0.908 | 41.38   | 16.73 | 9  | 13  | 514  | 55.6  | 5.63 |
| Q0V8T7   | Contactin-associated protein like 5-3 OS=Mus musculus GN=Cntnap5c PE=2 SV=1 -                                                        | 4.29  | 1 | 2  | 5  | 14  | 1.051 | 1.451 | 1.015 | 0.908 | 39.74   | 4.29  | 9  | 14  | 1305 | 146.1 | 5.97 |
| Q8BTE5   | Protein 1110001A16Rik OS=Mus musculus GN=1110001A16Rik PE=4 SV=2 - [Q8BTE5_MOUSE]                                                    | 36.25 | 1 | 3  | 3  | 7   | 1.308 | 1.507 | 1.054 | 0.908 | 15.48   | 36.25 | 6  | 7   | 80   | 9.3   | 9.45 |
| Q9WTS2   | Alpha-(1,6)-fucosyltransferase OS=Mus musculus GN=Put8 PE=2 SV=2 -                                                                   | 18.96 | 1 | 11 | 11 | 25  | 0.926 | 0.850 | 0.773 | 0.908 | 55.37   | 18.96 | 16 | 25  | 575  | 66.5  | 7.52 |
| Q8K3I4   | Rab effector MyRIP OS=Mus musculus GN=Myrip PE=1 SV=1 - [MYRIP_MOUSE]                                                                | 12.62 | 2 | 8  | 8  | 23  | 0.960 | 0.689 | 1.157 | 0.908 | 57.82   | 12.62 | 13 | 23  | 856  | 94.9  | 6.07 |
| Q8K0C9   | GDP-mannose 4,6 dehydratase OS=Mus musculus GN=Gm5 PE=2 SV=1 - [GM5_MOUSE]                                                           | 38.17 | 2 | 14 | 14 | 36  | 1.360 | 1.037 | 0.812 | 0.908 | 93.89   | 38.17 | 22 | 36  | 372  | 42.0  | 7.03 |
| Q9D0E1-2 | Isoform 2 of Heterogeneous nuclear ribonucleoprotein M OS=Mus musculus GN=Hnmpm - [HNMPM_MOUSE]                                      | 58.84 | 6 | 38 | 38 | 227 | 0.909 | 0.978 | 0.893 | 0.908 | 694.02  | 58.84 | 69 | 227 | 690  | 73.7  | 8.75 |

|          |                                                                                                                        |       |   |    |    |     |       |       |       |       |        |       |    |     |      |       |       |
|----------|------------------------------------------------------------------------------------------------------------------------|-------|---|----|----|-----|-------|-------|-------|-------|--------|-------|----|-----|------|-------|-------|
| O55033   | Cytoplasmic protein NCK2<br>OS=Mus musculus<br>GN=Nck2 PE=1 SV=1 -<br>[NCK2_MOUSE]                                     | 43.16 | 1 | 12 | 13 | 37  | 1.204 | 0.949 | 1.304 | 0.908 | 110.34 | 43.16 | 22 | 37  | 380  | 42.9  | 6.95  |
| Q9EQ61   | Pescadillo homolog<br>OS=Mus musculus<br>GN=Pes1 PE=1 SV=1 -<br>[PESC_MOUSE]                                           | 3.60  | 2 | 2  | 2  | 3   | 0.488 | 0.614 | 0.622 | 0.909 | 5.43   | 3.60  | 3  | 3   | 584  | 67.8  | 6.84  |
| Q6P5D4   | Centrosomal protein of<br>135 kDa OS=Mus<br>musculus GN=Cep135<br>PE=1 SV=1 -                                          | 10.00 | 1 | 8  | 12 | 32  | 1.328 | 0.934 | 1.633 | 0.909 | 69.57  | 10.00 | 16 | 32  | 1140 | 133.3 | 6.48  |
| Q782A7   | Nucleosome assembly<br>protein 1-like 4 OS=Mus<br>musculus GN=Nap1H<br>PE=1 SV=1 -                                     | 32.27 | 1 | 11 | 11 | 60  | 1.428 | 0.764 | 0.984 | 0.909 | 208.12 | 32.27 | 19 | 60  | 375  | 42.7  | 4.67  |
| P41241   | Tyrosine-protein kinase<br>CSK OS=Mus musculus<br>GN=Csk PE=1 SV=2 -<br>[CSK_MOUSE]                                    | 37.56 | 2 | 13 | 15 | 37  | 1.117 | 0.819 | 0.689 | 0.909 | 105.55 | 37.56 | 26 | 37  | 450  | 50.7  | 7.06  |
| P06837   | Neuromodulin OS=Mus<br>musculus GN=Gap43<br>PE=1 SV=1 -<br>[NEUM_MOUSE]                                                | 51.98 | 1 | 10 | 11 | 148 | 1.258 | 0.960 | 1.037 | 0.909 | 400.28 | 51.98 | 16 | 148 | 227  | 23.6  | 4.73  |
| Q8R4U7   | Leucine zipper protein 1<br>OS=Mus musculus<br>GN=Luzp1 PE=1 SV=2 -<br>[LUZP1_MOUSE]                                   | 47.19 | 2 | 43 | 43 | 128 | 1.551 | 0.426 | 1.185 | 0.909 | 400.71 | 47.19 | 68 | 128 | 1068 | 119.2 | 7.99  |
| P70459   | ETS domain-containing<br>transcription factor ERF<br>OS=Mus musculus GN=Erf<br>PE=2 SV=1 -<br>[ERF_MOUSE]              | 6.90  | 1 | 1  | 2  | 4   | 1.002 | 1.215 | 1.181 | 0.909 | 9.72   | 6.90  | 4  | 4   | 551  | 59.0  | 7.28  |
| Q9D2D7-3 | Isoform 3 of Zinc finger<br>protein 687 OS=Mus<br>musculus GN=Znf687 -<br>[ZNF687_MOUSE]                               | 7.23  | 3 | 2  | 2  | 3   | 0.574 | 0.844 | 0.800 | 0.909 | 9.16   | 7.23  | 3  | 3   | 775  | 80.9  | 6.38  |
| Q77PM6   | Fibronectin type III and<br>SPRY domain-containing<br>protein 1 OS=Mus<br>musculus GN=Fsd1 PE=2<br>SV=1 - [FSD1_MOUSE] | 42.74 | 2 | 19 | 19 | 86  | 0.847 | 0.678 | 0.743 | 0.909 | 274.27 | 42.74 | 34 | 86  | 496  | 55.5  | 6.67  |
| Q8R1S4-2 | Isoform 2 of Metastasis<br>suppressor protein 1<br>OS=Mus musculus<br>GN=Mtss1 -                                       | 15.91 | 7 | 9  | 11 | 35  | 2.295 | 0.764 | 1.000 | 0.909 | 74.57  | 15.91 | 16 | 35  | 723  | 78.8  | 7.15  |
| Q5Y5T5   | Probable<br>palmitoyltransferase<br>ZDHC8 OS=Mus<br>musculus GN=Zdhhc8<br>PE=1 SV=1 -<br>[ZDHC8_MOUSE]                 | 13.65 | 1 | 7  | 8  | 21  | 1.073 | 1.292 | 1.105 | 0.909 | 70.36  | 13.65 | 14 | 21  | 762  | 82.0  | 9.38  |
| Q4LDF6   | Protein Cthr2 (Precursor)<br>OS=Mus musculus<br>GN=Cthr2 PE=2 SV=1 -<br>[Q4LDF6_MOUSE]                                 | 19.28 | 1 | 2  | 5  | 18  | 2.637 | 2.021 | 0.715 | 0.909 | 58.49  | 19.28 | 9  | 18  | 332  | 37.9  | 7.69  |
| Q9DC71   | 28S ribosomal protein S15,<br>mitochondrial OS=Mus<br>musculus GN=Mtprs15<br>PE=2 SV=2 -<br>[RT15_MOUSE]               | 21.32 | 1 | 6  | 6  | 12  | 0.775 | 0.906 | 0.921 | 0.909 | 27.97  | 21.32 | 10 | 12  | 258  | 29.4  | 10.13 |
| Q8BYC6   | Serine/threonine-protein<br>kinase TAO3 OS=Mus<br>musculus GN=Taok3 PE=1<br>SV=2 - [TAOK3_MOUSE]                       | 12.14 | 3 | 6  | 12 | 23  | 0.999 | 0.962 | 0.970 | 0.909 | 49.79  | 12.14 | 18 | 23  | 898  | 105.3 | 7.36  |
| Q78PY7   | Staphylococcal nuclease<br>domain-containing protein<br>1 OS=Mus musculus<br>GN=Snd1 PE=1 SV=1 -<br>[SND1_MOUSE]       | 42.97 | 3 | 35 | 35 | 168 | 0.801 | 0.899 | 0.770 | 0.909 | 482.04 | 42.97 | 66 | 168 | 910  | 102.0 | 7.43  |
| Q61592   | Growth arrest-specific<br>protein 6 OS=Mus<br>musculus GN=Gas6 PE=2<br>SV=2 - [GAS6_MOUSE]                             | 1.93  | 1 | 1  | 1  | 2   | 2.639 | 1.274 | 0.587 | 0.909 | 4.63   | 1.93  | 2  | 2   | 674  | 74.6  | 5.52  |
| E9Q6K3   | Protein Pibf1 OS=Mus<br>musculus GN=Pibf1 PE=2<br>SV=1 - [E9Q6K3_MOUSE]                                                | 2.65  | 1 | 2  | 3  | 7   | 0.638 | 0.625 | 0.872 | 0.909 | 15.99  | 2.65  | 4  | 7   | 756  | 89.5  | 6.16  |
| Q8K449   | ATP-binding cassette sub-<br>family A member 9<br>OS=Mus musculus<br>GN=Abca9 PE=1 SV=2 -<br>[ABCA9_MOUSE]             | 2.65  | 4 | 4  | 4  | 6   | 1.422 | 1.346 | 1.007 | 0.909 | 17.45  | 2.65  | 6  | 6   | 1623 | 183.0 | 6.93  |
| A2AW15   | Tau-tubulin kinase 2<br>OS=Mus musculus<br>GN=Ttk2 PE=2 SV=1 -<br>[A2AW15_MOUSE]                                       | 17.76 | 4 | 6  | 15 | 37  | 1.550 | 0.611 | 0.952 | 0.909 | 104.56 | 17.76 | 25 | 37  | 1312 | 144.4 | 7.65  |
| Q3TC46   | Protein PAT1 homolog 1<br>OS=Mus musculus<br>GN=Pat1 PE=1 SV=2 -<br>[PAT1_MOUSE]                                       | 7.53  | 1 | 5  | 5  | 7   | 1.386 | 0.692 | 0.843 | 0.909 | 17.84  | 7.53  | 6  | 7   | 770  | 86.7  | 6.37  |
| Q80U72   | Protein scribble homolog<br>OS=Mus musculus<br>GN=Scrib PE=1 SV=2 -<br>[SCRIB_MOUSE]                                   | 20.97 | 6 | 21 | 24 | 49  | 1.109 | 0.774 | 0.853 | 0.910 | 135.47 | 20.97 | 37 | 49  | 1612 | 174.0 | 5.12  |
| Q8BKY8   | mTERF domain-containing<br>protein 3, mitochondrial<br>OS=Mus musculus<br>GN=Mterf3 PE=1 SV=1 -<br>[MTER3_MOUSE]       | 15.58 | 2 | 5  | 6  | 13  | 1.072 | 1.026 | 0.760 | 0.910 | 30.84  | 15.58 | 11 | 13  | 385  | 43.4  | 8.94  |
| D3Z2J4   | AKT-interacting protein<br>(Fragment) OS=Mus<br>musculus GN=Aktip PE=2<br>SV=1 - [D3Z2J4_MOUSE]                        | 15.75 | 3 | 2  | 2  | 9   | 0.794 | 0.984 | 0.902 | 0.910 | 37.21  | 15.75 | 4  | 9   | 273  | 30.8  | 9.28  |
| Q8VOK1-2 | Isoform 2 of Nitrilase<br>homolog 1 OS=Mus<br>musculus GN=Nit1 -<br>[NIT1_MOUSE]                                       | 52.76 | 5 | 12 | 12 | 33  | 1.913 | 1.003 | 0.778 | 0.910 | 88.63  | 52.76 | 21 | 33  | 290  | 31.9  | 7.05  |

|          |                                                                                                                                                                                        |       |   |    |    |     |       |        |       |       |        |       |    |     |      |       |      |
|----------|----------------------------------------------------------------------------------------------------------------------------------------------------------------------------------------|-------|---|----|----|-----|-------|--------|-------|-------|--------|-------|----|-----|------|-------|------|
| Q91ZW3   | SWI/SNF-related matrix-associated actin-dependent regulator of chromatin subfamily A member 5 OS=Mus musculus GN=Smarca5 PE=1 SV=1 -                                                   | 18.46 | 1 | 15 | 22 | 51  | 0.727 | 0.791  | 0.753 | 0.910 | 115.05 | 18.46 | 34 | 51  | 1051 | 121.6 | 8.15 |
| Q6ZPF3-3 | Isoform 3 of T-lymphoma invasion and metastasis-inducing protein 2 OS=Mus musculus GN=Tiam2 - [TTAM2_MOUSE] Krueppel-like factor 16 OS=Mus musculus GN=Klf16 PE=2 SV=2 - [KLF16_MOUSE] | 26.01 | 5 | 10 | 12 | 38  | 0.765 | 1.751  | 1.914 | 0.910 | 100.75 | 26.01 | 19 | 38  | 619  | 70.1  | 6.33 |
| P58334   | Ran GTPase-activating protein 1 OS=Mus musculus GN=Rangap1 PE=1 SV=2 -                                                                                                                 | 41.60 | 1 | 21 | 21 | 70  | 0.656 | 1.165  | 0.776 | 0.910 | 201.01 | 41.60 | 36 | 70  | 589  | 63.5  | 4.68 |
| Q91VN6   | Probable ATP-dependent RNA helicase DDX41 OS=Mus musculus GN=Ddx41 PE=1 SV=2 - [DDX41_MOUSE]                                                                                           | 3.86  | 1 | 3  | 3  | 5   | 0.867 | 0.723  | 0.859 | 0.910 | 10.14  | 3.86  | 4  | 5   | 622  | 69.8  | 6.70 |
| P63330   | Serine/threonine-protein phosphatase 2A catalytic subunit alpha isoform OS=Mus musculus GN=Ppp2ca PE=1 SV=1 - [PP2AA_MOUSE]                                                            | 66.02 | 1 | 2  | 15 | 302 | 1.277 | 0.867  | 0.982 | 0.910 | 948.91 | 66.02 | 30 | 302 | 309  | 35.6  | 5.54 |
| Q5GH67   | XK-related protein 4 OS=Mus musculus GN=Xkr4 PE=1 SV=1 - [XKR4_MOUSE]                                                                                                                  | 12.83 | 1 | 7  | 7  | 30  | 0.556 | 1.156  | 1.058 | 0.910 | 91.37  | 12.83 | 12 | 30  | 647  | 71.5  | 8.03 |
| E9PZJ7   | Protein Vmn2r107 OS=Mus musculus GN=Vmn2r107 PE=2 SV=1 - [E9PZJ7_MOUSE]                                                                                                                | 0.70  | 1 | 1  | 1  | 1   | 0.958 | 0.790  | 0.871 | 0.910 | 1.86   | 0.70  | 1  | 1   | 861  | 99.2  | 7.24 |
| P39098-2 | Isoform 2 of Mannosyl-oligosaccharide 1,2-alpha-mannosidase IB OS=Mus musculus GN=Man1a2 - [MA1A2_MOUSE]                                                                               | 5.86  | 3 | 3  | 3  | 4   | 0.736 | 1.229  | 0.908 | 0.910 | 8.41   | 5.86  | 4  | 4   | 614  | 69.9  | 8.68 |
| Q9WVQ0   | Polyamine-modulated factor 1-binding protein 1 OS=Mus musculus GN=Pmf1 PE=2 SV=1 - [PMFB_MOUSE]                                                                                        | 3.52  | 3 | 2  | 3  | 3   | 1.172 | 1.059  | 1.021 | 0.910 | 5.81   | 3.52  | 3  | 3   | 1022 | 119.3 | 6.58 |
| Q9DC04-1 | Isoform 5 of Regulator of G-protein signaling 3 OS=Mus musculus GN=Rgs3 -                                                                                                              | 11.27 | 7 | 6  | 6  | 10  | 1.689 | 0.969  | 1.104 | 0.910 | 29.32  | 11.27 | 10 | 10  | 568  | 61.5  | 4.94 |
| Q9J111   | Serine/threonine-protein kinase 4 OS=Mus musculus GN=Sk4 PE=1 SV=1 - [STK4_MOUSE]                                                                                                      | 24.23 | 5 | 6  | 10 | 25  | 1.428 | 1.068  | 0.912 | 0.910 | 65.76  | 24.23 | 16 | 25  | 487  | 55.5  | 5.19 |
| G5E870   | E3 ubiquitin-protein ligase TRIP12 OS=Mus musculus GN=Trip12 PE=1 SV=1 - [TRIPC_MOUSE]                                                                                                 | 13.93 | 1 | 21 | 21 | 47  | 0.620 | 1.008  | 0.873 | 0.910 | 120.39 | 13.93 | 36 | 47  | 2025 | 224.0 | 8.35 |
| F6QXA3   | BTB/POZ domain-containing protein KCTD7 (Fragment) OS=Mus musculus GN=Kctd7 PE=2 SV=1 - [F6QXA3_MOUSE]                                                                                 | 15.09 | 2 | 2  | 2  | 3   | 1.618 | 0.822  | 0.886 | 0.910 | 12.09  | 15.09 | 3  | 3   | 232  | 25.6  | 7.17 |
| Q7TQK1   | Integrator complex subunit 7 OS=Mus musculus GN=Ints7 PE=1 SV=1 - [INT7_MOUSE]                                                                                                         | 5.07  | 1 | 4  | 4  | 7   | 0.811 | 1.016  | 1.017 | 0.911 | 15.57  | 5.07  | 6  | 7   | 966  | 106.8 | 8.22 |
| Q9CQU1   | Microfibrillar-associated protein 1 OS=Mus musculus GN=Mfap1 PE=1 SV=1 - [MFAP1_MOUSE]                                                                                                 | 13.21 | 1 | 5  | 5  | 8   | 1.546 | 0.834  | 1.146 | 0.911 | 18.67  | 13.21 | 6  | 8   | 439  | 51.9  | 4.98 |
| Q8VCK5   | Calcium uptake protein 1, mitochondrial OS=Mus musculus GN=Mic1 PE=1 SV=1 - [MICU1_MOUSE]                                                                                              | 26.83 | 4 | 10 | 11 | 31  | 0.700 | 1.007  | 1.139 | 0.911 | 94.49  | 26.83 | 18 | 31  | 477  | 54.3  | 8.59 |
| P98192   | Dihydroxyacetone phosphate acyltransferase OS=Mus musculus GN=Gnpat PE=2 SV=1 - [GNPAT_MOUSE]                                                                                          | 3.69  | 2 | 3  | 3  | 5   | 0.948 | 0.959  | 0.705 | 0.911 | 11.66  | 3.69  | 5  | 5   | 678  | 76.8  | 8.13 |
| Q920D3   | Mediator of RNA polymerase II transcription subunit 28 OS=Mus musculus GN=Med28 PE=2 SV=2 - [MEV28_MOUSE]                                                                              | 29.78 | 2 | 4  | 4  | 6   | 1.001 | 0.803  | 0.871 | 0.911 | 16.97  | 29.78 | 5  | 6   | 178  | 19.5  | 5.58 |
| O35627-2 | Isoform CAR2 of Nuclear receptor subfamily 1 group I member 3 OS=Mus musculus GN=Nr113 - [NR113_MOUSE]                                                                                 | 3.50  | 3 | 1  | 1  | 1   | 2.704 | 0.405  | 1.067 | 0.911 | 0.00   | 3.50  | 1  | 1   | 286  | 32.5  | 8.53 |
| P07310   | Creatine kinase M-type OS=Mus musculus GN=Ckm PE=1 SV=1 - [KCRM_MOUSE]                                                                                                                 | 44.88 | 1 | 13 | 16 | 123 | 7.322 | 12.065 | 0.657 | 0.911 | 348.69 | 44.88 | 30 | 123 | 381  | 43.0  | 7.06 |
| B9EKS2   | Jumonji domain containing 1B OS=Mus musculus GN=Kdm3b PE=2 SV=1 - [B9EKS2_MOUSE]                                                                                                       | 6.53  | 3 | 7  | 8  | 19  | 1.080 | 0.923  | 1.015 | 0.911 | 48.90  | 6.53  | 12 | 19  | 1762 | 191.3 | 7.23 |
| Q925H0   | Acid-sensing ion channel 2 OS=Mus musculus GN=Asic2 PE=1 SV=1 - [ASIC2_MOUSE]                                                                                                          | 7.42  | 1 | 1  | 4  | 6   | 0.838 | 1.062  | 0.870 | 0.911 | 18.90  | 7.42  | 6  | 6   | 512  | 57.7  | 5.19 |

|          |                                                                                                                                         |       |    |     |     |      |       |       |       |       |         |       |     |      |      |       |       |
|----------|-----------------------------------------------------------------------------------------------------------------------------------------|-------|----|-----|-----|------|-------|-------|-------|-------|---------|-------|-----|------|------|-------|-------|
| Q3UV20   | MAM domain-containing glycosylphosphatidylinositol anchor protein 2 OS=Mus musculus GN=Mdga2 PE=2 SV=1 - [Q3UV20_MOUSE]                 | 27.12 | 4  | 22  | 22  | 51   | 0.794 | 0.739 | 0.795 | 0.911 | 137.53  | 27.12 | 34  | 51   | 1025 | 114.9 | 7.93  |
| Q9CYK1   | Tryptophan-tRNA ligase, mitochondrial OS=Mus musculus GN=Wars2 PE=2 SV=2 - [SYWM_MOUSE]                                                 | 25.28 | 1  | 10  | 10  | 34   | 0.689 | 1.417 | 0.928 | 0.911 | 99.78   | 25.28 | 18  | 34   | 360  | 40.1  | 8.82  |
| Q02257   | Junction plakoglobin OS=Mus musculus GN=Jup PE=1 SV=3 - [PLAK_MOUSE]                                                                    | 36.64 | 1  | 17  | 22  | 60   | 0.881 | 0.915 | 0.973 | 0.911 | 200.09  | 36.64 | 36  | 60   | 745  | 81.7  | 6.14  |
| P14873   | Microtubule-associated protein 1B OS=Mus musculus GN=Map1b PE=1 SV=2 -                                                                  | 49.19 | 1  | 108 | 110 | 1242 | 1.643 | 0.860 | 1.263 | 0.911 | 3516.47 | 49.19 | 191 | 1242 | 2464 | 270.1 | 4.83  |
| Q8BJ71   | Nuclear pore complex protein Nup93 OS=Mus musculus GN=Nup93 PE=2 SV=1 - [NUP93_MOUSE]                                                   | 28.57 | 2  | 24  | 24  | 81   | 0.872 | 1.072 | 0.908 | 0.911 | 217.76  | 28.57 | 41  | 81   | 819  | 93.2  | 5.72  |
| Q9ESB3   | Histidine-rich glycoprotein OS=Mus musculus GN=Hrg PE=1 SV=2 - [HRG_MOUSE]                                                              | 14.29 | 1  | 7   | 7   | 25   | 3.501 | 2.827 | 0.508 | 0.911 | 69.98   | 14.29 | 13  | 25   | 525  | 59.1  | 7.66  |
| Q8R317   | Ubiquitin-1 OS=Mus musculus GN=Ubqln1 PE=1 SV=1 - [UBQL1_MOUSE]                                                                         | 34.02 | 2  | 9   | 13  | 161  | 1.655 | 1.015 | 0.855 | 0.911 | 485.56  | 34.02 | 22  | 161  | 582  | 61.9  | 4.94  |
| Q8JZM7   | Parafibromin OS=Mus musculus GN=Cdc73 PE=2 SV=1 - [CDC73_MOUSE]                                                                         | 12.05 | 1  | 4   | 5   | 16   | 1.054 | 0.971 | 1.010 | 0.911 | 43.22   | 12.05 | 8   | 16   | 531  | 60.5  | 9.61  |
| G5E8Q0   | Lysosomal trafficking regulator, isoform CRA_a OS=Mus musculus GN=Lyst PE=4 SV=1 - [G5E8Q0_MOUSE]                                       | 3.56  | 3  | 9   | 10  | 26   | 0.757 | 1.144 | 1.060 | 0.911 | 61.02   | 3.56  | 15  | 26   | 3787 | 425.1 | 6.60  |
| Q6NV83-3 | Isoform 3 of U2 snRNP-associated SURP motif-containing protein OS=Mus musculus GN=U2surp (chr10) MOUSE]                                 | 19.49 | 3  | 15  | 15  | 35   | 0.631 | 0.870 | 0.919 | 0.912 | 93.52   | 19.49 | 23  | 35   | 985  | 113.2 | 8.35  |
| P46662   | Merlin OS=Mus musculus GN=Nf2 PE=1 SV=2 - [MFR1_MOUSE]                                                                                  | 18.46 | 6  | 9   | 10  | 19   | 1.083 | 0.758 | 1.071 | 0.912 | 36.43   | 18.46 | 13  | 19   | 596  | 69.7  | 6.35  |
| E0CYV9   | Protein 1110002E22Rik OS=Mus musculus GN=1110002E22Rik PE=4 SV=1 - [E0CYV9_MOUSE]                                                       | 0.67  | 1  | 1   | 1   | 1    | 1.408 | 0.772 | 0.869 | 0.912 | 2.06    | 0.67  | 1   | 1    | 1786 | 189.6 | 8.57  |
| Q925I8   | OL-protocadherin isoform OS=Mus musculus GN=Podn10 PE=2 SV=1 - [Q925I8_MOUSE]                                                           | 25.58 | 4  | 17  | 17  | 65   | 1.238 | 0.956 | 1.056 | 0.912 | 170.50  | 25.58 | 29  | 65   | 1040 | 113.1 | 4.92  |
| Q61072   | Disintegrin and metalloproteinase domain-containing protein 9 OS=Mus musculus GN=Adam9 PE=1 SV=2 - [ADAM9_MOUSE]                        | 5.68  | 2  | 4   | 4   | 9    | 0.662 | 0.786 | 0.919 | 0.912 | 24.43   | 5.68  | 5   | 9    | 845  | 92.0  | 7.47  |
| Q91W18-2 | Isoform 2 of Tudor domain-containing protein 3 OS=Mus musculus GN=Tdrd3 - [TDRD3_MOUSE]                                                 | 21.79 | 5  | 14  | 14  | 29   | 1.489 | 0.790 | 1.178 | 0.912 | 85.69   | 21.79 | 22  | 29   | 716  | 79.0  | 9.13  |
| E9Q945   | Protein Kctd18 OS=Mus musculus GN=Kctd18 PE=2 SV=1 - [E9Q945_MOUSE]                                                                     | 12.98 | 3  | 3   | 3   | 5    | 0.958 | 0.873 | 0.871 | 0.912 | 13.92   | 12.98 | 5   | 5    | 262  | 28.1  | 9.55  |
| Q6DFZ2   | Nesprin-2 (Fragment) OS=Mus musculus GN=Synp2 PE=2 SV=1 - [Q6DFZ2_MOUSE]                                                                | 4.28  | 2  | 1   | 11  | 19   | 0.493 | 1.121 | 0.962 | 0.912 | 38.27   | 4.28  | 15  | 19   | 2152 | 247.7 | 5.34  |
| Q9CQW0   | ER membrane protein complex subunit 6 OS=Mus musculus GN=Emc6 PE=2 SV=1 - [EMC6_MOUSE]                                                  | 20.00 | 1  | 2   | 2   | 6    | 0.736 | 0.724 | 0.763 | 0.912 | 15.52   | 20.00 | 4   | 6    | 110  | 12.0  | 10.07 |
| Q8BR10   | Interleukin-1 receptor-associated kinase 1 OS=Mus musculus GN=Irak1 PE=2 SV=1 - [Q8BR10_MOUSE]                                          | 7.45  | 11 | 3   | 3   | 7    | 0.656 | 1.006 | 0.908 | 0.912 | 16.01   | 7.45  | 5   | 7    | 711  | 77.3  | 6.27  |
| Q3U5F4   | YrdC domain-containing protein, mitochondrial OS=Mus musculus GN=Yrdc PE=1 SV=1 - [YRDC_MOUSE]                                          | 21.43 | 2  | 3   | 3   | 5    | 2.017 | 1.106 | 1.111 | 0.912 | 9.10    | 21.43 | 4   | 5    | 280  | 29.4  | 6.07  |
| Q62377   | U2 small nuclear ribonucleoprotein auxiliary factor 35 kDa subunit-related protein 2 OS=Mus musculus GN=Zrsr2 PE=2 SV=1 - [U2AFM_MOUSE] | 4.55  | 4  | 2   | 2   | 2    | 0.975 | 0.922 | 1.105 | 0.912 | 6.75    | 4.55  | 2   | 2    | 462  | 55.3  | 8.43  |
| Q91WU0   | Expressed sequence AU018778 OS=Mus musculus GN=Ces1f PE=2 SV=1 - [Q91WU0_MOUSE]                                                         | 5.88  | 1  | 2   | 3   | 5    | 1.776 | 1.018 | 0.961 | 0.912 | 8.47    | 5.88  | 3   | 5    | 561  | 61.6  | 6.48  |
| Q5U452   | MCG14616 OS=Mus musculus GN=2810408M09Rik PE=2 SV=1 - [Q5U452_MOUSE]                                                                    | 13.52 | 4  | 3   | 3   | 5    | 0.557 | 0.537 | 0.763 | 0.912 | 12.06   | 13.52 | 4   | 5    | 244  | 27.4  | 9.07  |
| Q8CCJ3   | E3 UFM1-protein ligase 1 OS=Mus musculus GN=Ufl1 PE=1 SV=2 - [UFL1_MOUSE]                                                               | 25.22 | 3  | 18  | 18  | 53   | 0.713 | 0.780 | 0.770 | 0.912 | 169.40  | 25.22 | 33  | 53   | 793  | 89.5  | 6.67  |



|          |                                                                                                                      |       |    |    |    |     |       |       |       |       |        |       |    |     |      |       |       |
|----------|----------------------------------------------------------------------------------------------------------------------|-------|----|----|----|-----|-------|-------|-------|-------|--------|-------|----|-----|------|-------|-------|
| Q07279   | Transcription factor NF-E2 45 kDa subunit OS=Mus musculus GN=Nfe2 PE=1 SV=1 - [NFE2_MOUSE]                           | 2.95  | 2  | 1  | 1  | 1   | 8.229 | 1.484 | 1.402 | 0.912 | 2.40   | 2.95  | 1  | 1   | 373  | 41.5  | 4.94  |
| P63054   | Purkinje cell protein 4 OS=Mus musculus GN=Pcp4 PE=2 SV=2 - [PCP4_MOUSE]                                             | 62.90 | 2  | 4  | 4  | 74  | 1.292 | 0.720 | 2.123 | 0.912 | 217.47 | 62.90 | 7  | 74  | 62   | 6.8   | 6.71  |
| Q9D2U9   | Histone H2B type 3-A OS=Mus musculus GN=Hist3h2ba PE=1 SV=3 - [H2B3A_MOUSE]                                          | 77.78 | 2  | 3  | 14 | 216 | 0.637 | 0.655 | 0.773 | 0.912 | 633.42 | 77.78 | 25 | 216 | 126  | 14.0  | 10.37 |
| Q60989   | E3 ubiquitin-protein ligase XIAP OS=Mus musculus GN=Xiap PE=1 SV=2 - [XIAP_MOUSE]                                    | 12.30 | 2  | 4  | 4  | 10  | 1.758 | 0.962 | 0.959 | 0.912 | 35.32  | 12.30 | 8  | 10  | 496  | 56.0  | 6.23  |
| P08775   | DNA-directed RNA polymerase II subunit RPB1 OS=Mus musculus GN=Polr2a PE=1 SV=3 - [RPB1_MOUSE]                       | 14.47 | 1  | 23 | 24 | 47  | 0.693 | 0.845 | 0.996 | 0.912 | 121.78 | 14.47 | 35 | 47  | 1970 | 217.0 | 7.37  |
| P51410   | 60S ribosomal protein L9 OS=Mus musculus GN=Rpl9 PE=2 SV=2 - [RL9_MOUSE]                                             | 53.65 | 4  | 10 | 10 | 36  | 0.529 | 0.688 | 0.792 | 0.913 | 102.55 | 53.65 | 17 | 36  | 192  | 21.9  | 9.95  |
| Q3U3T8-2 | Isoform 2 of WD repeat-containing protein 62 OS=Mus musculus GN=Wdr62 -                                              | 1.12  | 5  | 1  | 1  | 1   | 0.955 | 1.039 | 0.953 | 0.913 | 2.97   | 1.12  | 1  | 1   | 1075 | 119.1 | 5.71  |
| P70407   | Cadherin-9 OS=Mus musculus GN=Cdh9 PE=2 SV=2 - [CADH9_MOUSE]                                                         | 9.92  | 2  | 5  | 8  | 15  | 1.038 | 1.516 | 1.011 | 0.913 | 44.12  | 9.92  | 11 | 15  | 786  | 88.2  | 4.96  |
| Q9D666-3 | Isoform 3 of SUN domain-containing protein 1 OS=Mus musculus GN=Sun1 - [SUN1_MOUSE]                                  | 13.70 | 10 | 2  | 9  | 23  | 0.569 | 0.986 | 0.944 | 0.913 | 63.96  | 13.70 | 15 | 23  | 876  | 97.9  | 6.64  |
| Q9Z2U0   | Proteasome subunit alpha type-7 OS=Mus musculus GN=Psm7 PE=1 SV=1 - [PSA7_MOUSE]                                     | 58.47 | 2  | 13 | 13 | 80  | 1.840 | 1.023 | 0.832 | 0.913 | 214.27 | 58.47 | 24 | 80  | 248  | 27.8  | 8.46  |
| Q6DFV5   | Probable helicase with zinc finger domain OS=Mus musculus GN=Helz PE=1 SV=2 - [HELZ_MOUSE]                           | 2.04  | 5  | 3  | 3  | 7   | 1.340 | 1.140 | 1.395 | 0.913 | 25.52  | 2.04  | 5  | 7   | 1964 | 219.7 | 7.40  |
| G3X939   | Sodium/hydrogen exchanger OS=Mus musculus GN=Slc9a3 PE=3 SV=1 -                                                      | 3.98  | 1  | 2  | 2  | 3   | 0.654 | 0.950 | 1.001 | 0.913 | 0.00   | 3.98  | 2  | 3   | 829  | 93.0  | 7.71  |
| E0CZ78   | Serine/threonine-protein phosphatase OS=Mus musculus GN=Ppp3cb PE=2 SV=1 - [E0CZ78_MOUSE]                            | 37.60 | 5  | 9  | 16 | 182 | 0.758 | 1.639 | 1.147 | 0.913 | 477.20 | 37.60 | 29 | 182 | 524  | 59.0  | 5.91  |
| B1AUH1-2 | Isoform 2 of Receptor-type tyrosine-protein phosphatase U OS=Mus musculus GN=Ptpu - [PTPRU_MOUSE]                    | 7.17  | 3  | 7  | 8  | 15  | 1.160 | 1.353 | 0.823 | 0.913 | 42.83  | 7.17  | 13 | 15  | 1436 | 161.1 | 6.81  |
| Q91WX5   | Bak1 protein OS=Mus musculus GN=Bak1 PE=2 SV=1 - [Q91WX5_MOUSE]                                                      | 16.56 | 4  | 2  | 2  | 5   | 0.999 | 0.773 | 0.636 | 0.913 | 16.26  | 16.56 | 3  | 5   | 151  | 16.4  | 4.46  |
| P97318-8 | Isoform DAB553 of Disabled homolog 1 OS=Mus musculus GN=Dab1 -                                                       | 9.76  | 9  | 4  | 4  | 14  | 1.068 | 1.036 | 1.183 | 0.913 | 46.95  | 9.76  | 7  | 14  | 553  | 59.4  | 5.36  |
| P04925   | Major prion protein OS=Mus musculus GN=Prnp PE=1 SV=2 - [PRIO_MOUSE]                                                 | 28.74 | 1  | 4  | 4  | 42  | 0.850 | 0.840 | 1.027 | 0.913 | 115.18 | 28.74 | 6  | 42  | 254  | 28.0  | 9.33  |
| H9KUX8   | Baculoviral IAP repeat-containing protein 6 OS=Mus musculus GN=Birc6 PE=2 SV=1 - [H9KUX8_MOUSE]                      | 13.62 | 6  | 48 | 49 | 107 | 0.875 | 0.811 | 0.885 | 0.913 | 288.57 | 13.62 | 76 | 107 | 4854 | 529.1 | 6.06  |
| F8VPR5   | CREB-binding protein OS=Mus musculus GN=Crebbp PE=2 SV=1 - [F8VPR5_MOUSE]                                            | 7.54  | 2  | 8  | 12 | 42  | 0.875 | 0.911 | 0.918 | 0.913 | 74.64  | 7.54  | 19 | 42  | 2441 | 265.4 | 8.50  |
| E9Q1Z2   | Protein Enthd1 OS=Mus musculus GN=Enthd1 PE=4 SV=1 - [E9Q1Z2_MOUSE]                                                  | 2.91  | 1  | 1  | 2  | 5   | 0.405 | 0.801 | 0.666 | 0.913 | 10.68  | 2.91  | 3  | 5   | 618  | 68.4  | 6.84  |
| Q9CX56   | 26S proteasome non-ATPase regulatory subunit 8 OS=Mus musculus GN=Psm8 PE=1 SV=2 - [PSMD8_MOUSE]                     | 41.93 | 1  | 15 | 15 | 76  | 0.684 | 1.105 | 0.812 | 0.913 | 164.53 | 41.93 | 29 | 76  | 353  | 39.9  | 9.58  |
| P14685   | 26S proteasome non-ATPase regulatory subunit 3 OS=Mus musculus GN=Psm3 PE=1 SV=3 - [PSMD3_MOUSE]                     | 51.70 | 2  | 26 | 26 | 130 | 0.732 | 0.907 | 0.839 | 0.913 | 329.15 | 51.70 | 45 | 130 | 530  | 60.7  | 8.44  |
| F6YIW9   | Leucine-rich repeat serine/threonine-protein kinase 1 (Fragment) OS=Mus musculus GN=Lrrk1 PE=2 SV=1 - [F6YIW9_MOUSE] | 9.06  | 2  | 3  | 3  | 3   | 0.429 | 1.028 | 1.275 | 0.913 | 6.93   | 9.06  | 3  | 3   | 508  | 57.6  | 6.25  |
| E9Q6C6   | Tubulin polyglutamylase TTL7 (Fragment) OS=Mus musculus GN=Tll7 PE=2 SV=1 - [E9Q6C6_MOUSE]                           | 5.41  | 4  | 3  | 4  | 12  | 0.815 | 0.626 | 0.997 | 0.913 | 25.54  | 5.41  | 6  | 12  | 887  | 102.6 | 9.23  |

|          |                                                                                                                                                       |       |   |    |    |     |       |       |       |       |        |       |    |     |      |       |       |
|----------|-------------------------------------------------------------------------------------------------------------------------------------------------------|-------|---|----|----|-----|-------|-------|-------|-------|--------|-------|----|-----|------|-------|-------|
| P97379-2 | Isoform B of Ras GTPase-activating protein-binding protein 2 OS=Mus musculus GN=G3bp2 - [G3BP2_MOUSE]                                                 | 38.31 | 1 | 1  | 15 | 184 | 2.266 | 1.047 | 0.884 | 0.913 | 466.83 | 38.31 | 27 | 184 | 449  | 50.8  | 5.43  |
| D3Z0K6   | MCG120108, isoform CRA_a OS=Mus musculus GN=Rsb1l1 PE=4 SV=1 - [D3Z0K6_MOUSE]                                                                         | 2.92  | 1 | 1  | 1  | 1   | 0.995 | 1.112 | 0.768 | 0.913 | 2.08   | 2.92  | 1  | 1   | 821  | 91.7  | 8.95  |
| E9Q7G4   | BAH and coiled-coil domain-containing protein 1 OS=Mus musculus GN=Bahcc1 PE=2 SV=1 - [E9Q7G4_MOUSE]                                                  | 2.38  | 2 | 4  | 4  | 4   | 2.071 | 1.083 | 0.971 | 0.913 | 10.52  | 2.38  | 4  | 4   | 2643 | 282.4 | 9.03  |
| Q3UUJ3   | Acyl-coenzyme A thioesterase THEM4 OS=Mus musculus GN=Them4 PE=1 SV=1 - [THEM4_MOUSE]                                                                 | 32.61 | 2 | 7  | 7  | 15  | 0.455 | 0.972 | 1.006 | 0.914 | 39.44  | 32.61 | 10 | 15  | 230  | 26.0  | 9.64  |
| E0CX32   | Coiled-coil domain-containing protein 85A OS=Mus musculus GN=Ccdc85a PE=2 SV=1 - [E0CX32_MOUSE]                                                       | 21.65 | 4 | 8  | 11 | 41  | 0.729 | 0.907 | 1.001 | 0.914 | 115.65 | 21.65 | 21 | 41  | 545  | 59.6  | 8.68  |
| Q9CZT6   | Protein CMS1 OS=Mus musculus GN=Cms1 PE=2 SV=1 - [CMS1_MOUSE]                                                                                         | 8.70  | 1 | 2  | 2  | 3   | 1.083 | 1.045 | 0.984 | 0.914 | 5.03   | 8.70  | 3  | 3   | 276  | 31.6  | 8.46  |
| Q6DID3   | Protein SCAF8 OS=Mus musculus GN=Scaf8 PE=1 SV=1 - [SCAF8_MOUSE]                                                                                      | 4.97  | 1 | 5  | 6  | 11  | 0.958 | 1.085 | 0.990 | 0.914 | 27.45  | 4.97  | 8  | 11  | 1268 | 139.5 | 8.24  |
| P62849-2 | Isoform 2 of 40S ribosomal protein S24 OS=Mus musculus GN=Rps24 - [RPS24_MOUSE]                                                                       | 40.00 | 3 | 6  | 6  | 25  | 0.688 | 0.920 | 0.831 | 0.914 | 68.42  | 40.00 | 11 | 25  | 130  | 15.1  | 10.89 |
| Q8COL9   | Glycerophosphocholine phosphodiesterase GPCPD1 OS=Mus musculus GN=Gpcpd1 PE=1 SV=1 - [GPCPD1_MOUSE]                                                   | 20.59 | 9 | 11 | 11 | 29  | 0.859 | 0.730 | 1.084 | 0.914 | 72.32  | 20.59 | 17 | 29  | 675  | 76.5  | 5.58  |
| G3X9D3   | Podocalyxin-like 2 OS=Mus musculus GN=Podxl2 PE=4 SV=1 - [G3X9D3_MOUSE]                                                                               | 7.98  | 3 | 3  | 3  | 6   | 0.854 | 0.921 | 0.805 | 0.914 | 18.68  | 7.98  | 6  | 6   | 539  | 58.4  | 4.39  |
| Q9CQE5   | Regulator of G-protein signaling 10 OS=Mus musculus GN=Rgs10 PE=2 SV=1 - [RGS10_MOUSE]                                                                | 49.72 | 1 | 6  | 7  | 24  | 1.420 | 0.913 | 1.082 | 0.914 | 78.30  | 49.72 | 11 | 24  | 181  | 21.1  | 6.81  |
| Q80YR9   | RNA-binding protein 12B-A OS=Mus musculus GN=Rbm12b1 PE=1 SV=2 - [R12BA_MOUSE]                                                                        | 7.54  | 1 | 2  | 6  | 8   | 0.868 | 0.815 | 0.916 | 0.914 | 10.14  | 7.54  | 7  | 8   | 836  | 96.5  | 8.07  |
| Q8K2C9   | Very-long-chain (3R)-3-hydroxyacyl-[acyl-carrier protein] dehydratase 3 OS=Mus musculus GN=ptglp1 PE=1 SV=2 - [R12BA_MOUSE]                           | 20.72 | 1 | 7  | 7  | 32  | 0.655 | 0.849 | 0.736 | 0.914 | 97.15  | 20.72 | 11 | 32  | 362  | 43.1  | 9.13  |
| Q3TEL6-2 | Isoform 2 of RING finger protein 157 OS=Mus musculus GN=Rnf157 - [RN157_MOUSE]                                                                        | 17.62 | 5 | 5  | 7  | 20  | 1.344 | 0.968 | 1.262 | 0.914 | 55.37  | 17.62 | 11 | 20  | 681  | 74.5  | 4.75  |
| Q03141-3 | Isoform 3 of MAP/microtubule affinity-regulating kinase 3 OS=Mus musculus GN=Mark3 - [MARK3_MOUSE]                                                    | 39.38 | 3 | 16 | 29 | 127 | 0.796 | 0.851 | 1.092 | 0.914 | 398.22 | 39.38 | 49 | 127 | 744  | 83.2  | 9.42  |
| Q7TSK2-2 | Isoform 2 of Seizure protein 6 OS=Mus musculus GN=Sez6 - [SEZ6_MOUSE]                                                                                 | 7.06  | 3 | 1  | 5  | 9   | 1.223 | 1.876 | 2.170 | 0.914 | 26.82  | 7.06  | 8  | 9   | 977  | 106.0 | 5.36  |
| F6Q475   | Protein Ftsj1 (Fragment) OS=Mus musculus GN=Ftsj1 PE=4 SV=1 - [F6Q475_MOUSE]                                                                          | 16.22 | 3 | 1  | 1  | 4   | 0.618 | 0.833 | 0.796 | 0.914 | 13.40  | 16.22 | 2  | 4   | 111  | 12.4  | 4.87  |
| Q6GQU6   | Leucine-rich repeat and immunoglobulin-like domain-containing nogo receptor-interacting protein 3 OS=Mus musculus GN=Lingo3 PE=2 SV=2 - [LIGO3_MOUSE] | 7.98  | 1 | 4  | 4  | 13  | 0.923 | 0.924 | 0.959 | 0.914 | 32.27  | 7.98  | 8  | 13  | 589  | 64.6  | 8.31  |
| Q9DBX2   | Phosducin-like protein OS=Mus musculus GN=Pdc PE=1 SV=1 - [PHLP_MOUSE]                                                                                | 26.91 | 2 | 7  | 7  | 31  | 1.383 | 1.067 | 1.158 | 0.914 | 84.69  | 26.91 | 12 | 31  | 301  | 34.4  | 4.87  |
| Q8C761   | WD repeat-containing protein 60 OS=Mus musculus GN=Wdr60 PE=2 SV=1 - [WDR60_MOUSE]                                                                    | 3.00  | 1 | 3  | 3  | 4   | 2.150 | 0.964 | 0.785 | 0.914 | 4.60   | 3.00  | 4  | 4   | 999  | 115.3 | 7.24  |
| Q8BFU3   | RING finger protein 214 OS=Mus musculus GN=Rnf214 PE=2 SV=1 - [RN214_MOUSE]                                                                           | 38.32 | 6 | 6  | 23 | 99  | 1.273 | 0.783 | 1.106 | 0.914 | 301.68 | 38.32 | 40 | 99  | 668  | 73.6  | 6.23  |
| Q9JHU2   | Palmdelphin OS=Mus musculus GN=Palmd PE=1 SV=1 - [PALMD_MOUSE]                                                                                        | 30.49 | 3 | 14 | 14 | 43  | 1.813 | 1.934 | 1.429 | 0.914 | 132.76 | 30.49 | 22 | 43  | 551  | 62.7  | 5.66  |
| Q8CFP6   | DnaJ homolog subfamily C member 27 OS=Mus musculus GN=Dnajc27 PE=2 SV=1 - [DNAJC27_MOUSE]                                                             | 11.72 | 1 | 3  | 3  | 8   | 0.655 | 0.630 | 0.860 | 0.914 | 24.88  | 11.72 | 6  | 8   | 273  | 30.8  | 8.47  |
| Q5SR7-4  | Isoform 4 of F-box/WD repeat-containing protein 11 OS=Mus musculus GN=Fbxw11 - [FBW11_MOUSE]                                                          | 17.72 | 4 | 4  | 6  | 13  | 1.664 | 0.874 | 1.043 | 0.914 | 46.72  | 17.72 | 11 | 13  | 508  | 58.4  | 7.02  |

|          |                                                                                                                                         |       |   |    |    |      |       |       |       |       |         |       |    |      |      |       |       |
|----------|-----------------------------------------------------------------------------------------------------------------------------------------|-------|---|----|----|------|-------|-------|-------|-------|---------|-------|----|------|------|-------|-------|
| Q8CGN5-4 | Isoform 4 of Perilipin-1<br>OS=Mus musculus<br>GN=Plin1 -<br>[PLIN1_MOUSE]                                                              | 2.46  | 4 | 1  | 1  | 1    | 0.796 | 0.658 | 0.857 | 0.914 | 1.93    | 2.46  | 1  | 1    | 244  | 25.9  | 6.34  |
| Q8B5E0   | Regulator of microtubule<br>dynamics protein 2<br>OS=Mus musculus<br>GN=Rmdn2 PE=2 SV=1 -<br>[RMD2_MOUSE]                               | 6.34  | 1 | 2  | 3  | 5    | 1.062 | 1.295 | 0.862 | 0.914 | 18.25   | 6.34  | 4  | 5    | 410  | 47.0  | 7.56  |
| O88307   | Sortilin-related receptor<br>OS=Mus musculus<br>GN=Sort1 PE=2 SV=3 -<br>[SORL_MOUSE]                                                    | 8.31  | 1 | 17 | 17 | 39   | 1.187 | 0.897 | 0.926 | 0.915 | 110.03  | 8.31  | 28 | 39   | 2215 | 246.9 | 5.54  |
| O35704   | Serine palmitoyltransferase<br>1 OS=Mus musculus<br>GN=Spttc1 PE=2 SV=2 -<br>[SPTC1_MOUSE]                                              | 10.36 | 1 | 4  | 4  | 6    | 1.262 | 1.096 | 0.759 | 0.915 | 17.60   | 10.36 | 6  | 6    | 473  | 52.5  | 6.40  |
| Q8R1F6-2 | Isoform 2 of Protein HID1<br>OS=Mus musculus<br>GN=Hid1 - [HID1_MOUSE]                                                                  | 16.52 | 3 | 13 | 13 | 38   | 0.565 | 0.850 | 0.798 | 0.915 | 96.75   | 16.52 | 17 | 38   | 787  | 88.6  | 5.94  |
| Q9QY14   | DnaJ homolog subfamily B<br>member 12 OS=Mus<br>musculus GN=Dnajb12<br>PE=2 SV=2 -                                                      | 16.49 | 3 | 6  | 6  | 18   | 0.847 | 0.946 | 0.980 | 0.915 | 63.98   | 16.49 | 11 | 18   | 376  | 42.0  | 8.51  |
| F8WHY8   | Metastasis-associated<br>protein MTA1 OS=Mus<br>musculus GN=Mta1 PE=2<br>SV=1 - [F8WHY8_MOUSE]                                          | 27.79 | 3 | 12 | 16 | 62   | 0.708 | 0.804 | 0.886 | 0.915 | 150.51  | 27.79 | 25 | 62   | 698  | 79.1  | 9.42  |
| Q9WV98   | Mitochondrial import inner<br>membrane translocase<br>subunit Tim9 OS=Mus<br>musculus GN=Timm9<br>PE=1 SV=1 -<br>[TIM9_MOUSE]           | 65.17 | 1 | 5  | 5  | 52   | 1.540 | 1.078 | 1.025 | 0.915 | 133.91  | 65.17 | 10 | 52   | 89   | 10.3  | 7.21  |
| Q8R010   | Aminoacyl tRNA synthase<br>complex-interacting<br>multifunctional protein 2<br>OS=Mus musculus<br>GN=Aimp2 PE=1 SV=2 -<br>[AIMP2_MOUSE] | 58.75 | 2 | 11 | 11 | 38   | 0.766 | 0.942 | 0.844 | 0.915 | 119.63  | 58.75 | 20 | 38   | 320  | 35.4  | 7.83  |
| Q3TQP0   | Protein Gm10767 OS=Mus<br>musculus GN=Gm10767<br>PE=4 SV=1 -<br>[Q3TQP0_MOUSE]                                                          | 30.10 | 2 | 3  | 3  | 9    | 1.649 | 0.964 | 1.064 | 0.915 | 32.96   | 30.10 | 5  | 9    | 103  | 12.5  | 7.25  |
| Q99J14   | 26S proteasome non-<br>ATPase regulatory subunit<br>6 OS=Mus musculus<br>GN=Psmc6 PE=1 SV=1 -<br>[PSMD6_MOUSE]                          | 38.05 | 1 | 13 | 13 | 64   | 0.900 | 0.970 | 0.847 | 0.915 | 196.19  | 38.05 | 25 | 64   | 389  | 45.5  | 5.52  |
| E9Q153   | Protein transport protein<br>Sec23A OS=Mus musculus<br>GN=Sec23a PE=2 SV=1 -<br>[E9Q153_MOUSE]                                          | 30.84 | 2 | 16 | 20 | 136  | 0.690 | 0.909 | 0.847 | 0.915 | 426.89  | 30.84 | 38 | 136  | 736  | 82.9  | 7.46  |
| Q8VE22   | 28S ribosomal protein S23,<br>mitochondrial OS=Mus<br>musculus GN=Mips23<br>PE=2 SV=1 -<br>[RT23_MOUSE]                                 | 40.68 | 5 | 7  | 7  | 14   | 0.638 | 0.704 | 0.977 | 0.915 | 40.74   | 40.68 | 12 | 14   | 177  | 20.3  | 8.59  |
| Q61301-2 | Isoform 2 of Catenin alpha-<br>2 OS=Mus musculus<br>GN=Ctnna2 -<br>[CTNA2_MOUSE]                                                        | 59.12 | 8 | 35 | 48 | 236  | 0.592 | 0.930 | 0.946 | 0.915 | 673.36  | 59.12 | 86 | 236  | 905  | 100.4 | 5.96  |
| P84104-2 | Isoform Short of<br>Serine/arginine-rich<br>splicing factor 3 OS=Mus<br>musculus GN=Srsf3 -<br>[SRSF3_MOUSE]                            | 45.16 | 3 | 5  | 6  | 38   | 0.548 | 0.879 | 0.921 | 0.915 | 84.08   | 45.16 | 11 | 38   | 124  | 14.2  | 10.08 |
| E9Q3V9   | Latrophilin-1 OS=Mus<br>musculus GN=Lphn1 PE=2<br>SV=1 - [E9Q3V9_MOUSE]                                                                 | 33.05 | 7 | 31 | 33 | 203  | 0.928 | 1.088 | 1.008 | 0.915 | 636.01  | 33.05 | 58 | 203  | 1516 | 166.9 | 6.70  |
| Q3TAS6-2 | Isoform 2 of ER membrane<br>protein complex subunit<br>10 OS=Mus musculus<br>GN=Emc10 -<br>[EMC10_MOUSE]                                | 13.78 | 3 | 3  | 3  | 11   | 1.030 | 0.825 | 0.780 | 0.915 | 38.55   | 13.78 | 6  | 11   | 254  | 26.7  | 6.13  |
| Q6IR34-3 | Isoform 3 of G-protein-<br>signaling modulator 1<br>OS=Mus musculus<br>GN=Gpsm1 -                                                       | 51.54 | 9 | 22 | 25 | 78   | 0.975 | 0.866 | 1.124 | 0.915 | 243.38  | 51.54 | 43 | 78   | 650  | 71.9  | 6.15  |
| Q8R4C2   | RUN and FYVE domain-<br>containing protein 2<br>OS=Mus musculus<br>GN=Rufy2 PE=1 SV=2 -<br>[RUFY2_MOUSE]                                | 28.88 | 3 | 4  | 17 | 53   | 1.508 | 1.152 | 0.863 | 0.915 | 150.24  | 28.88 | 30 | 53   | 606  | 70.0  | 5.83  |
| P12023-2 | Isoform APP695 of<br>Amyloid beta A4 protein<br>OS=Mus musculus<br>GN=App - [A4_MOUSE]                                                  | 34.96 | 1 | 1  | 21 | 144  | 0.984 | 0.789 | 1.143 | 0.915 | 455.90  | 34.96 | 40 | 144  | 695  | 78.4  | 4.83  |
| Q8BFZ9   | Erln-2 OS=Mus musculus<br>GN=Erln2 PE=1 SV=1 -<br>[ERLN2_MOUSE]                                                                         | 50.88 | 2 | 14 | 17 | 78   | 0.757 | 1.249 | 0.832 | 0.916 | 234.81  | 50.88 | 29 | 78   | 340  | 37.8  | 5.50  |
| P63101   | 14-3-3 protein zeta/delta<br>OS=Mus musculus<br>GN=Ywhaz PE=1 SV=1 -<br>[1433Z_MOUSE]                                                   | 84.90 | 4 | 16 | 26 | 1458 | 1.140 | 1.427 | 1.075 | 0.916 | 3906.44 | 84.90 | 48 | 1458 | 245  | 27.8  | 4.79  |
| Q91VR5   | ATP-dependent RNA<br>helicase DDX1 OS=Mus<br>musculus GN=Ddx1 PE=1<br>SV=1 - [DDX1_MOUSE]                                               | 57.43 | 1 | 37 | 37 | 163  | 0.925 | 0.848 | 0.893 | 0.916 | 484.34  | 57.43 | 68 | 163  | 740  | 82.4  | 7.21  |
| Q6PGL7   | WASH complex subunit<br>FAM21 OS=Mus musculus<br>GN=Fam21 PE=1 SV=1 -<br>[FAM21_MOUSE]                                                  | 43.78 | 2 | 38 | 38 | 152  | 1.370 | 0.870 | 1.138 | 0.916 | 497.40  | 43.78 | 61 | 152  | 1334 | 145.2 | 4.77  |
| Q8CC96   | Uncharacterized protein<br>C6orf222 homolog<br>OS=Mus musculus PE=2<br>SV=1 - [CF222_MOUSE]                                             | 1.49  | 1 | 1  | 1  | 1    | 1.543 | 1.073 | 1.466 | 0.916 | 2.01    | 1.49  | 1  | 1    | 669  | 72.9  | 9.01  |

|          |                                                                                                                                                        |       |   |    |    |     |       |       |       |       |         |       |    |     |      |       |      |
|----------|--------------------------------------------------------------------------------------------------------------------------------------------------------|-------|---|----|----|-----|-------|-------|-------|-------|---------|-------|----|-----|------|-------|------|
| Q07409   | Contactin-3 OS=Mus musculus GN=Cntr3 PE=2 SV=2 - [CNTN3_MOUSE]                                                                                         | 16.54 | 1 | 12 | 14 | 28  | 1.035 | 1.122 | 0.895 | 0.916 | 74.91   | 16.54 | 22 | 28  | 1028 | 113.2 | 6.23 |
| Q9D3L0   | Membrane protein FAM174A OS=Mus musculus GN=Fam174a PE=2 SV=2 -                                                                                        | 38.95 | 1 | 3  | 3  | 13  | 0.927 | 0.973 | 1.011 | 0.916 | 41.75   | 38.95 | 5  | 13  | 190  | 20.0  | 6.79 |
| G5E8R8   | MCG129950, isoform CRA_a OS=Mus musculus GN=Ubxn7 PE=4 SV=1 - [G5E8R8_MOUSE]                                                                           | 34.56 | 6 | 14 | 15 | 40  | 1.259 | 1.088 | 1.161 | 0.916 | 110.09  | 34.56 | 25 | 40  | 489  | 54.8  | 5.16 |
| Q61466-2 | Isoform 1 of SWI/SNF-related matrix-associated actin-dependent regulator of chromatin subfamily D member 1 OS=Mus musculus GN=Smarca21 - [SMRD1_MOUSE] | 23.54 | 2 | 8  | 10 | 20  | 1.099 | 0.876 | 1.128 | 0.916 | 64.33   | 23.54 | 16 | 20  | 514  | 58.0  | 9.17 |
| Q8BUR3-2 | Isoform 2 of Forkhead box protein J3 OS=Mus musculus GN=Foxj3 - [FOXJ3_MOUSE]                                                                          | 5.77  | 4 | 2  | 2  | 5   | 1.458 | 1.131 | 0.958 | 0.916 | 11.63   | 5.77  | 4  | 5   | 589  | 65.5  | 7.17 |
| Q7T573   | Protein FAM101A OS=Mus musculus GN=Fam101a PE=2 SV=1 - [F101A_MOUSE]                                                                                   | 12.25 | 1 | 1  | 1  | 2   | 1.740 | 0.911 | 0.636 | 0.916 | 0.00    | 12.25 | 1  | 2   | 204  | 22.6  | 7.40 |
| P70232   | Neural cell adhesion molecule L1-like protein OS=Mus musculus GN=Chl1 PE=1 SV=2 - [CHL1_MOUSE]                                                         | 42.10 | 1 | 6  | 40 | 159 | 0.952 | 1.048 | 0.827 | 0.916 | 464.40  | 42.10 | 67 | 159 | 1209 | 135.0 | 5.57 |
| Q9WT17-3 | Isoform 3 of Unconventional myosin-Ic OS=Mus musculus GN=Myo1c -                                                                                       | 27.30 | 5 | 24 | 24 | 64  | 0.713 | 1.217 | 0.791 | 0.916 | 195.99  | 27.30 | 40 | 64  | 1044 | 119.8 | 9.39 |
| Q99J83   | Autophagy protein 5 OS=Mus musculus GN=Atg5 PE=1 SV=1 - [ATG5_MOUSE]                                                                                   | 32.36 | 1 | 8  | 8  | 21  | 0.748 | 0.968 | 0.881 | 0.916 | 52.37   | 32.36 | 13 | 21  | 275  | 32.4  | 5.91 |
| Q99KJ8   | Dynactin subunit 2 OS=Mus musculus GN=Dctn2 PE=1 SV=3 - [DCTN2_MOUSE]                                                                                  | 69.40 | 1 | 24 | 25 | 188 | 1.579 | 1.069 | 1.042 | 0.916 | 505.06  | 69.40 | 45 | 188 | 402  | 44.1  | 5.26 |
| Q8CE50   | Sorting nexin-30 OS=Mus musculus GN=Snx30 PE=2 SV=1 - [SNX30_MOUSE]                                                                                    | 47.14 | 1 | 18 | 18 | 54  | 0.892 | 0.969 | 0.699 | 0.916 | 144.96  | 47.14 | 31 | 54  | 437  | 49.5  | 5.35 |
| Q01853   | Transitional endoplasmic reticulum ATPase OS=Mus musculus GN=Vcp PE=1 SV=4 - [TERA_MOUSE]                                                              | 60.30 | 8 | 42 | 43 | 429 | 0.766 | 0.685 | 0.870 | 0.916 | 1159.02 | 60.30 | 80 | 429 | 806  | 89.3  | 5.26 |
| Q9DCC4   | Pyroline-5-carboxylate reductase 3 OS=Mus musculus GN=Pyrc1 PE=2 SV=2 - [P5CR3_MOUSE]                                                                  | 42.34 | 1 | 10 | 10 | 59  | 1.191 | 1.062 | 0.926 | 0.916 | 162.21  | 42.34 | 20 | 59  | 274  | 28.7  | 7.27 |
| Q6PE13   | Proline-rich transmembrane protein 3 OS=Mus musculus GN=Prrt3 PE=1 SV=1 -                                                                              | 25.85 | 1 | 16 | 16 | 85  | 1.062 | 0.936 | 1.036 | 0.916 | 231.57  | 25.85 | 27 | 85  | 971  | 101.2 | 7.52 |
| B2RXW8   | Ppf1a1 protein OS=Mus musculus GN=Ppf1a1 PE=2 SV=1 - [B2RXW8_MOUSE]                                                                                    | 35.70 | 5 | 22 | 40 | 144 | 1.198 | 0.916 | 0.965 | 0.916 | 430.53  | 35.70 | 64 | 144 | 1241 | 140.0 | 6.14 |
| Q9CYC6   | m7GpppN-mRNA hydrolase OS=Mus musculus GN=Dcp2 PE=1 SV=2 - [DCP2_MOUSE]                                                                                | 10.90 | 1 | 4  | 4  | 7   | 0.754 | 0.805 | 1.014 | 0.916 | 14.94   | 10.90 | 5  | 7   | 422  | 48.3  | 7.94 |
| Q8BGA3   | Leucine-rich repeat transmembrane neuronal protein 2 OS=Mus musculus GN=Lrrtm2 PE=2 SV=1 -                                                             | 8.35  | 1 | 3  | 5  | 10  | 0.502 | 1.333 | 0.736 | 0.916 | 26.67   | 8.35  | 8  | 10  | 515  | 58.8  | 8.00 |
| Q9D7P6   | Iron-sulfur cluster assembly enzyme [ISCU], mitochondrial OS=Mus musculus GN=Iscu PE=1 SV=1 - [ISCU_MOUSE]                                             | 50.60 | 4 | 11 | 11 | 47  | 1.683 | 0.843 | 1.147 | 0.916 | 133.15  | 50.60 | 20 | 47  | 168  | 18.1  | 9.29 |
| Q3TTV0   | Phospholipase B1, membrane-associated OS=Mus musculus GN=Pib1 PE=2 SV=2 - [PLB1_MOUSE]                                                                 | 2.77  | 3 | 2  | 2  | 2   | 0.889 | 1.069 | 0.798 | 0.916 | 5.19    | 2.77  | 2  | 2   | 1478 | 164.4 | 6.86 |
| Q3TKT4   | Transcription activator BRG1 OS=Mus musculus GN=Smarca4 PE=1 SV=1 - [SMCA4_MOUSE]                                                                      | 11.28 | 3 | 3  | 17 | 37  | 0.959 | 0.832 | 1.209 | 0.916 | 104.83  | 11.28 | 25 | 37  | 1613 | 181.3 | 8.00 |
| B2RUJ8   | Rho GTPase activating protein 12 OS=Mus musculus GN=Arhgap12 PE=2 SV=1 -                                                                               | 18.33 | 2 | 11 | 11 | 31  | 0.873 | 0.885 | 0.971 | 0.916 | 74.71   | 18.33 | 20 | 31  | 813  | 92.6  | 7.96 |
| Q9WVL1   | AP-4 complex subunit sigma-1 OS=Mus musculus GN=Ap4s1 PE=2 SV=1 - [AP4S1_MOUSE]                                                                        | 13.19 | 1 | 2  | 2  | 4   | 0.859 | 0.769 | 0.790 | 0.916 | 9.80    | 13.19 | 4  | 4   | 144  | 16.8  | 5.34 |
| Q9CQ73   | Plakophilin 2 OS=Mus musculus GN=Pkp2 PE=2 SV=1 - [Q9CQ73_MOUSE]                                                                                       | 2.64  | 3 | 2  | 3  | 7   | 0.397 | 1.604 | 1.036 | 0.916 | 16.98   | 2.64  | 4  | 7   | 795  | 88.0  | 9.33 |
| Q69ZW3-2 | Isoform 2 of EH domain-binding protein 1 OS=Mus musculus GN=Ehbp1 - [EHBP1_MOUSE]                                                                      | 34.74 | 3 | 36 | 37 | 106 | 0.961 | 1.074 | 1.120 | 0.916 | 312.84  | 34.74 | 60 | 106 | 1206 | 136.2 | 5.39 |
| P47968   | Ribose-5-phosphate isomerase OS=Mus musculus GN=Rpia PE=2 SV=2 - [RPIA_MOUSE]                                                                          | 30.03 | 1 | 7  | 7  | 18  | 1.878 | 1.063 | 0.904 | 0.916 | 47.80   | 30.03 | 12 | 18  | 303  | 32.4  | 8.02 |
| Q99J36   | THUMP domain-containing protein 1 OS=Mus musculus GN=Thumpd1 PE=1 SV=1 -                                                                               | 16.29 | 1 | 7  | 7  | 16  | 0.561 | 0.737 | 0.995 | 0.916 | 56.25   | 16.29 | 14 | 16  | 350  | 38.9  | 6.07 |

|        |                                                                                                                               |       |   |    |    |     |       |       |       |       |        |       |    |     |      |       |       |
|--------|-------------------------------------------------------------------------------------------------------------------------------|-------|---|----|----|-----|-------|-------|-------|-------|--------|-------|----|-----|------|-------|-------|
| Q60612 | Adenosine receptor A1<br>OS=Mus musculus<br>GN=Adora1 PE=2 SV=4 -<br>[AA1R_MOUSE]                                             | 3.37  | 1 | 2  | 2  | 3   | 0.517 | 0.870 | 1.316 | 0.916 | 8.75   | 3.37  | 2  | 3   | 326  | 36.6  | 8.48  |
| Q9CXW2 | 28S ribosomal protein S22,<br>mitochondrial OS=Mus<br>musculus GN=Mps22<br>PE=2 SV=1 -<br>[RT22_MOUSE]                        | 34.82 | 1 | 11 | 11 | 33  | 1.317 | 1.018 | 1.083 | 0.917 | 79.74  | 34.82 | 20 | 33  | 359  | 41.2  | 8.56  |
| Q61768 | Kinesin-1 heavy chain<br>OS=Mus musculus<br>GN=Kif5b PE=1 SV=3 -<br>[KINH_MOUSE]                                              | 51.61 | 2 | 34 | 46 | 262 | 1.287 | 0.756 | 1.016 | 0.917 | 785.92 | 51.61 | 82 | 262 | 963  | 109.5 | 6.44  |
| Q8JZU2 | Protein Slc25a1 OS=Mus<br>musculus GN=Slc25a1<br>PE=2 SV=1 -<br>[Q8JZU2_MOUSE]                                                | 42.77 | 2 | 13 | 13 | 76  | 0.871 | 0.712 | 0.658 | 0.917 | 224.99 | 42.77 | 23 | 76  | 311  | 33.9  | 9.89  |
| E9Q9A5 | Bifunctional polynucleotide<br>phosphatase/kinase<br>OS=Mus musculus<br>GN=Ptkp PE=2 SV=1 -<br>[E9Q9A5_MOUSE]                 | 11.73 | 4 | 4  | 4  | 11  | 1.236 | 0.891 | 0.760 | 0.917 | 27.69  | 11.73 | 6  | 11  | 486  | 53.3  | 7.39  |
| Q921F2 | TAR DNA-binding protein<br>43 OS=Mus musculus<br>GN=Tardbp PE=1 SV=1 -<br>[TADBP_MOUSE]                                       | 39.61 | 5 | 11 | 11 | 82  | 0.684 | 0.804 | 0.799 | 0.917 | 228.38 | 39.61 | 19 | 82  | 414  | 44.5  | 6.70  |
| Q6P9R2 | Serine/threonine-protein<br>kinase OSR1 OS=Mus<br>musculus GN=Oxsr1 PE=1<br>SV=1 - [OXSR1_MOUSE]                              | 19.73 | 3 | 7  | 10 | 45  | 0.953 | 0.921 | 0.838 | 0.917 | 122.70 | 19.73 | 17 | 45  | 527  | 58.2  | 6.43  |
| Q8CIS1 | PDZ and LIM domain<br>protein 5 OS=Mus<br>musculus GN=Polim5<br>PE=1 SV=4 -                                                   | 39.09 | 3 | 13 | 18 | 55  | 1.547 | 1.260 | 1.148 | 0.917 | 181.85 | 39.09 | 30 | 55  | 591  | 63.3  | 8.25  |
| Q9Z2Z6 | Mitochondrial<br>carnitine/acylcarnitine<br>carrier protein OS=Mus<br>musculus GN=Slc25a20<br>PE=1 SV=1 -<br>[SLC25A20_MOUSE] | 43.52 | 1 | 14 | 14 | 40  | 0.756 | 0.926 | 0.784 | 0.917 | 95.49  | 43.52 | 25 | 40  | 301  | 33.0  | 9.11  |
| Q8BXV2 | BRI3-binding protein<br>OS=Mus musculus<br>GN=Bri3bp PE=2 SV=1 -<br>[BRI3B_MOUSE]                                             | 19.76 | 1 | 5  | 5  | 27  | 0.622 | 1.112 | 0.826 | 0.917 | 97.62  | 19.76 | 10 | 27  | 253  | 28.2  | 9.52  |
| Q99LH9 | SH3 domain-binding<br>protein 5-like OS=Mus<br>musculus GN=Sh3bp5l<br>PE=1 SV=1 -                                             | 17.60 | 1 | 6  | 6  | 13  | 1.529 | 0.851 | 0.833 | 0.917 | 30.60  | 17.60 | 11 | 13  | 392  | 43.3  | 6.00  |
| Q8K4P0 | pre-mRNA 3' end<br>processing protein WDR33<br>OS=Mus musculus<br>GN=Wdr33 PE=2 SV=1 -<br>[WDR33_MOUSE]                       | 11.73 | 2 | 11 | 12 | 34  | 1.050 | 0.784 | 0.957 | 0.917 | 91.98  | 11.73 | 19 | 34  | 1330 | 145.2 | 9.13  |
| P47963 | 60S ribosomal protein L13<br>OS=Mus musculus<br>GN=Rpl13 PE=2 SV=3 -<br>[RL13_MOUSE]                                          | 19.43 | 2 | 5  | 5  | 25  | 0.645 | 0.595 | 0.768 | 0.917 | 59.97  | 19.43 | 8  | 25  | 211  | 24.3  | 11.55 |
| Q923D3 | Prostate androgen-<br>regulated mucin-like<br>protein 1 homolog<br>OS=Mus musculus<br>GN=Pam1 PE=2 SV=1 -<br>[PAM1_MOUSE]     | 5.74  | 1 | 1  | 1  | 1   | 1.918 | 2.144 | 1.505 | 0.917 | 3.24   | 5.74  | 1  | 1   | 296  | 30.6  | 5.49  |
| Q8K3X4 | Interferon regulatory<br>factor 2-binding protein-<br>like OS=Mus musculus<br>GN=Irf2bp1 PE=1 SV=1 -<br>[I2BPL_MOUSE]         | 22.84 | 1 | 13 | 14 | 35  | 0.998 | 1.259 | 1.064 | 0.917 | 114.03 | 22.84 | 24 | 35  | 775  | 80.5  | 8.24  |
| Q7M729 | Sodium channel subunit<br>beta-4 OS=Mus musculus<br>GN=Scn4b PE=2 SV=1 -<br>[SCN4B_MOUSE]                                     | 19.74 | 1 | 5  | 5  | 19  | 0.769 | 0.347 | 1.788 | 0.917 | 46.94  | 19.74 | 8  | 19  | 228  | 25.2  | 8.82  |
| D3YYW8 | RNA-binding protein 42<br>OS=Mus musculus<br>GN=Rbm42 PE=2 SV=1 -<br>[D3YYW8_MOUSE]                                           | 5.35  | 3 | 3  | 3  | 5   | 1.087 | 0.908 | 0.844 | 0.917 | 12.48  | 5.35  | 4  | 5   | 449  | 47.2  | 9.50  |
| P0C7M9 | C-type lectin domain<br>family 2 member L<br>OS=Mus musculus<br>GN=Clec2l PE=2 SV=1 -<br>[CLC2L_MOUSE]                        | 28.44 | 1 | 7  | 7  | 25  | 0.715 | 0.446 | 0.785 | 0.917 | 73.28  | 28.44 | 12 | 25  | 211  | 23.6  | 7.20  |
| Q8VDD8 | WAS protein family<br>homolog 1 OS=Mus<br>musculus GN=Wash1<br>PE=2 SV=1 -                                                    | 26.53 | 1 | 9  | 10 | 27  | 0.873 | 0.868 | 1.060 | 0.917 | 87.52  | 26.53 | 16 | 27  | 475  | 51.6  | 5.44  |
| Q9DB25 | Dolichyl-phosphate<br>beta-glucosyltransferase<br>OS=Mus musculus<br>GN=Algs5 PE=2 SV=1 -<br>[ALGS_MOUSE]                     | 7.10  | 2 | 2  | 2  | 5   | 0.976 | 0.868 | 0.783 | 0.917 | 14.66  | 7.10  | 3  | 5   | 324  | 36.8  | 8.60  |
| Q7TSJ6 | Serine/threonine-protein<br>kinase LATS2 OS=Mus<br>musculus GN=Lats2 PE=1<br>SV=1 - [LATS2_MOUSE]                             | 4.03  | 4 | 2  | 3  | 4   | 2.199 | 1.289 | 1.072 | 0.917 | 8.92   | 4.03  | 3  | 4   | 1042 | 115.4 | 8.22  |
| Q920N7 | Synaptotagmin-12<br>OS=Mus musculus<br>GN=Sytl12 PE=2 SV=1 -<br>[SYT12_MOUSE]                                                 | 45.37 | 1 | 15 | 15 | 69  | 0.711 | 0.602 | 1.111 | 0.917 | 199.62 | 45.37 | 26 | 69  | 421  | 46.7  | 5.64  |
| B1AXS8 | Zinc finger MYM-type<br>protein 3 OS=Mus<br>musculus GN=Zmym3<br>PE=2 SV=1 -                                                  | 6.71  | 7 | 8  | 8  | 13  | 0.739 | 0.745 | 1.289 | 0.917 | 33.27  | 6.71  | 12 | 13  | 1356 | 151.3 | 6.39  |
| A2AJ26 | ATP-binding cassette sub-<br>family A member 2<br>OS=Mus musculus<br>GN=Abca2 PE=3 SV=1 -<br>[A2AJ26_MOUSE]                   | 12.66 | 2 | 23 | 24 | 60  | 0.936 | 0.673 | 0.798 | 0.917 | 185.36 | 12.66 | 40 | 60  | 2433 | 270.4 | 6.47  |
| E9QAN8 | Protein Pik3c2b OS=Mus<br>musculus GN=Pik3c2b<br>PE=2 SV=1 -<br>[E9QAN8_MOUSE]                                                | 3.19  | 2 | 2  | 4  | 12  | 2.721 | 1.476 | 1.289 | 0.918 | 35.58  | 3.19  | 6  | 12  | 1632 | 184.1 | 7.05  |

|          |                                                                                                                |       |   |    |    |     |       |       |       |       |        |       |    |     |      |       |       |
|----------|----------------------------------------------------------------------------------------------------------------|-------|---|----|----|-----|-------|-------|-------|-------|--------|-------|----|-----|------|-------|-------|
| Q7M6U3-2 | Isoform 2 of Inactive serine/threonine-protein kinase TEX14 OS=Mus musculus GN=Tex14 - [TEX14_MOUSE]           | 2.03  | 3 | 3  | 3  | 4   | 1.463 | 1.267 | 1.054 | 0.918 | 7.13   | 2.03  | 4  | 4   | 1232 | 138.8 | 5.19  |
| P27659   | 60S ribosomal protein L3 OS=Mus musculus GN=Rpl3 PE=2 SV=3 - [RL3_MOUSE]                                       | 38.21 | 3 | 18 | 18 | 102 | 0.616 | 0.801 | 0.740 | 0.918 | 231.69 | 38.21 | 34 | 102 | 403  | 46.1  | 10.21 |
| Q9WVF7   | DNA polymerase epsilon catalytic subunit A OS=Mus musculus GN=Pole PE=2 SV=3 - [DPOE1_MOUSE]                   | 0.70  | 1 | 1  | 1  | 1   | 0.595 | 0.783 | 0.965 | 0.918 | 0.00   | 0.70  | 1  | 1   | 2283 | 261.9 | 6.44  |
| Q6P1D5   | Seizure 6-like protein OS=Mus musculus GN=Sez6l PE=2 SV=1 - [SE6L1_MOUSE]                                      | 18.48 | 2 | 14 | 15 | 47  | 1.008 | 1.324 | 1.171 | 0.918 | 138.86 | 18.48 | 22 | 47  | 963  | 104.8 | 4.69  |
| Q99M07   | Cytochrome c oxidase assembly factor 5 OS=Mus musculus GN=Coa5 PE=2 SV=1 - [COA5_MOUSE]                        | 33.78 | 1 | 2  | 2  | 6   | 0.743 | 0.589 | 1.385 | 0.918 | 16.53  | 33.78 | 4  | 6   | 74   | 8.4   | 8.70  |
| Q9DCP2   | Sodium-coupled neutral amino acid transporter 3 OS=Mus musculus GN=Slc38a3 PE=1 SV=1 - [S38A3_MOUSE]           | 11.68 | 1 | 6  | 6  | 26  | 0.842 | 1.029 | 0.945 | 0.918 | 74.74  | 11.68 | 9  | 26  | 505  | 55.6  | 7.09  |
| P48678   | Prelamin-A/C OS=Mus musculus GN=Lmna PE=1 SV=2 - [LMNA_MOUSE]                                                  | 61.80 | 4 | 39 | 40 | 312 | 1.597 | 1.207 | 1.002 | 0.918 | 873.89 | 61.80 | 73 | 312 | 665  | 74.2  | 6.98  |
| Q8VCD6   | Receptor expression-enhancing protein 2 OS=Mus musculus GN=Reep2 PE=2 SV=2 - [REEP2_MOUSE]                     | 44.88 | 1 | 11 | 11 | 40  | 0.669 | 0.647 | 1.010 | 0.918 | 108.33 | 44.88 | 20 | 40  | 254  | 28.4  | 9.41  |
| Q810C0   | SLIT and NTRK-like protein 2 OS=Mus musculus GN=Slitrk2 PE=1 SV=1 - [SLIK2_MOUSE]                              | 8.27  | 1 | 6  | 6  | 10  | 0.644 | 0.907 | 0.832 | 0.918 | 26.44  | 8.27  | 10 | 10  | 846  | 95.4  | 7.65  |
| Q60829   | Protein phosphatase 1 regulatory subunit 1B OS=Mus musculus GN=Ppp1r1b PE=1 SV=2 - [PPR1B_MOUSE]               | 61.86 | 4 | 10 | 10 | 161 | 0.950 | 0.739 | 3.717 | 0.918 | 457.72 | 61.86 | 17 | 161 | 194  | 21.8  | 4.65  |
| Q9QZH3   | Peptidyl-prolyl cis-trans isomerase E OS=Mus musculus GN=Ppie PE=2 SV=2 - [PPIE_MOUSE]                         | 36.21 | 1 | 8  | 9  | 30  | 1.576 | 1.012 | 1.011 | 0.918 | 71.14  | 36.21 | 14 | 30  | 301  | 33.4  | 5.60  |
| F8VQB2   | Neuronal PAS domain-containing protein 3 OS=Mus musculus GN=Npas3 PE=4 SV=1 - [F8VQB2_MOUSE]                   | 5.73  | 2 | 3  | 3  | 3   | 1.084 | 0.557 | 1.044 | 0.918 | 4.44   | 5.73  | 3  | 3   | 925  | 100.3 | 6.67  |
| Q6ZQ29   | Serine/threonine-protein kinase TAO2 OS=Mus musculus GN=Taok2 PE=1 SV=3 - [TAOK2_MOUSE]                        | 12.66 | 2 | 2  | 15 | 56  | 1.791 | 1.304 | 1.084 | 0.918 | 127.70 | 12.66 | 24 | 56  | 1240 | 139.2 | 7.06  |
| Q5RJG7-5 | Isoform 5 of Isoprenoid synthase domain-containing protein OS=Mus musculus GN=Ispd - [ISPD_MOUSE]              | 20.76 | 5 | 7  | 7  | 18  | 1.202 | 1.245 | 0.885 | 0.918 | 52.48  | 20.76 | 12 | 18  | 419  | 46.3  | 6.52  |
| B1APX2   | Protein 5031439G07Rik OS=Mus musculus GN=5031439G07Rik PE=2 SV=1 - [B1APX2_MOUSE]                              | 14.99 | 2 | 6  | 6  | 17  | 0.974 | 0.454 | 0.922 | 0.918 | 57.29  | 14.99 | 11 | 17  | 447  | 50.2  | 8.09  |
| P12658   | Calbindin OS=Mus musculus GN=Calb1 PE=1 SV=2 - [CALB1_MOUSE]                                                   | 79.69 | 1 | 17 | 18 | 347 | 1.863 | 2.087 | 1.321 | 0.919 | 863.73 | 79.69 | 32 | 347 | 261  | 30.0  | 4.83  |
| O55137   | Acyl-coenzyme A thioesterase 1 OS=Mus musculus GN=Acot1 PE=1 SV=1 - [ACOT1_MOUSE]                              | 44.63 | 1 | 5  | 14 | 48  | 1.708 | 0.999 | 0.822 | 0.919 | 152.83 | 44.63 | 27 | 48  | 419  | 46.1  | 6.58  |
| Q9CWE6   | Oocyte-expressed protein homolog OS=Mus musculus GN=Ooep PE=1 SV=1 - [OOEP_MOUSE]                              | 6.71  | 1 | 1  | 1  | 1   | 0.785 | 0.841 | 1.030 | 0.919 | 0.00   | 6.71  | 1  | 1   | 164  | 18.4  | 6.01  |
| Q6A028   | Switch-associated protein 70 OS=Mus musculus GN=Swap70 PE=1 SV=2 - [SWP70_MOUSE]                               | 22.91 | 1 | 11 | 11 | 24  | 1.296 | 1.174 | 0.974 | 0.919 | 64.12  | 22.91 | 20 | 24  | 585  | 69.0  | 6.05  |
| P26516   | 26S proteasome non-ATPase regulatory subunit 7 OS=Mus musculus GN=Psm7 PE=1 SV=2 - [PSMD7_MOUSE]               | 53.27 | 1 | 12 | 12 | 43  | 0.688 | 0.948 | 0.785 | 0.919 | 139.56 | 53.27 | 21 | 43  | 321  | 36.5  | 6.77  |
| Q8QZR0   | Translocating chain-associated membrane protein 1-like 1 OS=Mus musculus GN=Tram1l1 PE=2 SV=1 - [TRM1L1_MOUSE] | 3.31  | 1 | 1  | 1  | 1   | 0.944 | 0.857 | 0.464 | 0.919 | 2.95   | 3.31  | 1  | 1   | 363  | 41.0  | 9.45  |
| Q9JKY5   | Huntingtin-interacting protein 1-related protein OS=Mus musculus GN=Hip1r PE=1 SV=2 - [HIP1R_MOUSE]            | 45.41 | 3 | 42 | 44 | 165 | 0.837 | 0.779 | 0.952 | 0.919 | 468.73 | 45.41 | 77 | 165 | 1068 | 119.4 | 6.52  |
| Q802F8   | Brain-specific angiogenesis inhibitor 3 OS=Mus musculus GN=Bei3 PE=1 SV=2 - [BAT3_MOUSE]                       | 15.44 | 4 | 16 | 20 | 50  | 0.897 | 1.752 | 1.630 | 0.919 | 127.90 | 15.44 | 30 | 50  | 1522 | 171.2 | 7.02  |
| O09000   | Nuclear receptor coactivator 3 OS=Mus musculus GN=Ncoa3 PE=1 SV=2 - [NCOA3_MOUSE]                              | 2.07  | 3 | 2  | 3  | 4   | 1.623 | 0.919 | 0.839 | 0.919 | 9.15   | 2.07  | 3  | 4   | 1398 | 151.5 | 7.77  |

|          |                                                                                                                        |       |    |    |    |     |       |       |       |       |        |       |    |     |      |       |      |
|----------|------------------------------------------------------------------------------------------------------------------------|-------|----|----|----|-----|-------|-------|-------|-------|--------|-------|----|-----|------|-------|------|
| O88983   | Syntaxin-8 OS=Mus musculus GN=Sbx8 PE=1 SV=1 - [STX8_MOUSE]                                                            | 26.69 | 2  | 6  | 6  | 18  | 0.614 | 0.786 | 0.892 | 0.919 | 60.50  | 26.69 | 11 | 18  | 236  | 26.9  | 5.01 |
| Q05186   | Reticulocalbin-1 OS=Mus musculus GN=Rcn1 PE=1 SV=1 - [RCN1_MOUSE]                                                      | 32.92 | 1  | 11 | 11 | 26  | 1.578 | 1.647 | 1.074 | 0.919 | 65.73  | 32.92 | 16 | 26  | 325  | 38.1  | 4.84 |
| Q3UQ44   | Ras GTPase-activating-like protein IQGAP2 OS=Mus musculus GN=Iqgap2 PE=1 SV=2 - [IQGA2_MOUSE]                          | 13.71 | 1  | 14 | 17 | 31  | 0.780 | 2.025 | 1.103 | 0.919 | 92.16  | 13.71 | 26 | 31  | 1575 | 180.4 | 5.64 |
| Q60625   | Intercellular adhesion molecule 5 OS=Mus musculus GN=Icam5 PE=1 SV=2 - [ICAM5_MOUSE]                                   | 29.77 | 1  | 21 | 22 | 117 | 0.777 | 4.992 | 2.903 | 0.919 | 334.63 | 29.77 | 39 | 117 | 917  | 96.9  | 6.32 |
| Q9CR40   | Kelch-like protein 28 OS=Mus musculus GN=Klh28 PE=2 SV=1 - [KLH28_MOUSE]                                               | 3.85  | 2  | 2  | 2  | 2   | 0.781 | 0.779 | 0.946 | 0.919 | 2.89   | 3.85  | 2  | 2   | 571  | 64.1  | 5.96 |
| G3UW60   | MCG14773 OS=Mus musculus GN=Susd5 PE=4 SV=1 - [G3UW60_MOUSE]                                                           | 5.01  | 1  | 4  | 4  | 6   | 0.895 | 1.003 | 0.968 | 0.919 | 16.17  | 5.01  | 6  | 6   | 619  | 66.8  | 4.93 |
| Q57114   | Tyrosine-protein kinase Sgk223 OS=Mus musculus GN=Sgk223 PE=2 SV=2 - [SG223_MOUSE]                                     | 3.39  | 2  | 3  | 3  | 10  | 0.810 | 1.322 | 1.207 | 0.919 | 40.96  | 3.39  | 6  | 10  | 1179 | 126.6 | 7.21 |
| Q91W39   | Nuclear receptor coactivator 5 OS=Mus musculus GN=Ncoa5 PE=1 SV=1 - [NCOA5_MOUSE]                                      | 25.73 | 4  | 10 | 10 | 24  | 0.869 | 0.818 | 0.981 | 0.919 | 67.52  | 25.73 | 17 | 24  | 579  | 65.3  | 9.82 |
| E0CX81   | Glucose 1,6-bisphosphate synthase OS=Mus musculus GN=Pgm2l1 PE=2 SV=1 - [Pgm2l1_MOUSE]                                 | 47.43 | 1  | 1  | 15 | 82  | 0.305 | 0.898 | 1.453 | 0.919 | 236.49 | 47.43 | 28 | 82  | 253  | 28.9  | 7.15 |
| H7BX02   | Probable E3 ubiquitin-protein ligase Roquin OS=Mus musculus GN=Rc3h1 PE=2 SV=1 - [H7BX02_MOUSE]                        | 17.66 | 2  | 11 | 12 | 30  | 1.208 | 1.009 | 1.098 | 0.919 | 77.29  | 17.66 | 18 | 30  | 1121 | 124.3 | 7.18 |
| Q91W50   | Cold shock domain-containing protein E1 OS=Mus musculus GN=Csd1 PE=2 SV=1 - [CSD1_MOUSE]                               | 51.25 | 1  | 35 | 35 | 130 | 1.275 | 0.882 | 1.031 | 0.919 | 347.02 | 51.25 | 60 | 130 | 798  | 88.7  | 6.37 |
| Q7TPES   | Probable RNA polymerase II nuclear localization protein SLC7A6OS OS=Mus musculus GN=Slc7a6os PE=1 SV=1 - [S7A6O_MOUSE] | 3.59  | 1  | 1  | 1  | 2   | 1.384 | 0.892 | 1.100 | 0.919 | 5.12   | 3.59  | 2  | 2   | 306  | 35.0  | 4.58 |
| Q8VC98-2 | Isoform 2 of Pleckstrin homology domain-containing family A member 4 OS=Mus musculus GN=Flekh4 - [Flekh4_MOUSE]        | 5.07  | 6  | 2  | 2  | 2   | 0.844 | 0.609 | 0.935 | 0.919 | 1.93   | 5.07  | 2  | 2   | 473  | 52.0  | 7.96 |
| E9Q0V6   | NHS-like protein 2 OS=Mus musculus GN=Nhs2 PE=2 SV=1 - [E9Q0V6_MOUSE]                                                  | 16.16 | 2  | 12 | 12 | 31  | 0.797 | 1.264 | 1.739 | 0.919 | 80.90  | 16.16 | 19 | 31  | 1219 | 132.3 | 8.48 |
| P26040   | Ezrin OS=Mus musculus GN=Ezr PE=1 SV=3 - [F7R1_MOUSE]                                                                  | 36.69 | 1  | 13 | 24 | 103 | 0.960 | 1.226 | 1.516 | 0.920 | 269.52 | 36.69 | 42 | 103 | 586  | 69.4  | 6.10 |
| Q9WV31   | Activity-regulated cytoskeleton-associated protein OS=Mus musculus GN=Arc PE=1 SV=1 - [ARC_MOUSE]                      | 8.84  | 1  | 3  | 3  | 10  | 0.826 | 2.111 | 1.918 | 0.920 | 30.49  | 8.84  | 6  | 10  | 396  | 45.3  | 5.39 |
| O35737   | Heterogeneous nuclear ribonucleoprotein H OS=Mus musculus GN=Hnrnp1 PE=1 SV=3 - [HNRH1_MOUSE]                          | 53.23 | 3  | 9  | 17 | 278 | 1.199 | 0.955 | 0.932 | 0.920 | 901.62 | 53.23 | 30 | 278 | 449  | 49.2  | 6.30 |
| P51150   | Ras-related protein Rab-7a OS=Mus musculus GN=Rab7a PE=1 SV=2 - [RAB7A_MOUSE]                                          | 77.78 | 1  | 17 | 18 | 138 | 0.729 | 0.881 | 0.855 | 0.920 | 430.37 | 77.78 | 32 | 138 | 207  | 23.5  | 6.70 |
| Q2HXL6   | ER degradation-enhancing alpha-mannosidase-like protein 3 OS=Mus musculus GN=Edem3 PE=1 SV=2 - [EDM3_MOUSE]            | 3.22  | 1  | 2  | 3  | 8   | 1.276 | 1.163 | 1.156 | 0.920 | 15.07  | 3.22  | 6  | 8   | 931  | 104.1 | 5.06 |
| F7C259   | WD repeat domain-containing protein 83 (Fragment) OS=Mus musculus GN=Wdr83 PE=4 SV=1 - [WDR83_MOUSE]                   | 27.27 | 3  | 1  | 1  | 1   | 1.253 | 1.606 | 0.897 | 0.920 | 0.00   | 27.27 | 1  | 1   | 55   | 6.5   | 5.71 |
| Q9CPR8   | Melanoma-associated antigen G1 OS=Mus musculus GN=Ndn12 PE=1 SV=1 - [MAGG1_MOUSE]                                      | 3.94  | 1  | 1  | 1  | 2   | 1.304 | 1.398 | 0.915 | 0.920 | 4.48   | 3.94  | 2  | 2   | 279  | 31.4  | 9.07 |
| Q9CWY6   | RNA-binding protein with multiple-splicing 2 OS=Mus musculus GN=Rbpms2 PE=2 SV=1 - [Q9CWY6_MOUSE]                      | 11.31 | 1  | 1  | 1  | 1   | 1.787 | 1.882 | 1.173 | 0.920 | 3.34   | 11.31 | 1  | 1   | 168  | 18.3  | 9.29 |
| H3BDX7   | Calcium-transporting ATPase type 2C member 1 OS=Mus musculus GN=Atp2c1 PE=2 SV=1 - [H3BDX7_MOUSE]                      | 22.89 | 12 | 16 | 18 | 64  | 0.734 | 1.027 | 0.920 | 0.920 | 156.67 | 22.89 | 31 | 64  | 926  | 101.2 | 7.44 |
| F6UI76   | F-box only protein 44 (Fragment) OS=Mus musculus GN=Fbxo44 PE=4 SV=1 - [FBXO44_MOUSE]                                  | 9.72  | 10 | 1  | 2  | 3   | 1.071 | 1.114 | 0.887 | 0.920 | 4.58   | 9.72  | 2  | 3   | 144  | 16.9  | 5.21 |

|          |                                                                                                                                           |       |    |    |    |     |       |       |       |       |        |       |    |     |      |       |      |
|----------|-------------------------------------------------------------------------------------------------------------------------------------------|-------|----|----|----|-----|-------|-------|-------|-------|--------|-------|----|-----|------|-------|------|
| Q05860-5 | Isoform 5 of Formin-1<br>OS=Mus musculus<br>GN=Fmn1 -<br>[FMN1_MOUSE]                                                                     | 1.66  | 2  | 1  | 2  | 3   | 1.672 | 1.246 | 1.618 | 0.920 | 0.00   | 1.66  | 2  | 3   | 1204 | 133.1 | 5.71 |
| Q9R1Z7   | 6-pyruvoyl<br>tetrahydrobiopterin<br>synthase OS=Mus<br>musculus GN=Pts PE=2<br>SV=2 - [PTPS_MOUSE]                                       | 39.58 | 1  | 6  | 6  | 34  | 1.584 | 1.192 | 0.907 | 0.920 | 102.96 | 39.58 | 12 | 34  | 144  | 16.2  | 6.52 |
| P21126   | Ubiquitin-like protein 4A<br>OS=Mus musculus<br>GN=Ubl4a PE=2 SV=1 -<br>[UBL4A_MOUSE]                                                     | 59.87 | 2  | 9  | 9  | 41  | 1.324 | 0.979 | 1.002 | 0.920 | 117.48 | 59.87 | 16 | 41  | 157  | 17.8  | 8.44 |
| Q8VE70   | Programmed cell death<br>protein 10 OS=Mus<br>musculus GN=Pcdc10<br>PE=1 SV=1 -                                                           | 38.68 | 3  | 8  | 8  | 30  | 0.982 | 1.381 | 0.889 | 0.920 | 79.94  | 38.68 | 14 | 30  | 212  | 24.7  | 8.19 |
| Q8K093   | Thyrotropin-releasing<br>hormone-degrading<br>ectoenzyme OS=Mus<br>musculus GN=Trhde PE=2<br>SV=1 - [TRHDE_MOUSE]                         | 11.41 | 1  | 8  | 8  | 13  | 1.004 | 0.973 | 0.940 | 0.920 | 21.13  | 11.41 | 11 | 13  | 1025 | 117.4 | 7.06 |
| Q9JHW4   | Selenocysteine-specific<br>elongation factor OS=Mus<br>musculus GN=Efsec<br>PE=2 SV=2 -<br>[SELB_MOUSE]                                   | 16.98 | 1  | 8  | 8  | 18  | 1.008 | 1.043 | 0.906 | 0.920 | 44.07  | 16.98 | 12 | 18  | 583  | 63.5  | 8.29 |
| Q91X84   | CREB-regulated<br>transcription coactivator 3<br>OS=Mus musculus<br>GN=Crtc3 PE=2 SV=2 -<br>[CRTC3_MOUSE]                                 | 5.98  | 2  | 3  | 3  | 8   | 1.799 | 1.110 | 1.029 | 0.920 | 23.09  | 5.98  | 6  | 8   | 619  | 67.0  | 6.83 |
| P59240   | Nephrocystin-4 OS=Mus<br>musculus GN=Nphp4<br>PE=1 SV=2 -<br>[NPHP4_MOUSE]                                                                | 4.14  | 1  | 4  | 4  | 13  | 0.615 | 1.171 | 0.991 | 0.920 | 37.76  | 4.14  | 8  | 13  | 1425 | 157.2 | 7.77 |
| P32043   | Homeobox protein Hox-C5<br>OS=Mus musculus<br>GN=Hoxc5 PE=2 SV=3 -<br>[HXC5_MOUSE]                                                        | 11.71 | 1  | 2  | 2  | 3   | 1.637 | 1.090 | 0.882 | 0.921 | 6.00   | 11.71 | 2  | 3   | 222  | 25.0  | 9.52 |
| Q8CC14   | APC membrane<br>recruitment protein 2<br>OS=Mus musculus<br>GN=Amer2 PE=1 SV=2 -                                                          | 23.51 | 2  | 15 | 15 | 47  | 1.244 | 0.891 | 1.339 | 0.921 | 121.61 | 23.51 | 26 | 47  | 672  | 69.9  | 6.64 |
| Q921L5   | Conserved oligomeric Golgi<br>complex subunit 2<br>OS=Mus musculus<br>GN=Cog2 PE=2 SV=2 -<br>[COG2_MOUSE]                                 | 23.12 | 2  | 13 | 14 | 29  | 0.872 | 0.993 | 0.671 | 0.921 | 90.33  | 23.12 | 22 | 29  | 731  | 82.0  | 6.21 |
| O09010   | Beta-1,3-N-<br>acetylglucosaminyltransfer<br>ase lunatic fringe OS=Mus<br>musculus GN=Lfng PE=1<br>SV=1 - [LFNG_MOUSE]                    | 3.97  | 1  | 1  | 1  | 2   | 0.958 | 0.405 | 0.825 | 0.921 | 3.76   | 3.97  | 2  | 2   | 378  | 41.9  | 8.81 |
| Q91W52   | Transmembrane protein 19<br>OS=Mus musculus<br>GN=Tmem19 PE=2 SV=1 -<br>[TMM19_MOUSE]                                                     | 3.87  | 2  | 1  | 1  | 4   | 0.562 | 0.713 | 0.782 | 0.921 | 13.50  | 3.87  | 2  | 4   | 336  | 36.3  | 7.72 |
| Q06890   | Clusterin OS=Mus<br>musculus GN=Clu PE=1<br>SV=1 - [CLUS_MOUSE]                                                                           | 35.04 | 6  | 15 | 15 | 128 | 1.137 | 1.353 | 1.055 | 0.921 | 373.14 | 35.04 | 29 | 128 | 448  | 51.6  | 5.67 |
| E9PUB7   | Protein misato homolog 1<br>OS=Mus musculus<br>GN=Msto1 PE=2 SV=1 -<br>[E9PUB7_MOUSE]                                                     | 15.47 | 4  | 8  | 8  | 25  | 0.763 | 0.734 | 0.722 | 0.921 | 74.06  | 15.47 | 13 | 25  | 556  | 61.2  | 6.46 |
| Q8CI96   | CAP-Gly domain-<br>containing linker protein 4<br>OS=Mus musculus<br>GN=Clp4 PE=1 SV=1 -<br>[CLIP4_MOUSE]                                 | 8.38  | 2  | 3  | 5  | 10  | 0.993 | 1.152 | 0.975 | 0.921 | 24.04  | 8.38  | 10 | 10  | 704  | 75.7  | 8.62 |
| Q9D753   | Exosome complex<br>component RRP43<br>OS=Mus musculus<br>GN=Exos3 PE=2 SV=1 -<br>[EXOS3_MOUSE]                                            | 9.78  | 3  | 3  | 3  | 5   | 1.354 | 1.183 | 0.722 | 0.921 | 7.99   | 9.78  | 4  | 5   | 276  | 29.9  | 5.20 |
| P42208   | Septin-2 OS=Mus<br>musculus GN=Sept2 PE=1<br>SV=2 - [SEPT2_MOUSE]                                                                         | 66.76 | 10 | 16 | 17 | 144 | 1.355 | 0.712 | 0.932 | 0.921 | 432.37 | 66.76 | 33 | 144 | 361  | 41.5  | 6.55 |
| B1ASU0   | Interleukin-1 receptor<br>accessory protein-like 1<br>OS=Mus musculus<br>GN=Il1rap1 PE=4 SV=1 -<br>[B1ASU0_MOUSE]                         | 11.21 | 3  | 6  | 7  | 14  | 0.788 | 2.329 | 1.251 | 0.921 | 41.74  | 11.21 | 10 | 14  | 696  | 79.7  | 6.32 |
| Q64511   | DNA topoisomerase 2-beta<br>OS=Mus musculus<br>GN=Top2b PE=1 SV=2 -<br>[TOP2B_MOUSE]                                                      | 26.49 | 7  | 38 | 40 | 91  | 0.677 | 0.924 | 0.939 | 0.921 | 246.69 | 26.49 | 62 | 91  | 1612 | 181.8 | 8.29 |
| Q8BTZ4-2 | Isoform 2 of Anaphase-<br>promoting complex<br>subunit 5 OS=Mus<br>musculus GN=Anapc5 -<br>[APC5_MOUSE]                                   | 9.08  | 2  | 6  | 7  | 15  | 1.236 | 1.042 | 0.804 | 0.921 | 34.93  | 9.08  | 10 | 15  | 727  | 81.6  | 6.71 |
| Q9R1P4   | Proteasome subunit alpha<br>type-1 OS=Mus musculus<br>GN=Psm1 PE=1 SV=1 -<br>[PSA1_MOUSE]                                                 | 67.30 | 1  | 16 | 16 | 114 | 1.869 | 0.930 | 0.793 | 0.921 | 322.52 | 67.30 | 29 | 114 | 263  | 29.5  | 6.46 |
| Q6ZQK5   | Arf-GAP with coiled-coil,<br>ANK repeat and PH<br>domain-containing protein<br>2 OS=Mus musculus<br>GN=Acap2 PE=1 SV=2 -<br>[ACAP2_MOUSE] | 25.58 | 4  | 15 | 17 | 55  | 0.812 | 1.256 | 1.205 | 0.921 | 183.57 | 25.58 | 27 | 55  | 770  | 87.2  | 6.68 |
| Q91VL8   | Telomeric repeat-binding<br>factor 2-interacting protein<br>1 OS=Mus musculus<br>GN=Terf2ip PE=1 SV=1 -<br>[TE2IP_MOUSE]                  | 32.32 | 1  | 9  | 9  | 25  | 1.432 | 0.816 | 0.996 | 0.921 | 68.17  | 32.32 | 16 | 25  | 393  | 43.3  | 4.81 |



|          |                                                                                                                                                |       |    |    |     |     |       |       |       |       |         |       |     |     |      |       |       |
|----------|------------------------------------------------------------------------------------------------------------------------------------------------|-------|----|----|-----|-----|-------|-------|-------|-------|---------|-------|-----|-----|------|-------|-------|
| Q9JJC6   | RILP-like protein 1<br>OS=Mus musculus<br>GN=Rilp1 PE=1 SV=1 -<br>[RILP1_MOUSE]                                                                | 39.66 | 2  | 13 | 14  | 40  | 1.249 | 2.212 | 1.223 | 0.921 | 125.52  | 39.66 | 25  | 40  | 406  | 47.3  | 5.16  |
| Q8K382   | DENN domain-containing<br>protein 1A OS=Mus<br>musculus GN=Dennd1a<br>PE=1 SV=2 -<br>[DEN1A_MOUSE]                                             | 11.91 | 3  | 9  | 10  | 23  | 1.302 | 1.546 | 1.272 | 0.922 | 72.31   | 11.91 | 17  | 23  | 1016 | 111.5 | 6.79  |
| A2AWA9   | Rab GTPase-activating<br>protein 1 OS=Mus<br>musculus GN=Rabgap1<br>PE=2 SV=1 -                                                                | 28.38 | 5  | 23 | 26  | 80  | 1.013 | 1.128 | 0.951 | 0.922 | 211.04  | 28.38 | 43  | 80  | 1064 | 120.7 | 5.25  |
| P19221   | Prothrombin OS=Mus<br>musculus GN=F2 PE=1<br>SV=1 - [THR3_MOUSE]                                                                               | 27.67 | 3  | 15 | 16  | 52  | 4.055 | 2.377 | 0.498 | 0.922 | 137.66  | 27.67 | 30  | 52  | 618  | 70.2  | 6.43  |
| D6R1J8   | CD209 antigen-like protein<br>C OS=Mus musculus<br>GN=Cd209c PE=2 SV=1 -<br>[D6R1J8_MOUSE]                                                     | 12.73 | 2  | 1  | 1   | 1   | 5.826 | 0.659 | 1.669 | 0.922 | 2.98    | 12.73 | 1   | 1   | 110  | 12.3  | 9.06  |
| Q9Z2N8   | Actin-like protein 6A<br>OS=Mus musculus<br>GN=Actf6a PE=1 SV=2 -<br>[ACL6A_MOUSE]                                                             | 27.04 | 2  | 7  | 9   | 17  | 1.013 | 0.836 | 0.732 | 0.922 | 44.27   | 27.04 | 14  | 17  | 429  | 47.4  | 5.60  |
| Q5U430-3 | Isoform 3 of E3 ubiquitin-<br>protein ligase UBR3<br>OS=Mus musculus<br>GN=Ubr3 -                                                              | 11.48 | 5  | 18 | 19  | 53  | 0.711 | 0.911 | 1.023 | 0.922 | 136.16  | 11.48 | 32  | 53  | 1769 | 198.5 | 5.67  |
| Q8CI59   | Metalloendopeptidase STEAP3<br>OS=Mus musculus<br>GN=Steap3 PE=1 SV=1 -<br>[STEA3_MOUSE]                                                       | 14.75 | 4  | 6  | 6   | 13  | 1.012 | 0.960 | 0.884 | 0.922 | 24.67   | 14.75 | 11  | 13  | 488  | 54.7  | 9.22  |
| Q3U3J1   | 2-oxoisovalerate<br>dehydrogenase subunit<br>alpha, mitochondrial<br>OS=Mus musculus<br>GN=Bckdha PE=2 SV=1 -<br>[BCKDHA_MOUSE]                | 51.12 | 2  | 17 | 17  | 88  | 0.919 | 0.929 | 0.804 | 0.922 | 262.13  | 51.12 | 29  | 88  | 446  | 50.7  | 8.06  |
| O8B487   | Cytoplasmic dynein 1<br>intermediate chain 2<br>OS=Mus musculus<br>GN=Dync1i2 PE=2 SV=1 -<br>[DC1I2_MOUSE]                                     | 25.49 | 2  | 1  | 10  | 76  | 3.142 | 0.381 | 0.748 | 0.922 | 178.34  | 25.49 | 18  | 76  | 612  | 68.4  | 5.29  |
| Q6P9Q4   | FH1/FH2 domain-<br>containing protein 1<br>OS=Mus musculus<br>GN=Fhod1 PE=2 SV=3 -                                                             | 4.34  | 1  | 3  | 3   | 4   | 0.931 | 1.270 | 1.048 | 0.922 | 8.69    | 4.34  | 3   | 4   | 1197 | 129.5 | 6.28  |
| Q80Y56   | Rabenosyn-5 OS=Mus<br>musculus GN=Zfyve20<br>PE=2 SV=1 -<br>[RBNS5_MOUSE]                                                                      | 17.37 | 1  | 11 | 11  | 39  | 1.385 | 1.023 | 1.129 | 0.923 | 132.26  | 17.37 | 20  | 39  | 783  | 88.4  | 5.30  |
| Q8B2R9   | Uncharacterized protein<br>C17orf85 homolog<br>OS=Mus musculus PE=1<br>SV=1 - [CQ085_MOUSE]                                                    | 14.15 | 1  | 7  | 8   | 14  | 0.818 | 0.720 | 1.020 | 0.923 | 32.80   | 14.15 | 12  | 14  | 615  | 70.0  | 5.80  |
| E9PZ19   | Protein Igsf9b OS=Mus<br>musculus GN=Igsf9b PE=2<br>SV=1 - [E9PZ19_MOUSE]                                                                      | 17.39 | 2  | 20 | 20  | 36  | 0.937 | 0.704 | 1.002 | 0.923 | 106.20  | 17.39 | 31  | 36  | 1328 | 144.9 | 6.70  |
| Q6PAN7   | Proline-rich protein 18<br>OS=Mus musculus<br>GN=Prr18 PE=2 SV=2 -<br>[PRR18_MOUSE]                                                            | 20.85 | 2  | 3  | 3   | 8   | 1.343 | 0.407 | 0.849 | 0.923 | 34.85   | 20.85 | 6   | 8   | 307  | 32.2  | 11.11 |
| O35089   | Protein cornichon homolog<br>2 OS=Mus musculus<br>GN=Cnih2 PE=1 SV=2 -<br>[CNIH2_MOUSE]                                                        | 8.75  | 1  | 1  | 1   | 1   | 2.550 | 2.092 | 1.167 | 0.923 | 3.41    | 8.75  | 1   | 1   | 160  | 18.9  | 7.25  |
| Q91VD8   | MCG141290 OS=Mus<br>musculus GN=Pcdhb17<br>PE=2 SV=1 -<br>[Q91VD8_MOUSE]                                                                       | 0.88  | 1  | 1  | 1   | 1   | 0.953 | 1.212 | 1.052 | 0.923 | 1.73    | 0.88  | 1   | 1   | 799  | 87.7  | 4.86  |
| B1AXN9   | Ribosomal protein S6<br>kinase alpha-3 OS=Mus<br>musculus GN=Rps6ka3<br>PE=2 SV=1 -                                                            | 28.09 | 14 | 9  | 19  | 53  | 0.874 | 1.089 | 1.003 | 0.923 | 135.58  | 28.09 | 32  | 53  | 712  | 80.6  | 7.15  |
| Q61043-2 | Isoform 2 of Ninein<br>OS=Mus musculus<br>GN=Nin - [NIN_MOUSE]<br>F1<br>Dystonin OS=Mus<br>musculus GN=Dst PE=1<br>SV=1 - [DYST_MOUSE]         | 1.48  | 3  | 2  | 3   | 3   | 1.488 | 0.933 | 0.952 | 0.923 | 3.31    | 1.48  | 3   | 3   | 2026 | 233.5 | 4.97  |
| Q91ZU6   | Dystonin OS=Mus<br>musculus GN=Dst PE=1<br>SV=1 - [DYST_MOUSE]                                                                                 | 24.24 | 5  | 2  | 160 | 508 | 0.496 | 0.413 | 0.854 | 0.923 | 1474.41 | 24.24 | 266 | 508 | 7389 | 833.1 | 5.31  |
| E9PYH6   | Protein Setd1a OS=Mus<br>musculus GN=Setd1a<br>PE=4 SV=1 -<br>[E9PYH6_MOUSE]                                                                   | 4.25  | 2  | 5  | 5   | 11  | 0.724 | 0.847 | 0.945 | 0.923 | 35.50   | 4.25  | 9   | 11  | 1716 | 185.9 | 5.06  |
| F7B2J7   | Mucopolipin-2 (Fragment)<br>OS=Mus musculus<br>GN=Mcoln2 PE=2 SV=1 -<br>[F7B2J7_MOUSE]                                                         | 8.85  | 1  | 1  | 1   | 1   | 0.906 | 1.102 | 1.416 | 0.923 | 1.66    | 8.85  | 1   | 1   | 113  | 12.9  | 9.22  |
| AZABR0   | MCG17975 OS=Mus<br>musculus GN=Zfyve9<br>PE=4 SV=1 -<br>[AZABR0_MOUSE]                                                                         | 11.02 | 3  | 9  | 10  | 25  | 1.216 | 0.765 | 1.097 | 0.923 | 79.50   | 11.02 | 18  | 25  | 1397 | 152.3 | 5.00  |
| ABY5Q0   | [Pyruvate dehydrogenase<br>[acetyl-transferring]]-<br>phosphatase 1,<br>mitochondrial OS=Mus<br>musculus GN=Pdp1 PE=2<br>SV=1 - [ABY5Q0_MOUSE] | 44.81 | 4  | 17 | 17  | 66  | 0.828 | 0.886 | 0.936 | 0.923 | 210.38  | 44.81 | 31  | 66  | 578  | 65.4  | 6.90  |
| Q9D4H2   | GRIP and coiled-coil<br>domain-containing protein<br>1 OS=Mus musculus<br>GN=Gcc1 PE=1 SV=2 -<br>[GCC1_MOUSE]                                  | 18.12 | 2  | 11 | 14  | 48  | 1.310 | 0.970 | 1.073 | 0.923 | 107.12  | 18.12 | 22  | 48  | 778  | 87.6  | 5.54  |
| Q9CWW6   | Peptidyl-prolyl cis-trans<br>isomerase NIMA-<br>interacting 4 OS=Mus<br>musculus GN=Pin4 PE=2<br>SV=1 - [PIN4_MOUSE]                           | 30.53 | 1  | 4  | 4   | 18  | 1.479 | 0.473 | 1.089 | 0.923 | 52.10   | 30.53 | 7   | 18  | 131  | 13.8  | 9.77  |

|          |                                                                                                                             |       |    |     |     |     |       |       |       |       |         |       |     |     |      |       |       |
|----------|-----------------------------------------------------------------------------------------------------------------------------|-------|----|-----|-----|-----|-------|-------|-------|-------|---------|-------|-----|-----|------|-------|-------|
| Q0KL01   | UBX domain-containing protein 2B OS=Mus musculus GN=Ubx2b PE=1 SV=2                                                         | 42.90 | 1  | 10  | 10  | 31  | 1.572 | 1.175 | 1.200 | 0.923 | 89.55   | 42.90 | 17  | 31  | 331  | 37.4  | 5.94  |
| Q91ZK7   | Prolow-density lipoprotein receptor-related protein 1 OS=Mus musculus GN=Lrp1 PE=1 SV=1 [LRP1_MOUSE]                        | 27.52 | 3  | 100 | 105 | 484 | 1.100 | 1.085 | 0.924 | 0.923 | 1504.58 | 27.52 | 188 | 484 | 4545 | 504.4 | 5.36  |
| Q8CJG1   | Protein argonaute-1 OS=Mus musculus GN=Ago1 PE=1 SV=2 [AGO1_MOUSE]                                                          | 26.14 | 4  | 7   | 18  | 53  | 1.288 | 0.910 | 0.773 | 0.923 | 166.33  | 26.14 | 32  | 53  | 857  | 97.2  | 9.16  |
| Q9EQS9   | Immunoglobulin superfamily DCC subclass member 4 OS=Mus musculus GN=Igdcc4 PE=2 SV=1 [IGDCC4_MOUSE]                         | 7.11  | 2  | 4   | 4   | 7   | 0.750 | 1.923 | 1.070 | 0.923 | 18.24   | 7.11  | 6   | 7   | 1252 | 134.7 | 6.18  |
| Q01815-2 | isoform 2 of Voltage-dependent L-type calcium channel subunit alpha-1C OS=Mus musculus GN=Cacn1c1 PE=1 SV=1 [CACN1C1_MOUSE] | 9.59  | 15 | 12  | 14  | 35  | 0.754 | 1.517 | 1.186 | 0.924 | 98.27   | 9.59  | 22  | 35  | 2128 | 238.8 | 6.93  |
| E9Q132   | 60S ribosomal protein L24 OS=Mus musculus GN=Rpl24 PE=2 SV=1 [E9Q132_MOUSE]                                                 | 48.87 | 3  | 8   | 8   | 31  | 0.667 | 0.735 | 0.785 | 0.924 | 96.20   | 48.87 | 14  | 31  | 133  | 15.3  | 10.87 |
| Q7TSG2   | RNA polymerase II subunit A C-terminal domain phosphatase OS=Mus musculus GN=Ctdp1 PE=1 SV=1 [CTDP1_MOUSE]                  | 17.81 | 3  | 12  | 12  | 38  | 1.553 | 0.882 | 1.117 | 0.924 | 123.75  | 17.81 | 18  | 38  | 960  | 104.5 | 5.39  |
| P52800   | Ephrin-B2 OS=Mus musculus GN=Efnb2 PE=1 SV=1 [EFNB2_MOUSE]                                                                  | 27.38 | 2  | 6   | 7   | 50  | 1.050 | 1.871 | 1.294 | 0.924 | 117.33  | 27.38 | 12  | 50  | 336  | 37.2  | 8.97  |
| E9Q5F9   | Protein Setd2 OS=Mus musculus GN=Setd2 PE=2 SV=1 [E9Q5F9_MOUSE]                                                             | 2.52  | 3  | 4   | 6   | 12  | 0.857 | 0.700 | 1.006 | 0.924 | 30.59   | 2.52  | 8   | 12  | 2537 | 285.5 | 6.30  |
| Q0PHV7   | Dapper homolog 3 OS=Mus musculus GN=Dact3 PE=1 SV=1 [DACT3_MOUSE]                                                           | 10.98 | 1  | 5   | 5   | 11  | 0.747 | 1.378 | 1.364 | 0.924 | 35.50   | 10.98 | 9   | 11  | 610  | 63.2  | 10.42 |
| A8YSH7   | Protein Sec14l1 OS=Mus musculus GN=Sec14l1 PE=2 SV=1 [A8YSH7_MOUSE]                                                         | 5.87  | 3  | 4   | 4   | 7   | 1.576 | 1.483 | 1.260 | 0.924 | 18.68   | 5.87  | 7   | 7   | 715  | 81.2  | 6.34  |
| G3UVV3   | MCG1556, isoform CRA_b OS=Mus musculus GN=Zfp407 PE=4 SV=1 [G3UVV3_MOUSE]                                                   | 2.54  | 1  | 2   | 2   | 2   | 2.762 | 0.519 | 1.127 | 0.924 | 2.39    | 2.54  | 2   | 2   | 2246 | 245.8 | 6.47  |
| A2AQ7    | Intron-binding protein aquarius OS=Mus musculus GN=Aqr PE=2 SV=1 [A2AQ7_MOUSE]                                              | 9.21  | 2  | 9   | 10  | 22  | 0.720 | 0.868 | 0.761 | 0.924 | 76.50   | 9.21  | 16  | 22  | 1400 | 161.8 | 7.17  |
| A2BDX0   | Activity-dependent neuroprotector homeobox protein OS=Mus musculus GN=Adnp PE=3 SV=1 [A2BDX0_MOUSE]                         | 14.89 | 2  | 14  | 14  | 43  | 0.897 | 1.066 | 0.925 | 0.924 | 114.56  | 14.89 | 23  | 43  | 1108 | 124.2 | 6.86  |
| E9QKT1   | Ubiquitin-protein ligase E3A OS=Mus musculus GN=Ube3a PE=2 SV=1 [E9QKT1_MOUSE]                                              | 35.63 | 2  | 28  | 29  | 127 | 0.876 | 1.029 | 0.863 | 0.924 | 383.37  | 35.63 | 48  | 127 | 870  | 99.8  | 5.08  |
| Q9QZD9   | Eukaryotic translation initiation factor 3 subunit I OS=Mus musculus GN=EIF3 PE=1 SV=1 [EIF3I_MOUSE]                        | 53.85 | 2  | 13  | 14  | 54  | 1.549 | 1.072 | 0.889 | 0.924 | 154.24  | 53.85 | 25  | 54  | 325  | 36.4  | 5.64  |
| E9PVM1   | Type II inositol 3,4-bisphosphate 4-phosphatase OS=Mus musculus GN=Inpp4b PE=2 SV=1 [E9PVM1_MOUSE]                          | 13.81 | 6  | 11  | 12  | 25  | 0.707 | 1.012 | 0.999 | 0.924 | 58.95   | 13.81 | 21  | 25  | 927  | 105.1 | 6.25  |
| Q99LF4   | RNA-splicing ligase RtbB homolog OS=Mus musculus GN=D10Wsu52e PE=2 SV=1 [Q99LF4_MOUSE]                                      | 58.61 | 1  | 26  | 26  | 154 | 0.819 | 0.762 | 0.842 | 0.924 | 410.49  | 58.61 | 48  | 154 | 505  | 55.2  | 7.23  |
| Q8BTF8   | RNA-binding Raly-like protein OS=Mus musculus GN=Raly PE=2 SV=1 [RALYL_MOUSE]                                               | 19.11 | 4  | 5   | 7   | 27  | 0.554 | 0.826 | 0.780 | 0.924 | 66.10   | 19.11 | 13  | 27  | 293  | 32.4  | 7.93  |
| G3X957   | Liprin-beta-2 OS=Mus musculus GN=Ppfbp2 PE=4 SV=1 [G3X957_MOUSE]                                                            | 13.49 | 5  | 5   | 7   | 19  | 1.444 | 1.710 | 1.107 | 0.924 | 27.21   | 13.49 | 10  | 19  | 882  | 98.6  | 6.27  |
| Q8CFV9   | Riboflavin kinase OS=Mus musculus GN=Rfk PE=1 SV=2 [RIFK_MOUSE]                                                             | 33.55 | 1  | 4   | 4   | 14  | 0.763 | 0.868 | 0.776 | 0.924 | 37.42   | 33.55 | 8   | 14  | 155  | 17.4  | 7.55  |
| Q9EPJ9   | ADP-ribosylation factor GTPase-activating protein 1 OS=Mus musculus GN=Arfgap1 PE=1 SV=2 [ARFG1_MOUSE]                      | 58.94 | 3  | 24  | 24  | 184 | 1.075 | 1.289 | 1.300 | 0.925 | 501.80  | 58.94 | 39  | 184 | 414  | 45.3  | 5.57  |
| Q5NCI0-2 | Isoform 2 of Up-regulator of cell proliferation OS=Mus musculus GN=Urgcp                                                    | 3.40  | 3  | 3   | 3   | 5   | 0.536 | 0.865 | 0.742 | 0.925 | 16.72   | 3.40  | 5   | 5   | 883  | 100.0 | 6.70  |
| Q79Z21   | MCG140784 OS=Mus musculus GN=Thy10 PE=2 SV=1 [Q79Z21_MOUSE]                                                                 | 4.07  | 1  | 1   | 1   | 25  | 1.407 | 1.303 | 1.002 | 0.925 | 63.17   | 4.07  | 2   | 25  | 246  | 26.2  | 5.83  |
| P35564   | Calnexin OS=Mus musculus GN=Cnx PE=1 SV=1 [CALX_MOUSE]                                                                      | 34.69 | 1  | 21  | 22  | 242 | 0.876 | 1.034 | 0.862 | 0.925 | 666.43  | 34.69 | 40  | 242 | 591  | 67.2  | 4.64  |

|          |                                                                                                           |       |   |    |    |     |       |       |       |       |        |       |    |     |      |       |       |
|----------|-----------------------------------------------------------------------------------------------------------|-------|---|----|----|-----|-------|-------|-------|-------|--------|-------|----|-----|------|-------|-------|
| Q8CG73   | Protein fantom OS=Mus musculus GN=Rpgrip1l PE=1 SV=2 - [FTM_MOUSE]                                        | 4.67  | 4 | 2  | 6  | 10  | 3.045 | 1.501 | 1.035 | 0.925 | 26.41  | 4.67  | 7  | 10  | 1264 | 144.9 | 5.43  |
| Q9DBE0   | Cysteine sulfonic acid decarboxylase OS=Mus musculus GN=Csad PE=2 SV=1 - [CSAD_MOUSE]                     | 19.88 | 2 | 8  | 10 | 25  | 1.777 | 0.872 | 0.711 | 0.925 | 61.51  | 19.88 | 17 | 25  | 493  | 55.1  | 6.61  |
| Q8BMA5   | Protein NPAT OS=Mus musculus GN=Npat PE=2 SV=2 - [NPAT_MOUSE]                                             | 2.25  | 1 | 2  | 2  | 4   | 0.949 | 1.237 | 0.930 | 0.925 | 10.21  | 2.25  | 2  | 4   | 1420 | 152.1 | 5.54  |
| P00520-2 | Isoform II of Tyrosine-protein kinase ABL1 OS=Mus musculus GN=Ab1l - [ABL1_MOUSE]                         | 14.59 | 4 | 8  | 12 | 24  | 0.809 | 0.633 | 1.185 | 0.925 | 58.84  | 14.59 | 18 | 24  | 1117 | 122.1 | 8.48  |
| P12023   | Amyloid beta A4 protein OS=Mus musculus GN=App PE=1 SV=3 - [A4_MOUSE]                                     | 32.60 | 2 | 2  | 22 | 144 | 1.647 | 0.936 | 0.928 | 0.925 | 454.01 | 32.60 | 41 | 144 | 770  | 86.7  | 4.79  |
| B1AZF9   | Apoptosis-associated tyrosine kinase OS=Mus musculus GN=Aatk PE=3 SV=1 - [B1AZF9_MOUSE]                   | 20.96 | 6 | 17 | 17 | 51  | 1.548 | 0.885 | 1.151 | 0.925 | 178.46 | 20.96 | 29 | 51  | 1317 | 139.4 | 4.55  |
| Q80UM5   | NEL-like 2 (Chicken) OS=Mus musculus GN=Nell2 PE=2 SV=1 - [Q80UM5_MOUSE]                                  | 12.70 | 2 | 11 | 11 | 24  | 1.106 | 1.192 | 1.099 | 0.925 | 63.09  | 12.70 | 17 | 24  | 819  | 91.4  | 5.82  |
| Q4VC33   | Macrophage erythroblast attacher OS=Mus musculus GN=Maea PE=1 SV=1 - [MAEA_MOUSE]                         | 20.71 | 2 | 7  | 7  | 17  | 0.986 | 1.416 | 0.807 | 0.925 | 47.79  | 20.71 | 10 | 17  | 396  | 45.3  | 8.69  |
| P06909   | Complement factor H OS=Mus musculus GN=Cfh PE=1 SV=2 - [CFAH_MOUSE]                                       | 20.75 | 4 | 17 | 20 | 59  | 3.029 | 1.508 | 0.756 | 0.925 | 174.87 | 20.75 | 35 | 59  | 1234 | 139.0 | 6.99  |
| Q3TWW8   | Protein Srsf6 OS=Mus musculus GN=Srsf6 PE=2 SV=1 - [Q3TWW8_MOUSE]                                         | 18.58 | 1 | 7  | 8  | 24  | 0.831 | 0.857 | 0.856 | 0.925 | 57.23  | 18.58 | 11 | 24  | 339  | 39.0  | 11.46 |
| Q8K0V4   | CCR4-NOT transcription complex subunit 3 OS=Mus musculus GN=Cnot3 PE=1 SV=1 - [CNOT3_MOUSE]               | 10.65 | 2 | 9  | 9  | 27  | 1.360 | 0.840 | 1.128 | 0.925 | 66.27  | 10.65 | 14 | 27  | 751  | 81.9  | 6.20  |
| Q6NX00   | Protein WWC2 OS=Mus musculus GN=Wwc2 PE=2 SV=1 - [WWC2_MOUSE]                                             | 8.59  | 1 | 9  | 9  | 16  | 1.841 | 0.907 | 0.738 | 0.925 | 39.57  | 8.59  | 13 | 16  | 1187 | 132.5 | 5.71  |
| Q9CY66-2 | Isoform 2 of H/ACA ribonucleoprotein complex subunit 1 OS=Mus musculus GN=Gar1 - [GAR1_MOUSE]             | 25.33 | 4 | 5  | 5  | 10  | 1.051 | 0.799 | 1.038 | 0.925 | 37.01  | 25.33 | 8  | 10  | 229  | 23.3  | 11.02 |
| Q9R0E1   | Procollagen-lysine,2-oxoglutarate 5-dioxygenase 3 OS=Mus musculus GN=Plod3 PE=1 SV=1 - [PLOD3_MOUSE]      | 11.61 | 1 | 7  | 7  | 15  | 1.219 | 1.020 | 0.800 | 0.925 | 42.74  | 11.61 | 10 | 15  | 741  | 84.9  | 6.23  |
| Q9CRC0   | Vitamin K epoxide reductase complex subunit 1 OS=Mus musculus GN=Vkorc1 PE=2 SV=1 - [VKOR1_MOUSE]         | 8.07  | 1 | 1  | 1  | 2   | 0.501 | 0.769 | 0.621 | 0.926 | 7.06   | 8.07  | 2  | 2   | 161  | 17.8  | 9.14  |
| F2Z497   | Protein D130043K22Rik OS=Mus musculus GN=D130043K22Rik PE=2 SV=1 - [F2Z497_MOUSE]                         | 5.37  | 2 | 3  | 3  | 6   | 1.445 | 1.307 | 0.951 | 0.926 | 21.32  | 5.37  | 5  | 6   | 782  | 84.4  | 4.77  |
| Q3UMU9-2 | Isoform 2 of Hepatomad-derived growth factor-related protein 2 OS=Mus musculus GN=Hdgfrp2 - [HDGR2_MOUSE] | 13.34 | 4 | 8  | 11 | 27  | 0.689 | 0.916 | 0.914 | 0.926 | 65.59  | 13.34 | 19 | 27  | 667  | 74.0  | 8.54  |
| Q9Z0M5   | Lysosomal acid lipase/cholesterlyl ester hydrolase OS=Mus musculus GN=Lipa PE=2 SV=2 - [LIPH_MOUSE]       | 4.03  | 1 | 1  | 1  | 1   | 1.355 | 0.951 | 1.256 | 0.926 | 0.00   | 4.03  | 1  | 1   | 397  | 45.3  | 8.07  |
| P97793   | ALK tyrosine kinase receptor OS=Mus musculus GN=Alk PE=1 SV=2 - [ALK_MOUSE]                               | 13.82 | 1 | 15 | 16 | 33  | 0.865 | 0.874 | 0.904 | 0.926 | 107.78 | 13.82 | 25 | 33  | 1621 | 174.8 | 6.93  |
| Q9JKN1   | Zinc transporter 7 OS=Mus musculus GN=Slc30a7 PE=1 SV=1 - [ZNT7_MOUSE]                                    | 3.97  | 1 | 1  | 1  | 8   | 0.914 | 0.868 | 0.830 | 0.926 | 17.02  | 3.97  | 2  | 8   | 378  | 41.8  | 6.84  |
| Q9D4H4-2 | Isoform 2 of Angiomotin-like protein 1 OS=Mus musculus GN=Amot1 - [AMOL1_MOUSE]                           | 10.43 | 2 | 7  | 10 | 29  | 1.067 | 0.671 | 1.018 | 0.926 | 72.45  | 10.43 | 18 | 29  | 882  | 98.4  | 7.37  |
| Q6PSH2   | Nestin OS=Mus musculus GN=Nes PE=1 SV=1 - [NEST_MOUSE]                                                    | 16.85 | 2 | 22 | 23 | 46  | 1.614 | 1.106 | 0.887 | 0.926 | 125.04 | 16.85 | 34 | 46  | 1864 | 207.0 | 4.34  |
| Q9D662   | Protein transport protein Sec23B OS=Mus musculus GN=Sec23b PE=2 SV=1 - [SC23B_MOUSE]                      | 16.04 | 2 | 7  | 11 | 43  | 0.800 | 0.777 | 0.841 | 0.926 | 148.56 | 16.04 | 20 | 43  | 767  | 86.4  | 6.96  |
| B1AWP0   | Protein Phactr2 OS=Mus musculus GN=Phactr2 PE=2 SV=1 - [B1AWP0_MOUSE]                                     | 10.76 | 5 | 6  | 8  | 18  | 0.859 | 1.134 | 1.587 | 0.926 | 42.24  | 10.76 | 12 | 18  | 632  | 69.2  | 7.18  |
| Q8BRE0   | Protein RD3 OS=Mus musculus GN=Rd3 PE=2 SV=1 - [RD3_MOUSE]                                                | 12.82 | 3 | 1  | 2  | 3   | 1.025 | 1.110 | 1.077 | 0.926 | 4.58   | 12.82 | 2  | 3   | 195  | 22.7  | 8.66  |
| Q8CH18-3 | Isoform 3 of Cell division cycle and apoptosis regulator protein 1 OS=Mus musculus GN=Ccr1 - [CCR1_MOUSE] | 16.24 | 4 | 15 | 16 | 60  | 0.971 | 0.926 | 0.925 | 0.926 | 131.91 | 16.24 | 27 | 60  | 1084 | 124.7 | 6.02  |

|          |                                                                                                               |       |   |    |    |     |        |       |       |       |         |       |    |     |      |       |       |
|----------|---------------------------------------------------------------------------------------------------------------|-------|---|----|----|-----|--------|-------|-------|-------|---------|-------|----|-----|------|-------|-------|
| Q9QYH6   | Melanoma-associated antigen D1 OS=Mus musculus GN=Maged1 PE=1 SV=1 -                                          | 19.23 | 1 | 8  | 10 | 59  | 1.467  | 0.821 | 0.984 | 0.926 | 164.76  | 19.23 | 15 | 59  | 775  | 85.6  | 7.50  |
| E9Q084   | TATA-box-binding protein (Fragment) OS=Mus musculus GN=Tbp PE=2 SV=1 - [E9Q084_MOUSE]                         | 3.89  | 5 | 1  | 1  | 2   | 0.779  | 0.924 | 0.793 | 0.926 | 2.22    | 3.89  | 1  | 2   | 180  | 19.4  | 8.19  |
| Q3UH93   | Plexin-D1 OS=Mus musculus GN=Plxd1 PE=1 SV=1 - [PLXD1_MOUSE]                                                  | 15.01 | 2 | 19 | 21 | 57  | 1.008  | 2.672 | 1.558 | 0.926 | 186.80  | 15.01 | 36 | 57  | 1925 | 211.5 | 7.11  |
| Q9D6S7   | Ribosome-recycling factor, mitochondrial OS=Mus musculus GN=Mrrf PE=1 SV=1 - [RRFM_MOUSE]                     | 35.11 | 1 | 6  | 6  | 40  | 1.111  | 0.493 | 1.271 | 0.926 | 141.38  | 35.11 | 12 | 40  | 262  | 29.0  | 9.85  |
| Q6PFR5   | Transformer-2 protein homolog alpha OS=Mus musculus GN=Tra2a PE=1 SV=1 - [TRA2A_MOUSE]                        | 34.88 | 2 | 6  | 7  | 20  | 0.650  | 0.977 | 0.867 | 0.926 | 62.21   | 34.88 | 11 | 20  | 281  | 32.3  | 11.28 |
| Q60605   | Myosin light polypeptide 6 OS=Mus musculus GN=Myh6 PE=1 SV=3 - [MYL6_MOUSE]                                   | 80.13 | 1 | 1  | 10 | 146 | 2.194  | 1.095 | 1.012 | 0.926 | 396.80  | 80.13 | 18 | 146 | 151  | 16.9  | 4.65  |
| P21550   | Beta-enolase OS=Mus musculus GN=Eno3 PE=1 SV=3 - [ENOB_MOUSE]                                                 | 54.61 | 9 | 9  | 21 | 615 | 1.626  | 2.215 | 0.906 | 0.926 | 2158.84 | 54.61 | 37 | 615 | 434  | 47.0  | 7.18  |
| Q5SQY2   | Biorientation of chromosomes in cell division protein 1 OS=Mus musculus GN=Bod1 PE=2 SV=1 - [BOD1_MOUSE]      | 44.51 | 1 | 5  | 7  | 16  | 1.414  | 1.419 | 1.018 | 0.926 | 47.92   | 44.51 | 12 | 16  | 173  | 18.4  | 5.90  |
| P62862   | 40S ribosomal protein S30 OS=Mus musculus GN=Fau PE=2 SV=1 - [RS30_MOUSE]                                     | 16.95 | 2 | 1  | 1  | 4   | 1.233  | 1.201 | 0.965 | 0.927 | 9.17    | 16.95 | 2  | 4   | 59   | 6.6   | 12.15 |
| F7D291   | MTSS1-like protein (Fragment) OS=Mus musculus GN=Mtss1 PE=4 SV=1 - [F7D291_MOUSE]                             | 34.34 | 2 | 4  | 10 | 35  | 0.689  | 0.818 | 0.942 | 0.927 | 121.57  | 34.34 | 18 | 35  | 364  | 39.1  | 8.00  |
| G3X952   | MCG20985, isoform CRA_a OS=Mus musculus GN=Zkscan2 PE=4 SV=1 - [G3X952_MOUSE]                                 | 2.08  | 1 | 1  | 1  | 2   | 2.036  | 1.395 | 0.802 | 0.927 | 3.77    | 2.08  | 1  | 2   | 960  | 110.4 | 7.85  |
| Q8K1A6   | Coiled-coil and C2 domain-containing protein 1A OS=Mus musculus GN=Cc2d1a PE=1 SV=2 - [C2D1A_MOUSE]           | 36.90 | 1 | 4  | 32 | 95  | 1.413  | 1.048 | 1.100 | 0.927 | 269.56  | 36.90 | 56 | 95  | 943  | 103.6 | 7.84  |
| E9Q7P2   | Protein Cacna1i OS=Mus musculus GN=Cacna1i PE=2 SV=1 - [E9Q7P2_MOUSE]                                         | 3.59  | 3 | 3  | 5  | 7   | 4.596  | 1.613 | 1.254 | 0.927 | 10.81   | 3.59  | 6  | 7   | 2199 | 242.7 | 6.47  |
| Q9D1X9   | Transmembrane protein 50B OS=Mus musculus GN=Tmem50b PE=2 SV=1 - [TMS0B_MOUSE]                                | 14.56 | 3 | 2  | 2  | 4   | 1.174  | 0.960 | 0.937 | 0.927 | 10.78   | 14.56 | 3  | 4   | 158  | 17.9  | 5.39  |
| D3Z3N8   | G1/S-specific cyclin-E1 (Fragment) OS=Mus musculus GN=Ccne1 PE=2 SV=1 - [D3Z3N8_MOUSE]                        | 9.58  | 2 | 1  | 1  | 1   | 15.167 | 3.563 | 3.876 | 0.927 | 0.00    | 9.58  | 1  | 1   | 167  | 19.7  | 6.23  |
| Q9EPUS   | Tumor necrosis factor receptor superfamily member 21 OS=Mus musculus GN=Tnfrsf21 PE=1 SV=2 - [TNFRSF21_MOUSE] | 16.34 | 1 | 9  | 9  | 20  | 0.994  | 0.793 | 0.903 | 0.927 | 55.23   | 16.34 | 17 | 20  | 655  | 71.9  | 7.46  |
| Q9CQF7   | Prefoldin 1 OS=Mus musculus GN=Pfdn1 PE=2 SV=1 - [Q9CQF7_MOUSE]                                               | 60.66 | 2 | 8  | 8  | 61  | 1.608  | 1.024 | 1.154 | 0.927 | 131.75  | 60.66 | 14 | 61  | 122  | 14.2  | 6.81  |
| Q6IMB2   | ADP-ribosylation factor-like 9 OS=Mus musculus GN=Arf9 PE=2 SV=1 - [Q6IMB2_MOUSE]                             | 10.53 | 2 | 1  | 1  | 1   | 1.174  | 1.249 | 0.820 | 0.927 | 2.33    | 10.53 | 1  | 1   | 133  | 15.1  | 8.19  |
| P15066   | Transcription factor jun-D OS=Mus musculus GN=Jund PE=1 SV=1 - [JUND_MOUSE]                                   | 16.42 | 2 | 4  | 5  | 12  | 1.136  | 1.180 | 1.177 | 0.927 | 40.46   | 16.42 | 7  | 12  | 341  | 34.9  | 7.44  |
| F6TKE8   | Ly6/PLAUR domain-containing protein 1 (Fragment) OS=Mus musculus GN=Lypd1 PE=4 SV=1 - [F6TKE8_MOUSE]          | 14.63 | 4 | 1  | 1  | 15  | 1.188  | 2.475 | 0.993 | 0.927 | 51.10   | 14.63 | 2  | 15  | 82   | 9.1   | 4.88  |
| Q9JM52-3 | Isoform 3 of Misshapen-like kinase 1 OS=Mus musculus GN=Mink1 - [MINK1_MOUSE]                                 | 35.24 | 7 | 1  | 37 | 123 | 1.848  | 2.079 | 0.800 | 0.927 | 353.12  | 35.24 | 60 | 123 | 1345 | 151.2 | 7.96  |
| P59325   | Eukaryotic translation initiation factor 5 OS=Mus musculus GN=EIF5 PE=1 SV=1 - [IF5_MOUSE]                    | 35.90 | 2 | 15 | 16 | 80  | 0.930  | 0.648 | 0.908 | 0.927 | 243.03  | 35.90 | 30 | 80  | 429  | 48.9  | 5.52  |
| K4D165   | Cold inducible RNA binding protein, isoform CRA_a OS=Mus musculus GN=Cirbp PE=4 SV=1 - [K4D165_MOUSE]         | 45.24 | 3 | 6  | 6  | 48  | 1.496  | 0.763 | 1.281 | 0.927 | 140.75  | 45.24 | 11 | 48  | 168  | 18.1  | 9.73  |
| Q8R349   | Cell division cycle protein 16 homolog OS=Mus musculus GN=Cdc16 PE=2 SV=1 - [CDC16_MOUSE]                     | 15.16 | 1 | 8  | 8  | 30  | 0.661  | 0.986 | 0.739 | 0.927 | 86.49   | 15.16 | 13 | 30  | 620  | 71.4  | 5.76  |
| Q9EPU0-2 | Isoform 2 of Regulator of nonsense transcripts 1 OS=Mus musculus GN=Upf1 -                                    | 40.88 | 2 | 35 | 35 | 104 | 0.788  | 0.965 | 0.866 | 0.927 | 296.53  | 40.88 | 58 | 104 | 1113 | 122.6 | 6.68  |

|          |                                                                                                                               |       |   |    |    |     |       |       |       |       |         |       |    |     |      |       |      |
|----------|-------------------------------------------------------------------------------------------------------------------------------|-------|---|----|----|-----|-------|-------|-------|-------|---------|-------|----|-----|------|-------|------|
| Q69ZK0   | Phosphatidylinositol 3,4,5-trisphosphate-dependent Rac exchanger 1 protein OS=Mus musculus GN=Prex1 PE=1 SV=2 - [PREX1_MOUSE] | 20.79 | 5 | 32 | 33 | 73  | 0.626 | 0.921 | 0.891 | 0.927 | 202.15  | 20.79 | 54 | 73  | 1650 | 184.8 | 6.29 |
| Q8BMK5-2 | Isoform 2 of Uncharacterized protein C12orf68 homolog OS=Mus musculus -                                                       | 32.89 | 2 | 3  | 4  | 16  | 1.483 | 0.837 | 1.003 | 0.927 | 52.65   | 32.89 | 7  | 16  | 152  | 16.2  | 4.27 |
| Q3U2G2   | Heat shock 70 kDa protein 4 OS=Mus musculus GN=Hspa4 PE=2 SV=1 - [Q3U2G2_MOUSE]                                               | 59.14 | 1 | 3  | 51 | 417 | 0.881 | 1.037 | 1.132 | 0.927 | 1224.79 | 59.14 | 95 | 417 | 842  | 94.1  | 5.21 |
| B1ATZ0   | Hepatocyte growth factor-regulated tyrosine kinase substrate OS=Mus musculus GN=Hgs PE=2 SV=1 - [B1ATZ0_MOUSE]                | 26.50 | 6 | 18 | 19 | 88  | 1.123 | 1.033 | 1.027 | 0.927 | 216.85  | 26.50 | 36 | 88  | 766  | 85.7  | 7.47 |
| Q8C0W0   | Protein Tmsb15b2 OS=Mus musculus GN=Tmsb15l PE=2 SV=1 - [Q8C0W0_MOUSE]                                                        | 75.00 | 2 | 1  | 4  | 23  | 1.762 | 1.007 | 1.480 | 0.928 | 39.34   | 75.00 | 8  | 23  | 80   | 9.2   | 6.13 |
| Q9EPK6   | Nucleotide exchange factor SILL1 OS=Mus musculus GN=Sill1 PE=1 SV=2 - [SILL1_MOUSE]                                           | 11.61 | 1 | 4  | 5  | 13  | 1.352 | 1.188 | 0.973 | 0.928 | 28.89   | 11.61 | 9  | 13  | 465  | 52.4  | 5.27 |
| Q6KAS7-2 | Isoform 2 of Zinc finger protein 521 OS=Mus musculus GN=Znf521 - [ZNF521_MOUSE]                                               | 4.05  | 2 | 4  | 4  | 4   | 1.105 | 1.416 | 0.837 | 0.928 | 7.38    | 4.05  | 4  | 4   | 1310 | 147.4 | 7.01 |
| Q9DB52   | Protein FAM122A OS=Mus musculus GN=Fam122a PE=1 SV=1 - [F122A_MOUSE]                                                          | 38.38 | 1 | 6  | 6  | 19  | 2.029 | 0.917 | 1.117 | 0.928 | 79.60   | 38.38 | 9  | 19  | 284  | 30.3  | 6.79 |
| Q8BM92   | Cadherin-7 OS=Mus musculus GN=Cdh7 PE=2 SV=1 - [CADH7_MOUSE]                                                                  | 15.03 | 2 | 9  | 9  | 17  | 1.127 | 0.854 | 0.916 | 0.928 | 45.71   | 15.03 | 11 | 17  | 785  | 87.1  | 4.82 |
| P63073   | Eukaryotic translation initiation factor 4E OS=Mus musculus GN=Eif4e PE=1 SV=1 - [IF4E_MOUSE]                                 | 31.34 | 3 | 6  | 7  | 30  | 1.026 | 1.040 | 0.895 | 0.928 | 98.33   | 31.34 | 12 | 30  | 217  | 25.0  | 6.15 |
| Q91269   | SLIT-ROBO Rho GTPase-activating protein 1 OS=Mus musculus GN=Srgap1 PE=1 SV=2 - [SRGP1_MOUSE]                                 | 25.42 | 3 | 15 | 24 | 59  | 1.095 | 0.692 | 0.802 | 0.928 | 161.41  | 25.42 | 39 | 59  | 1062 | 121.4 | 6.74 |
| Q9CQ45   | Neudessin OS=Mus musculus GN=Nenf PE=1 SV=1 - [NENF_MOUSE]                                                                    | 63.16 | 1 | 8  | 8  | 49  | 1.988 | 1.184 | 1.146 | 0.928 | 145.60  | 63.16 | 14 | 49  | 171  | 18.9  | 5.27 |
| Q14B46-2 | Isoform 2 of Rhotekin-2 OS=Mus musculus GN=Rtkn2 - [RTKN2_MOUSE]                                                              | 2.00  | 3 | 1  | 1  | 1   | 0.902 | 1.036 | 0.905 | 0.928 | 2.13    | 2.00  | 1  | 1   | 601  | 66.6  | 8.07 |
| P62484   | Abi interactor 2 OS=Mus musculus GN=Abi2 PE=1 SV=1 - [ABI2_MOUSE]                                                             | 35.20 | 1 | 9  | 12 | 72  | 0.985 | 1.339 | 1.283 | 0.928 | 173.88  | 35.20 | 22 | 72  | 446  | 49.4  | 6.01 |
| Q8QZY1   | Eukaryotic translation initiation factor 3 subunit L OS=Mus musculus GN=Eif3l PE=1 SV=1 - [EIF3L_MOUSE]                       | 35.28 | 1 | 18 | 18 | 77  | 0.676 | 0.986 | 0.773 | 0.928 | 221.03  | 35.28 | 31 | 77  | 564  | 66.6  | 6.44 |
| Q03958   | Prefoldin subunit 6 OS=Mus musculus GN=Pfdn6 PE=2 SV=1 - [PFD6_MOUSE]                                                         | 55.91 | 1 | 2  | 9  | 55  | 1.290 | 1.045 | 1.201 | 0.928 | 145.38  | 55.91 | 18 | 55  | 127  | 14.4  | 8.88 |
| Q9ERV1   | Probable E3 ubiquitin-protein ligase makorin-2 OS=Mus musculus GN=Mkn2 PE=2 SV=2 - [MKRN2_MOUSE]                              | 29.57 | 1 | 11 | 11 | 19  | 1.469 | 0.726 | 1.053 | 0.928 | 44.27   | 29.57 | 16 | 19  | 416  | 46.6  | 7.34 |
| E9Q7N5   | Ribosome-releasing factor 2, mitochondrial OS=Mus musculus GN=Gfm2 PE=2 SV=1 - [E9Q7N5_MOUSE]                                 | 20.78 | 6 | 15 | 15 | 34  | 0.620 | 0.750 | 0.738 | 0.928 | 88.55   | 20.78 | 25 | 34  | 741  | 82.0  | 6.32 |
| H7BX22   | Ran-specific GTPase-activating protein OS=Mus musculus GN=Ranbp1 PE=2 SV=1 - [H7BX22_MOUSE]                                   | 31.37 | 2 | 4  | 4  | 61  | 1.839 | 0.943 | 1.280 | 0.928 | 157.01  | 31.37 | 7  | 61  | 153  | 17.9  | 8.24 |
| P39087   | Glutamate receptor ionotropic, kainate 2 OS=Mus musculus GN=Grik2 PE=1 SV=4 - [GRIK2_MOUSE]                                   | 19.27 | 4 | 14 | 16 | 34  | 0.716 | 1.185 | 0.978 | 0.928 | 106.75  | 19.27 | 23 | 34  | 908  | 102.4 | 7.77 |
| Q9CWL8   | Beta-catenin-like protein 1 OS=Mus musculus GN=Ctnnb1 PE=1 SV=1 - [CTNBL1_MOUSE]                                              | 13.85 | 1 | 8  | 8  | 10  | 0.688 | 0.990 | 0.757 | 0.928 | 23.46   | 13.85 | 9  | 10  | 563  | 64.9  | 5.07 |
| A2AMW0   | Capping protein (Actin filament) muscle Z-line, beta, isoform CRA_a OS=Mus musculus GN=Capzb PE=4 SV=1 - [CAPZB_MOUSE]        | 62.69 | 6 | 3  | 20 | 292 | 0.842 | 1.382 | 1.131 | 0.928 | 722.71  | 62.69 | 34 | 292 | 260  | 29.3  | 6.92 |
| Q4KL52   | Zfyve19 protein OS=Mus musculus GN=Zfyve19 PE=2 SV=1 - [Q4KL52_MOUSE]                                                         | 32.73 | 2 | 8  | 8  | 29  | 1.833 | 0.964 | 1.305 | 0.929 | 83.73   | 32.73 | 14 | 29  | 330  | 36.3  | 7.81 |
| Q00897   | Alpha-1-antitrypsin 1-4 OS=Mus musculus GN=Serpina1d PE=2 SV=1 - [A1AT4_MOUSE]                                                | 49.64 | 1 | 5  | 18 | 128 | 2.649 | 1.546 | 1.023 | 0.929 | 346.72  | 49.64 | 33 | 128 | 413  | 46.0  | 5.44 |

|          |                                                                                                                       |       |   |     |     |     |        |       |       |       |         |       |     |     |      |       |      |
|----------|-----------------------------------------------------------------------------------------------------------------------|-------|---|-----|-----|-----|--------|-------|-------|-------|---------|-------|-----|-----|------|-------|------|
| Q62120   | Tyrosine-protein kinase JAK2 OS=Mus musculus GN=Jak2 PE=1 SV=2 - [JAK2_MOUSE]                                         | 4.52  | 3 | 3   | 5   | 11  | 0.501  | 1.048 | 0.793 | 0.929 | 27.50   | 4.52  | 7   | 11  | 1129 | 130.2 | 7.52 |
| Q8C5W3   | Tubulin-specific chaperone cofactor E-like protein OS=Mus musculus GN=Tbccl PE=1 SV=1 - [TBCEL_MOUSE]                 | 54.48 | 3 | 18  | 18  | 53  | 1.386  | 0.955 | 0.873 | 0.929 | 137.46  | 54.48 | 34  | 53  | 424  | 48.0  | 5.53 |
| P62869   | Transcription elongation factor B polypeptide 2 OS=Mus musculus GN=Tceb2 PE=1 SV=1 - [ELOB_MOUSE]                     | 84.75 | 1 | 8   | 8   | 25  | 1.164  | 0.986 | 1.028 | 0.929 | 67.27   | 84.75 | 12  | 25  | 118  | 13.2  | 5.01 |
| Q9QYX7   | Protein piccolo OS=Mus musculus GN=Pclo PE=1 SV=4 - [PCLO_MOUSE]                                                      | 41.20 | 3 | 157 | 161 | 886 | 0.924  | 1.013 | 1.691 | 0.929 | 2412.24 | 41.20 | 276 | 886 | 5068 | 550.5 | 6.51 |
| Q02248   | Catenin beta-1 OS=Mus musculus GN=Ctnnb1 PE=1 SV=1 - [CTNBI_MOUSE]                                                    | 54.29 | 8 | 30  | 35  | 210 | 0.695  | 1.141 | 0.973 | 0.929 | 605.06  | 54.29 | 64  | 210 | 781  | 85.4  | 5.86 |
| Q3U319   | E3 ubiquitin-protein ligase BRE1B OS=Mus musculus GN=Rnf40 PE=2 SV=2 - [BRE1B_MOUSE]                                  | 24.58 | 4 | 18  | 19  | 48  | 1.201  | 0.792 | 0.943 | 0.929 | 145.29  | 24.58 | 30  | 48  | 1001 | 113.9 | 6.48 |
| E9Q813   | Ras-GEF domain-containing family member 1B OS=Mus musculus GN=Rasgef1b PE=2 SV=1 - [E9Q813_MOUSE]                     | 1.86  | 3 | 1   | 1   | 1   | 0.355  | 0.592 | 0.841 | 0.929 | 0.00    | 1.86  | 1   | 1   | 431  | 50.3  | 8.06 |
| Q6TXD4   | Dynamamin-binding protein OS=Mus musculus GN=Dnmbp PE=1 SV=2 - [DNMBP_MOUSE]                                          | 3.10  | 2 | 3   | 3   | 3   | 0.441  | 0.899 | 1.023 | 0.929 | 5.66    | 3.10  | 3   | 3   | 1580 | 177.2 | 5.41 |
| Q9DCJ1   | Target of rapamycin complex subunit LST8 OS=Mus musculus GN=Mlst8 PE=1 SV=1 - [LST8_MOUSE]                            | 27.61 | 1 | 7   | 7   | 17  | 1.768  | 1.006 | 0.956 | 0.929 | 58.80   | 27.61 | 12  | 17  | 326  | 35.8  | 5.86 |
| Q921S7   | 39S ribosomal protein L37, mitochondrial OS=Mus musculus GN=Mrp37 PE=2 SV=1 - [RM37_MOUSE]                            | 32.62 | 1 | 13  | 13  | 46  | 0.997  | 0.787 | 0.866 | 0.929 | 152.79  | 32.62 | 23  | 46  | 423  | 48.3  | 8.84 |
| Q9R062   | Glycogenin-1 OS=Mus musculus GN=Gyg1 PE=2 SV=3 - [GLYG_MOUSE]                                                         | 16.82 | 3 | 5   | 5   | 24  | 1.349  | 0.670 | 0.740 | 0.929 | 83.47   | 16.82 | 7   | 24  | 333  | 37.4  | 5.29 |
| Q80W54   | CAAX prenyl protease 1 homolog OS=Mus musculus GN=Zmpste24 PE=1 SV=2 -                                                | 15.79 | 2 | 6   | 6   | 18  | 0.776  | 0.910 | 0.765 | 0.929 | 45.89   | 15.79 | 10  | 18  | 475  | 54.7  | 6.95 |
| Q9Z2W1   | Serine/threonine-protein kinase 25 OS=Mus musculus GN=Sk25 PE=1 SV=2 - [STK25_MOUSE]                                  | 21.60 | 2 | 5   | 9   | 18  | 0.419  | 1.115 | 0.902 | 0.929 | 50.53   | 21.60 | 13  | 18  | 426  | 48.1  | 6.81 |
| E9PVC5   | Eukaryotic translation initiation factor 4 gamma 1 OS=Mus musculus GN=Eif4g1 PE=2 SV=1 - [E9PVC5_MOUSE]               | 31.37 | 6 | 1   | 44  | 188 | 0.695  | 0.556 | 0.754 | 0.929 | 476.27  | 31.37 | 74  | 188 | 1594 | 175.4 | 5.38 |
| Q8C5X1   | Protein 4931406P16Rik OS=Mus musculus GN=4931406P16Rik PE=2 SV=1 - [Q8C5X1_MOUSE]                                     | 4.72  | 1 | 2   | 2   | 3   | 1.546  | 0.356 | 0.774 | 0.929 | 8.07    | 4.72  | 3   | 3   | 1059 | 115.5 | 7.24 |
| Q99ME6-2 | Isoform B of Protein ATP1B4 OS=Mus musculus GN=Atp1b4 - [AT1B4_MOUSE]                                                 | 1.99  | 2 | 1   | 1   | 1   | 2.037  | 1.658 | 1.440 | 0.929 | 0.00    | 1.99  | 1   | 1   | 352  | 40.9  | 4.78 |
| Q6PSF7   | Protein tweety homolog 3 OS=Mus musculus GN=Ttyh3 PE=1 SV=1 - [TTYH3_MOUSE]                                           | 14.89 | 2 | 6   | 6   | 32  | 0.612  | 1.252 | 1.078 | 0.929 | 91.15   | 14.89 | 10  | 32  | 524  | 57.7  | 5.85 |
| Q9ER72   | Cysteine-tRNA ligase, cytoplasmic OS=Mus musculus GN=Cars PE=1 SV=2 - [SYCC_MOUSE]                                    | 39.59 | 2 | 32  | 32  | 106 | 0.765  | 0.670 | 0.737 | 0.929 | 295.31  | 39.59 | 56  | 106 | 831  | 94.8  | 6.76 |
| A9C437   | Chloride channel protein 2 OS=Mus musculus GN=Cln2 PE=2 SV=1 - [A9C437_MOUSE]                                         | 6.40  | 3 | 4   | 4   | 8   | 14.813 | 2.293 | 0.526 | 0.930 | 25.14   | 6.40  | 6   | 8   | 891  | 97.6  | 8.56 |
| Q8C0D5   | Elongation factor Tu GTP-binding domain-containing protein 1 OS=Mus musculus GN=Eftud1 PE=2 SV=1 - [EFTUD1_MOUSE]     | 21.03 | 2 | 21  | 22  | 41  | 0.755  | 0.866 | 0.871 | 0.930 | 112.92  | 21.03 | 33  | 41  | 1127 | 125.7 | 6.16 |
| P59759   | Myocardial myosin-like protein 2 OS=Mus musculus GN=Mkl2 PE=1 SV=1 - [MKL2_MOUSE]                                     | 32.96 | 2 | 1   | 25  | 102 | 1.087  | 1.479 | 1.696 | 0.930 | 267.66  | 32.96 | 41  | 102 | 1080 | 117.5 | 6.16 |
| Q62426   | Cystatin-B OS=Mus musculus GN=Cstb PE=1 SV=1 - [CYTB_MOUSE]                                                           | 47.96 | 1 | 3   | 4   | 21  | 1.363  | 0.792 | 0.960 | 0.930 | 54.17   | 47.96 | 7   | 21  | 98   | 11.0  | 7.39 |
| O35286   | Putative pre-mRNA-splicing factor ATP-dependent RNA helicase DHX15 OS=Mus musculus GN=Dhx15 PE=2 SV=2 - [DHX15_MOUSE] | 32.33 | 1 | 21  | 22  | 88  | 0.552  | 0.675 | 0.824 | 0.930 | 245.89  | 32.33 | 35  | 88  | 795  | 90.9  | 7.46 |
| P14069   | Protein S100-A6 OS=Mus musculus GN=S100a6 PE=1 SV=3 - [S10A6_MOUSE]                                                   | 47.19 | 1 | 4   | 4   | 12  | 2.621  | 1.704 | 0.517 | 0.930 | 28.16   | 47.19 | 6   | 12  | 89   | 10.0  | 5.48 |
| Q0P5V9-3 | Isoform 3 of Solute carrier family 45 member 4 OS=Mus musculus GN=Slc45a4 -                                           | 5.92  | 4 | 2   | 2   | 2   | 0.516  | 0.491 | 0.979 | 0.930 | 3.56    | 5.92  | 2   | 2   | 591  | 64.6  | 6.25 |

|          |                                                                                                         |       |   |    |    |     |       |       |       |       |        |       |     |     |      |       |       |
|----------|---------------------------------------------------------------------------------------------------------|-------|---|----|----|-----|-------|-------|-------|-------|--------|-------|-----|-----|------|-------|-------|
| Q5SWZ5   | Myosin phosphatase Rho-interacting protein<br>OS=Mus musculus<br>GN=Mrip PE=2 SV=1 - [Q5SWZ5_MOUSE]     | 35.79 | 3 | 26 | 61 | 168 | 0.993 | 0.956 | 1.332 | 0.930 | 488.46 | 35.79 | 102 | 168 | 2269 | 257.1 | 5.59  |
| Q9QYM9   | Tomoregulin-2 OS=Mus musculus GN=Tmeff2 PE=2 SV=1 - [TEFF2_MOUSE]                                       | 12.03 | 2 | 5  | 5  | 13  | 0.907 | 1.278 | 1.029 | 0.930 | 23.48  | 12.03 | 8   | 13  | 374  | 41.4  | 5.15  |
| H3BKM2   | Nuclear-interacting partner of ALK OS=Mus musculus GN=Zc3hc1 PE=2 SV=1 - [H3BKM2_MOUSE]                 | 13.29 | 6 | 4  | 4  | 11  | 0.968 | 1.165 | 1.007 | 0.930 | 37.70  | 13.29 | 7   | 11  | 459  | 50.5  | 5.50  |
| Q61584   | Fragile X mental retardation syndrome-related protein 1 OS=Mus musculus GN=Fx1 PE=1 SV=2 - [FXR1_MOUSE] | 33.97 | 7 | 14 | 18 | 83  | 0.866 | 0.589 | 0.779 | 0.930 | 277.50 | 33.97 | 33  | 83  | 677  | 76.2  | 6.98  |
| Q91WE6-3 | Isoform 3 of Threonylcarbamoyladenosi ne tRNA methyltransferase OS=Mus musculus GN=Cdkal1 [CDKAL_MOUSE] | 7.41  | 4 | 2  | 2  | 4   | 0.789 | 0.859 | 0.737 | 0.930 | 11.07  | 7.41  | 4   | 4   | 351  | 39.7  | 7.40  |
| D3YV6    | Protein Hs3t4 OS=Mus musculus GN=Hs3t4 PE=4 SV=1 - [D3YV6_MOUSE]                                        | 1.78  | 1 | 1  | 1  | 1   | 0.975 | 1.401 | 1.416 | 0.930 | 0.00   | 1.78  | 1   | 1   | 449  | 49.1  | 9.23  |
| Q61475   | Complement decay-accelerating factor, GPI-anchored OS=Mus musculus GN=Cd55 PE=2 SV=2 - [DAF1_MOUSE]     | 5.13  | 1 | 2  | 2  | 3   | 0.989 | 0.946 | 0.820 | 0.930 | 6.12   | 5.13  | 3   | 3   | 390  | 42.6  | 8.40  |
| D3Z4L8   | Protein It271 (Fragment) OS=Mus musculus GN=It271 PE=2 SV=1 - [D3Z4L8_MOUSE]                            | 13.33 | 6 | 1  | 1  | 1   | 1.082 | 1.062 | 1.231 | 0.930 | 3.24   | 13.33 | 1   | 1   | 105  | 10.3  | 11.19 |
| D3Z3R1   | 60S ribosomal protein L36 OS=Mus musculus GN=Gm5745 PE=3 SV=1 - [D3Z3R1_MOUSE]                          | 35.58 | 5 | 4  | 5  | 43  | 0.702 | 0.824 | 0.802 | 0.930 | 120.34 | 35.58 | 10  | 43  | 104  | 12.1  | 11.36 |
| E9PUQ8   | Protein Dgkd OS=Mus musculus GN=Dgkd PE=2 SV=1 - [E9PUQ8_MOUSE]                                         | 12.95 | 6 | 11 | 15 | 47  | 0.595 | 1.087 | 1.360 | 0.931 | 155.45 | 12.95 | 23  | 47  | 1220 | 135.1 | 7.81  |
| Q69Z8    | Actin-binding LIM protein 3 OS=Mus musculus GN=Abllm3 PE=1 SV=2 - [ABLIM3_MOUSE]                        | 22.14 | 1 | 11 | 12 | 50  | 1.182 | 0.892 | 1.219 | 0.931 | 114.12 | 22.14 | 23  | 50  | 682  | 77.6  | 8.54  |
| Q8C0V7   | Sperm motility kinase W OS=Mus musculus GN=Gn4776 PE=2 SV=2 - [SMKW_MOUSE]                              | 2.40  | 1 | 1  | 1  | 1   | 2.001 | 1.706 | 0.816 | 0.931 | 3.67   | 2.40  | 1   | 1   | 499  | 55.4  | 8.68  |
| AZAHG0   | Leucine zipper putative tumor suppressor 3 OS=Mus musculus GN=Lzts3 PE=2 SV=1 - [LZTS3_MOUSE]           | 42.14 | 4 | 20 | 21 | 81  | 1.439 | 1.395 | 2.180 | 0.931 | 253.64 | 42.14 | 33  | 81  | 700  | 74.9  | 6.99  |
| Q91YN9   | BAG family molecular chaperone regulator 2 OS=Mus musculus GN=Bag2 PE=1 SV=1 - [BAG2_MOUSE]             | 32.86 | 1 | 7  | 8  | 22  | 1.187 | 1.089 | 0.807 | 0.931 | 56.71  | 32.86 | 14  | 22  | 210  | 23.5  | 6.42  |
| Q9CR20   | Immediate early response 3-interacting protein 1 OS=Mus musculus GN=Ier3ip1 PE=2 SV=1 - [IR3IP_MOUSE]   | 24.39 | 2 | 1  | 1  | 6   | 1.113 | 1.133 | 0.905 | 0.931 | 22.07  | 24.39 | 2   | 6   | 82   | 9.0   | 8.22  |
| P3415Z-3 | Isoform 3 of Focal adhesion kinase 1 OS=Mus musculus GN=Ptk2 - [FAK1_MOUSE]                             | 33.65 | 9 | 29 | 31 | 90  | 0.871 | 1.267 | 1.129 | 0.931 | 246.11 | 33.65 | 46  | 90  | 1052 | 119.2 | 6.62  |
| Q8VH51-2 | Isoform 2 of RNA-binding protein 39 OS=Mus musculus GN=Rbm39 - [RBM39_MOUSE]                            | 44.66 | 7 | 17 | 17 | 42  | 0.723 | 0.886 | 0.885 | 0.931 | 120.58 | 44.66 | 28  | 42  | 524  | 58.6  | 10.13 |
| P46471   | 26S protease regulatory subunit 7 OS=Mus musculus GN=Psmc2 PE=1 SV=5                                    | 69.05 | 2 | 28 | 28 | 137 | 0.716 | 1.008 | 0.896 | 0.931 | 407.06 | 69.05 | 51  | 137 | 433  | 48.6  | 5.95  |
| Q9CRA8   | Exosome complex component RRP46 OS=Mus musculus GN=Exoc5 PE=1 SV=1 - [EXOS5_MOUSE]                      | 14.04 | 1 | 4  | 4  | 4   | 1.547 | 1.166 | 1.033 | 0.931 | 3.78   | 14.04 | 4   | 4   | 235  | 25.2  | 7.56  |
| F6RGI3   | Protein Gm340 OS=Mus musculus GN=Gm340 PE=4 SV=1 - [F6RGI3_MOUSE]                                       | 2.90  | 1 | 1  | 2  | 3   | 0.209 | 0.669 | 0.696 | 0.931 | 3.15   | 2.90  | 2   | 3   | 1242 | 136.1 | 7.52  |
| A2RS76   | Vomer nasal 1 receptor, B3 OS=Mus musculus GN=Vmn1r53 PE=2 SV=1 - [A2RS76_MOUSE]                        | 3.55  | 2 | 1  | 1  | 1   | 1.983 | 1.328 | 1.312 | 0.931 | 0.00   | 3.55  | 1   | 1   | 310  | 35.4  | 9.66  |
| Q69299   | Zinc finger protein 512 OS=Mus musculus GN=Znf512 PE=2 SV=2 - [ZN512_MOUSE]                             | 19.04 | 1 | 10 | 10 | 22  | 0.659 | 0.751 | 0.871 | 0.931 | 57.87  | 19.04 | 16  | 22  | 562  | 63.9  | 9.51  |
| O88291   | DBIRD complex subunit ZNF326 OS=Mus musculus GN=Znf326 PE=1 SV=1 - [ZN326_MOUSE]                        | 21.03 | 3 | 10 | 10 | 41  | 1.000 | 0.775 | 0.956 | 0.931 | 115.19 | 21.03 | 16  | 41  | 580  | 65.2  | 5.19  |
| Q6DFW4   | Nucleolar protein 58 OS=Mus musculus GN=Nop58 PE=1 SV=1 - [NOPS8_MOUSE]                                 | 27.99 | 1 | 11 | 11 | 34  | 0.619 | 0.740 | 0.730 | 0.932 | 116.92 | 27.99 | 18  | 34  | 536  | 60.3  | 8.34  |
| D6RI31   | Disrupted in renal carcinoma protein 2 homolog OS=Mus musculus GN=Dirc2 PE=2 SV=1 - [D6RI31_MOUSE]      | 13.91 | 2 | 1  | 1  | 4   | 0.974 | 0.650 | 0.847 | 0.932 | 13.57  | 13.91 | 2   | 4   | 115  | 12.5  | 9.72  |

|          |                                                                                                                         |       |    |    |    |     |       |       |       |       |        |       |    |     |      |       |      |
|----------|-------------------------------------------------------------------------------------------------------------------------|-------|----|----|----|-----|-------|-------|-------|-------|--------|-------|----|-----|------|-------|------|
| G5E8E7   | Tyrosine-protein phosphatase non-receptor type OS=Mus musculus GN=Ptpn4 PE=3 SV=1 - [G5E8E7_MOUSE]                      | 13.39 | 4  | 8  | 8  | 25  | 0.727 | 0.839 | 0.888 | 0.932 | 53.29  | 13.39 | 14 | 25  | 926  | 105.8 | 7.25 |
| Q3U4S0   | Pantothenate kinase 2 (Hallervorden-Spatz syndrome) OS=Mus musculus GN=Pank2 PE=2 SV=1 - [Q3U4S0_MOUSE]                 | 15.12 | 4  | 5  | 7  | 14  | 0.993 | 0.983 | 0.925 | 0.932 | 41.78  | 15.12 | 11 | 14  | 443  | 48.6  | 8.44 |
| Q99K41   | EMILIN-1 OS=Mus musculus GN=Emilin1 PE=1 SV=1 - [EMIL1_MOUSE]                                                           | 9.34  | 1  | 6  | 6  | 15  | 1.030 | 3.125 | 0.679 | 0.932 | 40.44  | 9.34  | 11 | 15  | 1017 | 107.5 | 5.30 |
| Q543K9   | Purine nucleoside phosphorylase OS=Mus musculus GN=Pnp PE=2 SV=1 - [Q543K9_MOUSE]                                       | 51.56 | 3  | 11 | 11 | 56  | 1.937 | 1.031 | 0.763 | 0.932 | 168.34 | 51.56 | 22 | 56  | 289  | 32.2  | 6.16 |
| Q91VX9   | Transmembrane protein 168 OS=Mus musculus GN=Tmem168 PE=2 SV=1 - [TM168_MOUSE]                                          | 2.44  | 1  | 1  | 1  | 2   | 1.056 | 1.625 | 0.721 | 0.932 | 7.59   | 2.44  | 1  | 2   | 697  | 79.6  | 7.96 |
| G5E8E1   | Leucine rich repeat (In FLII) interacting protein 1, isoform CRA_e OS=Mus musculus GN=Lrrfp1 PE=4 SV=1 - [G5E8E1_MOUSE] | 33.64 | 2  | 1  | 13 | 49  | 1.472 | 0.497 | 1.325 | 0.932 | 154.52 | 33.64 | 21 | 49  | 428  | 48.9  | 5.57 |
| Q9CRA4   | Methylsterol monooxygenase 1 OS=Mus musculus GN=Msmo1 PE=2 SV=1 - [Q9CRA4_MOUSE]                                        | 8.53  | 2  | 2  | 2  | 7   | 0.852 | 0.554 | 0.893 | 0.932 | 28.69  | 8.53  | 3  | 7   | 293  | 34.7  | 7.66 |
| Q8BYU9   | Protein Secisbp2 OS=Mus musculus GN=Secisbp2 PE=2 SV=1 - [Q8BYU9_MOUSE]                                                 | 3.14  | 2  | 1  | 1  | 3   | 1.374 | 0.714 | 1.116 | 0.932 | 4.99   | 3.14  | 1  | 3   | 414  | 45.1  | 8.76 |
| E9QAE3   | Protein Btaf1 OS=Mus musculus GN=Btaf1 PE=2 SV=1 - [E9QAE3_MOUSE]                                                       | 4.92  | 1  | 6  | 6  | 15  | 0.970 | 1.336 | 0.940 | 0.932 | 26.08  | 4.92  | 10 | 15  | 1848 | 206.9 | 6.43 |
| Q8K2P7   | Sodium-coupled neutral amino acid transporter 1 OS=Mus musculus GN=Slc38a1 PE=1 SV=1 - [S38A1_MOUSE]                    | 5.36  | 2  | 3  | 3  | 6   | 0.546 | 0.516 | 0.668 | 0.932 | 12.95  | 5.36  | 4  | 6   | 485  | 53.8  | 7.08 |
| Q8VGL0   | MCG60008 OS=Mus musculus GN=Olfir340 PE=2 SV=1 - [Q8VGL0_MOUSE]                                                         | 1.92  | 1  | 1  | 1  | 1   | 1.161 | 1.190 | 0.988 | 0.932 | 1.72   | 1.92  | 1  | 1   | 312  | 34.9  | 7.47 |
| Q9QXD8   | LIM domain-containing protein 1 OS=Mus musculus GN=Limd1 PE=1 SV=2 - [LIMD1_MOUSE]                                      | 17.66 | 1  | 6  | 7  | 13  | 1.721 | 1.419 | 0.987 | 0.932 | 35.83  | 17.66 | 10 | 13  | 668  | 71.4  | 6.32 |
| Q6PCN7   | Helicase-like transcription factor OS=Mus musculus GN=Hlrf PE=1 SV=1 - [HLTF_MOUSE]                                     | 3.99  | 3  | 2  | 5  | 14  | 1.559 | 1.099 | 1.006 | 0.932 | 34.92  | 3.99  | 7  | 14  | 1003 | 113.2 | 8.09 |
| Q8CGK3   | Lon protease homolog, mitochondrial OS=Mus musculus GN=Lonp1 PE=1 SV=2 - [LONM_MOUSE]                                   | 43.52 | 2  | 34 | 37 | 174 | 0.597 | 0.747 | 0.837 | 0.932 | 521.71 | 43.52 | 66 | 174 | 949  | 105.8 | 6.57 |
| Q9R0H0   | Peroxisomal acyl-coenzyme A oxidase 1 OS=Mus musculus GN=Acox1 PE=1 SV=5 - [ACOX1_MOUSE]                                | 45.08 | 3  | 21 | 21 | 81  | 1.052 | 0.712 | 0.705 | 0.932 | 284.09 | 45.08 | 37 | 81  | 661  | 74.6  | 8.48 |
| P28740-1 | Isoform 1 of Kinesin-like protein KIF2A OS=Mus musculus GN=Kif2a - [KIF2A_MOUSE]                                        | 51.82 | 11 | 2  | 30 | 176 | 0.484 | 0.614 | 1.062 | 0.932 | 451.42 | 51.82 | 51 | 176 | 716  | 80.8  | 6.16 |
| P10518   | Delta-aminolevulinic acid dehydratase OS=Mus musculus GN=Alad PE=1 SV=1 - [HEM2_MOUSE]                                  | 32.42 | 1  | 8  | 8  | 111 | 2.579 | 1.452 | 1.689 | 0.932 | 300.82 | 32.42 | 16 | 111 | 330  | 36.0  | 6.79 |
| F6VQ81   | Tumor protein D54 (Fragment) OS=Mus musculus GN=Tpd52l2 PE=4 SV=1                                                       | 78.88 | 1  | 1  | 12 | 79  | 1.176 | 0.997 | 1.155 | 0.932 | 253.57 | 78.88 | 22 | 79  | 161  | 17.7  | 8.19 |
| Q91V76   | Ester hydrolase C11orf54 homolog OS=Mus musculus PE=2 SV=1 - [CK054_MOUSE]                                              | 35.87 | 1  | 9  | 9  | 27  | 1.609 | 0.945 | 0.833 | 0.933 | 65.66  | 35.87 | 17 | 27  | 315  | 35.0  | 6.29 |
| Q3TY65   | Islet cell autoantigen 1-like protein OS=Mus musculus GN=Ica11 PE=2 SV=1 - [IC11_MOUSE]                                 | 15.78 | 1  | 4  | 5  | 12  | 0.806 | 1.425 | 0.827 | 0.933 | 32.70  | 15.78 | 8  | 12  | 431  | 48.1  | 4.91 |
| Q80U38   | Protein KHNYN OS=Mus musculus GN=Khnyin PE=2 SV=2 - [KHNYN_MOUSE]                                                       | 18.93 | 1  | 9  | 9  | 16  | 1.296 | 1.055 | 0.782 | 0.933 | 50.97  | 18.93 | 13 | 16  | 671  | 74.5  | 7.87 |
| E9QA61   | MCG113054, isoform CRA_e OS=Mus musculus GN=Cap8l PE=4 SV=2 - [E9QA61_MOUSE]                                            | 2.23  | 3  | 1  | 3  | 16  | 1.110 | 1.287 | 0.909 | 0.933 | 37.03  | 2.23  | 5  | 16  | 806  | 91.8  | 6.30 |
| Q91WE9-2 | Isoform 2 of Protein FAM19A5 OS=Mus musculus GN=Fam19a5 - [F19A5_MOUSE]                                                 | 23.20 | 2  | 3  | 3  | 7   | 1.452 | 0.975 | 1.304 | 0.933 | 13.55  | 23.20 | 5  | 7   | 125  | 13.6  | 8.82 |
| E9PYI7   | Protein Lmo7 OS=Mus musculus GN=Lmo7 PE=2 SV=1 - [E9PYI7_MOUSE]                                                         | 23.95 | 6  | 25 | 25 | 67  | 1.577 | 1.789 | 2.663 | 0.933 | 213.41 | 23.95 | 40 | 67  | 1453 | 164.6 | 5.73 |
| E9QNN1   | ATP-dependent RNA helicase A OS=Mus musculus GN=Dhx9 PE=2 SV=1 - [E9QNN1_MOUSE]                                         | 34.90 | 6  | 40 | 41 | 191 | 0.758 | 0.900 | 0.811 | 0.933 | 640.53 | 34.90 | 68 | 191 | 1384 | 149.6 | 6.83 |



|          |                                                                                                          |       |   |     |     |      |       |       |       |       |         |       |     |      |      |       |      |
|----------|----------------------------------------------------------------------------------------------------------|-------|---|-----|-----|------|-------|-------|-------|-------|---------|-------|-----|------|------|-------|------|
| Q99PT1   | Rho GDP-dissociation inhibitor 1 OS=Mus musculus GN=Arhgdia PE=1 SV=3                                    | 74.02 | 1 | 19  | 19  | 187  | 1.312 | 0.890 | 0.803 | 0.933 | 509.85  | 74.02 | 31  | 187  | 204  | 23.4  | 5.20 |
| H7BWZ3   | Actin-related protein 2/3 complex subunit 3 OS=Mus musculus GN=Arpc3 PE=2 SV=1 [H7BWZ3_MOUSE]            | 38.24 | 4 | 8   | 8   | 36   | 0.615 | 1.581 | 1.076 | 0.933 | 84.40   | 38.24 | 14  | 36   | 170  | 19.6  | 8.60 |
| P84084   | ADP-ribosylation factor 5 OS=Mus musculus GN=Arf5 PE=2 SV=2 [ARF5_MOUSE]                                 | 57.78 | 4 | 2   | 9   | 215  | 0.769 | 1.207 | 1.010 | 0.933 | 567.74  | 57.78 | 17  | 215  | 180  | 20.5  | 6.79 |
| E9Q0P8   | Serine/threonine-protein kinase A-Raf OS=Mus musculus GN=Araf PE=2 SV=1 [E9Q0P8_MOUSE]                   | 34.37 | 2 | 3   | 11  | 45   | 0.748 | 0.948 | 0.953 | 0.933 | 112.72  | 34.37 | 21  | 45   | 419  | 46.2  | 9.28 |
| Q8BNU1   | Ras-related protein Rab-26 OS=Mus musculus GN=Rab26 PE=2 SV=1 [Q8BNU1_MOUSE]                             | 16.24 | 3 | 1   | 2   | 51   | 0.764 | 0.951 | 1.088 | 0.933 | 146.47  | 16.24 | 4   | 51   | 197  | 20.7  | 9.58 |
| Q9QYR6   | Microtubule-associated protein 1A OS=Mus musculus GN=Map1a PE=1 SV=2                                     | 51.08 | 3 | 106 | 108 | 1446 | 1.937 | 1.045 | 1.553 | 0.934 | 4501.76 | 51.08 | 181 | 1446 | 2776 | 300.0 | 5.00 |
| E9PUL4   | Gem-associated protein 5 OS=Mus musculus GN=Gemin5 PE=2 SV=1 [E9PUL4_MOUSE]                              | 11.71 | 4 | 16  | 16  | 36   | 1.191 | 1.042 | 0.938 | 0.934 | 94.36   | 11.71 | 26  | 36   | 1503 | 166.6 | 6.74 |
| G3UWG1   | MCG115977 OS=Mus musculus GN=Gm10108 PE=3 SV=1 [G3UWG1_MOUSE]                                            | 69.52 | 2 | 8   | 12  | 455  | 1.750 | 0.731 | 1.337 | 0.934 | 1363.73 | 69.52 | 22  | 455  | 105  | 11.7  | 9.64 |
| D3Z3A0   | MCG126099, isoform CRA_b OS=Mus musculus GN=Ppp1r2 PE=4 SV=1 [D3Z3A0_MOUSE]                              | 52.82 | 6 | 8   | 8   | 39   | 1.607 | 1.216 | 1.538 | 0.934 | 105.05  | 52.82 | 15  | 39   | 195  | 21.9  | 4.73 |
| Q6P8X1   | Sorting nexin-6 OS=Mus musculus GN=Srx6 PE=1 SV=2 [SNX6_MOUSE]                                           | 42.61 | 1 | 14  | 17  | 84   | 1.018 | 1.076 | 0.872 | 0.934 | 232.16  | 42.61 | 32  | 84   | 406  | 46.6  | 6.16 |
| Q8VCQ8   | Caldesmon 1 OS=Mus musculus GN=Cald1 PE=2 SV=1 [Q8VCQ8_MOUSE]                                            | 35.85 | 4 | 11  | 19  | 94   | 1.010 | 1.144 | 1.022 | 0.934 | 239.82  | 35.85 | 32  | 94   | 530  | 60.4  | 7.37 |
| Q9DAP0   | Leucine-rich repeat-containing protein 46 OS=Mus musculus GN=Lrrc46 PE=2 SV=2 [LRC46_MOUSE]              | 4.02  | 1 | 1   | 1   | 8    | 1.148 | 1.063 | 1.407 | 0.934 | 22.17   | 4.02  | 1   | 8    | 323  | 36.0  | 5.39 |
| F6ZFT1   | Acyl carrier protein (Fragment) OS=Mus musculus GN=Ndufab1 PE=2 SV=1                                     | 55.12 | 3 | 6   | 6   | 51   | 1.789 | 1.161 | 1.356 | 0.934 | 148.94  | 55.12 | 11  | 51   | 127  | 14.3  | 4.77 |
| Q8R5H1-5 | Isoform 5 of Ubiquitin carboxyl-terminal hydrolase 15 OS=Mus musculus GN=Usp15 [UBP15_MOUSE]             | 39.18 | 4 | 1   | 27  | 68   | 0.940 | 0.832 | 0.887 | 0.934 | 198.88  | 39.18 | 41  | 68   | 952  | 109.2 | 5.11 |
| Q30D77   | Collagen alpha-1(XIV) chain OS=Mus musculus GN=Col24a1 PE=2 SV=2 [COO1_MOUSE]                            | 5.25  | 1 | 5   | 5   | 8    | 0.836 | 3.625 | 1.010 | 0.934 | 17.49   | 5.25  | 6   | 8    | 1733 | 175.6 | 7.34 |
| Q9EP75   | Leukotriene-B4 omega-hydroxylase 3 OS=Mus musculus GN=Cyp4f14 PE=2 SV=1                                  | 4.58  | 4 | 2   | 2   | 3    | 0.531 | 1.069 | 0.963 | 0.934 | 11.12   | 4.58  | 3   | 3    | 524  | 59.8  | 6.87 |
| Q9DBL2   | Ganglioside-induced differentiation-associated protein 2 OS=Mus musculus GN=Gdap2 PE=2 SV=1 [GAP2_MOUSE] | 19.48 | 2 | 8   | 8   | 14   | 1.139 | 1.251 | 0.897 | 0.934 | 39.88   | 19.48 | 11  | 14   | 498  | 56.2  | 5.39 |
| E9PY46   | Protein Irf140 OS=Mus musculus GN=Irf140 PE=2 SV=1 [E9PY46_MOUSE]                                        | 5.19  | 2 | 7   | 7   | 12   | 0.604 | 0.907 | 0.707 | 0.934 | 33.04   | 5.19  | 12  | 12   | 1464 | 165.8 | 5.91 |
| Q69ZU8-2 | Isoform 2 of Ankyrin repeat domain-containing protein 6 OS=Mus musculus GN=Ankr6 [ANKR6_MOUSE]           | 3.55  | 2 | 1   | 1   | 4    | 1.270 | 0.768 | 1.207 | 0.934 | 0.00    | 3.55  | 1   | 4    | 677  | 73.7  | 8.92 |
| Q922H1-2 | Isoform 2 of Protein arginine N-methyltransferase 3 OS=Mus musculus GN=Prrn3 [PRN3_MOUSE]                | 17.05 | 4 | 7   | 8   | 15   | 0.764 | 0.808 | 0.857 | 0.934 | 42.05   | 17.05 | 13  | 15   | 528  | 59.4  | 5.30 |
| Q8VE92   | RNA-binding protein 4B OS=Mus musculus GN=Rbm4b PE=1 SV=1 [RBM4B_MOUSE]                                  | 26.33 | 4 | 1   | 8   | 35   | 1.555 | 0.809 | 0.887 | 0.934 | 104.55  | 26.33 | 16  | 35   | 357  | 40.0  | 6.74 |
| Q921F4   | Heterogeneous nuclear ribonucleoprotein L-like OS=Mus musculus GN=HnrnpL PE=1 SV=3 [HNRLL_MOUSE]         | 43.82 | 3 | 20  | 20  | 71   | 0.865 | 0.961 | 0.865 | 0.934 | 228.44  | 43.82 | 35  | 71   | 591  | 64.1  | 5.85 |
| G5E884   | Serine/threonine-protein kinase PAK 1 OS=Mus musculus GN=Pak1 PE=4 SV=1 [G5E884_MOUSE]                   | 54.23 | 2 | 13  | 27  | 297  | 1.200 | 1.116 | 1.581 | 0.934 | 808.50  | 54.23 | 51  | 297  | 544  | 60.6  | 5.86 |
| Q8VDP6   | CDP-diacylglycerol-inositol 3-phosphatidytransferase OS=Mus musculus GN=Cdipt PE=1 SV=1 [CDIPT_MOUSE]    | 9.86  | 1 | 2   | 2   | 26   | 0.909 | 1.281 | 0.912 | 0.934 | 69.69   | 9.86  | 4   | 26   | 213  | 23.6  | 8.27 |
| G3XA30   | MCG1618, isoform CRA_c OS=Mus musculus GN=Nsmce4a PE=4 SV=1 [G3XA30_MOUSE]                               | 7.09  | 1 | 2   | 2   | 7    | 1.374 | 0.890 | 0.850 | 0.935 | 16.03   | 7.09  | 3   | 7    | 381  | 43.7  | 5.30 |

|          |                                                                                                                                     |       |   |    |    |     |       |       |       |       |         |       |    |     |      |       |       |
|----------|-------------------------------------------------------------------------------------------------------------------------------------|-------|---|----|----|-----|-------|-------|-------|-------|---------|-------|----|-----|------|-------|-------|
| Q9CQ85   | CDGSH iron-sulfur domain-containing protein 2<br>OS=Mus musculus<br>GN=Cisd2 PE=1 SV=1 - [CISD2_MOUSE]                              | 50.37 | 2 | 6  | 6  | 20  | 0.684 | 0.923 | 0.741 | 0.935 | 55.51   | 50.37 | 11 | 20  | 135  | 15.2  | 9.51  |
| Q3TDD9   | Protein phosphatase 1 regulatory subunit 21<br>OS=Mus musculus<br>GN=Ppp1r21 PE=2 SV=2 - [PPR21_MOUSE]                              | 39.10 | 3 | 31 | 32 | 101 | 1.060 | 0.980 | 0.956 | 0.935 | 312.89  | 39.10 | 49 | 101 | 780  | 88.3  | 6.90  |
| Q8RSL3-2 | Isoform 2 of Vam6/Vps39-like protein<br>OS=Mus musculus<br>GN=Vps39 - [VPS39_MOUSE]                                                 | 14.97 | 2 | 10 | 11 | 29  | 0.803 | 0.993 | 0.764 | 0.935 | 73.54   | 14.97 | 19 | 29  | 875  | 100.6 | 7.12  |
| Q505D9   | Tripartite motif-containing protein 67<br>OS=Mus musculus<br>GN=Trim67 PE=2 SV=1 -                                                  | 9.77  | 1 | 4  | 6  | 8   | 0.948 | 1.124 | 1.433 | 0.935 | 19.26   | 9.77  | 7  | 8   | 768  | 82.7  | 7.08  |
| Q3TA40   | Protein 6430548M08RIK<br>OS=Mus musculus<br>GN=6430548M08RIK PE=2 SV=1 - [Q3TA40_MOUSE]                                             | 40.81 | 4 | 16 | 16 | 85  | 0.761 | 1.667 | 1.287 | 0.935 | 225.43  | 40.81 | 29 | 85  | 397  | 45.2  | 5.07  |
| Q8BMJ2   | Leucine-RNA ligase, cytoplasmic<br>OS=Mus musculus<br>GN=Lars PE=2 SV=2 - [SYLC_MOUSE]                                              | 35.57 | 1 | 36 | 36 | 139 | 0.875 | 0.790 | 0.875 | 0.935 | 405.20  | 35.57 | 62 | 139 | 1178 | 134.1 | 7.05  |
| Q8BNV1   | tRNA (uracil-5)-methyltransferase homolog A<br>OS=Mus musculus<br>GN=Trm2a PE=2 SV=1 - [TRM2A_MOUSE]                                | 11.32 | 5 | 4  | 4  | 6   | 0.954 | 0.976 | 0.883 | 0.935 | 14.37   | 11.32 | 5  | 6   | 574  | 63.3  | 7.25  |
| D3Z5G2   | Solute carrier family 25 member 45 (Fragment)<br>OS=Mus musculus<br>GN=Slc25a45 PE=2 SV=1 - [D3Z5G2_MOUSE]                          | 21.03 | 2 | 2  | 2  | 2   | 1.918 | 1.217 | 0.941 | 0.935 | 2.85    | 21.03 | 2  | 2   | 195  | 21.3  | 8.82  |
| Q6GQX2   | Nck-associated protein 5-like<br>OS=Mus musculus<br>GN=Nckap5l PE=2 SV=1 - [NCKSL_MOUSE]                                            | 3.78  | 2 | 3  | 3  | 5   | 0.889 | 0.553 | 1.111 | 0.935 | 11.74   | 3.78  | 5  | 5   | 1323 | 138.1 | 8.37  |
| Q9CR13   | UPF0562 protein C7orf55 homolog<br>OS=Mus musculus<br>PE=3 SV=1 - [CG055_MOUSE]                                                     | 13.27 | 1 | 1  | 1  | 2   | 1.202 | 0.835 | 0.626 | 0.935 | 10.42   | 13.27 | 2  | 2   | 113  | 12.7  | 10.08 |
| Q9CZ30   | Obg-like ATPase 1<br>OS=Mus musculus<br>GN=Ola1 PE=1 SV=1 - [OLA1_MOUSE]                                                            | 51.77 | 3 | 19 | 20 | 93  | 0.677 | 1.018 | 0.908 | 0.935 | 263.52  | 51.77 | 35 | 93  | 396  | 44.7  | 7.81  |
| Q08943   | FACT complex subunit SSRP1<br>OS=Mus musculus<br>GN=Ssrp1 PE=1 SV=2 - [SSRP1_MOUSE]                                                 | 17.23 | 3 | 11 | 11 | 31  | 0.929 | 1.027 | 0.790 | 0.935 | 88.87   | 17.23 | 20 | 31  | 708  | 80.8  | 6.76  |
| Q3LAC4   | Phosphatidylinositol 3,4,5-trisphosphate-dependent Rac exchanger 2 protein<br>OS=Mus musculus<br>GN=Prex2 PE=2 SV=2 - [PREX2_MOUSE] | 7.51  | 4 | 10 | 11 | 17  | 0.762 | 1.038 | 1.026 | 0.935 | 48.77   | 7.51  | 15 | 17  | 1598 | 181.6 | 7.34  |
| Q6PFD9   | Nuclear pore complex protein Nup98-Nup96<br>OS=Mus musculus<br>GN=Nup98 PE=1 SV=2 - [NUP98_MOUSE]                                   | 19.55 | 1 | 28 | 29 | 89  | 1.232 | 1.044 | 1.133 | 0.935 | 212.84  | 19.55 | 46 | 89  | 1816 | 197.1 | 6.18  |
| E9Q035   | Protein Gm20425<br>OS=Mus musculus<br>GN=Gm20425 PE=4 SV=1 - [E9Q035_MOUSE]                                                         | 51.43 | 6 | 10 | 52 | 497 | 1.048 | 1.056 | 0.705 | 0.935 | 1415.80 | 51.43 | 95 | 497 | 978  | 107.7 | 7.77  |
| Q5FWI3   | Transmembrane protein 2<br>OS=Mus musculus<br>GN=Tmem2 PE=1 SV=1 - [TMEM2_MOUSE]                                                    | 5.06  | 1 | 6  | 7  | 11  | 0.957 | 1.244 | 0.974 | 0.935 | 27.87   | 5.06  | 9  | 11  | 1383 | 153.7 | 7.78  |
| Q9Z1R9   | MCG124046<br>OS=Mus musculus<br>GN=Prss1 PE=2 SV=1 - [Q9Z1R9_MOUSE]                                                                 | 12.20 | 2 | 1  | 2  | 776 | 1.092 | 1.360 | 0.944 | 0.935 | 1720.88 | 12.20 | 4  | 776 | 246  | 26.1  | 4.94  |
| F6QM03   | Protein CBFA2T2 (Fragment)<br>OS=Mus musculus<br>GN=Cbfa2t2 PE=4 SV=1 -                                                             | 8.85  | 1 | 1  | 1  | 1   | 2.022 | 1.122 | 0.981 | 0.935 | 2.72    | 8.85  | 1  | 1   | 192  | 20.3  | 9.74  |
| Q60520   | Paired amphipathic helix protein Sin3a<br>OS=Mus musculus<br>GN=Sin3a PE=1 SV=3 - [SIN3A_MOUSE]                                     | 11.38 | 4 | 11 | 11 | 25  | 0.674 | 1.082 | 0.807 | 0.935 | 70.89   | 11.38 | 17 | 25  | 1274 | 145.0 | 7.25  |
| Q6PHQ8   | N-alpha-acetyltransferase 35, NatC auxiliary subunit<br>OS=Mus musculus<br>GN=Naa35 PE=1 SV=1 - [NAA35_MOUSE]                       | 26.76 | 6 | 15 | 17 | 42  | 0.701 | 0.846 | 0.914 | 0.935 | 128.05  | 26.76 | 28 | 42  | 725  | 83.3  | 7.30  |
| Q8BP22   | Protein FAM92A1<br>OS=Mus musculus<br>GN=Fam92a1 PE=1 SV=1 - [F92A1_MOUSE]                                                          | 16.06 | 4 | 6  | 6  | 14  | 1.163 | 0.945 | 0.903 | 0.936 | 30.86   | 16.06 | 12 | 14  | 355  | 39.9  | 7.36  |
| P58459-3 | Isoform 3 of A disintegrin and metalloproteinase with thrombospondin motifs 10<br>OS=Mus musculus<br>GN=Adamts10 [ATS10_MOUSE]      | 9.86  | 1 | 1  | 1  | 1   | 0.714 | 0.663 | 1.390 | 0.936 | 3.02    | 9.86  | 1  | 1   | 213  | 24.0  | 9.41  |
| Q8CGF6   | WD repeat-containing protein 47<br>OS=Mus musculus<br>GN=Wdr47 PE=1 SV=2 -                                                          | 40.00 | 2 | 28 | 29 | 121 | 1.016 | 1.053 | 0.960 | 0.936 | 412.16  | 40.00 | 51 | 121 | 920  | 102.2 | 5.97  |
| Q9JME9   | V-set and transmembrane domain-containing protein 2B<br>OS=Mus musculus<br>GN=Vstm2b PE=2 SV=1 - [VTM2B_MOUSE]                      | 25.96 | 1 | 5  | 5  | 20  | 1.263 | 1.555 | 1.145 | 0.936 | 68.09   | 25.96 | 9  | 20  | 285  | 30.1  | 7.15  |

|          |                                                                                                                                     |       |   |    |    |     |       |       |       |       |        |       |    |     |      |       |       |
|----------|-------------------------------------------------------------------------------------------------------------------------------------|-------|---|----|----|-----|-------|-------|-------|-------|--------|-------|----|-----|------|-------|-------|
| G5E8J3   | Bromodomain and WD repeat domain containing 2, isoform CRA_a OS=Mus musculus GN=Wdr11 PE=4 SV=1 - [G5E8J3_MOUSE]                    | 18.23 | 2 | 17 | 18 | 44  | 0.717 | 1.038 | 0.902 | 0.936 | 127.63 | 18.23 | 28 | 44  | 1223 | 135.9 | 7.11  |
| Q6PD03   | Serine/threonine-protein phosphatase 2A 56 kDa regulatory subunit alpha isoform OS=Mus musculus GN=Ppp2r5a PE=1 SV=1 - [2A5A_MOUSE] | 26.54 | 1 | 10 | 12 | 24  | 1.966 | 1.391 | 1.161 | 0.936 | 73.18  | 26.54 | 19 | 24  | 486  | 56.3  | 7.03  |
| Q8CSL3-2 | Isoform 2 of CCR4-NOT transcription complex subunit 2 OS=Mus musculus GN=Cnot2 - [CNOT2_MOUSE]                                      | 25.42 | 5 | 10 | 10 | 41  | 1.124 | 1.011 | 1.107 | 0.936 | 119.52 | 25.42 | 16 | 41  | 531  | 58.6  | 7.37  |
| Q8K4P8   | E3 ubiquitin-protein ligase HECW1 OS=Mus musculus GN=Hecw1 PE=2 SV=3 - [HECW1_MOUSE]                                                | 11.91 | 6 | 13 | 16 | 37  | 0.658 | 0.654 | 1.113 | 0.936 | 98.10  | 11.91 | 27 | 37  | 1604 | 179.4 | 5.39  |
| Q925B0-2 | Isoform 2 of PRKC apoptosis WT1 regulator protein OS=Mus musculus GN=Pawr -                                                         | 22.84 | 2 | 6  | 6  | 9   | 0.926 | 1.355 | 0.908 | 0.936 | 26.71  | 22.84 | 7  | 9   | 289  | 30.9  | 8.66  |
| E9Q150   | Segment polarity protein dishevelled homolog DVL-3 OS=Mus musculus GN=Dvl3 PE=2 SV=1 - [E9Q150_MOUSE]                               | 10.59 | 4 | 6  | 8  | 18  | 1.055 | 0.767 | 1.060 | 0.936 | 46.02  | 10.59 | 12 | 18  | 699  | 76.3  | 6.70  |
| Q91VR8   | Protein BRICK1 OS=Mus musculus GN=Brk1 PE=2 SV=1 - [BRK1_MOUSE]                                                                     | 73.33 | 1 | 8  | 8  | 61  | 0.877 | 1.589 | 1.216 | 0.936 | 171.09 | 73.33 | 16 | 61  | 75   | 8.8   | 5.45  |
| Q9DB54   | Protein FAM216A OS=Mus musculus GN=Fam216a PE=2 SV=1 - [F216A_MOUSE]                                                                | 6.77  | 1 | 1  | 2  | 5   | 1.236 | 1.170 | 1.418 | 0.936 | 10.49  | 6.77  | 3  | 5   | 251  | 28.3  | 9.70  |
| Q9QYK7   | RING finger protein 11 OS=Mus musculus GN=Rnf11 PE=1 SV=1 - [RNF11_MOUSE]                                                           | 46.75 | 1 | 4  | 4  | 12  | 1.001 | 1.258 | 1.093 | 0.936 | 33.66  | 46.75 | 7  | 12  | 154  | 17.4  | 4.78  |
| Q8CG79   | Apoptosis-stimulating of p53 protein 2 OS=Mus musculus GN=Tp53bp2 PE=1 SV=3 - [ASPP2_MOUSE]                                         | 18.44 | 2 | 13 | 14 | 39  | 1.435 | 0.709 | 1.107 | 0.936 | 118.68 | 18.44 | 22 | 39  | 1128 | 125.2 | 6.34  |
| O35601-2 | Isoform Fyb-120 of FYN-binding protein OS=Mus musculus GN=Fyb - [FYB_MOUSE]                                                         | 2.59  | 2 | 2  | 2  | 2   | 1.473 | 1.017 | 1.201 | 0.936 | 4.27   | 2.59  | 2  | 2   | 773  | 84.8  | 6.71  |
| F8VQJ3   | Laminin subunit gamma-1 OS=Mus musculus GN=Lamc1 PE=2 SV=1 - [F8VQJ3_MOUSE]                                                         | 29.50 | 3 | 2  | 38 | 150 | 1.212 | 1.498 | 0.757 | 0.936 | 424.42 | 29.50 | 67 | 150 | 1607 | 177.1 | 5.19  |
| A2RSY6   | TRMT1-like protein OS=Mus musculus GN=Trmt1l PE=2 SV=1 - [TRM1L_MOUSE]                                                              | 5.49  | 4 | 4  | 4  | 7   | 2.081 | 1.152 | 0.760 | 0.936 | 16.46  | 5.49  | 5  | 7   | 728  | 80.8  | 7.50  |
| G3XBW7   | CDC23 (Cell division cycle 23, yeast, homolog), isoform CRA_a OS=Mus musculus GN=Cdc23 PE=4 SV=1 - [G3XBW7_MOUSE]                   | 19.61 | 3 | 9  | 10 | 21  | 0.696 | 1.005 | 0.854 | 0.936 | 75.26  | 19.61 | 15 | 21  | 571  | 65.8  | 6.83  |
| F8WIU7   | Putative protein arginine N-methyltransferase 10 OS=Mus musculus GN=Prrm10 PE=2 SV=1 - [F8WIU7_MOUSE]                               | 2.36  | 3 | 2  | 2  | 3   | 0.883 | 1.065 | 0.942 | 0.936 | 5.47   | 2.36  | 3  | 3   | 846  | 94.1  | 5.36  |
| Q9CQG1   | Cation transport regulator-like protein 2 OS=Mus musculus GN=Chac2 PE=2 SV=1 - [CHAC2_MOUSE]                                        | 30.34 | 2 | 4  | 4  | 12  | 1.010 | 0.769 | 0.846 | 0.936 | 36.61  | 30.34 | 7  | 12  | 178  | 20.1  | 5.68  |
| Q8CI11-2 | Isoform 2 of Guanine nucleotide-binding protein-like 3 OS=Mus musculus GN=Gnl3 - [GNL3_MOUSE]                                       | 9.90  | 5 | 2  | 4  | 12  | 1.087 | 0.956 | 0.817 | 0.936 | 27.09  | 9.90  | 6  | 12  | 505  | 57.2  | 9.44  |
| P70671   | Interferon regulatory factor 3 OS=Mus musculus GN=Irf3 PE=1 SV=1 - [IRF3_MOUSE]                                                     | 10.98 | 1 | 5  | 5  | 14  | 0.893 | 0.973 | 0.850 | 0.936 | 30.38  | 10.98 | 9  | 14  | 419  | 46.8  | 5.43  |
| Q00560   | Interleukin-6 receptor subunit beta OS=Mus musculus GN=Il6st PE=1 SV=2 - [IL6RB_MOUSE]                                              | 14.18 | 1 | 9  | 9  | 28  | 1.335 | 0.995 | 0.982 | 0.936 | 77.94  | 14.18 | 17 | 28  | 917  | 102.4 | 5.52  |
| Q8K2L8   | Trafficking protein particle complex subunit 12 OS=Mus musculus GN=Trappc12 PE=1 SV=2 - [TPC12_MOUSE]                               | 29.86 | 2 | 20 | 20 | 60  | 1.051 | 1.109 | 1.008 | 0.937 | 162.21 | 29.86 | 32 | 60  | 797  | 87.6  | 4.81  |
| Q07235   | Glia-derived nexin OS=Mus musculus GN=Serpine2 PE=2 SV=2 - [GDN_MOUSE]                                                              | 37.78 | 1 | 13 | 14 | 38  | 0.574 | 0.583 | 0.746 | 0.937 | 98.14  | 37.78 | 25 | 38  | 397  | 44.2  | 9.85  |
| Q9CZP7-2 | Isoform 2 of Hsp90 co-chaperone Cdc37-like 1 OS=Mus musculus GN=Cdc37l1 -                                                           | 9.77  | 4 | 4  | 4  | 9   | 1.437 | 0.703 | 1.006 | 0.937 | 25.44  | 9.77  | 7  | 9   | 307  | 35.4  | 5.92  |
| Q9CR59   | Growth arrest and DNA damage-inducible proteins-interacting protein 1 OS=Mus musculus GN=Gadd45gip1 PE=2 SV=1 - [G45IP_MOUSE]       | 27.48 | 1 | 5  | 5  | 14  | 1.114 | 0.684 | 1.008 | 0.937 | 33.63  | 27.48 | 8  | 14  | 222  | 25.8  | 10.27 |

|          |                                                                                                                            |       |   |    |    |     |       |       |       |       |         |       |    |     |      |       |       |
|----------|----------------------------------------------------------------------------------------------------------------------------|-------|---|----|----|-----|-------|-------|-------|-------|---------|-------|----|-----|------|-------|-------|
| Q62383   | Transcription elongation factor SPT6 OS=Mus musculus GN=Supt6h PE=1 SV=2 - [SPT6H_MOUSE]                                   | 11.53 | 1 | 17 | 17 | 32  | 0.762 | 0.937 | 0.843 | 0.937 | 101.75  | 11.53 | 27 | 32  | 1726 | 199.0 | 4.93  |
| Q9Z1K5   | E3 ubiquitin-protein ligase ARIH1 OS=Mus musculus GN=Arh1 PE=2 SV=3 - [ARI1_MOUSE]                                         | 20.90 | 3 | 10 | 10 | 25  | 0.949 | 1.196 | 0.969 | 0.937 | 80.21   | 20.90 | 16 | 25  | 555  | 64.0  | 5.08  |
| P22724   | Protein Wnt-4 OS=Mus musculus GN=Wnt4 PE=1 SV=1 - [WNT4_MOUSE]                                                             | 3.99  | 1 | 1  | 1  | 1   | 1.327 | 1.261 | 0.696 | 0.937 | 2.63    | 3.99  | 1  | 1   | 351  | 39.0  | 8.51  |
| Q9QYL7   | Activator of basal transcription 1 OS=Mus musculus GN=Abt1 PE=2 SV=1 - [ABT1_MOUSE]                                        | 9.29  | 1 | 2  | 2  | 2   | 1.508 | 1.129 | 0.933 | 0.937 | 5.51    | 9.29  | 2  | 2   | 269  | 30.6  | 10.01 |
| Q9WUL7   | ADP-ribosylation factor-like protein 3 OS=Mus musculus GN=Arf3 PE=1 SV=1 - [ARL3_MOUSE]                                    | 48.35 | 1 | 6  | 6  | 27  | 1.676 | 1.027 | 0.896 | 0.937 | 112.10  | 48.35 | 12 | 27  | 182  | 20.5  | 7.24  |
| F8WHV4   | Collagen alpha-1(XIX) chain OS=Mus musculus GN=Col19a1 PE=2 SV=1 - [F8WHV4_MOUSE]                                          | 4.96  | 2 | 2  | 3  | 7   | 0.898 | 0.905 | 0.749 | 0.937 | 17.89   | 4.96  | 3  | 7   | 1069 | 108.2 | 8.25  |
| Q9JMG7   | Hepatoma-derived growth factor-related protein 3 OS=Mus musculus GN=Hdgrp3 PE=1 SV=2 - [HDGR3_MOUSE]                       | 30.69 | 2 | 6  | 7  | 27  | 0.798 | 0.632 | 1.157 | 0.937 | 64.11   | 30.69 | 12 | 27  | 202  | 22.4  | 8.40  |
| E9Q816   | Protein Cyp2w1 OS=Mus musculus GN=Cyp2w1 PE=3 SV=1 - [E9Q816_MOUSE]                                                        | 1.22  | 1 | 1  | 1  | 1   | 3.545 | 1.275 | 0.970 | 0.937 | 2.19    | 1.22  | 1  | 1   | 493  | 54.4  | 9.14  |
| Q8BUY8   | G-protein coupled receptor-associated sorting protein 2 OS=Mus musculus GN=Gprasp2 PE=2 SV=2 - [GASP2_MOUSE]               | 20.22 | 1 | 11 | 11 | 21  | 0.972 | 0.629 | 0.662 | 0.937 | 53.20   | 20.22 | 17 | 21  | 826  | 92.7  | 5.11  |
| Q8BIZ1-3 | Isoform 3 of Ankyrin repeat and sterile alpha motif domain-containing protein 1B OS=Mus musculus GN=Anks1b - [ANS1B_MOUSE] | 36.88 | 2 | 1  | 15 | 63  | 0.403 | 2.111 | 2.921 | 0.937 | 167.30  | 36.88 | 28 | 63  | 404  | 45.5  | 8.38  |
| P26231   | Catenin alpha-1 OS=Mus musculus GN=Ctnna1 PE=1 SV=1 - [CTNA1_MOUSE]                                                        | 53.42 | 1 | 23 | 39 | 153 | 0.785 | 1.145 | 0.817 | 0.937 | 442.60  | 53.42 | 69 | 153 | 906  | 100.0 | 6.23  |
| Q9CQ22   | Ragulator complex protein LAMTOR1 OS=Mus musculus GN=Lamtor1 PE=1 SV=1 - [LTOR1_MOUSE]                                     | 47.83 | 1 | 6  | 6  | 36  | 0.775 | 1.124 | 0.796 | 0.937 | 95.02   | 47.83 | 10 | 36  | 161  | 17.7  | 5.15  |
| Q8CB77   | Transcription elongation factor B polypeptide 3 OS=Mus musculus GN=Toeb3 PE=1 SV=3 - [ELOA1_MOUSE]                         | 6.34  | 1 | 4  | 5  | 8   | 1.591 | 0.925 | 0.984 | 0.937 | 15.77   | 6.34  | 6  | 8   | 773  | 87.1  | 9.61  |
| Q6P9K8   | Caskin-1 OS=Mus musculus GN=Caskin1 PE=1 SV=2 - [CSK1_MOUSE]                                                               | 48.57 | 5 | 45 | 50 | 352 | 0.953 | 0.628 | 1.119 | 0.937 | 1084.81 | 48.57 | 92 | 352 | 1431 | 150.4 | 9.17  |
| Q5SV85-2 | Isoform 2 of Synergyn gamma OS=Mus musculus GN=Synrg - [SYNRG_MOUSE]                                                       | 42.53 | 6 | 36 | 37 | 150 | 1.336 | 1.113 | 1.336 | 0.938 | 446.25  | 42.53 | 61 | 150 | 1138 | 122.0 | 5.00  |
| D3Z7A9   | Protein Lira5 OS=Mus musculus GN=Lira5 PE=4 SV=1 - [D3Z7A9_MOUSE]                                                          | 5.76  | 1 | 1  | 1  | 2   | 0.786 | 1.136 | 0.966 | 0.938 | 6.15    | 5.76  | 1  | 2   | 295  | 32.7  | 7.14  |
| Q80UP3   | Diacylglycerol kinase zeta OS=Mus musculus GN=Dgkz PE=1 SV=2 - [DGKZ_MOUSE]                                                | 14.53 | 3 | 9  | 11 | 46  | 0.644 | 1.539 | 1.731 | 0.938 | 129.36  | 14.53 | 20 | 46  | 929  | 104.0 | 8.09  |
| Q69ZK7   | Protein FAM214A OS=Mus musculus GN=Fam214a PE=2 SV=3 - [F214A_MOUSE]                                                       | 2.33  | 2 | 2  | 2  | 4   | 1.323 | 0.892 | 1.124 | 0.938 | 3.92    | 2.33  | 2  | 4   | 1075 | 119.2 | 7.74  |
| Q9WUM4   | Coronin-1C OS=Mus musculus GN=Coro1c PE=1 SV=2 - [COR1C_MOUSE]                                                             | 36.29 | 4 | 18 | 22 | 135 | 0.590 | 0.741 | 0.960 | 0.938 | 353.91  | 36.29 | 41 | 135 | 474  | 53.1  | 7.08  |
| E9Q9M5   | Ubiquitin carboxyl-terminal hydrolase OS=Mus musculus GN=Usp19 PE=2 SV=1 - [E9Q9M5_MOUSE]                                  | 18.01 | 4 | 16 | 16 | 56  | 0.921 | 0.924 | 0.919 | 0.938 | 146.99  | 18.01 | 26 | 56  | 1299 | 143.4 | 6.23  |
| Q9CQ80   | siRNA-activating protein complex subunit 3 OS=Mus musculus GN=Snapc3 PE=2 SV=1 - [Q9CQ80_MOUSE]                            | 10.41 | 2 | 1  | 1  | 1   | 0.966 | 1.072 | 1.189 | 0.938 | 0.00    | 10.41 | 1  | 1   | 269  | 29.9  | 4.70  |
| Q9DC29   | ATP-binding cassette sub-family B member 6, mitochondrial OS=Mus musculus GN=Abcb6 PE=1 SV=1 - [ABCB6_MOUSE]               | 15.56 | 1 | 6  | 8  | 24  | 1.143 | 1.192 | 0.797 | 0.938 | 86.80   | 15.56 | 12 | 24  | 842  | 93.7  | 8.05  |
| F8VQ05   | Protein Fryl OS=Mus musculus GN=Fryl PE=4 SV=1 - [F8VQ05_MOUSE]                                                            | 6.98  | 1 | 14 | 16 | 29  | 1.249 | 0.855 | 0.879 | 0.938 | 64.92   | 6.98  | 26 | 29  | 3007 | 337.6 | 5.63  |
| D3Z5P5   | DNA-binding protein SMURP-2 OS=Mus musculus GN=Ighmbp2 PE=2 SV=1 -                                                         | 3.05  | 2 | 2  | 2  | 4   | 0.718 | 1.144 | 1.021 | 0.938 | 7.44    | 3.05  | 3  | 4   | 885  | 97.4  | 8.05  |

|          |                                                                                                                   |       |    |    |    |     |       |       |       |       |         |       |    |     |      |       |      |
|----------|-------------------------------------------------------------------------------------------------------------------|-------|----|----|----|-----|-------|-------|-------|-------|---------|-------|----|-----|------|-------|------|
| Q9DA69-3 | Isoform 3 of Intraflagellar transport protein 43 homolog OS=Mus musculus GN=Irf43 - [IFT43_MOUSE]                 | 7.77  | 3  | 1  | 1  | 2   | 1.884 | 1.075 | 1.276 | 0.938 | 5.14    | 7.77  | 2  | 2   | 193  | 21.9  | 4.70 |
| P70333   | Heterogeneous nuclear ribonucleoprotein H2 OS=Mus musculus GN=HnmpH2 PE=1 SV=1 - [HNRH2_MOUSE]                    | 42.98 | 3  | 8  | 15 | 190 | 1.064 | 1.030 | 1.157 | 0.938 | 605.84  | 42.98 | 25 | 190 | 449  | 49.2  | 6.30 |
| Q8CDV6-2 | Isoform 2 of Coiled-coil domain-containing protein 63 OS=Mus musculus GN=Ccdc63 - [CCD63_MOUSE]                   | 3.08  | 2  | 1  | 2  | 4   | 1.136 | 1.393 | 0.907 | 0.938 | 8.17    | 3.08  | 3  | 4   | 487  | 56.9  | 7.59 |
| Q8C115-3 | Isoform 3 of Pleckstrin homology domain-containing family H member 2 OS=Mus musculus GN=Plekhh2 - [PLEKHH2_MOUSE] | 1.28  | 3  | 2  | 3  | 9   | 0.948 | 1.029 | 1.124 | 0.938 | 23.79   | 1.28  | 4  | 9   | 1481 | 166.5 | 7.40 |
| Q8C119   | Protein NDNF OS=Mus musculus GN=Ndnf PE=1 SV=2 - [NDNF_MOUSE]                                                     | 1.94  | 1  | 1  | 1  | 1   | 1.142 | 0.910 | 0.992 | 0.938 | 1.87    | 1.94  | 1  | 1   | 568  | 65.0  | 8.97 |
| Q99P72   | Reticulon-4 OS=Mus musculus GN=Rtn4 PE=1 SV=2 - [RTN4_MOUSE]                                                      | 63.68 | 4  | 45 | 51 | 606 | 1.744 | 0.915 | 1.362 | 0.938 | 1820.17 | 63.68 | 87 | 606 | 1162 | 126.5 | 4.54 |
| Q6P2K6   | Serine/threonine-protein phosphatase 4 regulatory subunit 3A OS=Mus musculus GN=Smek1 PE=1 SV=1 - [SMK1_MOUSE]    | 11.95 | 4  | 4  | 7  | 15  | 0.967 | 0.903 | 0.950 | 0.938 | 41.52   | 11.95 | 10 | 15  | 820  | 93.8  | 4.89 |
| Q68FE7   | Transmembrane protein 151B OS=Mus musculus GN=Tmem151b PE=2 SV=1 - [T151B_MOUSE]                                  | 8.73  | 1  | 4  | 4  | 6   | 1.013 | 0.812 | 1.002 | 0.938 | 16.59   | 8.73  | 6  | 6   | 561  | 61.7  | 7.03 |
| Q80Z16-2 | Isoform 2 of Protein zer-1 homolog OS=Mus musculus GN=Zer1 - [ZER1_MOUSE]                                         | 17.75 | 3  | 13 | 14 | 25  | 0.667 | 0.897 | 0.839 | 0.938 | 66.34   | 17.75 | 22 | 25  | 766  | 87.7  | 5.80 |
| Q5RJH6-3 | Isoform 3 of Protein SMG7 OS=Mus musculus GN=Smg7 - [SMG7_MOUSE]                                                  | 5.73  | 3  | 7  | 7  | 13  | 0.992 | 0.819 | 1.029 | 0.939 | 28.86   | 5.73  | 12 | 13  | 1134 | 126.5 | 8.69 |
| Q9CXW3   | Calcyclin-binding protein OS=Mus musculus GN=Cacybp PE=1 SV=1 - [CYBP_MOUSE]                                      | 53.71 | 1  | 10 | 11 | 41  | 1.278 | 0.939 | 0.791 | 0.939 | 106.03  | 53.71 | 18 | 41  | 229  | 26.5  | 7.87 |
| Q5DTZ6-3 | Isoform 3 of RING finger protein 150 OS=Mus musculus GN=Rnf150 - [RN150_MOUSE]                                    | 6.99  | 3  | 2  | 2  | 4   | 0.892 | 1.406 | 1.169 | 0.939 | 12.40   | 6.99  | 3  | 4   | 286  | 31.7  | 8.46 |
| Q8K0C4   | Lanosterol 14-alpha demethylase OS=Mus musculus GN=Cyp51a1 PE=2 SV=1 - [CYP51A1_MOUSE]                            | 32.21 | 1  | 14 | 14 | 68  | 0.735 | 0.396 | 0.709 | 0.939 | 213.97  | 32.21 | 25 | 68  | 503  | 56.7  | 8.41 |
| Q3B807   | Transcription elongation regulator 1-like protein OS=Mus musculus GN=Tcerg1l PE=2 SV=3 - [TCRGL_MOUSE]            | 3.90  | 3  | 2  | 3  | 10  | 1.427 | 1.197 | 1.210 | 0.939 | 16.31   | 3.90  | 4  | 10  | 590  | 66.3  | 9.58 |
| P47753   | F-actin-capping protein subunit alpha-1 OS=Mus musculus GN=Capza1 PE=1 SV=4 - [CAZA1_MOUSE]                       | 54.20 | 1  | 1  | 11 | 111 | 1.904 | 1.548 | 1.132 | 0.939 | 324.25  | 54.20 | 19 | 111 | 286  | 32.9  | 5.55 |
| Q99MP8-2 | Isoform 2 of BRCA1-associated protein OS=Mus musculus GN=Brp - [BRP_MOUSE]                                        | 32.62 | 4  | 12 | 13 | 29  | 1.261 | 0.970 | 1.116 | 0.939 | 75.12   | 32.62 | 21 | 29  | 561  | 63.9  | 5.71 |
| F7CK47   | Microtubule-associated protein (Fragment) OS=Mus musculus GN=Map4 PE=4 SV=1 - [F7CK47_MOUSE]                      | 21.65 | 1  | 1  | 34 | 262 | 2.451 | 1.363 | 1.012 | 0.939 | 670.78  | 21.65 | 63 | 262 | 1441 | 152.7 | 9.28 |
| Q8BR30   | RUN and FYVE domain-containing protein 2 OS=Mus musculus GN=Rufy2 PE=2 SV=1 - [Q8BR30_MOUSE]                      | 35.70 | 4  | 1  | 14 | 49  | 1.666 | 1.152 | 0.977 | 0.939 | 146.02  | 35.70 | 26 | 49  | 437  | 50.2  | 5.47 |
| Q8CF96   | Synaptotagmin VIIbeta OS=Mus musculus GN=Syt7 PE=2 SV=1 - [Q8CF96_MOUSE]                                          | 58.17 | 2  | 5  | 25 | 87  | 0.814 | 1.294 | 1.303 | 0.939 | 249.05  | 58.17 | 43 | 87  | 447  | 50.6  | 9.11 |
| Q04735   | Cyclin-dependent kinase 16 OS=Mus musculus GN=Cdk16 PE=1 SV=1 - [CDK16_MOUSE]                                     | 38.31 | 18 | 9  | 17 | 65  | 0.611 | 0.808 | 1.027 | 0.939 | 161.43  | 38.31 | 28 | 65  | 496  | 55.9  | 7.87 |
| Q3TDT0   | Tripartite motif-containing protein 3 OS=Mus musculus GN=Trim3 PE=2 SV=1 - [Q3TDT0_MOUSE]                         | 47.00 | 5  | 23 | 25 | 126 | 0.639 | 0.784 | 0.954 | 0.939 | 348.48  | 47.00 | 43 | 126 | 717  | 78.2  | 8.16 |
| G5E8B6   | Kin of IRRE like 3 (Drosophila), isoform CRA_b OS=Mus musculus GN=Kirrel3 PE=4 SV=1 - [G5E8B6_MOUSE]              | 20.60 | 5  | 11 | 11 | 21  | 0.991 | 1.164 | 1.108 | 0.939 | 58.83   | 20.60 | 16 | 21  | 733  | 80.4  | 6.93 |
| Q8VEE4   | Replication protein A 70 kDa DNA-binding subunit OS=Mus musculus GN=Rpa1 PE=2 SV=1 - [RFA1_MOUSE]                 | 12.52 | 2  | 7  | 7  | 15  | 0.881 | 0.843 | 0.816 | 0.939 | 36.00   | 12.52 | 11 | 15  | 623  | 69.0  | 7.91 |
| Q62472   | Vomer nasal secretory protein 2 OS=Mus musculus GN=Lcn4 PE=2 SV=1 - [VNS2_MOUSE]                                  | 5.41  | 1  | 1  | 1  | 1   | 1.088 | 1.031 | 1.500 | 0.939 | 0.00    | 5.41  | 1  | 1   | 185  | 21.4  | 5.73 |

|          |                                                                                                           |       |   |    |    |     |       |       |       |       |        |       |    |     |      |       |       |
|----------|-----------------------------------------------------------------------------------------------------------|-------|---|----|----|-----|-------|-------|-------|-------|--------|-------|----|-----|------|-------|-------|
| Q80Z53   | 28S ribosomal protein S26, mitochondrial OS=Mus musculus GN=Mps26 PE=2 SV=1 - [RT26_MOUSE]                | 25.50 | 1 | 4  | 4  | 11  | 0.917 | 0.815 | 1.022 | 0.939 | 28.86  | 25.50 | 8  | 11  | 200  | 23.4  | 9.96  |
| Q9DCB8   | Iron-sulfur cluster assembly 2 homolog, mitochondrial OS=Mus musculus GN=Isca2 PE=2 SV=2 - [ISCA2_MOUSE]  | 50.65 | 1 | 7  | 7  | 39  | 2.038 | 0.884 | 1.164 | 0.939 | 126.38 | 50.65 | 13 | 39  | 154  | 16.7  | 5.60  |
| Q61136   | Serine/threonine-protein kinase PRP4 homolog OS=Mus musculus GN=Pyp4b PE=1 SV=3 - [PRP4B_MOUSE]           | 10.82 | 1 | 8  | 9  | 26  | 0.870 | 1.059 | 0.888 | 0.939 | 53.56  | 10.82 | 13 | 26  | 1007 | 116.9 | 10.23 |
| B2KF50   | Protein Uhrf1bp1 OS=Mus musculus GN=Uhrf1bp1 PE=2 SV=1 - [B2KF50_MOUSE]                                   | 19.94 | 1 | 17 | 21 | 56  | 1.065 | 0.810 | 0.829 | 0.940 | 153.55 | 19.94 | 35 | 56  | 1429 | 156.9 | 6.21  |
| Q8BTV1   | Tumor suppressor candidate 3 OS=Mus musculus GN=Tusc3 PE=2 SV=1 - [TUSC3_MOUSE]                           | 13.54 | 2 | 5  | 6  | 16  | 1.087 | 0.884 | 0.821 | 0.940 | 45.94  | 13.54 | 11 | 16  | 347  | 39.5  | 10.11 |
| G3XA26   | Carbonic anhydrase 7 OS=Mus musculus GN=Car7 PE=4 SV=1 - [G3XA26_MOUSE]                                   | 6.25  | 2 | 1  | 1  | 2   | 1.323 | 1.196 | 1.408 | 0.940 | 4.47   | 6.25  | 2  | 2   | 208  | 23.6  | 7.64  |
| Q8CE20   | Protein 9030612E09Rik OS=Mus musculus GN=9030612E09Rik PE=2 SV=1 - [Q8CE20_MOUSE]                         | 15.00 | 1 | 2  | 2  | 2   | 0.832 | 0.819 | 0.863 | 0.940 | 2.24   | 15.00 | 2  | 2   | 140  | 14.4  | 10.11 |
| Q8BG18   | N-terminal EF-hand calcium-binding protein 1 OS=Mus musculus GN=Necab1 PE=1 SV=1 - [NECA1_MOUSE]          | 32.10 | 1 | 9  | 9  | 39  | 0.560 | 1.554 | 1.532 | 0.940 | 110.87 | 32.10 | 16 | 39  | 352  | 40.9  | 4.89  |
| P20444   | Protein kinase C alpha type OS=Mus musculus GN=Prkca PE=1 SV=3 - [KPCA_MOUSE]                             | 29.02 | 1 | 1  | 19 | 103 | 1.049 | 0.975 | 1.331 | 0.940 | 249.01 | 29.02 | 30 | 103 | 672  | 76.8  | 7.14  |
| D6RHR4   | Protein Snhg11 OS=Mus musculus GN=Snhg11 PE=2 SV=1 - [D6RHR4_MOUSE]                                       | 23.88 | 3 | 1  | 2  | 2   | 0.343 | 1.229 | 1.084 | 0.940 | 1.71   | 23.88 | 2  | 2   | 67   | 7.4   | 10.17 |
| Q8K2Y3   | Protein eva-1 homolog B OS=Mus musculus GN=Eva1b PE=2 SV=1 - [EVA1B_MOUSE]                                | 13.41 | 1 | 1  | 1  | 4   | 0.872 | 1.307 | 0.760 | 0.940 | 20.16  | 13.41 | 2  | 4   | 164  | 18.3  | 4.68  |
| Q8C788   | Sorting nexin 18 OS=Mus musculus GN=Snx18 PE=2 SV=1 - [Q8C788_MOUSE]                                      | 17.56 | 2 | 9  | 9  | 39  | 1.461 | 1.002 | 0.901 | 0.940 | 113.65 | 17.56 | 16 | 39  | 615  | 67.7  | 6.46  |
| Q3TXX3-2 | Isoform 2 of Protrudin OS=Mus musculus GN=Zfyve27 - [ZFY27_MOUSE]                                         | 7.11  | 3 | 2  | 2  | 8   | 0.642 | 0.596 | 0.923 | 0.940 | 26.13  | 7.11  | 4  | 8   | 408  | 45.4  | 5.35  |
| A2AKQ8   | Tetratricopeptide repeat protein 30A2 OS=Mus musculus GN=Ttc30a2 PE=2 SV=1 - [T30A2_MOUSE]                | 9.49  | 1 | 5  | 6  | 7   | 0.494 | 0.909 | 0.716 | 0.940 | 15.14  | 9.49  | 7  | 7   | 664  | 76.1  | 5.16  |
| Q8BR90   | UPF0600 protein C5orf51 homolog OS=Mus musculus PE=2 SV=1 - [CE051_MOUSE]                                 | 28.91 | 2 | 8  | 8  | 27  | 0.637 | 1.163 | 0.868 | 0.940 | 81.92  | 28.91 | 14 | 27  | 294  | 33.4  | 5.19  |
| Q91VD1   | Galectin-12 OS=Mus musculus GN=Lgals12 PE=1 SV=2 [LEG12_MOUSE]                                            | 8.60  | 7 | 2  | 2  | 2   | 1.520 | 0.854 | 0.975 | 0.940 | 5.73   | 8.60  | 2  | 2   | 314  | 35.4  | 8.60  |
| D3Z601   | Calsyntenin-3 OS=Mus musculus GN=Cstn3 PE=2 SV=1 - [D3Z601_MOUSE]                                         | 11.10 | 2 | 10 | 10 | 34  | 1.016 | 0.857 | 0.854 | 0.940 | 84.31  | 11.10 | 16 | 34  | 919  | 101.7 | 5.27  |
| O88325   | Alpha-N-acetylglucosaminidase OS=Mus musculus GN=Naglu PE=2 SV=1 - [NAGLU_MOUSE]                          | 15.29 | 1 | 8  | 8  | 13  | 1.984 | 1.104 | 1.035 | 0.940 | 47.23  | 15.29 | 12 | 13  | 739  | 82.5  | 6.61  |
| Q9WW32   | Actin-related protein 2/3 complex subunit 1B OS=Mus musculus GN=Arpc1b PE=1 SV=4 - [ARPC1B_MOUSE]         | 27.42 | 4 | 8  | 8  | 19  | 1.721 | 0.969 | 1.124 | 0.940 | 64.04  | 27.42 | 13 | 19  | 372  | 41.0  | 8.35  |
| P67871   | Casein kinase II subunit beta OS=Mus musculus GN=Csk2b PE=1 SV=1 - [CSK2B_MOUSE]                          | 44.65 | 7 | 8  | 8  | 52  | 1.331 | 1.122 | 0.967 | 0.940 | 161.05 | 44.65 | 14 | 52  | 215  | 24.9  | 5.55  |
| Q9JL8    | Serine-tRNA ligase, mitochondrial OS=Mus musculus GN=Sars2 PE=2 SV=2 - [SYSM_MOUSE]                       | 37.07 | 1 | 14 | 14 | 54  | 0.843 | 0.940 | 0.889 | 0.940 | 158.59 | 37.07 | 24 | 54  | 518  | 58.3  | 7.90  |
| Q9CQAS-2 | Isoform 2 of Mediator of RNA polymerase II transcription subunit 4 OS=Mus musculus GN=Med4 - [MED4_MOUSE] | 25.99 | 2 | 4  | 4  | 7   | 1.479 | 1.077 | 0.932 | 0.940 | 22.76  | 25.99 | 7  | 7   | 177  | 19.9  | 6.57  |
| Q3UCV8   | Ubiquitin thioesterase otulin OS=Mus musculus GN=Fam105b PE=1 SV=1 - [OTUL_MOUSE]                         | 14.77 | 1 | 6  | 6  | 10  | 0.356 | 1.595 | 0.828 | 0.940 | 15.18  | 14.77 | 9  | 10  | 352  | 40.3  | 5.68  |
| Q9CQT0   | MCG22296, isoform CRA_b OS=Mus musculus GN=Ttg11 PE=2 SV=1 - [Q9CQT0_MOUSE]                               | 7.56  | 2 | 2  | 2  | 3   | 0.646 | 1.105 | 0.876 | 0.940 | 5.44   | 7.56  | 3  | 3   | 238  | 28.0  | 7.11  |
| Q8VCY8-2 | Isoform 2 of Lipid phosphate phosphatase-related protein type 2 OS=Mus musculus GN=Lppr2 - [LPPR2_MOUSE]  | 12.83 | 2 | 4  | 4  | 21  | 0.382 | 1.650 | 1.350 | 0.941 | 85.04  | 12.83 | 7  | 21  | 452  | 48.4  | 9.45  |

|        |                                                                                                                                      |       |   |    |    |     |       |       |       |       |         |       |    |     |      |       |       |
|--------|--------------------------------------------------------------------------------------------------------------------------------------|-------|---|----|----|-----|-------|-------|-------|-------|---------|-------|----|-----|------|-------|-------|
| Q69Z57 | HBS1-like protein OS=Mus musculus GN=Hbs1 PE=1 SV=2 - [HBS1L_MOUSE]                                                                  | 32.26 | 3 | 11 | 17 | 38  | 1.152 | 0.740 | 0.862 | 0.941 | 115.55  | 32.26 | 29 | 38  | 682  | 75.1  | 6.46  |
| Q7TSF4 | Leucine-rich repeat-containing protein FAM211A OS=Mus musculus GN=Fam211a PE=1 SV=1 - [FAM211A_MOUSE]                                | 15.04 | 2 | 3  | 3  | 5   | 0.721 | 0.882 | 1.141 | 0.941 | 14.23   | 15.04 | 4  | 5   | 339  | 37.6  | 8.76  |
| Q80Y61 | Brain-specific angiogenesis inhibitor 1-associated protein 2-like protein 2 OS=Mus musculus GN=Baiap2l2 PE=1 SV=1 - [BAIAP2L2_MOUSE] | 4.21  | 1 | 2  | 2  | 3   | 0.926 | 1.640 | 1.768 | 0.941 | 4.86    | 4.21  | 3  | 3   | 522  | 58.4  | 9.50  |
| Q6NZM9 | Histone deacetylase 4 OS=Mus musculus GN=Hdac4 PE=1 SV=1 - [HDAC4_MOUSE]                                                             | 18.31 | 2 | 16 | 17 | 50  | 1.375 | 0.993 | 1.029 | 0.941 | 140.90  | 18.31 | 29 | 50  | 1076 | 118.5 | 6.92  |
| Q8VEH8 | Endoplasmic reticulum lectin 1 OS=Mus musculus GN=Erlec1 PE=2 SV=1 - [ERLEC_MOUSE]                                                   | 31.47 | 3 | 12 | 12 | 25  | 1.014 | 0.945 | 0.851 | 0.941 | 69.34   | 31.47 | 18 | 25  | 483  | 54.9  | 6.25  |
| Q91VC3 | Eukaryotic initiation factor 4A-III OS=Mus musculus GN=EIF4a3 PE=2 SV=3 - [EIF4A3_MOUSE]                                             | 54.50 | 3 | 19 | 22 | 84  | 0.617 | 0.850 | 0.832 | 0.941 | 258.05  | 54.50 | 39 | 84  | 411  | 46.8  | 6.73  |
| Q3TJ55 | Syntaxin-2 OS=Mus musculus GN=Sb2 PE=2 SV=1 - [Q3TJ55_MOUSE]                                                                         | 20.49 | 4 | 5  | 7  | 42  | 0.944 | 0.836 | 0.837 | 0.941 | 82.69   | 20.49 | 10 | 42  | 288  | 33.2  | 6.21  |
| Q6P6J9 | Thioredoxin domain-containing protein 15 OS=Mus musculus GN=Txd15 PE=1 SV=1 - [TXD15_MOUSE]                                          | 8.72  | 1 | 2  | 2  | 6   | 1.511 | 1.508 | 0.957 | 0.941 | 22.80   | 8.72  | 4  | 6   | 344  | 38.1  | 4.77  |
| P83882 | 60S ribosomal protein L36a OS=Mus musculus GN=Rpl36a PE=2 SV=2 - [RL36A_MOUSE]                                                       | 23.58 | 1 | 3  | 3  | 14  | 0.964 | 1.219 | 0.903 | 0.941 | 31.96   | 23.58 | 6  | 14  | 106  | 12.4  | 10.58 |
| P69566 | Ran-binding protein 9 OS=Mus musculus GN=Ranbp9 PE=1 SV=1 - [RANB9_MOUSE]                                                            | 22.05 | 3 | 12 | 12 | 35  | 0.926 | 1.280 | 0.942 | 0.941 | 105.71  | 22.05 | 20 | 35  | 653  | 71.0  | 6.84  |
| Q3ZK22 | Vezatin OS=Mus musculus GN=Vezt PE=1 SV=2 - [VF7A_MOUSE]                                                                             | 13.33 | 8 | 8  | 9  | 27  | 0.834 | 1.413 | 1.242 | 0.941 | 83.71   | 13.33 | 16 | 27  | 780  | 87.9  | 5.20  |
| Q6VN19 | Ran-binding protein 10 OS=Mus musculus GN=Ranbp10 PE=1 SV=2 - [RBP10_MOUSE]                                                          | 14.68 | 1 | 6  | 6  | 13  | 0.800 | 1.086 | 0.847 | 0.941 | 36.67   | 14.68 | 10 | 13  | 620  | 67.1  | 6.58  |
| Q8C0Q2 | Zinc fingers and homeobox protein 3 OS=Mus musculus GN=Zfx3 PE=2 SV=2 - [ZFX3_MOUSE]                                                 | 9.46  | 1 | 6  | 6  | 14  | 1.555 | 0.980 | 1.124 | 0.941 | 46.23   | 9.46  | 10 | 14  | 951  | 104.3 | 6.57  |
| O70480 | Vesicle-associated membrane protein 4 OS=Mus musculus GN=Vamp4 PE=1 SV=1 - [VAMP4_MOUSE]                                             | 28.37 | 2 | 3  | 3  | 20  | 1.064 | 1.091 | 0.757 | 0.941 | 75.70   | 28.37 | 4  | 20  | 141  | 16.3  | 7.36  |
| Q9EQT6 | Synaptotagmin-13 OS=Mus musculus GN=Sytl3 PE=1 SV=1 - [SYT13_MOUSE]                                                                  | 10.56 | 1 | 4  | 4  | 13  | 0.622 | 1.441 | 0.963 | 0.941 | 33.87   | 10.56 | 7  | 13  | 426  | 46.8  | 7.53  |
| Q7M6Z4 | Kinesin-like protein KIF27 OS=Mus musculus GN=Kif27 PE=1 SV=1 - [KIF27_MOUSE]                                                        | 2.87  | 2 | 2  | 5  | 14  | 1.170 | 0.665 | 0.985 | 0.941 | 39.42   | 2.87  | 7  | 14  | 1394 | 158.9 | 7.14  |
| Q80WQ2 | Protein VAC14 homolog OS=Mus musculus GN=Vac14 PE=1 SV=1 - [VAC14_MOUSE]                                                             | 27.37 | 1 | 15 | 16 | 55  | 0.647 | 1.079 | 0.892 | 0.941 | 161.93  | 27.37 | 24 | 55  | 782  | 88.0  | 6.13  |
| Q9QUM9 | Proteasome subunit alpha type-6 OS=Mus musculus GN=Psm6 PE=1 SV=1 - [PSA6_MOUSE]                                                     | 51.22 | 3 | 12 | 12 | 118 | 1.789 | 1.024 | 0.811 | 0.941 | 355.52  | 51.22 | 22 | 118 | 246  | 27.4  | 6.76  |
| Q8BJD1 | Inter-alpha-trypsin inhibitor heavy chain H5 OS=Mus musculus GN=Ith5 PE=2 SV=1 - [ITH5_MOUSE]                                        | 7.04  | 1 | 6  | 6  | 14  | 1.254 | 1.307 | 0.867 | 0.941 | 33.93   | 7.04  | 10 | 14  | 952  | 106.7 | 8.16  |
| Q6A0D4 | Raftin OS=Mus musculus GN=Rftn1 PE=1 SV=4 - [RFTN1_MOUSE]                                                                            | 29.06 | 2 | 12 | 12 | 39  | 0.757 | 0.408 | 0.593 | 0.941 | 132.73  | 29.06 | 20 | 39  | 554  | 61.5  | 7.68  |
| Q3UUG3 | Protein FAM91A1 OS=Mus musculus GN=Fam91a1 PE=1 SV=1 - [F91A1_MOUSE]                                                                 | 19.35 | 1 | 13 | 14 | 35  | 0.527 | 0.941 | 0.771 | 0.942 | 97.25   | 19.35 | 23 | 35  | 837  | 93.4  | 6.35  |
| Q9C283 | 39S ribosomal protein L55, mitochondrial OS=Mus musculus GN=Mpl55 PE=2 SV=1 - [RM55_MOUSE]                                           | 11.81 | 2 | 2  | 2  | 3   | 1.508 | 1.417 | 0.894 | 0.942 | 8.70    | 11.81 | 2  | 3   | 127  | 15.1  | 10.51 |
| F7BJK1 | Protein Pcdh1 (Fragment) OS=Mus musculus GN=Pcdh1 PE=2 SV=1 - [F7BJK1_MOUSE]                                                         | 39.09 | 1 | 4  | 27 | 179 | 1.053 | 1.829 | 1.583 | 0.942 | 559.98  | 39.09 | 47 | 179 | 1077 | 116.4 | 5.08  |
| Q60864 | Stress-induced-phosphoprotein 1 OS=Mus musculus GN=Stip1 PE=1 SV=1 - [STIP1_MOUSE]                                                   | 61.51 | 1 | 41 | 41 | 524 | 1.684 | 0.815 | 1.282 | 0.942 | 1336.43 | 61.51 | 73 | 524 | 543  | 62.5  | 6.80  |
| Q01721 | Growth arrest-specific protein 1 OS=Mus musculus GN=Gas1 PE=2 SV=2 - [GAS1_MOUSE]                                                    | 8.16  | 1 | 2  | 2  | 4   | 0.897 | 0.688 | 0.743 | 0.942 | 10.39   | 8.16  | 3  | 4   | 343  | 35.7  | 6.04  |
| Q149L6 | DnaJ homolog subfamily B member 14 OS=Mus musculus GN=Dnajb14 PE=2 SV=1 - [DNAJB14_MOUSE]                                            | 21.90 | 3 | 8  | 8  | 28  | 0.895 | 0.834 | 0.848 | 0.942 | 69.52   | 21.90 | 16 | 28  | 379  | 42.3  | 8.59  |

|          |                                                                                                                      |       |    |    |    |     |       |       |       |       |        |       |    |     |      |       |      |
|----------|----------------------------------------------------------------------------------------------------------------------|-------|----|----|----|-----|-------|-------|-------|-------|--------|-------|----|-----|------|-------|------|
| Q61609   | Sodium-dependent phosphate transporter 1<br>OS=Mus musculus<br>GN=Slc20a1 PE=1 SV=1 - [S20A1_MOUSE]                  | 6.61  | 1  | 3  | 5  | 12  | 0.898 | 0.805 | 0.952 | 0.942 | 26.88  | 6.61  | 8  | 12  | 681  | 74.1  | 6.89 |
| Q9CQ49   | Cancer-related nucleoside-triphosphatase homolog<br>OS=Mus musculus<br>GN=Ntpcr PE=2 SV=1 - [NTPCR_MOUSE]            | 30.00 | 4  | 5  | 5  | 11  | 0.725 | 0.905 | 0.800 | 0.942 | 29.15  | 30.00 | 8  | 11  | 190  | 20.7  | 9.72 |
| Q9ER64   | Oxysterol-binding protein-related protein 5<br>OS=Mus musculus<br>GN=Osbp5 PE=2 SV=3 - [OSBLS_MOUSE]                 | 2.29  | 2  | 1  | 2  | 6   | 1.160 | 0.607 | 0.857 | 0.942 | 19.50  | 2.29  | 4  | 6   | 874  | 98.9  | 7.44 |
| Q9WV04   | Kinesin-like protein KIF9<br>OS=Mus musculus<br>GN=Kif9 PE=2 SV=2 - [KIF9_MOUSE]                                     | 3.92  | 5  | 1  | 3  | 5   | 0.167 | 1.493 | 1.092 | 0.942 | 11.71  | 3.92  | 4  | 5   | 790  | 89.8  | 6.86 |
| Q8R3L2   | Transcription factor 25<br>OS=Mus musculus<br>GN=Tcf25 PE=1 SV=2 - [TCF25_MOUSE]                                     | 15.38 | 4  | 2  | 7  | 20  | 0.969 | 1.030 | 0.781 | 0.942 | 46.15  | 15.38 | 13 | 20  | 676  | 76.6  | 6.51 |
| A2A728   | Arylamide deacetylase-like 3<br>OS=Mus musculus<br>GN=Aadac3 PE=3 SV=1 - [ADCL3_MOUSE]                               | 3.92  | 1  | 1  | 1  | 1   | 1.002 | 1.160 | 1.250 | 0.942 | 0.00   | 3.92  | 1  | 1   | 408  | 46.3  | 8.28 |
| Q3UZ39-2 | Isoform 2 of Leucine-rich repeat flightless-interacting protein 1<br>OS=Mus musculus<br>GN=Lrrfip1 - [LRRFIP1_MOUSE] | 28.82 | 3  | 6  | 18 | 54  | 1.693 | 0.867 | 1.611 | 0.942 | 164.00 | 28.82 | 27 | 54  | 628  | 71.3  | 6.04 |
| O88559-2 | Isoform 2 of Menin<br>OS=Mus musculus<br>GN=Men1 - [MEN1_MOUSE]                                                      | 3.96  | 5  | 2  | 2  | 4   | 0.504 | 0.825 | 0.861 | 0.942 | 5.78   | 3.96  | 3  | 4   | 556  | 61.4  | 6.62 |
| Q505H4-3 | Isoform 3 of von Willebrand factor C domain containing protein 2-like<br>OS=Mus musculus<br>GN=Vwc2l - [VWC2L_MOUSE] | 8.73  | 3  | 1  | 1  | 1   | 1.352 | 0.672 | 1.403 | 0.942 | 3.90   | 8.73  | 1  | 1   | 126  | 14.3  | 6.84 |
| Q3UH45   | Protein Tecpr2<br>OS=Mus musculus<br>GN=Tecpr2 PE=2 SV=1 - [Q3UH45_MOUSE]                                            | 2.95  | 1  | 4  | 4  | 7   | 1.289 | 0.916 | 1.376 | 0.942 | 24.09  | 2.95  | 5  | 7   | 1423 | 154.8 | 5.38 |
| Q8BGA9   | Mitochondrial inner membrane protein OXA1L<br>OS=Mus musculus<br>GN=Oxa1l PE=2 SV=1 - [OXA1L_MOUSE]                  | 8.31  | 1  | 4  | 4  | 12  | 0.743 | 0.815 | 0.883 | 0.942 | 23.42  | 8.31  | 6  | 12  | 433  | 48.2  | 9.61 |
| Q9QYA2   | Mitochondrial import receptor subunit TOM40 homolog<br>OS=Mus musculus<br>GN=Tomm40 PE=1 SV=3 - [TOMM40_MOUSE]       | 45.43 | 2  | 10 | 10 | 98  | 0.793 | 0.850 | 0.873 | 0.942 | 324.44 | 45.43 | 18 | 98  | 361  | 37.9  | 7.74 |
| Q5PPR2   | Exocyst complex component 1<br>OS=Mus musculus<br>GN=Exoc1 PE=2 SV=1 - [Q5PPR2_MOUSE]                                | 33.33 | 2  | 1  | 25 | 82  | 0.540 | 1.305 | 1.627 | 0.942 | 220.56 | 33.33 | 44 | 82  | 879  | 100.1 | 6.52 |
| Q8CSU9   | Ubiquitin-3<br>OS=Mus musculus<br>GN=Ubqln3 PE=2 SV=1 - [UBQL3_MOUSE]                                                | 3.04  | 1  | 1  | 2  | 13  | 1.642 | 0.972 | 0.902 | 0.942 | 15.35  | 3.04  | 4  | 13  | 658  | 70.7  | 6.43 |
| Q8VBZ3   | Cleft lip and palate transmembrane protein 1 homolog<br>OS=Mus musculus<br>GN=Ciptm1 PE=1 SV=1 - [CIPTM1_MOUSE]      | 25.60 | 1  | 12 | 12 | 52  | 0.806 | 0.737 | 0.883 | 0.942 | 170.78 | 25.60 | 20 | 52  | 664  | 75.2  | 6.30 |
| Q9ERE9   | C-Jun-amino-terminal kinase-interacting protein 2<br>OS=Mus musculus<br>GN=Mapk8ip2 PE=1 SV=1 - [IIP2_MOUSE]         | 7.47  | 1  | 4  | 4  | 23  | 1.616 | 0.947 | 0.913 | 0.942 | 65.55  | 7.47  | 8  | 23  | 830  | 89.8  | 4.42 |
| Q8R007   | Poliovirus receptor-related protein 4<br>OS=Mus musculus<br>GN=Pvr4 PE=1 SV=1 - [PVR4_MOUSE]                         | 1.77  | 2  | 1  | 1  | 1   | 1.349 | 1.360 | 1.586 | 0.942 | 0.00   | 1.77  | 1  | 1   | 508  | 55.6  | 5.34 |
| Q9D0G0   | 28S ribosomal protein S30, mitochondrial<br>OS=Mus musculus<br>GN=Mps30 PE=2 SV=1 - [RT30_MOUSE]                     | 24.21 | 1  | 7  | 7  | 21  | 0.854 | 0.711 | 0.899 | 0.942 | 51.87  | 24.21 | 11 | 21  | 442  | 49.9  | 9.38 |
| Q9JKN6   | RNA-binding protein Nova-1<br>OS=Mus musculus<br>GN=Nova1 PE=1 SV=2 - [NOVA1_MOUSE]                                  | 50.89 | 1  | 15 | 22 | 120 | 1.313 | 0.417 | 0.715 | 0.942 | 348.75 | 50.89 | 43 | 120 | 507  | 51.7  | 8.72 |
| Q9D7S9   | Charged multivesicular body protein 5<br>OS=Mus musculus<br>GN=Chmp5 PE=2 SV=1 - [CHMP5_MOUSE]                       | 32.88 | 1  | 7  | 7  | 31  | 1.143 | 0.666 | 1.229 | 0.943 | 85.00  | 32.88 | 11 | 31  | 219  | 24.6  | 4.79 |
| Q6PHP6   | Leucine rich repeat protein 2, neuronal<br>OS=Mus musculus<br>GN=Lrrm2 PE=2 SV=1 - [Q6PHP6_MOUSE]                    | 2.05  | 1  | 1  | 1  | 1   | 2.006 | 1.142 | 1.180 | 0.943 | 0.00   | 2.05  | 1  | 1   | 730  | 81.1  | 7.97 |
| A2AEW8   | GRIP1-associated protein 1<br>OS=Mus musculus<br>GN=Gripap1 PE=2 SV=1 - [A2AEW8_MOUSE]                               | 65.35 | 7  | 52 | 53 | 235 | 1.751 | 1.097 | 1.458 | 0.943 | 678.65 | 65.35 | 89 | 235 | 837  | 95.9  | 5.17 |
| Q9CW03   | Structural maintenance of chromosomes protein 3<br>OS=Mus musculus<br>GN=Smc3 PE=1 SV=2 - [SMC3_MOUSE]               | 35.99 | 2  | 38 | 41 | 117 | 0.862 | 1.004 | 0.815 | 0.943 | 330.10 | 35.99 | 66 | 117 | 1217 | 141.5 | 7.18 |
| Q6DICO   | Probable global transcription activator SNF2L2<br>OS=Mus musculus<br>GN=Smarca2 PE=1 SV=1 - [SMCA2_MOUSE]            | 12.37 | 12 | 10 | 18 | 46  | 0.708 | 1.082 | 0.999 | 0.943 | 140.89 | 12.37 | 30 | 46  | 1577 | 180.1 | 7.20 |



|          |                                                                                                                     |       |    |    |    |     |        |       |       |       |         |       |    |     |      |       |       |
|----------|---------------------------------------------------------------------------------------------------------------------|-------|----|----|----|-----|--------|-------|-------|-------|---------|-------|----|-----|------|-------|-------|
| Q78T81   | Protein FAM102A OS=Mus musculus GN=Fam102a PE=1 SV=1 - [F102A_MOUSE]                                                | 23.47 | 1  | 7  | 7  | 31  | 0.734  | 0.824 | 1.119 | 0.943 | 111.51  | 23.47 | 11 | 31  | 392  | 42.8  | 8.56  |
| Q91YE3   | Egl nine homolog 1 OS=Mus musculus GN=Egln1 PE=2 SV=2 - [EGLN1_MOUSE]                                               | 8.50  | 1  | 3  | 3  | 8   | 1.696  | 0.860 | 1.232 | 0.943 | 16.15   | 8.50  | 5  | 8   | 400  | 43.1  | 8.29  |
| Q8K4D7   | 1-phosphatidylinositol 4,5-bisphosphate phosphodiesterase zeta-1 OS=Mus musculus GN=Plcz1 PE=1 SV=1 - [PLCZ1_MOUSE] | 1.85  | 1  | 1  | 1  | 2   | 37.377 | 1.229 | 2.071 | 0.943 | 2.37    | 1.85  | 1  | 2   | 647  | 74.6  | 5.63  |
| H3BJP5   | POU domain class 2, transcription factor 1 (Fragment) OS=Mus musculus GN=Pou2f1 PE=2 SV=1 - [POU2F1_MOUSE]          | 39.13 | 17 | 1  | 1  | 1   | 1.047  | 1.038 | 1.194 | 0.943 | 1.66    | 39.13 | 1  | 1   | 23   | 2.5   | 4.91  |
| O54946-2 | Isoform 8 of DnaJ homolog subfamily B member 6 OS=Mus musculus GN=Dnajb6 - [DNJB6_MOUSE]                            | 40.50 | 3  | 2  | 10 | 35  | 0.839  | 1.607 | 1.101 | 0.943 | 90.40   | 40.50 | 16 | 35  | 242  | 27.0  | 7.61  |
| E9Q412   | Protein Brd1 OS=Mus musculus GN=Brd1 PE=2 SV=1 - [E9Q412_MOUSE]                                                     | 1.04  | 3  | 1  | 1  | 1   | 1.190  | 0.923 | 1.034 | 0.943 | 1.86    | 1.04  | 1  | 1   | 867  | 98.9  | 8.68  |
| P62196   | 26S protease regulatory subunit 8 OS=Mus musculus GN=Psmc5 PE=1 SV=1 - [P62196_MOUSE]                               | 67.73 | 2  | 27 | 29 | 142 | 0.946  | 1.142 | 0.887 | 0.943 | 396.66  | 67.73 | 49 | 142 | 406  | 45.6  | 7.55  |
| Q8BG32   | 26S proteasome non-ATPase regulatory subunit 11 OS=Mus musculus GN=Psm11 PE=1 SV=3 - [PSD11_MOUSE]                  | 66.82 | 8  | 8  | 26 | 116 | 0.732  | 1.047 | 0.855 | 0.943 | 371.49  | 66.82 | 45 | 116 | 422  | 47.4  | 6.48  |
| Q9QXV8   | Protein sprouty homolog 2 OS=Mus musculus GN=Spry2 PE=2 SV=1 - [SPRY2_MOUSE]                                        | 22.86 | 1  | 5  | 5  | 20  | 1.073  | 0.944 | 1.094 | 0.943 | 54.73   | 22.86 | 10 | 20  | 315  | 34.6  | 8.29  |
| P26041   | Moesin OS=Mus musculus GN=Msn PE=1 SV=3 - [MOES_MOUSE]                                                              | 42.46 | 1  | 19 | 29 | 126 | 1.446  | 0.864 | 0.944 | 0.943 | 337.49  | 42.46 | 50 | 126 | 577  | 67.7  | 6.60  |
| Q9JLL3   | Tumor necrosis factor receptor superfamily member 19 OS=Mus musculus GN=Tnfrsf19 PE=2 SV=2 - [TNFRSF19_MOUSE]       | 7.45  | 2  | 2  | 2  | 12  | 1.646  | 0.960 | 0.974 | 0.943 | 0.00    | 7.45  | 2  | 12  | 416  | 45.2  | 5.82  |
| Q3UFB2   | Box C/D snoRNA protein 1 OS=Mus musculus GN=Znhit6 PE=2 SV=2 - [BCD1_MOUSE]                                         | 12.61 | 2  | 3  | 3  | 5   | 0.990  | 1.617 | 0.915 | 0.943 | 9.16    | 12.61 | 3  | 5   | 460  | 52.2  | 5.57  |
| P56812   | Programmed cell death protein 5 OS=Mus musculus GN=Pcd5 PE=1 SV=3 - [PCD5_MOUSE]                                    | 53.97 | 2  | 7  | 7  | 64  | 1.659  | 1.003 | 1.264 | 0.943 | 174.49  | 53.97 | 13 | 64  | 126  | 14.3  | 5.68  |
| Q32NY4   | Metal transporter CNNM3 OS=Mus musculus GN=Cnm3 PE=1 SV=2 - [CNNM3_MOUSE]                                           | 19.21 | 2  | 11 | 14 | 39  | 1.204  | 1.172 | 0.975 | 0.944 | 109.72  | 19.21 | 25 | 39  | 713  | 76.2  | 5.58  |
| O54818   | Tumor protein D53 OS=Mus musculus GN=Tpd52l1 PE=2 SV=1 - [TPD53_MOUSE]                                              | 40.69 | 1  | 8  | 8  | 17  | 0.739  | 1.368 | 1.102 | 0.944 | 49.60   | 40.69 | 11 | 17  | 204  | 22.5  | 6.21  |
| Q9CZB0   | Succinate dehydrogenase cytochrome b560 subunit, mitochondrial OS=Mus musculus GN=Sdhc PE=2 SV=1 - [C560_MOUSE]     | 14.20 | 3  | 2  | 2  | 8   | 0.768  | 0.986 | 0.929 | 0.944 | 16.33   | 14.20 | 3  | 8   | 169  | 18.4  | 9.94  |
| G3UYG5   | Potassium voltage-gated channel subfamily KQT member 5 OS=Mus musculus GN=Kcnq5 PE=2 SV=1 - [G3UYG5_MOUSE]          | 5.30  | 5  | 3  | 4  | 10  | 1.409  | 0.953 | 1.663 | 0.944 | 22.39   | 5.30  | 7  | 10  | 924  | 101.3 | 9.50  |
| P53995   | Anaphase-promoting complex subunit 1 OS=Mus musculus GN=Anapc1 PE=1 SV=2 - [APC1_MOUSE]                             | 15.07 | 3  | 21 | 21 | 54  | 0.756  | 0.962 | 0.898 | 0.944 | 156.58  | 15.07 | 35 | 54  | 1944 | 215.9 | 6.35  |
| O88796   | Ribonuclease P protein subunit p30 OS=Mus musculus GN=Rpp30 PE=2 SV=1 - [RPP30_MOUSE]                               | 3.36  | 1  | 1  | 1  | 1   | 1.232  | 0.651 | 0.894 | 0.944 | 2.93    | 3.36  | 1  | 1   | 268  | 29.5  | 9.06  |
| Q9R060   | Cytosolic Fe-S cluster assembly factor NUBP1 OS=Mus musculus GN=Nubp1 PE=1 SV=1 - [NUBP1_MOUSE]                     | 14.69 | 1  | 3  | 3  | 9   | 1.205  | 0.972 | 1.051 | 0.944 | 39.15   | 14.69 | 6  | 9   | 320  | 34.1  | 5.90  |
| P68254-2 | Isoform 2 of 14-3-3 protein theta OS=Mus musculus GN=Ywhaq - [1433T_MOUSE]                                          | 66.67 | 5  | 15 | 21 | 775 | 0.925  | 1.018 | 0.904 | 0.944 | 2169.88 | 66.67 | 36 | 775 | 243  | 27.7  | 4.93  |
| Q8K3K8   | Optineurin OS=Mus musculus GN=Optn PE=1 SV=1 - [OPTN_MOUSE]                                                         | 24.49 | 1  | 13 | 13 | 36  | 2.256  | 0.907 | 1.038 | 0.944 | 93.48   | 24.49 | 25 | 36  | 584  | 67.0  | 5.26  |
| Q8C0I2-2 | Isoform 2 of Autophagy-related protein 16-1 OS=Mus musculus GN=Atg16l1 - [ATG16L1_MOUSE]                            | 30.61 | 8  | 13 | 14 | 38  | 1.221  | 0.984 | 1.030 | 0.944 | 85.24   | 30.61 | 24 | 38  | 588  | 66.2  | 6.29  |
| P35278   | Ras-related protein Rab-5C OS=Mus musculus GN=Rab5c PE=1 SV=2 - [RAB5C_MOUSE]                                       | 65.74 | 4  | 7  | 11 | 62  | 0.797  | 0.984 | 0.854 | 0.944 | 176.20  | 65.74 | 19 | 62  | 216  | 23.4  | 8.41  |
| P62242   | 40S ribosomal protein S8 OS=Mus musculus GN=Rps8 PE=1 SV=2 - [RS8_MOUSE]                                            | 39.90 | 1  | 8  | 8  | 35  | 0.623  | 0.807 | 0.772 | 0.944 | 100.24  | 39.90 | 13 | 35  | 208  | 24.2  | 10.32 |

|          |                                                                                                                     |       |   |    |    |     |       |       |       |       |        |       |    |     |      |       |      |
|----------|---------------------------------------------------------------------------------------------------------------------|-------|---|----|----|-----|-------|-------|-------|-------|--------|-------|----|-----|------|-------|------|
| Q61672   | Equilibrative nucleoside transporter 2 OS=Mus musculus GN=Slc29a2 PE=1 SV=2 -                                       | 2.63  | 1 | 1  | 1  | 5   | 0.723 | 0.555 | 0.859 | 0.944 | 11.72  | 2.63  | 2  | 5   | 456  | 50.2  | 6.51 |
| Q3UHY7   | Coiled-coil domain containing 32 OS=Mus musculus GN=Ccdc32 PE=2 SV=1 -                                              | 37.99 | 3 | 4  | 4  | 11  | 1.289 | 0.757 | 1.326 | 0.944 | 32.43  | 37.99 | 7  | 11  | 179  | 19.8  | 4.78 |
| H3BL05   | Zinc finger protein 428 (Fragment) OS=Mus musculus GN=Zfp428 PE=2 SV=1 -                                            | 31.37 | 3 | 3  | 3  | 15  | 1.514 | 0.924 | 1.210 | 0.944 | 55.18  | 31.37 | 6  | 15  | 153  | 16.3  | 4.21 |
| O35405   | Phospholipase D3 OS=Mus musculus GN=Pld3 PE=2 SV=1 - [PLD3_MOUSE]                                                   | 25.82 | 4 | 10 | 11 | 36  | 0.709 | 1.381 | 1.117 | 0.944 | 111.62 | 25.82 | 19 | 36  | 488  | 54.4  | 6.52 |
| Q99M31   | Heat shock 70 kDa protein 14 OS=Mus musculus GN=Hspa14 PE=2 SV=2 - [HSP7E_MOUSE]                                    | 17.49 | 5 | 7  | 8  | 18  | 1.240 | 1.085 | 0.885 | 0.944 | 53.20  | 17.49 | 12 | 18  | 509  | 54.6  | 5.92 |
| E0CY30   | MOB-like protein phocein (Fragment) OS=Mus musculus GN=Mob4 PE=2 SV=1 - [E0CY30_MOUSE]                              | 41.94 | 4 | 7  | 7  | 24  | 1.209 | 1.114 | 1.009 | 0.944 | 76.63  | 41.94 | 11 | 24  | 186  | 21.6  | 6.51 |
| Q9DC16   | Endoplasmic reticulum-Golgi intermediate compartment protein 1 OS=Mus musculus GN=Ergic1 PE=1 SV=1 - [ERGIC1_MOUSE] | 33.45 | 3 | 8  | 8  | 33  | 0.706 | 1.035 | 0.765 | 0.944 | 110.47 | 33.45 | 15 | 33  | 290  | 32.5  | 7.06 |
| Q6P851   | Coiled-coil domain-containing protein 117 OS=Mus musculus GN=Ccdc117 PE=2 SV=1 - [CC117_MOUSE]                      | 3.97  | 1 | 1  | 1  | 2   | 1.215 | 0.971 | 1.039 | 0.944 | 3.45   | 3.97  | 2  | 2   | 277  | 30.4  | 5.88 |
| Q8CDM8   | Protein FAM160B1 OS=Mus musculus GN=Fam160b1 PE=2 SV=2 - [F16B1_MOUSE]                                              | 10.47 | 2 | 6  | 6  | 15  | 0.876 | 0.984 | 0.869 | 0.944 | 42.67  | 10.47 | 10 | 15  | 764  | 86.0  | 5.25 |
| P22907-2 | Isoform 2 of Porphobilinogen deaminase OS=Mus musculus GN=Hmbs -                                                    | 22.09 | 2 | 5  | 6  | 13  | 0.992 | 1.134 | 0.870 | 0.944 | 22.04  | 22.09 | 11 | 13  | 344  | 37.8  | 7.15 |
| Q91Y77   | Protein Ythdf2 OS=Mus musculus GN=Ythdf2 PE=2 SV=1 - [Q91Y77_MOUSE]                                                 | 12.44 | 1 | 4  | 7  | 23  | 0.880 | 0.820 | 0.985 | 0.944 | 37.66  | 12.44 | 11 | 23  | 579  | 62.2  | 8.79 |
| Q3UI43   | BRIS1 and BRCA1-A complex member 1 OS=Mus musculus GN=Babam1 PE=2 SV=1 - [BABA1_MOUSE]                              | 42.64 | 1 | 9  | 9  | 41  | 1.461 | 1.224 | 1.195 | 0.944 | 127.47 | 42.64 | 14 | 41  | 333  | 36.8  | 4.55 |
| D3YZC7   | Bromodomain-containing protein 8 OS=Mus musculus GN=Brd8 PE=2 SV=1 - [D3YZC7_MOUSE]                                 | 9.19  | 4 | 7  | 7  | 16  | 2.094 | 0.969 | 1.043 | 0.945 | 47.33  | 9.19  | 13 | 16  | 881  | 95.6  | 4.72 |
| Q9R171   | Cerebellin-1 OS=Mus musculus GN=Cbln1 PE=1 SV=1 - [CBLN1_MOUSE]                                                     | 37.82 | 1 | 5  | 7  | 47  | 1.211 | 0.553 | 0.748 | 0.945 | 122.29 | 37.82 | 14 | 47  | 193  | 21.1  | 7.28 |
| Q6PDLO   | Cytoplasmic dynein 1 light intermediate chain 2 OS=Mus musculus GN=Dync1l2 PE=1 SV=2 - [DC1L2_MOUSE]                | 42.48 | 2 | 18 | 19 | 114 | 1.235 | 0.728 | 1.116 | 0.945 | 372.00 | 42.48 | 33 | 114 | 492  | 54.2  | 6.28 |
| Q9CXU4   | MCG11298 OS=Mus musculus GN=Timm23 PE=2 SV=1 - [Q9CXU4_MOUSE]                                                       | 12.92 | 2 | 2  | 2  | 3   | 1.063 | 1.118 | 0.841 | 0.945 | 10.26  | 12.92 | 3  | 3   | 209  | 21.9  | 8.60 |
| Q61990   | Poly(rC)-binding protein 2 OS=Mus musculus GN=Pcbp2 PE=1 SV=1 - [PCBP2_MOUSE]                                       | 59.12 | 4 | 7  | 15 | 172 | 0.857 | 0.909 | 0.871 | 0.945 | 478.48 | 59.12 | 27 | 172 | 362  | 38.2  | 6.79 |
| P08074   | Carbonyl reductase [NADPH] 2 OS=Mus musculus GN=Cbr2 PE=1 SV=1 - [CBR2_MOUSE]                                       | 25.41 | 2 | 5  | 6  | 20  | 1.148 | 2.731 | 0.659 | 0.945 | 58.70  | 25.41 | 12 | 20  | 244  | 25.9  | 9.01 |
| P62334   | 26S protease regulatory subunit 10B OS=Mus musculus GN=Psmc6 PE=1 SV=1 -                                            | 62.98 | 1 | 19 | 19 | 116 | 0.985 | 1.101 | 0.893 | 0.945 | 339.09 | 62.98 | 36 | 116 | 389  | 44.1  | 7.49 |
| Q9ES28-3 | Isoform C of Rho guanine nucleotide exchange factor 7 OS=Mus musculus GN=Arhgef7 - [ARHG7_MOUSE]                    | 43.33 | 9 | 24 | 28 | 91  | 0.872 | 0.998 | 1.051 | 0.945 | 235.79 | 43.33 | 46 | 91  | 787  | 88.9  | 6.28 |
| Q3UHK6   | Teneurin-4 OS=Mus musculus GN=Tenm4 PE=1 SV=2 - [TEN4_MOUSE]                                                        | 17.94 | 6 | 34 | 40 | 107 | 0.854 | 1.177 | 1.018 | 0.945 | 289.63 | 17.94 | 68 | 107 | 2771 | 308.2 | 6.57 |
| Q9R0L6   | Pericentriolar material 1 protein OS=Mus musculus GN=Pcm1 PE=1 SV=2 - [PCM1_MOUSE]                                  | 15.75 | 2 | 27 | 28 | 71  | 1.119 | 0.792 | 1.014 | 0.945 | 202.94 | 15.75 | 46 | 71  | 2025 | 228.7 | 5.01 |
| Q3TVA9   | Coiled-coil domain-containing protein 136 OS=Mus musculus GN=Ccdc136 PE=2 SV=2 - [CC136_MOUSE]                      | 23.86 | 7 | 18 | 21 | 90  | 1.163 | 0.661 | 0.887 | 0.946 | 320.71 | 23.86 | 36 | 90  | 1136 | 131.8 | 4.84 |
| A3KGR9   | Minor histocompatibility antigen H13 (Fragment) OS=Mus musculus GN=H13 PE=2 SV=1 - [A3KGR9_MOUSE]                   | 11.53 | 6 | 3  | 3  | 18  | 0.775 | 0.957 | 0.820 | 0.946 | 52.16  | 11.53 | 5  | 18  | 347  | 38.1  | 8.40 |
| Q06138   | Calcium-binding protein 39 OS=Mus musculus GN=Cab39 PE=1 SV=2 - [CAB39_MOUSE]                                       | 41.06 | 3 | 13 | 16 | 76  | 0.864 | 1.189 | 0.935 | 0.946 | 224.74 | 41.06 | 30 | 76  | 341  | 39.8  | 6.89 |

|          |                                                                                                                |       |   |    |    |     |       |       |        |       |        |       |    |     |      |       |       |
|----------|----------------------------------------------------------------------------------------------------------------|-------|---|----|----|-----|-------|-------|--------|-------|--------|-------|----|-----|------|-------|-------|
| O89114   | DnaJ homolog subfamily B member 5 OS=Mus musculus GN=Dnajb5 PE=2 SV=1 -                                        | 27.01 | 2 | 9  | 9  | 23  | 1.461 | 1.228 | 1.279  | 0.946 | 67.35  | 27.01 | 12 | 23  | 348  | 39.1  | 9.04  |
| Q923W1   | Trimethylguanosine synthase OS=Mus musculus GN=Tgs1 PE=1 SV=2 - [TGS1_MOUSE]                                   | 5.98  | 2 | 4  | 4  | 6   | 0.781 | 0.856 | 0.998  | 0.946 | 15.32  | 5.98  | 5  | 6   | 853  | 96.7  | 4.97  |
| O08663   | Methionine aminopeptidase 2 OS=Mus musculus GN=Metap2 PE=1 SV=1 -                                              | 28.87 | 7 | 13 | 13 | 47  | 0.947 | 0.755 | 0.832  | 0.946 | 136.06 | 28.87 | 25 | 47  | 478  | 52.9  | 5.82  |
| P27048   | Small nuclear ribonucleoprotein-associated protein B OS=Mus musculus GN=Snrbp PE=1 SV=1 -                      | 30.30 | 2 | 7  | 7  | 37  | 0.699 | 0.856 | 0.806  | 0.946 | 119.95 | 30.30 | 12 | 37  | 231  | 23.6  | 10.90 |
| Q8K0W9   | DPH3 homolog OS=Mus musculus GN=Dph3 PE=1 SV=1 - [DPH3_MOUSE]                                                  | 25.61 | 1 | 1  | 1  | 3   | 2.928 | 1.202 | 1.228  | 0.946 | 10.48  | 25.61 | 2  | 3   | 82   | 9.3   | 4.09  |
| Q8BFY9-2 | Isoform 2 of Transportin-1 OS=Mus musculus GN=Tnpo1 - [TNPO1_MOUSE]                                            | 15.96 | 4 | 7  | 12 | 24  | 0.760 | 1.133 | 0.808  | 0.946 | 64.80  | 15.96 | 20 | 24  | 890  | 101.2 | 4.96  |
| Q99KL7   | Ras-related protein Rab-28 OS=Mus musculus GN=Rab28 PE=2 SV=1 - [RAB28_MOUSE]                                  | 17.19 | 1 | 3  | 3  | 7   | 1.251 | 1.232 | 1.083  | 0.946 | 22.24  | 17.19 | 5  | 7   | 221  | 24.7  | 5.67  |
| D3YVM2   | Transmembrane protein 59 OS=Mus musculus GN=Tmem59 PE=2 SV=1 - [D3YVM2_MOUSE]                                  | 3.91  | 2 | 1  | 1  | 2   | 0.996 | 0.841 | 0.783  | 0.946 | 4.07   | 3.91  | 1  | 2   | 256  | 28.6  | 5.39  |
| Q62141-1 | Isoform 1 of Paired amphipathic helix protein Sin3b OS=Mus musculus GN=Sin3b - [SIN3B_MOUSE]                   | 5.56  | 6 | 3  | 4  | 5   | 1.133 | 1.219 | 1.459  | 0.946 | 10.68  | 5.56  | 5  | 5   | 954  | 109.3 | 6.55  |
| Q9D187   | Mitotic spindle-associated MXD complex subunit MIP18 OS=Mus musculus GN=Fam96b PE=2 SV=1 - [MIP18_MOUSE]       | 30.06 | 2 | 3  | 3  | 8   | 1.046 | 1.078 | 0.906  | 0.946 | 21.67  | 30.06 | 6  | 8   | 163  | 17.7  | 4.98  |
| E9QAJ9   | Rho GTPase-activating protein 17 OS=Mus musculus GN=Arhgap17 PE=2 SV=1 -                                       | 14.67 | 5 | 7  | 9  | 33  | 0.782 | 0.806 | 0.728  | 0.946 | 92.03  | 14.67 | 15 | 33  | 818  | 88.9  | 8.12  |
| Q80UY2   | E3 ubiquitin-protein ligase KCMF1 OS=Mus musculus GN=Kcmf1 PE=2 SV=1 - [KCMF1_MOUSE]                           | 34.91 | 2 | 7  | 7  | 40  | 1.586 | 1.038 | 1.289  | 0.946 | 133.68 | 34.91 | 11 | 40  | 381  | 41.8  | 5.76  |
| O54983   | Thiomorpholine-carboxylate dehydrogenase OS=Mus musculus GN=Crym PE=1 SV=1 - [CRYM_MOUSE]                      | 39.94 | 1 | 12 | 12 | 128 | 1.041 | 2.399 | 1.151  | 0.946 | 343.74 | 39.94 | 22 | 128 | 313  | 33.5  | 5.67  |
| E9QA15   | DNA fragmentation factor subunit beta OS=Mus musculus GN=Cad PE=2 SV=1 - [E9QA15_MOUSE]                        | 18.83 | 6 | 29 | 34 | 94  | 0.719 | 0.966 | 0.780  | 0.946 | 246.30 | 18.83 | 56 | 94  | 2162 | 236.1 | 6.49  |
| Q60902   | Epidermal growth factor receptor substrate 15-like 1 OS=Mus musculus GN=Eps15l1 PE=1 SV=3 - [EP15R_MOUSE]      | 59.65 | 3 | 7  | 49 | 278 | 1.864 | 1.067 | 1.218  | 0.946 | 765.11 | 59.65 | 83 | 278 | 907  | 99.2  | 5.02  |
| Q9CQV1   | Mitochondrial import inner membrane translocase subunit TIM16 OS=Mus musculus GN=Fam16 PE=2 SV=1 [TIM16_MOUSE] | 47.20 | 1 | 4  | 4  | 19  | 1.185 | 0.956 | 0.963  | 0.946 | 56.38  | 47.20 | 8  | 19  | 125  | 13.8  | 9.64  |
| E9QLT0   | Hydroxyprolyl isomerase OS=Mus musculus GN=Hyi PE=2 SV=1 - [E9QLT0_MOUSE]                                      | 2.62  | 2 | 1  | 1  | 1   | 1.854 | 1.695 | 12.561 | 0.946 | 0.00   | 2.62  | 1  | 1   | 267  | 29.4  | 5.62  |
| Q9JL15   | Galectin-8 OS=Mus musculus GN=Lgals8 PE=2 SV=1 - [LEG8_MOUSE]                                                  | 11.71 | 3 | 3  | 3  | 6   | 1.105 | 0.822 | 0.624  | 0.946 | 24.76  | 11.71 | 5  | 6   | 316  | 36.1  | 8.95  |
| Q9JIZ5   | Activator protein 4 OS=Mus musculus GN=Tfap4 PE=2 SV=1 - [Q9JIZ5_MOUSE]                                        | 3.25  | 1 | 1  | 1  | 1   | 2.073 | 1.464 | 1.397  | 0.946 | 1.89   | 3.25  | 1  | 1   | 338  | 38.7  | 6.09  |
| Q91249   | UAP56-interacting factor OS=Mus musculus GN=Fytd1 PE=1 SV=1 - [UIF_MOUSE]                                      | 31.23 | 4 | 8  | 8  | 13  | 1.004 | 0.859 | 0.987  | 0.946 | 36.52  | 31.23 | 11 | 13  | 317  | 35.9  | 11.84 |
| Q8C3F2   | Constitutive coactivator of PPAR-gamma-like protein 2 OS=Mus musculus GN=Fam120c PE=2 SV=3 - [F120C_MOUSE]     | 24.11 | 3 | 18 | 20 | 81  | 0.627 | 0.690 | 0.783  | 0.947 | 236.78 | 24.11 | 35 | 81  | 1091 | 119.6 | 8.46  |
| Q8R3Y8-2 | Isoform 2 of Interferon regulatory factor 2-binding protein 1 OS=Mus musculus GN=Irf2bp1 - [I2BP1_MOUSE]       | 23.54 | 2 | 11 | 11 | 33  | 1.005 | 0.972 | 0.803  | 0.947 | 101.21 | 23.54 | 18 | 33  | 565  | 59.5  | 8.02  |
| Q810U4-5 | Isoform 5 of Neuronal cell adhesion molecule OS=Mus musculus GN=Nrcam -                                        | 35.77 | 2 | 1  | 7  | 94  | 1.273 | 1.127 | 1.121  | 0.947 | 274.92 | 35.77 | 14 | 94  | 260  | 28.9  | 8.43  |
| P97447   | Four and a half LIM domains protein 1 OS=Mus musculus GN=Phl1 PE=2 SV=3 - [PHL1_MOUSE]                         | 47.86 | 7 | 4  | 14 | 60  | 1.848 | 1.481 | 1.178  | 0.947 | 151.87 | 47.86 | 24 | 60  | 280  | 31.9  | 8.37  |

|        |                                                                                                                                                          |       |   |    |    |     |       |       |       |       |         |       |    |     |      |       |       |
|--------|----------------------------------------------------------------------------------------------------------------------------------------------------------|-------|---|----|----|-----|-------|-------|-------|-------|---------|-------|----|-----|------|-------|-------|
| D3YXN0 | AP-1 complex subunit sigma-1A (Fragment)<br>OS=Mus musculus<br>GN=Ap1s1 PE=2 SV=1 - [D3YXN0_MOUSE]                                                       | 21.69 | 3 | 1  | 3  | 13  | 1.318 | 0.975 | 1.356 | 0.947 | 36.99   | 21.69 | 5  | 13  | 189  | 22.0  | 5.52  |
| D3YWN7 | Enscosin OS=Mus musculus<br>GN=Map7 PE=4 SV=2 - [D3YWN7_MOUSE]                                                                                           | 17.07 | 4 | 12 | 13 | 50  | 0.942 | 0.960 | 1.400 | 0.947 | 154.60  | 17.07 | 22 | 50  | 738  | 82.8  | 9.38  |
| Q8R4R6 | Nucleoporin NUP53<br>OS=Mus musculus<br>GN=Nup35 PE=1 SV=2 - [NUP53_MOUSE]                                                                               | 23.08 | 2 | 5  | 5  | 20  | 1.230 | 0.970 | 0.958 | 0.947 | 72.70   | 23.08 | 9  | 20  | 325  | 34.8  | 9.25  |
| Q80UW8 | DNA-directed RNA polymerases I, II, and III subunit RPABC1 OS=Mus musculus<br>GN=Polr2e PE=2 SV=1 - [RPAB1_MOUSE]                                        | 28.10 | 1 | 5  | 5  | 18  | 1.634 | 1.185 | 0.800 | 0.947 | 56.31   | 28.10 | 9  | 18  | 210  | 24.6  | 5.95  |
| Q91Y08 | Protein Pcdhb1 OS=Mus musculus<br>GN=Pcdhb1 PE=2 SV=1 - [Q91Y08_MOUSE]                                                                                   | 1.34  | 1 | 1  | 1  | 1   | 1.749 | 1.246 | 1.128 | 0.947 | 2.47    | 1.34  | 1  | 1   | 818  | 90.4  | 5.33  |
| Q9D6K8 | FUN14 domain-containing protein 2 OS=Mus musculus<br>GN=Fundc2 PE=2 SV=1 -                                                                               | 26.49 | 1 | 4  | 4  | 11  | 0.618 | 0.849 | 0.863 | 0.947 | 31.40   | 26.49 | 6  | 11  | 151  | 16.6  | 9.70  |
| O08914 | Fatty acid amide hydrolase 1 OS=Mus musculus<br>GN=Faah PE=2 SV=1 - [FAAH1_MOUSE]                                                                        | 36.79 | 1 | 15 | 15 | 40  | 0.737 | 1.237 | 1.143 | 0.947 | 131.08  | 36.79 | 25 | 40  | 579  | 63.2  | 7.87  |
| E9PY08 | Histone acetyltransferase p300 OS=Mus musculus<br>GN=Ep300 PE=4 SV=1 - [E9PY08_MOUSE]                                                                    | 8.50  | 2 | 7  | 12 | 28  | 0.673 | 0.909 | 0.830 | 0.947 | 48.12   | 8.50  | 16 | 28  | 2412 | 263.1 | 8.54  |
| AZAF33 | Protein Tmsb15b1 OS=Mus musculus<br>GN=Tmsb15b1 PE=4 SV=1 - [AZAF33_MOUSE]                                                                               | 77.78 | 1 | 1  | 3  | 16  | 1.542 | 0.973 | 1.425 | 0.947 | 25.98   | 77.78 | 6  | 16  | 45   | 5.2   | 5.34  |
| P63250 | G protein-activated inward rectifier potassium channel 1 OS=Mus musculus<br>GN=Kcnj3 PE=1 SV=1 - [IRK3_MOUSE]                                            | 14.37 | 2 | 6  | 6  | 12  | 0.976 | 1.160 | 1.420 | 0.947 | 34.23   | 14.37 | 10 | 12  | 501  | 56.5  | 8.37  |
| Q9D1T0 | Leucine-rich repeat and immunoglobulin-like domain-containing nogo receptor-interacting protein 1 OS=Mus musculus<br>GN=Lingo1 PE=1 SV=1 - [LIGO1_MOUSE] | 43.00 | 2 | 19 | 22 | 72  | 0.567 | 1.684 | 1.367 | 0.947 | 217.37  | 43.00 | 38 | 72  | 614  | 69.1  | 8.31  |
| P98084 | Amyloid beta A4 precursor protein-binding family A member 2 OS=Mus musculus<br>GN=Apba2 PE=1 SV=2 - [APBA2_MOUSE]                                        | 22.13 | 5 | 8  | 12 | 47  | 1.485 | 0.958 | 1.017 | 0.947 | 134.76  | 22.13 | 21 | 47  | 750  | 82.7  | 4.88  |
| Q922M3 | BTB/POZ domain-containing adapter for CUL3-mediated RhoA degradation protein 3 OS=Mus musculus<br>GN=Kctd10 PE=1 SV=1 - [BACD3_MOUSE]                    | 13.33 | 3 | 4  | 5  | 8   | 1.236 | 1.144 | 0.943 | 0.947 | 16.91   | 13.33 | 8  | 8   | 315  | 35.7  | 6.34  |
| Q3KNM2 | E3 ubiquitin-protein ligase MARCH5 OS=Mus musculus<br>GN=March5 PE=2 SV=1 -                                                                              | 8.99  | 1 | 2  | 2  | 5   | 1.015 | 0.785 | 0.757 | 0.947 | 13.27   | 8.99  | 3  | 5   | 278  | 31.2  | 8.70  |
| Q9QYB5 | Gamma-adducin OS=Mus musculus<br>GN=Add3 PE=1 SV=2 - [ADDG_MOUSE]                                                                                        | 39.52 | 1 | 2  | 21 | 144 | 1.214 | 1.258 | 1.493 | 0.947 | 347.32  | 39.52 | 35 | 144 | 706  | 78.7  | 5.95  |
| Q99J10 | Cytoplasmic tRNA 2-thiolation protein 1 OS=Mus musculus<br>GN=Ctu1 PE=2 SV=1 - [CTU1_MOUSE]                                                              | 8.57  | 1 | 3  | 3  | 9   | 0.917 | 0.709 | 0.934 | 0.947 | 26.22   | 8.57  | 6  | 9   | 420  | 43.8  | 8.10  |
| Q91YR1 | Twinfilin-1 OS=Mus musculus<br>GN=Twf1 PE=1 SV=2 - [TWF1_MOUSE]                                                                                          | 30.86 | 2 | 8  | 11 | 46  | 0.934 | 0.912 | 0.916 | 0.947 | 134.19  | 30.86 | 20 | 46  | 350  | 40.1  | 6.67  |
| P15626 | Glutathione S-transferase Mu 2 OS=Mus musculus<br>GN=Gstm2 PE=1 SV=2 - [GSTM2_MOUSE]                                                                     | 72.02 | 4 | 9  | 17 | 163 | 0.691 | 4.770 | 0.645 | 0.947 | 565.58  | 72.02 | 28 | 163 | 218  | 25.7  | 7.39  |
| Q61625 | Glutamate receptor ionotropic, delta-2 OS=Mus musculus<br>GN=Grid2 PE=1 SV=1 - [GRID2_MOUSE]                                                             | 12.81 | 2 | 10 | 11 | 26  | 0.979 | 0.792 | 1.284 | 0.947 | 81.11   | 12.81 | 17 | 26  | 1007 | 113.0 | 6.10  |
| B1AXJ6 | Low-density lipoprotein receptor-related protein 8 OS=Mus musculus<br>GN=Lrp8 PE=2 SV=1 - [B1AXJ6_MOUSE]                                                 | 13.83 | 7 | 5  | 5  | 7   | 1.059 | 1.017 | 1.075 | 0.947 | 5.83    | 13.83 | 6  | 7   | 694  | 77.2  | 5.00  |
| Q6NXX8 | Acid-sensing ion channel 1 OS=Mus musculus<br>GN=Asic1 PE=1 SV=1 - [ASIC1_MOUSE]                                                                         | 21.10 | 2 | 9  | 11 | 23  | 0.826 | 1.181 | 0.963 | 0.948 | 57.83   | 21.10 | 16 | 23  | 526  | 59.6  | 5.58  |
| A2AUK8 | Band 4.1-like protein 1 OS=Mus musculus<br>GN=Epb4.1l1 PE=4 SV=1 - [A2AUK8_MOUSE]                                                                        | 53.75 | 5 | 19 | 41 | 346 | 1.243 | 1.326 | 1.381 | 0.948 | 1000.42 | 53.75 | 73 | 346 | 867  | 96.8  | 5.66  |
| Q8BV23 | Phospholipase A2, group III, isoform CRA_b OS=Mus musculus<br>GN=Pla2g3 PE=2 SV=1 - [Q8BV23_MOUSE]                                                       | 3.81  | 2 | 1  | 1  | 4   | 1.868 | 1.069 | 0.890 | 0.948 | 0.00    | 3.81  | 1  | 4   | 446  | 49.8  | 8.29  |
| F8WJG3 | Transformer-2 protein homolog beta OS=Mus musculus<br>GN=Tra2b PE=2 SV=1 - [F8WJG3_MOUSE]                                                                | 29.79 | 2 | 4  | 5  | 28  | 0.648 | 1.133 | 0.863 | 0.948 | 89.56   | 29.79 | 10 | 28  | 188  | 21.9  | 10.15 |

|          |                                                                                                                           |       |    |    |    |     |       |       |       |       |        |       |    |     |      |       |       |
|----------|---------------------------------------------------------------------------------------------------------------------------|-------|----|----|----|-----|-------|-------|-------|-------|--------|-------|----|-----|------|-------|-------|
| E9PX95   | Protein Abca17 OS=Mus musculus GN=Abca17 PE=3 SV=1 - [E9PX95_MOUSE]                                                       | 2.31  | 1  | 2  | 3  | 4   | 2.200 | 1.676 | 1.175 | 0.948 | 6.04   | 2.31  | 3  | 4   | 1733 | 195.9 | 7.83  |
| Q0KK55   | Protein very KIND OS=Mus musculus GN=Kndc1 PE=1 SV=2 - [VKIND_MOUSE]                                                      | 13.95 | 6  | 19 | 20 | 53  | 0.861 | 0.614 | 0.752 | 0.948 | 114.62 | 13.95 | 32 | 53  | 1742 | 191.2 | 6.30  |
| Q9CYN9   | Renin receptor OS=Mus musculus GN=Atp6ap2 PE=2 SV=2 - [REN_R_MOUSE]                                                       | 26.00 | 1  | 8  | 8  | 26  | 0.688 | 1.053 | 0.730 | 0.948 | 64.36  | 26.00 | 13 | 26  | 350  | 39.1  | 5.54  |
| P41242-3 | Isoform 3 of Megakaryocyte-associated tyrosine-protein kinase OS=Mus musculus GN=Matk - [MATK_MOUSE]                      | 21.72 | 6  | 7  | 8  | 20  | 0.732 | 1.057 | 1.037 | 0.948 | 67.52  | 21.72 | 12 | 20  | 465  | 51.5  | 8.40  |
| Q8VE19   | WD repeat-containing protein mio OS=Mus musculus GN=Mios PE=2 SV=2 - [MIO_MOUSE]                                          | 14.17 | 1  | 11 | 11 | 22  | 0.879 | 1.340 | 0.937 | 0.948 | 58.61  | 14.17 | 17 | 22  | 875  | 98.3  | 6.71  |
| P97291   | Cadherin-8 OS=Mus musculus GN=Cdh8 PE=1 SV=2 - [CADH8_MOUSE]                                                              | 21.28 | 6  | 10 | 10 | 22  | 1.227 | 0.833 | 1.098 | 0.948 | 63.91  | 21.28 | 15 | 22  | 799  | 88.2  | 4.74  |
| E9QPX3   | NADH dehydrogenase [ubiquinone] iron-sulfur protein 4, mitochondrial OS=Mus musculus GN=Ndufs4 PE=4 SV=1 - [NDUFS4_MOUSE] | 62.29 | 2  | 11 | 11 | 202 | 1.346 | 0.541 | 1.469 | 0.948 | 502.96 | 62.29 | 19 | 202 | 175  | 19.8  | 9.99  |
| E0CZ60   | Protein E330034G19Rik (Fragment) OS=Mus musculus GN=E330034G19Rik PE=2 SV=1 - [E0CZ60_MOUSE]                              | 2.91  | 5  | 1  | 1  | 1   | 0.881 | 1.383 | 0.903 | 0.948 | 1.66   | 2.91  | 1  | 1   | 206  | 23.8  | 6.95  |
| B4XVP9   | Phf11-1 OS=Mus musculus GN=Phf11c PE=2 SV=1 - [B4XVP9_MOUSE]                                                              | 7.37  | 1  | 1  | 1  | 2   | 6.035 | 1.071 | 1.137 | 0.948 | 0.00   | 7.37  | 1  | 2   | 339  | 38.1  | 7.93  |
| Q9CX34   | Suppressor of G2 allele of SKP1 homolog OS=Mus musculus GN=Sugt1 PE=2 SV=3 - [SUGT1_MOUSE]                                | 60.12 | 1  | 16 | 16 | 75  | 1.096 | 0.989 | 1.050 | 0.948 | 220.32 | 60.12 | 26 | 75  | 336  | 38.1  | 5.45  |
| Q3TIV9   | AP-1 complex subunit sigma-2 OS=Mus musculus GN=Ap1s2 PE=2 SV=1 - [Q3TIV9_MOUSE]                                          | 23.57 | 4  | 3  | 3  | 11  | 1.220 | 0.738 | 0.974 | 0.948 | 28.31  | 23.57 | 4  | 11  | 157  | 18.6  | 5.47  |
| Q9WXT8   | Mitotic spindle assembly checkpoint protein MAD1 OS=Mus musculus GN=Mad1l1 PE=2 SV=1 - [MD1L1_MOUSE]                      | 17.43 | 2  | 11 | 11 | 24  | 1.489 | 0.991 | 0.877 | 0.948 | 61.27  | 17.43 | 18 | 24  | 717  | 83.5  | 5.66  |
| Q9CY62   | E3 ubiquitin-protein ligase RNF181 OS=Mus musculus GN=Rnf181 PE=2 SV=1 - [RN181_MOUSE]                                    | 10.91 | 3  | 2  | 2  | 9   | 1.468 | 0.915 | 0.951 | 0.948 | 21.75  | 10.91 | 4  | 9   | 165  | 19.1  | 6.04  |
| P70408   | Cadherin-10 OS=Mus musculus GN=Cdh10 PE=2 SV=3 - [CAD10_MOUSE]                                                            | 17.26 | 2  | 12 | 14 | 37  | 1.088 | 1.191 | 1.255 | 0.949 | 102.00 | 17.26 | 24 | 37  | 788  | 88.3  | 4.94  |
| Q9DAU5   | Protein delta homolog 1 OS=Mus musculus GN=Dik1 PE=2 SV=1 - [Q9DAU5_MOUSE]                                                | 4.48  | 14 | 2  | 2  | 5   | 1.055 | 0.610 | 0.598 | 0.949 | 8.18   | 4.48  | 3  | 5   | 290  | 31.1  | 5.06  |
| Q9D125   | 28S ribosomal protein S25, mitochondrial OS=Mus musculus GN=Mips25 PE=1 SV=1 - [RT25_MOUSE]                               | 35.67 | 1  | 5  | 6  | 18  | 0.750 | 0.925 | 0.942 | 0.949 | 48.42  | 35.67 | 10 | 18  | 171  | 19.9  | 9.23  |
| Q8BTV2-2 | Isoform 2 of Cleavage and polyadenylation specificity factor subunit 7 OS=Mus musculus GN=Cpsf7 - [CPSF7_MOUSE]           | 22.94 | 3  | 9  | 9  | 30  | 0.926 | 0.774 | 0.938 | 0.949 | 75.32  | 22.94 | 16 | 30  | 462  | 51.0  | 7.78  |
| Q3UH60   | Disco-interacting protein 2 homolog B OS=Mus musculus GN=Dip2b PE=1 SV=1 - [DIP2B_MOUSE]                                  | 35.90 | 3  | 12 | 43 | 162 | 1.233 | 0.568 | 1.104 | 0.949 | 476.93 | 35.90 | 76 | 162 | 1574 | 171.0 | 8.09  |
| Q9CQ25   | Mitotic-spindle organizing protein 2 OS=Mus musculus GN=Mt2 PE=1 SV=1 - [MZT2_MOUSE]                                      | 22.01 | 1  | 2  | 2  | 8   | 1.116 | 1.001 | 1.026 | 0.949 | 32.53  | 22.01 | 4  | 8   | 159  | 16.5  | 10.18 |
| E0CYH0   | MCG16685, isoform CRA_d OS=Mus musculus GN=Wtap PE=4 SV=1 - [E0CYH0_MOUSE]                                                | 15.40 | 5  | 4  | 4  | 12  | 1.455 | 1.320 | 1.022 | 0.949 | 28.20  | 15.40 | 6  | 12  | 396  | 44.2  | 5.25  |
| G5E832   | Adenomatosis polyposis coli 2 OS=Mus musculus GN=Apc2 PE=4 SV=1 - [G5E832_MOUSE]                                          | 11.43 | 6  | 17 | 21 | 47  | 0.718 | 0.776 | 0.947 | 0.949 | 115.12 | 11.43 | 32 | 47  | 2274 | 243.0 | 8.88  |
| A2A4U9   | Solute carrier family 13 member 3 OS=Mus musculus GN=Slc13a3 PE=2 SV=1 - [SLC13A3_MOUSE]                                  | 4.84  | 2  | 2  | 2  | 5   | 1.199 | 1.364 | 0.748 | 0.949 | 15.25  | 4.84  | 4  | 5   | 558  | 61.1  | 8.02  |
| Q8R3H7   | Heparan sulfate 2-O-sulfotransferase 1 OS=Mus musculus GN=Hs2st1 PE=1 SV=2 - [HS2ST_MOUSE]                                | 8.15  | 1  | 2  | 2  | 3   | 1.092 | 0.961 | 0.816 | 0.949 | 7.29   | 8.15  | 3  | 3   | 356  | 41.8  | 8.57  |
| E9Q3Q6   | CD166 antigen OS=Mus musculus GN=Aicam PE=2 SV=1 - [E9Q3Q6_MOUSE]                                                         | 47.54 | 5  | 25 | 25 | 129 | 0.967 | 1.998 | 1.210 | 0.949 | 381.81 | 47.54 | 40 | 129 | 570  | 63.6  | 7.27  |
| Q9R1K9   | Centrin-2 OS=Mus musculus GN=Cetr2 PE=1 SV=1 - [CETN2_MOUSE]                                                              | 41.28 | 2  | 7  | 8  | 34  | 1.165 | 1.092 | 1.088 | 0.949 | 75.71  | 41.28 | 13 | 34  | 172  | 19.8  | 5.00  |

|          |                                                                                                                        |       |   |    |    |     |       |       |       |       |        |       |    |     |      |       |      |
|----------|------------------------------------------------------------------------------------------------------------------------|-------|---|----|----|-----|-------|-------|-------|-------|--------|-------|----|-----|------|-------|------|
| Q9QYF9   | Protein NDRG3 OS=Mus musculus GN=Ndr3 PE=1 SV=1 - [NDRG3_MOUSE]                                                        | 31.20 | 3 | 8  | 9  | 73  | 0.850 | 1.094 | 0.893 | 0.949 | 186.08 | 31.20 | 17 | 73  | 375  | 41.5  | 5.25 |
| Q9DCU6   | 39S ribosomal protein L4, mitochondrial OS=Mus musculus GN=Mrl4 PE=2 SV=1 - [RM04_MOUSE]                               | 22.11 | 1 | 6  | 6  | 13  | 0.533 | 0.662 | 0.853 | 0.949 | 42.60  | 22.11 | 11 | 13  | 294  | 33.1  | 9.82 |
| Q99JX4   | Eukaryotic translation initiation factor 3 subunit M OS=Mus musculus GN=Ef3m PE=2 SV=1 - [EIF3M_MOUSE]                 | 9.89  | 3 | 2  | 3  | 5   | 0.294 | 1.217 | 0.687 | 0.949 | 12.12  | 9.89  | 5  | 5   | 374  | 42.5  | 5.74 |
| Q8BK72   | 28S ribosomal protein S27, mitochondrial OS=Mus musculus GN=Mps27 PE=2 SV=2 - [RT27_MOUSE]                             | 36.63 | 1 | 13 | 14 | 40  | 1.103 | 0.956 | 0.908 | 0.949 | 105.82 | 36.63 | 22 | 40  | 415  | 47.7  | 5.50 |
| O70174   | Neuronal acetylcholine receptor subunit alpha-4 OS=Mus musculus GN=Chna4 PE=2 SV=2 - [ACHA4_MOUSE]                     | 11.92 | 2 | 6  | 6  | 20  | 0.587 | 0.469 | 0.890 | 0.949 | 73.64  | 11.92 | 10 | 20  | 629  | 70.3  | 7.25 |
| Q7TMR0   | Lysosomal Pro-X carboxypeptidase OS=Mus musculus GN=Prpc PE=2 SV=2 - [PCP_MOUSE]                                       | 14.66 | 2 | 7  | 7  | 14  | 1.461 | 1.442 | 1.038 | 0.949 | 41.42  | 14.66 | 11 | 14  | 491  | 55.0  | 6.79 |
| Q8BXQ2   | GPI transamidase component PIG-T OS=Mus musculus GN=Pigt PE=1 SV=2 - [PIGT_MOUSE]                                      | 14.43 | 2 | 6  | 8  | 18  | 0.936 | 0.778 | 0.823 | 0.949 | 61.30  | 14.43 | 12 | 18  | 582  | 65.7  | 8.40 |
| B2RX54   | Plexin-B2 OS=Mus musculus GN=Plxb2 PE=1 SV=1 - [PLXB2_MOUSE]                                                           | 21.44 | 1 | 31 | 33 | 85  | 0.855 | 1.038 | 0.818 | 0.949 | 257.77 | 21.44 | 56 | 85  | 1842 | 206.1 | 5.87 |
| Q8VEJ9   | Vacuolar protein sorting-associated protein 4A OS=Mus musculus GN=Vps4a PE=1 SV=1 - [VPS4A_MOUSE]                      | 38.90 | 2 | 9  | 16 | 64  | 0.950 | 1.048 | 0.951 | 0.949 | 163.32 | 38.90 | 30 | 64  | 437  | 48.9  | 7.80 |
| B9E380   | PDZ domain containing 8 OS=Mus musculus GN=Pdz08 PE=2 SV=1 - [B9E380_MOUSE]                                            | 16.74 | 1 | 16 | 16 | 41  | 1.004 | 0.734 | 0.993 | 0.949 | 106.03 | 16.74 | 24 | 41  | 1147 | 127.7 | 6.04 |
| AZAG50   | MAP7 domain-containing protein 2 OS=Mus musculus GN=Map7d2 PE=1 SV=1 -                                                 | 40.85 | 5 | 29 | 32 | 180 | 0.987 | 0.352 | 1.164 | 0.950 | 538.44 | 40.85 | 59 | 180 | 781  | 86.0  | 8.81 |
| G5E8T9   | Hydroxacyl glutathione hydrolase OS=Mus musculus GN=Hagh PE=3 SV=1 - [G5E8T9_MOUSE]                                    | 62.14 | 8 | 14 | 14 | 102 | 2.043 | 1.030 | 1.024 | 0.950 | 281.63 | 62.14 | 24 | 102 | 309  | 34.1  | 7.94 |
| B2RP08   | MCG130675 OS=Mus musculus GN=2410018M08Rik PE=2 SV=1 - [B2RP08_MOUSE]                                                  | 7.41  | 3 | 5  | 5  | 29  | 1.810 | 0.847 | 1.257 | 0.950 | 99.63  | 7.41  | 9  | 29  | 756  | 84.2  | 8.44 |
| Q9JHC9-2 | Isoform 1 of ETS-related transcription factor Elf-2 OS=Mus musculus GN=Elf2 - [ELF2_MOUSE]                             | 10.15 | 4 | 2  | 2  | 5   | 1.042 | 0.807 | 0.680 | 0.950 | 7.84   | 10.15 | 3  | 5   | 581  | 61.9  | 6.55 |
| O35685   | Nuclear migration protein nudC OS=Mus musculus GN=Nudc PE=1 SV=1 - [NUDC_MOUSE]                                        | 51.51 | 1 | 18 | 19 | 90  | 1.372 | 1.158 | 0.906 | 0.950 | 257.78 | 51.51 | 35 | 90  | 332  | 38.3  | 5.26 |
| Q14C51   | Pentatricopeptide repeat domain-containing protein 3, mitochondrial OS=Mus musculus GN=Ptcd3 PE=2 SV=2 - [PTCD3_MOUSE] | 27.15 | 1 | 14 | 17 | 38  | 0.865 | 0.918 | 1.011 | 0.950 | 110.22 | 27.15 | 26 | 38  | 685  | 77.7  | 5.88 |
| Q61010-3 | Isoform 3 of E3 ubiquitin-protein ligase DTX1 OS=Mus musculus GN=Dtx1 -                                                | 2.04  | 3 | 1  | 1  | 2   | 0.812 | 0.874 | 0.942 | 0.950 | 5.42   | 2.04  | 2  | 2   | 539  | 58.1  | 9.67 |
| Q6W8Q3   | Purkinje cell protein 4-like protein 1 OS=Mus musculus GN=Pcp4l1 PE=2 SV=1 -                                           | 11.76 | 1 | 1  | 1  | 9   | 1.839 | 0.540 | 2.586 | 0.950 | 21.24  | 11.76 | 2  | 9   | 68   | 7.5   | 5.52 |
| Q9QZE7   | Translin-associated protein X OS=Mus musculus GN=Tsnax PE=1 SV=1 - [TSNAX_MOUSE]                                       | 60.69 | 1 | 14 | 14 | 58  | 0.947 | 1.094 | 0.791 | 0.950 | 211.33 | 60.69 | 24 | 58  | 290  | 32.9  | 6.55 |
| Q64674   | Spermidine synthase OS=Mus musculus GN=Srm PE=2 SV=1 - [SPEE_MOUSE]                                                    | 47.35 | 1 | 13 | 13 | 56  | 0.924 | 0.892 | 0.955 | 0.950 | 194.09 | 47.35 | 23 | 56  | 302  | 34.0  | 5.50 |
| P22682   | E3 ubiquitin-protein ligase CBL OS=Mus musculus GN=Cbl PE=1 SV=3 - [CBL_MOUSE]                                         | 31.11 | 1 | 19 | 21 | 66  | 1.544 | 1.425 | 1.182 | 0.950 | 206.50 | 31.11 | 37 | 66  | 913  | 100.5 | 6.67 |
| Q6ZPU9   | KIF1-binding protein OS=Mus musculus GN=Kbp PE=2 SV=2 - [KBP_MOUSE]                                                    | 31.60 | 6 | 14 | 14 | 59  | 0.748 | 0.944 | 0.907 | 0.950 | 188.20 | 31.60 | 25 | 59  | 617  | 71.0  | 5.48 |
| Q8VDG3   | Poly(A)-specific ribonuclease PARN OS=Mus musculus GN=Parn PE=1 SV=1 -                                                 | 5.13  | 1 | 3  | 3  | 6   | 0.808 | 0.681 | 0.860 | 0.950 | 14.41  | 5.13  | 4  | 6   | 624  | 71.5  | 5.97 |
| Q9CY10   | Protein Njmu-R1 OS=Mus musculus PE=2 SV=2 - [NJMU_MOUSE]                                                               | 19.34 | 3 | 7  | 8  | 17  | 0.585 | 1.209 | 0.753 | 0.950 | 47.13  | 19.34 | 12 | 17  | 393  | 44.4  | 5.05 |
| Q8C170   | Unconventional myosin-IXa OS=Mus musculus GN=Myo9a PE=1 SV=2 - [MYO9A_MOUSE]                                           | 9.72  | 3 | 20 | 22 | 41  | 0.827 | 0.802 | 1.065 | 0.950 | 110.05 | 9.72  | 32 | 41  | 2542 | 291.9 | 8.97 |
| Q9D419   | RAB23, member RAS oncogene family, isoform CRA_a OS=Mus musculus GN=Rab23 PE=2 SV=1 - [Q9D419_MOUSE]                   | 60.76 | 3 | 11 | 11 | 37  | 1.026 | 1.039 | 0.993 | 0.951 | 108.84 | 60.76 | 19 | 37  | 237  | 26.8  | 7.30 |

|          |                                                                                                                 |       |   |    |    |     |       |       |       |       |         |       |    |     |      |       |      |
|----------|-----------------------------------------------------------------------------------------------------------------|-------|---|----|----|-----|-------|-------|-------|-------|---------|-------|----|-----|------|-------|------|
| Q5DTT2   | PH and SEC7 domain-containing protein 1<br>OS=Mus musculus<br>GN=Psd PE=1 SV=2 - [PSD1_MOUSE]                   | 17.09 | 3 | 13 | 13 | 38  | 0.942 | 1.049 | 1.159 | 0.951 | 92.32   | 17.09 | 19 | 38  | 1024 | 109.6 | 7.05 |
| Q91VR7   | Microtubule-associated proteins 1A/1B light chain 3A<br>OS=Mus musculus<br>GN=Map1k3a PE=1 SV=1 - [MLP3A_MOUSE] | 23.14 | 2 | 1  | 3  | 34  | 2.061 | 1.278 | 1.094 | 0.951 | 78.04   | 23.14 | 6  | 34  | 121  | 14.3  | 8.68 |
| Q6ZWZ2   | Ubiquitin-conjugating enzyme E2 R2<br>OS=Mus musculus<br>GN=Ube2r2 PE=2 SV=1 -                                  | 21.01 | 1 | 4  | 5  | 27  | 1.827 | 1.214 | 0.838 | 0.951 | 70.80   | 21.01 | 10 | 27  | 238  | 27.1  | 4.42 |
| P62761   | Visinin-like protein 1<br>OS=Mus musculus<br>GN=Vsnl1 PE=1 SV=2 - [VISL1_MOUSE]                                 | 78.01 | 1 | 11 | 16 | 441 | 1.238 | 0.986 | 0.974 | 0.951 | 1086.95 | 78.01 | 29 | 441 | 191  | 22.1  | 5.15 |
| E0CYC4   | Cyclin-dependent kinase 8 (Fragment)<br>OS=Mus musculus<br>GN=Cdk8 PE=2 SV=1 - [E0CYC4_MOUSE]                   | 26.12 | 8 | 6  | 6  | 10  | 0.961 | 1.099 | 1.175 | 0.951 | 30.31   | 26.12 | 8  | 10  | 245  | 28.5  | 8.98 |
| Q6PGC1   | ATP-dependent RNA helicase Dhx29<br>OS=Mus musculus<br>GN=Dhx29 PE=2 SV=1 - [DHX29_MOUSE]                       | 12.75 | 1 | 14 | 14 | 28  | 0.820 | 0.825 | 0.926 | 0.951 | 74.66   | 12.75 | 23 | 28  | 1365 | 153.9 | 7.94 |
| Q91YU6   | Leucine zipper putative tumor suppressor 2<br>OS=Mus musculus<br>GN=Lzts2 PE=2 SV=3 - [LZTS2_MOUSE]             | 11.18 | 1 | 5  | 5  | 14  | 0.911 | 1.330 | 1.054 | 0.951 | 33.98   | 11.18 | 7  | 14  | 671  | 72.5  | 7.11 |
| Q9D4Q1   | RIB43A-like with coiled-coils protein 2<br>OS=Mus musculus<br>GN=Ribc2 PE=2 SV=2 - [RIBC2_MOUSE]                | 2.91  | 2 | 1  | 1  | 1   | 1.038 | 1.151 | 0.648 | 0.951 | 2.07    | 2.91  | 1  | 1   | 309  | 37.3  | 9.38 |
| Q9CQH8   | Ribonuclease P protein subunit p14<br>OS=Mus musculus<br>GN=Rpp14 PE=2 SV=1 -                                   | 12.30 | 1 | 1  | 1  | 1   | 1.593 | 0.902 | 0.880 | 0.951 | 2.47    | 12.30 | 1  | 1   | 122  | 13.6  | 8.28 |
| Q8K3A6   | Protein ARMX6<br>OS=Mus musculus<br>GN=Armcx6 PE=2 SV=1 - [ARMX6_MOUSE]                                         | 2.66  | 1 | 1  | 1  | 13  | 1.035 | 0.592 | 1.287 | 0.951 | 13.54   | 2.66  | 2  | 13  | 301  | 33.3  | 5.17 |
| G3X8R0   | Receptor accessory protein 5, isoform CRA_a<br>OS=Mus musculus<br>GN=Reep5 PE=4 SV=1 - [G3X8R0_MOUSE]           | 25.40 | 2 | 6  | 6  | 44  | 0.836 | 0.881 | 0.918 | 0.951 | 98.80   | 25.40 | 10 | 44  | 189  | 21.4  | 8.12 |
| P61809   | Cyclin-dependent kinase 5 activator 1<br>OS=Mus musculus<br>GN=Cdk5r1 PE=1 SV=1 -                               | 13.03 | 2 | 3  | 3  | 4   | 0.792 | 1.869 | 1.647 | 0.951 | 8.17    | 13.03 | 4  | 4   | 307  | 34.0  | 9.35 |
| Q9E597-2 | Isoform 2 of Reticulon-3<br>OS=Mus musculus<br>GN=Rtn3 - [RTN3_MOUSE]                                           | 55.13 | 4 | 37 | 42 | 290 | 1.183 | 1.126 | 1.491 | 0.952 | 851.76  | 55.13 | 73 | 290 | 945  | 101.9 | 4.93 |
| Q2M2N2   | Speckle-type POZ protein-like<br>OS=Mus musculus<br>GN=Spopl PE=2 SV=3 - [SPOPL_MOUSE]                          | 5.87  | 5 | 2  | 2  | 2   | 1.222 | 1.310 | 1.084 | 0.952 | 6.06    | 5.87  | 2  | 2   | 392  | 44.7  | 7.01 |
| G3X9X1   | MCG13111, isoform CRA_a<br>OS=Mus musculus<br>GN=Kdtd2 PE=4 SV=1 - [G3X9X1_MOUSE]                               | 9.95  | 1 | 6  | 6  | 11  | 0.876 | 0.923 | 0.879 | 0.952 | 27.94   | 9.95  | 9  | 11  | 623  | 71.2  | 5.62 |
| Q9Z2X2   | 26S proteasome non-ATPase regulatory subunit 10<br>OS=Mus musculus<br>GN=Psm10 PE=1 SV=3 - [PSD10_MOUSE]        | 19.05 | 1 | 3  | 3  | 11  | 1.258 | 1.075 | 0.982 | 0.952 | 34.50   | 19.05 | 5  | 11  | 231  | 25.1  | 6.06 |
| Q8VE91-3 | Isoform 3 of Protein FAM134B<br>OS=Mus musculus<br>GN=Fam134b - [F134B_MOUSE]                                   | 13.58 | 4 | 3  | 3  | 8   | 0.923 | 0.627 | 1.161 | 0.952 | 16.81   | 13.58 | 5  | 8   | 346  | 38.1  | 4.67 |
| Q1HFZ0-2 | Isoform 2 of tRNA (cytosine(34)-C(5))-methyltransferase<br>OS=Mus musculus<br>GN=Nsun2 - [NSUN2_MOUSE]          | 29.38 | 4 | 17 | 18 | 42  | 0.945 | 1.041 | 0.856 | 0.952 | 121.24  | 29.38 | 28 | 42  | 691  | 77.7  | 6.71 |
| Q9CQ86   | Migration and invasion enhancer 1<br>OS=Mus musculus<br>GN=Mien1 PE=1 SV=1 - [MIEN1_MOUSE]                      | 14.78 | 1 | 2  | 2  | 21  | 1.986 | 1.108 | 1.218 | 0.952 | 53.90   | 14.78 | 4  | 21  | 115  | 12.3  | 4.51 |
| F8VQD7   | Receptor-type tyrosine-protein phosphatase gamma<br>OS=Mus musculus<br>GN=Ptpg PE=2 SV=1 - [F8VQD7_MOUSE]       | 8.95  | 5 | 10 | 11 | 34  | 0.995 | 1.288 | 0.913 | 0.952 | 87.10   | 8.95  | 18 | 34  | 1442 | 161.2 | 6.37 |
| P11930   | Nucleoside diphosphate-linked moiety X motif 19, mitochondrial<br>OS=Mus musculus<br>GN=Nudt19 PE=1 SV=2 -      | 16.81 | 1 | 3  | 4  | 12  | 1.244 | 0.695 | 0.784 | 0.952 | 40.49   | 16.81 | 6  | 12  | 357  | 40.3  | 6.68 |
| E9Q7M2   | Protein Tsc22d2<br>OS=Mus musculus<br>GN=Tsc22d2 PE=2 SV=1 - [E9Q7M2_MOUSE]                                     | 8.19  | 1 | 3  | 6  | 42  | 2.250 | 0.859 | 1.267 | 0.952 | 119.93  | 8.19  | 11 | 42  | 769  | 78.1  | 4.89 |
| B2RWC4   | Gm88 protein<br>OS=Mus musculus<br>GN=Lrrc73 PE=2 SV=1 - [B2RWC4_MOUSE]                                         | 2.22  | 1 | 1  | 1  | 1   | 0.624 | 1.767 | 1.321 | 0.952 | 1.86    | 2.22  | 1  | 1   | 316  | 33.4  | 4.84 |
| D3YWB9   | Contactin-associated protein-like 4<br>OS=Mus musculus<br>GN=Cntnap4 PE=2 SV=1 -                                | 18.40 | 2 | 20 | 20 | 49  | 0.806 | 0.765 | 0.854 | 0.952 | 147.35  | 18.40 | 34 | 49  | 1310 | 144.7 | 7.02 |
| Q5PR73   | GTP-binding protein Diras2<br>OS=Mus musculus<br>GN=Diras2 PE=2 SV=1 - [DIRA2_MOUSE]                            | 58.79 | 1 | 7  | 10 | 28  | 0.672 | 0.746 | 1.198 | 0.952 | 90.04   | 58.79 | 17 | 28  | 199  | 22.5  | 8.76 |

|          |                                                                                                                      |       |   |    |    |     |       |       |       |       |        |       |     |     |      |       |      |
|----------|----------------------------------------------------------------------------------------------------------------------|-------|---|----|----|-----|-------|-------|-------|-------|--------|-------|-----|-----|------|-------|------|
| Q6P4T2   | U5 small nuclear ribonucleoprotein 200 kDa helicase OS=Mus musculus GN=Snmp200 PE=2 SV=1 - [U520_MOUSE]              | 33.94 | 1 | 58 | 59 | 179 | 0.782 | 0.832 | 0.871 | 0.952 | 588.27 | 33.94 | 100 | 179 | 2136 | 244.4 | 6.06 |
| Q9DAW9   | Calponin-3 OS=Mus musculus GN=Cn3 PE=2 SV=1 - [CNN3_MOUSE]                                                           | 41.52 | 1 | 8  | 13 | 78  | 1.651 | 1.097 | 0.993 | 0.952 | 218.04 | 41.52 | 23  | 78  | 330  | 36.4  | 5.72 |
| Q6ZPS2   | Carnosine synthase 1 OS=Mus musculus GN=Carns1 PE=1 SV=2 - [CRNS1_MOUSE]                                             | 5.20  | 4 | 3  | 3  | 11  | 1.269 | 0.398 | 0.935 | 0.952 | 35.97  | 5.20  | 6   | 11  | 827  | 89.2  | 6.04 |
| Q3U155   | Coiled-coil domain-containing protein 174 OS=Mus musculus GN=Ccdc174 PE=2 SV=1 - [CC174_MOUSE]                       | 3.85  | 1 | 1  | 1  | 4   | 1.154 | 1.269 | 1.256 | 0.952 | 11.84  | 3.85  | 2   | 4   | 467  | 53.9  | 6.21 |
| Q9EPU4   | Cleavage and polyadenylation specificity factor subunit 1 OS=Mus musculus GN=Cpsf1 PE=1 SV=1 - [CPSF1_MOUSE]         | 11.31 | 1 | 13 | 14 | 35  | 0.666 | 0.899 | 0.814 | 0.952 | 86.54  | 11.31 | 21  | 35  | 1441 | 160.7 | 6.39 |
| D3Z6X3   | Peroxisomal biogenesis factor 3 OS=Mus musculus GN=Pex3 PE=2 SV=1 - [D3Z6X3_MOUSE]                                   | 3.75  | 4 | 1  | 1  | 1   | 2.130 | 1.125 | 0.971 | 0.952 | 3.98   | 3.75  | 1   | 1   | 293  | 32.7  | 6.64 |
| O08547   | Vesicle-trafficking protein SEC22b OS=Mus musculus GN=Sec22b PE=1 SV=3 - [SC22B_MOUSE]                               | 47.44 | 2 | 8  | 8  | 76  | 0.658 | 1.030 | 0.924 | 0.952 | 241.29 | 47.44 | 15  | 76  | 215  | 24.7  | 8.51 |
| G5E866   | Splicing factor 3B subunit 1 OS=Mus musculus GN=SF3b1 PE=4 SV=1 - [G5E866_MOUSE]                                     | 38.27 | 2 | 39 | 39 | 123 | 0.963 | 0.889 | 1.045 | 0.952 | 393.00 | 38.27 | 66  | 123 | 1304 | 145.7 | 7.09 |
| Q9Z204-3 | Isoform 3 of Heterogeneous nuclear ribonucleoproteins C1/C2 OS=Mus musculus GN=Hnmpc - [Hnmpc - [Hnmpc_MOUSE]        | 38.57 | 2 | 1  | 13 | 64  | 1.340 | 0.793 | 0.905 | 0.952 | 175.54 | 38.57 | 21  | 64  | 293  | 32.3  | 5.08 |
| Q9CQM5   | Thioredoxin domain-containing protein 17 OS=Mus musculus GN=Txdcl17 PE=1 SV=1 - [TXD17_MOUSE]                        | 47.15 | 1 | 5  | 5  | 17  | 1.762 | 1.325 | 1.180 | 0.952 | 41.87  | 47.15 | 9   | 17  | 123  | 14.0  | 4.77 |
| Q9QYS2   | Metabotropic glutamate receptor 3 OS=Mus musculus GN=Grm3 PE=2 SV=1 - [GRM3_MOUSE]                                   | 33.67 | 1 | 25 | 29 | 106 | 0.451 | 0.997 | 1.350 | 0.953 | 281.51 | 33.67 | 48  | 106 | 879  | 99.0  | 7.75 |
| Q62186   | Translocon-associated protein subunit delta OS=Mus musculus GN=Snr4 PE=2 SV=1 - [SSRD_MOUSE]                         | 17.44 | 2 | 2  | 2  | 15  | 1.153 | 1.050 | 0.784 | 0.953 | 56.56  | 17.44 | 4   | 15  | 172  | 18.9  | 5.78 |
| Q8BMS9   | Ras association domain-containing protein 2 OS=Mus musculus GN=Rassf2 PE=2 SV=1 - [RASf2_MOUSE]                      | 28.22 | 3 | 5  | 7  | 16  | 0.865 | 0.863 | 0.970 | 0.953 | 44.02  | 28.22 | 12  | 16  | 326  | 37.9  | 7.94 |
| E0CXQ6   | Tandem C2 domains nuclear protein OS=Mus musculus GN=Tc2n PE=2 SV=1 - [E0CXQ6_MOUSE]                                 | 2.35  | 2 | 1  | 1  | 1   | 1.335 | 1.583 | 1.230 | 0.953 | 0.00   | 2.35  | 1   | 1   | 425  | 47.7  | 8.84 |
| Q8VDU5   | SNF-related serine/threonine-protein kinase OS=Mus musculus GN=Snrk PE=1 SV=1 - [SNRK_MOUSE]                         | 29.28 | 5 | 18 | 18 | 51  | 1.066 | 0.946 | 1.156 | 0.953 | 169.00 | 29.28 | 27  | 51  | 748  | 81.9  | 7.49 |
| J3QNH3   | Uncharacterized protein OS=Mus musculus GN=Gm21788 PE=4 SV=1 - [J3QNH3_MOUSE]                                        | 7.22  | 1 | 1  | 1  | 2   | 1.767 | 1.234 | 1.132 | 0.953 | 3.11   | 7.22  | 1   | 2   | 180  | 20.4  | 9.04 |
| Q3TXS7   | 26S proteasome non-ATPase regulatory subunit 1 OS=Mus musculus GN=Psm1 PE=1 SV=1 - [PSMD1_MOUSE]                     | 42.60 | 3 | 33 | 33 | 138 | 0.711 | 0.987 | 0.847 | 0.953 | 396.95 | 42.60 | 59  | 138 | 953  | 105.7 | 5.39 |
| Q91YJ3   | Thymocyte nuclear protein 1 OS=Mus musculus GN=Thyn1 PE=1 SV=1 - [THYN1_MOUSE]                                       | 41.15 | 1 | 10 | 10 | 21  | 0.846 | 0.759 | 0.886 | 0.953 | 47.13  | 41.15 | 17  | 21  | 226  | 26.2  | 9.11 |
| P60521   | Gamma-aminobutyric acid receptor-associated protein-like 2 OS=Mus musculus GN=Gabarapl2 PE=1 SV=1 - [GABARPL2_MOUSE] | 65.81 | 1 | 7  | 10 | 50  | 1.890 | 0.969 | 0.822 | 0.953 | 148.73 | 65.81 | 19  | 50  | 117  | 13.7  | 8.10 |
| Q9DCH4   | Eukaryotic translation initiation factor 3 subunit F OS=Mus musculus GN=EIF3F PE=1 SV=2 - [EIF3F_MOUSE]              | 33.24 | 1 | 10 | 10 | 45  | 0.741 | 0.933 | 0.773 | 0.953 | 154.89 | 33.24 | 17  | 45  | 361  | 38.0  | 5.58 |
| Q8VHQ3   | Protein phosphatase 1 regulatory inhibitor subunit 16B OS=Mus musculus GN=Ppp1r16b PE=2 SV=1 - [PP16B_MOUSE]         | 9.33  | 2 | 5  | 5  | 10  | 0.965 | 0.526 | 1.405 | 0.953 | 28.84  | 9.33  | 8   | 10  | 568  | 63.5  | 6.58 |
| O35607   | Bone morphogenetic protein receptor type-2 OS=Mus musculus GN=Bmpr2 PE=2 SV=1 - [BMPR2_MOUSE]                        | 22.06 | 1 | 17 | 17 | 44  | 1.001 | 1.240 | 1.171 | 0.953 | 119.80 | 22.06 | 30  | 44  | 1038 | 114.9 | 6.23 |
| P33622   | Apolipoprotein C-III OS=Mus musculus GN=Apoc3 PE=2 SV=2 - [APOC3_MOUSE]                                              | 27.27 | 2 | 2  | 2  | 16  | 3.865 | 4.664 | 0.482 | 0.953 | 61.32  | 27.27 | 4   | 16  | 99   | 11.0  | 4.75 |



|          |                                                                                                                            |       |   |    |    |     |       |       |       |       |        |       |    |     |      |       |      |
|----------|----------------------------------------------------------------------------------------------------------------------------|-------|---|----|----|-----|-------|-------|-------|-------|--------|-------|----|-----|------|-------|------|
| G3UWG2   | T-cell lymphoma invasion and metastasis 1 OS=Mus musculus GN=Tiam1 PE=4 SV=1 - [G3UWG2_MOUSE]                              | 19.99 | 6 | 22 | 23 | 62  | 0.933 | 2.370 | 1.875 | 0.953 | 183.34 | 19.99 | 41 | 62  | 1591 | 177.3 | 6.64 |
| P47941   | Crk-like protein OS=Mus musculus GN=Crkl PE=1 SV=2 - [CRKL_MOUSE]                                                          | 56.44 | 1 | 13 | 13 | 95  | 1.844 | 0.898 | 0.919 | 0.953 | 277.25 | 56.44 | 24 | 95  | 303  | 33.8  | 6.74 |
| Q6PFF0   | Protein Scaf4 OS=Mus musculus GN=Scaf4 PE=2 SV=1 - [Q6PFF0_MOUSE]                                                          | 3.56  | 2 | 2  | 3  | 7   | 1.195 | 1.195 | 1.155 | 0.953 | 26.07  | 3.56  | 4  | 7   | 1209 | 131.6 | 9.60 |
| Q5RJH3   | Cadherin-12 OS=Mus musculus GN=Cdh12 PE=2 SV=1 - [CAD12_MOUSE]                                                             | 8.19  | 1 | 4  | 5  | 9   | 1.178 | 1.100 | 1.189 | 0.953 | 27.73  | 8.19  | 9  | 9   | 794  | 88.4  | 4.83 |
| F6WKY8   | Phospholipase D1 (Fragment) OS=Mus musculus GN=Plid1 PE=4 SV=1 - [F6WKY8_MOUSE]                                            | 8.61  | 1 | 1  | 5  | 7   | 0.766 | 1.029 | 0.940 | 0.953 | 16.16  | 8.61  | 7  | 7   | 871  | 100.1 | 8.78 |
| G3X972   | Protein Sec24c OS=Mus musculus GN=Sec24c PE=4 SV=1 - [G3X972_MOUSE]                                                        | 30.57 | 1 | 28 | 30 | 112 | 0.791 | 0.985 | 0.922 | 0.954 | 305.24 | 30.57 | 50 | 112 | 1096 | 118.5 | 6.84 |
| Q912V0   | Melanoma inhibitory activity protein 2 OS=Mus musculus GN=Mia2 PE=2 SV=2 - [MIA2_MOUSE]                                    | 1.55  | 1 | 1  | 1  | 1   | 0.639 | 1.037 | 0.756 | 0.954 | 1.64   | 1.55  | 1  | 1   | 517  | 57.7  | 4.12 |
| Q8BL99-5 | Isoform 5 of Protein dopey 1 OS=Mus musculus GN=Dopey1 - [DOP1_MOUSE]                                                      | 3.85  | 7 | 7  | 8  | 12  | 0.752 | 1.324 | 0.816 | 0.954 | 33.84  | 3.85  | 12 | 12  | 2391 | 268.1 | 6.21 |
| P52430   | Serum paraoxonase/arylesterase 1 OS=Mus musculus GN=Pon1 PE=1 SV=2 - [P52430_MOUSE]                                        | 11.55 | 3 | 4  | 4  | 6   | 2.170 | 1.487 | 0.744 | 0.954 | 8.93   | 11.55 | 5  | 6   | 355  | 39.5  | 5.22 |
| P47757   | F-actin-capping protein subunit beta OS=Mus musculus GN=Capzb PE=1 SV=3 - [CAPZB_MOUSE]                                    | 58.12 | 4 | 2  | 19 | 269 | 0.892 | 0.657 | 0.740 | 0.954 | 682.18 | 58.12 | 32 | 269 | 277  | 31.3  | 5.74 |
| Q76LL6-3 | Isoform 3 of FH1/FH2 domain-containing protein 3 OS=Mus musculus GN=Fhod3 - [FHOD3_MOUSE]                                  | 4.32  | 4 | 5  | 5  | 13  | 0.609 | 0.500 | 1.003 | 0.954 | 37.68  | 4.32  | 9  | 13  | 1413 | 158.2 | 5.83 |
| D3Z497   | Uncharacterized protein OS=Mus musculus GN=Gm7075 PE=4 SV=1 - [D3Z497_MOUSE]                                               | 8.04  | 2 | 1  | 1  | 8   | 1.867 | 1.060 | 1.434 | 0.954 | 18.69  | 8.04  | 2  | 8   | 112  | 12.6  | 6.70 |
| Q6P8N8   | ATP-dependent Clp protease ATP-binding subunit clpX-like, mitochondrial OS=Mus musculus GN=Clpx PE=2 SV=1 - [Q6P8N8_MOUSE] | 32.42 | 3 | 17 | 17 | 31  | 0.944 | 0.859 | 0.880 | 0.954 | 90.04  | 32.42 | 27 | 31  | 620  | 67.3  | 7.55 |
| Q8BKE6   | Cytochrome P450 20A1 OS=Mus musculus GN=Cyp20a1 PE=2 SV=1 - [CP20A_MOUSE]                                                  | 11.04 | 2 | 3  | 4  | 6   | 1.742 | 1.184 | 0.929 | 0.954 | 18.10  | 11.04 | 5  | 6   | 462  | 52.1  | 6.95 |
| Q9D0T2   | Dual specificity protein phosphatase 12 OS=Mus musculus GN=Dusp12 PE=2 SV=1 - [Q9D0T2_MOUSE]                               | 4.72  | 4 | 2  | 2  | 6   | 0.717 | 1.337 | 0.904 | 0.954 | 13.26  | 4.72  | 4  | 6   | 339  | 37.1  | 7.99 |
| E9P2F0   | Nucleoside diphosphate kinase OS=Mus musculus GN=Gm20390 PE=2 SV=1 - [E9P2F0_MOUSE]                                        | 80.15 | 3 | 6  | 16 | 168 | 0.950 | 1.189 | 0.811 | 0.954 | 504.45 | 80.15 | 29 | 168 | 267  | 30.2  | 8.72 |
| Q6P1B3   | PILR alpha-associated neural protein OS=Mus musculus GN=Plalp PE=1 SV=1 - [PIANP_MOUSE]                                    | 20.14 | 1 | 3  | 3  | 45  | 0.547 | 2.497 | 1.234 | 0.954 | 102.16 | 20.14 | 6  | 45  | 278  | 29.7  | 8.72 |
| E9QKQ5   | Phosphatidate phosphatase LPIN1 OS=Mus musculus GN=Lpin1 PE=2 SV=1 - [E9QKQ5_MOUSE]                                        | 6.96  | 3 | 3  | 4  | 7   | 1.055 | 0.755 | 0.799 | 0.954 | 19.15  | 6.96  | 6  | 7   | 891  | 98.5  | 6.79 |
| Q60960   | Importin subunit alpha-5 OS=Mus musculus GN=Kpna1 PE=1 SV=2 - [IMAS_MOUSE]                                                 | 28.44 | 6 | 6  | 15 | 72  | 0.883 | 0.901 | 0.921 | 0.954 | 189.76 | 28.44 | 25 | 72  | 538  | 60.1  | 5.01 |
| Q8C878   | NEDD8-activating enzyme E1 catalytic subunit OS=Mus musculus GN=Uba3 PE=1 SV=2 - [UBA3_MOUSE]                              | 45.02 | 3 | 17 | 17 | 52  | 0.768 | 0.953 | 0.953 | 0.954 | 141.93 | 45.02 | 29 | 52  | 462  | 51.7  | 5.45 |
| A2AMC3   | GDP-fucose protein O-fucosyltransferase 1 OS=Mus musculus GN=Pofut1 PE=2 SV=1 - [A2AMC3_MOUSE]                             | 22.44 | 3 | 3  | 6  | 14  | 0.928 | 0.984 | 0.791 | 0.954 | 46.38  | 22.44 | 12 | 14  | 352  | 40.0  | 8.70 |
| Q6KCD5-2 | Isoform 2 of Nipped-B-like protein OS=Mus musculus GN=Nipbl - [NIPBL_MOUSE]                                                | 3.31  | 3 | 8  | 8  | 16  | 1.222 | 1.007 | 0.985 | 0.954 | 27.94  | 3.31  | 15 | 16  | 2691 | 303.6 | 7.81 |
| Q8BWU5   | Probable tRNA threonylcarbamoyladenosi ne biosynthesis protein Oseep OS=Mus musculus GN=Oseep PE=2 SV=2 - [OSGEP_MOUSE]    | 33.43 | 3 | 6  | 9  | 27  | 1.074 | 1.243 | 0.644 | 0.954 | 74.80  | 33.43 | 18 | 27  | 335  | 36.3  | 6.24 |
| E9QNG1   | Intersectin-2 OS=Mus musculus GN=Itsn2 PE=2 SV=1 - [E9QNG1_MOUSE]                                                          | 18.40 | 4 | 18 | 27 | 78  | 1.480 | 0.931 | 1.352 | 0.954 | 236.79 | 18.40 | 45 | 78  | 1658 | 188.7 | 8.25 |
| G3X8R8   | MCG123888 OS=Mus musculus GN=Mki2 PE=4 SV=1 - [G3X8R8_MOUSE]                                                               | 32.45 | 1 | 1  | 25 | 102 | 0.850 | 0.988 | 1.614 | 0.954 | 267.90 | 32.45 | 41 | 102 | 1091 | 118.5 | 6.09 |

|          |                                                                                                                                   |       |   |    |    |     |       |       |       |       |        |       |    |     |      |       |      |
|----------|-----------------------------------------------------------------------------------------------------------------------------------|-------|---|----|----|-----|-------|-------|-------|-------|--------|-------|----|-----|------|-------|------|
| Q6P1B1   | Xaa-Pro aminopeptidase 1<br>OS=Mus musculus<br>GN=Xpnpep1 PE=2 SV=1 -<br>[XPP1_MOUSE]                                             | 34.83 | 1 | 18 | 18 | 66  | 0.921 | 1.261 | 1.035 | 0.954 | 199.49 | 34.83 | 31 | 66  | 623  | 69.5  | 5.54 |
| Q8C635   | Glycerol kinase-like 1<br>OS=Mus musculus<br>GN=Gykl1 PE=2 SV=1 -<br>[Q8C635_MOUSE]                                               | 15.85 | 1 | 2  | 5  | 28  | 1.104 | 0.904 | 1.058 | 0.955 | 87.46  | 15.85 | 8  | 28  | 549  | 59.9  | 5.27 |
| K3W455   | Semaphorin-6A OS=Mus<br>musculus GN=Sema6a<br>PE=4 SV=1 -<br>[K3W455_MOUSE]                                                       | 9.55  | 7 | 6  | 7  | 13  | 2.126 | 0.828 | 1.277 | 0.955 | 30.78  | 9.55  | 11 | 13  | 1005 | 111.7 | 8.46 |
| Q99MR0   | Actin-like protein 6B<br>OS=Mus musculus<br>GN=Actl6b PE=1 SV=1 -<br>[ACL6B_MOUSE]                                                | 27.70 | 4 | 9  | 10 | 24  | 0.718 | 1.189 | 0.991 | 0.955 | 62.12  | 27.70 | 17 | 24  | 426  | 46.9  | 5.71 |
| Q62170   | P-selectin glycoprotein<br>ligand 1 OS=Mus<br>musculus GN=Selplg PE=1<br>SV=2 - [SELPL_MOUSE]                                     | 12.59 | 2 | 2  | 2  | 6   | 1.408 | 1.160 | 0.931 | 0.955 | 8.76   | 12.59 | 2  | 6   | 397  | 41.8  | 4.44 |
| Q9CXI3   | DBH-like monoxygenase<br>protein 1 OS=Mus<br>musculus GN=Moxd1<br>PE=1 SV=1 -                                                     | 10.11 | 1 | 5  | 6  | 9   | 1.046 | 1.136 | 0.957 | 0.955 | 23.84  | 10.11 | 8  | 9   | 613  | 69.6  | 6.67 |
| P70196   | TNF receptor-associated<br>factor 6 OS=Mus musculus<br>GN=Traf6 PE=1 SV=2 -<br>[TRAF6_MOUSE]                                      | 2.64  | 1 | 1  | 1  | 3   | 1.106 | 0.961 | 1.018 | 0.955 | 5.63   | 2.64  | 2  | 3   | 530  | 60.0  | 6.55 |
| Q9CQL5   | 39S ribosomal protein L18,<br>mitochondrial OS=Mus<br>musculus GN=Mp118<br>PE=2 SV=1 -<br>[RM18_MOUSE]                            | 22.78 | 1 | 4  | 4  | 15  | 0.956 | 0.883 | 0.854 | 0.955 | 38.68  | 22.78 | 8  | 15  | 180  | 20.7  | 9.28 |
| Q8K273   | Membrane magnesium<br>transporter 1 OS=Mus<br>musculus GN=Mmg1<br>PE=2 SV=1 -                                                     | 26.72 | 1 | 2  | 2  | 6   | 0.941 | 1.040 | 0.845 | 0.955 | 19.36  | 26.72 | 3  | 6   | 131  | 14.7  | 9.16 |
| P22366   | Myeloid differentiation<br>primary response protein<br>MyD88 OS=Mus musculus<br>GN=Myd88 PE=1 SV=3 -<br>[MYD88_MOUSE]             | 10.81 | 3 | 3  | 3  | 4   | 0.966 | 1.084 | 0.961 | 0.955 | 6.85   | 10.81 | 4  | 4   | 296  | 33.7  | 5.52 |
| Q2M3X8-4 | Isoform 4 of Phosphatase<br>and actin regulator 1<br>OS=Mus musculus<br>GN=Phactr1 -                                              | 32.97 | 3 | 1  | 23 | 83  | 0.958 | 0.493 | 0.879 | 0.955 | 225.62 | 32.97 | 37 | 83  | 649  | 73.5  | 7.05 |
| G3XA20   | MCG130431, isoform<br>CRA_a OS=Mus musculus<br>GN=Grip2 PE=4 SV=1 -<br>[G3XA20_MOUSE]                                             | 18.91 | 4 | 12 | 14 | 34  | 0.686 | 0.878 | 1.054 | 0.955 | 86.29  | 18.91 | 24 | 34  | 1042 | 112.2 | 6.86 |
| Q8R1Q8   | Cytoplasmic dynein 1 light<br>intermediate chain 1<br>OS=Mus musculus<br>GN=Dync1l1 PE=1 SV=1 -<br>[DC1L1_MOUSE]                  | 63.86 | 1 | 28 | 29 | 189 | 1.045 | 1.145 | 1.057 | 0.955 | 669.67 | 63.86 | 49 | 189 | 523  | 56.6  | 6.42 |
| Q8BN57   | Uncharacterized protein<br>C3orf33 homolog OS=Mus<br>musculus PE=2 SV=1 -<br>[CC033_MOUSE]                                        | 9.52  | 1 | 2  | 2  | 4   | 0.734 | 1.079 | 0.987 | 0.955 | 11.70  | 9.52  | 4  | 4   | 294  | 33.6  | 9.89 |
| Q8K0Z7   | Translational activator of<br>cytochrome c oxidase 1<br>OS=Mus musculus<br>GN=Taco1 PE=2 SV=1 -<br>[TACO1_MOUSE]                  | 48.30 | 1 | 10 | 11 | 34  | 1.322 | 0.820 | 0.895 | 0.955 | 117.44 | 48.30 | 19 | 34  | 294  | 32.3  | 8.12 |
| D3YTT7   | 40S ribosomal protein SA<br>OS=Mus musculus<br>GN=Rpsa-ps10 PE=3<br>SV=1 - [D3YTT7_MOUSE]                                         | 48.81 | 2 | 11 | 11 | 55  | 0.931 | 0.986 | 0.758 | 0.955 | 178.22 | 48.81 | 22 | 55  | 295  | 32.8  | 4.93 |
| P40124   | Adenylyl cyclase-<br>associated protein 1<br>OS=Mus musculus<br>GN=Cap1 PE=1 SV=4 -                                               | 63.29 | 2 | 23 | 25 | 221 | 1.008 | 1.247 | 1.186 | 0.956 | 705.46 | 63.29 | 46 | 221 | 474  | 51.5  | 7.52 |
| Q6QNU9   | Toll-like receptor 12<br>OS=Mus musculus<br>GN=Tlr12 PE=2 SV=1 -<br>[TLR12_MOUSE]                                                 | 1.55  | 1 | 1  | 1  | 1   | 0.742 | 0.332 | 0.933 | 0.956 | 0.00   | 1.55  | 1  | 1   | 906  | 99.9  | 8.40 |
| Q61200   | Neurexophilin-1 OS=Mus<br>musculus GN=Nxph1<br>PE=2 SV=2 -<br>[NXPH1_MOUSE]                                                       | 8.49  | 2 | 2  | 2  | 4   | 1.422 | 1.641 | 1.128 | 0.956 | 11.77  | 8.49  | 3  | 4   | 271  | 31.0  | 8.63 |
| Q8CIP4   | MAP/microtubule affinity-<br>regulating kinase 4<br>OS=Mus musculus<br>GN=Mark4 PE=1 SV=1 -<br>[MARK4_MOUSE]                      | 16.36 | 1 | 9  | 11 | 58  | 0.880 | 0.838 | 1.040 | 0.956 | 149.08 | 16.36 | 21 | 58  | 752  | 82.6  | 9.67 |
| Q91V09   | WD repeat-containing<br>protein 13 OS=Mus<br>musculus GN=Wdr13<br>PE=1 SV=1 -                                                     | 37.94 | 2 | 14 | 14 | 70  | 1.079 | 1.032 | 0.982 | 0.956 | 218.92 | 37.94 | 24 | 70  | 485  | 53.6  | 9.14 |
| Q9EQ09   | Oxidized low-density<br>lipoprotein receptor 1<br>OS=Mus musculus<br>GN=Olr1 PE=2 SV=2 -<br>[OLR1_MOUSE]                          | 3.58  | 1 | 1  | 2  | 2   | 0.507 | 0.840 | 1.075 | 0.956 | 4.16   | 3.58  | 2  | 2   | 363  | 41.6  | 7.64 |
| E9Q3M9   | Protein 2010300C02Rik<br>OS=Mus musculus<br>GN=2010300C02Rik PE=2<br>SV=1 - [E9Q3M9_MOUSE]                                        | 53.87 | 4 | 15 | 46 | 214 | 1.060 | 1.812 | 2.555 | 0.956 | 541.74 | 53.87 | 74 | 214 | 1175 | 125.8 | 7.37 |
| Q3UHD3-2 | Isoform 2 of Microtubule-<br>associated tumor<br>suppressor candidate 2<br>homolog OS=Mus<br>musculus GN=Mtus2 -<br>[MTUS2_MOUSE] | 24.62 | 6 | 14 | 25 | 70  | 0.957 | 0.873 | 1.442 | 0.956 | 175.09 | 24.62 | 39 | 70  | 1316 | 143.1 | 8.75 |
| P97300-3 | Isoform 3 of Neuroplastin<br>OS=Mus musculus<br>GN=Nptn -<br>[NPTN_MOUSE]                                                         | 33.57 | 5 | 1  | 11 | 174 | 0.734 | 1.334 | 1.457 | 0.956 | 431.32 | 33.57 | 19 | 174 | 277  | 30.8  | 7.49 |

|          |                                                                                                                                                                 |       |   |    |    |     |       |       |       |       |        |       |     |     |      |       |      |
|----------|-----------------------------------------------------------------------------------------------------------------------------------------------------------------|-------|---|----|----|-----|-------|-------|-------|-------|--------|-------|-----|-----|------|-------|------|
| A2AJH3   | Glycylpeptide N-tetradecanoyltransferase 2<br>OS=Mus musculus<br>GN=Nimt2 PE=2 SV=1 - [A2AJH3_MOUSE]                                                            | 27.11 | 3 | 11 | 13 | 27  | 0.592 | 0.718 | 1.223 | 0.956 | 62.11  | 27.11 | 21  | 27  | 498  | 56.9  | 8.16 |
| Q7TNC8   | Glycine receptor subunit alpha-2 OS=Mus musculus<br>GN=Glra2 PE=2 SV=1 - [GLRA2_MOUSE]                                                                          | 8.19  | 1 | 3  | 4  | 17  | 0.553 | 0.786 | 0.816 | 0.956 | 41.56  | 8.19  | 8   | 17  | 452  | 52.0  | 8.90 |
| Q9Z0W3   | Nuclear pore complex protein Nup160 OS=Mus musculus<br>GN=Nup160 PE=1 SV=2 - [NU160_MOUSE]                                                                      | 8.49  | 2 | 10 | 10 | 25  | 0.656 | 0.991 | 0.988 | 0.956 | 65.63  | 8.49  | 15  | 25  | 1402 | 158.1 | 5.52 |
| P26883   | Peptidyl-prolyl cis-trans isomerase FKBP1A OS=Mus musculus<br>GN=Fkbp1a PE=1 SV=2 - [FKB1A_MOUSE]                                                               | 44.44 | 2 | 4  | 5  | 145 | 2.012 | 1.484 | 1.436 | 0.956 | 506.41 | 44.44 | 8   | 145 | 108  | 11.9  | 8.16 |
| P05132   | cAMP-dependent protein kinase catalytic subunit alpha OS=Mus musculus<br>GN=Prkaca PE=1 SV=3 - [KAPCA_MOUSE]                                                    | 51.85 | 2 | 9  | 20 | 86  | 0.476 | 0.875 | 0.942 | 0.956 | 252.01 | 51.85 | 31  | 86  | 351  | 40.5  | 8.79 |
| Q8K124   | Pleckstrin homology domain-containing family O member 2 OS=Mus musculus<br>GN=Plekh2 PE=1 SV=1 - [PLEKH2_MOUSE]                                                 | 26.46 | 1 | 10 | 10 | 31  | 1.250 | 0.804 | 1.106 | 0.956 | 81.14  | 26.46 | 18  | 31  | 495  | 53.8  | 5.50 |
| D6RIQ7   | Transcription initiation factor IIA subunit 2 OS=Mus musculus<br>GN=Gr2a2 PE=2 SV=1 - [D6RIQ7_MOUSE]                                                            | 14.52 | 6 | 1  | 1  | 4   | 0.930 | 0.949 | 0.875 | 0.956 | 10.04  | 14.52 | 2   | 4   | 62   | 7.2   | 9.04 |
| Q9CX60   | Protein LBH OS=Mus musculus<br>GN=Lbh PE=1 SV=1 - [LBH_MOUSE]                                                                                                   | 36.19 | 1 | 4  | 4  | 39  | 2.720 | 0.531 | 0.953 | 0.956 | 150.18 | 36.19 | 8   | 39  | 105  | 12.1  | 4.31 |
| Q8C9X6-2 | Isoform 2 of Enhancer of polycomb homolog 1 OS=Mus musculus<br>GN=Epc1 -                                                                                        | 3.93  | 2 | 2  | 2  | 4   | 1.316 | 0.975 | 1.120 | 0.956 | 6.28   | 3.93  | 3   | 4   | 763  | 84.7  | 8.57 |
| Q9JMK2   | Casein kinase I isoform epsilon OS=Mus musculus<br>GN=Csn1e PE=1 SV=2 - [KC1E_MOUSE]                                                                            | 26.92 | 3 | 4  | 10 | 59  | 0.922 | 0.690 | 1.092 | 0.956 | 168.93 | 26.92 | 18  | 59  | 416  | 47.3  | 9.66 |
| Q3UHD9   | Arf-GAP with GTPase, ANK repeat and PH domain-containing protein 2 OS=Mus musculus<br>GN=Agap2 PE=1 SV=1 - [AGAP2_MOUSE]                                        | 44.94 | 2 | 38 | 39 | 168 | 0.578 | 1.261 | 1.445 | 0.956 | 532.97 | 44.94 | 69  | 168 | 1186 | 124.4 | 9.89 |
| Q80V11   | E3 ubiquitin-protein ligase TRIM56 OS=Mus musculus<br>GN=Trim56 PE=1 SV=1 - [TRIM56_MOUSE]                                                                      | 2.86  | 2 | 3  | 3  | 5   | 0.986 | 1.015 | 0.803 | 0.957 | 9.95   | 2.86  | 5   | 5   | 734  | 79.5  | 7.96 |
| Q8VE11   | Myotubularin-related protein 6 OS=Mus musculus<br>GN=Mtmr6 PE=1 SV=1 -                                                                                          | 23.34 | 1 | 12 | 13 | 28  | 1.020 | 1.035 | 0.872 | 0.957 | 88.63  | 23.34 | 20  | 28  | 617  | 70.9  | 7.83 |
| O35188   | Fractalkine OS=Mus musculus<br>GN=Cx3cl1 PE=2 SV=3 - [X3CL1_MOUSE]                                                                                              | 12.15 | 1 | 4  | 4  | 16  | 1.605 | 3.236 | 1.751 | 0.957 | 50.46  | 12.15 | 6   | 16  | 395  | 42.1  | 5.54 |
| Q99LC9   | Peroxisome assembly factor 2 OS=Mus musculus<br>GN=Pex6 PE=2 SV=1 - [PEX6_MOUSE]                                                                                | 8.87  | 1 | 6  | 6  | 11  | 0.648 | 0.706 | 0.806 | 0.957 | 39.82  | 8.87  | 11  | 11  | 981  | 104.5 | 7.34 |
| Q91V64   | Isochorismatase domain-containing protein 1 OS=Mus musculus<br>GN=Isoc1 PE=2 SV=1 - [ISOC1_MOUSE]                                                               | 49.83 | 2 | 12 | 13 | 40  | 0.571 | 0.675 | 0.564 | 0.957 | 126.94 | 49.83 | 24  | 40  | 297  | 32.0  | 7.39 |
| Q5SWU9   | Acetyl-CoA carboxylase 1 OS=Mus musculus<br>GN=Acaca PE=1 SV=1 - [ACACA_MOUSE]                                                                                  | 33.52 | 3 | 56 | 64 | 183 | 0.826 | 0.698 | 0.819 | 0.957 | 532.92 | 33.52 | 104 | 183 | 2345 | 265.1 | 6.39 |
| Q3U1J4   | DNA damage-binding protein 1 OS=Mus musculus<br>GN=Ddb1 PE=1 SV=2 - [DDB1_MOUSE]                                                                                | 42.28 | 1 | 45 | 45 | 195 | 0.958 | 1.028 | 0.921 | 0.957 | 580.30 | 42.28 | 84  | 195 | 1140 | 126.8 | 5.26 |
| Q0P678   | Zinc finger CCCH domain-containing protein 18 OS=Mus musculus<br>GN=Zc3h18 PE=1 SV=1 - [ZCH18_MOUSE]                                                            | 14.66 | 5 | 11 | 12 | 22  | 0.660 | 0.765 | 0.841 | 0.957 | 67.85  | 14.66 | 19  | 22  | 948  | 105.6 | 7.80 |
| Q6PDJ6   | F-box only protein 42 OS=Mus musculus<br>GN=Fbxo42 PE=1 SV=1 - [FBX42_MOUSE]                                                                                    | 5.44  | 1 | 4  | 4  | 8   | 0.720 | 1.047 | 0.835 | 0.957 | 23.29  | 5.44  | 6   | 8   | 717  | 77.7  | 7.58 |
| P11404   | Fatty acid-binding protein, heart OS=Mus musculus<br>GN=Fabp3 PE=1 SV=5 - [FABPH_MOUSE]                                                                         | 75.94 | 2 | 12 | 13 | 129 | 2.105 | 1.180 | 1.208 | 0.957 | 319.42 | 75.94 | 23  | 129 | 133  | 14.8  | 6.57 |
| Q5SV54   | Ortholog of human amyotrophic lateral sclerosis 2 (Juvenile) chromosome region, candidate 19 (ALS2CR19) OS=Mus musculus<br>GN=Pard3b PE=4 SV=1 - [Q5SV54_MOUSE] | 1.54  | 4 | 2  | 2  | 5   | 1.413 | 1.253 | 1.095 | 0.957 | 9.67   | 1.54  | 2   | 5   | 1104 | 121.7 | 8.69 |
| Q9QZC2   | Plexin-C1 OS=Mus musculus<br>GN=Plxnc1 PE=1 SV=1 - [PLXC1_MOUSE]                                                                                                | 22.24 | 1 | 30 | 32 | 91  | 0.947 | 1.971 | 0.766 | 0.957 | 258.17 | 22.24 | 55  | 91  | 1574 | 176.4 | 7.75 |
| O88273   | Gremlin-2 OS=Mus musculus<br>GN=Grem2 PE=1 SV=1 - [GREM2_MOUSE]                                                                                                 | 8.93  | 1 | 1  | 1  | 1   | 1.134 | 0.976 | 0.947 | 0.957 | 2.43   | 8.93  | 1   | 1   | 168  | 19.3  | 9.17 |

|          |                                                                                                                                |       |    |    |    |     |       |       |       |       |        |       |     |     |      |       |       |
|----------|--------------------------------------------------------------------------------------------------------------------------------|-------|----|----|----|-----|-------|-------|-------|-------|--------|-------|-----|-----|------|-------|-------|
| E9QMD3   | Zinc finger homeobox protein 3 OS=Mus musculus GN=Zfx3 PE=3 SV=1 - [E9QMD3_MOUSE]                                              | 3.20  | 2  | 8  | 9  | 13  | 2.350 | 0.621 | 1.340 | 0.957 | 23.39  | 3.20  | 9   | 13  | 3723 | 405.9 | 6.24  |
| P14824   | Annexin A6 OS=Mus musculus GN=Anxa6 PE=1 SV=3 - [ANXA6_MOUSE]                                                                  | 62.11 | 2  | 41 | 42 | 289 | 0.970 | 1.108 | 0.909 | 0.957 | 857.19 | 62.11 | 76  | 289 | 673  | 75.8  | 5.50  |
| E9Q6A7   | Protein Bptf OS=Mus musculus GN=Bptf PE=2 SV=1 - [E9Q6A7_MOUSE]                                                                | 6.03  | 3  | 13 | 13 | 17  | 1.490 | 1.101 | 0.873 | 0.958 | 44.04  | 6.03  | 16  | 17  | 2921 | 321.4 | 7.59  |
| D3Z5K8   | SH3 and multiple ankyrin repeat domains protein 2 OS=Mus musculus GN=Shank2 PE=2 SV=1 - [D3Z5K8_MOUSE]                         | 33.19 | 1  | 1  | 45 | 192 | 0.444 | 1.062 | 1.732 | 0.958 | 595.40 | 33.19 | 79  | 192 | 1841 | 200.0 | 6.68  |
| Q62093   | Serine/arginine-rich splicing factor 2 OS=Mus musculus GN=Srsf2 PE=1 SV=4 - [SRSF2_MOUSE]                                      | 9.50  | 1  | 3  | 3  | 27  | 0.830 | 0.964 | 0.946 | 0.958 | 58.49  | 9.50  | 5   | 27  | 221  | 25.5  | 11.85 |
| Q811D0-2 | Isform 2 of Disks large homolog 1 OS=Mus musculus GN=Dlg1 - [DLG1_MOUSE]                                                       | 44.68 | 5  | 3  | 32 | 207 | 0.707 | 0.727 | 0.837 | 0.958 | 585.74 | 44.68 | 58  | 207 | 893  | 99.6  | 6.07  |
| Q8CFJ9   | WD repeat-containing protein 24 OS=Mus musculus GN=Wdr24 PE=2 SV=1 - [WDR24_MOUSE]                                             | 4.43  | 1  | 3  | 3  | 6   | 1.059 | 1.307 | 1.160 | 0.958 | 20.34  | 4.43  | 4   | 6   | 790  | 88.1  | 6.46  |
| Q5NBX1-2 | Isform 2 of Protein cordon-bleu OS=Mus musculus GN=Cobl - [COBL_MOUSE]                                                         | 11.00 | 11 | 11 | 11 | 26  | 0.991 | 1.092 | 1.620 | 0.958 | 74.35  | 11.00 | 19  | 26  | 1255 | 135.4 | 8.21  |
| Q6PB66   | Leucine-rich PPR motif-containing protein, mitochondrial OS=Mus musculus GN=Lpprc PE=1 SV=2 - [LPPRC_MOUSE]                    | 53.23 | 3  | 67 | 68 | 242 | 0.650 | 1.008 | 0.858 | 0.958 | 729.33 | 53.23 | 121 | 242 | 1392 | 156.5 | 6.83  |
| Q8BVA9   | ELAV (Embryonic lethal, abnormal vision, Drosophila)-like 4 (Hu antigen D) OS=Mus musculus GN=Elav4 PE=2 SV=1 - [Q8BVA9_MOUSE] | 52.63 | 11 | 6  | 17 | 85  | 0.822 | 0.657 | 0.745 | 0.958 | 254.47 | 52.63 | 31  | 85  | 380  | 41.7  | 9.39  |
| Q93092   | Transaldolase OS=Mus musculus GN=Taldo1 PE=1 SV=2 - [TALDO_MOUSE]                                                              | 54.30 | 1  | 24 | 24 | 127 | 1.137 | 0.790 | 0.902 | 0.958 | 315.71 | 54.30 | 42  | 127 | 337  | 37.4  | 7.03  |
| G5E895   | MCG142264, isoform CRA_b OS=Mus musculus GN=Akr1b10 PE=4 SV=1 - [G5E895_MOUSE]                                                 | 54.43 | 4  | 7  | 14 | 59  | 1.510 | 0.998 | 0.904 | 0.958 | 212.25 | 54.43 | 21  | 59  | 316  | 35.8  | 7.28  |
| B0QZL3   | Proton-associated sugar transporter A OS=Mus musculus GN=Slc45a1 PE=2 SV=1 - [SLC45A1_MOUSE]                                   | 12.30 | 2  | 6  | 6  | 8   | 1.410 | 0.761 | 0.793 | 0.958 | 26.00  | 12.30 | 8   | 8   | 675  | 73.3  | 7.40  |
| Q6P6L5   | Protein Mybp1 OS=Mus musculus GN=Mybp1 PE=2 SV=1 - [Q6P6L5_MOUSE]                                                              | 6.23  | 4  | 3  | 4  | 4   | 2.115 | 1.133 | 0.720 | 0.958 | 8.41   | 6.23  | 4   | 4   | 1124 | 126.1 | 5.95  |
| Q61627   | Glutamate receptor ionotropic, delta-1 OS=Mus musculus GN=Grid1 PE=1 SV=2 - [GRID1_MOUSE]                                      | 20.32 | 1  | 16 | 17 | 32  | 1.030 | 1.233 | 0.944 | 0.958 | 94.80  | 20.32 | 28  | 32  | 1009 | 112.1 | 6.70  |
| Q923X1   | EGF, latrophilin seven transmembrane domain-containing protein 1 OS=Mus musculus GN=Eltd1 PE=2 SV=3 - [ELTD1_MOUSE]            | 2.44  | 1  | 1  | 1  | 1   | 1.641 | 1.250 | 1.068 | 0.958 | 1.69   | 2.44  | 1   | 1   | 739  | 82.2  | 6.86  |
| Q8BFX1   | E3 ubiquitin-protein ligase RNF187 OS=Mus musculus GN=Rnf187 PE=1 SV=2 - [RNF187_MOUSE]                                        | 10.17 | 1  | 2  | 2  | 3   | 1.301 | 0.716 | 1.068 | 0.958 | 8.87   | 10.17 | 2   | 3   | 236  | 26.3  | 5.59  |
| O09044   | Synaptosomal-associated protein 23 OS=Mus musculus GN=Snap23 PE=1 SV=1 - [SNAP23_MOUSE]                                        | 60.00 | 5  | 8  | 9  | 114 | 1.544 | 0.834 | 0.907 | 0.958 | 308.35 | 60.00 | 15  | 114 | 210  | 23.2  | 4.98  |
| Q66X22   | NACHT, LRR and PYD domains-containing protein 9B OS=Mus musculus GN=Nlrp9b PE=2 SV=1 - [NLRP9B_MOUSE]                          | 1.50  | 7  | 1  | 2  | 2   | 3.369 | 0.868 | 0.702 | 0.958 | 4.28   | 1.50  | 2   | 2   | 1003 | 114.7 | 7.59  |
| Q8C419   | Probable G-protein coupled receptor 158 OS=Mus musculus GN=Gpr158 PE=1 SV=2 - [GPR158_MOUSE]                                   | 35.00 | 1  | 33 | 33 | 238 | 0.779 | 0.868 | 1.461 | 0.958 | 669.28 | 35.00 | 60  | 238 | 1200 | 134.3 | 8.09  |
| J3KMNO   | Protein Kmt2d OS=Mus musculus GN=Kmt2d PE=4 SV=1 - [J3KMNO_MOUSE]                                                              | 2.36  | 2  | 9  | 10 | 20  | 1.185 | 1.037 | 1.120 | 0.958 | 52.31  | 2.36  | 14  | 20  | 5588 | 599.9 | 5.78  |
| O35639   | Annexin A3 OS=Mus musculus GN=Anxa3 PE=1 SV=4 - [ANXA3_MOUSE]                                                                  | 55.11 | 1  | 16 | 18 | 59  | 1.277 | 2.529 | 0.834 | 0.958 | 155.53 | 55.11 | 33  | 59  | 323  | 36.4  | 5.76  |
| Q8CI71   | Coiled-coil domain-containing protein 132 OS=Mus musculus GN=Ccdc132 PE=1 SV=2 - [CC132_MOUSE]                                 | 28.94 | 5  | 25 | 25 | 69  | 0.569 | 1.263 | 1.021 | 0.958 | 209.72 | 28.94 | 42  | 69  | 964  | 111.1 | 6.07  |
| F6ZZL0   | Alpha-protein kinase 2 (Fragment) OS=Mus musculus GN=Alpk2 PE=2 SV=1 - [F6ZZL0_MOUSE]                                          | 3.05  | 3  | 4  | 4  | 4   | 2.285 | 1.273 | 1.398 | 0.958 | 11.49  | 3.05  | 4   | 4   | 1608 | 174.1 | 4.93  |
| O35526   | Syntaxin-1A OS=Mus musculus GN=Snx1a PE=1 SV=3 - [STX1A_MOUSE]                                                                 | 72.92 | 2  | 15 | 21 | 235 | 0.557 | 2.208 | 1.538 | 0.959 | 696.85 | 72.92 | 32  | 235 | 288  | 33.0  | 5.24  |

|          |                                                                                                                     |       |   |    |    |     |       |       |       |       |         |       |    |     |      |       |      |
|----------|---------------------------------------------------------------------------------------------------------------------|-------|---|----|----|-----|-------|-------|-------|-------|---------|-------|----|-----|------|-------|------|
| P68510   | 14-3-3 protein eta<br>OS=Mus musculus<br>GN=Ywhah PE=1 SV=2 -<br>[1433F_MOUSE]                                      | 59.35 | 2 | 11 | 17 | 677 | 0.963 | 1.194 | 1.027 | 0.959 | 1826.75 | 59.35 | 30 | 677 | 246  | 28.2  | 4.89 |
| Q9WUM3   | Coronin-1B OS=Mus musculus GN=Coro1b PE=1 SV=1 -<br>[COR1B_MOUSE]                                                   | 38.84 | 2 | 16 | 16 | 68  | 1.034 | 0.987 | 1.101 | 0.959 | 192.20  | 38.84 | 27 | 68  | 484  | 53.9  | 5.78 |
| Q5YST2   | Palmitoyltransferase ZDHHc18 OS=Mus musculus GN=Zdhhc18 PE=1 SV=4 -                                                 | 3.95  | 1 | 1  | 1  | 3   | 1.018 | 0.942 | 1.031 | 0.959 | 5.28    | 3.95  | 1  | 3   | 380  | 41.1  | 8.95 |
| A6X8Z5   | Rho GTPase-activating protein 31 OS=Mus musculus GN=Arhgap31 PE=1 SV=1 -                                            | 2.11  | 1 | 2  | 2  | 5   | 0.553 | 0.970 | 1.064 | 0.959 | 12.96   | 2.11  | 3  | 5   | 1425 | 155.2 | 5.77 |
| Q61037-4 | Isoform C of Tuberin OS=Mus musculus GN=Tsc2 - [TSC2_MOUSE]                                                         | 20.45 | 5 | 2  | 24 | 80  | 0.413 | 0.637 | 1.032 | 0.959 | 206.36  | 20.45 | 40 | 80  | 1770 | 197.0 | 6.80 |
| Q9R0B6   | Laminin subunit gamma-3 OS=Mus musculus GN=Lamc3 PE=2 SV=2 -<br>[LAMC3_MOUSE]                                       | 2.59  | 2 | 3  | 3  | 3   | 1.206 | 1.184 | 1.325 | 0.959 | 9.64    | 2.59  | 3  | 3   | 1581 | 172.2 | 6.96 |
| P41230-2 | Isoform 2 of Lysine-specific demethylase 5C OS=Mus musculus GN=Kdm5c -                                              | 4.38  | 3 | 4  | 6  | 12  | 1.147 | 0.880 | 1.041 | 0.959 | 22.73   | 4.38  | 8  | 12  | 1551 | 174.9 | 5.40 |
| A2B114   | Coiled-coil domain-containing protein 171 (Fragment) OS=Mus musculus GN=Ccdc171 PE=2 SV=1 -<br>[Ccdc171_MOUSE]      | 7.03  | 6 | 6  | 8  | 12  | 1.972 | 1.345 | 1.254 | 0.959 | 22.56   | 7.03  | 8  | 12  | 1166 | 135.0 | 6.76 |
| Q8K310   | Matrix-3 OS=Mus musculus GN=Matr3 PE=1 SV=1 - [MATR3_MOUSE]                                                         | 43.97 | 2 | 32 | 32 | 297 | 0.705 | 0.818 | 0.989 | 0.959 | 857.72  | 43.97 | 57 | 297 | 846  | 94.6  | 6.25 |
| Q8BZR4   | Acyl-coenzyme A thioesterase 8 OS=Mus musculus GN=Acot8 PE=2 SV=1 - [Q8BZR4_MOUSE]                                  | 17.54 | 3 | 4  | 4  | 7   | 0.842 | 1.164 | 0.627 | 0.959 | 20.73   | 17.54 | 7  | 7   | 268  | 29.5  | 7.12 |
| H3BJR6   | Sodium channel subunit beta-3 OS=Mus musculus GN=Scn3b PE=2 SV=1 -<br>[H3BJR6_MOUSE]                                | 22.86 | 4 | 4  | 4  | 10  | 0.743 | 1.538 | 0.940 | 0.959 | 28.51   | 22.86 | 7  | 10  | 175  | 20.3  | 4.75 |
| Q6ZPY2   | Protein SMG5 OS=Mus musculus GN=Smg5 PE=2 SV=2 - [SMG5_MOUSE]                                                       | 5.31  | 2 | 5  | 5  | 8   | 1.242 | 0.847 | 0.949 | 0.959 | 12.36   | 5.31  | 7  | 8   | 1017 | 114.0 | 6.00 |
| Q8R016   | Bleomycin hydrolase OS=Mus musculus GN=Blmh PE=2 SV=1 -<br>[BLMH_MOUSE]                                             | 45.93 | 4 | 5  | 18 | 115 | 0.812 | 1.179 | 0.838 | 0.959 | 318.70  | 45.93 | 33 | 115 | 455  | 52.5  | 6.48 |
| E0CYH7   | Filamin A-interacting protein 1-like OS=Mus musculus GN=Filip1 PE=2 SV=1 - [E0CYH7_MOUSE]                           | 4.95  | 5 | 3  | 4  | 4   | 0.779 | 0.913 | 0.928 | 0.959 | 6.92    | 4.95  | 4  | 4   | 1131 | 129.8 | 6.33 |
| Q3UKC1   | Tax1-binding protein 1 homolog OS=Mus musculus GN=Tax1bp1 PE=1 SV=2 -                                               | 29.36 | 3 | 21 | 22 | 67  | 1.480 | 1.035 | 1.245 | 0.959 | 180.65  | 29.36 | 39 | 67  | 814  | 93.6  | 5.33 |
| Q99KQ4   | Nicotinamide phosphoribosyltransferase OS=Mus musculus GN=Nampt PE=1 SV=1 -<br>[NAMPT_MOUSE]                        | 62.12 | 1 | 25 | 25 | 93  | 0.896 | 0.950 | 0.859 | 0.959 | 291.48  | 62.12 | 45 | 93  | 491  | 55.4  | 7.15 |
| E9QZ59   | Coiled-coil domain-containing protein 43 OS=Mus musculus GN=Ccdc43 PE=2 SV=1 -<br>[E9QZ59_MOUSE]                    | 18.92 | 3 | 5  | 5  | 23  | 1.233 | 0.800 | 1.313 | 0.959 | 54.98   | 18.92 | 10 | 23  | 222  | 25.0  | 5.02 |
| B0R0Y8   | SH3 domain-containing kinase-binding protein 1 (Fragment) OS=Mus musculus GN=Sh3kbp1 PE=2 SV=1 -<br>[SH3KBP1_MOUSE] | 66.51 | 1 | 1  | 9  | 52  | 1.763 | 1.018 | 1.354 | 0.959 | 161.80  | 66.51 | 17 | 52  | 209  | 22.4  | 9.48 |
| P47759   | Neurospora-specific protein family member 2 OS=Mus musculus GN=Nsg2 PE=2 SV=1 - [NSG2_MOUSE]                        | 15.20 | 3 | 2  | 2  | 4   | 0.897 | 1.232 | 1.023 | 0.959 | 12.28   | 15.20 | 4  | 4   | 171  | 19.0  | 9.39 |
| Q7TNK1   | Transcription factor RFX4 OS=Mus musculus GN=Rfx4 PE=1 SV=1 -<br>[RFX4_MOUSE]                                       | 11.16 | 4 | 3  | 3  | 4   | 0.346 | 0.568 | 1.035 | 0.959 | 2.90    | 11.16 | 3  | 4   | 735  | 83.3  | 6.80 |
| O35174   | Potassium voltage-gated channel subfamily 5 member 2 OS=Mus musculus GN=Kcns2 PE=2 SV=1 - [KCNK2_MOUSE]             | 3.56  | 2 | 2  | 2  | 3   | 1.103 | 0.930 | 1.036 | 0.959 | 6.24    | 3.56  | 2  | 3   | 477  | 54.3  | 5.72 |
| Q8BGE6   | Cysteine protease ATG4B OS=Mus musculus GN=Atg4b PE=1 SV=2 -<br>[ATG4B_MOUSE]                                       | 28.75 | 2 | 8  | 8  | 24  | 0.692 | 1.009 | 0.849 | 0.959 | 87.36   | 28.75 | 14 | 24  | 393  | 44.3  | 5.07 |
| P63321   | Ras-related protein Ral-A OS=Mus musculus GN=Rala PE=1 SV=1 -<br>[RALA_MOUSE]                                       | 51.94 | 1 | 3  | 8  | 60  | 0.782 | 0.699 | 0.878 | 0.959 | 163.58  | 51.94 | 13 | 60  | 206  | 23.5  | 7.11 |
| O55192   | Sodium-dependent noradrenaline transporter OS=Mus musculus GN=Slc6a2 PE=2 SV=2 -<br>[SC6A2_MOUSE]                   | 5.02  | 1 | 1  | 2  | 8   | 1.420 | 0.671 | 0.848 | 0.959 | 24.21   | 5.02  | 4  | 8   | 617  | 69.2  | 7.44 |
| Q50173-3 | Isoform 3 of Phosphatase and actin regulator 4 OS=Mus musculus GN=Phactr4 -                                         | 29.40 | 4 | 10 | 13 | 44  | 1.611 | 0.679 | 1.083 | 0.959 | 127.47  | 29.40 | 22 | 44  | 704  | 77.6  | 6.58 |

|          |                                                                                                                          |       |    |    |    |     |       |       |       |       |        |       |    |     |      |       |      |
|----------|--------------------------------------------------------------------------------------------------------------------------|-------|----|----|----|-----|-------|-------|-------|-------|--------|-------|----|-----|------|-------|------|
| Q99M71   | Mammalian ependymin-related protein 1 OS=Mus musculus GN=Epr1 PE=2 SV=1 - [EPDR1_MOUSE]                                  | 30.36 | 2  | 6  | 6  | 131 | 1.697 | 0.929 | 1.272 | 0.960 | 416.46 | 30.36 | 12 | 131 | 224  | 25.5  | 7.58 |
| Q9WU6    | Mitogen-activated protein kinase 9 OS=Mus musculus GN=Mapk9 PE=1 SV=2 -                                                  | 44.92 | 11 | 7  | 14 | 52  | 0.929 | 0.865 | 0.828 | 0.960 | 137.30 | 44.92 | 24 | 52  | 423  | 48.2  | 5.97 |
| Q9DAA6-2 | Isoform 2 of Exosome complex component CSL4 OS=Mus musculus GN=Exosc1 - [EXOS1_MOUSE]                                    | 9.09  | 2  | 1  | 1  | 2   | 1.565 | 1.115 | 1.086 | 0.960 | 7.02   | 9.09  | 2  | 2   | 154  | 16.8  | 6.29 |
| Q9CR16   | Peptidyl-prolyl cis-trans isomerase D OS=Mus musculus GN=Ppid PE=1 SV=3 - [PPIID_MOUSE]                                  | 63.24 | 1  | 21 | 22 | 122 | 0.918 | 1.043 | 0.933 | 0.960 | 272.38 | 63.24 | 39 | 122 | 370  | 40.7  | 7.43 |
| Q60850-3 | Isoform 3 of Solute carrier family 23 member 3 OS=Mus musculus GN=Slc23a3 -                                              | 13.93 | 3  | 1  | 1  | 2   | 0.843 | 0.826 | 0.938 | 0.960 | 0.00   | 13.93 | 1  | 2   | 122  | 13.2  | 6.05 |
| Q99M04   | Lipoyl synthase, mitochondrial OS=Mus musculus GN=Lias PE=2 SV=1 - [LIAS_MOUSE]                                          | 23.86 | 2  | 7  | 7  | 14  | 1.113 | 0.629 | 0.884 | 0.960 | 48.69  | 23.86 | 10 | 14  | 373  | 41.9  | 8.88 |
| Q9Z0V2   | Potassium voltage-gated channel subfamily D member 2 OS=Mus musculus GN=Kcnd2 PE=1 SV=1 - [KCND2_MOUSE]                  | 23.97 | 1  | 11 | 12 | 70  | 0.702 | 0.640 | 1.023 | 0.960 | 193.42 | 23.97 | 20 | 70  | 630  | 70.5  | 8.07 |
| Q60575-2 | Isoform 2 of Kinesin-like protein KIF1B OS=Mus musculus GN=Kif1b - [KIF1B_MOUSE]                                         | 20.73 | 8  | 15 | 32 | 97  | 0.857 | 0.785 | 0.941 | 0.960 | 244.20 | 20.73 | 49 | 97  | 1770 | 198.8 | 5.59 |
| O54786-2 | Isoform 1 CAD-S of DNA fragmentation factor subunit alpha OS=Mus musculus GN=Dffa - [DFFA_MOUSE]                         | 36.60 | 2  | 9  | 9  | 20  | 2.659 | 0.788 | 1.371 | 0.960 | 56.33  | 36.60 | 14 | 20  | 265  | 29.2  | 4.59 |
| E9Q6W4   | Protein Zfp296 OS=Mus musculus GN=Zfp296 PE=2 SV=1 - [E9Q6W4_MOUSE]                                                      | 19.10 | 1  | 3  | 3  | 3   | 1.380 | 0.856 | 1.101 | 0.960 | 4.23   | 19.10 | 3  | 3   | 445  | 47.8  | 9.16 |
| Q91YJ5   | Translation initiation factor IF-2, mitochondrial OS=Mus musculus GN=Mtif2 PE=1 SV=2 - [IF2M_MOUSE]                      | 26.55 | 5  | 17 | 17 | 33  | 1.045 | 0.670 | 1.043 | 0.960 | 86.12  | 26.55 | 25 | 33  | 727  | 81.2  | 7.24 |
| Q9QUH0   | Glutaredoxin-1 OS=Mus musculus GN=Grx PE=1 SV=3 - [GLRX1_MOUSE]                                                          | 37.38 | 1  | 4  | 4  | 19  | 1.333 | 0.749 | 0.989 | 0.960 | 61.87  | 37.38 | 7  | 19  | 107  | 11.9  | 8.37 |
| Q8C854   | Myelin expression factor 2 OS=Mus musculus GN=Myef2 PE=1 SV=1 - [MYEF2_MOUSE]                                            | 42.13 | 8  | 21 | 22 | 92  | 0.772 | 0.879 | 0.868 | 0.960 | 229.33 | 42.13 | 38 | 92  | 591  | 63.3  | 8.87 |
| Q8BH0-2  | Isoform 2 of Histone deacetylase complex subunit SAP130 OS=Mus musculus GN=Sap130 - [SP130_MOUSE]                        | 5.35  | 4  | 4  | 4  | 10  | 1.629 | 0.878 | 1.242 | 0.960 | 26.45  | 5.35  | 7  | 10  | 879  | 92.8  | 9.98 |
| Q8C015   | Serine/threonine-protein kinase PAK 7 OS=Mus musculus GN=Pak7 PE=1 SV=1 - [PAK7_MOUSE]                                   | 27.82 | 1  | 14 | 15 | 40  | 0.936 | 0.941 | 1.264 | 0.960 | 119.40 | 27.82 | 27 | 40  | 719  | 80.9  | 8.21 |
| Q9QXW9   | Large neutral amino acids transporter small subunit 2 OS=Mus musculus GN=Slc7a8 PE=1 SV=1 - [LAT2_MOUSE]                 | 6.03  | 1  | 2  | 2  | 5   | 0.468 | 1.180 | 1.280 | 0.960 | 13.54  | 6.03  | 3  | 5   | 531  | 57.8  | 6.67 |
| P62046   | Leucine-rich repeat and calponin homology domain containing protein 1 OS=Mus musculus GN=Lrch1 PE=1 SV=2 - [LRCH1_MOUSE] | 19.89 | 1  | 9  | 10 | 21  | 1.385 | 0.859 | 0.778 | 0.960 | 55.11  | 19.89 | 16 | 21  | 709  | 79.0  | 6.13 |
| D3Z6I8   | Tropomyosin alpha-3 chain OS=Mus musculus GN=Tpm3 PE=2 SV=1 - [D3Z6I8_MOUSE]                                             | 38.06 | 2  | 4  | 15 | 319 | 1.726 | 1.227 | 1.407 | 0.960 | 851.77 | 38.06 | 26 | 319 | 247  | 28.7  | 4.79 |
| Q3V3R4   | Integrin alpha-1 OS=Mus musculus GN=Itga1 PE=2 SV=2 - [ITA1_MOUSE]                                                       | 10.60 | 2  | 13 | 13 | 23  | 1.083 | 1.301 | 1.054 | 0.960 | 60.26  | 10.60 | 17 | 23  | 1179 | 130.7 | 6.20 |
| E9PWJ4   | Protein Aut2 OS=Mus musculus GN=Aut2 PE=2 SV=1 - [E9PWJ4_MOUSE]                                                          | 3.93  | 3  | 2  | 2  | 2   | 1.691 | 1.682 | 1.358 | 0.960 | 4.58   | 3.93  | 2  | 2   | 789  | 87.4  | 9.23 |
| O55242-2 | Isoform 2 of Sigma non-opioid intracellular receptor 1 OS=Mus musculus GN=Sigmar1 - [SGMR1_MOUSE]                        | 14.06 | 2  | 2  | 3  | 8   | 0.835 | 0.957 | 0.720 | 0.960 | 22.93  | 14.06 | 5  | 8   | 192  | 21.6  | 5.94 |
| Q35136   | Neural cell adhesion molecule 2 OS=Mus musculus GN=Ncam2 PE=1 SV=1 -                                                     | 42.05 | 2  | 30 | 32 | 222 | 0.922 | 1.191 | 0.957 | 0.961 | 641.86 | 42.05 | 60 | 222 | 837  | 93.1  | 6.07 |
| Q80Y55   | BSD domain-containing protein 1 OS=Mus musculus GN=Bsdcl1 PE=2 SV=1 - [BSDCL1_MOUSE]                                     | 28.34 | 2  | 8  | 8  | 27  | 1.816 | 1.341 | 1.379 | 0.961 | 92.46  | 28.34 | 16 | 27  | 427  | 46.9  | 4.40 |
| Q91JQ0   | GPI mannosyltransferase 3 OS=Mus musculus GN=Pigb PE=1 SV=2 - [PIGB_MOUSE]                                               | 3.87  | 1  | 2  | 2  | 5   | 0.756 | 0.943 | 0.929 | 0.961 | 19.97  | 3.87  | 3  | 5   | 542  | 63.1  | 9.23 |

|          |                                                                                                                   |       |   |    |    |     |       |       |       |       |         |       |     |     |      |       |       |
|----------|-------------------------------------------------------------------------------------------------------------------|-------|---|----|----|-----|-------|-------|-------|-------|---------|-------|-----|-----|------|-------|-------|
| Q35857   | Mitochondrial import inner membrane translocase subunit TIM44 OS=Mus musculus GN=Timm44 PE=2 SV=2 - [TIM44_MOUSE] | 40.04 | 2 | 20 | 20 | 77  | 0.824 | 0.799 | 0.944 | 0.961 | 239.73  | 40.04 | 38  | 77  | 452  | 51.1  | 8.13  |
| Q8R550   | SH3 domain-containing kinase-binding protein 1 OS=Mus musculus GN=Sh3kbp1 PE=1 SV=1 - [SH3K1_MOUSE]               | 48.80 | 9 | 18 | 26 | 147 | 1.645 | 0.825 | 1.435 | 0.961 | 437.94  | 48.80 | 48  | 147 | 709  | 78.1  | 7.55  |
| Q9CZK7   | Transmembrane protein 55A OS=Mus musculus GN=Tmem55a PE=1 SV=1 - [TM55A_MOUSE]                                    | 32.30 | 1 | 6  | 6  | 21  | 1.090 | 1.073 | 0.953 | 0.961 | 69.11   | 32.30 | 11  | 21  | 257  | 28.0  | 8.68  |
| Q99N57   | RAF proto-oncogene serine/threonine-protein kinase OS=Mus musculus GN=Raf1 PE=1 SV=2 - [RAF1_MOUSE]               | 17.44 | 3 | 4  | 11 | 34  | 0.776 | 1.000 | 0.897 | 0.961 | 107.14  | 17.44 | 21  | 34  | 648  | 72.9  | 9.16  |
| Q6NXI6-2 | Isoform 2 of Regulation of nuclear pre-mRNA domain-containing protein 2 OS=Mus musculus GN=Rprd2 - [RPRD2_MOUSE]  | 18.11 | 2 | 16 | 16 | 45  | 1.447 | 1.169 | 1.234 | 0.961 | 125.51  | 18.11 | 25  | 45  | 1425 | 151.3 | 6.93  |
| Q8BLR9-2 | Isoform 2 of Hypoxia-inducible factor 1-alpha inhibitor OS=Mus musculus GN=Hif1a - [HIF1A_MOUSE]                  | 5.32  | 2 | 2  | 2  | 7   | 1.016 | 0.956 | 0.989 | 0.961 | 14.95   | 5.32  | 4   | 7   | 263  | 30.4  | 6.55  |
| Q3V3Q7   | Phosphofurin acidic cluster sorting protein 2 OS=Mus musculus GN=Pacs2 PE=1 SV=2 - [PACS2_MOUSE]                  | 17.52 | 2 | 9  | 11 | 35  | 0.811 | 0.375 | 0.821 | 0.961 | 111.54  | 17.52 | 17  | 35  | 862  | 94.9  | 6.51  |
| Q8R0W0   | Epiplakin OS=Mus musculus GN=Eppk1 PE=1 SV=2 - [EPIPL_MOUSE]                                                      | 2.46  | 1 | 7  | 10 | 31  | 1.883 | 1.018 | 0.922 | 0.961 | 62.05   | 2.46  | 14  | 31  | 6548 | 724.2 | 6.07  |
| A2RTL5   | Arginine/serine-rich coiled-coil protein 2 OS=Mus musculus GN=Rsrc2 PE=2 SV=1 - [RSRC2_MOUSE]                     | 6.12  | 3 | 2  | 2  | 5   | 1.518 | 0.868 | 0.804 | 0.961 | 13.17   | 6.12  | 4   | 5   | 376  | 43.8  | 11.46 |
| F7DCH5   | CLIP-associating protein 2 OS=Mus musculus GN=Clasp2 PE=4 SV=1 - [F7DCH5_MOUSE]                                   | 52.95 | 2 | 2  | 58 | 285 | 0.664 | 0.296 | 0.782 | 0.961 | 768.05  | 52.95 | 102 | 285 | 1307 | 142.8 | 8.66  |
| E0CXZ8   | Dynammin-3 OS=Mus musculus GN=Dnm3 PE=2 SV=1 - [E0CXZ8_MOUSE]                                                     | 46.08 | 3 | 1  | 15 | 56  | 1.345 | 0.651 | 0.883 | 0.961 | 167.11  | 46.08 | 23  | 56  | 319  | 35.7  | 5.62  |
| Q9WV96   | Mitochondrial import inner membrane translocase subunit Tim10 B OS=Mus musculus GN=Timm10b PE=2 SV=1 [T10B_MOUSE] | 51.00 | 5 | 4  | 4  | 13  | 1.218 | 1.017 | 1.027 | 0.961 | 46.42   | 51.00 | 8   | 13  | 100  | 11.3  | 7.08  |
| Q8K2Q7   | BRO1 domain-containing protein BROX OS=Mus musculus GN=Brox PE=2 SV=1 - [BROX_MOUSE]                              | 33.82 | 3 | 10 | 11 | 26  | 0.574 | 0.611 | 0.722 | 0.961 | 77.04   | 33.82 | 17  | 26  | 411  | 46.2  | 7.69  |
| Q9QZ88-2 | Isoform 2 of Vacuolar protein sorting-associated protein 29 OS=Mus musculus GN=Vps29 - [VPS29_MOUSE]              | 39.78 | 5 | 8  | 8  | 47  | 1.065 | 0.992 | 0.866 | 0.961 | 148.48  | 39.78 | 14  | 47  | 186  | 20.9  | 7.05  |
| Q8BGW5-2 | Isoform 2 of SOSS complex subunit B2 OS=Mus musculus GN=Nabp1 - [NABP1_MOUSE]                                     | 12.71 | 4 | 1  | 2  | 3   | 1.086 | 0.958 | 1.050 | 0.961 | 4.32    | 12.71 | 3   | 3   | 118  | 13.0  | 9.45  |
| O08648-2 | Isoform B of Mitogen-activated protein kinase kinase kinase 4 OS=Mus musculus GN=Map3k4 - [M3K4_MOUSE]            | 13.14 | 2 | 19 | 19 | 36  | 0.848 | 0.869 | 0.870 | 0.961 | 100.55  | 13.14 | 28  | 36  | 1545 | 175.0 | 6.37  |
| Q8VEE0   | Ribulose-phosphate 3-epimerase OS=Mus musculus GN=Rpe PE=2 SV=1 - [RPE_MOUSE]                                     | 15.79 | 4 | 3  | 3  | 9   | 1.549 | 0.950 | 0.966 | 0.961 | 27.00   | 15.79 | 6   | 9   | 228  | 24.9  | 5.41  |
| Q9D513   | Meiosis-specific with OB domain-containing protein OS=Mus musculus GN=Meiob PE=2 SV=3 - [MEIOB_MOUSE]             | 1.91  | 1 | 1  | 1  | 1   | 1.006 | 2.696 | 0.917 | 0.961 | 2.31    | 1.91  | 1   | 1   | 470  | 52.9  | 6.96  |
| O70293-2 | Isoform GRK6B of G protein-coupled receptor kinase 6 OS=Mus musculus GN=Grk6 - [GRK6_MOUSE]                       | 25.47 | 3 | 12 | 13 | 32  | 0.776 | 0.824 | 0.967 | 0.962 | 95.43   | 25.47 | 20  | 32  | 589  | 67.1  | 8.66  |
| F8VQ44   | Peptidyl-glycine alpha-amidating monooxygenase OS=Mus musculus GN=Pam PE=2 SV=1 - [F8VQ44_MOUSE]                  | 37.12 | 6 | 32 | 32 | 95  | 1.143 | 0.928 | 0.735 | 0.962 | 276.50  | 37.12 | 52  | 95  | 978  | 108.8 | 6.60  |
| P12960   | Contactin-1 OS=Mus musculus GN=Cntn1 PE=1 SV=1 - [CNTN1_MOUSE]                                                    | 58.33 | 1 | 53 | 54 | 735 | 0.935 | 1.002 | 0.951 | 0.962 | 2116.83 | 58.33 | 98  | 735 | 1020 | 113.3 | 6.16  |
| Q62384   | Zinc finger protein ZPR1 OS=Mus musculus GN=Znf259 PE=1 SV=1 - [ZPR1_MOUSE]                                       | 44.88 | 3 | 15 | 15 | 49  | 1.642 | 1.160 | 1.057 | 0.962 | 125.63  | 44.88 | 25  | 49  | 459  | 50.7  | 4.78  |
| Q8QZT1   | Acetyl-CoA acetyltransferase, mitochondrial OS=Mus musculus GN=Acat1 PE=1 SV=1 - [THIL_MOUSE]                     | 74.76 | 1 | 24 | 24 | 286 | 1.018 | 0.823 | 0.868 | 0.962 | 938.88  | 74.76 | 40  | 286 | 424  | 44.8  | 8.51  |

|          |                                                                                                                   |       |    |    |     |      |       |       |       |       |         |       |     |      |      |       |       |
|----------|-------------------------------------------------------------------------------------------------------------------|-------|----|----|-----|------|-------|-------|-------|-------|---------|-------|-----|------|------|-------|-------|
| O70572   | Sphingomyelin phosphodiesterase 2 OS=Mus musculus GN=Smpd2 PE=1 SV=1 -                                            | 12.89 | 1  | 5  | 5   | 18   | 0.710 | 0.834 | 0.818 | 0.962 | 53.26   | 12.89 | 10  | 18   | 419  | 47.4  | 6.44  |
| D3Z5H8   | Nucleoside diphosphate-linked moiety X motif 8, mitochondrial OS=Mus musculus GN=Nudt8 PE=4 SV=1 - [D3Z5H8_MOUSE] | 18.56 | 2  | 2  | 2   | 8    | 3.733 | 0.829 | 0.771 | 0.962 | 9.36    | 18.56 | 3   | 8    | 167  | 18.7  | 5.03  |
| P97772   | Metabotropic glutamate receptor 1 OS=Mus musculus GN=Grm1 PE=2 SV=2 - [GRM1_MOUSE]                                | 19.18 | 3  | 17 | 19  | 88   | 0.856 | 1.032 | 0.951 | 0.962 | 191.59  | 19.18 | 32  | 88   | 1199 | 133.1 | 6.86  |
| Q77PD2   | Protein FAM185A OS=Mus musculus GN=Fam185a PE=2 SV=1 - [F185A_MOUSE]                                              | 13.76 | 2  | 4  | 4   | 9    | 0.872 | 0.862 | 0.963 | 0.962 | 29.94   | 13.76 | 6   | 9    | 378  | 40.0  | 6.38  |
| P53811   | Phosphatidylinositol transfer protein beta isoform OS=Mus musculus GN=Pitpnb PE=1 SV=2 - [PIPnb_MOUSE]            | 53.51 | 1  | 12 | 15  | 38   | 0.729 | 1.115 | 0.921 | 0.962 | 98.71   | 53.51 | 24  | 38   | 271  | 31.5  | 6.95  |
| G3UYI5   | Protein mago nashi homolog 2 (Fragment) OS=Mus musculus GN=Magohb PE=2 SV=1 - [G3UYI5_MOUSE]                      | 40.00 | 4  | 4  | 4   | 25   | 0.661 | 0.822 | 0.821 | 0.962 | 51.49   | 40.00 | 6   | 25   | 115  | 13.4  | 5.54  |
| F7B2D1   | Synaptophysin-like protein 2 (Fragment) OS=Mus musculus GN=Syp12 PE=4 SV=1 - [F7B2D1_MOUSE]                       | 2.34  | 1  | 1  | 1   | 1    | 0.762 | 0.995 | 0.911 | 0.962 | 2.27    | 2.34  | 1   | 1    | 256  | 28.6  | 10.21 |
| Q3U284   | Transmembrane protein 231 OS=Mus musculus GN=Tmem231 PE=1 SV=1 - [TM231_MOUSE]                                    | 6.35  | 1  | 3  | 3   | 3    | 0.749 | 0.740 | 0.900 | 0.962 | 5.89    | 6.35  | 3   | 3    | 315  | 36.2  | 8.16  |
| Q9DBN4   | Putative monooxygenase p33MONOX OS=Mus musculus GN=P33monox PE=1 SV=1 - [P33MX_MOUSE]                             | 51.49 | 6  | 12 | 12  | 31   | 1.447 | 0.794 | 1.314 | 0.962 | 95.27   | 51.49 | 19  | 31   | 303  | 32.7  | 9.42  |
| Q8BFQ9   | Kelch-like protein 42 OS=Mus musculus GN=Klh42 PE=2 SV=1 - [KLH42_MOUSE]                                          | 1.83  | 1  | 1  | 1   | 2    | 1.222 | 0.859 | 0.906 | 0.962 | 4.42    | 1.83  | 2   | 2    | 493  | 55.6  | 6.32  |
| G3X9J4   | Protein Z310035C23Rik OS=Mus musculus GN=Z310035C23Rik PE=4 SV=1 - [G3X9J4_MOUSE]                                 | 33.14 | 5  | 33 | 33  | 134  | 0.900 | 1.146 | 1.030 | 0.962 | 366.77  | 33.14 | 58  | 134  | 1216 | 134.5 | 5.34  |
| B8QI34   | Liprin-alpha 2 OS=Mus musculus GN=Ppfa2 PE=2 SV=1 - [B8QI34_MOUSE]                                                | 37.47 | 3  | 20 | 41  | 182  | 1.011 | 1.345 | 1.398 | 0.962 | 540.20  | 37.47 | 70  | 182  | 1257 | 143.2 | 6.11  |
| E9Q8S5   | Microtubule-associated serine/threonine-protein kinase 3 OS=Mus musculus GN=Mast3 PE=2 SV=1 - [E9Q8S5_MOUSE]      | 16.93 | 4  | 12 | 15  | 23   | 1.453 | 1.200 | 1.463 | 0.962 | 62.81   | 16.93 | 20  | 23   | 1305 | 142.5 | 8.65  |
| P20357   | Microtubule-associated protein 2 OS=Mus musculus GN=Map2 PE=1 SV=2 - [MTAP2_MOUSE]                                | 65.32 | 10 | 86 | 111 | 1529 | 1.453 | 1.574 | 1.540 | 0.963 | 4451.42 | 65.32 | 192 | 1529 | 1828 | 199.0 | 4.91  |
| Q9CQC9   | GTP-binding protein SAR1b OS=Mus musculus GN=Sar1b PE=1 SV=1 - [SAR1B_MOUSE]                                      | 55.05 | 1  | 6  | 9   | 32   | 0.525 | 0.600 | 0.622 | 0.963 | 103.24  | 55.05 | 14  | 32   | 198  | 22.4  | 6.11  |
| Q9CY34   | NEDD8-conjugating enzyme UBE2F OS=Mus musculus GN=Ube2f PE=1 SV=1 - [UB2FA_MOUSE]                                 | 52.43 | 2  | 7  | 7   | 14   | 1.154 | 0.880 | 1.215 | 0.963 | 35.78   | 52.43 | 11  | 14   | 185  | 21.1  | 6.54  |
| Q8CEC2   | Aryl hydrocarbon receptor nuclear translocator OS=Mus musculus GN=Arnt PE=2 SV=1 - [Q8CEC2_MOUSE]                 | 1.84  | 5  | 1  | 1   | 1    | 0.981 | 0.777 | 0.926 | 0.963 | 2.43    | 1.84  | 1   | 1    | 760  | 83.5  | 6.73  |
| Q3TNH5-3 | Isoform 3 of Protein FAM172A OS=Mus musculus GN=Fam172a - [F172A_MOUSE]                                           | 12.70 | 4  | 4  | 4   | 11   | 0.813 | 0.617 | 0.809 | 0.963 | 30.08   | 12.70 | 7   | 11   | 307  | 35.8  | 6.61  |
| Q8BVP5   | Casein kinase I isoform gamma-2 OS=Mus musculus GN=Csnk1g2 PE=1 SV=1 -                                            | 25.54 | 2  | 2  | 9   | 18   | 0.492 | 0.740 | 0.756 | 0.963 | 65.91   | 25.54 | 13  | 18   | 415  | 47.6  | 9.06  |
| P06151   | L-lactate dehydrogenase A chain OS=Mus musculus GN=Ldha PE=1 SV=3 - [LDHA_MOUSE]                                  | 63.86 | 7  | 22 | 25  | 263  | 0.876 | 1.453 | 1.031 | 0.963 | 707.65  | 63.86 | 43  | 263  | 332  | 36.5  | 7.74  |
| Q69Z98   | Serine/threonine-protein kinase BRSK2 OS=Mus musculus GN=Brsk2 PE=1 SV=2 - [BRSK2_MOUSE]                          | 42.99 | 7  | 4  | 26  | 124  | 1.168 | 1.000 | 0.908 | 0.963 | 385.30  | 42.99 | 47  | 124  | 735  | 81.7  | 8.79  |
| Q8K4X7   | 1-acyl-sn-glycerol-3-phosphate acyltransferase delta OS=Mus musculus GN=Agpat4 PE=2 SV=1 - [PLCD_MOUSE]           | 21.69 | 2  | 9  | 10  | 42   | 0.863 | 0.778 | 0.855 | 0.963 | 105.70  | 21.69 | 19  | 42   | 378  | 43.8  | 8.38  |
| Q99MY8   | Histone-lysine N-methyltransferase ASH1L OS=Mus musculus GN=Ash1l PE=1 SV=3 - [ASH1L_MOUSE]                       | 2.37  | 1  | 5  | 5   | 5    | 1.775 | 1.036 | 0.917 | 0.963 | 6.44    | 2.37  | 5   | 5    | 2958 | 331.1 | 9.35  |
| Q9DC51   | Guanine nucleotide-binding protein G(k) subunit alpha OS=Mus musculus GN=Gna13 PE=1 SV=3 - [GNAI3_MOUSE]          | 48.31 | 6  | 6  | 15  | 272  | 0.780 | 0.954 | 1.041 | 0.963 | 759.78  | 48.31 | 28  | 272  | 354  | 40.5  | 5.69  |



|          |                                                                                                                              |       |   |    |    |     |       |       |       |       |         |       |    |     |      |       |       |
|----------|------------------------------------------------------------------------------------------------------------------------------|-------|---|----|----|-----|-------|-------|-------|-------|---------|-------|----|-----|------|-------|-------|
| P70188-2 | Isoform KAP3B of Kinesin-associated protein 3<br>OS=Mus musculus<br>GN=Kifap3 - [KIFA3_MOUSE]                                | 27.72 | 2 | 16 | 19 | 49  | 0.798 | 1.216 | 1.049 | 0.963 | 134.83  | 27.72 | 32 | 49  | 772  | 89.0  | 5.20  |
| Q9Z1J2-2 | Isoform 2 of Serine/threonine-protein kinase Nek4 OS=Mus musculus GN=Nek4 - [NEK4_MOUSE]                                     | 13.04 | 3 | 6  | 7  | 13  | 1.023 | 0.888 | 0.760 | 0.963 | 28.36   | 13.04 | 9  | 13  | 744  | 83.5  | 6.95  |
| Q8CAG6   | Plectstrin OS=Mus musculus GN=Plek PE=2 SV=1 - [Q8CAG6_MOUSE]                                                                | 6.42  | 2 | 2  | 2  | 4   | 1.662 | 1.732 | 1.001 | 0.963 | 8.14    | 6.42  | 4  | 4   | 327  | 37.1  | 7.43  |
| P51660   | Peroxisomal multifunctional enzyme type 2 OS=Mus musculus GN=Hsd17b4 PE=1 SV=3 - [DHB4_MOUSE]                                | 33.06 | 1 | 20 | 20 | 103 | 0.718 | 0.608 | 0.751 | 0.963 | 328.46  | 33.06 | 36 | 103 | 735  | 79.4  | 8.57  |
| P98203-4 | Isoform 4 of Armadillo repeat protein deleted in velo-cardio-facial syndrome homolog OS=Mus musculus GN=Arvcf - [ARVC_MOUSE] | 32.74 | 5 | 22 | 22 | 69  | 0.686 | 1.010 | 0.905 | 0.963 | 180.51  | 32.74 | 37 | 69  | 892  | 97.1  | 6.79  |
| E9QK16   | Protocadherin Fat 3 OS=Mus musculus GN=Fat3 PE=2 SV=1 - [E9QK16_MOUSE]                                                       | 4.00  | 3 | 13 | 15 | 27  | 1.217 | 0.968 | 0.997 | 0.963 | 65.50   | 4.00  | 20 | 27  | 4551 | 501.3 | 4.87  |
| Q4VAC9-2 | Isoform 2 of Plectstrin homology domain-containing family G member 3 OS=Mus musculus GN=Plekdg3 - [Plekdg3_MOUSE]            | 4.63  | 6 | 3  | 4  | 11  | 0.987 | 0.563 | 1.015 | 0.963 | 28.28   | 4.63  | 6  | 11  | 1340 | 148.3 | 5.62  |
| Q9D3E6   | Cohesin subunit SA-1 OS=Mus musculus GN=Stag1 PE=1 SV=3 - [STAG1_MOUSE]                                                      | 7.87  | 9 | 5  | 11 | 18  | 0.874 | 0.861 | 0.887 | 0.963 | 42.98   | 7.87  | 15 | 18  | 1258 | 144.3 | 5.59  |
| Q9R1L5   | Microtubule-associated serine/threonine-protein kinase 1 OS=Mus musculus GN=Mast1 PE=1 SV=3 - [MAST1_MOUSE]                  | 26.69 | 4 | 28 | 33 | 109 | 1.006 | 0.813 | 1.025 | 0.963 | 331.29  | 26.69 | 57 | 109 | 1570 | 170.9 | 8.44  |
| Q9WV92-2 | Isoform 2 of Band 4.1-like protein 3 OS=Mus musculus GN=Epb41l3 - [E41L3_MOUSE]                                              | 50.69 | 4 | 4  | 47 | 449 | 1.090 | 0.996 | 1.327 | 0.963 | 1371.09 | 50.69 | 84 | 449 | 939  | 104.5 | 5.50  |
| Q8CI61   | BAG family molecular chaperone regulator 4 OS=Mus musculus GN=Bag4 PE=1 SV=2 - [BAG4_MOUSE]                                  | 20.35 | 1 | 7  | 7  | 28  | 1.688 | 1.440 | 1.504 | 0.964 | 67.73   | 20.35 | 13 | 28  | 457  | 49.1  | 5.34  |
| F6Q8N8   | Protein Gm6772 OS=Mus musculus GN=Gm6772 PE=4 SV=2 - [F6Q8N8_MOUSE]                                                          | 3.08  | 1 | 1  | 1  | 1   | 1.518 | 1.220 | 1.685 | 0.964 | 1.64    | 3.08  | 1  | 1   | 487  | 54.1  | 4.96  |
| Q9CQL6   | 39S ribosomal protein L35, mitochondrial OS=Mus musculus GN=Mrip35 PE=2 SV=1 - [RM35_MOUSE]                                  | 7.45  | 1 | 1  | 1  | 2   | 1.231 | 1.062 | 0.910 | 0.964 | 9.15    | 7.45  | 2  | 2   | 188  | 21.5  | 11.47 |
| Q9CR23   | Transmembrane protein 9 OS=Mus musculus GN=Tmem9 PE=2 SV=1 - [TMEM9_MOUSE]                                                   | 14.75 | 1 | 2  | 3  | 18  | 0.842 | 0.734 | 0.695 | 0.964 | 47.97   | 14.75 | 5  | 18  | 183  | 20.6  | 6.95  |
| Q5FWH7   | Zinc transporter ZIP12 OS=Mus musculus GN=Slc39a12 PE=2 SV=1 - [S39AC_MOUSE]                                                 | 13.35 | 4 | 9  | 9  | 30  | 0.745 | 0.532 | 0.720 | 0.964 | 82.61   | 13.35 | 16 | 30  | 689  | 76.2  | 5.77  |
| Q8CFG9   | Complement C1-B subcomponent OS=Mus musculus GN=C1rb PE=2 SV=1 - [C1RB_MOUSE]                                                | 3.68  | 2 | 1  | 1  | 1   | 2.462 | 1.897 | 0.763 | 0.964 | 2.40    | 3.68  | 1  | 1   | 706  | 79.9  | 5.81  |
| A2AR14-2 | Isoform 2 of Leucine-rich repeat-containing G-protein coupled receptor 4 OS=Mus musculus GN=Lgr4 - [LGR4_MOUSE]              | 2.48  | 2 | 2  | 3  | 4   | 1.085 | 1.176 | 1.184 | 0.964 | 3.80    | 2.48  | 3  | 4   | 927  | 101.3 | 6.35  |
| Q91Y82   | Kallikrein 6, isoform CRA_a OS=Mus musculus GN=Kik6 PE=2 SV=1 - [Q91Y82_MOUSE]                                               | 15.42 | 1 | 2  | 2  | 9   | 4.816 | 0.604 | 1.074 | 0.964 | 37.15   | 15.42 | 4  | 9   | 253  | 28.3  | 7.93  |
| Q6IQX7   | Chondroitin sulfate synthase 2 OS=Mus musculus GN=Chpf PE=2 SV=1 - [CHSS2_MOUSE]                                             | 6.59  | 4 | 4  | 4  | 7   | 1.135 | 0.901 | 0.936 | 0.964 | 24.80   | 6.59  | 7  | 7   | 774  | 85.5  | 6.84  |
| Q9D0I9   | Arginine-tRNA ligase, cytoplasmic OS=Mus musculus GN=Rars PE=2 SV=2 - [SYRC_MOUSE]                                           | 43.48 | 1 | 27 | 27 | 111 | 0.723 | 0.960 | 0.774 | 0.964 | 309.73  | 43.48 | 46 | 111 | 660  | 75.6  | 7.55  |
| Q8R1R3   | STAR-related lipid transfer protein 7, mitochondrial OS=Mus musculus GN=Stard7 PE=2 SV=2 - [STAR7_MOUSE]                     | 5.90  | 2 | 2  | 2  | 3   | 1.115 | 1.293 | 0.815 | 0.964 | 5.74    | 5.90  | 3  | 3   | 373  | 43.1  | 8.95  |
| Q3V3W4   | Protein Zbtb2 OS=Mus musculus GN=Zbtb2 PE=2 SV=1 - [Q3V3W4_MOUSE]                                                            | 1.17  | 1 | 1  | 1  | 2   | 1.742 | 1.340 | 0.968 | 0.964 | 4.88    | 1.17  | 1  | 2   | 514  | 57.2  | 6.01  |
| P52189   | Inward rectifier potassium channel 4 OS=Mus musculus GN=Kcnj4 PE=1 SV=1 - [IRK4_MOUSE]                                       | 9.21  | 2 | 3  | 3  | 11  | 1.444 | 2.862 | 3.290 | 0.964 | 27.16   | 9.21  | 5  | 11  | 445  | 49.9  | 6.21  |
| Q9D4J1   | EF-hand domain-containing protein D1 OS=Mus musculus GN=Effh1 PE=2 SV=1 -                                                    | 28.75 | 1 | 3  | 6  | 60  | 2.277 | 0.823 | 0.981 | 0.964 | 147.16  | 28.75 | 10 | 60  | 240  | 27.0  | 6.02  |

|          |                                                                                                                             |       |    |    |    |     |       |       |       |       |        |       |    |     |      |       |       |
|----------|-----------------------------------------------------------------------------------------------------------------------------|-------|----|----|----|-----|-------|-------|-------|-------|--------|-------|----|-----|------|-------|-------|
| E9QLP0   | Tubulin polyglutamylase complex subunit 2<br>OS=Mus musculus<br>GN=Tpgs2 PE=2 SV=1 - [E9QLP0_MOUSE]                         | 10.81 | 2  | 3  | 3  | 19  | 0.562 | 0.823 | 0.860 | 0.964 | 49.62  | 10.81 | 6  | 19  | 296  | 33.2  | 7.24  |
| A2AWP8-4 | isoform 4 of Rho guanine nucleotide exchange factor 10-like protein OS=Mus musculus GN=Arhgef10l - [ARGAL_MOUSE]            | 6.12  | 10 | 7  | 8  | 16  | 0.981 | 0.790 | 0.836 | 0.964 | 46.86  | 6.12  | 13 | 16  | 1275 | 139.3 | 5.74  |
| Q3UHC7-2 | Isoform 2 of Disabled homolog 2-interacting protein OS=Mus musculus GN=Dab2ip [DAB2P_MOUSE]                                 | 24.69 | 9  | 19 | 25 | 86  | 0.886 | 0.851 | 1.136 | 0.964 | 233.70 | 24.69 | 43 | 86  | 1065 | 117.6 | 6.79  |
| P59470   | DNA-directed RNA polymerase III subunit RPC2 OS=Mus musculus GN=Polr3b PE=2 SV=2 - [RPC2_MOUSE]                             | 4.06  | 1  | 5  | 5  | 8   | 1.079 | 0.866 | 1.085 | 0.964 | 14.13  | 4.06  | 6  | 8   | 1133 | 127.6 | 8.50  |
| Q9QX1-2  | Isoform 2 of Amyloid beta A4 precursor protein-binding family B member 1 OS=Mus musculus GN=Apbb1 - [APOB1_MOUSE]           | 31.21 | 3  | 13 | 15 | 44  | 0.914 | 1.055 | 1.044 | 0.964 | 143.15 | 31.21 | 27 | 44  | 708  | 77.1  | 4.97  |
| Q62443   | Neuronal pentraxin-1 OS=Mus musculus GN=Nptx1 PE=2 SV=1 - [NPTX1_MOUSE]                                                     | 33.56 | 1  | 13 | 15 | 54  | 1.205 | 1.984 | 1.127 | 0.964 | 169.15 | 33.56 | 25 | 54  | 432  | 47.1  | 6.44  |
| Q9WUK4   | Replication factor C subunit 2 OS=Mus musculus GN=Rfc2 PE=2 SV=1 - [RFC2_MOUSE]                                             | 5.44  | 1  | 2  | 2  | 3   | 0.889 | 1.357 | 0.939 | 0.964 | 7.99   | 5.44  | 3  | 3   | 349  | 38.7  | 6.44  |
| Q3TX4    | Vesicular glutamate transporter 1 OS=Mus musculus GN=Slc17a7 PE=2 SV=2 -                                                    | 15.54 | 3  | 7  | 7  | 60  | 0.414 | 2.438 | 1.840 | 0.964 | 132.64 | 15.54 | 13 | 60  | 560  | 61.6  | 7.34  |
| Q9R0A0   | Peroxisomal membrane protein PEX14 OS=Mus musculus GN=Pex14 PE=1 SV=1 - [PEX14_MOUSE]                                       | 17.55 | 2  | 6  | 6  | 16  | 0.717 | 0.907 | 0.773 | 0.964 | 43.71  | 17.55 | 10 | 16  | 376  | 41.2  | 5.11  |
| Q3KNY0   | Immunoglobulin-like and fibronectin type III domain containing protein 1 OS=Mus musculus GN=Igfn1 PE=1 SV=3 - [FN3A1_MOUSE] | 1.68  | 7  | 3  | 3  | 4   | 1.081 | 1.008 | 0.969 | 0.965 | 5.02   | 1.68  | 3  | 4   | 2849 | 303.5 | 6.58  |
| Q3TKX1   | ATPase, H+ transporting, lysosomal accessory protein OS=Mus musculus GN=Atp6ap1 PE=2 SV=1 - [Q3TKX1_MOUSE]                  | 23.61 | 6  | 8  | 8  | 24  | 0.943 | 1.208 | 0.949 | 0.965 | 69.90  | 23.61 | 15 | 24  | 415  | 45.5  | 5.63  |
| O55143   | Sarcoplasmic/endoplasmic reticulum calcium ATPase 2 OS=Mus musculus GN=Atp2a2 PE=1 SV=2 - [AT2A2_MOUSE]                     | 51.25 | 4  | 39 | 48 | 285 | 0.535 | 0.869 | 1.156 | 0.965 | 890.06 | 51.25 | 84 | 285 | 1044 | 114.8 | 5.34  |
| Q80W71-2 | Isoform 2 of Pleckstrin homology domain-containing family A member 8 OS=Mus musculus GN=Plekha8 - [PLEKHA8_MOUSE]           | 2.53  | 2  | 1  | 1  | 3   | 1.007 | 1.741 | 0.889 | 0.965 | 2.93   | 2.53  | 2  | 3   | 474  | 52.7  | 4.87  |
| A2AVP4   | RING finger and CCHC-type zinc finger domain-containing protein 2 OS=Mus musculus GN=Rc3h2 PE=2 SV=1 - [R3H2_MOUSE]         | 4.62  | 2  | 3  | 4  | 6   | 1.671 | 0.990 | 1.060 | 0.965 | 16.28  | 4.62  | 5  | 6   | 1125 | 124.6 | 7.20  |
| Q69226   | Contactin-4 OS=Mus musculus GN=Cntn4 PE=2 SV=2 - [CNTN4_MOUSE]                                                              | 12.96 | 4  | 11 | 12 | 26  | 0.762 | 1.133 | 1.093 | 0.965 | 66.88  | 12.96 | 17 | 26  | 1026 | 113.4 | 7.36  |
| B1ARA3   | 60S ribosomal protein L26 (Fragment) OS=Mus musculus GN=Rpl26 PE=2 SV=1 - [B1ARA3_MOUSE]                                    | 47.57 | 4  | 6  | 6  | 31  | 0.624 | 0.854 | 0.856 | 0.965 | 75.53  | 47.57 | 11 | 31  | 103  | 12.2  | 10.92 |
| Q03173   | Protein enabled homolog OS=Mus musculus GN=Enah PE=1 SV=2 - [ENAH_MOUSE]                                                    | 28.80 | 6  | 1  | 19 | 117 | 1.872 | 0.848 | 0.950 | 0.965 | 288.29 | 28.80 | 29 | 117 | 802  | 85.8  | 7.72  |
| A2A9W1   | MIF4G domain-containing protein (Fragment) OS=Mus musculus GN=Mif4gd PE=2 SV=1 - [A2A9W1_MOUSE]                             | 39.51 | 4  | 5  | 5  | 7   | 1.236 | 0.951 | 0.948 | 0.965 | 14.73  | 39.51 | 7  | 7   | 162  | 18.6  | 5.14  |
| Q99JW1-2 | Isoform 2 of Alpha/beta hydrolase domain-containing protein 17A OS=Mus musculus GN=Abhd17a - [ABD17A_MOUSE]                 | 16.67 | 2  | 2  | 3  | 13  | 0.769 | 0.631 | 1.221 | 0.965 | 38.55  | 16.67 | 6  | 13  | 246  | 26.9  | 6.95  |
| P70451-2 | Isoform 2 of Tyrosine-protein kinase Fer OS=Mus musculus GN=Fer - [FER_MOUSE]                                               | 10.98 | 5  | 7  | 9  | 22  | 0.910 | 0.900 | 0.806 | 0.965 | 58.22  | 10.98 | 14 | 22  | 765  | 87.7  | 6.77  |
| Q8BU04   | Putative E3 ubiquitin-protein ligase UBR7 OS=Mus musculus GN=Ubr7 PE=2 SV=1 -                                               | 7.06  | 2  | 3  | 3  | 10  | 1.383 | 1.188 | 1.157 | 0.965 | 23.92  | 7.06  | 6  | 10  | 425  | 48.0  | 4.75  |
| Q8C1W1   | Vasohibin-1 OS=Mus musculus GN=Vash1 PE=2 SV=4 - [VASH1_MOUSE]                                                              | 10.40 | 1  | 3  | 4  | 5   | 0.813 | 0.768 | 0.964 | 0.965 | 6.64   | 10.40 | 5  | 5   | 375  | 41.8  | 9.39  |
| Q555I6   | U3 small nuclear RNA-associated protein 18 homolog OS=Mus musculus GN=Utp18 PE=1 SV=1 - [UTP18_MOUSE]                       | 11.05 | 1  | 3  | 3  | 6   | 0.898 | 0.806 | 1.281 | 0.965 | 16.45  | 11.05 | 4  | 6   | 552  | 61.2  | 8.78  |

|          |                                                                                                                               |       |    |    |    |     |       |       |       |       |         |       |     |     |      |       |      |
|----------|-------------------------------------------------------------------------------------------------------------------------------|-------|----|----|----|-----|-------|-------|-------|-------|---------|-------|-----|-----|------|-------|------|
| A2RTT5   | Protein Vmn1r232<br>OS=Mus musculus<br>GN=Vmn1r232 PE=2<br>SV=1 - [A2RTT5_MOUSE]                                              | 5.98  | 1  | 1  | 1  | 1   | 2.813 | 1.167 | 1.640 | 0.965 | 3.74    | 5.98  | 1   | 1   | 351  | 40.3  | 9.16 |
| D3Z2P2   | Chitinase-3-like protein 1<br>OS=Mus musculus<br>GN=Chi3l1 PE=2 SV=1 -<br>[D3Z2P2_MOUSE]                                      | 7.92  | 4  | 2  | 2  | 6   | 1.395 | 1.230 | 0.947 | 0.965 | 11.32   | 7.92  | 4   | 6   | 379  | 42.8  | 8.41 |
| P15209   | BDNF/NT-3 growth factors<br>receptor OS=Mus<br>musculus GN=Ntrk2 PE=1<br>SV=1 - [NTRK2_MOUSE]                                 | 25.58 | 3  | 5  | 19 | 102 | 0.641 | 1.676 | 1.063 | 0.966 | 297.36  | 25.58 | 33  | 102 | 821  | 92.1  | 6.55 |
| O89001   | Carboxypeptidase D<br>OS=Mus musculus<br>GN=Cpd PE=1 SV=2 -<br>[CBPD_MOUSE]                                                   | 16.19 | 2  | 20 | 21 | 58  | 1.355 | 1.286 | 0.992 | 0.966 | 144.13  | 16.19 | 33  | 58  | 1377 | 152.3 | 6.18 |
| Q616G8   | E3 ubiquitin-protein ligase<br>HECW2 OS=Mus musculus<br>GN=Hecw2 PE=2 SV=1 -<br>[HECW2_MOUSE]                                 | 15.46 | 4  | 20 | 23 | 54  | 0.669 | 0.844 | 1.107 | 0.966 | 152.73  | 15.46 | 40  | 54  | 1578 | 176.1 | 5.41 |
| J3QM95   | FSD1-like protein OS=Mus<br>musculus GN=Fsd1 PE=4<br>SV=1 - [J3QM95_MOUSE]                                                    | 34.61 | 6  | 15 | 15 | 51  | 1.084 | 1.076 | 0.970 | 0.966 | 146.21  | 34.61 | 26  | 51  | 497  | 55.8  | 6.40 |
| Q78RX3   | Small integral membrane<br>protein 12 OS=Mus<br>musculus GN=Srim12<br>PE=3 SV=1 -                                             | 18.48 | 1  | 2  | 2  | 6   | 0.635 | 0.708 | 1.062 | 0.966 | 16.22   | 18.48 | 4   | 6   | 92   | 10.8  | 9.04 |
| E9QQ33   | E3 ubiquitin-protein ligase<br>SH3RF1 OS=Mus musculus<br>GN=Sh3rf1 PE=4 SV=1 -<br>[E9QQ33_MOUSE]                              | 14.14 | 6  | 9  | 12 | 26  | 1.110 | 1.156 | 1.225 | 0.966 | 61.42   | 14.14 | 21  | 26  | 891  | 93.3  | 8.48 |
| A2AN08-3 | Isoform 3 of E3 ubiquitin-<br>protein ligase UBR4<br>OS=Mus musculus<br>GN=Ubr4 -                                             | 18.25 | 6  | 74 | 76 | 255 | 0.679 | 0.903 | 0.893 | 0.966 | 706.74  | 18.25 | 131 | 255 | 5156 | 569.9 | 6.06 |
| Q80WQ8   | Mis18-binding protein 1<br>OS=Mus musculus<br>GN=Mis18bp1 PE=1 SV=1<br>- [M18BP_MOUSE]                                        | 3.91  | 3  | 3  | 3  | 6   | 0.854 | 1.428 | 0.830 | 0.966 | 6.17    | 3.91  | 3   | 6   | 998  | 113.9 | 9.09 |
| P16092-4 | Isoform 4 of Fibroblast<br>growth factor receptor 1<br>OS=Mus musculus<br>GN=Fgfr1 -                                          | 4.24  | 21 | 1  | 3  | 23  | 1.004 | 1.110 | 1.185 | 0.966 | 49.01   | 4.24  | 5   | 23  | 731  | 81.8  | 6.57 |
| G3XA17   | Eukaryotic translation<br>initiation factor 4 gamma 2<br>OS=Mus musculus<br>GN=EIF4g2 PE=4 SV=1 -<br>[G3XA17_MOUSE]           | 31.13 | 7  | 24 | 24 | 116 | 0.824 | 0.998 | 0.963 | 0.966 | 312.81  | 31.13 | 41  | 116 | 906  | 102.0 | 7.14 |
| Q03517   | Secretogranin-2 OS=Mus<br>musculus GN=Scg2 PE=1<br>SV=1 - [SCG2_MOUSE]                                                        | 52.84 | 1  | 26 | 27 | 496 | 1.577 | 0.942 | 0.800 | 0.966 | 1208.53 | 52.84 | 47  | 496 | 617  | 70.6  | 4.75 |
| D3Z2Z6   | Probable phospholipid-<br>transporting ATPase 1B<br>(Fragment) OS=Mus<br>musculus GN=Atp8a2<br>PE=2 SV=1 -<br>[D3Z2Z6_MOUSE]  | 45.21 | 1  | 1  | 3  | 10  | 1.034 | 0.744 | 0.863 | 0.966 | 31.10   | 45.21 | 6   | 10  | 73   | 8.0   | 9.72 |
| Q8VCY6   | U3 small nucleolar RNA-<br>associated protein 6<br>homolog OS=Mus<br>musculus GN=Utp6 PE=2<br>SV=1 - [UTP6_MOUSE]             | 2.18  | 1  | 1  | 1  | 2   | 0.877 | 0.820 | 0.742 | 0.966 | 5.36    | 2.18  | 2   | 2   | 597  | 70.4  | 7.71 |
| Q9JKC7   | AP-4 complex subunit mu-<br>1 OS=Mus musculus<br>GN=Ap4m1 PE=2 SV=1 -<br>[AP4M1_MOUSE]                                        | 7.57  | 3  | 3  | 3  | 5   | 0.846 | 0.768 | 0.788 | 0.966 | 14.96   | 7.57  | 5   | 5   | 449  | 49.5  | 6.64 |
| Q9JLV1   | BAG family molecular<br>chaperone regulator 3<br>OS=Mus musculus<br>GN=Bag3 PE=1 SV=2 -<br>[BAG3_MOUSE]                       | 35.18 | 1  | 15 | 15 | 56  | 2.540 | 0.893 | 1.049 | 0.966 | 162.80  | 35.18 | 27  | 56  | 577  | 61.8  | 7.27 |
| J3QMM7   | ATP-dependent (S)-<br>NAD(P)H-hydrate<br>dehydratase OS=Mus<br>musculus GN=Carkd PE=3<br>SV=1 - [J3QMM7_MOUSE]                | 52.91 | 7  | 12 | 12 | 131 | 1.594 | 1.031 | 0.825 | 0.966 | 392.10  | 52.91 | 23  | 131 | 327  | 35.1  | 8.13 |
| Q9D8T3   | Coiled-coil domain-<br>containing protein 97<br>OS=Mus musculus<br>GN=Ccdc97 PE=1 SV=1 -<br>[CCD97_MOUSE]                     | 19.41 | 1  | 5  | 5  | 11  | 0.826 | 0.877 | 1.074 | 0.967 | 37.58   | 19.41 | 8   | 11  | 340  | 38.7  | 4.60 |
| Q8JZW4   | Copine-5 OS=Mus<br>musculus GN=Cpne5 PE=2<br>SV=1 - [CPNE5_MOUSE]                                                             | 33.05 | 2  | 3  | 17 | 124 | 1.313 | 1.605 | 1.421 | 0.967 | 340.37  | 33.05 | 30  | 124 | 593  | 65.6  | 5.77 |
| P83940   | Transcription elongation<br>factor B polypeptide 1<br>OS=Mus musculus<br>GN=Tceb1 PE=1 SV=1 -<br>[ELOC_MOUSE]                 | 66.07 | 1  | 7  | 7  | 51  | 0.997 | 0.939 | 1.018 | 0.967 | 199.60  | 66.07 | 12  | 51  | 112  | 12.5  | 4.78 |
| H3BK39   | Rap guanine nucleotide<br>exchange factor 3<br>OS=Mus musculus<br>GN=Rapgef3 PE=2 SV=1 -<br>[H3BK39_MOUSE]                    | 6.11  | 5  | 3  | 6  | 17  | 0.996 | 0.841 | 0.814 | 0.967 | 46.33   | 6.11  | 11  | 17  | 884  | 100.1 | 8.07 |
| O88384   | Vesicle transport through<br>interaction with t-SNAREs<br>homolog 1B OS=Mus<br>musculus GN=Vti1b PE=1<br>SV=1 - [VTI1B_MOUSE] | 40.95 | 5  | 8  | 8  | 45  | 0.911 | 1.009 | 0.975 | 0.967 | 145.06  | 40.95 | 13  | 45  | 232  | 26.7  | 8.79 |
| Q6ZWQ5   | Sorting nexin 12, isoform<br>CRA_c OS=Mus musculus<br>GN=Snx12 PE=2 SV=1 -<br>[Q6ZWQ5_MOUSE]                                  | 61.11 | 4  | 8  | 10 | 44  | 0.956 | 1.015 | 1.064 | 0.967 | 113.11  | 61.11 | 19  | 44  | 162  | 18.9  | 8.44 |
| Q9WVK4   | EH domain-containing<br>protein 1 OS=Mus<br>musculus GN=Ehd1 PE=1<br>SV=1 - [EHD1_MOUSE]                                      | 61.42 | 1  | 19 | 31 | 184 | 0.813 | 1.041 | 0.918 | 0.967 | 554.12  | 61.42 | 58  | 184 | 534  | 60.6  | 6.83 |

|          |                                                                                                                          |       |   |    |    |     |       |       |       |       |         |       |    |     |      |       |      |
|----------|--------------------------------------------------------------------------------------------------------------------------|-------|---|----|----|-----|-------|-------|-------|-------|---------|-------|----|-----|------|-------|------|
| Q8BH48-2 | Isoform 2 of Ubiquitin-associated protein 1<br>OS=Mus musculus<br>GN=Ubp1 -                                              | 22.90 | 3 | 6  | 7  | 30  | 1.890 | 1.029 | 1.343 | 0.967 | 76.84   | 22.90 | 12 | 30  | 441  | 48.2  | 5.07 |
| Q99P88   | Nuclear pore complex protein Nup155 OS=Mus musculus GN=Nup155<br>PE=2 SV=1 -<br>[NU155_MOUSE]                            | 17.54 | 7 | 19 | 20 | 56  | 0.787 | 1.061 | 0.890 | 0.967 | 154.90  | 17.54 | 33 | 56  | 1391 | 155.0 | 6.15 |
| Q3UMR5   | Calcium uniporter protein, mitochondrial OS=Mus musculus GN=Mcu PE=1<br>SV=2 - [MCU_MOUSE]                               | 31.71 | 2 | 10 | 10 | 49  | 0.848 | 1.438 | 1.150 | 0.967 | 153.05  | 31.71 | 19 | 49  | 350  | 39.7  | 8.56 |
| B1AZP2-2 | Isoform 2 of Disks large-associated protein 4<br>OS=Mus musculus<br>GN=Dlgap4 -                                          | 30.84 | 9 | 16 | 25 | 133 | 0.581 | 1.101 | 1.522 | 0.967 | 366.67  | 30.84 | 45 | 133 | 989  | 107.5 | 7.30 |
| Q9QZ23   | NFU1 iron-sulfur cluster scaffold homolog, mitochondrial OS=Mus musculus GN=Nfu1 PE=1<br>SV=2 - [NFU1_MOUSE]             | 28.63 | 1 | 2  | 6  | 42  | 2.028 | 1.096 | 1.247 | 0.967 | 121.85  | 28.63 | 10 | 42  | 255  | 28.5  | 5.03 |
| P30416   | Peptidyl-prolyl cis-trans isomerase FKBP4 OS=Mus musculus GN=Fkbp4 PE=1<br>SV=5 - [FKBP4_MOUSE]                          | 44.32 | 4 | 20 | 20 | 114 | 1.253 | 0.830 | 0.864 | 0.967 | 300.89  | 44.32 | 35 | 114 | 458  | 51.5  | 5.72 |
| Q61285   | ATP-binding cassette sub-family D member 2<br>OS=Mus musculus<br>GN=Abcd2 PE=1 SV=1 -<br>[ABCD2_MOUSE]                   | 11.07 | 2 | 6  | 6  | 10  | 1.276 | 0.680 | 0.821 | 0.967 | 31.61   | 11.07 | 8  | 10  | 741  | 83.4  | 9.09 |
| F7BPE8   | Protein Zkscan2 (Fragment) OS=Mus musculus GN=Zkscan2<br>PE=4 SV=1 -                                                     | 14.29 | 1 | 1  | 1  | 1   | 0.353 | 1.304 | 0.698 | 0.967 | 2.34    | 14.29 | 1  | 1   | 42   | 4.8   | 8.75 |
| Q5NCP6   | Peripheral-type benzodiazepine receptor-associated protein 1<br>OS=Mus musculus<br>GN=Bzap1 PE=2 SV=1 -<br>[BZAP1_MOUSE] | 2.07  | 7 | 2  | 4  | 11  | 0.899 | 0.611 | 1.130 | 0.967 | 24.89   | 2.07  | 5  | 11  | 1786 | 193.3 | 5.19 |
| Q91V14   | Solute carrier family 12 member 5 OS=Mus musculus GN=Slc12a5<br>PE=1 SV=2 -                                              | 28.21 | 3 | 28 | 34 | 334 | 0.629 | 0.903 | 1.062 | 0.967 | 1051.56 | 28.21 | 59 | 334 | 1138 | 126.2 | 6.74 |
| E9Q3Y4   | Lipopolysaccharide-responsive and beige-like anchor protein OS=Mus musculus GN=Lrba PE=2<br>SV=1 - [E9Q3Y4_MOUSE]        | 11.91 | 4 | 22 | 29 | 78  | 0.714 | 1.019 | 1.090 | 0.967 | 218.11  | 11.91 | 48 | 78  | 2854 | 316.6 | 5.54 |
| P28481-4 | Isoform 4 of Collagen alpha-1(II) chain OS=Mus musculus GN=Col2a1 -<br>[CO2A1_MOUSE]                                     | 17.35 | 7 | 11 | 11 | 14  | 0.785 | 3.578 | 1.288 | 0.967 | 33.17   | 17.35 | 13 | 14  | 1458 | 138.9 | 7.09 |
| E9QMY1   | OX-2 membrane glycoprotein OS=Mus musculus GN=Cd200<br>PE=2 SV=1 -                                                       | 23.05 | 5 | 7  | 7  | 47  | 0.664 | 1.234 | 0.866 | 0.967 | 124.63  | 23.05 | 14 | 47  | 269  | 30.3  | 8.51 |
| Q99J27   | Acetyl-coenzyme A transporter 1 OS=Mus musculus GN=Slc33a1<br>PE=1 SV=1 -                                                | 12.36 | 1 | 6  | 6  | 12  | 0.770 | 0.787 | 1.068 | 0.967 | 32.84   | 12.36 | 9  | 12  | 550  | 61.0  | 8.16 |
| Q9EQQ9-3 | Isoform 3 of Bifunctional protein NCOAT OS=Mus musculus GN=Mgea5 -<br>[NCOAT_MOUSE]                                      | 32.49 | 3 | 26 | 27 | 78  | 0.942 | 1.225 | 1.007 | 0.967 | 203.59  | 32.49 | 42 | 78  | 954  | 107.3 | 5.12 |
| Q91XY5   | Protein Pcdhgb6 OS=Mus musculus GN=Pcdhga3<br>PE=2 SV=1 -<br>[Q91XY5_MOUSE]                                              | 11.64 | 1 | 4  | 7  | 24  | 1.502 | 1.115 | 1.345 | 0.967 | 69.03   | 11.64 | 11 | 24  | 928  | 100.1 | 4.98 |
| O35691   | Pinin OS=Mus musculus GN=Pnn PE=1 SV=4 -<br>[PININ_MOUSE]                                                                | 15.31 | 2 | 12 | 12 | 26  | 0.737 | 0.845 | 0.963 | 0.967 | 76.56   | 15.31 | 19 | 26  | 725  | 82.4  | 7.01 |
| P35585   | AP-1 complex subunit mu-1 OS=Mus musculus GN=Ap1m1 PE=1 SV=3 -<br>[AP1M1_MOUSE]                                          | 48.46 | 2 | 15 | 18 | 91  | 0.738 | 0.879 | 0.946 | 0.968 | 224.59  | 48.46 | 32 | 91  | 423  | 48.5  | 7.30 |
| P45700   | Mannosyl-oligosaccharide 1,2-alpha-mannosidase IA<br>OS=Mus musculus<br>GN=Man1a1 PE=1 SV=1 -<br>[MA1A1_MOUSE]           | 2.75  | 1 | 2  | 2  | 4   | 1.282 | 0.762 | 0.820 | 0.968 | 7.10    | 2.75  | 4  | 4   | 655  | 73.2  | 6.81 |
| Q9R0Q7   | Prostaglandin E synthase 3<br>OS=Mus musculus<br>GN=Ptges3 PE=1 SV=1 -<br>[TEBP_MOUSE]                                   | 51.25 | 2 | 9  | 9  | 96  | 1.266 | 0.825 | 1.102 | 0.968 | 285.03  | 51.25 | 18 | 96  | 160  | 18.7  | 4.55 |
| Q80Y17   | Lethal(2) giant larvae protein homolog 1<br>OS=Mus musculus<br>GN=Lgl1 PE=1 SV=1 -<br>[L2GL1_MOUSE]                      | 36.39 | 1 | 27 | 28 | 117 | 0.897 | 0.464 | 0.819 | 0.968 | 404.29  | 36.39 | 49 | 117 | 1036 | 112.5 | 6.48 |
| E9PUF7   | Rho guanine nucleotide exchange factor 1 OS=Mus musculus GN=Arhgef1<br>PE=2 SV=1 -<br>[E9PUF7_MOUSE]                     | 18.65 | 7 | 14 | 14 | 36  | 0.915 | 0.995 | 0.855 | 0.968 | 110.52  | 18.65 | 24 | 36  | 976  | 108.6 | 6.09 |
| Q3UXZ6   | Protein FAM81A OS=Mus musculus GN=Fam81a<br>PE=2 SV=2 -<br>[FA81A_MOUSE]                                                 | 44.23 | 5 | 14 | 15 | 34  | 0.794 | 5.093 | 1.719 | 0.968 | 88.54   | 44.23 | 24 | 34  | 364  | 41.7  | 8.75 |
| P32921   | Tryptophan-tRNA ligase, cytoplasmic OS=Mus musculus GN=Wars PE=1<br>SV=2 - [SYWC_MOUSE]                                  | 48.65 | 1 | 1  | 22 | 181 | 0.457 | 0.973 | 0.921 | 0.968 | 519.96  | 48.65 | 38 | 181 | 481  | 54.3  | 6.89 |
| E9PUM9   | Protein Nrnx2 OS=Mus musculus GN=Nrxn2 PE=2<br>SV=1 - [E9PUM9_MOUSE]                                                     | 26.48 | 8 | 31 | 38 | 158 | 0.752 | 0.993 | 0.845 | 0.968 | 498.14  | 26.48 | 70 | 158 | 1703 | 183.9 | 5.82 |

|          |                                                                                                                                  |       |    |    |     |     |       |       |       |       |         |       |     |     |      |       |       |
|----------|----------------------------------------------------------------------------------------------------------------------------------|-------|----|----|-----|-----|-------|-------|-------|-------|---------|-------|-----|-----|------|-------|-------|
| Q80Z0    | Protein Sec24b OS=Mus musculus GN=Sec24b PE=2 SV=1 - [Q80Z0_MOUSE]                                                               | 19.58 | 3  | 18 | 18  | 93  | 1.011 | 0.950 | 1.014 | 0.968 | 277.43  | 19.58 | 32  | 93  | 1251 | 135.5 | 6.96  |
| Q8BGD8   | Cytochrome c oxidase assembly factor 6 homolog OS=Mus musculus GN=Coa6 PE=1 SV=1 - [COA6_MOUSE]                                  | 46.84 | 1  | 4  | 4   | 21  | 1.759 | 1.119 | 1.240 | 0.968 | 70.08   | 46.84 | 6   | 21  | 79   | 9.3   | 8.16  |
| Q91Y72   | E3 ubiquitin-protein ligase RNF185 OS=Mus musculus GN=Rnf185 PE=2 SV=1 - [RNF185_MOUSE]                                          | 3.65  | 2  | 1  | 1   | 2   | 0.607 | 1.042 | 0.890 | 0.968 | 4.35    | 3.65  | 1   | 2   | 192  | 20.5  | 6.52  |
| Q91XQ0-2 | Isoform 2 of Dynein heavy chain 8, axonemal OS=Mus musculus GN=Dnahc8 -                                                          | 2.38  | 3  | 7  | 8   | 9   | 0.827 | 0.530 | 0.936 | 0.968 | 21.03   | 2.38  | 8   | 9   | 4202 | 479.8 | 6.13  |
| Q9EPL8   | Importin-7 OS=Mus musculus GN=Ipo7 PE=1 SV=2 - [IPO7_MOUSE]                                                                      | 22.25 | 1  | 19 | 19  | 72  | 0.600 | 1.113 | 0.809 | 0.968 | 215.41  | 22.25 | 35  | 72  | 1038 | 119.4 | 4.82  |
| G3UW89   | Zinc finger protein 423 OS=Mus musculus GN=Zfp423 PE=4 SV=1 - [G3UW89_MOUSE]                                                     | 0.86  | 3  | 1  | 1   | 1   | 0.701 | 1.229 | 0.741 | 0.968 | 2.05    | 0.86  | 1   | 1   | 1167 | 131.5 | 7.42  |
| E9Q9Q2   | Protein R3hdm1 OS=Mus musculus GN=R3hdm1 PE=2 SV=1 - [E9Q9Q2_MOUSE]                                                              | 11.37 | 1  | 7  | 9   | 21  | 1.073 | 1.054 | 0.981 | 0.968 | 65.82   | 11.37 | 13  | 21  | 1135 | 124.3 | 8.70  |
| G3UYK7   | Protein Gm20537 (Fragment) OS=Mus musculus GN=Gm20537 PE=4 SV=1 -                                                                | 24.74 | 2  | 2  | 2   | 11  | 1.317 | 1.054 | 1.093 | 0.968 | 22.43   | 24.74 | 3   | 11  | 97   | 10.3  | 10.05 |
| E9PUM4   | Talin-2 OS=Mus musculus GN=Tin2 PE=4 SV=1 - [E9PUM4_MOUSE]                                                                       | 52.83 | 2  | 88 | 109 | 513 | 0.674 | 1.005 | 0.930 | 0.968 | 1587.14 | 52.83 | 189 | 513 | 2542 | 271.5 | 5.55  |
| Q9D074   | E3 ubiquitin-protein ligase MGRN1 OS=Mus musculus GN=Mgrn1 PE=1 SV=2 - [MGRN1_MOUSE]                                             | 16.92 | 5  | 5  | 7   | 17  | 1.000 | 1.006 | 0.859 | 0.968 | 49.34   | 16.92 | 11  | 17  | 532  | 58.4  | 4.88  |
| B1AZI6   | THO complex subunit 2 OS=Mus musculus GN=Thoc2 PE=2 SV=1 - [THOC2_MOUSE]                                                         | 6.90  | 3  | 8  | 10  | 17  | 1.950 | 0.925 | 1.098 | 0.968 | 31.00   | 6.90  | 14  | 17  | 1594 | 182.7 | 8.44  |
| Q3UMT1   | Protein phosphatase 1 regulatory subunit 12C OS=Mus musculus GN=Ppp1r12c PE=1 SV=1 [PPI2C_MOUSE]                                 | 34.65 | 2  | 19 | 19  | 81  | 1.201 | 0.711 | 1.177 | 0.968 | 241.26  | 34.65 | 35  | 81  | 782  | 84.6  | 6.00  |
| Q8VEJ4   | Notchless protein homolog 1 OS=Mus musculus GN=Nle1 PE=2 SV=4 - [NLE1_MOUSE]                                                     | 12.37 | 1  | 4  | 4   | 7   | 2.018 | 1.024 | 0.986 | 0.968 | 17.56   | 12.37 | 5   | 7   | 485  | 53.1  | 7.17  |
| O35594   | Intraflagellar transport protein 81 homolog OS=Mus musculus GN=If81 PE=2 SV=4 - [IFT81_MOUSE]                                    | 15.24 | 3  | 9  | 10  | 25  | 1.062 | 0.971 | 0.914 | 0.968 | 76.41   | 15.24 | 16  | 25  | 676  | 79.2  | 8.75  |
| Q9QXG4   | Acetyl-coenzyme A synthetase, cytoplasmic OS=Mus musculus GN=Acsc2 PE=1 SV=2 - [ACSA_MOUSE]                                      | 19.26 | 5  | 12 | 12  | 48  | 0.919 | 0.558 | 0.813 | 0.968 | 121.68  | 19.26 | 21  | 48  | 701  | 78.8  | 6.64  |
| Q8BG78   | Phytanoyl-CoA hydroxylase interacting protein-like OS=Mus musculus GN=Phyhipl PE=2 SV=1 - [PHIPL_MOUSE]                          | 49.07 | 5  | 17 | 19  | 215 | 0.954 | 0.875 | 0.892 | 0.968 | 569.64  | 49.07 | 36  | 215 | 375  | 42.3  | 6.35  |
| Q9JM13   | Rab5 GDP/GTP exchange factor OS=Mus musculus GN=Rabgef1 PE=1 SV=1 - [RABXS_MOUSE]                                                | 38.49 | 3  | 18 | 18  | 49  | 1.032 | 1.045 | 1.000 | 0.968 | 135.11  | 38.49 | 29  | 49  | 491  | 56.8  | 6.79  |
| O35852   | Preprodynorphin (Fragment) OS=Mus musculus GN=Pdyn PE=2 SV=1 - [O35852_MOUSE]                                                    | 22.58 | 2  | 4  | 4   | 11  | 1.246 | 0.780 | 1.154 | 0.968 | 37.20   | 22.58 | 7   | 11  | 248  | 28.0  | 5.63  |
| Q45VK7   | Cytoplasmic dynein 2 heavy chain 1 OS=Mus musculus GN=Dync2h1 PE=1 SV=1 -                                                        | 5.16  | 5  | 20 | 20  | 38  | 0.713 | 1.000 | 0.777 | 0.968 | 86.25   | 5.16  | 29  | 38  | 4306 | 492.0 | 6.60  |
| P40936   | Indolethylamine N-methyltransferase OS=Mus musculus GN=Inmt PE=1 SV=1 - [INMT_MOUSE]                                             | 14.39 | 1  | 3  | 3   | 6   | 3.539 | 1.139 | 1.128 | 0.968 | 16.21   | 14.39 | 5   | 6   | 264  | 29.4  | 6.39  |
| E9PXE2   | Guanine nucleotide exchange factor DBS OS=Mus musculus GN=Mcf2l PE=2 SV=1 -                                                      | 19.23 | 16 | 16 | 17  | 53  | 1.002 | 0.910 | 0.932 | 0.968 | 157.06  | 19.23 | 28  | 53  | 1175 | 132.3 | 6.27  |
| Q99LK1   | Monacylglycerol lipase ABHD12 OS=Mus musculus GN=Abhd12 PE=1 SV=2 -                                                              | 43.47 | 4  | 14 | 14  | 64  | 0.650 | 0.809 | 0.942 | 0.968 | 192.52  | 43.47 | 27  | 64  | 398  | 45.2  | 8.72  |
| E9Q9J4   | Inositol hexakisphosphate and diphosphoinositol-pentakisphosphate kinase 2 OS=Mus musculus GN=Ppig5k2 PE=2 SV=1 - [E9Q9J4_MOUSE] | 21.01 | 5  | 14 | 20  | 53  | 1.059 | 0.443 | 0.834 | 0.968 | 152.74  | 21.01 | 29  | 53  | 1242 | 140.3 | 8.22  |
| Q8VI33   | Transcription initiation factor TFIID subunit 9 OS=Mus musculus GN=Taf9 PE=2 SV=1 - [TAF9_MOUSE]                                 | 18.94 | 2  | 2  | 4   | 9   | 1.048 | 0.836 | 1.010 | 0.969 | 20.86   | 18.94 | 7   | 9   | 264  | 29.0  | 7.91  |
| O35075   | Down syndrome critical region protein 3 homolog OS=Mus musculus GN=Dscr3 PE=2 SV=1 - [DSCR3_MOUSE]                               | 16.16 | 1  | 3  | 3   | 5   | 2.295 | 1.139 | 0.851 | 0.969 | 12.98   | 16.16 | 4   | 5   | 297  | 32.9  | 7.68  |

|          |                                                                                                                          |       |    |    |    |     |       |       |       |       |        |       |    |     |      |       |       |
|----------|--------------------------------------------------------------------------------------------------------------------------|-------|----|----|----|-----|-------|-------|-------|-------|--------|-------|----|-----|------|-------|-------|
| Q9CZM4-3 | Isoform 3 of Protein shisa-9 OS=Mus musculus GN=Shisa9 - [SHSA9_MOUSE]                                                   | 19.86 | 4  | 8  | 8  | 23  | 0.770 | 0.937 | 1.040 | 0.969 | 63.07  | 19.86 | 16 | 23  | 423  | 46.7  | 8.62  |
| Q9DCD2   | Pre-mRNA-splicing factor SYF1 OS=Mus musculus GN=Xab2 PE=2 SV=1 - [SYF1_MOUSE]                                           | 10.29 | 3  | 9  | 9  | 19  | 0.895 | 0.910 | 0.911 | 0.969 | 48.62  | 10.29 | 13 | 19  | 855  | 99.9  | 6.23  |
| Q3TQ29   | Pumilio homolog 2 OS=Mus musculus GN=Pum2 PE=2 SV=1 - [Q3TQ29_MOUSE]                                                     | 11.02 | 10 | 6  | 10 | 36  | 1.039 | 1.043 | 0.891 | 0.969 | 117.38 | 11.02 | 16 | 36  | 980  | 105.6 | 6.86  |
| G3X915   | LysM and putative peptidoglycan-binding domain-containing protein 2 OS=Mus musculus GN=Lysmd2 PE=4 SV=1 - [L3X915_MOUSE] | 35.35 | 3  | 5  | 7  | 28  | 1.354 | 1.080 | 1.520 | 0.969 | 71.14  | 35.35 | 13 | 28  | 215  | 23.6  | 5.52  |
| Q3UP87   | Neutrophil elastase OS=Mus musculus GN=Elane PE=2 SV=1 - [ELNE_MOUSE]                                                    | 10.19 | 1  | 1  | 1  | 1   | 7.921 | 1.187 | 0.983 | 0.969 | 2.44   | 10.19 | 1  | 1   | 265  | 28.6  | 10.01 |
| A2AI21   | Glutamate receptor ionotropic, NMDA 1 OS=Mus musculus GN=Grin1 PE=2 SV=1 - [A2AI21_MOUSE]                                | 16.37 | 10 | 17 | 17 | 56  | 0.663 | 1.952 | 1.297 | 0.969 | 158.13 | 16.37 | 29 | 56  | 959  | 107.9 | 8.97  |
| Q6P3A8   | 2-oxoisovalerate dehydrogenase subunit beta, mitochondrial OS=Mus musculus GN=Bckdhb PE=2 SV=2 - [Q6P3A8_MOUSE]          | 36.67 | 2  | 9  | 9  | 22  | 0.655 | 0.687 | 0.700 | 0.969 | 70.48  | 36.67 | 15 | 22  | 390  | 42.9  | 6.70  |
| Q8C5P7-2 | Isoform 2 of Testis development-related protein OS=Mus musculus GN=Tdrp -                                                | 8.97  | 1  | 1  | 1  | 2   | 1.707 | 1.470 | 1.263 | 0.969 | 5.69   | 8.97  | 2  | 2   | 156  | 16.7  | 9.31  |
| Q8BYN2   | DNA segment, Chr 2, ERATO Doi 435, expressed, isoform CRA_e OS=Mus musculus GN=Tubgcp4 PE=2 SV=1 - [Q8BYN2_MOUSE]        | 9.16  | 3  | 3  | 5  | 14  | 2.143 | 2.847 | 1.059 | 0.969 | 38.40  | 9.16  | 7  | 14  | 666  | 76.0  | 6.65  |
| Q4VA55   | FWP domain-containing protein MUM11 OS=Mus musculus GN=Mum11 PE=1 SV=2 - [MUM11_MOUSE]                                   | 4.26  | 3  | 2  | 2  | 2   | 1.012 | 1.228 | 2.047 | 0.969 | 0.00   | 4.26  | 2  | 2   | 681  | 76.9  | 4.93  |
| P58059   | 28S ribosomal protein S21, mitochondrial OS=Mus musculus GN=Mips21 PE=2 SV=1 - [RT21_MOUSE]                              | 48.28 | 3  | 4  | 4  | 8   | 0.589 | 0.587 | 0.894 | 0.970 | 23.80  | 48.28 | 6  | 8   | 87   | 10.6  | 10.32 |
| Q9Z1B8   | PHD finger protein 1 OS=Mus musculus GN=Phf1 PE=1 SV=2 - [PHF1_MOUSE]                                                    | 9.12  | 1  | 2  | 2  | 5   | 0.580 | 0.669 | 0.821 | 0.970 | 7.38   | 9.12  | 3  | 5   | 559  | 61.1  | 8.84  |
| E9Q3H6   | Protein Coq10a OS=Mus musculus GN=Coq10a PE=2 SV=1 - [E9Q3H6_MOUSE]                                                      | 22.39 | 4  | 6  | 6  | 16  | 0.551 | 0.906 | 0.871 | 0.970 | 40.30  | 22.39 | 10 | 16  | 259  | 28.9  | 9.82  |
| Q99N84   | 28S ribosomal protein S18b, mitochondrial OS=Mus musculus GN=Mips18b PE=2 SV=1 - [RT18B_MOUSE]                           | 20.08 | 5  | 4  | 4  | 13  | 1.189 | 0.778 | 0.732 | 0.970 | 43.10  | 20.08 | 6  | 13  | 254  | 28.7  | 8.35  |
| P55772   | Ectonucleoside triphosphate diphosphohydrolase 1 OS=Mus musculus GN=Entpd1 PE=2 SV=1 - [ENTPD1_MOUSE]                    | 22.55 | 5  | 8  | 8  | 24  | 1.176 | 1.453 | 1.072 | 0.970 | 64.75  | 22.55 | 14 | 24  | 510  | 57.2  | 5.86  |
| Q80XJ3   | Tetratricopeptide repeat protein 28 OS=Mus musculus GN=Ttc28 PE=2 SV=3 - [TTC28_MOUSE]                                   | 2.49  | 1  | 5  | 5  | 12  | 1.576 | 1.075 | 1.164 | 0.970 | 29.61  | 2.49  | 8  | 12  | 2450 | 267.3 | 7.15  |
| P58686   | UPF0184 protein C9orf16 homolog OS=Mus musculus PE=2 SV=1 - [C1016_MOUSE]                                                | 30.12 | 1  | 2  | 2  | 5   | 2.184 | 1.486 | 0.901 | 0.970 | 13.71  | 30.12 | 2  | 5   | 83   | 9.0   | 4.26  |
| Q9CYH6   | Ribosome biogenesis regulatory protein homolog OS=Mus musculus GN=Rrs1 PE=2 SV=1 - [RRS1_MOUSE]                          | 18.08 | 1  | 6  | 7  | 11  | 0.907 | 0.974 | 0.940 | 0.970 | 23.62  | 18.08 | 9  | 11  | 365  | 41.5  | 10.77 |
| P61166   | Transmembrane protein 258 OS=Mus musculus GN=Tmem258 PE=2 SV=1 - [TM258_MOUSE]                                           | 10.13 | 1  | 1  | 1  | 2   | 1.040 | 1.060 | 0.931 | 0.970 | 4.51   | 10.13 | 2  | 2   | 79   | 9.1   | 5.83  |
| Q01149   | Collagen alpha-2(I) chain OS=Mus musculus GN=Col1a2 PE=2 SV=2 - [CO1A2_MOUSE]                                            | 27.26 | 2  | 20 | 20 | 75  | 0.995 | 4.268 | 1.008 | 0.970 | 222.82 | 27.26 | 29 | 75  | 1372 | 129.5 | 9.19  |
| P50295   | Arylamine N-acetyltransferase 2 OS=Mus musculus GN=Nat2 PE=1 SV=1 -                                                      | 16.55 | 3  | 4  | 4  | 8   | 1.894 | 1.338 | 0.902 | 0.970 | 15.85  | 16.55 | 5  | 8   | 290  | 33.7  | 5.88  |
| Q8BXC6   | COMM domain-containing protein 2 OS=Mus musculus GN=Comm2 PE=1 SV=1 -                                                    | 13.07 | 2  | 3  | 3  | 11  | 0.880 | 1.556 | 0.848 | 0.970 | 25.28  | 13.07 | 5  | 11  | 199  | 22.8  | 6.62  |
| Q8BL65-3 | Isoform 3 of Actin-binding LIM protein 2 OS=Mus musculus GN=Ablim2 - [ABLM2_MOUSE]                                       | 49.01 | 7  | 1  | 23 | 165 | 4.585 | 1.409 | 1.403 | 0.970 | 530.91 | 49.01 | 42 | 165 | 606  | 67.5  | 8.13  |
| Q3TCK3-2 | Isoform 2 of UPF0469 protein KIAA0907 OS=Mus musculus GN=Kiaa0907 - [K0907_MOUSE]                                        | 7.39  | 2  | 2  | 2  | 4   | 1.546 | 1.531 | 1.581 | 0.970 | 16.46  | 7.39  | 2  | 4   | 487  | 51.2  | 9.23  |
| Q9D023   | Mitochondrial pyruvate carrier 2 OS=Mus musculus GN=Mpc2 PE=1 SV=1 - [MPC2_MOUSE]                                        | 21.26 | 3  | 3  | 4  | 25  | 0.398 | 0.662 | 0.849 | 0.970 | 46.86  | 21.26 | 7  | 25  | 127  | 14.3  | 10.61 |

|          |                                                                                                                                            |       |   |    |    |     |        |       |       |       |        |       |    |     |      |       |      |
|----------|--------------------------------------------------------------------------------------------------------------------------------------------|-------|---|----|----|-----|--------|-------|-------|-------|--------|-------|----|-----|------|-------|------|
| J3QP81   | CLIP-associating protein 1<br>OS=Mus musculus<br>GN=Clasp1 PE=4 SV=1 -<br>[J3QP81_MOUSE]                                                   | 41.74 | 3 | 1  | 52 | 213 | 0.379  | 0.364 | 0.893 | 0.970 | 641.97 | 41.74 | 92 | 213 | 1459 | 160.8 | 8.68 |
| Q9JK83   | Partitioning defective 6<br>homolog beta OS=Mus<br>musculus GN=Pard6b<br>PE=1 SV=2 -                                                       | 9.97  | 2 | 3  | 3  | 5   | 1.335  | 1.197 | 1.256 | 0.970 | 12.10  | 9.97  | 5  | 5   | 371  | 41.0  | 5.59 |
| Q9CZU3   | Superkiller viralicidic<br>activity 2-like 2 OS=Mus<br>musculus GN=Skiv2l2<br>PE=2 SV=1 -                                                  | 10.58 | 1 | 10 | 10 | 20  | 1.130  | 1.076 | 0.962 | 0.970 | 55.90  | 10.58 | 17 | 20  | 1040 | 117.6 | 6.40 |
| Q8VC85   | U6 snRNA-associated Sm-<br>like protein Lsm1 OS=Mus<br>musculus GN=Lsm1 PE=2<br>SV=1 - [LSM1_MOUSE]                                        | 24.81 | 1 | 2  | 2  | 4   | 2.817  | 1.321 | 1.053 | 0.970 | 9.25   | 24.81 | 3  | 4   | 133  | 15.2  | 5.38 |
| Q8K209   | G-protein coupled receptor<br>56 OS=Mus musculus<br>GN=Gpr56 PE=1 SV=1 -<br>[GPR56_MOUSE]                                                  | 14.99 | 1 | 10 | 10 | 44  | 1.242  | 0.737 | 0.650 | 0.970 | 122.71 | 14.99 | 17 | 44  | 687  | 77.2  | 8.59 |
| Q62283   | Tetraspanin-7 OS=Mus<br>musculus GN=Tspan7<br>PE=2 SV=2 -<br>[TSN7_MOUSE]                                                                  | 14.46 | 2 | 3  | 3  | 9   | 0.674  | 1.010 | 1.250 | 0.970 | 18.99  | 14.46 | 3  | 9   | 249  | 27.5  | 7.20 |
| L7N1Y6   | Protein Olfir889 OS=Mus<br>musculus GN=Olfir889<br>PE=3 SV=1 -<br>[L7N1Y6_MOUSE]                                                           | 3.18  | 1 | 1  | 1  | 1   | 20.429 | 1.882 | 1.875 | 0.970 | 2.31   | 3.18  | 1  | 1   | 314  | 35.1  | 7.81 |
| Q9QYC0-2 | Isoform 2 of Alpha-<br>adducin OS=Mus musculus<br>GN=Add1 -<br>[ADDA_MOUSE]                                                                | 56.33 | 6 | 1  | 26 | 267 | 0.878  | 0.794 | 1.005 | 0.970 | 721.91 | 56.33 | 46 | 267 | 632  | 69.8  | 6.51 |
| Q8BFV3   | Dual specificity protein<br>phosphatase 4 OS=Mus<br>musculus GN=Dusp4 PE=2<br>SV=1 - [DUS4_MOUSE]                                          | 3.27  | 1 | 1  | 1  | 1   | 2.081  | 1.523 | 1.455 | 0.970 | 3.04   | 3.27  | 1  | 1   | 398  | 43.3  | 7.55 |
| Q61830   | Macrophage mannose<br>receptor 1 OS=Mus<br>musculus GN=Mrc1 PE=1<br>SV=2 - [MRC1_MOUSE]                                                    | 3.98  | 1 | 5  | 5  | 11  | 0.819  | 1.379 | 0.951 | 0.970 | 31.53  | 3.98  | 9  | 11  | 1456 | 164.9 | 6.83 |
| Q9J190   | E3 ubiquitin-protein ligase<br>RNF14 OS=Mus musculus<br>GN=Rnf14 PE=2 SV=2 -<br>[RNF14_MOUSE]                                              | 15.05 | 3 | 7  | 7  | 25  | 0.984  | 1.024 | 0.999 | 0.971 | 71.71  | 15.05 | 12 | 25  | 485  | 54.9  | 4.70 |
| P39447   | Tight junction protein ZO-<br>1 OS=Mus musculus<br>GN=Tjp1 PE=1 SV=2 -<br>[ZO1_MOUSE]                                                      | 31.75 | 1 | 2  | 43 | 186 | 2.598  | 1.638 | 1.146 | 0.971 | 532.23 | 31.75 | 73 | 186 | 1745 | 194.6 | 6.64 |
| Q923U0   | TOM1-like protein 1<br>OS=Mus musculus<br>GN=Tom1l1 PE=1 SV=1 -<br>[TM1L1_MOUSE]                                                           | 16.88 | 5 | 5  | 6  | 19  | 1.121  | 1.113 | 0.892 | 0.971 | 52.14  | 16.88 | 11 | 19  | 474  | 52.7  | 5.36 |
| Q8CIH9   | Amidophosphoribosyltransf-<br>erase OS=Mus musculus<br>GN=Ppat PE=2 SV=1 -<br>[Q8CIH9_MOUSE]                                               | 26.69 | 1 | 13 | 13 | 26  | 1.290  | 1.113 | 0.880 | 0.971 | 58.99  | 26.69 | 21 | 26  | 517  | 57.4  | 6.96 |
| E9QP59   | Inner nuclear membrane<br>protein Man1 OS=Mus<br>musculus GN=Lemd3<br>PE=2 SV=1 -<br>[E9QP59_MOUSE]                                        | 24.84 | 4 | 16 | 16 | 32  | 0.787  | 0.765 | 1.024 | 0.971 | 87.75  | 24.84 | 25 | 32  | 918  | 100.1 | 7.55 |
| Q91YNS-2 | Isoform AGX1 of UDP-N-<br>acetylhexosamine<br>pyrophosphorylase<br>OS=Mus musculus<br>GN=Uap1 -<br>[UAP1_MOUSE]                            | 23.56 | 4 | 10 | 10 | 27  | 0.940  | 0.978 | 1.027 | 0.971 | 81.66  | 23.56 | 16 | 27  | 505  | 56.9  | 6.54 |
| P59913   | Protein-L-isoaspartate O-<br>methyltransferase domain-<br>containing protein 1<br>OS=Mus musculus<br>GN=Pcmd1 PE=2 SV=1 -<br>[PCMD1_MOUSE] | 10.64 | 1 | 4  | 5  | 13  | 0.926  | 0.663 | 1.075 | 0.971 | 26.70  | 10.64 | 9  | 13  | 357  | 40.7  | 5.66 |
| Q9DCF9-2 | Isoform 2 of Translocon-<br>associated protein subunit<br>gamma OS=Mus musculus<br>GN=Ser3 - [SSRG_MOUSE]                                  | 12.29 | 2 | 2  | 2  | 3   | 1.091  | 0.813 | 0.800 | 0.971 | 5.41   | 12.29 | 2  | 3   | 179  | 20.7  | 9.35 |
| Q8CFC7-2 | Isoform 2 of CLK4-<br>associating serine/arginine<br>rich protein OS=Mus<br>musculus GN=Clasrp -<br>[CLASR_MOUSE]                          | 1.36  | 3 | 1  | 1  | 1   | 0.410  | 0.966 | 1.032 | 0.971 | 0.00   | 1.36  | 1  | 1   | 588  | 65.9  | 9.98 |
| P63080   | Gamma-aminobutyric acid<br>receptor subunit beta-3<br>OS=Mus musculus<br>GN=Gabbr3 PE=2 SV=1 -<br>[GBRB3_MOUSE]                            | 14.16 | 3 | 5  | 7  | 34  | 0.690  | 1.124 | 1.124 | 0.971 | 113.65 | 14.16 | 12 | 34  | 473  | 54.1  | 9.10 |
| E9Q1P0   | Protein Olfir739 OS=Mus<br>musculus GN=Olfir739<br>PE=3 SV=1 -<br>[E9Q1P0_MOUSE]                                                           | 6.15  | 2 | 1  | 1  | 1   | 1.494  | 1.007 | 0.868 | 0.971 | 0.00   | 6.15  | 1  | 1   | 309  | 34.7  | 8.22 |
| Q5NCK5-2 | Isoform 2 of Neuralized-<br>like protein 4 OS=Mus<br>musculus GN=Neur4 -<br>[NEUL4_MOUSE]                                                  | 6.81  | 7 | 7  | 8  | 11  | 1.660  | 1.139 | 0.860 | 0.971 | 31.49  | 6.81  | 11 | 11  | 1541 | 165.1 | 5.96 |
| E9QKZ2   | Importin-9 OS=Mus<br>musculus GN=Ipo9 PE=2<br>SV=1 - [E9QKZ2_MOUSE]                                                                        | 17.60 | 6 | 16 | 16 | 43  | 0.689  | 1.061 | 0.795 | 0.971 | 127.39 | 17.60 | 28 | 43  | 1040 | 115.9 | 4.82 |
| E9Q1P8   | Interferon regulatory<br>factor 2-binding protein 2<br>OS=Mus musculus<br>GN=Irf2bp2 PE=1 SV=1 -<br>[I2BP2_MOUSE]                          | 33.16 | 1 | 11 | 12 | 33  | 1.457  | 0.959 | 1.164 | 0.971 | 120.41 | 33.16 | 20 | 33  | 570  | 59.3  | 8.69 |

|          |                                                                                                                     |       |   |    |    |     |       |       |       |       |        |       |    |     |      |       |       |
|----------|---------------------------------------------------------------------------------------------------------------------|-------|---|----|----|-----|-------|-------|-------|-------|--------|-------|----|-----|------|-------|-------|
| P97450   | ATP synthase-coupling factor 6, mitochondrial<br>OS=Mus musculus<br>GN=Atp5j PE=1 SV=1 -<br>[ATP5J_MOUSE]           | 46.30 | 2 | 6  | 6  | 83  | 1.930 | 1.002 | 1.347 | 0.971 | 219.90 | 46.30 | 12 | 83  | 108  | 12.5  | 9.36  |
| Q6PGE7   | Sodium-dependent proline transporter OS=Mus musculus GN=Slc6a7 PE=2 SV=1 -<br>[SC6A7_MOUSE]                         | 7.85  | 1 | 3  | 3  | 22  | 0.563 | 1.385 | 0.986 | 0.972 | 60.43  | 7.85  | 6  | 22  | 637  | 71.0  | 6.61  |
| Q8VEG4   | Exonuclease 3'-5' domain-containing protein 2<br>OS=Mus musculus<br>GN=Exd2 PE=2 SV=1 -<br>[EXD2_MOUSE]             | 14.52 | 2 | 6  | 6  | 19  | 0.664 | 0.722 | 1.037 | 0.972 | 50.79  | 14.52 | 9  | 19  | 496  | 56.7  | 8.16  |
| Q8CBC4   | Consortin OS=Mus musculus GN=Cnst PE=1 SV=1 -<br>[CNST_MOUSE]                                                       | 24.75 | 3 | 10 | 10 | 24  | 1.327 | 0.881 | 1.080 | 0.972 | 76.38  | 24.75 | 14 | 24  | 711  | 76.8  | 4.59  |
| Q8JZ7    | Mitochondrial Rho GTPase 2<br>OS=Mus musculus<br>GN=Rho2 PE=2 SV=1 -<br>[MIRO2_MOUSE]                               | 21.94 | 4 | 9  | 11 | 40  | 1.007 | 0.930 | 0.973 | 0.972 | 121.14 | 21.94 | 20 | 40  | 620  | 69.0  | 6.00  |
| Q5DT9    | BTB/POZ domain-containing protein KCTD16<br>OS=Mus musculus<br>GN=Kctd16 PE=1 SV=2 -<br>[KCD16_MOUSE]               | 28.57 | 1 | 12 | 14 | 77  | 0.575 | 1.254 | 1.270 | 0.972 | 224.94 | 28.57 | 26 | 77  | 427  | 48.9  | 8.19  |
| Q80SYS   | Pre-mRNA-splicing factor 38B<br>OS=Mus musculus<br>GN=Prpf38b PE=1 SV=1 -<br>[PR38B_MOUSE]                          | 6.09  | 1 | 3  | 3  | 6   | 0.540 | 0.581 | 0.871 | 0.972 | 12.17  | 6.09  | 6  | 6   | 542  | 63.7  | 10.54 |
| P62812   | Gamma-aminobutyric acid receptor subunit alpha-1<br>OS=Mus musculus<br>GN=Gabra1 PE=1 SV=1 -<br>[GBRA1_MOUSE]       | 31.87 | 2 | 12 | 18 | 104 | 0.484 | 0.687 | 1.115 | 0.972 | 277.74 | 31.87 | 34 | 104 | 455  | 51.7  | 9.31  |
| Q8VEB3   | UNC119-binding protein C5orf30 homolog<br>OS=Mus musculus GN=D1Ert6622e PE=2 SV=1 -<br>[CE030_MOUSE]                | 9.66  | 2 | 2  | 2  | 3   | 1.408 | 1.000 | 0.905 | 0.972 | 7.07   | 9.66  | 3  | 3   | 207  | 23.1  | 9.45  |
| Q8R332-4 | Isoform 4 of Nucleoporin p58/p45<br>OS=Mus musculus GN=Nup1 -<br>[NUPL1_MOUSE]                                      | 14.66 | 4 | 7  | 7  | 15  | 1.193 | 1.024 | 0.993 | 0.972 | 36.05  | 14.66 | 11 | 15  | 532  | 54.0  | 8.31  |
| E0CYX7   | FXD domain-containing ion transport regulator 5 (Fragment)<br>OS=Mus musculus GN=Fxd5 PE=2 SV=1 -<br>[E0CYX7_MOUSE] | 14.41 | 5 | 1  | 1  | 2   | 0.998 | 2.207 | 0.998 | 0.972 | 8.57   | 14.41 | 2  | 2   | 111  | 11.7  | 8.19  |
| Q80ZES   | Membrane progesterin receptor beta<br>OS=Mus musculus GN=Pagr8 PE=2 SV=2 -<br>[MPRB_MOUSE]                          | 5.65  | 1 | 2  | 2  | 3   | 1.181 | 1.297 | 1.645 | 0.972 | 4.17   | 5.65  | 3  | 3   | 354  | 40.4  | 8.15  |
| Q8R417   | Neurophilin and tolloid-like protein 1<br>OS=Mus musculus GN=Neto1 PE=1 SV=2 -<br>[NETO1_MOUSE]                     | 16.70 | 1 | 6  | 6  | 12  | 1.125 | 1.296 | 1.453 | 0.972 | 43.42  | 16.70 | 9  | 12  | 533  | 60.2  | 6.99  |
| Q9DC53   | Copine-8<br>OS=Mus musculus GN=Cpne8 PE=2 SV=2 -<br>[CPNE8_MOUSE]                                                   | 23.94 | 3 | 3  | 12 | 89  | 1.792 | 1.305 | 1.048 | 0.972 | 245.23 | 23.94 | 21 | 89  | 564  | 63.1  | 5.96  |
| F7CTH4   | Protein Zfp811<br>OS=Mus musculus GN=Zfp811 PE=4 SV=1 -<br>[F7CTH4_MOUSE]                                           | 7.80  | 1 | 3  | 3  | 3   | 1.238 | 1.145 | 1.253 | 0.972 | 2.69   | 7.80  | 3  | 3   | 551  | 62.8  | 9.31  |
| Q78ZM0   | Sorting nexin 3<br>OS=Mus musculus GN=Snx3 PE=2 SV=1 -<br>[Q78ZM0_MOUSE]                                            | 55.56 | 4 | 8  | 10 | 43  | 1.204 | 0.916 | 0.985 | 0.972 | 109.78 | 55.56 | 18 | 43  | 162  | 18.8  | 8.66  |
| A2AKI5   | Integrin alpha-V light chain<br>OS=Mus musculus GN=Itgav PE=2 SV=1 -<br>[A2AKI5_MOUSE]                              | 36.41 | 4 | 33 | 33 | 128 | 0.897 | 1.614 | 0.973 | 0.972 | 353.18 | 36.41 | 61 | 128 | 1008 | 111.4 | 5.67  |
| Q8BHNS   | RNA-binding protein 45<br>OS=Mus musculus GN=Rbm45 PE=2 SV=1 -<br>[RBM45_MOUSE]                                     | 3.36  | 1 | 2  | 2  | 2   | 1.334 | 0.924 | 0.971 | 0.972 | 2.46   | 3.36  | 2  | 2   | 476  | 53.3  | 7.69  |
| Q8R0X7   | Sphingosine-1-phosphate lyase 1<br>OS=Mus musculus GN=Sgpl1 PE=2 SV=1 -<br>[SGPL1_MOUSE]                            | 16.37 | 5 | 9  | 10 | 17  | 0.704 | 0.852 | 0.920 | 0.972 | 40.24  | 16.37 | 14 | 17  | 568  | 63.6  | 9.10  |
| Q8C996   | Transmembrane protein 163<br>OS=Mus musculus GN=Tmem163 PE=1 SV=1 -<br>[TM163_MOUSE]                                | 20.14 | 1 | 4  | 4  | 54  | 1.190 | 1.141 | 0.959 | 0.972 | 193.00 | 20.14 | 6  | 54  | 288  | 31.2  | 7.93  |
| F6ZG17   | Molybdopterin synthase catalytic subunit<br>OS=Mus musculus GN=Mocs2 PE=4 SV=1 -<br>[F6ZG17_MOUSE]                  | 45.45 | 2 | 4  | 4  | 13  | 2.120 | 0.893 | 1.040 | 0.972 | 27.36  | 45.45 | 8  | 13  | 88   | 9.7   | 4.61  |
| Q9JHG2   | Calcipressin-2<br>OS=Mus musculus GN=Rcan2 PE=2 SV=1 -<br>[RCAN2_MOUSE]                                             | 13.20 | 2 | 3  | 3  | 9   | 1.899 | 0.859 | 0.987 | 0.972 | 20.37  | 13.20 | 5  | 9   | 197  | 22.0  | 6.68  |
| D3Z5N5   | 1-phosphatidylinositol 3-phosphate 5-kinase<br>OS=Mus musculus GN=Plkfyve PE=2 SV=2 -<br>[D3Z5N5_MOUSE]             | 15.01 | 4 | 25 | 25 | 51  | 0.897 | 1.122 | 1.098 | 0.972 | 139.00 | 15.01 | 36 | 51  | 2052 | 231.9 | 6.64  |
| A8C756   | Thyroid adenoma-associated protein homolog<br>OS=Mus musculus GN=Thada PE=2 SV=1 -<br>[THADA_MOUSE]                 | 1.34  | 3 | 2  | 2  | 3   | 0.839 | 0.834 | 0.956 | 0.972 | 5.67   | 1.34  | 3  | 3   | 1938 | 217.1 | 6.25  |
| Q8BMF8   | Gliomedin<br>OS=Mus musculus GN=Gldn PE=1 SV=1 -<br>[GLDN_MOUSE]                                                    | 2.55  | 1 | 1  | 1  | 1   | 7.704 | 1.324 | 1.457 | 0.973 | 2.97   | 2.55  | 1  | 1   | 549  | 59.1  | 8.51  |



|          |                                                                                                                            |       |    |    |    |     |       |       |       |       |        |       |    |     |      |       |      |
|----------|----------------------------------------------------------------------------------------------------------------------------|-------|----|----|----|-----|-------|-------|-------|-------|--------|-------|----|-----|------|-------|------|
| Q8K013   | GTP-binding protein 10 OS=Mus musculus GN=Gtbp10 PE=2 SV=1 - [GTPBA_MOUSE]                                                 | 14.21 | 10 | 4  | 6  | 14  | 0.951 | 1.013 | 1.023 | 0.973 | 28.42  | 14.21 | 10 | 14  | 366  | 40.1  | 9.14 |
| P51174   | Long-chain specific acyl-CoA dehydrogenase, mitochondrial OS=Mus musculus GN=Acadl PE=2 SV=2 - [ACADL_MOUSE]               | 46.98 | 1  | 20 | 20 | 145 | 1.889 | 0.989 | 0.764 | 0.973 | 452.41 | 46.98 | 38 | 145 | 430  | 47.9  | 8.31 |
| E9QAQ5   | Glycogen synthase kinase-3 beta OS=Mus musculus GN=Gsk3b PE=2 SV=1 - [E9QAQ5_MOUSE]                                        | 64.43 | 2  | 14 | 21 | 169 | 0.614 | 0.837 | 0.969 | 0.973 | 482.36 | 64.43 | 39 | 169 | 433  | 48.0  | 8.78 |
| Q03173-4 | isoform 3 of Protein enabled homolog OS=Mus musculus GN=Enah - [ENAH_MOUSE]                                                | 31.67 | 8  | 1  | 19 | 122 | 2.848 | 1.846 | 0.684 | 0.973 | 296.94 | 31.67 | 29 | 122 | 783  | 83.7  | 7.53 |
| Q9CTYS   | Calcium uptake protein 3, mitochondrial OS=Mus musculus GN=MicU3 PE=2 SV=2 - [MICU3_MOUSE]                                 | 34.61 | 2  | 15 | 15 | 56  | 0.599 | 1.029 | 1.027 | 0.973 | 196.83 | 34.61 | 30 | 56  | 523  | 59.8  | 7.15 |
| Q9JLR1   | Protein transport protein Sec61 subunit alpha isoform 2 OS=Mus musculus GN=Sec61a2 PE=2 SV=3                               | 14.92 | 2  | 4  | 7  | 22  | 0.732 | 0.562 | 0.911 | 0.973 | 63.33  | 14.92 | 13 | 22  | 476  | 52.2  | 8.06 |
| P52503   | NADH dehydrogenase [ubiquinone] iron-sulfur protein 6, mitochondrial OS=Mus musculus GN=Ndufs6 PE=1 SV=2 - [NDUFS6_MOUSE]  | 62.07 | 2  | 7  | 7  | 231 | 1.915 | 1.000 | 1.438 | 0.973 | 677.55 | 62.07 | 14 | 231 | 116  | 13.0  | 8.65 |
| Q61221-2 | isoform 2 of Hypoxia-inducible factor 1-alpha OS=Mus musculus GN=Hif1a - [HIF1A_MOUSE]                                     | 3.04  | 2  | 2  | 2  | 2   | 0.400 | 0.672 | 0.724 | 0.973 | 6.18   | 3.04  | 2  | 2   | 822  | 91.8  | 5.30 |
| Q5SW75   | Protein phosphatase Slingshot homolog 2 OS=Mus musculus GN=Ssh2 PE=1 SV=2 - [SSH2_MOUSE]                                   | 11.88 | 3  | 11 | 11 | 24  | 0.959 | 1.043 | 1.227 | 0.973 | 73.49  | 11.88 | 16 | 24  | 1423 | 158.1 | 5.67 |
| Q7TSQ8   | Pyruvate dehydrogenase phosphatase regulatory subunit, mitochondrial OS=Mus musculus GN=Pdpr PE=2 SV=1 - [P DPR_MOUSE]     | 24.72 | 3  | 22 | 22 | 60  | 1.026 | 0.920 | 0.875 | 0.973 | 178.66 | 24.72 | 38 | 60  | 878  | 99.2  | 6.35 |
| Q6NXH2   | Glycoprotein endo-alpha-1,2-mannosidase OS=Mus musculus GN=Manea PE=2 SV=1 - [MANEA_MOUSE]                                 | 5.84  | 1  | 1  | 1  | 4   | 1.263 | 0.843 | 1.012 | 0.973 | 15.38  | 5.84  | 2  | 4   | 462  | 53.1  | 8.62 |
| Q8C0E2   | Vacuolar protein sorting-associated protein 26B OS=Mus musculus GN=Vps26b PE=1 SV=1 - [VP26B_MOUSE]                        | 49.11 | 2  | 17 | 18 | 121 | 0.853 | 0.966 | 0.998 | 0.973 | 329.48 | 49.11 | 33 | 121 | 336  | 39.1  | 7.37 |
| Q6NZA9   | Transcription initiation factor TFIID subunit 9B OS=Mus musculus GN=Taf9b PE=1 SV=2 - [TAF9B_MOUSE]                        | 12.85 | 3  | 1  | 3  | 13  | 1.598 | 1.363 | 1.123 | 0.973 | 33.18  | 12.85 | 6  | 13  | 249  | 27.2  | 9.58 |
| E9PX52   | Arf-GAP with SH3 domain, ANK repeat and PH domain-containing protein 2 OS=Mus musculus GN=Asap2 PE=2 SV=1 - [E9PX52_MOUSE] | 33.90 | 6  | 23 | 27 | 134 | 1.191 | 0.704 | 0.995 | 0.973 | 366.69 | 33.90 | 44 | 134 | 1000 | 111.1 | 6.80 |
| Q6ZP56   | Ankyrin repeat and IBR domain-containing protein 1 OS=Mus musculus GN=Ankib1 PE=1 SV=2 - [ANKIB1_MOUSE]                    | 20.18 | 1  | 13 | 13 | 33  | 1.134 | 1.003 | 0.964 | 0.973 | 123.85 | 20.18 | 19 | 33  | 1085 | 121.8 | 5.16 |
| D3YY36   | Protein 1300017J02Rik OS=Mus musculus GN=1300017J02Rik PE=2 SV=1 - [D3YY36_MOUSE]                                          | 22.67 | 3  | 12 | 13 | 40  | 4.561 | 1.817 | 0.577 | 0.973 | 100.42 | 22.67 | 23 | 40  | 622  | 68.6  | 7.88 |
| Q8COL8   | Conserved oligomeric Golgi complex subunit 5 OS=Mus musculus GN=Cog5 PE=2 SV=3 - [COG5_MOUSE]                              | 11.94 | 1  | 7  | 7  | 24  | 1.016 | 0.821 | 0.783 | 0.974 | 58.87  | 11.94 | 12 | 24  | 829  | 91.3  | 6.27 |
| Q9QXW4   | Fascin-3 OS=Mus musculus GN=Fscn3 PE=2 SV=2 - [FSCN3_MOUSE]                                                                | 2.61  | 1  | 1  | 1  | 1   | 1.441 | 1.502 | 1.368 | 0.974 | 2.65   | 2.61  | 1  | 1   | 498  | 56.4  | 7.53 |
| Q9D486   | C-Maf-inducing protein OS=Mus musculus GN=Cimp PE=2 SV=3 - [CHIP_MOUSE]                                                    | 13.71 | 3  | 9  | 9  | 22  | 0.579 | 1.278 | 0.897 | 0.974 | 61.21  | 13.71 | 16 | 22  | 773  | 86.2  | 6.81 |
| Q68FL6   | Methionine-tRNA ligase, cytoplasmic OS=Mus musculus GN=Mars PE=2 SV=1 - [SYMC_MOUSE]                                       | 37.36 | 1  | 1  | 32 | 107 | 0.643 | 0.944 | 0.947 | 0.974 | 285.22 | 37.36 | 58 | 107 | 902  | 101.4 | 7.14 |
| B2RXE2   | Sodium/hydrogen exchanger OS=Mus musculus GN=Slc3a5 PE=2 SV=1 - [SLC3A5_MOUSE]                                             | 6.35  | 1  | 4  | 4  | 12  | 1.475 | 1.113 | 0.873 | 0.974 | 33.90  | 6.35  | 7  | 12  | 898  | 98.9  | 7.31 |
| E9PVY0   | Serine/threonine-protein kinase MRCK alpha OS=Mus musculus GN=Cdc42bpa PE=2 SV=1 - [E9PVY0_MOUSE]                          | 34.24 | 12 | 42 | 52 | 156 | 0.962 | 0.806 | 1.031 | 0.974 | 418.46 | 34.24 | 90 | 156 | 1732 | 196.8 | 6.62 |
| Q7TMK6   | Protein Hook homolog 2 OS=Mus musculus GN=Hook2 PE=1 SV=3 - [HOOK2_MOUSE]                                                  | 10.47 | 1  | 6  | 6  | 9   | 1.214 | 1.047 | 1.057 | 0.974 | 28.02  | 10.47 | 8  | 9   | 716  | 83.3  | 5.43 |

|          |                                                                                                                                  |       |   |    |     |     |       |       |       |       |         |       |     |     |      |       |      |
|----------|----------------------------------------------------------------------------------------------------------------------------------|-------|---|----|-----|-----|-------|-------|-------|-------|---------|-------|-----|-----|------|-------|------|
| P61807   | Stannin OS=Mus musculus<br>GN=Snn PE=1 SV=1 -<br>[SNN_MOUSE]                                                                     | 67.05 | 1 | 3  | 3   | 6   | 1.458 | 0.931 | 1.026 | 0.974 | 11.41   | 67.05 | 5   | 6   | 88   | 9.5   | 5.31 |
| Q9CWK3   | CD2 antigen cytoplasmic<br>tail-binding protein 2<br>OS=Mus musculus<br>GN=Cd2bp2 PE=1 SV=1 -<br>[CD2B2_MOUSE]                   | 38.60 | 1 | 7  | 7   | 17  | 1.397 | 1.341 | 1.228 | 0.974 | 51.27   | 38.60 | 11  | 17  | 342  | 37.7  | 4.60 |
| Q6PIP5   | NudC domain-containing<br>protein 1 OS=Mus<br>musculus GN=Nudcd1<br>PE=2 SV=2 -                                                  | 20.45 | 1 | 10 | 11  | 32  | 1.115 | 0.991 | 0.899 | 0.974 | 71.20   | 20.45 | 18  | 32  | 582  | 66.7  | 5.30 |
| Q3UZV7-2 | Isoform 2 of UPF0577<br>protein KIAA1324-like<br>homolog OS=Mus<br>musculus -                                                    | 16.77 | 8 | 13 | 13  | 27  | 0.941 | 0.791 | 0.927 | 0.974 | 76.77   | 16.77 | 18  | 27  | 1014 | 112.0 | 6.16 |
| A2AMI2   | Eukaryotic translation<br>initiation factor 4 gamma 3<br>OS=Mus musculus<br>GN=EIF4g3 PE=2 SV=1 -<br>[A2AMI2_MOUSE]              | 29.70 | 6 | 1  | 39  | 155 | 0.983 | 0.784 | 0.965 | 0.974 | 437.09  | 29.70 | 70  | 155 | 1579 | 174.7 | 5.55 |
| Q9QXZ0-3 | Isoform 3 of Microtubule-<br>actin cross-linking factor 1<br>OS=Mus musculus<br>GN=Macf1 -<br>[MACF1_MOUSE]                      | 46.26 | 7 | 1  | 213 | 900 | 0.341 | 0.754 | 0.733 | 0.974 | 2601.48 | 46.26 | 378 | 900 | 5270 | 601.4 | 5.45 |
| P49813   | Tropomodulin-1 OS=Mus<br>musculus GN=Tmod1<br>PE=2 SV=2 -<br>[TMOD1_MOUSE]                                                       | 44.29 | 1 | 13 | 15  | 49  | 1.597 | 2.504 | 2.381 | 0.974 | 126.68  | 44.29 | 25  | 49  | 359  | 40.4  | 5.10 |
| Q8BXN7   | Protein phosphatase 1K,<br>mitochondrial OS=Mus<br>musculus GN=Ppm1k<br>PE=1 SV=1 -<br>[PPM1K_MOUSE]                             | 9.14  | 1 | 3  | 3   | 8   | 0.954 | 0.837 | 0.925 | 0.974 | 20.50   | 9.14  | 6   | 8   | 372  | 40.9  | 6.39 |
| Q62132-2 | Isoform Beta of Receptor-<br>type tyrosine-protein<br>phosphatase R OS=Mus<br>musculus GN=Ptprr -<br>[PTPRR_MOUSE]               | 12.75 | 3 | 7  | 7   | 13  | 0.817 | 1.517 | 1.214 | 0.975 | 36.65   | 12.75 | 10  | 13  | 549  | 61.9  | 8.12 |
| P15116   | Cadherin-2 OS=Mus<br>musculus GN=Cdh2 PE=1<br>SV=2 - [CADH2_MOUSE]                                                               | 34.77 | 2 | 20 | 20  | 97  | 0.841 | 1.265 | 1.193 | 0.975 | 255.51  | 34.77 | 37  | 97  | 906  | 99.7  | 4.78 |
| Q8BF56   | Calcineurin-like<br>phosphoesterase domain-<br>containing protein 1<br>OS=Mus musculus<br>GN=Cpped1 PE=2 SV=1 -<br>[CPED1_MOUSE] | 25.32 | 6 | 6  | 6   | 12  | 1.645 | 1.135 | 1.158 | 0.975 | 36.98   | 25.32 | 10  | 12  | 312  | 35.2  | 5.34 |
| Q91V89   | Protein Ppp2r5d OS=Mus<br>musculus GN=Ppp2r5d<br>PE=2 SV=1 -<br>[Q91V89_MOUSE]                                                   | 48.48 | 1 | 20 | 26  | 113 | 0.585 | 0.843 | 1.006 | 0.975 | 344.85  | 48.48 | 46  | 113 | 594  | 69.0  | 7.96 |
| F657U1   | Protein CD30046E11Rik<br>(Fragment) OS=Mus<br>musculus<br>GN=CD30046E11Rik PE=4<br>SV=1 - [F657U1_MOUSE]                         | 2.89  | 4 | 1  | 2   | 3   | 1.805 | 1.227 | 0.912 | 0.975 | 8.96    | 2.89  | 3   | 3   | 1314 | 146.7 | 6.00 |
| Q9CYV5   | Transmembrane protein<br>135 OS=Mus musculus<br>GN=Tmem135 PE=2 SV=1 -<br>[TM135_MOUSE]                                          | 5.46  | 3 | 2  | 3   | 4   | 0.764 | 0.771 | 0.894 | 0.975 | 11.16   | 5.46  | 4   | 4   | 458  | 52.3  | 9.50 |
| O88597   | Beclin-1 OS=Mus<br>musculus GN=Becn1 PE=1<br>SV=3 - [BECN1_MOUSE]                                                                | 24.78 | 5 | 7  | 8   | 17  | 0.736 | 1.163 | 1.167 | 0.975 | 49.52   | 24.78 | 11  | 17  | 448  | 51.6  | 4.93 |
| B1AVF4   | Midline 2 OS=Mus<br>musculus GN=Mid2 PE=4<br>SV=1 - [B1AVF4_MOUSE]                                                               | 10.95 | 4 | 6  | 6   | 12  | 1.102 | 0.915 | 0.847 | 0.975 | 30.18   | 10.95 | 8   | 12  | 685  | 77.8  | 7.03 |
| Q6NVE8   | WD repeat-containing<br>protein 44 OS=Mus<br>musculus GN=Wdr44<br>PE=1 SV=1 -                                                    | 34.21 | 2 | 28 | 28  | 74  | 1.169 | 1.173 | 1.195 | 0.975 | 189.46  | 34.21 | 46  | 74  | 915  | 101.5 | 5.24 |
| Q8BKR5   | Protein phosphatase 1<br>regulatory subunit 37<br>OS=Mus musculus<br>GN=Ppp1r37 PE=2 SV=1 -<br>[PPR37_MOUSE]                     | 16.85 | 1 | 11 | 11  | 29  | 0.939 | 1.061 | 1.121 | 0.975 | 68.69   | 16.85 | 18  | 29  | 712  | 77.5  | 5.06 |
| Q8CHY3   | Dymeclin OS=Mus<br>musculus GN=Dym PE=2<br>SV=1 - [DYM_MOUSE]                                                                    | 6.13  | 4 | 5  | 5   | 12  | 1.150 | 1.252 | 0.817 | 0.975 | 26.52   | 6.13  | 8   | 12  | 669  | 75.8  | 5.77 |
| Q9JIA6   | Galactokinase OS=Mus<br>musculus GN=Galk1 PE=2<br>SV=1 - [Q9JIA6_MOUSE]                                                          | 27.55 | 2 | 8  | 8   | 36  | 0.701 | 1.050 | 0.817 | 0.975 | 124.23  | 27.55 | 14  | 36  | 392  | 42.3  | 5.26 |
| Q8R4V1-3 | Isoform 3 of NFAT<br>activation molecule 1<br>OS=Mus musculus<br>GN=Nfam1 -                                                      | 12.21 | 3 | 2  | 2   | 3   | 0.614 | 0.934 | 0.881 | 0.975 | 6.29    | 12.21 | 3   | 3   | 213  | 24.2  | 7.77 |
| Q91YK2   | Ribosomal RNA processing<br>protein 1 homolog B<br>OS=Mus musculus<br>GN=Rrp1b PE=2 SV=2 -<br>[RRP1B_MOUSE]                      | 5.39  | 1 | 2  | 4   | 6   | 0.826 | 0.527 | 1.009 | 0.975 | 15.39   | 5.39  | 5   | 6   | 724  | 80.5  | 9.72 |
| Q9CWR1   | WD repeat-containing<br>protein 73 OS=Mus<br>musculus GN=Wdr73<br>PE=2 SV=1 -                                                    | 11.05 | 4 | 1  | 4   | 10  | 1.838 | 1.020 | 0.936 | 0.975 | 27.19   | 11.05 | 6   | 10  | 371  | 40.8  | 5.54 |
| Q99PV0   | Pre-mRNA-processing-<br>splicing factor 8 OS=Mus<br>musculus GN=Ppfb PE=1<br>SV=2 - [PRP8_MOUSE]                                 | 29.42 | 2 | 60 | 60  | 171 | 0.724 | 0.877 | 0.838 | 0.975 | 480.26  | 29.42 | 97  | 171 | 2335 | 273.4 | 8.84 |
| P97770-2 | Isoform 2 of THUMP<br>domain-containing protein<br>3 OS=Mus musculus<br>GN=Thumpd3 -<br>[THUM3_MOUSE]                            | 18.85 | 4 | 8  | 8   | 15  | 0.632 | 0.762 | 0.805 | 0.975 | 46.67   | 18.85 | 13  | 15  | 504  | 56.3  | 7.44 |

|          |                                                                                                                             |       |   |    |    |     |       |       |       |       |        |       |    |     |      |       |       |
|----------|-----------------------------------------------------------------------------------------------------------------------------|-------|---|----|----|-----|-------|-------|-------|-------|--------|-------|----|-----|------|-------|-------|
| Q8BTY2   | Sodium bicarbonate cotransporter 3 OS=Mus musculus GN=Slc4a7 PE=1 SV=2 -                                                    | 11.41 | 3 | 8  | 11 | 34  | 0.678 | 0.968 | 1.153 | 0.975 | 94.70  | 11.41 | 19 | 34  | 1034 | 116.4 | 6.24  |
| Q7TSG1-2 | Isoform 2 of Centrosomal protein of 120 kDa OS=Mus musculus GN=Cep120 -                                                     | 6.24  | 3 | 5  | 5  | 13  | 1.665 | 0.949 | 1.053 | 0.976 | 26.84  | 6.24  | 7  | 13  | 929  | 105.8 | 6.24  |
| O35127   | Protein C10 OS=Mus musculus GN=Grccl0 PE=2 SV=1 - [C10_MOUSE]                                                               | 76.19 | 1 | 6  | 6  | 26  | 1.815 | 1.190 | 1.118 | 0.976 | 80.21  | 76.19 | 12 | 26  | 126  | 13.2  | 5.14  |
| Q924L1   | LETM1 domain-containing protein 1 OS=Mus musculus GN=Letmd1 PE=2 SV=1 -                                                     | 13.89 | 3 | 5  | 5  | 15  | 1.192 | 1.215 | 0.943 | 0.976 | 53.53  | 13.89 | 9  | 15  | 360  | 41.7  | 10.54 |
| Q99LP6   | GrpE protein homolog 1, mitochondrial OS=Mus musculus GN=Grpel1 PE=1 SV=1 - [GRPE1_MOUSE]                                   | 44.24 | 1 | 10 | 10 | 46  | 1.636 | 1.111 | 1.231 | 0.976 | 111.51 | 44.24 | 17 | 46  | 217  | 24.3  | 8.38  |
| P42567   | Epidermal growth factor receptor substrate 15 OS=Mus musculus GN=Eps15 PE=1 SV=1 - [EPS15_MOUSE]                            | 41.58 | 6 | 25 | 28 | 123 | 1.408 | 0.731 | 1.039 | 0.976 | 346.83 | 41.58 | 48 | 123 | 897  | 98.4  | 4.60  |
| Q9D071-3 | Isoform 3 of MMS19 nucleotide excision repair protein homolog OS=Mus musculus GN=Mms19 - [MMS19_MOUSE]                      | 19.74 | 8 | 12 | 12 | 27  | 0.668 | 0.921 | 0.821 | 0.976 | 79.37  | 19.74 | 20 | 27  | 988  | 108.2 | 6.28  |
| O54946   | DnaJ homolog subfamily B member 6 OS=Mus musculus GN=Dnajb6 PE=1 SV=4 -                                                     | 33.42 | 4 | 2  | 10 | 38  | 0.997 | 0.845 | 0.896 | 0.976 | 107.52 | 33.42 | 16 | 38  | 365  | 39.8  | 9.36  |
| Q6P1J0   | Glycoprotein endo-alpha-1,2-mannosidase-like protein OS=Mus musculus GN=Maneal PE=2 SV=1 - [MANEL_MOUSE]                    | 4.65  | 1 | 2  | 2  | 3   | 1.082 | 0.965 | 0.859 | 0.976 | 7.79   | 4.65  | 3  | 3   | 452  | 51.1  | 7.21  |
| Q9R0Q6   | Actin-related protein 2/3 complex subunit 1A OS=Mus musculus GN=Arpc1a PE=1 SV=1 - [ARC1A_MOUSE]                            | 44.59 | 2 | 16 | 16 | 107 | 0.564 | 1.323 | 1.165 | 0.976 | 260.17 | 44.59 | 30 | 107 | 370  | 41.6  | 8.18  |
| O70582   | Arachidonate 12-lipoxygenase, 12R-type OS=Mus musculus GN=Alox12b PE=2 SV=1 - [LX12B_MOUSE]                                 | 2.43  | 1 | 1  | 2  | 2   | 2.252 | 0.565 | 1.884 | 0.976 | 2.92   | 2.43  | 2  | 2   | 701  | 80.5  | 6.71  |
| M0QWF3   | Protein 0610010F0SRik OS=Mus musculus GN=0610010F0SRik PE=4 SV=1 -                                                          | 9.40  | 3 | 5  | 6  | 8   | 1.771 | 0.861 | 1.112 | 0.976 | 25.67  | 9.40  | 7  | 8   | 713  | 81.5  | 6.46  |
| F6SMY7   | Probable E3 ubiquitin-protein ligase MYCBP2 (Fragment) OS=Mus musculus GN=Mycbp2 PE=2 SV=1 - [MYCBP2_MOUSE]                 | 11.24 | 6 | 42 | 43 | 81  | 1.077 | 0.936 | 0.942 | 0.976 | 178.06 | 11.24 | 66 | 81  | 4636 | 509.0 | 7.09  |
| Q8BNY6   | Neuronal calcium sensor 1 OS=Mus musculus GN=Ncs1 PE=2 SV=3 - [NCS1_MOUSE]                                                  | 64.74 | 1 | 12 | 12 | 68  | 0.847 | 1.283 | 1.120 | 0.976 | 183.99 | 64.74 | 22 | 68  | 190  | 21.9  | 4.83  |
| E9Q6L4   | TBC1 domain family member 1 OS=Mus musculus GN=Tbc1d1 PE=2 SV=1 -                                                           | 7.84  | 4 | 5  | 5  | 12  | 1.042 | 0.999 | 1.096 | 0.976 | 39.23  | 7.84  | 7  | 12  | 1033 | 117.2 | 6.80  |
| E9PZA8   | Synaptotagmin-7 OS=Mus musculus GN=Syt7 PE=2 SV=1 - [E9PZA8_MOUSE]                                                          | 51.50 | 2 | 5  | 25 | 155 | 0.477 | 1.491 | 1.713 | 0.976 | 452.23 | 51.50 | 43 | 155 | 567  | 63.1  | 9.44  |
| Q9CX00   | IST1 homolog OS=Mus musculus GN=Ist1 PE=2 SV=1 - [IST1_MOUSE]                                                               | 26.52 | 1 | 9  | 9  | 38  | 0.852 | 1.394 | 0.931 | 0.976 | 101.31 | 26.52 | 17 | 38  | 362  | 39.4  | 5.44  |
| Q9DBQ7-3 | Isoform 3 of Protein-associating with the carboxyl-terminal domain of ezrin OS=Mus musculus GN=Scyl3 - [SCYL3_MOUSE]        | 1.66  | 2 | 1  | 1  | 2   | 1.172 | 1.323 | 0.770 | 0.976 | 2.93   | 1.66  | 1  | 2   | 722  | 80.0  | 5.15  |
| Q9EPS2   | Peptide YY OS=Mus musculus GN=Pyy PE=2 SV=2 - [PYY_MOUSE]                                                                   | 6.12  | 2 | 1  | 1  | 1   | 1.134 | 1.023 | 0.732 | 0.976 | 1.90   | 6.12  | 1  | 1   | 98   | 11.1  | 5.45  |
| Q7TSS2   | Ubiquitin-conjugating enzyme E2 Q1 OS=Mus musculus GN=Ube2q1 PE=2 SV=2 -                                                    | 26.30 | 3 | 8  | 10 | 22  | 0.867 | 1.054 | 0.898 | 0.976 | 61.26  | 26.30 | 17 | 22  | 422  | 46.1  | 5.10  |
| D3Z108   | Transmembrane and ubiquitin-like domain-containing protein 1 (Fragment) OS=Mus musculus GN=Tmub1 PE=2 SV=1 - [D3Z108_MOUSE] | 19.61 | 4 | 3  | 3  | 10  | 0.928 | 0.883 | 0.887 | 0.977 | 31.09  | 19.61 | 5  | 10  | 204  | 21.6  | 4.82  |
| P70425   | GTP-binding protein Rit2 OS=Mus musculus GN=Rit2 PE=1 SV=1 - [RIT2_MOUSE]                                                   | 25.81 | 3 | 5  | 5  | 11  | 0.634 | 0.719 | 0.762 | 0.977 | 33.93  | 25.81 | 9  | 11  | 217  | 24.8  | 6.92  |
| Q9D0M5   | Dynein light chain 2, cytoplasmic OS=Mus musculus GN=Dynl2 PE=1 SV=1 - [DYL2_MOUSE]                                         | 67.42 | 2 | 4  | 6  | 215 | 1.420 | 0.889 | 0.846 | 0.977 | 682.30 | 67.42 | 10 | 215 | 89   | 10.3  | 7.37  |
| E9QAD4   | Coiled-coil domain-containing protein 93 OS=Mus musculus GN=Cdc93 PE=2 SV=1 - [E9QAD4_MOUSE]                                | 32.64 | 2 | 19 | 19 | 47  | 1.109 | 0.850 | 1.004 | 0.977 | 135.73 | 32.64 | 31 | 47  | 628  | 72.4  | 8.29  |

|          |                                                                                                                       |       |    |    |    |     |       |       |       |       |        |       |    |     |      |       |       |
|----------|-----------------------------------------------------------------------------------------------------------------------|-------|----|----|----|-----|-------|-------|-------|-------|--------|-------|----|-----|------|-------|-------|
| P98063   | Bone morphogenetic protein 1 OS=Mus musculus GN=Bmp1 PE=1 SV=2 - [BMP1_MOUSE]                                         | 1.61  | 1  | 1  | 1  | 4   | 1.050 | 0.603 | 1.624 | 0.977 | 10.15  | 1.61  | 2  | 4   | 991  | 111.6 | 6.95  |
| Q6ZQ08   | CCR4-NOT transcription complex subunit 1 OS=Mus musculus GN=Cnot1 PE=1 SV=2 - [CNOT1_MOUSE]                           | 17.64 | 5  | 35 | 35 | 114 | 0.747 | 1.022 | 0.907 | 0.977 | 306.46 | 17.64 | 61 | 114 | 2375 | 266.6 | 7.11  |
| Q8CGQ8-2 | Isoform 2 of Sodium/potassium/calcium exchanger 4 OS=Mus musculus GN=Slc24a4 - [NCKX4_MOUSE]                          | 12.27 | 7  | 7  | 7  | 28  | 0.652 | 1.725 | 1.265 | 0.977 | 61.46  | 12.27 | 12 | 28  | 554  | 61.1  | 7.93  |
| Q9E500   | Ubiquitin conjugation factor E4 B OS=Mus musculus GN=Ube4b PE=1 SV=3                                                  | 23.70 | 4  | 18 | 20 | 67  | 0.738 | 0.955 | 0.869 | 0.977 | 184.76 | 23.70 | 33 | 67  | 1173 | 133.2 | 6.07  |
| P02463   | Collagen alpha-1(IV) chain OS=Mus musculus GN=Col4a1 PE=2 SV=4 - [C04A1_MOUSE]                                        | 9.11  | 1  | 7  | 9  | 53  | 1.679 | 1.198 | 0.999 | 0.977 | 126.86 | 9.11  | 14 | 53  | 1669 | 160.6 | 8.24  |
| Q8BFW4   | Tripartite motif-containing protein 65 OS=Mus musculus GN=Trim65 PE=2 SV=1                                            | 5.75  | 2  | 2  | 3  | 5   | 1.731 | 0.969 | 1.171 | 0.977 | 0.00   | 5.75  | 3  | 5   | 522  | 58.4  | 6.93  |
| Q148I2   | Metabotropic glutamate receptor 2 OS=Mus musculus GN=Grm2 PE=2 SV=2 - [GRM2_MOUSE]                                    | 23.28 | 1  | 15 | 21 | 69  | 0.499 | 0.964 | 1.177 | 0.977 | 199.11 | 23.28 | 30 | 69  | 872  | 95.8  | 8.06  |
| Q6ZQ06   | Centrosomal protein of 162 kDa OS=Mus musculus GN=Cep162 PE=1 SV=2                                                    | 3.56  | 2  | 3  | 5  | 13  | 3.956 | 1.478 | 0.606 | 0.977 | 29.13  | 3.56  | 6  | 13  | 1403 | 160.8 | 5.53  |
| Q3UHE1-2 | Isoform 2 of Membrane-associated phosphatidylinositol transfer protein 3 OS=Mus musculus GN=Pitpnm3 - [PITPNM3_MOUSE] | 16.08 | 2  | 11 | 11 | 37  | 0.946 | 0.974 | 1.081 | 0.977 | 112.54 | 16.08 | 18 | 37  | 958  | 104.7 | 7.12  |
| Q922U1   | U4/U6 small nuclear ribonucleoprotein Prp3 OS=Mus musculus GN=Prpf3 PE=1 SV=1 - [PRPF3_MOUSE]                         | 10.98 | 2  | 6  | 7  | 17  | 0.923 | 0.875 | 1.025 | 0.977 | 33.01  | 10.98 | 12 | 17  | 683  | 77.4  | 9.50  |
| Q3U422   | NADH dehydrogenase [ubiquinone] flavoprotein 3, mitochondrial OS=Mus musculus GN=Ndufv3 PE=2 SV=1                     | 64.32 | 1  | 16 | 21 | 94  | 1.680 | 0.817 | 1.335 | 0.977 | 201.63 | 64.32 | 37 | 94  | 468  | 50.5  | 8.97  |
| Q91Y32   | Sorting nexin-4 OS=Mus musculus GN=Snx4 PE=2 SV=1 - [SNX4_MOUSE]                                                      | 52.00 | 1  | 21 | 21 | 59  | 0.815 | 0.995 | 0.847 | 0.978 | 169.27 | 52.00 | 37 | 59  | 450  | 51.7  | 5.80  |
| P84086   | Complexin-2 OS=Mus musculus GN=Cplx2 PE=1 SV=1 - [CPLX2_MOUSE]                                                        | 47.76 | 2  | 3  | 6  | 89  | 1.024 | 1.736 | 1.749 | 0.978 | 225.21 | 47.76 | 10 | 89  | 134  | 15.4  | 5.08  |
| P54923   | [Protein ADP-ribosylarginine] hydrolase OS=Mus musculus GN=Adprh PE=2 SV=1 - [ADPRH_MOUSE]                            | 44.48 | 1  | 13 | 13 | 93  | 0.936 | 1.167 | 0.874 | 0.978 | 273.63 | 44.48 | 25 | 93  | 362  | 40.0  | 5.76  |
| Q9DB29   | Isoamyl acetate-hydrolyzing esterase 1 homolog OS=Mus musculus GN=lah1 PE=2 SV=1 - [IAH1_MOUSE]                       | 42.97 | 1  | 8  | 8  | 26  | 1.309 | 0.807 | 0.749 | 0.978 | 67.87  | 42.97 | 14 | 26  | 249  | 28.0  | 5.52  |
| Q8BGR2   | Leucine-rich repeat-containing protein 8D OS=Mus musculus GN=Lrrc8d PE=2 SV=1 - [LRC8D_MOUSE]                         | 15.37 | 1  | 9  | 10 | 18  | 0.823 | 1.186 | 1.052 | 0.978 | 60.24  | 15.37 | 14 | 18  | 859  | 98.1  | 7.44  |
| P70279   | Surfeit locus protein 6 OS=Mus musculus GN=Surf6 PE=2 SV=1 - [SURF6_MOUSE]                                            | 10.14 | 2  | 2  | 4  | 4   | 0.560 | 0.658 | 1.024 | 0.978 | 8.02   | 10.14 | 4  | 4   | 355  | 41.2  | 10.52 |
| E9PV26   | Protein BC068157 OS=Mus musculus GN=BC068157 PE=2 SV=1 - [E9PV26_MOUSE]                                               | 23.41 | 3  | 18 | 18 | 74  | 1.095 | 1.045 | 1.376 | 0.978 | 245.63 | 23.41 | 34 | 74  | 1098 | 110.6 | 9.98  |
| Q8R3H9   | Tetratricopeptide repeat protein 4 OS=Mus musculus GN=Ttc4 PE=2 SV=1 - [TTC4_MOUSE]                                   | 8.29  | 3  | 4  | 4  | 8   | 1.156 | 0.890 | 0.893 | 0.978 | 21.04  | 8.29  | 7  | 8   | 386  | 44.3  | 5.22  |
| O55176   | E3 ubiquitin-protein ligase Prg1 OS=Mus musculus GN=Prg1 PE=1 SV=3 - [PJA1_MOUSE]                                     | 15.40 | 6  | 6  | 6  | 16  | 1.192 | 0.588 | 1.305 | 0.978 | 41.67  | 15.40 | 11 | 16  | 578  | 63.9  | 4.97  |
| E9QMC2   | Metabotropic glutamate receptor 5 OS=Mus musculus GN=Grim5 PE=2 SV=1 - [E9QMC2_MOUSE]                                 | 28.69 | 3  | 1  | 31 | 111 | 0.738 | 0.530 | 1.175 | 0.978 | 308.13 | 28.69 | 48 | 111 | 1171 | 128.2 | 7.58  |
| P05480   | Neuronal proto-oncogene tyrosine-protein kinase Src OS=Mus musculus GN=Src PE=1 SV=4 [SRC_MOUSE]                      | 40.48 | 4  | 14 | 20 | 63  | 0.777 | 1.263 | 0.964 | 0.978 | 160.21 | 40.48 | 34 | 63  | 541  | 60.6  | 7.84  |
| P59481   | VIP36-like protein OS=Mus musculus GN=Lman2l PE=2 SV=1 - [LMA2L_MOUSE]                                                | 28.53 | 4  | 8  | 8  | 19  | 0.621 | 0.762 | 0.716 | 0.978 | 54.49  | 28.53 | 14 | 19  | 347  | 39.9  | 9.41  |
| Q8CBW3-2 | Isoform 2 of Abi interactor 1 OS=Mus musculus GN=Abi1 - [ABI1_MOUSE]                                                  | 45.74 | 11 | 12 | 15 | 105 | 0.991 | 1.031 | 1.380 | 0.978 | 287.27 | 45.74 | 28 | 105 | 446  | 48.5  | 7.06  |
| Q8C180   | Fibroblast growth factor receptor substrate 2 OS=Mus musculus GN=Fr32 PE=1 SV=3 - [FRS2_MOUSE]                        | 22.24 | 1  | 7  | 8  | 25  | 1.072 | 1.099 | 1.231 | 0.979 | 76.04  | 22.24 | 13 | 25  | 508  | 56.8  | 6.16  |

|          |                                                                                                                               |       |   |    |    |     |       |       |       |       |        |       |    |     |      |       |      |
|----------|-------------------------------------------------------------------------------------------------------------------------------|-------|---|----|----|-----|-------|-------|-------|-------|--------|-------|----|-----|------|-------|------|
| Q61029-3 | Isoform Epsilon of Lamina-associated polypeptide 2, isoforms beta/delta/epsilon/gamma OS=Mus musculus GN=Tmpe - [LAP2B_MOUSE] | 48.54 | 5 | 7  | 15 | 101 | 0.864 | 0.772 | 0.883 | 0.979 | 310.55 | 48.54 | 29 | 101 | 412  | 46.0  | 9.22 |
| Q99K95   | Protein RTF2 homolog OS=Mus musculus GN=Rtfdc1 PE=2 SV=1 - [RTF2_MOUSE]                                                       | 6.51  | 1 | 2  | 2  | 3   | 0.942 | 0.646 | 1.269 | 0.979 | 6.13   | 6.51  | 3  | 3   | 307  | 33.9  | 8.81 |
| P32261   | Antithrombin-III OS=Mus musculus GN=Serpinc1 PE=1 SV=1 - [ANT3_MOUSE]                                                         | 35.05 | 1 | 14 | 14 | 49  | 2.787 | 2.336 | 0.543 | 0.979 | 158.97 | 35.05 | 24 | 49  | 465  | 52.0  | 6.46 |
| Q6PGN3-3 | Isoform 3 of Serine/threonine-protein kinase DCLK2 OS=Mus musculus GN=Dck2 - [DCLK2_MOUSE]                                    | 45.01 | 6 | 24 | 25 | 92  | 0.603 | 0.800 | 1.033 | 0.979 | 301.90 | 45.01 | 40 | 92  | 771  | 84.4  | 8.62 |
| Q80TL7-2 | Isoform 2 of Protein MON2 homolog OS=Mus musculus GN=Mon2 - [MON2_MOUSE]                                                      | 15.93 | 3 | 24 | 25 | 57  | 0.760 | 1.084 | 0.850 | 0.979 | 154.10 | 15.93 | 39 | 57  | 1708 | 188.2 | 6.09 |
| Q9EQN3   | TSC22 domain family protein 4 OS=Mus musculus GN=Tsc22d4 PE=2 SV=2 -                                                          | 43.15 | 3 | 7  | 12 | 58  | 1.453 | 0.984 | 1.097 | 0.979 | 154.05 | 43.15 | 21 | 58  | 387  | 40.0  | 8.13 |
| P60229   | Eukaryotic translation initiation factor 3 subunit E OS=Mus musculus GN=Elf3e PE=1 SV=1 - [EIF3E_MOUSE]                       | 35.28 | 1 | 14 | 14 | 63  | 0.774 | 1.099 | 0.865 | 0.979 | 161.54 | 35.28 | 24 | 63  | 445  | 52.2  | 6.04 |
| Q8BGX3   | Leucine-rich repeat and transmembrane domain-containing protein 2 OS=Mus musculus GN=Lrtm2 PE=2 SV=1 - [LRTM2_MOUSE]          | 20.54 | 1 | 6  | 6  | 18  | 0.567 | 1.138 | 1.065 | 0.979 | 58.75  | 20.54 | 9  | 18  | 370  | 41.0  | 6.40 |
| Q3U308   | Cytoplasmic tRNA 2-thiolation protein 2 OS=Mus musculus GN=Ctu2 PE=2 SV=1 - [CTU2_MOUSE]                                      | 14.59 | 4 | 5  | 5  | 26  | 0.720 | 0.899 | 0.761 | 0.979 | 76.22  | 14.59 | 10 | 26  | 514  | 56.1  | 7.08 |
| P56481   | Gastrin/cholecystokinin type B receptor OS=Mus musculus GN=Cckbr PE=2 SV=1 - [GASR_MOUSE]                                     | 5.08  | 1 | 1  | 1  | 2   | 0.341 | 2.015 | 1.990 | 0.979 | 3.24   | 5.08  | 2  | 2   | 453  | 49.1  | 9.79 |
| Q8R3Z5-4 | Isoform 4 of Voltage-dependent L-type calcium channel subunit beta-1 OS=Mus musculus GN=Cacnb1 - [CACNB1_MOUSE]               | 38.36 | 3 | 1  | 15 | 73  | 1.944 | 1.805 | 1.471 | 0.979 | 246.64 | 38.36 | 27 | 73  | 524  | 57.7  | 6.81 |
| Q8R5A6   | TBC1 domain family member 22A OS=Mus musculus GN=Tbcd22a PE=2 SV=3 -                                                          | 9.88  | 2 | 3  | 5  | 10  | 1.142 | 1.094 | 1.267 | 0.979 | 24.75  | 9.88  | 7  | 10  | 516  | 59.3  | 6.46 |
| Q570Y9-2 | Isoform 2 of DEP domain-containing mTOR-interacting protein OS=Mus musculus GN=Deptor - [DEPTOR_MOUSE]                        | 18.14 | 4 | 5  | 5  | 10  | 1.013 | 0.769 | 1.248 | 0.979 | 19.47  | 18.14 | 9  | 10  | 397  | 45.2  | 8.65 |
| Q9D9M5   | Pyridoxal phosphate phosphatase PHOSPHO2 OS=Mus musculus GN=Phospho2 PE=2 SV=1 - [PHOP2_MOUSE]                                | 12.03 | 2 | 3  | 3  | 4   | 0.905 | 0.903 | 0.884 | 0.979 | 10.67  | 12.03 | 4  | 4   | 241  | 27.5  | 6.54 |
| Q3UH99   | Protein shisa-6 homolog OS=Mus musculus GN=Shisa6 PE=2 SV=1 - [SHS46_MOUSE]                                                   | 18.67 | 1 | 1  | 9  | 31  | 0.936 | 0.871 | 1.148 | 0.979 | 70.07  | 18.67 | 16 | 31  | 525  | 58.4  | 9.48 |
| Q9CZW6   | E3 ubiquitin-protein ligase RNF146 OS=Mus musculus GN=Rnf146 PE=1 SV=2 - [RNF146_MOUSE]                                       | 17.55 | 2 | 6  | 6  | 12  | 2.172 | 1.065 | 1.327 | 0.979 | 29.77  | 17.55 | 9  | 12  | 359  | 38.9  | 5.20 |
| Q9E546   | Beta-parvin OS=Mus musculus GN=Parvb PE=1 SV=1 - [PARVB_MOUSE]                                                                | 26.03 | 3 | 5  | 7  | 30  | 0.659 | 1.050 | 0.716 | 0.979 | 94.41  | 26.03 | 13 | 30  | 365  | 41.6  | 6.33 |
| O88878   | ANI-type zinc finger protein 5 OS=Mus musculus GN=Zfand5 PE=1 SV=1 -                                                          | 37.09 | 3 | 6  | 6  | 10  | 2.249 | 0.979 | 1.254 | 0.979 | 32.32  | 37.09 | 7  | 10  | 213  | 23.0  | 8.51 |
| Q8CCB4   | Vacuolar protein sorting-associated protein 53 homolog OS=Mus musculus GN=Vps53 PE=2 SV=1 - [VPS53_MOUSE]                     | 33.53 | 8 | 22 | 22 | 52  | 0.535 | 1.091 | 0.961 | 0.979 | 146.16 | 33.53 | 34 | 52  | 832  | 94.4  | 6.61 |
| Q99PL8   | Thiamine transporter 2 OS=Mus musculus GN=Slc19a3 PE=2 SV=2 - [S19A3_MOUSE]                                                   | 3.28  | 1 | 1  | 1  | 2   | 0.806 | 0.816 | 1.187 | 0.979 | 3.07   | 3.28  | 2  | 2   | 488  | 55.0  | 6.96 |
| Q62376   | U1 small nuclear ribonucleoprotein 70 kDa OS=Mus musculus GN=Snmp70 PE=1 SV=2 - [RU17_MOUSE]                                  | 18.97 | 2 | 9  | 9  | 34  | 0.715 | 0.984 | 0.916 | 0.979 | 89.79  | 18.97 | 15 | 34  | 448  | 52.0  | 9.94 |
| D3YWNS   | Leucine-rich repeat-containing protein 49 OS=Mus musculus GN=Lrrc49 PE=2 SV=1 - [D3YWNS_MOUSE]                                | 10.00 | 9 | 7  | 8  | 12  | 1.165 | 0.873 | 0.892 | 0.979 | 27.89  | 10.00 | 10 | 12  | 680  | 78.3  | 8.00 |
| O35344   | Importin subunit alpha-4 OS=Mus musculus GN=Kpn3 PE=1 SV=1 - [IMA4_MOUSE]                                                     | 18.62 | 1 | 4  | 8  | 35  | 0.772 | 0.921 | 0.963 | 0.979 | 84.16  | 18.62 | 14 | 35  | 521  | 57.7  | 4.94 |

|          |                                                                                                                     |       |   |    |    |     |       |       |       |       |        |       |    |     |      |       |      |
|----------|---------------------------------------------------------------------------------------------------------------------|-------|---|----|----|-----|-------|-------|-------|-------|--------|-------|----|-----|------|-------|------|
| E9QP62   | LIM and senescent cell antigen-like-containing domain protein 1 OS=Mus musculus GN=Lims1 PE=2 SV=1 - [E9QP62_MOUSE] | 17.83 | 3 | 4  | 7  | 14  | 1.734 | 1.433 | 1.040 | 0.979 | 36.98  | 17.83 | 12 | 14  | 387  | 44.3  | 7.88 |
| O55003   | BCL2/adenovirus E1B 19 kDa protein-interacting protein 3 OS=Mus musculus GN=Bnip3 PE=1 SV=1 - [BNIP3_MOUSE]         | 22.99 | 1 | 6  | 6  | 18  | 0.920 | 0.814 | 1.110 | 0.979 | 50.93  | 22.99 | 10 | 18  | 187  | 21.0  | 7.14 |
| Q9CQT1   | Methylthioninose-1-phosphate isomerase OS=Mus musculus GN=Mri1 PE=2 SV=1 - [MTNA_MOUSE]                             | 44.44 | 3 | 11 | 11 | 39  | 1.425 | 0.975 | 0.904 | 0.980 | 82.56  | 44.44 | 17 | 39  | 369  | 39.4  | 5.91 |
| P17918   | Proliferating cell nuclear antigen OS=Mus musculus GN=Pcna PE=1 SV=2 - [PCNA_MOUSE]                                 | 21.07 | 2 | 4  | 4  | 15  | 1.922 | 0.961 | 1.202 | 0.980 | 49.38  | 21.07 | 5  | 15  | 261  | 28.8  | 4.77 |
| A2A108   | Taperin OS=Mus musculus GN=Tprn PE=1 SV=1 - [TPRN_MOUSE]                                                            | 20.43 | 1 | 7  | 8  | 19  | 1.538 | 0.621 | 0.959 | 0.980 | 54.13  | 20.43 | 13 | 19  | 749  | 80.0  | 7.09 |
| Q3TCW6   | Macrophage metalloelastase OS=Mus musculus GN=Mmp12 PE=2 SV=1 -                                                     | 2.48  | 2 | 1  | 1  | 1   | 1.044 | 0.638 | 1.339 | 0.980 | 2.05   | 2.48  | 1  | 1   | 403  | 46.8  | 9.03 |
| O08989   | Ras-related protein M-Ras OS=Mus musculus GN=Mras PE=1 SV=1 - [RASM_MOUSE]                                          | 45.19 | 2 | 9  | 9  | 33  | 0.711 | 1.013 | 0.967 | 0.980 | 89.43  | 45.19 | 12 | 33  | 208  | 23.9  | 8.78 |
| Q8R1F1   | Niban-like protein 1 OS=Mus musculus GN=Fam129b PE=1 SV=2 - [NIBL1_MOUSE]                                           | 17.36 | 2 | 13 | 14 | 29  | 0.918 | 1.377 | 0.819 | 0.980 | 62.53  | 17.36 | 24 | 29  | 749  | 84.8  | 5.94 |
| Q8BW22   | Calcium-responsive transactivator OS=Mus musculus GN=Ss18l1 PE=1 SV=1 -                                             | 6.22  | 1 | 3  | 3  | 11  | 1.072 | 1.001 | 1.088 | 0.980 | 44.01  | 6.22  | 6  | 11  | 402  | 43.7  | 6.58 |
| P26450   | Phosphatidylinositol 3-kinase regulatory subunit alpha OS=Mus musculus GN=Pik3r1 PE=1 SV=2 - [P85A_MOUSE]           | 19.20 | 7 | 11 | 14 | 35  | 1.081 | 1.056 | 0.996 | 0.980 | 71.63  | 19.20 | 23 | 35  | 724  | 83.5  | 6.28 |
| Q8BGY4-3 | Isoform 3 of Kelch-like protein 26 OS=Mus musculus GN=Kih26 - [KLH26_MOUSE]                                         | 2.10  | 4 | 1  | 1  | 1   | 2.039 | 1.229 | 0.916 | 0.980 | 2.39   | 2.10  | 1  | 1   | 525  | 58.7  | 6.93 |
| P97298   | Pigment epithelium-derived factor OS=Mus musculus GN=Serpinf1 PE=1 SV=2 -                                           | 5.28  | 1 | 1  | 1  | 2   | 1.594 | 1.653 | 1.161 | 0.980 | 8.47   | 5.28  | 2  | 2   | 417  | 46.2  | 6.98 |
| Q8BTU1   | UPF0468 protein C16orf80 homolog OS=Mus musculus GN=Gt13 PE=2 SV=1 - [CP080_MOUSE]                                  | 10.36 | 1 | 2  | 2  | 2   | 0.706 | 0.846 | 0.630 | 0.980 | 6.74   | 10.36 | 2  | 2   | 193  | 22.7  | 9.76 |
| Q9CQJ2   | PIH1 domain-containing protein 1 OS=Mus musculus GN=Ph1d1 PE=2 SV=1 -                                               | 16.90 | 4 | 4  | 4  | 12  | 1.109 | 0.899 | 0.880 | 0.980 | 28.41  | 16.90 | 8  | 12  | 290  | 32.2  | 5.21 |
| Q3TYE5   | Limbic system-associated membrane protein OS=Mus musculus GN=Lsamp PE=2 SV=1 - [Q3TYE5_MOUSE]                       | 52.66 | 3 | 17 | 18 | 322 | 0.988 | 1.052 | 1.017 | 0.980 | 977.02 | 52.66 | 33 | 322 | 338  | 37.3  | 6.68 |
| Q8CHE4   | PH domain leucine-rich repeat-containing protein phosphatase 1 OS=Mus musculus GN=Phlp1 PE=2 SV=2 -                 | 15.59 | 1 | 19 | 20 | 47  | 1.214 | 0.575 | 0.944 | 0.980 | 132.02 | 15.59 | 30 | 47  | 1687 | 182.3 | 6.19 |
| B9EJ86   | Oxysterol-binding protein OS=Mus musculus GN=Osbp18 PE=2 SV=1 - [B9EJ86_MOUSE]                                      | 28.23 | 2 | 19 | 21 | 55  | 1.094 | 0.846 | 1.230 | 0.980 | 161.62 | 28.23 | 33 | 55  | 889  | 101.2 | 6.96 |
| Q8JZM4   | Delta and Notch-like epidermal growth factor-related receptor OS=Mus musculus GN=Dner PE=1 SV=1 - [DNER_MOUSE]      | 8.28  | 1 | 5  | 5  | 18  | 0.758 | 1.282 | 1.027 | 0.980 | 52.41  | 8.28  | 9  | 18  | 737  | 78.7  | 5.10 |
| D3YU40   | Insulin-like growth factor-binding protein 2 OS=Mus musculus GN=Igfbp2 PE=2 SV=1 - [D3YU40_MOUSE]                   | 27.22 | 2 | 2  | 3  | 9   | 3.544 | 0.838 | 0.832 | 0.980 | 33.75  | 27.22 | 5  | 9   | 158  | 17.7  | 8.85 |
| F8WJA7   | AF4/FMR2 family member 3 OS=Mus musculus GN=Atf3 PE=2 SV=1 - [F8WJA7_MOUSE]                                         | 1.63  | 6 | 2  | 2  | 2   | 1.848 | 1.070 | 1.179 | 0.980 | 2.26   | 1.63  | 2  | 2   | 1228 | 133.1 | 8.22 |
| Q61335   | B-cell receptor-associated protein 31 OS=Mus musculus GN=Bcap31 PE=1 SV=4 -                                         | 32.65 | 1 | 8  | 8  | 27  | 0.744 | 0.835 | 0.783 | 0.980 | 74.84  | 32.65 | 13 | 27  | 245  | 27.9  | 8.70 |
| Q8BHE5   | Bone morphogenetic protein 3 OS=Mus musculus GN=Bmp3 PE=1 SV=1 - [BMP3_MOUSE]                                       | 2.78  | 1 | 1  | 1  | 2   | 0.890 | 1.183 | 1.067 | 0.980 | 5.06   | 2.78  | 2  | 2   | 468  | 52.7  | 9.38 |
| P61089   | Ubiquitin-conjugating enzyme E2 N OS=Mus musculus GN=Ube2n PE=1 SV=1 -                                              | 50.66 | 2 | 8  | 8  | 46  | 0.832 | 0.979 | 0.874 | 0.980 | 150.47 | 50.66 | 14 | 46  | 152  | 17.1  | 6.57 |
| P62881-2 | Isoform 2 of Guanine nucleotide-binding protein subunit beta-5 OS=Mus musculus GN=Gnb5 - [GBB5_MOUSE]               | 46.46 | 2 | 16 | 16 | 89  | 0.996 | 1.133 | 1.143 | 0.981 | 303.33 | 46.46 | 29 | 89  | 353  | 38.7  | 6.06 |
| A2RT62   | F-box/LRR-repeat protein 16 OS=Mus musculus GN=Fbxl16 PE=2 SV=1 - [FXL16_MOUSE]                                     | 32.78 | 1 | 11 | 11 | 60  | 0.672 | 2.042 | 1.638 | 0.981 | 170.59 | 32.78 | 22 | 60  | 479  | 51.8  | 6.60 |

|          |                                                                                                                                                   |       |    |    |    |     |       |       |       |       |        |       |    |     |      |       |       |
|----------|---------------------------------------------------------------------------------------------------------------------------------------------------|-------|----|----|----|-----|-------|-------|-------|-------|--------|-------|----|-----|------|-------|-------|
| A2ANY6   | Midasin OS=Mus musculus<br>GN=Mdn1 PE=2 SV=1 -<br>[A2ANY6_MOUSE]                                                                                  | 0.54  | 2  | 3  | 3  | 4   | 1.733 | 0.979 | 0.795 | 0.981 | 7.35   | 0.54  | 3  | 4   | 5589 | 629.9 | 5.72  |
| Q9QYE9-4 | Isoform 4 of Pleckstrin<br>homology domain-<br>containing family B<br>member 1 OS=Mus<br>musculus GN=Plekhh1 -<br>[Q9QYE9_MOUSE]                  | 48.15 | 7  | 4  | 7  | 51  | 1.922 | 0.596 | 0.894 | 0.981 | 165.42 | 48.15 | 13 | 51  | 189  | 21.3  | 6.10  |
| E0CYK4   | Repressor of RNA<br>polymerase III<br>transcription MAF1<br>homolog (Fragment)<br>OS=Mus musculus<br>GN=Maf1 PE=2 SV=1 -<br>[E0CYK4_MOUSE]        | 25.74 | 3  | 2  | 2  | 8   | 1.253 | 1.268 | 1.010 | 0.981 | 30.40  | 25.74 | 4  | 8   | 202  | 22.2  | 5.39  |
| E9PUL5   | Proline-rich<br>transmembrane protein 2<br>OS=Mus musculus<br>GN=Prrt2 PE=1 SV=1 -<br>[E9PUL5_MOUSE]                                              | 37.86 | 1  | 6  | 6  | 102 | 0.875 | 1.203 | 1.425 | 0.981 | 186.25 | 37.86 | 10 | 102 | 346  | 35.9  | 4.63  |
| E9QJ50   | 28S ribosomal protein S10,<br>mitochondrial OS=Mus<br>musculus GN=Mps10<br>PE=3 SV=1 -<br>[E9QJ50_MOUSE]                                          | 19.38 | 5  | 3  | 3  | 8   | 0.982 | 0.784 | 0.985 | 0.981 | 17.03  | 19.38 | 6  | 8   | 160  | 18.7  | 8.13  |
| D3YZR8   | Bcl2 antagonist of cell<br>death OS=Mus musculus<br>GN=Bad PE=2 SV=1 -<br>[D3YZR8_MOUSE]                                                          | 50.56 | 5  | 5  | 5  | 34  | 0.984 | 0.792 | 1.079 | 0.981 | 129.85 | 50.56 | 10 | 34  | 178  | 19.3  | 6.11  |
| B2KF67   | Diphosphoinositol<br>polyphosphate<br>phosphohydrolase 1<br>OS=Mus musculus<br>GN=Nudt3 PE=2 SV=1 -<br>[B2KF67_MOUSE]                             | 61.87 | 5  | 5  | 6  | 60  | 1.779 | 1.033 | 1.060 | 0.981 | 151.38 | 61.87 | 12 | 60  | 139  | 15.7  | 6.79  |
| Q149M0   | C-type lectin domain<br>family 12 member B<br>OS=Mus musculus<br>GN=Clec12b PE=2 SV=1 -<br>[Q149M0_MOUSE]                                         | 6.18  | 1  | 1  | 1  | 1   | 1.619 | 1.201 | 1.030 | 0.981 | 0.00   | 6.18  | 1  | 1   | 275  | 31.2  | 5.17  |
| F6YWH6   | Disintegrin and<br>metalloproteinase domain-<br>containing protein 12<br>(Fragment) OS=Mus<br>musculus GN=Adam12<br>PE=2 SV=1 -<br>[F6YWH6_MOUSE] | 1.03  | 2  | 1  | 1  | 1   | 1.603 | 0.850 | 0.857 | 0.981 | 1.96   | 1.03  | 1  | 1   | 581  | 62.6  | 8.31  |
| Q4VBD2   | Transmembrane anterior<br>posterior transformation<br>protein 1 OS=Mus<br>musculus GN=Tap1 PE=2<br>SV=2 - [TAPT1_MOUSE]                           | 23.23 | 1  | 11 | 11 | 26  | 0.809 | 0.793 | 0.919 | 0.981 | 67.72  | 23.23 | 18 | 26  | 564  | 63.9  | 8.22  |
| Q99MK8   | Beta-adrenergic receptor<br>kinase 1 OS=Mus<br>musculus GN=Adrbk1<br>PE=2 SV=2 -                                                                  | 28.01 | 7  | 14 | 19 | 73  | 0.730 | 1.124 | 0.928 | 0.981 | 207.53 | 28.01 | 34 | 73  | 689  | 79.6  | 7.28  |
| Q99KP6   | Pre-mRNA-processing<br>factor 19 OS=Mus<br>musculus GN=Prpf19<br>PE=2 SV=1 -                                                                      | 35.12 | 4  | 11 | 11 | 41  | 0.909 | 0.916 | 0.810 | 0.981 | 106.92 | 35.12 | 18 | 41  | 504  | 55.2  | 6.61  |
| Q99N23   | Carbonic anhydrase 15<br>OS=Mus musculus<br>GN=Ca15 PE=2 SV=1 -<br>[CAH15_MOUSE]                                                                  | 4.01  | 1  | 1  | 1  | 1   | 0.362 | 1.521 | 0.861 | 0.981 | 2.67   | 4.01  | 1  | 1   | 324  | 35.5  | 6.79  |
| Q8BUU7   | N-acetylgalactosamine<br>kinase OS=Mus musculus<br>GN=Galk2 PE=2 SV=1 -<br>[Q8BUU7_MOUSE]                                                         | 23.94 | 2  | 7  | 7  | 19  | 0.668 | 1.565 | 0.838 | 0.981 | 59.96  | 23.94 | 12 | 19  | 447  | 49.3  | 6.73  |
| Q9CQL4   | 39S ribosomal protein L20,<br>mitochondrial OS=Mus<br>musculus GN=Mpl20<br>PE=1 SV=1 -<br>[RM20_MOUSE]                                            | 21.48 | 1  | 3  | 3  | 5   | 1.634 | 1.278 | 0.914 | 0.981 | 15.06  | 21.48 | 5  | 5   | 149  | 17.6  | 11.11 |
| Q6VNS1   | NT-3 growth factor<br>receptor OS=Mus<br>musculus GN=Ntrk3 PE=1<br>SV=1 - [NTRK3_MOUSE]                                                           | 20.73 | 3  | 11 | 16 | 46  | 0.981 | 1.752 | 1.095 | 0.981 | 127.31 | 20.73 | 26 | 46  | 825  | 92.7  | 6.67  |
| O35954   | Membrane-associated<br>phosphatidylinositol<br>transfer protein 1 OS=Mus<br>musculus GN=Plpnm1<br>PE=1 SV=1 -<br>[O35954_MOUSE]                   | 38.37 | 2  | 30 | 31 | 140 | 0.596 | 0.930 | 0.935 | 0.981 | 444.16 | 38.37 | 56 | 140 | 1243 | 134.9 | 6.06  |
| A2AQ45   | Formin-binding protein 1<br>OS=Mus musculus<br>GN=Fhbp1 PE=2 SV=1 -<br>[A2AQ45_MOUSE]                                                             | 42.30 | 13 | 22 | 22 | 82  | 1.470 | 0.577 | 0.966 | 0.981 | 228.10 | 42.30 | 35 | 82  | 591  | 68.9  | 5.68  |
| Q9WVP1   | AP-1 complex subunit mu-<br>2 OS=Mus musculus<br>GN=Ap1m2 PE=1 SV=3 -<br>[AP1M2_MOUSE]                                                            | 11.35 | 2  | 1  | 4  | 12  | 1.191 | 1.193 | 1.216 | 0.981 | 30.87  | 11.35 | 6  | 12  | 423  | 48.1  | 7.55  |
| Q6ZPJ3   | Ubiquitin-conjugating<br>enzyme E2 O OS=Mus<br>musculus GN=Ube2o<br>PE=1 SV=3 -                                                                   | 38.28 | 1  | 39 | 40 | 202 | 0.792 | 0.844 | 0.948 | 0.981 | 564.73 | 38.28 | 72 | 202 | 1288 | 140.7 | 5.06  |
| Q9JJV2   | Profilin-2 OS=Mus<br>musculus GN=Pfn2 PE=1<br>SV=3 - [PROF2_MOUSE]                                                                                | 67.86 | 4  | 10 | 10 | 181 | 1.558 | 1.051 | 0.994 | 0.981 | 557.71 | 67.86 | 19 | 181 | 140  | 15.0  | 6.99  |
| Q8R3C0   | Mini-chromosome<br>maintenance complex-<br>binding protein OS=Mus<br>musculus GN=Mcm1p<br>PE=2 SV=1 -<br>[MCM1_MOUSE]                             | 11.37 | 2  | 5  | 5  | 8   | 0.779 | 1.047 | 0.865 | 0.981 | 22.15  | 11.37 | 7  | 8   | 642  | 72.8  | 5.66  |
| P49443   | Protein phosphatase 1A<br>OS=Mus musculus<br>GN=Ppm1a PE=1 SV=1 -<br>[PPM1A_MOUSE]                                                                | 47.64 | 1  | 12 | 16 | 131 | 1.014 | 0.916 | 0.985 | 0.981 | 374.82 | 47.64 | 31 | 131 | 382  | 42.4  | 5.36  |
| Q8BH79   | Anoctamin-10 OS=Mus<br>musculus GN=Ano10<br>PE=2 SV=1 -<br>[ANO10_MOUSE]                                                                          | 14.26 | 4  | 8  | 9  | 16  | 0.815 | 0.898 | 0.790 | 0.981 | 43.81  | 14.26 | 12 | 16  | 659  | 76.1  | 6.70  |

|          |                                                                                                                                      |       |    |    |    |     |       |       |       |       |         |       |    |     |      |       |       |
|----------|--------------------------------------------------------------------------------------------------------------------------------------|-------|----|----|----|-----|-------|-------|-------|-------|---------|-------|----|-----|------|-------|-------|
| Q6ZQH8   | Nucleoporin NUP188 homolog OS=Mus musculus GN=Nup188 PE=1 SV=2 -                                                                     | 8.13  | 5  | 9  | 9  | 16  | 0.508 | 0.916 | 0.920 | 0.981 | 52.59   | 8.13  | 16 | 16  | 1759 | 196.6 | 7.01  |
| Q9D8T7-2 | Isoform 2 of SRA stem-loop-interacting RNA-binding protein, mitochondrial OS=Mus musculus GN=Slirp - re trn ksrnc1                   | 50.51 | 4  | 3  | 3  | 21  | 0.988 | 0.964 | 1.013 | 0.982 | 50.63   | 50.51 | 6  | 21  | 99   | 10.9  | 8.59  |
| Q8BTI8   | Serine/arginine repetitive matrix protein 2 OS=Mus musculus GN=Srm2 PE=1 SV=3 - [SRRM2_MOUSE]                                        | 24.23 | 3  | 46 | 46 | 187 | 0.994 | 0.906 | 1.047 | 0.982 | 519.54  | 24.23 | 73 | 187 | 2703 | 294.7 | 12.03 |
| Q3UI47   | Kinesin family member 3A, isoform CRA_b OS=Mus musculus GN=Kif3a PE=2 SV=1 - [Q3UI47_MOUSE]                                          | 26.79 | 6  | 17 | 18 | 51  | 0.810 | 0.931 | 1.064 | 0.982 | 149.92  | 26.79 | 28 | 51  | 698  | 79.8  | 6.64  |
| Q8VD12   | Zinc finger protein 385A OS=Mus musculus GN=Znf385a PE=1 SV=2 - [Z385A_MOUSE]                                                        | 19.95 | 2  | 6  | 6  | 9   | 1.023 | 0.480 | 0.952 | 0.982 | 20.82   | 19.95 | 7  | 9   | 386  | 40.4  | 9.86  |
| Q8VC69   | Solute carrier family 22 member 6 OS=Mus musculus GN=Slc22a6 PE=1 SV=1 -                                                             | 9.72  | 1  | 5  | 5  | 17  | 0.758 | 2.653 | 0.885 | 0.982 | 30.82   | 9.72  | 7  | 17  | 545  | 60.0  | 9.10  |
| P35821   | Tyrosine-protein phosphatase non-receptor type 1 OS=Mus musculus GN=Ptpn1 PE=1 SV=2 - [PTN1_MOUSE]                                   | 20.37 | 1  | 7  | 7  | 20  | 1.015 | 1.112 | 1.001 | 0.982 | 49.02   | 20.37 | 11 | 20  | 432  | 49.6  | 6.16  |
| P05532-2 | Isoform 2 of Mast/stem cell growth factor receptor Kit OS=Mus musculus GN=Kit - [KIT_MOUSE]                                          | 10.05 | 10 | 9  | 10 | 36  | 0.886 | 1.582 | 1.015 | 0.982 | 86.05   | 10.05 | 18 | 36  | 975  | 108.9 | 7.11  |
| Q9D0B1   | Zinc finger protein 524 OS=Mus musculus GN=Znf524 PE=2 SV=1 - [ZNS24_MOUSE]                                                          | 4.05  | 1  | 1  | 1  | 1   | 1.475 | 1.119 | 1.013 | 0.982 | 2.61    | 4.05  | 1  | 1   | 321  | 34.8  | 8.62  |
| Q91XX0   | MCG133388, isoform CRA_r OS=Mus musculus GN=Pcdhgc4 PE=2 SV=1 - [Q91XX0_MOUSE]                                                       | 7.44  | 1  | 3  | 5  | 21  | 0.903 | 0.818 | 0.814 | 0.982 | 57.11   | 7.44  | 8  | 21  | 941  | 101.2 | 5.27  |
| Q9ERU9   | E3 SUMO-protein ligase RanBP2 OS=Mus musculus GN=Ranbp2 PE=1 SV=2 - [RBP2_MOUSE]                                                     | 23.29 | 1  | 60 | 62 | 158 | 0.819 | 0.983 | 1.017 | 0.982 | 476.32  | 23.29 | 95 | 158 | 3053 | 340.9 | 6.18  |
| B9EKI5   | Casitas B-lineage lymphoma b OS=Mus musculus GN=Cblb PE=1 SV=1 - [B9EKI5_MOUSE]                                                      | 9.59  | 3  | 4  | 6  | 10  | 1.543 | 1.294 | 1.188 | 0.982 | 33.28   | 9.59  | 10 | 10  | 938  | 104.5 | 8.02  |
| Q9WUD8   | Fas apoptotic inhibitory molecule 1 OS=Mus musculus GN=Faim PE=1 SV=1 - [FAIM1_MOUSE]                                                | 21.79 | 3  | 5  | 5  | 9   | 1.627 | 0.917 | 1.064 | 0.982 | 22.28   | 21.79 | 8  | 9   | 179  | 20.2  | 5.64  |
| Q9JMH6-2 | Isoform 2 of Thioredoxin reductase 1, cytoplasmic OS=Mus musculus GN=Txnrd1 -                                                        | 43.69 | 2  | 15 | 16 | 71  | 1.570 | 0.833 | 0.761 | 0.982 | 218.06  | 43.69 | 29 | 71  | 499  | 54.5  | 6.33  |
| Q9R0K7   | Plasma membrane calcium-transporting ATPase 2 OS=Mus musculus GN=Atp2b2 PE=1 SV=2 - [AT2B2_MOUSE]                                    | 43.49 | 2  | 30 | 50 | 494 | 0.713 | 0.735 | 1.264 | 0.982 | 1391.82 | 43.49 | 89 | 494 | 1198 | 132.5 | 5.96  |
| Q8C845   | EF-hand domain-containing protein D2 OS=Mus musculus GN=Efh2 PE=2 SV=1 -                                                             | 51.67 | 2  | 13 | 16 | 206 | 1.627 | 0.994 | 1.375 | 0.982 | 592.65  | 51.67 | 29 | 206 | 240  | 26.8  | 5.14  |
| Q6TCG2   | Progesterin and adipoQ receptor family member 9 OS=Mus musculus GN=Pqgr9 PE=2 SV=2 - [PAQR9_MOUSE]                                   | 2.40  | 1  | 1  | 1  | 5   | 0.956 | 0.852 | 1.101 | 0.982 | 10.72   | 2.40  | 2  | 5   | 375  | 42.7  | 8.76  |
| D3Z375   | Astrocytic phosphoprotein PEA-15 (Fragment) OS=Mus musculus GN=Pea15a PE=2 SV=1 - [D3Z375_MOUSE]                                     | 64.13 | 2  | 3  | 5  | 96  | 1.933 | 1.586 | 1.407 | 0.982 | 311.89  | 64.13 | 10 | 96  | 92   | 10.7  | 4.64  |
| O88967   | ATP-dependent zinc metalloprotease YME1L1 OS=Mus musculus GN=Yme1l1 PE=2 SV=1 - [YME1_MOUSE]                                         | 22.10 | 1  | 12 | 13 | 28  | 0.943 | 1.197 | 0.853 | 0.982 | 74.40   | 22.10 | 22 | 28  | 715  | 80.0  | 8.97  |
| P97470   | Serine/threonine-protein phosphatase 4 catalytic subunit OS=Mus musculus GN=Ppp4c PE=1 SV=2 - [PP4C_MOUSE]                           | 19.87 | 1  | 3  | 5  | 32  | 1.670 | 1.045 | 0.836 | 0.982 | 105.99  | 19.87 | 8  | 32  | 307  | 35.1  | 5.06  |
| Q11136   | Xaa-Pro dipeptidase OS=Mus musculus GN=Pept PE=2 SV=3 - [PEPD_MOUSE]                                                                 | 43.00 | 2  | 19 | 19 | 84  | 2.089 | 0.825 | 0.698 | 0.982 | 253.62  | 43.00 | 36 | 84  | 493  | 55.0  | 5.78  |
| Q7TMQ7   | WD repeat-containing protein 91 OS=Mus musculus GN=Wdr91 PE=1 SV=1 -                                                                 | 16.84 | 3  | 12 | 12 | 27  | 0.779 | 0.961 | 0.947 | 0.982 | 67.79   | 16.84 | 19 | 27  | 748  | 83.4  | 6.64  |
| F8WIES   | E3 ubiquitin-protein ligase HECTD1 OS=Mus musculus GN=Hectd1 PE=2 SV=1 -                                                             | 18.47 | 4  | 42 | 43 | 117 | 0.723 | 0.871 | 0.812 | 0.982 | 323.09  | 18.47 | 68 | 117 | 2610 | 289.0 | 5.36  |
| Q6ZWR4   | Serine/threonine-protein phosphatase 2A 55 kDa regulatory subunit B beta isoform OS=Mus musculus GN=Ppp2r2b PE=1 SV=1 - [ZABB_MOUSE] | 21.44 | 4  | 3  | 10 | 34  | 0.488 | 1.387 | 1.126 | 0.983 | 79.64   | 21.44 | 16 | 34  | 443  | 51.7  | 6.44  |



|          |                                                                                                               |       |   |    |    |     |       |       |       |       |         |       |    |     |      |       |      |
|----------|---------------------------------------------------------------------------------------------------------------|-------|---|----|----|-----|-------|-------|-------|-------|---------|-------|----|-----|------|-------|------|
| A2ANU3   | Synapse differentiation-inducing gene protein 1<br>OS=Mus musculus<br>GN=Syndig1 PE=1 SV=1 -<br>[SYNG1_MOUSE] | 12.40 | 5 | 3  | 3  | 5   | 0.773 | 0.587 | 1.028 | 0.983 | 13.04   | 12.40 | 5  | 5   | 258  | 28.4  | 4.88 |
| Q8BT60   | Copine-3 OS=Mus musculus<br>GN=Cpne3 PE=1 SV=2 - [CPNE3_MOUSE]                                                | 25.52 | 1 | 11 | 13 | 68  | 1.045 | 1.007 | 0.864 | 0.983 | 163.46  | 25.52 | 20 | 68  | 533  | 59.5  | 5.78 |
| Q810K9   | Glucoside xylosyltransferase 2<br>OS=Mus musculus<br>GN=Gxylt2 PE=2 SV=1 -                                    | 3.38  | 1 | 1  | 1  | 1   | 0.354 | 1.193 | 0.922 | 0.983 | 2.64    | 3.38  | 1  | 1   | 444  | 51.4  | 9.80 |
| Q62074   | Protein kinase C iota type<br>OS=Mus musculus<br>GN=Prki PE=1 SV=3 -<br>[KPCL_MOUSE]                          | 6.39  | 2 | 3  | 3  | 5   | 0.921 | 0.771 | 1.117 | 0.983 | 14.73   | 6.39  | 4  | 5   | 595  | 68.2  | 5.85 |
| Q91VU7   | Protein Pus7 OS=Mus musculus<br>GN=Pus7 PE=2 SV=2 - [Q91VU7_MOUSE]                                            | 15.45 | 4 | 8  | 8  | 20  | 1.591 | 1.284 | 0.948 | 0.983 | 42.42   | 15.45 | 11 | 20  | 660  | 74.7  | 5.87 |
| Q6NS59-2 | Isoform 2 of Protein FAM135A OS=Mus musculus<br>GN=Fam135a - [F135A_MOUSE]                                    | 2.13  | 2 | 2  | 2  | 3   | 1.214 | 1.184 | 1.264 | 0.983 | 5.74    | 2.13  | 2  | 3   | 1081 | 118.3 | 5.45 |
| Q3UH13   | Tubby-related protein 4<br>OS=Mus musculus<br>GN=Tulp4 PE=2 SV=1 -<br>[Q3UH13_MOUSE]                          | 6.20  | 3 | 6  | 6  | 11  | 0.752 | 0.754 | 1.011 | 0.983 | 28.97   | 6.20  | 9  | 11  | 1354 | 147.8 | 7.66 |
| Q9CPQ9   | Fructose-bisphosphate aldolase OS=Mus musculus<br>GN=Aldoat1 PE=2 SV=1 -                                      | 52.75 | 2 | 1  | 22 | 753 | 1.527 | 3.523 | 1.093 | 0.983 | 2226.89 | 52.75 | 39 | 753 | 364  | 39.3  | 7.37 |
| E9Q446   | E3 ubiquitin-protein ligase RNF25 OS=Mus musculus<br>GN=Rnf25 PE=2 SV=1 -<br>[E9Q446_MOUSE]                   | 23.52 | 6 | 7  | 7  | 24  | 1.165 | 0.761 | 1.104 | 0.984 | 69.24   | 23.52 | 11 | 24  | 455  | 51.1  | 6.19 |
| P38060   | Hydroxymethylglutaryl-CoA lyase, mitochondrial<br>OS=Mus musculus<br>GN=Hmgcl PE=1 SV=2 -<br>[HMGCL_MOUSE]    | 37.23 | 1 | 9  | 10 | 30  | 0.857 | 1.131 | 0.910 | 0.984 | 88.12   | 37.23 | 19 | 30  | 325  | 34.2  | 8.41 |
| Q7TQK4   | Exosome complex component RRP40<br>OS=Mus musculus<br>GN=Exosc3 PE=1 SV=3 -<br>[EXOS3_MOUSE]                  | 27.37 | 2 | 4  | 4  | 5   | 1.990 | 1.243 | 0.991 | 0.984 | 20.19   | 27.37 | 5  | 5   | 274  | 29.5  | 8.06 |
| Q8BTZ7   | Mannose-1-phosphate guanylyltransferase beta<br>OS=Mus musculus<br>GN=Gmppb PE=2 SV=1 -<br>[GMPPB_MOUSE]      | 20.00 | 1 | 5  | 5  | 18  | 0.624 | 0.867 | 0.859 | 0.984 | 56.63   | 20.00 | 10 | 18  | 360  | 39.9  | 6.74 |
| Q80Z10-2 | Isoform 2 of Astrotactin-2<br>OS=Mus musculus<br>GN=Astrn2 - [ASTN2_MOUSE]                                    | 17.36 | 3 | 15 | 15 | 49  | 0.801 | 0.787 | 0.890 | 0.984 | 138.82  | 17.36 | 24 | 49  | 1348 | 148.8 | 6.02 |
| D6RFQ2   | Peroxisomal membrane protein 11B OS=Mus musculus<br>GN=Pex11b PE=2 SV=1 -                                     | 16.67 | 1 | 1  | 5  | 11  | 1.354 | 1.082 | 0.968 | 0.984 | 23.05   | 16.67 | 8  | 11  | 366  | 39.8  | 9.22 |
| P70255-5 | Isoform 5 of Nuclear factor 1 C-type OS=Mus musculus<br>GN=Nfic - [NFIC_MOUSE]                                | 9.02  | 7 | 3  | 3  | 7   | 1.231 | 0.801 | 0.924 | 0.984 | 18.78   | 9.02  | 6  | 7   | 377  | 42.1  | 8.38 |
| Q8BH74   | Nuclear pore complex protein Nup107 OS=Mus musculus<br>GN=Nup107 PE=2 SV=1 -<br>[NU107_MOUSE]                 | 17.93 | 2 | 13 | 14 | 28  | 0.946 | 1.078 | 0.929 | 0.984 | 76.08   | 17.93 | 21 | 28  | 926  | 106.6 | 5.43 |
| Q9ESX5   | H/ACA ribonucleoprotein complex subunit 4<br>OS=Mus musculus<br>GN=Dkc1 PE=1 SV=4 -<br>[DKC1_MOUSE]           | 10.02 | 4 | 5  | 5  | 11  | 0.591 | 0.708 | 0.802 | 0.984 | 34.28   | 10.02 | 8  | 11  | 509  | 57.4  | 9.28 |
| E9Q855   | Secretory carrier-associated membrane protein 3 OS=Mus musculus<br>GN=Scamp3 PE=2 SV=1 -                      | 34.60 | 3 | 7  | 7  | 44  | 0.714 | 1.054 | 0.983 | 0.984 | 157.70  | 34.60 | 11 | 44  | 315  | 34.5  | 8.16 |
| Q9JHW2   | Omega-amidase NIT2<br>OS=Mus musculus<br>GN=Nit2 PE=1 SV=1 -<br>[NIT2_MOUSE]                                  | 62.68 | 1 | 15 | 15 | 58  | 1.524 | 1.039 | 0.889 | 0.984 | 167.87  | 62.68 | 27 | 58  | 276  | 30.5  | 6.90 |
| Q8R0J7   | Vacuolar protein sorting-associated protein 37B<br>OS=Mus musculus<br>GN=Vps37b PE=2 SV=1 -<br>[VP37B_MOUSE]  | 30.18 | 1 | 5  | 5  | 16  | 2.177 | 1.453 | 1.206 | 0.984 | 36.21   | 30.18 | 9  | 16  | 285  | 31.0  | 7.05 |
| Q99K01   | Pyridoxal-dependent decarboxylase domain-containing protein 1<br>OS=Mus musculus<br>GN=Pdxdc1 PE=1 SV=2 -     | 28.46 | 6 | 17 | 17 | 65  | 0.739 | 0.800 | 0.761 | 0.984 | 218.88  | 28.46 | 30 | 65  | 787  | 87.3  | 5.48 |
| Q9QZB9   | Dynactin subunit 5<br>OS=Mus musculus<br>GN=Dctn5 PE=1 SV=1 -<br>[DCTN5_MOUSE]                                | 24.18 | 1 | 4  | 4  | 12  | 1.057 | 0.941 | 0.946 | 0.984 | 31.87   | 24.18 | 6  | 12  | 182  | 20.1  | 8.02 |
| P29416   | Beta-hexosaminidase subunit alpha OS=Mus musculus<br>GN=Hexa PE=2 SV=2 - [HEXA_MOUSE]                         | 23.48 | 1 | 9  | 9  | 27  | 0.834 | 1.233 | 0.905 | 0.984 | 86.09   | 23.48 | 16 | 27  | 528  | 60.6  | 6.54 |
| P46935   | E3 ubiquitin-protein ligase NEDD4 OS=Mus musculus<br>GN=Nedd4 PE=1 SV=3 -<br>[NEDD4_MOUSE]                    | 37.43 | 3 | 25 | 29 | 118 | 0.734 | 1.037 | 0.881 | 0.984 | 363.17  | 37.43 | 52 | 118 | 887  | 102.6 | 5.26 |
| Q6DIC6   | Protein Tro OS=Mus musculus<br>GN=Tro PE=2 SV=1 - [Q6DIC6_MOUSE]                                              | 6.37  | 6 | 8  | 9  | 25  | 0.687 | 0.543 | 0.922 | 0.984 | 62.18   | 6.37  | 14 | 25  | 2087 | 205.9 | 9.31 |

|          |                                                                                                                   |       |    |    |    |    |        |       |       |       |        |       |    |    |      |       |      |
|----------|-------------------------------------------------------------------------------------------------------------------|-------|----|----|----|----|--------|-------|-------|-------|--------|-------|----|----|------|-------|------|
| Q9JKY0   | Cell differentiation protein RCD1 homolog OS=Mus musculus GN=Rqcd1 PE=1 SV=1 - [RCD1_MOUSE]                       | 9.70  | 1  | 3  | 3  | 8  | 0.970  | 1.213 | 0.936 | 0.984 | 21.64  | 9.70  | 6  | 8  | 299  | 33.6  | 8.03 |
| Q5XJV6   | Serine/threonine-protein kinase LMTK3 OS=Mus musculus GN=Lmtk3 PE=1 SV=1 - [LMTK3_MOUSE]                          | 21.35 | 4  | 23 | 23 | 86 | 1.391  | 1.280 | 1.338 | 0.984 | 220.03 | 21.35 | 43 | 86 | 1424 | 150.8 | 4.88 |
| Q8K199   | COX assembly mitochondrial protein 2 homolog OS=Mus musculus GN=Cmc2 PE=2 SV=1 - [COXM2_MOUSE]                    | 12.66 | 1  | 1  | 1  | 4  | 0.999  | 0.529 | 1.019 | 0.984 | 7.35   | 12.66 | 2  | 4  | 79   | 9.4   | 8.24 |
| B7ZNY3   | Pard3 protein OS=Mus musculus GN=Pard3 PE=2 SV=1 - [B7ZNY3_MOUSE]                                                 | 13.34 | 20 | 2  | 13 | 33 | 1.023  | 0.552 | 0.907 | 0.984 | 99.26  | 13.34 | 21 | 33 | 1319 | 147.4 | 8.15 |
| O89032-3 | Isoform 3 of SH3 and PX domain-containing protein 2A OS=Mus musculus GN=Sh3pxd2a - [SPD2A_MOUSE]                  | 10.18 | 3  | 8  | 8  | 18 | 0.877  | 1.042 | 1.988 | 0.984 | 56.41  | 10.18 | 13 | 18 | 1081 | 119.0 | 8.18 |
| Q9CPU4   | Microsomal glutathione S-transferase 3 OS=Mus musculus GN=Mgst3 PE=1 SV=1 - [MGST3_MOUSE]                         | 24.84 | 1  | 3  | 3  | 53 | 1.070  | 0.894 | 1.103 | 0.985 | 228.47 | 24.84 | 6  | 53 | 153  | 16.9  | 9.50 |
| Q6NSW3-4 | Isoform 4 of A-kinase anchor protein SPHKAP OS=Mus musculus GN=Sphkap -                                           | 15.57 | 5  | 17 | 18 | 42 | 0.929  | 1.378 | 1.145 | 0.985 | 100.40 | 15.57 | 30 | 42 | 1586 | 173.2 | 5.08 |
| P47811-3 | Isoform 3 of Mitogen-activated protein kinase 14 OS=Mus musculus GN=Mapk14 - [MK14_MOUSE]                         | 16.67 | 13 | 4  | 5  | 28 | 0.838  | 1.092 | 1.089 | 0.985 | 54.40  | 16.67 | 8  | 28 | 360  | 41.5  | 5.97 |
| Q8BH58-3 | Isoform 3 of Syntabulin OS=Mus musculus GN=Sybu - [SYBU_MOUSE]                                                    | 7.08  | 6  | 2  | 4  | 13 | 0.920  | 1.093 | 1.011 | 0.985 | 42.63  | 7.08  | 8  | 13 | 593  | 64.6  | 5.91 |
| Q9CPQ3   | Mitochondrial import receptor subunit TOM22 homolog OS=Mus musculus GN=Tomm22 PE=2 SV=3 - [TOM22_MOUSE]           | 33.10 | 1  | 3  | 3  | 46 | 0.789  | 0.963 | 0.985 | 0.985 | 132.65 | 33.10 | 6  | 46 | 142  | 15.5  | 4.34 |
| Q3UVD5   | Leucine-rich repeat-containing G-protein coupled receptor 6 OS=Mus musculus GN=Lgr6 PE=2 SV=1 - [LGR6_MOUSE]      | 3.21  | 1  | 2  | 2  | 2  | 20.074 | 2.481 | 2.235 | 0.985 | 2.44   | 3.21  | 2  | 2  | 967  | 104.2 | 6.07 |
| Q8BZ81   | Leucine-rich repeat transmembrane neuronal protein 3 OS=Mus musculus GN=Lrrtm3 PE=2 SV=2 - [LRRTM3_MOUSE]         | 16.49 | 3  | 4  | 5  | 9  | 1.172  | 1.425 | 1.158 | 0.985 | 27.17  | 16.49 | 7  | 9  | 582  | 66.0  | 9.19 |
| Q91W53   | Golgin subfamily A member 7 OS=Mus musculus GN=Golga7 PE=2 SV=1 -                                                 | 35.04 | 2  | 5  | 5  | 18 | 1.000  | 0.601 | 0.901 | 0.985 | 35.90  | 35.04 | 9  | 18 | 137  | 15.8  | 7.05 |
| P22892   | AP-1 complex subunit gamma-1 OS=Mus musculus GN=Ap1g1 PE=1 SV=3 - [AP1G1_MOUSE]                                   | 33.09 | 3  | 23 | 23 | 62 | 0.643  | 0.970 | 0.815 | 0.985 | 185.91 | 33.09 | 36 | 62 | 822  | 91.3  | 6.80 |
| Q2VPA6-3 | Isoform 3 of Helicase POLQ-like OS=Mus musculus GN=Helq - [HELQ_MOUSE]                                            | 6.07  | 5  | 3  | 4  | 4  | 1.005  | 0.884 | 0.841 | 0.985 | 9.83   | 6.07  | 4  | 4  | 824  | 92.0  | 6.20 |
| Q9CQW2   | ADP-ribosylation factor-like protein 8B OS=Mus musculus GN=Ar18b PE=2 SV=1 - [ARL8B_MOUSE]                        | 47.85 | 1  | 4  | 9  | 42 | 0.838  | 1.015 | 0.866 | 0.985 | 123.48 | 47.85 | 15 | 42 | 186  | 21.5  | 8.43 |
| Q80X71   | Transmembrane protein 106B OS=Mus musculus GN=Tmem106b PE=2 SV=1 - [T106B_MOUSE]                                  | 12.00 | 4  | 3  | 3  | 8  | 0.896  | 1.008 | 1.000 | 0.985 | 27.31  | 12.00 | 5  | 8  | 275  | 31.2  | 6.68 |
| Q8COM2   | Ahydrolase domain-containing protein 4 OS=Mus musculus GN=Abhd4 PE=2 SV=1 - [Q8COM2_MOUSE]                        | 22.96 | 3  | 8  | 8  | 29 | 0.642  | 0.576 | 0.741 | 0.985 | 82.48  | 22.96 | 14 | 29 | 318  | 36.0  | 8.27 |
| H3BL68   | PAB-dependent poly(A)-specific ribonuclease subunit 3 (Fragment) OS=Mus musculus GN=Pan3 PE=4 SV=1 - [PAN3_MOUSE] | 10.93 | 4  | 1  | 1  | 2  | 0.828  | 0.982 | 1.005 | 0.985 | 7.04   | 10.93 | 2  | 2  | 183  | 19.0  | 6.77 |
| Q62361   | Pro-thyrotropin-releasing hormone OS=Mus musculus GN=Trh PE=2 SV=2 - [TRH_MOUSE]                                  | 10.94 | 1  | 3  | 3  | 4  | 2.538  | 1.762 | 0.608 | 0.985 | 6.92   | 10.94 | 4  | 4  | 256  | 29.2  | 5.88 |
| E9Q819   | Protein furry homolog OS=Mus musculus GN=Fry PE=1 SV=1 - [FRY_MOUSE]                                              | 14.04 | 3  | 34 | 38 | 95 | 0.785  | 1.010 | 1.071 | 0.985 | 272.58 | 14.04 | 64 | 95 | 3020 | 338.9 | 6.01 |
| D3Z795   | Proteasome assembly chaperone 1 OS=Mus musculus GN=Psmg1 PE=2 SV=1 -                                              | 24.25 | 2  | 5  | 5  | 13 | 0.805  | 0.935 | 0.834 | 0.985 | 44.56  | 24.25 | 10 | 13 | 268  | 30.5  | 7.12 |
| E9PYL2   | Protein Prr12 OS=Mus musculus GN=Prr12 PE=2 SV=1 - [E9PYL2_MOUSE]                                                 | 9.09  | 1  | 9  | 9  | 21 | 1.175  | 1.177 | 1.014 | 0.985 | 56.63  | 9.09  | 13 | 21 | 2035 | 211.7 | 7.65 |
| D3YUI2   | MKL/myocardin-like protein 1 OS=Mus musculus GN=Mkl1 PE=2 SV=1 - [D3YUI2_MOUSE]                                   | 8.99  | 4  | 6  | 6  | 14 | 1.121  | 0.925 | 1.587 | 0.985 | 41.55  | 8.99  | 10 | 14 | 879  | 93.3  | 5.54 |

|          |                                                                                                                          |       |   |    |    |      |       |       |       |       |         |       |    |      |      |       |      |
|----------|--------------------------------------------------------------------------------------------------------------------------|-------|---|----|----|------|-------|-------|-------|-------|---------|-------|----|------|------|-------|------|
| Q9CRD0-3 | Isoform 3 of OCIA domain-containing protein 1<br>OS=Mus musculus<br>GN=Ociad1 -<br>[OCAD1_MOUSE]                         | 60.85 | 1 | 1  | 7  | 40   | 1.008 | 0.923 | 1.016 | 0.985 | 123.11  | 60.85 | 13 | 40   | 189  | 20.8  | 7.81 |
| D3Z3D9   | Beta-chimaerin OS=Mus musculus<br>GN=Chn2 PE=2<br>SV=1 - [D3Z3D9_MOUSE]                                                  | 21.43 | 2 | 3  | 3  | 8    | 1.268 | 0.779 | 1.213 | 0.985 | 24.73   | 21.43 | 5  | 8    | 196  | 22.4  | 8.37 |
| Q9ER16   | Retinol dehydrogenase 14<br>OS=Mus musculus<br>GN=Rdh14 PE=1 SV=1 -<br>[RDH14_MOUSE]                                     | 41.32 | 1 | 11 | 11 | 42   | 0.656 | 1.069 | 0.914 | 0.985 | 127.59  | 41.32 | 18 | 42   | 334  | 36.3  | 8.18 |
| Q9WV30   | Nuclear factor of activated T-cells 5 OS=Mus musculus<br>GN=Nfat5 PE=2<br>SV=1 - [NFAT5_MOUSE]                           | 10.45 | 5 | 8  | 10 | 22   | 1.155 | 0.751 | 1.286 | 0.986 | 62.76   | 10.45 | 16 | 22   | 1225 | 132.1 | 5.35 |
| P00755   | Kallikrein 1-related peptidase b1 OS=Mus musculus<br>GN=Kik1b1 PE=2 SV=1 -                                               | 4.98  | 8 | 2  | 2  | 2    | 0.337 | 2.019 | 1.082 | 0.986 | 2.21    | 4.98  | 2  | 2    | 261  | 29.0  | 8.10 |
| Q3TXR6   | Peroxisomal N(1)-acetyl-spermine/spermidine oxidase OS=Mus musculus<br>GN=Paox PE=2 SV=1 -<br>[Q3TXR6_MOUSE]             | 18.61 | 3 | 6  | 6  | 18   | 1.495 | 1.059 | 0.955 | 0.986 | 42.31   | 18.61 | 11 | 18   | 274  | 30.3  | 6.01 |
| Q3UPH7-3 | Isoform 3 of Rho guanine nucleotide exchange factor 40 OS=Mus musculus<br>GN=Arhgef40 -<br>[ARH40_MOUSE]                 | 5.72  | 4 | 6  | 7  | 13   | 0.782 | 0.900 | 0.873 | 0.986 | 32.83   | 5.72  | 11 | 13   | 1469 | 160.1 | 5.58 |
| Q8N9S3-3 | Isoform 3 of Activator of 90 kDa heat shock protein ATPase homolog 2 OS=Mus musculus<br>GN=Ahsa2 -                       | 18.18 | 6 | 4  | 5  | 14   | 1.031 | 0.900 | 0.880 | 0.986 | 36.66   | 18.18 | 9  | 14   | 286  | 32.4  | 8.10 |
| Q91Z78   | BC12 adenovirus E1B 19 kDa protein-interacting protein 3-like OS=Mus musculus<br>GN=Bnip3l PE=2<br>SV=1 - [Q91Z78_MOUSE] | 11.76 | 2 | 1  | 2  | 6    | 0.848 | 1.159 | 1.038 | 0.986 | 16.43   | 11.76 | 4  | 6    | 204  | 22.3  | 5.52 |
| Q99JN2   | Kelch-like protein 22 OS=Mus musculus<br>GN=Klh22 PE=1 SV=1 -<br>[KLH22_MOUSE]                                           | 16.40 | 7 | 9  | 10 | 26   | 0.586 | 1.049 | 0.951 | 0.986 | 64.23   | 16.40 | 15 | 26   | 634  | 71.6  | 5.71 |
| E9Q4K7   | Protein Kif13b OS=Mus musculus<br>GN=Kif13b PE=2<br>SV=1 - [E9Q4K7_MOUSE]                                                | 11.45 | 1 | 14 | 16 | 29   | 0.995 | 0.897 | 0.864 | 0.986 | 81.21   | 11.45 | 26 | 29   | 1843 | 204.4 | 5.80 |
| P37172   | Actinin receptor type-1 OS=Mus musculus<br>GN=Acrv1 PE=2 SV=2 -<br>[ACVR1_MOUSE]                                         | 8.45  | 1 | 2  | 2  | 5    | 1.849 | 0.748 | 0.851 | 0.986 | 2.52    | 8.45  | 3  | 5    | 509  | 57.2  | 7.33 |
| P62259   | 14-3-3 protein epsilon OS=Mus musculus<br>GN=Ywhae PE=1 SV=1 -<br>[1433E_MOUSE]                                          | 80.00 | 3 | 21 | 24 | 1129 | 1.669 | 1.231 | 0.992 | 0.986 | 3385.42 | 80.00 | 42 | 1129 | 255  | 29.2  | 4.74 |
| Q9DCM7   | Nucleus accumbens-associated protein 2 OS=Mus musculus<br>GN=Nacc2 PE=2 SV=1 -<br>[NACC2_MOUSE]                          | 10.75 | 1 | 4  | 5  | 12   | 1.358 | 1.180 | 0.830 | 0.986 | 37.85   | 10.75 | 8  | 12   | 586  | 63.2  | 5.90 |
| P62631   | Elongation factor 1-alpha 2 OS=Mus musculus<br>GN=Eef1a2 PE=1 SV=1 -<br>[EF1A2_MOUSE]                                    | 64.79 | 1 | 13 | 25 | 320  | 0.639 | 0.559 | 0.924 | 0.986 | 874.41  | 64.79 | 46 | 320  | 463  | 50.4  | 9.03 |
| A3KFU5   | Protein Pabpc4 OS=Mus musculus<br>GN=Pabpc4 PE=2 SV=1 -<br>[A3KFU5_MOUSE]                                                | 33.44 | 6 | 12 | 20 | 76   | 1.017 | 0.986 | 0.917 | 0.986 | 227.63  | 33.44 | 36 | 76   | 631  | 69.4  | 9.57 |
| Q80X73   | Protein pelota homolog OS=Mus musculus<br>GN=Pelo PE=2 SV=3 -<br>[PELO_MOUSE]                                            | 20.52 | 1 | 7  | 7  | 18   | 0.623 | 0.951 | 0.966 | 0.986 | 41.46   | 20.52 | 10 | 18   | 385  | 43.3  | 5.99 |
| Q61024   | Asparagine synthetase [glutamine-hydrolyzing] OS=Mus musculus<br>GN=Asns PE=2 SV=3 -<br>[ASNS_MOUSE]                     | 39.93 | 4 | 19 | 19 | 70   | 0.636 | 0.991 | 0.835 | 0.986 | 170.86  | 39.93 | 34 | 70   | 561  | 64.2  | 6.58 |
| Q9DBL7   | Bifunctional coenzyme A synthase OS=Mus musculus<br>GN=Coasy PE=1 SV=2 - [COASY_MOUSE]                                   | 30.37 | 1 | 10 | 10 | 34   | 0.693 | 0.659 | 0.790 | 0.986 | 118.92  | 30.37 | 16 | 34   | 563  | 62.0  | 7.11 |
| P59235   | Nucleoporin Nup43 OS=Mus musculus<br>GN=Nup43 PE=2 SV=2 -<br>[NUP43_MOUSE]                                               | 22.37 | 1 | 7  | 7  | 18   | 1.374 | 1.085 | 0.830 | 0.986 | 41.61   | 22.37 | 13 | 18   | 380  | 42.0  | 5.39 |
| Q8BLF1   | Neutral cholesterol ester hydrolase 1 OS=Mus musculus<br>GN=Nceh1 PE=1 SV=1 - [NCEH1_MOUSE]                              | 29.17 | 3 | 12 | 12 | 45   | 0.609 | 0.924 | 1.004 | 0.986 | 117.06  | 29.17 | 20 | 45   | 408  | 45.7  | 7.05 |
| A2AMS3   | Galactose-1-phosphate uridylyltransferase OS=Mus musculus<br>GN=Galt PE=3 SV=1 -<br>[A2AMS3_MOUSE]                       | 17.22 | 3 | 5  | 5  | 19   | 0.800 | 0.829 | 0.941 | 0.986 | 55.92   | 17.22 | 9  | 19   | 360  | 41.2  | 7.03 |
| Q8BGC1   | UPF0489 protein C5orf22 homolog OS=Mus musculus<br>PE=2 SV=1 - [CE022_MOUSE]                                             | 16.06 | 3 | 4  | 4  | 5    | 0.902 | 1.405 | 1.167 | 0.986 | 13.78   | 16.06 | 5  | 5    | 442  | 49.4  | 4.81 |
| Q3UH14   | Protein TMED8 OS=Mus musculus<br>GN=Tmed8 PE=1 SV=1 -<br>[TMED8_MOUSE]                                                   | 31.60 | 1 | 7  | 7  | 22   | 1.306 | 1.147 | 0.903 | 0.986 | 68.62   | 31.60 | 12 | 22   | 326  | 35.8  | 4.74 |
| Q3UBG2-2 | Isoform 2 of PTB-containing, cubilin and LRP1-interacting protein OS=Mus musculus<br>GN=Ptd1 -<br>[PTD1_MOUSE]           | 6.90  | 2 | 1  | 1  | 2    | 1.017 | 1.358 | 0.983 | 0.986 | 8.45    | 6.90  | 2  | 2    | 203  | 23.0  | 6.95 |

|          |                                                                                                         |       |   |    |    |     |       |       |       |       |         |       |     |     |      |       |      |
|----------|---------------------------------------------------------------------------------------------------------|-------|---|----|----|-----|-------|-------|-------|-------|---------|-------|-----|-----|------|-------|------|
| D3Z7P3   | Glutaminase kidney isoform, mitochondrial OS=Mus musculus GN=Gls PE=1 SV=1 - [GLSK_MOUSE]               | 48.66 | 6 | 6  | 30 | 169 | 1.126 | 1.194 | 1.184 | 0.986 | 562.79  | 48.66 | 51  | 169 | 674  | 73.9  | 7.99 |
| Q99LC2   | Cleavage stimulation factor subunit 1 OS=Mus musculus GN=Cstf1 PE=2 SV=1 - [CSTF1_MOUSE]                | 16.01 | 2 | 5  | 5  | 14  | 0.972 | 0.948 | 0.955 | 0.987 | 35.00   | 16.01 | 9   | 14  | 431  | 48.4  | 6.58 |
| Q9EPN1-4 | isoform 4 of Neurobeachin OS=Mus musculus GN=Nbea - [NBEA_MOUSE]                                        | 28.66 | 4 | 62 | 69 | 256 | 0.667 | 1.291 | 1.110 | 0.987 | 781.18  | 28.66 | 114 | 256 | 2931 | 325.9 | 6.20 |
| Q91XL9   | Oxysterol-binding protein-related protein 1 OS=Mus musculus GN=Osbp1a PE=1 SV=2 - [OSBL1_MOUSE]         | 14.63 | 7 | 12 | 14 | 57  | 0.760 | 0.725 | 1.041 | 0.987 | 156.74  | 14.63 | 23  | 57  | 950  | 107.7 | 6.44 |
| Q9R190   | Metastasis-associated protein MTA2 OS=Mus musculus GN=Mta2 PE=1 SV=1 - [MTA2_MOUSE]                     | 22.90 | 1 | 10 | 15 | 46  | 1.068 | 0.955 | 1.025 | 0.987 | 116.62  | 22.90 | 24  | 46  | 668  | 75.0  | 9.67 |
| Q3UFT3   | GRB2-associated and regulator of MAPK protein OS=Mus musculus GN=Garem PE=1 SV=2 - [GAREM_MOUSE]        | 9.02  | 2 | 7  | 7  | 16  | 0.996 | 1.077 | 1.056 | 0.987 | 41.72   | 9.02  | 12  | 16  | 876  | 97.2  | 6.60 |
| Q6NZR5   | Protein Skiv2l OS=Mus musculus GN=Skiv2l PE=2 SV=1 - [Q6NZR5_MOUSE]                                     | 15.11 | 2 | 15 | 16 | 33  | 0.889 | 1.014 | 0.850 | 0.987 | 86.40   | 15.11 | 25  | 33  | 1244 | 137.4 | 6.28 |
| P61148   | Fibroblast growth factor 1 OS=Mus musculus GN=Fgf1 PE=2 SV=1 - [FGF1_MOUSE]                             | 45.81 | 5 | 6  | 6  | 29  | 2.454 | 0.708 | 0.985 | 0.987 | 95.53   | 45.81 | 10  | 29  | 155  | 17.4  | 7.02 |
| Q3V011-3 | isoform 3 of Transmembrane protein 237 OS=Mus musculus GN=Tmem237 -                                     | 13.15 | 3 | 4  | 4  | 6   | 0.668 | 0.640 | 0.933 | 0.987 | 14.38   | 13.15 | 6   | 6   | 403  | 44.6  | 6.48 |
| Q61527-3 | Isoform 3M-A Cyt-2 of Receptor tyrosine-protein kinase erbB-4 OS=Mus musculus GN=ErbB4 - [ERBB4_MOUSE]  | 9.37  | 6 | 8  | 9  | 29  | 1.309 | 1.248 | 1.241 | 0.987 | 71.03   | 9.37  | 14  | 29  | 1292 | 145.2 | 6.39 |
| Q99LG4   | Tetratricopeptide repeat protein 5 OS=Mus musculus GN=Ttc5 PE=1 SV=2 - [TTC5_MOUSE]                     | 9.32  | 1 | 4  | 4  | 12  | 0.821 | 1.034 | 0.862 | 0.987 | 38.87   | 9.32  | 6   | 12  | 440  | 48.8  | 6.29 |
| Q9JKX6   | ADP-sugar pyrophosphatase OS=Mus musculus GN=Nudt5 PE=1 SV=1 - [NUDT5_MOUSE]                            | 29.82 | 2 | 6  | 6  | 19  | 1.652 | 1.050 | 1.012 | 0.987 | 48.00   | 29.82 | 10  | 19  | 218  | 24.0  | 5.48 |
| P82198   | Transforming growth factor-beta-induced protein ig-h3 OS=Mus musculus GN=Tgfb1 PE=2 SV=1 - [BGH3_MOUSE] | 4.83  | 1 | 3  | 3  | 5   | 1.691 | 3.119 | 0.808 | 0.987 | 11.95   | 4.83  | 5   | 5   | 683  | 74.5  | 7.06 |
| Q5SW88   | Ras-related protein Rab-1A OS=Mus musculus GN=Rab1 PE=2 SV=1 - [Q5SW88_MOUSE]                           | 87.13 | 4 | 9  | 18 | 197 | 0.688 | 1.022 | 0.939 | 0.987 | 538.18  | 87.13 | 33  | 197 | 202  | 22.4  | 6.21 |
| Q9CY73   | 39S ribosomal protein L44, mitochondrial OS=Mus musculus GN=Nirp44 PE=1 SV=3 - [RM44_MOUSE]             | 15.62 | 2 | 4  | 4  | 19  | 1.170 | 0.892 | 0.863 | 0.987 | 56.29   | 15.62 | 7   | 19  | 333  | 37.5  | 8.51 |
| P13439   | Uridine 5'-monophosphate synthase OS=Mus musculus GN=Umps PE=2 SV=3 - [UMPS_MOUSE]                      | 33.06 | 2 | 14 | 14 | 33  | 0.887 | 1.030 | 0.896 | 0.987 | 92.72   | 33.06 | 25  | 33  | 481  | 52.3  | 6.61 |
| Q400C8   | Archaemetzincin-2 OS=Mus musculus GN=Amz2 PE=2 SV=1 - [AMZ2_MOUSE]                                      | 9.47  | 4 | 3  | 3  | 7   | 0.978 | 1.343 | 1.022 | 0.987 | 19.60   | 9.47  | 5   | 7   | 359  | 41.3  | 7.66 |
| Q6IRU5   | Clathrin light chain B OS=Mus musculus GN=Cltb PE=2 SV=1 - [CLCB_MOUSE]                                 | 37.99 | 3 | 1  | 11 | 223 | 2.066 | 2.687 | 1.135 | 0.987 | 573.62  | 37.99 | 19  | 223 | 229  | 25.2  | 4.63 |
| Q5SSZ5   | Tensin-3 OS=Mus musculus GN=Tns3 PE=1 SV=1 - [TENS3_MOUSE]                                              | 11.32 | 2 | 10 | 13 | 42  | 1.372 | 0.909 | 0.979 | 0.987 | 133.85  | 11.32 | 22  | 42  | 1440 | 155.5 | 6.65 |
| E9Q1F5   | Protein Myo5c OS=Mus musculus GN=Myo5c PE=2 SV=1 - [E9Q1F5_MOUSE]                                       | 6.54  | 2 | 1  | 11 | 39  | 2.104 | 1.498 | 1.433 | 0.988 | 101.46  | 6.54  | 17  | 39  | 1742 | 202.6 | 7.59 |
| Q9DBJ1   | Phosphoglycerate mutase 1 OS=Mus musculus GN=Pgam1 PE=1 SV=3 - [PGAM1_MOUSE]                            | 80.31 | 1 | 13 | 17 | 944 | 1.632 | 1.127 | 0.848 | 0.988 | 2899.82 | 80.31 | 33  | 944 | 254  | 28.8  | 7.18 |
| Q8BRH4   | Histone-lysine N-methyltransferase 2C OS=Mus musculus GN=Kmt2c PE=2 SV=2 -                              | 1.16  | 7 | 3  | 5  | 5   | 1.179 | 0.957 | 1.086 | 0.988 | 10.78   | 1.16  | 5   | 5   | 4903 | 539.8 | 6.55 |
| Q7TT37   | Elongator complex protein 1 OS=Mus musculus GN=Ikbkap PE=2 SV=2 - [ELP1_MOUSE]                          | 18.60 | 1 | 20 | 20 | 75  | 0.591 | 0.893 | 0.819 | 0.988 | 215.98  | 18.60 | 38  | 75  | 1333 | 149.5 | 6.00 |
| E9Q2E4   | Protein Gm15800 OS=Mus musculus GN=Gm15800 PE=2 SV=2 - [E9Q2E4_MOUSE]                                   | 17.75 | 6 | 62 | 66 | 171 | 0.645 | 0.779 | 0.975 | 0.988 | 480.80  | 17.75 | 108 | 171 | 4418 | 483.8 | 6.06 |
| B8Q135   | Liprin-alpha 3 OS=Mus musculus GN=Ppfa3 PE=2 SV=1 - [B8Q135_MOUSE]                                      | 50.17 | 5 | 43 | 53 | 253 | 0.816 | 1.296 | 1.355 | 0.988 | 793.52  | 50.17 | 92  | 253 | 1194 | 133.3 | 5.64 |
| F6R5X6   | Bicaudal D-related protein 1 (Fragment) OS=Mus musculus GN=Ccdc64 PE=2 SV=1 - [F6R5X6_MOUSE]            | 3.64  | 1 | 1  | 1  | 2   | 4.666 | 1.316 | 2.138 | 0.988 | 2.73    | 3.64  | 1   | 2   | 302  | 34.6  | 4.75 |

|          |                                                                                                                                  |       |   |    |    |     |       |       |       |       |        |       |    |     |      |       |      |
|----------|----------------------------------------------------------------------------------------------------------------------------------|-------|---|----|----|-----|-------|-------|-------|-------|--------|-------|----|-----|------|-------|------|
| Q7M6W1   | RTN1-C OS=Mus musculus<br>GN=Rtn1 PE=2 SV=1 -<br>[Q7M6W1_MOUSE]                                                                  | 47.60 | 2 | 2  | 9  | 51  | 0.501 | 1.146 | 0.736 | 0.988 | 153.67 | 47.60 | 17 | 51  | 208  | 23.5  | 8.91 |
| Q9CVB6   | Actin-related protein 2/3<br>complex subunit 2<br>OS=Mus musculus<br>GN=Arpc2 PE=1 SV=3 -<br>[ARPC2_MOUSE]                       | 56.67 | 2 | 19 | 19 | 121 | 0.573 | 1.308 | 1.065 | 0.988 | 338.82 | 56.67 | 36 | 121 | 300  | 34.3  | 7.36 |
| Q8BKC8-2 | Isoform 2 of<br>Phosphatidylinositol 4-<br>kinase beta OS=Mus<br>musculus GN=P4kb -                                              | 11.36 | 5 | 7  | 7  | 14  | 0.722 | 0.888 | 0.851 | 0.988 | 41.70  | 11.36 | 12 | 14  | 801  | 89.9  | 6.51 |
| Q8VE52   | Opioid growth factor<br>receptor-like protein 1<br>OS=Mus musculus<br>GN=Ogfr1 PE=2 SV=2 -<br>[OGRL1_MOUSE]                      | 12.07 | 1 | 5  | 5  | 12  | 0.847 | 1.328 | 1.126 | 0.988 | 26.93  | 12.07 | 9  | 12  | 464  | 52.2  | 6.57 |
| Q8BVA2   | Transmembrane protein<br>222 OS=Mus musculus<br>GN=Tmem222 PE=2 SV=1 -<br>[TM222_MOUSE]                                          | 28.85 | 3 | 3  | 3  | 18  | 0.534 | 0.997 | 0.949 | 0.988 | 55.06  | 28.85 | 6  | 18  | 208  | 23.2  | 6.61 |
| Q9JKK0   | Calcipressin-3 OS=Mus<br>musculus GN=Rcan3 PE=1<br>SV=1 - [RCAN3_MOUSE]                                                          | 20.08 | 4 | 3  | 4  | 8   | 0.954 | 0.852 | 0.897 | 0.988 | 27.54  | 20.08 | 7  | 8   | 239  | 27.1  | 4.74 |
| P97471   | Mothers against<br>decapentaplegic homolog<br>4 OS=Mus musculus<br>GN=Smad4 PE=1 SV=2 -<br>[SMAD4_MOUSE]                         | 15.61 | 1 | 8  | 8  | 12  | 0.983 | 1.336 | 0.937 | 0.988 | 34.52  | 15.61 | 11 | 12  | 551  | 60.3  | 6.99 |
| Q8BH56   | Armadillo repeat-<br>containing X-linked protein<br>3 OS=Mus musculus<br>GN=Armc3 PE=1 SV=1 -<br>[ARMX3_MOUSE]                   | 21.90 | 1 | 6  | 6  | 19  | 0.842 | 1.100 | 0.963 | 0.988 | 35.02  | 21.90 | 10 | 19  | 379  | 42.6  | 8.68 |
| E9Q1W7   | TBC domain-containing<br>protein kinase-like protein<br>OS=Mus musculus<br>GN=Tbck PE=2 SV=1 -<br>[E9Q1W7_MOUSE]                 | 18.03 | 3 | 12 | 13 | 35  | 0.599 | 0.935 | 0.894 | 0.988 | 104.68 | 18.03 | 23 | 35  | 893  | 100.6 | 6.43 |
| D3YZU1   | SH3 and multiple ankyrin<br>repeat domains protein 1<br>OS=Mus musculus<br>GN=Shank1 PE=2 SV=1 -<br>[SHAN1_MOUSE]                | 30.32 | 3 | 44 | 46 | 198 | 0.896 | 1.256 | 1.548 | 0.988 | 606.66 | 30.32 | 79 | 198 | 2167 | 226.2 | 8.34 |
| Q9CWK8   | Sorting nexin-2 OS=Mus<br>musculus GN=Snx2 PE=1<br>SV=2 - [SNX2_MOUSE]                                                           | 43.55 | 1 | 20 | 22 | 91  | 0.882 | 1.145 | 0.888 | 0.988 | 285.82 | 43.55 | 41 | 91  | 519  | 58.4  | 5.12 |
| Q5NCM9   | B9 domain-containing<br>protein 1 (Fragment)<br>OS=Mus musculus<br>GN=B9d1 PE=2 SV=1 -<br>[Q5NCM9_MOUSE]                         | 31.36 | 2 | 2  | 2  | 2   | 1.845 | 1.126 | 1.015 | 0.989 | 0.00   | 31.36 | 2  | 2   | 118  | 13.2  | 9.64 |
| Q924B0   | Inositol (Myo)-1(Or 4)-<br>monophosphatase 1<br>OS=Mus musculus<br>GN=Impa1 PE=2 SV=1 -<br>[Q924B0_MOUSE]                        | 56.32 | 4 | 14 | 14 | 98  | 1.009 | 0.871 | 0.961 | 0.989 | 240.86 | 56.32 | 27 | 98  | 277  | 30.4  | 5.19 |
| Q9ERR1-2 | Isoform 2 of Nuclear<br>distribution protein nudE-<br>like 1 OS=Mus musculus<br>GN=Ndel1 -<br>[NDEL1_MOUSE]                      | 50.48 | 2 | 13 | 16 | 54  | 1.141 | 1.018 | 1.243 | 0.989 | 169.52 | 50.48 | 29 | 54  | 315  | 35.5  | 5.22 |
| Q8BHR8   | UPF0705 protein C11orf49<br>homolog OS=Mus<br>musculus PE=2 SV=1 -<br>[CK049_MOUSE]                                              | 18.13 | 3 | 4  | 4  | 11  | 0.920 | 1.056 | 0.927 | 0.989 | 37.75  | 18.13 | 8  | 11  | 331  | 37.5  | 5.41 |
| Q7TPV4   | Myb-binding protein 1A<br>OS=Mus musculus<br>GN=Mybbp1a PE=1 SV=2 -<br>[MBB1A_MOUSE]                                             | 22.77 | 1 | 23 | 23 | 69  | 0.586 | 0.722 | 0.766 | 0.989 | 197.27 | 22.77 | 37 | 69  | 1344 | 151.9 | 8.95 |
| Q8C569-2 | Isoform 2 of Protein<br>FAM118B OS=Mus<br>musculus GN=Fam118b -<br>[F118B_MOUSE]                                                 | 5.82  | 2 | 1  | 1  | 1   | 0.727 | 1.291 | 1.108 | 0.989 | 4.45   | 5.82  | 1  | 1   | 275  | 30.8  | 8.57 |
| A2AR50-2 | Isoform 2 of Ras-specific<br>guanine nucleotide-<br>releasing factor RalGPS1<br>OS=Mus musculus<br>GN=Ralgps1 -<br>[RANR1_MOUSE] | 6.04  | 4 | 3  | 3  | 4   | 0.851 | 0.971 | 0.866 | 0.989 | 11.02  | 6.04  | 3  | 4   | 497  | 55.9  | 9.64 |
| Q5SSW2   | Proteasome activator<br>complex subunit 4<br>OS=Mus musculus<br>GN=Psme4 PE=1 SV=1 -<br>[PSME4_MOUSE]                            | 5.43  | 2 | 6  | 8  | 12  | 0.833 | 0.857 | 0.895 | 0.989 | 31.93  | 5.43  | 9  | 12  | 1843 | 211.1 | 7.01 |
| Q8VE38   | Oxidoreductase NAD-<br>binding domain-containing<br>protein 1 OS=Mus<br>musculus GN=Oxnad1<br>PE=2 SV=2 -<br>[OXNAD1_MOUSE]      | 14.47 | 6 | 4  | 5  | 8   | 1.191 | 0.677 | 0.900 | 0.989 | 20.10  | 14.47 | 8  | 8   | 311  | 34.7  | 8.13 |
| P42227-2 | Isoform 2 of Signal<br>transducer and activator of<br>transcription 3 OS=Mus<br>musculus GN=Stat3 -<br>[STAT3_MOUSE]             | 21.05 | 4 | 11 | 12 | 30  | 0.789 | 1.169 | 0.707 | 0.989 | 98.16  | 21.05 | 19 | 30  | 722  | 83.1  | 7.12 |
| Q3TQ82   | FAD-dependent<br>oxidoreductase domain-<br>containing protein 1<br>OS=Mus musculus<br>GN=Foxred1 PE=2 SV=1 -<br>[FOXRED1_MOUSE]  | 8.42  | 4 | 4  | 4  | 8   | 0.811 | 0.848 | 0.879 | 0.989 | 25.93  | 8.42  | 6  | 8   | 487  | 54.1  | 7.53 |
| Q8BYI4   | Tetratricopeptide repeat<br>protein 39B OS=Mus<br>musculus GN=Ttc39b<br>PE=1 SV=1 -                                              | 12.48 | 5 | 7  | 7  | 14  | 0.693 | 0.827 | 0.899 | 0.989 | 41.82  | 12.48 | 12 | 14  | 617  | 70.2  | 6.64 |

|          |                                                                                                                     |       |   |    |     |      |        |       |       |       |         |       |     |      |      |       |       |
|----------|---------------------------------------------------------------------------------------------------------------------|-------|---|----|-----|------|--------|-------|-------|-------|---------|-------|-----|------|------|-------|-------|
| A2AA86   | SUZ domain-containing protein 1 OS=Mus musculus GN=Szrd1 PE=2 SV=1 - [A2AA86_MOUSE]                                 | 17.42 | 4 | 2  | 2   | 14   | 2.288  | 0.691 | 1.065 | 0.989 | 50.31   | 17.42 | 4   | 14   | 132  | 14.6  | 11.46 |
| Q924D1   | Cytochrome P450 CYP2J9 OS=Mus musculus GN=Cyp2j9 PE=2 SV=1 - [Q924D1_MOUSE]                                         | 20.52 | 3 | 5  | 8   | 32   | 0.906  | 0.688 | 0.794 | 0.989 | 101.57  | 20.52 | 14  | 32   | 502  | 57.9  | 7.75  |
| P51906   | Excitatory amino acid transporter 3 OS=Mus musculus GN=Slc1a1 PE=1 SV=2 -                                           | 7.07  | 1 | 3  | 3   | 10   | 21.994 | 1.216 | 1.082 | 0.990 | 19.83   | 7.07  | 5   | 10   | 523  | 56.7  | 6.11  |
| Q9D1H7   | Golgi to ER traffic protein 4 homolog OS=Mus musculus GN=Get4 PE=2 SV=2 - [GET4_MOUSE]                              | 18.65 | 4 | 6  | 7   | 17   | 0.794  | 0.952 | 1.018 | 0.990 | 36.17   | 18.65 | 11  | 17   | 327  | 36.5  | 5.41  |
| P59108   | Copine-2 OS=Mus musculus GN=Cpne2 PE=2 SV=1 - [CPNE2_MOUSE]                                                         | 19.89 | 1 | 8  | 9   | 64   | 0.843  | 1.438 | 0.865 | 0.990 | 183.01  | 19.89 | 17  | 64   | 548  | 61.0  | 5.96  |
| P19536   | Cytochrome c oxidase subunit 5B, mitochondrial OS=Mus musculus GN=Cox5b PE=1 SV=1 - [COX5B_MOUSE]                   | 58.59 | 2 | 8  | 8   | 180  | 1.600  | 1.047 | 1.297 | 0.990 | 466.17  | 58.59 | 16  | 180  | 128  | 13.8  | 8.38  |
| QSSUW3   | Growth factor receptor-bound protein 10 OS=Mus musculus GN=Grb10 PE=2 SV=1 - [QSSUW3_MOUSE]                         | 12.73 | 5 | 6  | 6   | 17   | 0.757  | 0.649 | 0.658 | 0.990 | 49.68   | 12.73 | 9   | 17   | 550  | 62.2  | 8.47  |
| Q924M7   | Mannose-6-phosphate isomerase OS=Mus musculus GN=Mpi PE=2 SV=1 - [MPI_MOUSE]                                        | 39.24 | 2 | 13 | 13  | 44   | 0.858  | 1.083 | 1.032 | 0.990 | 148.99  | 39.24 | 19  | 44   | 423  | 46.5  | 5.95  |
| P98191   | Phosphatidate cytidyltransferase 1 OS=Mus musculus GN=Cds1 PE=1 SV=2 -                                              | 8.03  | 1 | 4  | 4   | 12   | 0.687  | 0.584 | 0.929 | 0.990 | 34.94   | 8.03  | 7   | 12   | 461  | 52.8  | 7.72  |
| Q922D4-2 | Isoform 2 of Serine/threonine-protein phosphatase 6 regulatory subunit 3 OS=Mus musculus GN=Ppp6r3 - [Ppp6r3_MOUSE] | 30.11 | 5 | 20 | 21  | 68   | 1.120  | 1.257 | 1.014 | 0.990 | 204.92  | 30.11 | 34  | 68   | 827  | 92.6  | 4.59  |
| O55098   | Serine/threonine-protein kinase 10 OS=Mus musculus GN=Stk10 PE=1 SV=2 - [STK10_MOUSE]                               | 3.52  | 1 | 2  | 3   | 4    | 0.750  | 1.396 | 0.857 | 0.990 | 5.08    | 3.52  | 3   | 4    | 966  | 111.8 | 7.15  |
| Q8BWG8-2 | Isoform 1B of Beta-arrestin-1 OS=Mus musculus GN=Arrb1 - [ARRB1_MOUSE]                                              | 28.78 | 7 | 11 | 12  | 49   | 0.691  | 1.083 | 1.009 | 0.990 | 136.02  | 28.78 | 21  | 49   | 410  | 46.2  | 6.42  |
| Q9CXT7-2 | Isoform 2 of Transmembrane protein 192 OS=Mus musculus GN=Tmem192 -                                                 | 14.93 | 2 | 3  | 3   | 6    | 1.392  | 1.146 | 0.912 | 0.990 | 11.26   | 14.93 | 6   | 6    | 221  | 25.4  | 9.14  |
| Q3TH13   | Probable RNA-binding protein EIF1AD OS=Mus musculus GN=Ef1ad PE=2 SV=2 - [EIF1A_MOUSE]                              | 21.76 | 1 | 3  | 3   | 4    | 1.779  | 1.316 | 1.478 | 0.990 | 11.61   | 21.76 | 4   | 4    | 170  | 19.5  | 4.87  |
| Q7TQ95   | Protein lunapark OS=Mus musculus GN=Lnp PE=1 SV=1 - [LNP_MOUSE]                                                     | 41.18 | 5 | 14 | 14  | 71   | 0.984  | 1.006 | 0.956 | 0.990 | 220.50  | 41.18 | 25  | 71   | 425  | 47.5  | 5.27  |
| Q91VC7   | Protein phosphatase 1 regulatory subunit 14A OS=Mus musculus GN=Ppp1r14a PE=2 SV=1 - [PP14A_MOUSE]                  | 43.54 | 1 | 6  | 6   | 36   | 1.501  | 0.369 | 1.236 | 0.990 | 96.89   | 43.54 | 11  | 36   | 147  | 16.6  | 7.34  |
| P27038   | Activin receptor type-2A OS=Mus musculus GN=Acvr2a PE=1 SV=1 - [AVR2A_MOUSE]                                        | 2.14  | 1 | 1  | 1   | 1    | 1.426  | 0.894 | 0.989 | 0.990 | 0.00    | 2.14  | 1   | 1    | 513  | 57.9  | 5.92  |
| D3Z118   | Islet cell autoantigen 1 OS=Mus musculus GN=Ica1 PE=2 SV=1 - [D3Z118_MOUSE]                                         | 20.65 | 8 | 9  | 10  | 33   | 0.680  | 1.205 | 0.957 | 0.990 | 93.65   | 20.65 | 18  | 33   | 465  | 52.9  | 6.20  |
| Q6PDY0   | Coiled-coil domain-containing protein 85B OS=Mus musculus GN=Ccdc85b PE=1 SV=1 - [CC85B_MOUSE]                      | 32.67 | 1 | 4  | 6   | 13   | 0.950  | 1.025 | 1.056 | 0.990 | 23.36   | 32.67 | 8   | 13   | 202  | 22.1  | 5.08  |
| Q6Z261   | Spectrin beta chain, non-erythrocytic 1 OS=Mus musculus GN=Sptbn1 PE=1 SV=2 - [SPTB2_MOUSE]                         | 73.55 | 1 | 13 | 163 | 2161 | 0.956  | 0.721 | 1.438 | 0.990 | 6100.33 | 73.55 | 298 | 2161 | 2363 | 274.1 | 5.58  |
| AZADB1   | Mx2-interacting protein OS=Mus musculus GN=Spen PE=2 SV=1 - [AZADB1_MOUSE]                                          | 3.48  | 5 | 8  | 8   | 13   | 1.174  | 1.218 | 1.018 | 0.990 | 26.20   | 3.48  | 11  | 13   | 3620 | 395.7 | 8.56  |
| P17439   | Glucosylceramidase OS=Mus musculus GN=Cba PE=1 SV=1 - [GLCM_MOUSE]                                                  | 7.38  | 1 | 4  | 4   | 11   | 0.827  | 0.740 | 0.805 | 0.990 | 32.27   | 7.38  | 7   | 11   | 515  | 57.6  | 7.75  |
| P61759   | Prefoldin subunit 3 OS=Mus musculus GN=Ydp1 PE=2 SV=2 - [PFD3_MOUSE]                                                | 67.35 | 2 | 14 | 15  | 65   | 1.578  | 0.792 | 1.196 | 0.990 | 187.29  | 67.35 | 23  | 65   | 196  | 22.4  | 6.28  |
| G3X918   | RAS p21 protein activator 2 OS=Mus musculus GN=Rasa2 PE=4 SV=1 - [G3X918_MOUSE]                                     | 6.14  | 3 | 3  | 6   | 12   | 0.868  | 1.106 | 0.966 | 0.990 | 28.53   | 6.14  | 11  | 12   | 847  | 96.3  | 7.59  |
| Q9D115   | Methylmalonyl-CoA epimerase, mitochondrial OS=Mus musculus GN=Mcee PE=2 SV=1 - [MCEE_MOUSE]                         | 44.38 | 1 | 4  | 5   | 11   | 1.319  | 1.094 | 1.440 | 0.990 | 42.62   | 44.38 | 7   | 11   | 178  | 19.0  | 9.09  |

|          |                                                                                                                            |       |   |    |    |     |       |       |       |       |         |       |    |     |      |       |       |
|----------|----------------------------------------------------------------------------------------------------------------------------|-------|---|----|----|-----|-------|-------|-------|-------|---------|-------|----|-----|------|-------|-------|
| Q9J118   | Low-density lipoprotein receptor-related protein 1B<br>OS=Mus musculus<br>GN=Lrp1b PE=2 SV=1 - [LRP1B_MOUSE]               | 6.00  | 4 | 23 | 27 | 57  | 1.378 | 1.273 | 1.144 | 0.991 | 150.46  | 6.00  | 41 | 57  | 4599 | 513.3 | 5.39  |
| Q52KF7   | Disks large homolog 3<br>OS=Mus musculus<br>GN=Dlg3 PE=2 SV=1 - [Q52KF7_MOUSE]                                             | 53.98 | 3 | 32 | 34 | 217 | 0.866 | 1.503 | 1.354 | 0.991 | 670.04  | 53.98 | 62 | 217 | 817  | 90.3  | 7.03  |
| Q77QF7   | Amphiphysin OS=Mus musculus<br>GN=Amph PE=1 SV=1 - [AMPH_MOUSE]                                                            | 43.44 | 1 | 26 | 28 | 397 | 1.256 | 1.694 | 1.493 | 0.991 | 1121.55 | 43.44 | 49 | 397 | 686  | 75.0  | 4.63  |
| O55128   | Histone deacetylase complex subunit SAP18<br>OS=Mus musculus<br>GN=Sap18 PE=1 SV=1 - [SAP18_MOUSE]                         | 38.56 | 5 | 6  | 6  | 38  | 1.016 | 0.854 | 0.853 | 0.991 | 85.40   | 38.56 | 11 | 38  | 153  | 17.6  | 9.35  |
| A2A388-2 | Isoform 2 of Patatin-like phospholipase domain-containing protein 7<br>OS=Mus musculus<br>GN=Ptp47 - [Ptp47_MOUSE]         | 4.15  | 4 | 4  | 5  | 8   | 0.438 | 0.918 | 0.805 | 0.991 | 10.37   | 4.15  | 7  | 8   | 1326 | 147.5 | 7.44  |
| P25785   | Metalloproteinase inhibitor 2<br>OS=Mus musculus<br>GN=Timp2 PE=1 SV=2 - [TIMP2_MOUSE]                                     | 48.64 | 3 | 11 | 11 | 28  | 2.320 | 1.260 | 0.824 | 0.991 | 81.08   | 48.64 | 14 | 28  | 220  | 24.3  | 7.49  |
| Q810L4   | Transmembrane protein 39B<br>OS=Mus musculus<br>GN=Tmem39b PE=1 SV=1 - [TM39B_MOUSE]                                       | 2.03  | 1 | 1  | 1  | 2   | 1.245 | 1.006 | 1.022 | 0.991 | 5.01    | 2.03  | 2  | 2   | 492  | 56.3  | 9.45  |
| Q01338   | Alpha-2A adrenergic receptor<br>OS=Mus musculus<br>GN=Adra2a PE=1 SV=1 -                                                   | 17.78 | 2 | 7  | 7  | 27  | 1.450 | 0.999 | 0.846 | 0.991 | 75.25   | 17.78 | 11 | 27  | 450  | 48.8  | 9.69  |
| Q9W7Q5   | A-kinase anchor protein 12<br>OS=Mus musculus<br>GN=Akap12 PE=1 SV=1 - [AKA12_MOUSE]                                       | 30.82 | 2 | 35 | 35 | 154 | 1.639 | 0.626 | 0.990 | 0.991 | 483.15  | 30.82 | 59 | 154 | 1684 | 180.6 | 4.44  |
| Q99L85   | Elongator complex protein 5<br>OS=Mus musculus<br>GN=Elp5 PE=2 SV=1 - [ELP5_MOUSE]                                         | 25.33 | 5 | 6  | 6  | 18  | 0.733 | 1.138 | 0.871 | 0.991 | 59.22   | 25.33 | 10 | 18  | 300  | 33.5  | 5.49  |
| Q9CXD6   | Mitochondrial calcium uniporter regulator 1<br>OS=Mus musculus<br>GN=Mcur1 PE=2 SV=1 - [MCUR1_MOUSE]                       | 10.88 | 3 | 3  | 5  | 7   | 1.171 | 1.571 | 0.822 | 0.991 | 12.42   | 10.88 | 6  | 7   | 340  | 37.8  | 10.20 |
| P55284   | Cadherin-5 OS=Mus musculus<br>GN=Cdhs PE=1 SV=2 - [CADHS_MOUSE]                                                            | 20.03 | 1 | 13 | 13 | 36  | 1.457 | 1.991 | 0.973 | 0.991 | 111.96  | 20.03 | 20 | 36  | 784  | 87.8  | 5.30  |
| Q6P1H6-2 | Isoform 2 of Ankyrin repeat and LEM domain-containing protein 2<br>OS=Mus musculus<br>GN=Ankle2 - [ANKL2_MOUSE]            | 18.38 | 4 | 17 | 17 | 28  | 1.198 | 1.203 | 1.042 | 0.991 | 72.59   | 18.38 | 23 | 28  | 963  | 106.1 | 7.37  |
| Q6PD26   | GPI transamidase component PIG-5 OS=Mus musculus<br>GN=Pigs PE=1 SV=3 - [PIGS_MOUSE]                                       | 27.93 | 1 | 10 | 10 | 24  | 0.624 | 0.835 | 0.759 | 0.992 | 73.34   | 27.93 | 17 | 24  | 555  | 61.7  | 6.93  |
| Q8K2P6   | Rieske domain-containing protein OS=Mus musculus<br>GN=Rfescd PE=1 SV=1 - [RFESD_MOUSE]                                    | 41.40 | 2 | 6  | 6  | 17  | 2.444 | 1.185 | 0.997 | 0.992 | 34.90   | 41.40 | 9  | 17  | 157  | 18.0  | 6.86  |
| Q91YY2   | Beta-1,4-galactosyltransferase 3<br>OS=Mus musculus<br>GN=B4gal3 PE=1 SV=1 -                                               | 4.30  | 1 | 2  | 2  | 3   | 1.121 | 0.983 | 0.973 | 0.992 | 3.93    | 4.30  | 2  | 3   | 395  | 44.1  | 9.25  |
| Q9Z2A5   | Arginyl-tRNA-protein transferase 1 OS=Mus musculus<br>GN=Ate1 PE=1 SV=2 - [ATE1_MOUSE]                                     | 28.29 | 4 | 10 | 11 | 30  | 1.155 | 1.054 | 0.834 | 0.992 | 80.28   | 28.29 | 16 | 30  | 516  | 59.1  | 8.19  |
| P35550   | rRNA 2'-O-methyltransferase fibrillar OS=Mus musculus<br>GN=Fbl PE=1 SV=2 - [FBL_MOUSE]                                    | 33.64 | 1 | 7  | 9  | 55  | 0.658 | 0.643 | 0.781 | 0.992 | 122.08  | 33.64 | 18 | 55  | 327  | 34.3  | 10.24 |
| Q9D7H3   | RNA 3'-terminal phosphate cyclase OS=Mus musculus<br>GN=RtcA PE=2 SV=2 - [RTCA_MOUSE]                                      | 43.72 | 4 | 12 | 12 | 43  | 0.749 | 0.903 | 0.829 | 0.992 | 107.91  | 43.72 | 20 | 43  | 366  | 39.2  | 7.90  |
| P70335-2 | Isoform 2 of Rho-associated protein kinase 1<br>OS=Mus musculus<br>GN=Rock1 -                                              | 23.73 | 2 | 23 | 32 | 92  | 1.252 | 0.802 | 1.060 | 0.992 | 215.30  | 23.73 | 54 | 92  | 1353 | 157.9 | 5.86  |
| O88895   | Histone deacetylase 3<br>OS=Mus musculus<br>GN=Hdac3 PE=1 SV=1 - [HDAC3_MOUSE]                                             | 8.96  | 3 | 3  | 4  | 11  | 0.558 | 0.794 | 0.964 | 0.992 | 29.35   | 8.96  | 7  | 11  | 424  | 48.3  | 5.26  |
| Q9WVE8   | Protein kinase C and casein kinase substrate in neurons protein 2 OS=Mus musculus<br>GN=Pacsin2 PE=1 SV=1 - [PACSN2_MOUSE] | 24.07 | 1 | 11 | 12 | 61  | 1.511 | 1.159 | 1.260 | 0.992 | 168.72  | 24.07 | 23 | 61  | 486  | 55.8  | 5.20  |
| O70372   | Telomerase reverse transcriptase OS=Mus musculus<br>GN=Tert PE=1 SV=1 - [TERT_MOUSE]                                       | 1.78  | 1 | 1  | 2  | 6   | 1.895 | 1.307 | 1.233 | 0.992 | 14.12   | 1.78  | 3  | 6   | 1122 | 127.9 | 9.91  |
| O35316   | Sodium- and chloride-dependent taurine transporter OS=Mus musculus<br>GN=Slc6a6 PE=1 SV=2 - [SLC6A6_MOUSE]                 | 4.03  | 1 | 1  | 3  | 27  | 0.646 | 1.148 | 1.003 | 0.992 | 72.31   | 4.03  | 6  | 27  | 621  | 69.8  | 7.23  |
| Q8K4T3   | STE20-related kinase adapter protein beta OS=Mus musculus<br>GN=Strab PE=2 SV=1 - [STRAB_MOUSE]                            | 11.24 | 1 | 3  | 3  | 9   | 0.983 | 1.134 | 0.986 | 0.992 | 29.28   | 11.24 | 5  | 9   | 418  | 46.8  | 6.90  |

|          |                                                                                                                 |       |   |    |    |     |       |       |       |       |        |       |     |     |      |       |      |
|----------|-----------------------------------------------------------------------------------------------------------------|-------|---|----|----|-----|-------|-------|-------|-------|--------|-------|-----|-----|------|-------|------|
| A2A6Q5   | Cell division cycle protein 27 homolog OS=Mus musculus GN=Cdc27 PE=1 SV=1 - [CDC27_MOUSE]                       | 6.55  | 4 | 5  | 5  | 12  | 0.834 | 0.810 | 1.027 | 0.992 | 25.90  | 6.55  | 10  | 12  | 825  | 91.8  | 7.02 |
| Q61526   | Receptor tyrosine-protein kinase erbB-3 OS=Mus musculus GN=ErbB3 PE=1 SV=2 - [ERBB3_MOUSE]                      | 1.34  | 1 | 1  | 1  | 4   | 1.694 | 0.975 | 1.146 | 0.992 | 15.46  | 1.34  | 2   | 4   | 1339 | 147.5 | 6.55 |
| Q9D0W5   | Peptidyl-prolyl cis-trans isomerase-like 1 OS=Mus musculus GN=Ppil1 PE=2 SV=1 - [PP1L1_MOUSE]                   | 33.73 | 1 | 6  | 6  | 28  | 0.807 | 0.925 | 0.947 | 0.992 | 68.18  | 33.73 | 10  | 28  | 166  | 18.2  | 7.99 |
| Q8BML9   | Glutaminyl-tRNA synthetase OS=Mus musculus GN=Qars PE=2 SV=1 - [Q8BML9_MOUSE]                                   | 36.90 | 4 | 24 | 25 | 85  | 0.915 | 1.031 | 0.897 | 0.992 | 269.26 | 36.90 | 44  | 85  | 775  | 87.6  | 7.31 |
| Q9CYN2   | Signal peptidase complex subunit 2 OS=Mus musculus GN=Spcc52 PE=2 SV=1 - [SPCS2_MOUSE]                          | 38.50 | 1 | 7  | 7  | 22  | 1.099 | 1.199 | 0.802 | 0.992 | 86.14  | 38.50 | 10  | 22  | 226  | 25.0  | 8.57 |
| D3Y442   | Protein YF1B OS=Mus musculus GN=Yf1b PE=2 SV=1 - [D3Y442_MOUSE]                                                 | 19.92 | 4 | 3  | 3  | 5   | 0.380 | 1.054 | 0.894 | 0.992 | 17.74  | 19.92 | 4   | 5   | 251  | 27.5  | 9.47 |
| Q8K2D3   | Enhancer of mRNA-decapping protein 3 OS=Mus musculus GN=Edc3 PE=2 SV=1 - [EDC3_MOUSE]                           | 36.02 | 3 | 15 | 15 | 44  | 0.993 | 0.892 | 0.991 | 0.992 | 109.33 | 36.02 | 27  | 44  | 508  | 55.9  | 7.09 |
| D3Z7Q2   | Uncharacterized protein OS=Mus musculus GN=Smm20 PE=2 SV=1 - [D3Z7Q2_MOUSE]                                     | 40.58 | 1 | 3  | 3  | 11  | 0.971 | 0.749 | 1.005 | 0.992 | 29.62  | 40.58 | 5   | 11  | 69   | 7.8   | 9.70 |
| Q3UUG6-2 | Isoform 2 of TBC1 domain family member 24 OS=Mus musculus GN=Tbc1d24 -                                          | 30.99 | 2 | 14 | 14 | 49  | 0.685 | 1.024 | 0.956 | 0.992 | 130.27 | 30.99 | 24  | 49  | 555  | 62.6  | 7.11 |
| Q8C0V0   | Serine/threonine-protein kinase tousled-like 1 OS=Mus musculus GN=Tlk1 PE=2 SV=2 - [TLK1_MOUSE]                 | 8.88  | 6 | 2  | 6  | 12  | 1.532 | 1.013 | 1.169 | 0.992 | 32.41  | 8.88  | 10  | 12  | 766  | 86.6  | 8.79 |
| G3UWD8   | RING finger and CHY zinc finger domain-containing protein 1 OS=Mus musculus GN=Rchy1 PE=4 SV=1 - [RCHY1_MOUSE]  | 11.76 | 2 | 3  | 3  | 6   | 1.743 | 0.894 | 1.306 | 0.992 | 14.34  | 11.76 | 5   | 6   | 221  | 25.2  | 7.30 |
| F6XC25   | Coiled-coil and C2 domain-containing protein 1B (Fragment) OS=Mus musculus GN=Cc2d1b PE=4 SV=1 - [CC2D1B_MOUSE] | 20.00 | 3 | 15 | 15 | 34  | 1.738 | 0.675 | 1.008 | 0.992 | 98.25  | 20.00 | 25  | 34  | 770  | 85.0  | 5.87 |
| Q9D6Z1   | Nucleolar protein 56 OS=Mus musculus GN=Nop56 PE=1 SV=2 - [NOP56_MOUSE]                                         | 33.62 | 7 | 8  | 16 | 45  | 0.813 | 0.788 | 0.793 | 0.992 | 123.73 | 33.62 | 28  | 45  | 580  | 64.4  | 9.14 |
| Q3U056   | Ras-interacting protein 1 OS=Mus musculus GN=Rasip1 PE=1 SV=3 - [RAIN_MOUSE]                                    | 7.49  | 1 | 4  | 4  | 7   | 0.780 | 0.729 | 1.046 | 0.992 | 30.19  | 7.49  | 5   | 7   | 961  | 103.5 | 7.83 |
| G5E896   | Enhancer of mRNA decapping 4, isoform CRA_b OS=Mus musculus GN=Edc4 PE=4 SV=1 - [G5E896_MOUSE]                  | 27.10 | 5 | 3  | 27 | 76  | 1.095 | 1.239 | 0.824 | 0.992 | 232.25 | 27.10 | 45  | 76  | 1406 | 152.4 | 5.82 |
| Q80U49   | Centrosomal protein of 170 kDa protein B OS=Mus musculus GN=Cep170b PE=1 SV=2 - [C170B_MOUSE]                   | 47.46 | 2 | 57 | 60 | 230 | 1.020 | 0.726 | 1.274 | 0.992 | 635.66 | 47.46 | 103 | 230 | 1574 | 170.7 | 6.87 |
| Q6NXH3   | Vasculin OS=Mus musculus GN=Gbbp1 PE=1 SV=1 - [GBBP1_MOUSE]                                                     | 10.15 | 4 | 3  | 4  | 11  | 2.298 | 1.708 | 1.352 | 0.992 | 49.38  | 10.15 | 5   | 11  | 473  | 53.4  | 6.90 |
| Q9CZU4   | GTPase Era, mitochondrial OS=Mus musculus GN=Era1 PE=2 SV=1 - [ERAL1_MOUSE]                                     | 9.38  | 1 | 2  | 2  | 2   | 0.815 | 1.133 | 0.814 | 0.993 | 6.17   | 9.38  | 2   | 2   | 437  | 48.2  | 8.78 |
| B1AXP6   | Mitochondrial import receptor subunit TOM5 homolog OS=Mus musculus GN=Tom5 PE=3 SV=1 - [TOME_MOUSE]             | 58.82 | 4 | 4  | 4  | 10  | 0.858 | 1.087 | 1.032 | 0.993 | 22.27  | 58.82 | 6   | 10  | 51   | 6.0   | 9.60 |
| Q9JL56   | Glycerophosphodiester phosphodiesterase 1 OS=Mus musculus GN=Gde1 PE=2 SV=1 - [GDEL_MOUSE]                      | 24.77 | 2 | 8  | 8  | 31  | 0.645 | 0.809 | 0.961 | 0.993 | 80.14  | 24.77 | 15  | 31  | 331  | 37.6  | 6.90 |
| Q64433   | 10 kDa heat shock protein, mitochondrial OS=Mus musculus GN=Hspe1 PE=1 SV=2 - [CH10_MOUSE]                      | 81.37 | 1 | 11 | 11 | 292 | 1.930 | 0.870 | 1.390 | 0.993 | 685.74 | 81.37 | 21  | 292 | 102  | 11.0  | 8.35 |
| Q8R2U0-2 | Isoform 2 of Nucleoporin SEH1 OS=Mus musculus GN=Seh1 - [SEH1_MOUSE]                                            | 40.06 | 2 | 9  | 9  | 20  | 0.991 | 1.037 | 0.859 | 0.993 | 67.59  | 40.06 | 14  | 20  | 357  | 39.4  | 7.88 |
| P15920   | V-type proton ATPase 116 kDa subunit a isoform 2 OS=Mus musculus GN=Atp6v0a2 PE=1 SV=2 [VPP2_MOUSE]             | 9.35  | 2 | 8  | 8  | 16  | 1.141 | 0.909 | 0.854 | 0.993 | 42.07  | 9.35  | 11  | 16  | 856  | 98.1  | 6.64 |
| G3X9R0   | MC68164 OS=Mus musculus GN=Cylc1 PE=4 SV=1 - [G3X9R0_MOUSE]                                                     | 5.47  | 1 | 3  | 3  | 3   | 3.456 | 2.648 | 1.236 | 0.993 | 6.92   | 5.47  | 3   | 3   | 640  | 71.4  | 9.74 |



|          |                                                                                                                          |       |    |    |    |     |       |       |       |       |        |       |    |     |      |       |      |
|----------|--------------------------------------------------------------------------------------------------------------------------|-------|----|----|----|-----|-------|-------|-------|-------|--------|-------|----|-----|------|-------|------|
| Q921T2-2 | Isoform 2 of Torsin-1A-interacting protein 1<br>OS=Mus musculus<br>GN=Tor1aip1 -                                         | 29.86 | 8  | 13 | 13 | 48  | 0.764 | 0.972 | 0.869 | 0.993 | 143.16 | 29.86 | 22 | 48  | 576  | 64.8  | 7.14 |
| Q8BLR7   | Rho-related GTP-binding protein Rho6<br>OS=Mus musculus<br>GN=Rnd1 PE=2<br>SV=1 - [RND1_MOUSE]                           | 3.88  | 1  | 1  | 1  | 1   | 1.391 | 1.001 | 0.829 | 0.993 | 2.64   | 3.88  | 1  | 1   | 232  | 26.0  | 7.75 |
| Q8VBW5-2 | Isoform 2 of HMG box transcription factor BBX<br>OS=Mus musculus<br>GN=Bbx - [BBX_MOUSE]                                 | 3.98  | 5  | 2  | 3  | 3   | 1.390 | 1.145 | 1.045 | 0.993 | 2.87   | 3.98  | 3  | 3   | 829  | 91.8  | 9.06 |
| Q8CAM5   | Ras-related protein Rab-36<br>OS=Mus musculus<br>GN=Rab36 PE=2 SV=1 - [RAB36_MOUSE]                                      | 6.37  | 1  | 1  | 1  | 6   | 2.016 | 0.898 | 0.996 | 0.993 | 19.14  | 6.37  | 2  | 6   | 267  | 29.8  | 6.23 |
| Q91Z50   | Flap endonuclease 1<br>OS=Mus musculus<br>GN=Pen1 PE=2 SV=1 - [Q91Z50_MOUSE]                                             | 11.05 | 2  | 4  | 4  | 7   | 1.010 | 0.723 | 1.015 | 0.993 | 18.13  | 11.05 | 7  | 7   | 380  | 42.6  | 8.34 |
| O08677   | Kinogen-1<br>OS=Mus musculus<br>GN=Kng1 PE=1<br>SV=1 - [KNG1_MOUSE]                                                      | 26.78 | 4  | 16 | 17 | 82  | 3.103 | 1.731 | 0.727 | 0.993 | 262.09 | 26.78 | 31 | 82  | 661  | 73.1  | 6.54 |
| Q8BYA0   | Tubulin-specific chaperone D<br>OS=Mus musculus<br>GN=Tbcd PE=2 SV=1 - [TBCD_MOUSE]                                      | 30.43 | 3  | 28 | 29 | 74  | 0.733 | 0.791 | 0.797 | 0.993 | 216.83 | 30.43 | 47 | 74  | 1196 | 133.2 | 6.51 |
| Q8BHN3   | Neutral alpha-glucosidase AB<br>OS=Mus musculus<br>GN=Ganab PE=1 SV=1 - [GANAB_MOUSE]                                    | 29.13 | 3  | 24 | 24 | 116 | 0.797 | 1.008 | 0.876 | 0.993 | 349.20 | 29.13 | 45 | 116 | 944  | 106.8 | 6.06 |
| Q921W4   | Quinone oxidoreductase-like protein 1<br>OS=Mus musculus<br>GN=Cryz11 PE=2<br>SV=1 - [QORLL_MOUSE]                       | 29.60 | 6  | 10 | 10 | 28  | 1.114 | 1.141 | 0.912 | 0.993 | 73.96  | 29.60 | 18 | 28  | 348  | 38.7  | 5.97 |
| E9PV57   | Peroxisome proliferator-activated receptor delta (Fragment)<br>OS=Mus musculus<br>GN=Ppard PE=2<br>SV=1 - [E9PV57_MOUSE] | 7.54  | 2  | 1  | 1  | 1   | 0.742 | 0.547 | 0.987 | 0.993 | 0.00   | 7.54  | 1  | 1   | 252  | 28.2  | 8.18 |
| P39038   | Cadherin-4<br>OS=Mus musculus<br>GN=Cdh4 PE=2<br>SV=1 - [CADH4_MOUSE]                                                    | 17.74 | 2  | 12 | 12 | 36  | 0.891 | 1.987 | 1.120 | 0.993 | 70.72  | 17.74 | 21 | 36  | 913  | 100.0 | 4.81 |
| G3UWD5   | MCG66639, isoform CRA_b<br>OS=Mus musculus<br>GN=A330050F15Rik PE=4<br>SV=1 - [G3UWD5_MOUSE]                             | 11.59 | 1  | 1  | 1  | 2   | 2.301 | 0.428 | 0.857 | 0.993 | 4.36   | 11.59 | 2  | 2   | 69   | 7.7   | 9.55 |
| O54692   | Centromere/kinetochore protein zw10 homolog<br>OS=Mus musculus<br>GN=Zw10 PE=2 SV=3 - [ZW10_MOUSE]                       | 20.92 | 1  | 13 | 13 | 27  | 0.755 | 0.954 | 0.827 | 0.993 | 78.52  | 20.92 | 20 | 27  | 779  | 88.0  | 5.92 |
| Q88EF6   | Brain-enriched guanylate kinase-associated protein<br>OS=Mus musculus<br>GN=Begain PE=1 SV=2 - [BEGIN_MOUSE]             | 46.83 | 2  | 21 | 21 | 74  | 1.109 | 1.350 | 1.504 | 0.993 | 202.41 | 46.83 | 35 | 74  | 600  | 65.3  | 5.87 |
| P06728   | Apolipoprotein A-IV<br>OS=Mus musculus<br>GN=Apoa4 PE=2 SV=3 - [APOA4_MOUSE]                                             | 71.14 | 1  | 24 | 24 | 119 | 3.120 | 3.715 | 0.515 | 0.993 | 334.86 | 71.14 | 42 | 119 | 395  | 45.0  | 5.47 |
| P42669   | Transcriptional activator protein Pur-alpha<br>OS=Mus musculus<br>GN=Pura PE=1<br>SV=1 - [PURA_MOUSE]                    | 66.36 | 1  | 21 | 25 | 175 | 1.117 | 0.823 | 0.883 | 0.993 | 453.93 | 66.36 | 43 | 175 | 321  | 34.9  | 6.44 |
| Q9D3D0   | Alpha-tocopherol transfer protein-like<br>OS=Mus musculus<br>GN=Ttpal PE=2<br>SV=3 - [TTPAL_MOUSE]                       | 14.58 | 3  | 4  | 4  | 17  | 0.972 | 1.883 | 1.313 | 0.993 | 47.26  | 14.58 | 8  | 17  | 343  | 38.8  | 6.44 |
| F8VPK0   | Protein Ttc37<br>OS=Mus musculus<br>GN=Ttc37 PE=2<br>SV=1 - [F8VPK0_MOUSE]                                               | 15.04 | 1  | 19 | 20 | 53  | 0.706 | 0.858 | 0.852 | 0.994 | 163.44 | 15.04 | 35 | 53  | 1563 | 173.8 | 7.12 |
| A2ACM0   | Regulatory-associated protein of mTOR<br>OS=Mus musculus<br>GN=Rptor PE=4<br>SV=1 - [A2ACM0_MOUSE]                       | 18.13 | 10 | 20 | 21 | 63  | 0.626 | 0.923 | 0.884 | 0.994 | 182.25 | 18.13 | 36 | 63  | 1335 | 149.4 | 6.87 |
| E9Q390   | Myoferlin<br>OS=Mus musculus<br>GN=Myof PE=2<br>SV=2 - [E9Q390_MOUSE]                                                    | 6.15  | 5  | 8  | 10 | 15  | 1.286 | 2.269 | 0.980 | 0.994 | 29.89  | 6.15  | 13 | 15  | 2048 | 233.2 | 6.23 |
| Q91YM2   | Rho GTPase-activating protein 35<br>OS=Mus musculus<br>GN=Arhgap35 PE=1<br>SV=3 -                                        | 42.23 | 1  | 50 | 50 | 162 | 0.799 | 0.974 | 0.916 | 0.994 | 450.32 | 42.23 | 88 | 162 | 1499 | 170.3 | 6.61 |
| Q9CYG7   | Mitochondrial import receptor subunit TOM34<br>OS=Mus musculus<br>GN=Tom34 PE=2 SV=1 - [TOM34_MOUSE]                     | 46.93 | 2  | 12 | 12 | 48  | 1.018 | 1.103 | 0.863 | 0.994 | 106.23 | 46.93 | 23 | 48  | 309  | 34.3  | 9.14 |
| Q9Z2Y8   | Proline synthase co-transcribed bacterial homolog protein<br>OS=Mus musculus<br>GN=Prosc PE=1<br>SV=1 - [PROSC_MOUSE]    | 46.72 | 2  | 12 | 13 | 58  | 1.766 | 1.077 | 0.977 | 0.994 | 158.71 | 46.72 | 22 | 58  | 274  | 30.0  | 8.27 |
| E9Q3G7   | Probable phospholipid-transporting ATPase IH<br>OS=Mus musculus<br>GN=Atp11a PE=2 SV=1 - [E9Q3G7_MOUSE]                  | 7.97  | 4  | 6  | 9  | 17  | 1.303 | 0.845 | 0.893 | 0.994 | 39.92  | 7.97  | 13 | 17  | 1142 | 130.6 | 6.60 |
| P15327   | Bisphosphoglycerate mutase<br>OS=Mus musculus<br>GN=Bpgm PE=2 SV=2 - [PMGE_MOUSE]                                        | 57.14 | 4  | 11 | 11 | 56  | 1.931 | 1.191 | 0.605 | 0.994 | 175.67 | 57.14 | 20 | 56  | 259  | 30.0  | 7.06 |

|        |                                                                                                                                               |       |    |    |     |     |       |       |       |       |         |       |     |     |      |       |       |
|--------|-----------------------------------------------------------------------------------------------------------------------------------------------|-------|----|----|-----|-----|-------|-------|-------|-------|---------|-------|-----|-----|------|-------|-------|
| B2RXC6 | DNA-directed RNA polymerase OS=Mus musculus GN=Polr3a PE=2 SV=1 - [B2RXC6_MOUSE]                                                              | 7.55  | 1  | 7  | 8   | 14  | 0.987 | 0.894 | 0.857 | 0.994 | 30.89   | 7.55  | 12  | 14  | 1390 | 155.6 | 8.50  |
| Q8BHL8 | Proteasome inhibitor P131 subunit OS=Mus musculus GN=Psmf1 PE=1 SV=1 - [PSMF1_MOUSE]                                                          | 21.77 | 1  | 7  | 7   | 26  | 1.658 | 1.066 | 1.054 | 0.994 | 55.41   | 21.77 | 12  | 26  | 271  | 29.6  | 5.25  |
| Q9JLN9 | Serine/threonine-protein kinase mTOR OS=Mus musculus GN=Mtor PE=1 SV=2 - [MTOR_MOUSE]                                                         | 25.54 | 3  | 53 | 56  | 175 | 0.654 | 0.932 | 0.876 | 0.994 | 536.75  | 25.54 | 95  | 175 | 2549 | 288.6 | 7.17  |
| G3X920 | Armadillo repeat containing 8, isoform CRA_b OS=Mus musculus GN=Armc8 PE=4 SV=1 - [G3X920_MOUSE]                                              | 23.48 | 2  | 4  | 14  | 44  | 0.776 | 1.511 | 0.999 | 0.994 | 116.83  | 23.48 | 24  | 44  | 673  | 75.4  | 6.73  |
| O55222 | Integrin-linked protein kinase OS=Mus musculus GN=Ilk PE=1 SV=2 - [ILK_MOUSE]                                                                 | 24.56 | 3  | 11 | 12  | 37  | 0.775 | 1.289 | 0.918 | 0.994 | 92.90   | 24.56 | 20  | 37  | 452  | 51.3  | 8.07  |
| Q9WV34 | MAGUK p55 subfamily member 2 OS=Mus musculus GN=Mpp2 PE=1 SV=1 - [MPP2_MOUSE]                                                                 | 62.32 | 2  | 30 | 30  | 147 | 0.750 | 1.555 | 1.387 | 0.994 | 396.46  | 62.32 | 54  | 147 | 552  | 61.5  | 6.44  |
| Q8BXR5 | Sodium leak channel non-selective protein OS=Mus musculus GN=Nalcn PE=1 SV=2 - [NALCN_MOUSE]                                                  | 2.88  | 3  | 4  | 5   | 5   | 5.278 | 1.787 | 1.307 | 0.994 | 8.86    | 2.88  | 5   | 5   | 1738 | 200.3 | 8.68  |
| Q8VDS3 | Chromobox protein homolog 7 OS=Mus musculus GN=Cbx7 PE=1 SV=1 - [CBX7_MOUSE]                                                                  | 6.33  | 3  | 1  | 1   | 2   | 1.273 | 1.105 | 1.525 | 0.994 | 4.37    | 6.33  | 2   | 2   | 158  | 18.1  | 5.20  |
| Q6PEV3 | WAS/WASL-interacting protein family member 2 OS=Mus musculus GN=Wipf2 PE=2 SV=1 - [WIPF2_MOUSE]                                               | 69.09 | 2  | 23 | 23  | 142 | 1.501 | 0.773 | 1.307 | 0.994 | 416.05  | 69.09 | 41  | 142 | 440  | 46.3  | 10.99 |
| P62855 | 40S ribosomal protein S26 OS=Mus musculus GN=Rps26 PE=2 SV=3 - [RS26_MOUSE]                                                                   | 26.09 | 1  | 3  | 3   | 5   | 0.637 | 1.024 | 0.789 | 0.994 | 12.54   | 26.09 | 4   | 5   | 115  | 13.0  | 11.00 |
| Q8CB62 | Centrobilin OS=Mus musculus GN=Cntrob PE=2 SV=2 - [CNTRB_MOUSE]                                                                               | 3.16  | 2  | 2  | 2   | 3   | 0.909 | 0.972 | 1.201 | 0.994 | 2.90    | 3.16  | 3   | 3   | 887  | 99.3  | 5.55  |
| P06801 | NADP-dependent malic enzyme OS=Mus musculus GN=Me1 PE=1 SV=2 - [MAOX_MOUSE]                                                                   | 50.70 | 1  | 22 | 22  | 109 | 0.767 | 0.657 | 0.756 | 0.994 | 304.97  | 50.70 | 40  | 109 | 572  | 63.9  | 7.44  |
| A2AEW0 | Transcription factor E3 OS=Mus musculus GN=Tfe3 PE=2 SV=1 - [A2AEW0_MOUSE]                                                                    | 24.77 | 16 | 3  | 7   | 8   | 1.258 | 1.478 | 1.140 | 0.995 | 20.64   | 24.77 | 8   | 8   | 537  | 57.7  | 6.37  |
| D6RJ69 | Bardet-Biedl syndrome 5 protein homolog OS=Mus musculus GN=Bbs5 PE=2 SV=1 - [D6RJ69_MOUSE]                                                    | 20.45 | 3  | 1  | 1   | 2   | 0.754 | 1.640 | 0.744 | 0.995 | 2.88    | 20.45 | 2   | 2   | 88   | 9.9   | 6.01  |
| Q3UKJ7 | WD40 repeat-containing protein SMU1 OS=Mus musculus GN=Smu1 PE=2 SV=2 - [SMU1_MOUSE]                                                          | 28.46 | 2  | 11 | 11  | 24  | 1.170 | 1.251 | 0.852 | 0.995 | 57.44   | 28.46 | 19  | 24  | 513  | 57.5  | 7.18  |
| Q922Q9 | Chitinase domain-containing protein 1 OS=Mus musculus GN=Chid1 PE=2 SV=1 - [CHID1_MOUSE]                                                      | 22.90 | 4  | 8  | 8   | 17  | 0.816 | 0.986 | 0.846 | 0.995 | 46.50   | 22.90 | 13  | 17  | 393  | 44.9  | 7.97  |
| Q8R310 | Transmembrane and coiled coil domains protein 3 OS=Mus musculus GN=Tmcc3 PE=1 SV=2 - [TMCC3_MOUSE]                                            | 29.98 | 5  | 10 | 11  | 31  | 1.300 | 0.982 | 0.864 | 0.995 | 75.78   | 29.98 | 20  | 31  | 477  | 53.7  | 8.60  |
| AZAGS6 | Tumor protein p53-inducible protein 11 (Fragment) OS=Mus musculus GN=Trp53i11 PE=2 SV=1 - [AZAGS6_MOUSE]                                      | 19.54 | 2  | 2  | 2   | 4   | 0.752 | 2.302 | 0.881 | 0.995 | 9.81    | 19.54 | 3   | 4   | 87   | 9.6   | 9.60  |
| E9Q9X1 | Dystonin OS=Mus musculus GN=Dst PE=4 SV=2 - [E9Q9X1_MOUSE]                                                                                    | 24.48 | 4  | 5  | 162 | 514 | 1.294 | 0.619 | 0.903 | 0.995 | 1497.42 | 24.48 | 268 | 514 | 7406 | 835.2 | 5.31  |
| Q60963 | Platelet-activating factor acetylhydrolase OS=Mus musculus GN=Pla2g7 PE=2 SV=2 - [PAFA_MOUSE]                                                 | 29.55 | 5  | 12 | 12  | 28  | 1.374 | 1.035 | 0.946 | 0.995 | 83.00   | 29.55 | 19  | 28  | 440  | 49.2  | 7.12  |
| Q91WQ5 | TAF5-like RNA polymerase II p300/CBP-associated factor-associated factor 65 kDa subunit 5L OS=Mus musculus GN=Taf5l PE=2 SV=1 - [TAF5L_MOUSE] | 1.87  | 1  | 1  | 1   | 1   | 0.894 | 0.935 | 1.039 | 0.995 | 2.86    | 1.87  | 1   | 1   | 589  | 65.9  | 5.92  |
| Q8CJ19 | Protein-methionine sulfoxide oxidase MICAL3 OS=Mus musculus GN=Mical3 PE=1 SV=2 - [MICAL3_MOUSE]                                              | 29.35 | 9  | 51 | 56  | 186 | 0.826 | 0.938 | 1.191 | 0.995 | 489.29  | 29.35 | 96  | 186 | 1993 | 223.6 | 5.47  |
| E9Q6X0 | Microtubule-associated protein RP/EB family member 2 OS=Mus musculus GN=Mapre2 PE=2 SV=1 - [MAPRE2_MOUSE]                                     | 63.73 | 5  | 13 | 16  | 89  | 0.737 | 0.960 | 1.041 | 0.995 | 249.65  | 63.73 | 28  | 89  | 284  | 32.2  | 5.26  |
| Q9WVQ1 | Membrane-associated guanylate kinase, WW and PDZ domain-containing protein 2 OS=Mus musculus GN=Magi2 PE=1 SV=2 - [MAGI2_MOUSE]               | 34.90 | 4  | 35 | 38  | 132 | 1.110 | 0.984 | 1.085 | 0.995 | 353.98  | 34.90 | 64  | 132 | 1275 | 140.8 | 6.19  |

|          |                                                                                                    |       |    |    |    |     |       |       |       |       |        |       |    |     |      |       |      |
|----------|----------------------------------------------------------------------------------------------------|-------|----|----|----|-----|-------|-------|-------|-------|--------|-------|----|-----|------|-------|------|
| Q92289-3 | Isoform 3 of Sperm-specific antigen 2 homolog OS=Mus musculus GN=Sofa2 -                           | 1.36  | 4  | 2  | 2  | 2   | 2.401 | 1.429 | 0.956 | 0.995 | 3.50   | 1.36  | 2  | 2   | 1101 | 120.1 | 5.38 |
| Q9D415   | Disks large-associated protein 1 OS=Mus musculus GN=Dlgap1 PE=1 SV=3 -                             | 34.48 | 10 | 12 | 29 | 114 | 0.659 | 1.429 | 1.483 | 0.995 | 311.29 | 34.48 | 41 | 114 | 992  | 110.3 | 7.09 |
| Q9DAK9   | 14 kDa phosphohistidine phosphatase OS=Mus musculus GN=Pppt1 PE=1 SV=1 - [PHP14_MOUSE]             | 51.61 | 1  | 7  | 7  | 74  | 1.487 | 0.897 | 0.996 | 0.996 | 186.08 | 51.61 | 13 | 74  | 124  | 14.0  | 5.53 |
| Q91XY0   | MCG133388, isoform CRA_m OS=Mus musculus GN=Pcdhga8 PE=2 SV=1 - [Q91XY0_MOUSE]                     | 8.58  | 1  | 2  | 7  | 28  | 1.128 | 1.421 | 1.239 | 0.996 | 76.19  | 8.58  | 14 | 28  | 932  | 101.4 | 5.11 |
| P61294   | Ras-related protein Rab-6B OS=Mus musculus GN=Rab6b PE=1 SV=1 - [RAB6B_MOUSE]                      | 60.58 | 1  | 6  | 12 | 134 | 0.714 | 0.904 | 1.030 | 0.996 | 361.46 | 60.58 | 22 | 134 | 208  | 23.4  | 5.53 |
| O55091   | Protein IMPACT OS=Mus musculus GN=Impact PE=1 SV=2 - [IMPCT_MOUSE]                                 | 39.94 | 1  | 13 | 14 | 88  | 0.991 | 0.716 | 0.709 | 0.996 | 266.54 | 39.94 | 23 | 88  | 318  | 36.3  | 5.05 |
| Q99N88   | Ubiquitin-4 OS=Mus musculus GN=Ubqln4 PE=1 SV=1 - [UBQL4_MOUSE]                                    | 19.13 | 1  | 5  | 8  | 119 | 1.696 | 1.105 | 1.135 | 0.996 | 322.21 | 19.13 | 15 | 119 | 596  | 63.5  | 5.03 |
| G3X956   | FACT complex subunit SPT16 OS=Mus musculus GN=Supt16 PE=4 SV=1 - [G3X956_MOUSE]                    | 20.34 | 2  | 22 | 22 | 57  | 0.805 | 0.717 | 0.877 | 0.996 | 161.61 | 20.34 | 36 | 57  | 1047 | 119.8 | 5.66 |
| Q9Z1T1   | AP-3 complex subunit beta 1 OS=Mus musculus GN=Ap3b1 PE=1 SV=2 - [AP3B1_MOUSE]                     | 17.92 | 1  | 15 | 23 | 55  | 0.853 | 1.295 | 0.948 | 0.996 | 116.18 | 17.92 | 39 | 55  | 1105 | 122.7 | 5.66 |
| E9PYE2   | tRNA wybutosine-synthesizing protein 3 homolog OS=Mus musculus GN=Tyw3 PE=2 SV=1 - [E9PYE2_MOUSE]  | 18.06 | 3  | 2  | 2  | 5   | 1.412 | 0.935 | 1.186 | 0.996 | 14.94  | 18.06 | 3  | 5   | 144  | 15.7  | 7.34 |
| Q9QUR8   | Semaphorin-7A OS=Mus musculus GN=Sema7a PE=1 SV=1 - [SEM7A_MOUSE]                                  | 27.71 | 1  | 15 | 15 | 42  | 1.243 | 0.559 | 1.126 | 0.996 | 120.04 | 27.71 | 24 | 42  | 664  | 74.9  | 7.74 |
| AZA699   | Protein FAM171A2 OS=Mus musculus GN=Fam171a2 PE=2 SV=1 - [F1712_MOUSE]                             | 18.25 | 2  | 12 | 12 | 48  | 0.601 | 1.211 | 1.097 | 0.996 | 165.69 | 18.25 | 22 | 48  | 822  | 87.4  | 8.05 |
| Q05CL8   | La-related protein 7 OS=Mus musculus GN=Larp7 PE=1 SV=2 - [LARF7_MOUSE]                            | 21.58 | 3  | 11 | 11 | 22  | 0.871 | 0.979 | 0.937 | 0.996 | 53.21  | 21.58 | 16 | 22  | 570  | 64.8  | 9.54 |
| O08747   | Netrin receptor UNC5C OS=Mus musculus GN=Unc5c PE=1 SV=1 - [UNC5C_MOUSE]                           | 8.16  | 3  | 7  | 7  | 14  | 0.665 | 1.528 | 1.018 | 0.996 | 36.06  | 8.16  | 11 | 14  | 931  | 103.0 | 6.01 |
| Q8BPG6   | Sulfatase-modifying factor 2 OS=Mus musculus GN=Sumf2 PE=2 SV=2 - [SUMF2_MOUSE]                    | 21.43 | 2  | 4  | 5  | 11  | 1.383 | 1.566 | 0.990 | 0.996 | 35.44  | 21.43 | 9  | 11  | 308  | 34.7  | 7.11 |
| Q3UJPS   | Protein C8orf37 homolog OS=Mus musculus PE=1 SV=1 - [CH037_MOUSE]                                  | 27.75 | 2  | 6  | 6  | 27  | 1.547 | 1.177 | 1.140 | 0.996 | 58.53  | 27.75 | 11 | 27  | 209  | 23.8  | 6.86 |
| Q69Z26   | Transmembrane and coiled coil domains protein 1 OS=Mus musculus GN=Tmcc1 PE=1 SV=2 - [TMCC1_MOUSE] | 28.35 | 8  | 13 | 15 | 37  | 1.232 | 0.979 | 1.232 | 0.996 | 87.06  | 28.35 | 24 | 37  | 649  | 71.6  | 6.55 |
| E9PXG1   | Transporter OS=Mus musculus GN=Slc6a12 PE=2 SV=1 - [E9PXG1_MOUSE]                                  | 8.26  | 4  | 3  | 4  | 22  | 0.517 | 3.304 | 0.553 | 0.996 | 64.83  | 8.26  | 6  | 22  | 557  | 63.0  | 6.11 |
| A2RSJ4   | UHRF1-binding protein 1-like OS=Mus musculus GN=Uhrf1bp1 PE=2 SV=2 - [UH1BL_MOUSE]                 | 29.24 | 1  | 31 | 35 | 110 | 0.862 | 1.101 | 1.158 | 0.996 | 310.69 | 29.24 | 55 | 110 | 1457 | 161.8 | 6.61 |
| Q5S003   | Sperm-associated antigen 17 OS=Mus musculus GN=Spag17 PE=1 SV=1 - [SPG17_MOUSE]                    | 2.85  | 2  | 4  | 5  | 10  | 2.071 | 1.286 | 1.611 | 0.997 | 12.92  | 2.85  | 5  | 10  | 2175 | 246.2 | 6.01 |
| Q9CXE7   | Transmembrane emp24 domain-containing protein 5 OS=Mus musculus GN=Tmed5 PE=2 SV=1 - [TMED5_MOUSE] | 17.03 | 6  | 4  | 4  | 15  | 1.580 | 1.048 | 0.750 | 0.997 | 37.21  | 17.03 | 8  | 15  | 229  | 26.2  | 4.93 |
| Q99L12   | Chloride channel CLIC-like protein 1 OS=Mus musculus GN=Clic1 PE=1 SV=1 - [CLCC1_MOUSE]            | 17.25 | 2  | 8  | 8  | 14  | 1.025 | 1.138 | 1.026 | 0.997 | 34.02  | 17.25 | 13 | 14  | 539  | 60.6  | 5.68 |
| Q3TZZZ   | Extended synaptotagmin-2 OS=Mus musculus GN=Esy2 PE=1 SV=1 - [ESYT2_MOUSE]                         | 23.79 | 2  | 15 | 16 | 41  | 0.649 | 1.121 | 1.025 | 0.997 | 139.08 | 23.79 | 29 | 41  | 845  | 94.1  | 7.75 |
| Q8BHS3   | Pre-mRNA-splicing factor RBM22 OS=Mus musculus GN=Rbm22 PE=2 SV=1 - [RBM22_MOUSE]                  | 19.05 | 1  | 7  | 8  | 16  | 1.081 | 0.782 | 1.152 | 0.997 | 41.03  | 19.05 | 11 | 16  | 420  | 46.9  | 8.54 |
| Q9ES34   | Ubiquitin-protein ligase E3B OS=Mus musculus GN=Ube3b PE=2 SV=3 - [UBE3B_MOUSE]                    | 7.85  | 1  | 6  | 6  | 14  | 1.168 | 0.762 | 1.334 | 0.997 | 18.80  | 7.85  | 8  | 14  | 1070 | 122.7 | 8.32 |
| Q9DAV9   | Trimeric intracellular cation channel type B OS=Mus musculus GN=Tmem38b PE=2 SV=1 - [TM38B_MOUSE]  | 3.77  | 1  | 2  | 2  | 10  | 0.476 | 0.783 | 0.907 | 0.997 | 17.18  | 3.77  | 2  | 10  | 292  | 32.6  | 9.11 |

|          |                                                                                                              |       |    |    |    |     |       |       |       |       |        |       |    |     |      |       |      |
|----------|--------------------------------------------------------------------------------------------------------------|-------|----|----|----|-----|-------|-------|-------|-------|--------|-------|----|-----|------|-------|------|
| Q9CVD2   | Ataxin-3 OS=Mus musculus GN=Abxn3 PE=1 SV=2 - [ATX3_MOUSE]                                                   | 17.75 | 5  | 6  | 6  | 21  | 1.377 | 1.216 | 1.314 | 0.997 | 51.44  | 17.75 | 9  | 21  | 355  | 40.5  | 4.83 |
| Q9CW13   | BRCA2 and CDKN1A-interacting protein OS=Mus musculus GN=Bccip PE=2 SV=1 - [BCCIP_MOUSE]                      | 17.72 | 1  | 5  | 5  | 8   | 1.326 | 0.946 | 0.921 | 0.997 | 22.07  | 17.72 | 7  | 8   | 316  | 35.9  | 4.45 |
| Q9QZ73   | DCN1-like protein 1 OS=Mus musculus GN=Dcn1d1 PE=2 SV=1 - [DCN1L_MOUSE]                                      | 32.43 | 5  | 6  | 7  | 24  | 1.126 | 0.912 | 0.974 | 0.997 | 70.06  | 32.43 | 12 | 24  | 259  | 30.1  | 5.34 |
| G3X8P5   | Sodium/iodide cotransporter OS=Mus musculus GN=Slc5a5 PE=3 SV=1 -                                            | 1.62  | 2  | 1  | 1  | 2   | 1.264 | 3.523 | 0.767 | 0.997 | 1.64   | 1.62  | 2  | 2   | 618  | 65.5  | 7.49 |
| Q9ERF3   | WD repeat-containing protein 61 OS=Mus musculus GN=Wdr61 PE=2 SV=1 -                                         | 35.08 | 4  | 7  | 7  | 26  | 0.898 | 1.035 | 0.914 | 0.997 | 80.72  | 35.08 | 13 | 26  | 305  | 33.8  | 5.36 |
| P15307   | Proto-oncogene c-Rel OS=Mus musculus GN=Rel PE=1 SV=2 - [REL_MOUSE]                                          | 2.39  | 2  | 1  | 1  | 2   | 1.516 | 1.046 | 1.238 | 0.997 | 6.80   | 2.39  | 2  | 2   | 587  | 64.9  | 6.54 |
| O55186   | CD59A glycoprotein OS=Mus musculus GN=Cd59a PE=2 SV=1 - [CD59A_MOUSE]                                        | 13.82 | 1  | 1  | 1  | 2   | 3.014 | 0.839 | 0.930 | 0.997 | 9.17   | 13.82 | 1  | 2   | 123  | 13.6  | 7.47 |
| P56391   | Cytochrome c oxidase subunit 6B1 OS=Mus musculus GN=Cox6b1 PE=1 SV=2 -                                       | 70.93 | 1  | 8  | 8  | 202 | 1.834 | 0.705 | 1.360 | 0.997 | 518.77 | 70.93 | 16 | 202 | 86   | 10.1  | 8.72 |
| E9Q6Q2   | Serine/threonine-protein kinase Wnk2 OS=Mus musculus GN=Wnk2 PE=2 SV=1 - [E9Q6Q2_MOUSE]                      | 26.17 | 18 | 32 | 39 | 154 | 0.798 | 0.865 | 1.295 | 0.997 | 450.12 | 26.17 | 69 | 154 | 1991 | 211.0 | 5.78 |
| Q9J1Y5   | Serine protease HTRA2, mitochondrial OS=Mus musculus GN=Htra2 PE=1 SV=2 - [HTRA2_MOUSE]                      | 26.42 | 4  | 2  | 10 | 40  | 1.073 | 0.716 | 0.762 | 0.997 | 123.71 | 26.42 | 19 | 40  | 458  | 49.3  | 9.60 |
| Q80YA7   | Dipeptidyl peptidase 8 OS=Mus musculus GN=Dpp8 PE=1 SV=1 - [DPP8_MOUSE]                                      | 24.44 | 1  | 14 | 15 | 61  | 0.951 | 1.002 | 0.940 | 0.997 | 172.95 | 24.44 | 26 | 61  | 892  | 102.1 | 5.81 |
| Q8BFJ4   | GAP/RGS19 short isoform OS=Mus musculus GN=Rgs19 PE=2 SV=1 - [Q8BFJ4_MOUSE]                                  | 10.31 | 5  | 1  | 2  | 8   | 0.521 | 1.424 | 0.997 | 0.997 | 22.85  | 10.31 | 4  | 8   | 194  | 22.2  | 6.38 |
| Q9JIG7   | Coiled-coil domain-containing protein 22 OS=Mus musculus GN=Cdc22 PE=1 SV=1 - [CCD22_MOUSE]                  | 40.83 | 1  | 20 | 20 | 71  | 0.849 | 1.259 | 0.908 | 0.997 | 224.02 | 40.83 | 36 | 71  | 627  | 70.8  | 6.01 |
| O54774   | AP-3 complex subunit delta-1 OS=Mus musculus GN=Ap3d1 PE=1 SV=1 - [AP3D1_MOUSE]                              | 36.78 | 1  | 33 | 33 | 102 | 0.534 | 0.930 | 1.027 | 0.997 | 297.98 | 36.78 | 53 | 102 | 1199 | 135.0 | 7.37 |
| Q9WV89-4 | Isoform 4 of Syntaxin-binding protein 4 OS=Mus musculus GN=Stxbp4 - [STXB4_MOUSE]                            | 5.77  | 4  | 2  | 3  | 5   | 1.197 | 1.108 | 1.208 | 0.997 | 11.56  | 5.77  | 4  | 5   | 520  | 57.5  | 5.44 |
| Q8BZIO   | Actin filament-associated protein 1-like 1 OS=Mus musculus GN=Afp1l1 PE=1 SV=1 - [AF1L1_MOUSE]               | 11.20 | 2  | 5  | 5  | 8   | 1.374 | 0.499 | 1.302 | 0.997 | 19.52  | 11.20 | 7  | 8   | 768  | 86.6  | 6.77 |
| Q9QWR8   | Alpha-N-acetylgalactosaminidase OS=Mus musculus GN=Naga PE=2 SV=2 -                                          | 19.76 | 1  | 7  | 8  | 14  | 1.611 | 1.224 | 1.069 | 0.997 | 39.21  | 19.76 | 11 | 14  | 415  | 47.2  | 6.44 |
| Q80XC6   | Protein NRDE2 homolog OS=Mus musculus GN=Nrde2 PE=2 SV=3 - [NRDE2_MOUSE]                                     | 3.16  | 1  | 3  | 3  | 4   | 1.334 | 0.775 | 1.388 | 0.997 | 5.00   | 3.16  | 3  | 4   | 1172 | 133.4 | 7.93 |
| O35144-2 | Isoform 2 of Telomeric repeat-binding factor 2 OS=Mus musculus GN=Terf2 -                                    | 15.32 | 5  | 5  | 5  | 10  | 1.308 | 1.063 | 1.011 | 0.997 | 29.63  | 15.32 | 8  | 10  | 470  | 51.8  | 9.55 |
| O08919   | Numb-like protein OS=Mus musculus GN=Numb PE=1 SV=3 - [NUMBL_MOUSE]                                          | 26.16 | 1  | 11 | 14 | 60  | 0.886 | 1.367 | 1.272 | 0.997 | 184.33 | 26.16 | 27 | 60  | 604  | 64.1  | 8.82 |
| P01101   | Proto-oncogene c-Fos OS=Mus musculus GN=Fos PE=1 SV=1 - [FOS_MOUSE]                                          | 4.47  | 1  | 1  | 1  | 1   | 1.810 | 2.214 | 0.818 | 0.997 | 3.17   | 4.47  | 1  | 1   | 380  | 40.8  | 4.87 |
| H3BLE4   | Epidermal growth factor receptor substrate 15 (Fragment) OS=Mus musculus GN=Eps15 PE=4 SV=1 - [H3BLE4_MOUSE] | 45.33 | 1  | 1  | 4  | 8   | 1.751 | 0.993 | 1.186 | 0.997 | 22.09  | 45.33 | 6  | 8   | 150  | 15.5  | 4.41 |
| Q6QD59   | Vesicle transport protein SEC20 OS=Mus musculus GN=Bnip1 PE=2 SV=1 - [SEC20_MOUSE]                           | 44.74 | 4  | 9  | 9  | 35  | 0.945 | 1.081 | 0.932 | 0.998 | 102.66 | 44.74 | 16 | 35  | 228  | 26.2  | 8.75 |
| G3X9V4   | Glutamate receptor ionotropic, NMDA 2B OS=Mus musculus GN=Grin2b PE=4 SV=1 - [G3X9V4_MOUSE]                  | 23.41 | 2  | 28 | 30 | 105 | 0.611 | 1.672 | 1.644 | 0.998 | 278.55 | 23.41 | 52 | 105 | 1482 | 165.9 | 6.87 |
| P61460   | DEP domain-containing protein 5 OS=Mus musculus GN=Depdc5 PE=1 SV=2 -                                        | 14.14 | 8  | 1  | 16 | 36  | 0.827 | 1.216 | 1.212 | 0.998 | 90.13  | 14.14 | 24 | 36  | 1591 | 180.3 | 6.74 |

|          |                                                                                                                                   |       |   |    |    |     |       |       |       |       |        |       |    |     |      |       |       |
|----------|-----------------------------------------------------------------------------------------------------------------------------------|-------|---|----|----|-----|-------|-------|-------|-------|--------|-------|----|-----|------|-------|-------|
| Q5SWD9-3 | Isoform 3 of Pre-rRNA-processing protein TSR1 homolog OS=Mus musculus GN=Tsr1 - [TSR1_MOUSE]                                      | 9.42  | 3 | 3  | 3  | 4   | 1.459 | 1.084 | 0.830 | 0.998 | 13.10  | 9.42  | 4  | 4   | 382  | 43.0  | 8.63  |
| Q3UHH2   | Solute carrier family 22 member 23 OS=Mus musculus GN=Slc22a23 PE=2 SV=1 - [SLC22A23_MOUSE]                                       | 16.40 | 4 | 8  | 8  | 25  | 0.980 | 0.696 | 1.018 | 0.998 | 88.77  | 16.40 | 15 | 25  | 689  | 74.3  | 7.83  |
| Q8K3J5-2 | Isoform 2 of Zinc finger protein 131 OS=Mus musculus GN=Znf131 - [ZNF131_MOUSE]                                                   | 10.43 | 3 | 3  | 3  | 4   | 2.149 | 1.269 | 0.819 | 0.998 | 2.67   | 10.43 | 3  | 4   | 585  | 66.9  | 5.16  |
| Q9D4F2   | Presqualene diphosphate phosphatase OS=Mus musculus GN=Ppadc2 PE=1 SV=1 - [PPAC2_MOUSE]                                           | 8.22  | 1 | 2  | 2  | 8   | 0.288 | 0.865 | 1.117 | 0.998 | 35.22  | 8.22  | 4  | 8   | 292  | 31.7  | 10.29 |
| Q9WV69   | Dematin OS=Mus musculus GN=Dmtn PE=1 SV=1 - [DEMA_MOUSE]                                                                          | 62.22 | 4 | 19 | 20 | 206 | 1.495 | 1.047 | 1.701 | 0.998 | 575.62 | 62.22 | 38 | 206 | 405  | 45.4  | 8.41  |
| D3Z3V2   | CMP-N-acetylneuraminate-beta-galactosamide-alpha-2,3-sialyltransferase 2 OS=Mus musculus GN=St3gal2 PE=2 SV=1 - [D3Z3V2_MOUSE]    | 18.15 | 2 | 4  | 4  | 7   | 0.777 | 0.898 | 0.796 | 0.998 | 12.42  | 18.15 | 5  | 7   | 303  | 34.6  | 8.53  |
| F7B8B2   | Protein Tmem132b OS=Mus musculus GN=Tmem132b PE=4 SV=1 - [F7B8B2_MOUSE]                                                           | 16.60 | 1 | 15 | 15 | 41  | 1.073 | 2.539 | 1.714 | 0.998 | 124.72 | 16.60 | 24 | 41  | 1078 | 119.3 | 4.87  |
| P60122   | RuvB-like 1 OS=Mus musculus GN=Ruvbl1 PE=1 SV=1 - [RUVB1_MOUSE]                                                                   | 50.44 | 3 | 17 | 17 | 90  | 0.949 | 1.169 | 0.845 | 0.998 | 290.42 | 50.44 | 29 | 90  | 456  | 50.2  | 6.42  |
| Q684R7-2 | Isoform 2 of FRAS1-related extracellular matrix protein 1 OS=Mus musculus GN=Frem1 - [FREM1_MOUSE]                                | 4.19  | 4 | 3  | 3  | 7   | 0.641 | 1.101 | 0.909 | 0.998 | 6.46   | 4.19  | 3  | 7   | 2172 | 242.4 | 6.38  |
| B1AT19   | Growth arrest-specific protein 7 OS=Mus musculus GN=Gas7 PE=4 SV=1 - [B1AT19_MOUSE]                                               | 47.57 | 4 | 18 | 19 | 99  | 1.236 | 1.464 | 1.894 | 0.998 | 277.02 | 47.57 | 33 | 99  | 412  | 47.2  | 7.59  |
| Q921J2   | GTP-binding protein Rheb OS=Mus musculus GN=Rheb PE=1 SV=1 - [RHEB_MOUSE]                                                         | 41.85 | 1 | 9  | 9  | 41  | 0.655 | 1.071 | 0.897 | 0.998 | 117.75 | 41.85 | 16 | 41  | 184  | 20.4  | 5.92  |
| F6WKE4   | Epsilon-sarcoglycan (Fragment) OS=Mus musculus GN=Scce PE=2 SV=1 - [F6WKE4_MOUSE]                                                 | 9.49  | 8 | 3  | 3  | 11  | 1.149 | 1.208 | 0.991 | 0.998 | 21.55  | 9.49  | 6  | 11  | 411  | 46.4  | 6.24  |
| Q9EPC2   | Fibroblast growth factor 23 OS=Mus musculus GN=Fgf23 PE=1 SV=1 - [FGF23_MOUSE]                                                    | 11.95 | 1 | 2  | 2  | 4   | 2.546 | 0.851 | 1.006 | 0.998 | 6.41   | 11.95 | 2  | 4   | 251  | 27.7  | 9.45  |
| Q8B63-3  | Isoform 3 of AP-5 complex subunit mu-1 OS=Mus musculus GN=Ap5m1 - [AP5M1_MOUSE]                                                   | 7.49  | 3 | 2  | 2  | 3   | 1.580 | 1.099 | 1.690 | 0.999 | 6.23   | 7.49  | 3  | 3   | 307  | 34.3  | 8.34  |
| Q99KH8   | Serine/threonine-protein kinase 24 OS=Mus musculus GN=Sk24 PE=1 SV=1 - [STK24_MOUSE]                                              | 38.52 | 1 | 7  | 13 | 64  | 0.937 | 0.964 | 0.938 | 0.999 | 168.88 | 38.52 | 25 | 64  | 431  | 47.9  | 5.43  |
| Q8CDG3   | Deubiquitinating protein Vcpl135 OS=Mus musculus GN=Vcpl1 PE=2 SV=1 - [VCPL1_MOUSE]                                               | 34.26 | 2 | 35 | 35 | 121 | 0.836 | 0.979 | 1.187 | 0.999 | 349.12 | 34.26 | 62 | 121 | 1220 | 134.4 | 7.17  |
| P46414   | Cyclin-dependent kinase inhibitor 1B OS=Mus musculus GN=Cdkn1b PE=1 SV=2 - [CDKN1B_MOUSE]                                         | 45.69 | 1 | 6  | 6  | 46  | 1.994 | 1.015 | 1.293 | 0.999 | 139.63 | 45.69 | 12 | 46  | 197  | 22.2  | 7.02  |
| E0CYG3   | Sperm flagellar protein 2 OS=Mus musculus GN=Spef2 PE=2 SV=1 - [E0CYG3_MOUSE]                                                     | 4.29  | 7 | 5  | 6  | 12  | 1.237 | 1.472 | 1.007 | 0.999 | 28.21  | 4.29  | 7  | 12  | 1724 | 197.8 | 5.86  |
| Q91W43   | Glycine dehydrogenase [decarboxylating], mitochondrial OS=Mus musculus GN=Gldc PE=1 SV=1 - [GDCP_MOUSE]                           | 13.95 | 1 | 11 | 11 | 20  | 0.760 | 1.842 | 1.626 | 0.999 | 49.20  | 13.95 | 16 | 20  | 1025 | 113.2 | 7.56  |
| Q9D067-4 | Isoform 4 of Nuclear protein MDM1 OS=Mus musculus GN=Mdm1 - [MDM1_MOUSE]                                                          | 10.26 | 6 | 6  | 6  | 10  | 1.091 | 0.870 | 1.195 | 0.999 | 22.40  | 10.26 | 8  | 10  | 663  | 74.5  | 9.33  |
| Q8VEH5   | EPM2A-interacting protein 1 OS=Mus musculus GN=Epm2aip1 PE=2 SV=1 - [EPMIP_MOUSE]                                                 | 33.83 | 1 | 19 | 19 | 64  | 0.695 | 1.282 | 1.008 | 0.999 | 183.14 | 33.83 | 32 | 64  | 606  | 70.1  | 5.87  |
| B1AY10   | Transcriptional repressor NF-X1 OS=Mus musculus GN=Nfx1 PE=2 SV=1 - [NFX1_MOUSE]                                                  | 7.09  | 3 | 8  | 8  | 19  | 1.057 | 0.697 | 1.103 | 0.999 | 45.49  | 7.09  | 12 | 19  | 1114 | 123.7 | 8.31  |
| Q924C1   | Exportin-5 OS=Mus musculus GN=Xpo5 PE=2 SV=1 - [XPO5_MOUSE]                                                                       | 16.28 | 3 | 18 | 18 | 79  | 0.736 | 1.023 | 0.810 | 0.999 | 202.41 | 16.28 | 31 | 79  | 1204 | 136.9 | 5.82  |
| Q8BTW3   | Exosome complex component MTR3 OS=Mus musculus GN=Exosc6 PE=1 SV=1 - [EXOS6_MOUSE]                                                | 12.82 | 1 | 3  | 3  | 6   | 0.807 | 0.932 | 0.914 | 0.999 | 14.83  | 12.82 | 5  | 6   | 273  | 28.4  | 6.11  |
| Q8BTI9   | Phosphatidylinositol 4,5-bisphosphate 3-kinase catalytic subunit beta isoform OS=Mus musculus GN=Plk3cb PE=1 SV=2 - [PK3CB_MOUSE] | 9.40  | 1 | 8  | 9  | 17  | 1.306 | 1.059 | 1.045 | 0.999 | 52.96  | 9.40  | 13 | 17  | 1064 | 121.6 | 7.09  |

|          |                                                                                                                 |       |   |    |    |     |       |       |       |       |         |       |     |     |      |       |      |
|----------|-----------------------------------------------------------------------------------------------------------------|-------|---|----|----|-----|-------|-------|-------|-------|---------|-------|-----|-----|------|-------|------|
| Q62356   | Follistatin-related protein 1 OS=Mus musculus GN=Fstl1 PE=1 SV=2 - [FSTL1_MOUSE]                                | 7.84  | 1 | 2  | 2  | 4   | 3.324 | 0.494 | 0.907 | 0.999 | 14.08   | 7.84  | 4   | 4   | 306  | 34.5  | 5.85 |
| Q8C6M1   | Ubiquitin carboxyl-terminal hydrolase 20 OS=Mus musculus GN=Usp20 PE=1 SV=1 - [UBP20_MOUSE]                     | 13.43 | 3 | 11 | 11 | 20  | 0.826 | 0.990 | 0.947 | 0.999 | 51.25   | 13.43 | 17  | 20  | 916  | 102.1 | 6.16 |
| E0CYH4   | WD repeat-containing protein 26 OS=Mus musculus GN=Wdr26 PE=2 SV=1 -                                            | 24.48 | 5 | 13 | 13 | 38  | 1.074 | 1.186 | 1.010 | 0.999 | 121.90  | 24.48 | 24  | 38  | 625  | 68.8  | 6.15 |
| D3YX13   | Inhibitor of growth protein 3 (Fragment) OS=Mus musculus GN=Ing3 PE=2 SV=1 - [D3YX13_MOUSE]                     | 6.06  | 3 | 2  | 2  | 3   | 1.607 | 1.074 | 1.200 | 0.999 | 4.94    | 6.06  | 3   | 3   | 264  | 29.5  | 6.35 |
| F6RJV6   | LanC-like protein 2 (Fragment) OS=Mus musculus GN=Lanc2 PE=2 SV=1 -                                             | 51.25 | 2 | 16 | 16 | 69  | 0.674 | 1.382 | 0.970 | 0.999 | 211.11  | 51.25 | 29  | 69  | 441  | 49.7  | 7.14 |
| H3BLS1   | Retrotransposon-derived protein PEG10 (Fragment) OS=Mus musculus GN=Peg10 PE=2 SV=1 - [H3BLS1_MOUSE]            | 8.40  | 4 | 2  | 2  | 3   | 1.218 | 1.308 | 0.897 | 0.999 | 6.72    | 8.40  | 3   | 3   | 369  | 41.7  | 4.67 |
| Q6PD28   | Protein Ppp2r5b OS=Mus musculus GN=Ppp2r5b PE=2 SV=1 - [Q6PD28_MOUSE]                                           | 38.23 | 1 | 13 | 15 | 63  | 0.551 | 0.747 | 0.964 | 0.999 | 201.77  | 38.23 | 27  | 63  | 497  | 57.3  | 6.84 |
| Q8K0T0   | Reticulon-1 OS=Mus musculus GN=Rtn1 PE=1 SV=1 - [RTN1_MOUSE]                                                    | 52.56 | 1 | 19 | 26 | 223 | 1.194 | 1.467 | 1.750 | 0.999 | 572.07  | 52.56 | 49  | 223 | 780  | 83.5  | 4.58 |
| P39053-4 | Isoform 4 of Dynamin-1 OS=Mus musculus GN=Dnm1 - [DYN1_MOUSE]                                                   | 78.13 | 9 | 6  | 62 | 960 | 0.539 | 1.793 | 1.074 | 0.999 | 2507.64 | 78.13 | 113 | 960 | 864  | 97.4  | 7.17 |
| F8VQ70   | Protein Scaper OS=Mus musculus GN=Scaper PE=2 SV=1 - [F8VQ70_MOUSE]                                             | 4.58  | 1 | 6  | 6  | 8   | 0.889 | 0.766 | 1.050 | 0.999 | 17.49   | 4.58  | 7   | 8   | 1398 | 157.7 | 7.31 |
| P50427   | Steryl-sulfatase OS=Mus musculus GN=Sts PE=2 SV=1 - [STS_MOUSE]                                                 | 4.65  | 1 | 2  | 3  | 4   | 0.875 | 0.649 | 0.980 | 0.999 | 8.00    | 4.65  | 4   | 4   | 624  | 66.5  | 8.50 |
| Q99MN1   | Lysine-tRNA ligase OS=Mus musculus GN=Kars PE=1 SV=1 - [SYK_MOUSE]                                              | 40.50 | 2 | 23 | 24 | 139 | 0.820 | 0.884 | 0.914 | 1.000 | 344.22  | 40.50 | 45  | 139 | 595  | 67.8  | 5.94 |
| Q8VFC3   | Olfactory receptor 266 OS=Mus musculus GN=Olfr266 PE=2 SV=1 - [Q8VFC3_MOUSE]                                    | 10.13 | 1 | 1  | 1  | 5   | 1.520 | 2.178 | 1.573 | 1.000 | 0.00    | 10.13 | 1   | 5   | 316  | 35.6  | 8.07 |
| Q9WTS4   | Teneurin-1 OS=Mus musculus GN=Tenm1 PE=1 SV=1 - [TEN1_MOUSE]                                                    | 9.45  | 3 | 20 | 22 | 46  | 0.912 | 1.242 | 0.987 | 1.000 | 139.44  | 9.45  | 37  | 46  | 2731 | 305.6 | 6.37 |
| E9Q4T0   | Holliday junction recognition protein OS=Mus musculus GN=Hjrp PE=2 SV=1 -                                       | 4.57  | 6 | 2  | 2  | 6   | 1.480 | 0.643 | 0.880 | 1.000 | 21.24   | 4.57  | 3   | 6   | 591  | 65.7  | 9.63 |
| P63318   | Protein kinase C gamma type OS=Mus musculus GN=Prkg PE=1 SV=1 - [KPCG_MOUSE]                                    | 46.48 | 2 | 25 | 28 | 210 | 0.661 | 1.553 | 1.511 | 1.000 | 581.33  | 46.48 | 49  | 210 | 697  | 78.3  | 7.46 |
| Q7TQG1   | Plectstrin homology domain-containing family A member 6 OS=Mus musculus GN=Plekha6 PE=1 SV=1 - [PLEKHA6_MOUSE]  | 24.21 | 2 | 20 | 21 | 73  | 1.147 | 0.594 | 1.123 | 1.000 | 206.46  | 24.21 | 34  | 73  | 1173 | 131.3 | 8.97 |
| Q8R180   | ERO1-like protein alpha OS=Mus musculus GN=Ero1 PE=1 SV=2 - [ERO1A_MOUSE]                                       | 17.89 | 2 | 8  | 8  | 32  | 0.685 | 1.689 | 0.733 | 1.000 | 99.30   | 17.89 | 15  | 32  | 464  | 54.1  | 6.54 |
| Q9CWW7   | CpG-binding protein OS=Mus musculus GN=Coxc1 PE=2 SV=1 - [CXXC1_MOUSE]                                          | 6.97  | 1 | 4  | 4  | 11  | 0.625 | 0.809 | 0.956 | 1.000 | 24.52   | 6.97  | 8   | 11  | 660  | 76.1  | 8.27 |
| Q8BRK8   | 5'-AMP-activated protein kinase catalytic subunit alpha-2 OS=Mus musculus GN=Prkaa2 PE=1 SV=3 - [AAPK2_MOUSE]   | 20.29 | 1 | 5  | 9  | 34  | 0.786 | 0.926 | 1.350 | 1.000 | 119.56  | 20.29 | 16  | 34  | 552  | 62.0  | 7.87 |
| Q9R110   | Sterol-4-alpha-carboxylate 3-dehydrogenase, decarboxylating OS=Mus musculus GN=Nsdh1 PE=2 SV=1 - [NSDH1_MOUSE]  | 29.01 | 1 | 9  | 9  | 27  | 1.133 | 0.673 | 0.784 | 1.000 | 94.99   | 29.01 | 15  | 27  | 362  | 40.7  | 7.85 |
| Q91XM9-7 | Isoform 7 of Disks large homolog 2 OS=Mus musculus GN=Dlg2 - [DLG2_MOUSE]                                       | 49.39 | 9 | 31 | 39 | 240 | 0.975 | 1.633 | 1.620 | 1.000 | 726.31  | 49.39 | 70  | 240 | 976  | 109.2 | 6.28 |
| Q9Z140   | Copine-6 OS=Mus musculus GN=Cpne6 PE=1 SV=1 - [CPNE6_MOUSE]                                                     | 55.30 | 3 | 23 | 24 | 190 | 0.877 | 2.513 | 1.212 | 1.000 | 558.26  | 55.30 | 42  | 190 | 557  | 61.7  | 5.59 |
| Q8C008   | Double zinc ribbon and ankyrin repeat-containing protein 1 OS=Mus musculus GN=Dzank1 PE=1 SV=2 - [DZANK1_MOUSE] | 31.11 | 2 | 20 | 20 | 53  | 0.898 | 0.744 | 0.974 | 1.000 | 172.96  | 31.11 | 33  | 53  | 778  | 85.0  | 8.18 |
| Q8C1B6   | Transmembrane protein 230 OS=Mus musculus GN=Tmem230 PE=1 SV=1 - [TM230_MOUSE]                                  | 20.83 | 1 | 2  | 2  | 10  | 0.953 | 0.937 | 0.953 | 1.000 | 30.15   | 20.83 | 4   | 10  | 120  | 13.2  | 9.31 |
| Q9D832   | DnaJ homolog subfamily B member 4 OS=Mus musculus GN=Dnajb4 PE=2 SV=1 -                                         | 49.55 | 1 | 12 | 13 | 48  | 1.019 | 1.020 | 1.047 | 1.000 | 173.56  | 49.55 | 20  | 48  | 337  | 37.8  | 8.59 |

|          |                                                                                                                   |       |   |    |    |     |       |       |       |       |        |       |    |     |      |       |       |
|----------|-------------------------------------------------------------------------------------------------------------------|-------|---|----|----|-----|-------|-------|-------|-------|--------|-------|----|-----|------|-------|-------|
| Q9ER67   | Maged2 protein OS=Mus musculus GN=Maged2 PE=2 SV=1 - [Q9ER67_MOUSE]                                               | 14.94 | 5 | 7  | 9  | 30  | 1.085 | 0.827 | 0.705 | 1.000 | 95.82  | 14.94 | 14 | 30  | 616  | 65.4  | 9.14  |
| G3X9Y5   | Protein Ube4a OS=Mus musculus GN=Ube4a PE=4 SV=1 - [G3X9Y5_MOUSE]                                                 | 15.58 | 3 | 15 | 16 | 39  | 0.744 | 0.834 | 0.888 | 1.000 | 110.05 | 15.58 | 27 | 39  | 1085 | 124.4 | 5.19  |
| Q9CQS2   | H/ACA ribonucleoprotein complex subunit 3 OS=Mus musculus GN=Nop10 PE=3 SV=1 - [NOP10_MOUSE]                      | 20.31 | 1 | 1  | 1  | 3   | 0.817 | 0.724 | 0.782 | 1.001 | 10.21  | 20.31 | 2  | 3   | 64   | 7.7   | 9.99  |
| Q9ESL4   | Mitogen-activated protein kinase kinase kinase MLT OS=Mus musculus GN=Mltk PE=1 SV=1 - [MLTK_MOUSE]               | 7.23  | 3 | 1  | 4  | 5   | 1.739 | 1.460 | 1.107 | 1.001 | 10.81  | 7.23  | 5  | 5   | 802  | 91.7  | 7.74  |
| D3YUW7   | Cingulin OS=Mus musculus GN=Cgn PE=2 SV=1 - [D3YUW7_MOUSE]                                                        | 14.10 | 4 | 14 | 15 | 26  | 1.382 | 0.859 | 0.849 | 1.001 | 58.13  | 14.10 | 21 | 26  | 1184 | 135.7 | 5.86  |
| Q7TPQ3-2 | Isoform 2 of E3 ubiquitin-protein ligase SHPRH OS=Mus musculus GN=Shprh -                                         | 2.85  | 4 | 4  | 4  | 4   | 0.614 | 1.192 | 0.962 | 1.001 | 5.04   | 2.85  | 4  | 4   | 1616 | 185.0 | 7.53  |
| Q9DC28   | Casein kinase I isoform delta OS=Mus musculus GN=Csk1d PE=1 SV=2 - [KC1D_MOUSE]                                   | 30.36 | 5 | 6  | 12 | 53  | 1.204 | 0.775 | 0.958 | 1.001 | 135.45 | 30.36 | 21 | 53  | 415  | 47.3  | 9.74  |
| Q9CWT6   | Probable ATP-dependent RNA helicase DDX28 OS=Mus musculus GN=Ddx28 PE=2 SV=2 - [DDX28_MOUSE]                      | 1.85  | 1 | 1  | 1  | 1   | 1.172 | 0.792 | 1.099 | 1.001 | 1.84   | 1.85  | 1  | 1   | 540  | 59.5  | 10.04 |
| B1AV20   | Uracil phosphoribosyltransferase homolog OS=Mus musculus GN=Uprt PE=2 SV=1 - [UPP_MOUSE]                          | 38.06 | 1 | 9  | 9  | 30  | 1.498 | 1.097 | 1.033 | 1.001 | 77.50  | 38.06 | 18 | 30  | 310  | 34.3  | 6.23  |
| Q8BHG2   | UPF0587 protein Clorf123 homolog OS=Mus musculus PE=2 SV=1 - [CA123_MOUSE]                                        | 68.13 | 9 | 8  | 8  | 29  | 1.744 | 0.969 | 1.215 | 1.001 | 85.96  | 68.13 | 13 | 29  | 160  | 18.0  | 5.12  |
| Q9R1T2   | SUMO-activating enzyme subunit 1 OS=Mus musculus GN=Sae1 PE=2 SV=1 - [SAE1_MOUSE]                                 | 48.00 | 2 | 13 | 13 | 38  | 0.818 | 1.027 | 0.914 | 1.001 | 94.05  | 48.00 | 24 | 38  | 350  | 38.6  | 5.36  |
| A2ABW9   | CDK5 and ABL1 enzyme substrate 2 OS=Mus musculus GN=Cables2 PE=2 SV=1 -                                           | 6.51  | 2 | 2  | 2  | 3   | 1.020 | 1.193 | 1.020 | 1.001 | 4.38   | 6.51  | 2  | 3   | 476  | 52.0  | 9.86  |
| F8W164   | Vacuolar protein sorting-associated protein 8 homolog OS=Mus musculus GN=Vps8 PE=4 SV=2 - [F8W164_MOUSE]          | 12.65 | 9 | 14 | 14 | 25  | 0.934 | 1.003 | 0.998 | 1.001 | 56.96  | 12.65 | 22 | 25  | 1399 | 157.9 | 5.60  |
| Q9DC61   | Mitochondrial-processing peptidase subunit alpha OS=Mus musculus GN=Pmpca PE=1 SV=1 - [MPPA_MOUSE]                | 28.44 | 2 | 15 | 15 | 46  | 0.882 | 1.096 | 0.934 | 1.001 | 142.03 | 28.44 | 27 | 46  | 524  | 58.2  | 6.83  |
| Q61EE6   | Transmembrane protein 132E OS=Mus musculus GN=Tmem132e PE=2 SV=1 - [T132E_MOUSE]                                  | 13.14 | 1 | 10 | 10 | 18  | 1.125 | 1.117 | 1.049 | 1.001 | 53.31  | 13.14 | 16 | 18  | 982  | 106.9 | 6.04  |
| Q9EP69   | Phosphatidylinositol phosphatase SAC1 OS=Mus musculus GN=Sacm1l PE=2 SV=1 - [SAC1_MOUSE]                          | 33.73 | 1 | 18 | 18 | 88  | 0.694 | 0.679 | 0.872 | 1.001 | 266.94 | 33.73 | 34 | 88  | 587  | 66.9  | 7.30  |
| H3BJZ7   | Protein unc-13 homolog B OS=Mus musculus GN=Unc13a PE=2 SV=1 - [H3BJZ7_MOUSE]                                     | 27.09 | 4 | 19 | 39 | 124 | 0.610 | 1.476 | 1.234 | 1.001 | 348.37 | 27.09 | 66 | 124 | 1731 | 195.7 | 5.26  |
| Q3UYV9   | Nuclear cap-binding protein subunit 1 OS=Mus musculus GN=Ncbp1 PE=1 SV=2 - [NCBP1_MOUSE]                          | 13.42 | 1 | 8  | 8  | 20  | 0.921 | 0.991 | 0.918 | 1.001 | 55.61  | 13.42 | 12 | 20  | 790  | 91.9  | 6.64  |
| Q62276-2 | Isoform 2 of Mediator of RNA polymerase II transcription subunit 22 OS=Mus musculus GN=Med22 -                    | 19.29 | 3 | 2  | 2  | 3   | 1.604 | 1.561 | 0.848 | 1.001 | 12.06  | 19.29 | 3  | 3   | 140  | 16.4  | 5.02  |
| P04117   | Fatty acid-binding protein, adipocyte OS=Mus musculus GN=Fabp4 PE=1 SV=3 - [FABP4_MOUSE]                          | 22.73 | 3 | 3  | 3  | 11  | 7.715 | 2.713 | 0.556 | 1.001 | 22.34  | 22.73 | 6  | 11  | 132  | 14.6  | 8.40  |
| Q6PHZ5   | Putative RNA-binding protein 15B OS=Mus musculus GN=Rbm15b PE=1 SV=2 -                                            | 5.64  | 1 | 5  | 7  | 7   | 0.776 | 0.811 | 1.119 | 1.001 | 12.84  | 5.64  | 7  | 7   | 887  | 97.0  | 9.91  |
| Q3B7Z2   | Oxysterol-binding protein 1 OS=Mus musculus GN=Osbp PE=1 SV=3 - [OSBP1_MOUSE]                                     | 32.92 | 2 | 18 | 21 | 84  | 0.939 | 0.943 | 1.052 | 1.001 | 246.34 | 32.92 | 37 | 84  | 805  | 88.7  | 7.20  |
| Q5SUQ9   | CST complex subunit CTC1 OS=Mus musculus GN=Ctc1 PE=1 SV=2 - [CTC1_MOUSE]                                         | 9.57  | 2 | 1  | 9  | 21  | 0.501 | 0.989 | 0.630 | 1.001 | 77.65  | 9.57  | 15 | 21  | 1212 | 133.9 | 8.12  |
| Q8BL97-3 | Isoform 3 of Serine/arginine-rich splicing factor 7 OS=Mus musculus GN=Srsf7 -                                    | 37.58 | 4 | 5  | 6  | 28  | 0.970 | 0.935 | 0.889 | 1.001 | 64.07  | 37.58 | 11 | 28  | 157  | 17.9  | 9.47  |
| Q9JME7   | Trafficking protein particle complex subunit 2-like protein OS=Mus musculus GN=Trappc2l PE=2 SV=1 - [TPC2L_MOUSE] | 41.73 | 1 | 5  | 5  | 16  | 0.785 | 1.006 | 1.021 | 1.002 | 50.66  | 41.73 | 9  | 16  | 139  | 16.0  | 6.77  |

|          |                                                                                                                                                                                                             |       |   |    |    |     |       |       |       |       |        |       |    |     |      |       |      |
|----------|-------------------------------------------------------------------------------------------------------------------------------------------------------------------------------------------------------------|-------|---|----|----|-----|-------|-------|-------|-------|--------|-------|----|-----|------|-------|------|
| A2AJW5   | Uncharacterized protein<br>OS=Mus musculus<br>GN=Fam217b PE=4 SV=1 -<br>[A2AJW5_MOUSE]                                                                                                                      | 13.95 | 1 | 4  | 4  | 18  | 1.188 | 1.197 | 1.406 | 1.002 | 44.05  | 13.95 | 7  | 18  | 387  | 42.1  | 9.45 |
| Q5SX19   | N-acetylglucosaminyl-<br>phosphatidylinositol de-N-<br>acetylase OS=Mus<br>musculus GN=Pigl PE=2<br>SV=1 - [PIGL_MOUSE]                                                                                     | 5.16  | 1 | 1  | 1  | 3   | 0.992 | 1.083 | 0.951 | 1.002 | 4.89   | 5.16  | 2  | 3   | 252  | 28.2  | 8.34 |
| Q80TE4-2 | Isoform 2 of Signal-<br>induced proliferation-<br>associated 1-like protein 2<br>OS=Mus musculus<br>GN=Sipa112 -<br>[SIPA112_MOUSE]<br>Synembryn-B OS=Mus<br>musculus GN=Ric8b PE=1<br>SV=2 - [RIC8B_MOUSE] | 10.22 | 2 | 14 | 17 | 37  | 1.081 | 0.608 | 0.963 | 1.002 | 84.75  | 10.22 | 28 | 37  | 1703 | 187.2 | 6.95 |
| Q80XE1   | Synembryn-B OS=Mus<br>musculus GN=Ric8b PE=1<br>SV=2 - [RIC8B_MOUSE]                                                                                                                                        | 11.92 | 5 | 3  | 6  | 16  | 1.116 | 1.238 | 0.881 | 1.002 | 43.42  | 11.92 | 9  | 16  | 520  | 58.6  | 5.72 |
| Q3T9A5   | Glomulin OS=Mus<br>musculus GN=Glmn PE=2<br>SV=1 - [Q3T9A5_MOUSE]                                                                                                                                           | 5.08  | 2 | 3  | 3  | 7   | 0.798 | 0.822 | 0.625 | 1.002 | 14.11  | 5.08  | 5  | 7   | 532  | 60.6  | 5.05 |
| Q9CZ44   | NSFL1 cofactor p47<br>OS=Mus musculus<br>GN=Nsf1c PE=1 SV=1 -<br>[NSF1C_MOUSE]                                                                                                                              | 41.08 | 4 | 15 | 15 | 182 | 2.072 | 1.235 | 1.163 | 1.002 | 553.24 | 41.08 | 28 | 182 | 370  | 40.7  | 5.15 |
| Q9D1M4   | Eukaryotic translation<br>elongation factor 1 epsilon-<br>1 OS=Mus musculus<br>GN=Eef1e1 PE=2 SV=1 -<br>[MCA3_MOUSE]                                                                                        | 38.51 | 1 | 6  | 6  | 17  | 1.589 | 1.345 | 0.816 | 1.002 | 35.58  | 38.51 | 10 | 17  | 174  | 19.8  | 8.59 |
| Q80U35   | Rho guanine nucleotide<br>exchange factor 17<br>OS=Mus musculus<br>GN=Argef17 PE=1 SV=2 -<br>[ARHG1_MOUSE]                                                                                                  | 14.88 | 2 | 15 | 17 | 34  | 0.916 | 0.916 | 0.852 | 1.002 | 80.80  | 14.88 | 24 | 34  | 2057 | 221.5 | 6.30 |
| P62700   | Protein yippep-like 5<br>OS=Mus musculus<br>GN=Ype15 PE=2 SV=1 -<br>[YPE15_MOUSE]                                                                                                                           | 23.97 | 1 | 3  | 3  | 6   | 2.494 | 1.332 | 0.992 | 1.002 | 12.46  | 23.97 | 6  | 6   | 121  | 13.8  | 7.31 |
| Q9WNT0   | Geranylgeranyl<br>pyrophosphate synthase<br>OS=Mus musculus<br>GN=Ggps1 PE=2 SV=1 -<br>[GPPS_MOUSE]                                                                                                         | 32.00 | 1 | 9  | 9  | 23  | 0.671 | 1.015 | 0.812 | 1.002 | 63.90  | 32.00 | 15 | 23  | 300  | 34.7  | 6.46 |
| Q9D1C9   | Ribosomal RNA-processing<br>protein 7 homolog A<br>OS=Mus musculus<br>GN=Rrp7a PE=2 SV=1 -<br>[RRP7A_MOUSE]                                                                                                 | 9.29  | 4 | 2  | 2  | 2   | 0.920 | 1.283 | 0.589 | 1.002 | 2.88   | 9.29  | 2  | 2   | 280  | 32.4  | 9.48 |
| Q9DBG1   | Sterol 26-hydroxylase,<br>mitochondrial OS=Mus<br>musculus GN=Cyp27a1<br>PE=1 SV=1 -<br>[CP27A_MOUSE]                                                                                                       | 10.13 | 1 | 3  | 3  | 8   | 1.036 | 1.100 | 0.983 | 1.002 | 16.99  | 10.13 | 5  | 8   | 533  | 60.7  | 9.14 |
| Q9WU00   | Lysine-specific<br>demethylase PHF2<br>OS=Mus musculus<br>GN=Phf2 PE=1 SV=2 -<br>[PHF2_MOUSE]                                                                                                               | 5.75  | 4 | 4  | 5  | 6   | 0.893 | 0.962 | 0.963 | 1.002 | 15.24  | 5.75  | 6  | 6   | 1096 | 120.7 | 9.17 |
| Q9D1E6   | Tubulin-folding cofactor B<br>OS=Mus musculus<br>GN=Tcbp PE=1 SV=2 -<br>[TBCB_MOUSE]                                                                                                                        | 33.61 | 1 | 7  | 7  | 41  | 1.747 | 0.710 | 0.860 | 1.002 | 133.63 | 33.61 | 14 | 41  | 244  | 27.4  | 5.24 |
| Q61140   | Breast cancer anti-<br>estrogen resistance<br>protein 1 OS=Mus<br>musculus GN=Bcar1 PE=1<br>SV=2 - [BCAR1_MOUSE]                                                                                            | 33.64 | 2 | 19 | 19 | 71  | 1.654 | 1.119 | 1.051 | 1.002 | 211.89 | 33.64 | 31 | 71  | 874  | 94.2  | 5.68 |
| E9PWJ0   | CUB and sushi domain-<br>containing protein 3<br>OS=Mus musculus<br>GN=Csm3 PE=2 SV=1 -<br>[E9PWJ0_MOUSE]                                                                                                   | 3.84  | 4 | 10 | 11 | 21  | 1.044 | 1.354 | 1.143 | 1.002 | 55.52  | 3.84  | 17 | 21  | 3538 | 386.9 | 5.91 |
| Q9QWK4   | CD5 antigen-like OS=Mus<br>musculus GN=Cd5l PE=1<br>SV=3 - [CD5L_MOUSE]                                                                                                                                     | 3.13  | 1 | 1  | 1  | 4   | 2.154 | 1.607 | 0.796 | 1.003 | 11.40  | 3.13  | 2  | 4   | 352  | 38.8  | 5.16 |
| Q9QYJ0   | DnaJ homolog subfamily A<br>member 2 OS=Mus<br>musculus GN=Dnaja2<br>PE=1 SV=1 -<br>[DNAJA2_MOUSE]                                                                                                          | 66.02 | 1 | 23 | 23 | 122 | 0.973 | 0.950 | 1.076 | 1.003 | 294.97 | 66.02 | 41 | 122 | 412  | 45.7  | 6.48 |
| Q6ZPK7   | Lateral signaling target<br>protein 2 homolog<br>OS=Mus musculus<br>GN=Zfyve28 PE=1 SV=2 -<br>[LST2_MOUSE]                                                                                                  | 3.98  | 3 | 3  | 3  | 7   | 0.960 | 0.979 | 1.290 | 1.003 | 19.20  | 3.98  | 5  | 7   | 905  | 99.7  | 5.10 |
| A2A763   | Nuclear transcription factor<br>Y subunit gamma<br>(Fragment) OS=Mus<br>musculus GN=Nfyc PE=2<br>SV=1 - [A2A763_MOUSE]                                                                                      | 27.55 | 4 | 3  | 3  | 4   | 1.137 | 1.398 | 0.530 | 1.003 | 10.76  | 27.55 | 4  | 4   | 98   | 11.4  | 5.60 |
| P68037   | Ubiquitin-conjugating<br>enzyme E2 L3 OS=Mus<br>musculus GN=Ube2l3<br>PE=2 SV=1 -<br>[UBE2L3_MOUSE]                                                                                                         | 46.10 | 2 | 5  | 5  | 31  | 0.823 | 0.727 | 0.955 | 1.003 | 106.39 | 46.10 | 10 | 31  | 154  | 17.9  | 8.51 |
| Q8B342   | Disks large-associated<br>protein 2 OS=Mus<br>musculus GN=Dlgap2<br>PE=1 SV=2 -<br>[DLGAP2_MOUSE]                                                                                                           | 27.95 | 3 | 20 | 27 | 113 | 0.877 | 1.967 | 2.618 | 1.003 | 319.34 | 27.95 | 46 | 113 | 1059 | 119.0 | 6.81 |
| Q99JY9   | Actin-related protein 3<br>OS=Mus musculus<br>GN=Actr3 PE=1 SV=3 -<br>[ARP3_MOUSE]                                                                                                                          | 82.30 | 1 | 20 | 24 | 280 | 0.653 | 1.328 | 1.021 | 1.003 | 773.73 | 82.30 | 42 | 280 | 418  | 47.3  | 5.88 |
| D3Z5J3   | Sorbin and SH3 domain-<br>containing protein 1<br>OS=Mus musculus<br>GN=Sorbs1 PE=2 SV=1 -<br>[D3Z5J3_MOUSE]                                                                                                | 34.75 | 2 | 5  | 27 | 128 | 2.125 | 0.545 | 1.332 | 1.003 | 381.49 | 34.75 | 49 | 128 | 938  | 103.9 | 5.94 |



|          |                                                                                                                      |       |   |    |    |     |       |       |       |       |        |       |    |     |      |       |       |
|----------|----------------------------------------------------------------------------------------------------------------------|-------|---|----|----|-----|-------|-------|-------|-------|--------|-------|----|-----|------|-------|-------|
| P45952   | Medium-chain specific acyl-CoA dehydrogenase, mitochondrial OS=Mus musculus GN=Acadm PE=1 SV=1 - [P45952_MOUSE]      | 42.52 | 2 | 15 | 15 | 66  | 0.922 | 1.103 | 0.829 | 1.003 | 191.35 | 42.52 | 28 | 66  | 421  | 46.5  | 8.37  |
| A2ARZ3   | Fibrous sheath-interacting protein 2 OS=Mus musculus GN=Fsp2 PE=1 SV=3 - [FSIP2_MOUSE]                               | 1.54  | 2 | 8  | 12 | 36  | 1.581 | 1.760 | 1.979 | 1.003 | 64.92  | 1.54  | 16 | 36  | 6995 | 784.4 | 6.51  |
| Q9CQW1   | Synaptobrevin homolog YKT6 OS=Mus musculus GN=Ykt6 PE=2 SV=1 - [YKT6_MOUSE]                                          | 53.03 | 1 | 9  | 9  | 48  | 0.734 | 0.947 | 0.961 | 1.003 | 141.27 | 53.03 | 18 | 48  | 198  | 22.3  | 6.35  |
| Q60607   | BRK-1T OS=Mus musculus GN=Bmpr1a PE=2 SV=1 - [Q60607_MOUSE]                                                          | 12.60 | 2 | 3  | 4  | 10  | 0.665 | 0.752 | 0.738 | 1.003 | 31.63  | 12.60 | 7  | 10  | 500  | 56.4  | 6.71  |
| Q9CQV5   | 28S ribosomal protein S24, mitochondrial OS=Mus musculus GN=Mrps24 PE=2 SV=1 - [RT24_MOUSE]                          | 13.77 | 1 | 3  | 3  | 5   | 0.632 | 0.665 | 1.003 | 1.003 | 13.83  | 13.77 | 5  | 5   | 167  | 18.9  | 9.76  |
| P61161   | Actin-related protein 2 OS=Mus musculus GN=Actr2 PE=1 SV=1 - [ARP2_MOUSE]                                            | 50.51 | 1 | 16 | 16 | 144 | 0.698 | 1.441 | 1.133 | 1.003 | 501.57 | 50.51 | 27 | 144 | 394  | 44.7  | 6.74  |
| A2A8U2-2 | Isoform Samp1 of Transmembrane protein 201 OS=Mus musculus GN=Them201 - [A2A8U2_MOUSE]                               | 15.82 | 3 | 3  | 3  | 8   | 1.044 | 1.716 | 0.848 | 1.003 | 11.68  | 15.82 | 4  | 8   | 392  | 43.5  | 8.56  |
| A2AHB7   | Potassium channel subfamily T member 1 OS=Mus musculus GN=Kcnt1 PE=2 SV=1 - [A2AHB7_MOUSE]                           | 7.89  | 6 | 7  | 7  | 21  | 1.067 | 0.895 | 0.906 | 1.003 | 63.18  | 7.89  | 13 | 21  | 1217 | 137.3 | 7.46  |
| P43024   | Cytochrome c oxidase subunit 6A1, mitochondrial OS=Mus musculus GN=Cox6a1 PE=1 SV=2 - [CX6A1_MOUSE]                  | 40.54 | 2 | 2  | 2  | 14  | 0.600 | 0.780 | 1.049 | 1.003 | 46.08  | 40.54 | 3  | 14  | 111  | 12.3  | 9.98  |
| Q9QYS1   | Protein Wnt-16 OS=Mus musculus GN=Wnt16 PE=2 SV=2 - [WNT16_MOUSE]                                                    | 3.30  | 1 | 1  | 2  | 2   | 0.618 | 1.054 | 1.091 | 1.003 | 4.97   | 3.30  | 2  | 2   | 364  | 40.7  | 8.63  |
| E9PUA2   | Terminal uridylyltransferase 7 OS=Mus musculus GN=Zcchc6 PE=4 SV=1 - [E9PUA2_MOUSE]                                  | 6.85  | 2 | 5  | 8  | 10  | 1.365 | 0.931 | 1.249 | 1.004 | 22.22  | 6.85  | 10 | 10  | 1474 | 167.0 | 6.52  |
| O88351   | Inhibitor of nuclear factor kappa-B kinase subunit beta OS=Mus musculus GN=Ikkb PE=1 SV=1 - [IKKB_MOUSE]             | 10.04 | 4 | 6  | 6  | 11  | 0.773 | 1.488 | 1.000 | 1.004 | 33.05  | 10.04 | 8  | 11  | 757  | 86.6  | 6.40  |
| Q4UZR1-2 | Isoform 2 of E3 ubiquitin-protein ligase HERC2 OS=Mus musculus GN=Her2 - [Q4UZR1_MOUSE]                              | 7.71  | 6 | 26 | 31 | 50  | 0.869 | 0.802 | 0.878 | 1.004 | 129.55 | 7.71  | 47 | 50  | 4800 | 523.1 | 6.27  |
| Q8C1B1   | Calmodulin-regulated spectrin-associated protein 2 OS=Mus musculus GN=Camsap2 PE=1 SV=3 - [CAMP2_MOUSE]              | 24.09 | 9 | 27 | 29 | 93  | 1.085 | 1.004 | 1.303 | 1.004 | 248.97 | 24.09 | 46 | 93  | 1461 | 164.2 | 6.86  |
| Q61699-2 | Isoform HSP105-beta of Heat shock protein 105 kDa OS=Mus musculus GN=Hsph1 - [Q61699_MOUSE]                          | 55.65 | 5 | 38 | 43 | 348 | 1.017 | 1.073 | 1.089 | 1.004 | 966.52 | 55.65 | 78 | 348 | 814  | 91.6  | 5.74  |
| F7CGG2   | Transformation/transcription domain-associated protein (Fragment) OS=Mus musculus GN=Trap PE=4 SV=1 - [F7CGG2_MOUSE] | 6.19  | 5 | 17 | 18 | 29  | 0.682 | 1.081 | 0.875 | 1.004 | 67.31  | 6.19  | 25 | 29  | 3587 | 405.3 | 8.19  |
| Q8C050-2 | Isoform 1 of Ribosomal protein S6 kinase alpha-5 OS=Mus musculus GN=Rps6ka5 - [Q8C050_MOUSE]                         | 20.55 | 2 | 13 | 15 | 47  | 0.674 | 0.856 | 1.117 | 1.004 | 132.21 | 20.55 | 27 | 47  | 798  | 89.5  | 7.25  |
| Q9DCZ1   | GMP reductase 1 OS=Mus musculus GN=Gmpr PE=2 SV=1 - [GMPR1_MOUSE]                                                    | 37.39 | 2 | 9  | 11 | 43  | 1.664 | 0.724 | 0.994 | 1.004 | 133.47 | 37.39 | 20 | 43  | 345  | 37.5  | 7.09  |
| P97929   | Breast cancer type 2 susceptibility protein homolog OS=Mus musculus GN=Brca2 PE=1 SV=2 - [BRCA2_MOUSE]               | 2.40  | 1 | 6  | 6  | 6   | 0.718 | 0.877 | 0.908 | 1.004 | 9.71   | 2.40  | 6  | 6   | 3329 | 370.4 | 6.67  |
| Q9QZD4   | DNA repair endonuclease XPF OS=Mus musculus GN=Ercc4 PE=2 SV=3 - [XPF_MOUSE]                                         | 11.34 | 3 | 8  | 8  | 18  | 1.139 | 0.737 | 0.956 | 1.004 | 51.73  | 11.34 | 15 | 18  | 917  | 103.6 | 7.71  |
| Q504M2   | MCS53395 OS=Mus musculus GN=Pdp2 PE=2 SV=1 - [Q504M2_MOUSE]                                                          | 12.41 | 1 | 4  | 4  | 10  | 1.009 | 1.110 | 0.892 | 1.004 | 14.32  | 12.41 | 5  | 10  | 532  | 59.9  | 6.32  |
| Q91W27   | Tuberoinfundibular peptide of 39 residues OS=Mus musculus GN=Pth2 PE=1 SV=1 - [TIP39_MOUSE]                          | 18.00 | 1 | 2  | 2  | 6   | 1.198 | 1.179 | 0.758 | 1.004 | 15.59  | 18.00 | 3  | 6   | 100  | 11.0  | 11.28 |
| P70261   | Paladin OS=Mus musculus GN=Pal1 PE=1 SV=1 - [PALD_MOUSE]                                                             | 13.85 | 1 | 9  | 9  | 18  | 0.778 | 0.707 | 0.836 | 1.004 | 60.36  | 13.85 | 14 | 18  | 859  | 96.7  | 6.58  |
| Q9ESW4   | Acylglycerol kinase, mitochondrial OS=Mus musculus GN=Agk PE=1 SV=1 - [AGK_MOUSE]                                    | 55.34 | 2 | 19 | 19 | 93  | 0.705 | 0.936 | 0.943 | 1.004 | 254.59 | 55.34 | 34 | 93  | 421  | 46.9  | 8.40  |

|          |                                                                                                                                                                                                                                     |       |   |     |     |     |       |       |       |       |         |       |     |     |      |       |      |
|----------|-------------------------------------------------------------------------------------------------------------------------------------------------------------------------------------------------------------------------------------|-------|---|-----|-----|-----|-------|-------|-------|-------|---------|-------|-----|-----|------|-------|------|
| F6Y3V0   | Receptor-type tyrosine-protein phosphatase F (Fragment) OS=Mus musculus GN=Ptpfr PE=4 SV=1 - [F6Y3V0_MOUSE]                                                                                                                         | 32.69 | 1 | 3   | 31  | 104 | 1.084 | 0.959 | 0.896 | 1.004 | 305.21  | 32.69 | 54  | 104 | 1291 | 145.4 | 6.73 |
| E9Q0E9   | Ankyrin repeat domain-containing protein 55 OS=Mus musculus GN=Ankrd55 PE=2 SV=1 - [E9Q0E9_MOUSE]                                                                                                                                   | 2.68  | 2 | 1   | 1   | 5   | 0.914 | 0.592 | 0.709 | 1.004 | 10.98   | 2.68  | 2   | 5   | 598  | 65.4  | 7.44 |
| Q9ESC8   | AF4/FMR2 family member 4 OS=Mus musculus GN=AF4 PE=1 SV=1 - [AFF4_MOUSE]                                                                                                                                                            | 1.72  | 1 | 1   | 2   | 2   | 2.734 | 1.100 | 0.994 | 1.004 | 3.68    | 1.72  | 2   | 2   | 1160 | 126.6 | 9.36 |
| O08586   | Phosphatidylinositol 3,4,5-trisphosphate 3-phosphatase and dual-specificity protein phosphatase PTEEN OS=Mus musculus GN=Pten PE=1 SV=1 - Probable ATP-dependent RNA helicase DDX5 OS=Mus musculus GN=Ddx5 PE=1 SV=2 - [DDX5_MOUSE] | 23.08 | 1 | 8   | 8   | 37  | 0.623 | 0.857 | 0.951 | 1.004 | 109.96  | 23.08 | 16  | 37  | 403  | 47.1  | 6.37 |
| Q61656   | Isoform 1 of A-kinase anchor protein 1, mitochondrial OS=Mus musculus GN=Akap1 - [AKAP1_MOUSE]                                                                                                                                      | 45.93 | 5 | 24  | 32  | 157 | 0.625 | 0.711 | 0.947 | 1.004 | 448.89  | 45.93 | 58  | 157 | 614  | 69.2  | 8.92 |
| O08715-2 | Isoform 3 of Seizure 6-like protein 2 OS=Mus musculus GN=Sez6l2 - [SE6L2_MOUSE]                                                                                                                                                     | 35.85 | 6 | 13  | 13  | 38  | 1.302 | 0.951 | 1.220 | 1.004 | 115.59  | 35.85 | 22  | 38  | 544  | 57.6  | 4.94 |
| Q4V9Z5-3 | PH-interacting protein OS=Mus musculus GN=Phip PE=4 SV=1 - [FBVQ93_MOUSE]                                                                                                                                                           | 27.00 | 3 | 14  | 15  | 67  | 1.423 | 1.131 | 1.109 | 1.004 | 195.79  | 27.00 | 28  | 67  | 863  | 93.3  | 4.84 |
| F8VQ93   | Dedicator of cytokinesis protein 7 OS=Mus musculus GN=Dock7 PE=2 SV=1 - [A2A9M5_MOUSE]                                                                                                                                              | 1.70  | 3 | 2   | 3   | 6   | 0.603 | 1.114 | 0.913 | 1.004 | 15.19   | 1.70  | 4   | 6   | 1821 | 206.6 | 8.85 |
| A2A9M5   | Nck-associated protein 1 OS=Mus musculus GN=Nckap1 PE=2 SV=1 - [AZA598_MOUSE]                                                                                                                                                       | 17.67 | 7 | 25  | 28  | 70  | 0.708 | 1.039 | 0.887 | 1.004 | 207.36  | 17.67 | 51  | 70  | 2128 | 241.0 | 6.79 |
| A2A598   | Echinoderm microtubule-associated protein-like 2 OS=Mus musculus GN=Emi2 PE=2 SV=1 - [E9QK48_MOUSE]                                                                                                                                 | 41.27 | 3 | 42  | 44  | 258 | 0.512 | 1.356 | 1.123 | 1.004 | 662.90  | 41.27 | 81  | 258 | 1134 | 129.4 | 6.68 |
| E9QK48   | PRA1 family protein 2 OS=Mus musculus GN=Praf2 PE=2 SV=1 - [PRAF2_MOUSE]                                                                                                                                                            | 39.00 | 5 | 26  | 27  | 104 | 1.019 | 0.642 | 0.785 | 1.004 | 305.53  | 39.00 | 48  | 104 | 841  | 90.7  | 6.98 |
| Q9JIG8   | cAMP-dependent protein kinase catalytic subunit beta OS=Mus musculus GN=Prkacb PE=1 SV=2 - [KAPCB_MOUSE]                                                                                                                            | 26.97 | 1 | 4   | 4   | 11  | 0.779 | 0.842 | 1.005 | 1.004 | 28.64   | 26.97 | 7   | 11  | 178  | 19.5  | 9.60 |
| P68181   | Casein kinase I isoform gamma-1 OS=Mus musculus GN=Csnk1g1 PE=1 SV=2 - 28S ribosomal protein S36, mitochondrial OS=Mus musculus GN=Mrips36 PE=1 SV=1 - [RT36_MOUSE]                                                                 | 55.56 | 4 | 8   | 18  | 91  | 0.726 | 1.025 | 0.997 | 1.004 | 273.46  | 55.56 | 28  | 91  | 351  | 40.7  | 8.56 |
| Q8BTH8   | Isoform 2 of E3 ubiquitin-protein ligase DZIP3 OS=Mus musculus GN=Dzip3 - DNA-directed RNA polymerases I, II, and III subunit RPABC3 OS=Mus musculus GN=Polr2h PE=2 SV=3 - [RPAB3_MOUSE]                                            | 23.31 | 2 | 5   | 10  | 18  | 0.811 | 1.334 | 0.933 | 1.004 | 48.43   | 23.31 | 15  | 18  | 459  | 52.7  | 9.01 |
| Q9CQX8   | Isoform 2 of E3 ubiquitin-protein ligase DZIP3 OS=Mus musculus GN=Dzip3 - DNA-directed RNA polymerases I, II, and III subunit RPABC3 OS=Mus musculus GN=Polr2h PE=2 SV=3 - [RPAB3_MOUSE]                                            | 70.59 | 4 | 5   | 5   | 97  | 1.753 | 0.868 | 1.568 | 1.004 | 251.39  | 70.59 | 10  | 97  | 102  | 11.1  | 9.99 |
| Q7TPV2-2 | Isoform 2 of E3 ubiquitin-protein ligase DZIP3 OS=Mus musculus GN=Dzip3 - DNA-directed RNA polymerases I, II, and III subunit RPABC3 OS=Mus musculus GN=Polr2h PE=2 SV=3 - [RPAB3_MOUSE]                                            | 18.54 | 5 | 15  | 15  | 29  | 0.884 | 0.967 | 0.874 | 1.005 | 83.43   | 18.54 | 23  | 29  | 998  | 113.8 | 5.21 |
| Q923G2   | Isoform 7 of Regulating synaptic membrane exocytosis protein 1 OS=Mus musculus GN=Rims1 - Death domain-containing membrane protein NRADD OS=Mus musculus GN=Nradd PE=1 SV=1 - [NRADD_MOUSE]                                         | 32.67 | 1 | 3   | 3   | 9   | 1.258 | 1.134 | 0.899 | 1.005 | 28.15   | 32.67 | 5   | 9   | 150  | 17.1  | 4.68 |
| Q99NES-7 | CAAX box 1 homolog A (Human) OS=Mus musculus GN=Cox1b PE=4 SV=1 - [Q9D1F0_MOUSE]                                                                                                                                                    | 30.66 | 3 | 1   | 30  | 106 | 0.774 | 1.010 | 1.486 | 1.005 | 354.77  | 30.66 | 53  | 106 | 1184 | 132.9 | 9.33 |
| Q8CJ26   | F-box only protein 10 OS=Mus musculus GN=Fbxo10 PE=1 SV=2 - [FBX10_MOUSE]                                                                                                                                                           | 19.30 | 1 | 3   | 3   | 3   | 1.799 | 0.845 | 1.049 | 1.005 | 11.70   | 19.30 | 3   | 3   | 228  | 24.7  | 5.01 |
| Q9D1F0   | Receptor-type tyrosine-protein phosphatase kappa OS=Mus musculus GN=Ptpkr PE=1 SV=1 - [PTPRK_MOUSE]                                                                                                                                 | 7.08  | 1 | 1   | 1   | 1   | 1.571 | 0.888 | 0.604 | 1.005 | 2.81    | 7.08  | 1   | 1   | 113  | 13.6  | 8.40 |
| Q7TQF2   | Fatty acid synthase OS=Mus musculus GN=Fasn PE=1 SV=2 - [FAS_MOUSE]                                                                                                                                                                 | 7.05  | 2 | 6   | 6   | 11  | 1.278 | 1.054 | 0.934 | 1.005 | 26.17   | 7.05  | 9   | 11  | 950  | 104.4 | 7.85 |
| P35822   | Receptor-type tyrosine-protein phosphatase kappa OS=Mus musculus GN=Ptpkr PE=1 SV=1 - [PTPRK_MOUSE]                                                                                                                                 | 6.52  | 1 | 6   | 7   | 18  | 1.257 | 1.950 | 1.138 | 1.005 | 73.00   | 6.52  | 12  | 18  | 1457 | 164.1 | 5.95 |
| P19096   | Fatty acid synthase OS=Mus musculus GN=Fasn PE=1 SV=2 - [FAS_MOUSE]                                                                                                                                                                 | 54.59 | 4 | 102 | 103 | 614 | 0.720 | 0.601 | 0.817 | 1.005 | 1807.47 | 54.59 | 182 | 614 | 2504 | 272.3 | 6.58 |

|          |                                                                                                                |       |   |    |    |     |       |       |       |       |         |       |    |     |      |       |       |
|----------|----------------------------------------------------------------------------------------------------------------|-------|---|----|----|-----|-------|-------|-------|-------|---------|-------|----|-----|------|-------|-------|
| Q91YD9   | Neural Wiskott-Aldrich syndrome protein OS=Mus musculus GN=Wasl PE=1 SV=1 - [WASL_MOUSE]                       | 27.54 | 2 | 13 | 13 | 99  | 1.067 | 0.951 | 1.287 | 1.005 | 375.44  | 27.54 | 23 | 99  | 501  | 54.2  | 7.93  |
| E9Q912   | Protein Rap1gds1 OS=Mus musculus GN=Rap1gds1 PE=2 SV=1 - [E9Q912_MOUSE]                                        | 50.08 | 2 | 25 | 25 | 222 | 0.887 | 0.930 | 1.013 | 1.005 | 693.72  | 50.08 | 46 | 222 | 607  | 66.0  | 5.35  |
| G3X8Y3   | N-alpha-acetyltransferase 15, NatA auxiliary subunit OS=Mus musculus GN=Naa15 PE=4 SV=1 - [G3X8Y3_MOUSE]       | 27.28 | 3 | 20 | 24 | 74  | 0.687 | 0.722 | 0.896 | 1.005 | 198.51  | 27.28 | 42 | 74  | 865  | 101.0 | 7.52  |
| Q8CG64   | Fukutin-related protein OS=Mus musculus GN=Frkp PE=1 SV=1 - [FRKP_MOUSE]                                       | 4.66  | 1 | 2  | 2  | 6   | 0.944 | 0.952 | 0.803 | 1.005 | 18.36   | 4.66  | 4  | 6   | 494  | 54.8  | 7.17  |
| Q52KG3   | Melanoma antigen, family E, 2 OS=Mus musculus GN=Magee2 PE=2 SV=1 - [Q52KG3_MOUSE]                             | 18.16 | 1 | 8  | 8  | 17  | 0.845 | 1.252 | 0.771 | 1.005 | 46.60   | 18.16 | 12 | 17  | 523  | 59.7  | 4.93  |
| J3QP85   | Nucleoporin NDC1 OS=Mus musculus GN=Tmem48 PE=4 SV=1 - [J3QP85_MOUSE]                                          | 5.55  | 2 | 2  | 2  | 4   | 1.167 | 0.856 | 0.958 | 1.005 | 14.15   | 5.55  | 4  | 4   | 541  | 60.3  | 8.70  |
| Q8BW96   | Calcium/calmodulin-dependent protein kinase type 1D OS=Mus musculus GN=Camk1d PE=1 SV=2 - [KCC1D_MOUSE]        | 55.58 | 3 | 12 | 16 | 100 | 0.993 | 1.915 | 1.504 | 1.005 | 340.18  | 55.58 | 28 | 100 | 385  | 42.9  | 7.17  |
| A3KG57   | Serine/arginine-rich-splicing factor 12 (Fragment) OS=Mus musculus GN=Srsf12 PE=2 SV=1 - [A3KG57_MOUSE]        | 17.24 | 1 | 2  | 4  | 11  | 1.200 | 1.084 | 0.925 | 1.005 | 34.33   | 17.24 | 7  | 11  | 261  | 30.3  | 11.58 |
| Q8BGF0   | Protein AWS51984 OS=Mus musculus GN=AWS51984 PE=2 SV=1 - [Q8BGF0_MOUSE]                                        | 35.70 | 3 | 23 | 26 | 82  | 0.798 | 0.794 | 0.515 | 1.005 | 237.13  | 35.70 | 43 | 82  | 804  | 89.4  | 6.92  |
| Q9D168   | Integrator complex subunit 12 OS=Mus musculus GN=Ints12 PE=1 SV=1 - [INT12_MOUSE]                              | 9.76  | 1 | 4  | 4  | 5   | 1.538 | 0.685 | 1.224 | 1.005 | 13.21   | 9.76  | 4  | 5   | 461  | 48.5  | 9.69  |
| Q3TIR3   | Synembryn-A OS=Mus musculus GN=Ric8a PE=1 SV=2 - [RIC8A_MOUSE]                                                 | 33.58 | 1 | 14 | 16 | 62  | 0.671 | 1.051 | 0.925 | 1.005 | 174.58  | 33.58 | 29 | 62  | 530  | 59.8  | 5.68  |
| Q9JKF1   | Ras GTPase-activating-like protein IQGAP1 OS=Mus musculus GN=Iqgap1 PE=1 SV=2 - [IQGAP1_MOUSE]                 | 24.98 | 1 | 29 | 32 | 80  | 0.958 | 1.334 | 0.789 | 1.005 | 220.65  | 24.98 | 53 | 80  | 1657 | 188.6 | 6.48  |
| Q32NY6   | COUP transcription factor 1 OS=Mus musculus GN=Nr2f1 PE=2 SV=1 - [Q32NY6_MOUSE]                                | 18.33 | 4 | 1  | 5  | 10  | 0.556 | 0.619 | 0.916 | 1.005 | 16.01   | 18.33 | 7  | 10  | 420  | 45.9  | 8.25  |
| Q3U1L6-2 | Isoform 2 of Pleckstrin homology domain-containing family A member 7 OS=Mus musculus GN=Phka7 - [PHKA7_MOUSE]  | 14.77 | 6 | 13 | 13 | 21  | 0.740 | 0.719 | 0.764 | 1.005 | 59.04   | 14.77 | 19 | 21  | 1266 | 143.7 | 9.01  |
| D3Z580   | Protein Celf5 OS=Mus musculus GN=Celf5 PE=2 SV=1 - [D3Z580_MOUSE]                                              | 14.72 | 5 | 2  | 6  | 15  | 0.460 | 1.994 | 1.428 | 1.006 | 37.45   | 14.72 | 11 | 15  | 394  | 42.5  | 7.90  |
| Q9CQV8-2 | Isoform Short of 14-3-3 protein beta/alpha OS=Mus musculus GN=Ywhab -                                          | 78.69 | 4 | 12 | 23 | 864 | 0.929 | 1.182 | 0.986 | 1.006 | 2357.11 | 78.69 | 40 | 864 | 244  | 27.8  | 4.83  |
| Q9D2M8   | Ubiquitin-conjugating enzyme E2 variant 2 OS=Mus musculus GN=Ube2v2 PE=2 SV=4 - [UB2V2_MOUSE]                  | 70.34 | 5 | 5  | 10 | 101 | 0.773 | 0.998 | 0.889 | 1.006 | 264.42  | 70.34 | 16 | 101 | 145  | 16.4  | 8.09  |
| Q9Z2S7-3 | Isoform 3 of TSC22 domain family protein 3 OS=Mus musculus GN=Tsc22d3 -                                        | 23.38 | 4 | 4  | 5  | 28  | 1.925 | 0.775 | 0.958 | 1.006 | 72.02   | 23.38 | 8  | 28  | 201  | 22.6  | 4.77  |
| Q5SVR0-2 | Isoform 2 of TBC1 domain family member 9B OS=Mus musculus GN=Tbc1d9b -                                         | 19.58 | 2 | 19 | 21 | 57  | 1.060 | 0.964 | 0.880 | 1.006 | 159.03  | 19.58 | 35 | 57  | 1246 | 139.8 | 5.35  |
| Q3TF37   | Myosin-binding protein C, cardiac-type OS=Mus musculus GN=Mybpc3 PE=2 SV=1 - [Q3TF37_MOUSE]                    | 5.84  | 4 | 3  | 4  | 4   | 0.556 | 1.014 | 1.244 | 1.006 | 7.32    | 5.84  | 4  | 4   | 1113 | 124.1 | 7.01  |
| O70152   | Dolichol-phosphate mannosyltransferase OS=Mus musculus GN=Dpm1 PE=2 SV=1 - [DPM1_MOUSE]                        | 25.77 | 3 | 7  | 7  | 26  | 0.626 | 0.573 | 0.745 | 1.006 | 67.82   | 25.77 | 13 | 26  | 260  | 29.2  | 9.51  |
| F6T4M4   | Serine/arginine repetitive matrix protein 1 (Fragment) OS=Mus musculus GN=Srrm1 PE=2 SV=1 - [F6T4M4_MOUSE]     | 24.29 | 2 | 1  | 4  | 127 | 1.275 | 1.361 | 0.999 | 1.006 | 183.86  | 24.29 | 7  | 127 | 140  | 16.2  | 5.38  |
| Q3TRM4-2 | Isoform 2 of Neuroathy target esterase OS=Mus musculus GN=Prpla6 - [PLPL6_MOUSE]                               | 11.04 | 4 | 12 | 14 | 32  | 0.998 | 0.679 | 0.704 | 1.006 | 83.13   | 11.04 | 22 | 32  | 1323 | 146.0 | 7.84  |
| Q9J178   | Peptide-N(4)-(N-acetyl-beta-glucosaminyl)asparagine amidase OS=Mus musculus GN=Ngly1 PE=1 SV=2 - [NGLY1_MOUSE] | 26.42 | 1 | 16 | 16 | 38  | 0.915 | 0.922 | 0.886 | 1.006 | 95.19   | 26.42 | 24 | 38  | 651  | 74.2  | 6.89  |

|        |                                                                                                                            |       |    |    |    |     |        |       |       |       |        |       |    |     |      |       |      |
|--------|----------------------------------------------------------------------------------------------------------------------------|-------|----|----|----|-----|--------|-------|-------|-------|--------|-------|----|-----|------|-------|------|
| Q80YR5 | Scaffold attachment factor B2 OS=Mus musculus GN=Safb2 PE=1 SV=2 - [SAFB2_MOUSE]                                           | 22.00 | 7  | 7  | 18 | 43  | 1.047  | 0.665 | 1.180 | 1.006 | 125.25 | 22.00 | 26 | 43  | 991  | 111.8 | 6.38 |
| Q922E6 | FAST kinase domain-containing protein 2 OS=Mus musculus GN=Fastkd2 PE=2 SV=2 - [FAKD2_MOUSE]                               | 15.09 | 1  | 9  | 9  | 25  | 0.962  | 0.856 | 0.969 | 1.006 | 65.33  | 15.09 | 16 | 25  | 689  | 78.9  | 8.90 |
| Q9QXE7 | F-box-like/WD repeat-containing protein TBL1X OS=Mus musculus GN=Tbl1x PE=2 SV=2 - [TBL1X_MOUSE]                           | 13.09 | 1  | 2  | 5  | 11  | 1.999  | 1.125 | 0.925 | 1.006 | 28.90  | 13.09 | 8  | 11  | 527  | 56.8  | 5.72 |
| Q3UJK4 | GTP-binding protein 2 OS=Mus musculus GN=Gtbp2 PE=2 SV=1 - [GTPB2_MOUSE]                                                   | 3.16  | 2  | 1  | 1  | 1   | 2.039  | 1.437 | 0.664 | 1.006 | 3.61   | 3.16  | 1  | 1   | 602  | 65.7  | 8.05 |
| Q8JZNS | Acyl-CoA dehydrogenase family member 9, mitochondrial OS=Mus musculus GN=Acad9 PE=2 SV=2 - [ACAD9_MOUSE]                   | 45.28 | 3  | 23 | 23 | 97  | 0.932  | 0.790 | 0.832 | 1.006 | 277.50 | 45.28 | 40 | 97  | 625  | 68.7  | 7.46 |
| Q9CZC8 | Secernin-1 OS=Mus musculus GN=Scrn1 PE=1 SV=1 - [SCRN1_MOUSE]                                                              | 50.00 | 2  | 19 | 20 | 220 | 1.515  | 0.940 | 1.120 | 1.006 | 624.47 | 50.00 | 35 | 220 | 414  | 46.3  | 4.79 |
| F8VPQ1 | Dedicator of cytokinesis protein 3 OS=Mus musculus GN=Dock3 PE=2 SV=1 - [F8VPQ1_MOUSE]                                     | 24.73 | 4  | 43 | 45 | 146 | 0.768  | 1.300 | 1.199 | 1.006 | 386.50 | 24.73 | 76 | 146 | 2030 | 233.1 | 6.99 |
| Q8R086 | Sulfite oxidase, mitochondrial OS=Mus musculus GN=Suox PE=1 SV=2 - [SUOX_MOUSE]                                            | 19.41 | 1  | 7  | 7  | 30  | 1.925  | 1.118 | 0.827 | 1.006 | 90.69  | 19.41 | 14 | 30  | 546  | 60.7  | 6.54 |
| Q8VB79 | Tether containing UBX domain for GLUT4 OS=Mus musculus GN=Aspscr1 PE=1 SV=1 - [ASPC1_MOUSE]                                | 40.91 | 14 | 14 | 14 | 53  | 1.020  | 0.813 | 0.888 | 1.006 | 163.87 | 40.91 | 23 | 53  | 550  | 59.8  | 6.96 |
| Q9R0Y5 | Adenylate kinase isoenzyme 1 OS=Mus musculus GN=Ak1 PE=1 SV=1 - [KAD1_MOUSE]                                               | 69.59 | 2  | 13 | 14 | 253 | 1.589  | 1.104 | 1.313 | 1.006 | 806.19 | 69.59 | 27 | 253 | 194  | 21.5  | 5.81 |
| Q9D2Z4 | Sentrin-specific protease 8 OS=Mus musculus GN=Senp8 PE=1 SV=2 - [SENP8_MOUSE]                                             | 19.91 | 1  | 3  | 3  | 7   | 1.221  | 1.029 | 0.874 | 1.006 | 28.67  | 19.91 | 5  | 7   | 221  | 25.0  | 5.95 |
| Q5F4S8 | Protein Trpm3 OS=Mus musculus GN=Trpm3 PE=2 SV=1 - [Q5F4S8_MOUSE]                                                          | 17.36 | 3  | 1  | 25 | 70  | 0.821  | 1.464 | 0.933 | 1.006 | 191.49 | 17.36 | 45 | 70  | 1711 | 195.1 | 7.50 |
| F6S6C3 | Sentrin-specific protease 5 (Fragment) OS=Mus musculus GN=Senp5 PE=2 SV=1 - [F6S6C3_MOUSE]                                 | 11.20 | 3  | 4  | 5  | 5   | 1.134  | 0.878 | 0.992 | 1.006 | 7.21   | 11.20 | 5  | 5   | 607  | 69.4  | 9.09 |
| Q9JKK8 | Serine/threonine-protein kinase ATR OS=Mus musculus GN=Atr PE=1 SV=2 - [ATR_MOUSE]                                         | 1.21  | 2  | 3  | 3  | 3   | 0.531  | 0.518 | 0.924 | 1.007 | 6.30   | 1.21  | 3  | 3   | 2635 | 300.0 | 7.53 |
| Q7TT15 | Putative polypeptide N-acetylgalactosaminyltransferase-like protein 3 OS=Mus musculus GN=Wbscr17 PE=1 SV=1 - [GLTL3_MOUSE] | 8.03  | 3  | 4  | 4  | 6   | 0.829  | 0.816 | 0.809 | 1.007 | 15.68  | 8.03  | 6  | 6   | 598  | 67.6  | 8.90 |
| F7AGB5 | Methyltransferase-like protein 17, mitochondrial (Fragment) OS=Mus musculus GN=Mettl17 PE=2 SV=1 - [METTL17_MOUSE]         | 6.07  | 4  | 2  | 2  | 2   | 7.948  | 1.895 | 0.734 | 1.007 | 1.81   | 6.07  | 2  | 2   | 280  | 31.6  | 8.25 |
| Q9ERG2 | Striatin-3 OS=Mus musculus GN=Strn3 PE=1 SV=1 - [STRN3_MOUSE]                                                              | 30.53 | 2  | 17 | 22 | 73  | 1.223  | 1.381 | 1.057 | 1.007 | 220.04 | 30.53 | 36 | 73  | 796  | 87.1  | 5.29 |
| Q641P0 | Actin-related protein 3B OS=Mus musculus GN=Actr3b PE=2 SV=1 - [ARF3B_MOUSE]                                               | 42.34 | 2  | 12 | 16 | 146 | 0.505  | 1.789 | 1.567 | 1.007 | 411.51 | 42.34 | 31 | 146 | 418  | 47.5  | 6.02 |
| P48428 | Tubulin-specific chaperone A OS=Mus musculus GN=Tbca PE=2 SV=3 - [TBCA_MOUSE]                                              | 58.33 | 1  | 8  | 8  | 43  | 1.775  | 0.766 | 1.139 | 1.007 | 101.76 | 58.33 | 15 | 43  | 108  | 12.7  | 5.27 |
| P52482 | Ubiquitin-conjugating enzyme E2 E1 OS=Mus musculus GN=Ube2e1 PE=2 SV=1                                                     | 32.64 | 4  | 3  | 4  | 10  | 1.434  | 1.136 | 1.394 | 1.007 | 21.11  | 32.64 | 6  | 10  | 193  | 21.3  | 8.53 |
| P62141 | Serine/threonine-protein phosphatase PP1-beta catalytic subunit OS=Mus musculus GN=Ppp1cb PE=1 SV=3 [PP1B_MOUSE]           | 62.08 | 1  | 7  | 19 | 134 | 1.417  | 1.202 | 1.051 | 1.007 | 411.03 | 62.08 | 34 | 134 | 327  | 37.2  | 6.19 |
| P28474 | Alcohol dehydrogenase class-3 OS=Mus musculus GN=Adh5 PE=1 SV=3 - [ADHX_MOUSE]                                             | 45.19 | 2  | 13 | 13 | 85  | 1.421  | 0.982 | 0.841 | 1.007 | 242.86 | 45.19 | 23 | 85  | 374  | 39.5  | 7.25 |
| Q9CY27 | Very-long-chain enoyl-CoA reductase OS=Mus musculus GN=Tecr PE=1 SV=1 - [TECR_MOUSE]                                       | 31.49 | 3  | 10 | 12 | 49  | 0.689  | 0.742 | 0.789 | 1.007 | 113.89 | 31.49 | 20 | 49  | 308  | 36.1  | 9.55 |
| P42580 | NK1 transcription factor-related protein 2 OS=Mus musculus GN=Nkx1-2 PE=1 SV=1 [NKX12_MOUSE]                               | 4.59  | 2  | 1  | 1  | 1   | 21.155 | 3.958 | 2.311 | 1.007 | 2.83   | 4.59  | 1  | 1   | 305  | 32.0  | 6.70 |

|          |                                                                                                                               |       |   |    |    |     |       |       |       |       |         |       |    |     |      |       |      |
|----------|-------------------------------------------------------------------------------------------------------------------------------|-------|---|----|----|-----|-------|-------|-------|-------|---------|-------|----|-----|------|-------|------|
| E9PUD2   | Dynamin-1-like protein OS=Mus musculus GN=Dnm1l PE=2 SV=1 - [E9PUD2_MOUSE]                                                    | 74.02 | 3 | 4  | 47 | 387 | 0.734 | 0.654 | 0.808 | 1.007 | 1093.79 | 74.02 | 85 | 387 | 712  | 79.5  | 7.08 |
| Q8BPM0   | Disheveled-associated activator of morphogenesis 1 OS=Mus musculus GN=Dam1 PE=1 SV=4 - [Q8BPM0_MOUSE]                         | 30.08 | 5 | 27 | 32 | 118 | 0.669 | 0.834 | 1.037 | 1.007 | 301.61  | 30.08 | 52 | 118 | 1077 | 123.3 | 7.46 |
| Q8BXQ0   | Ethanolamine kinase 1 OS=Mus musculus GN=Etnk1 PE=2 SV=1 - [Q8BXQ0_MOUSE]                                                     | 10.47 | 2 | 4  | 4  | 6   | 0.710 | 0.999 | 0.887 | 1.007 | 14.61   | 10.47 | 6  | 6   | 363  | 42.0  | 5.44 |
| Q9CSU0-2 | Isoform 2 of Regulation of nuclear pre-mRNA domain-containing protein 1B OS=Mus musculus GN=Rprd1b - [Q9CSU0-2_MOUSE]         | 30.95 | 5 | 6  | 7  | 18  | 1.180 | 1.014 | 0.756 | 1.007 | 68.85   | 30.95 | 11 | 18  | 294  | 33.5  | 5.64 |
| Q6VH22   | Intraflagellar transport protein 172 homolog OS=Mus musculus GN=Itih172 PE=1 SV=1 - [IF172_MOUSE]                             | 5.09  | 3 | 5  | 7  | 12  | 1.445 | 1.266 | 0.771 | 1.007 | 36.06   | 5.09  | 8  | 12  | 1749 | 197.4 | 6.02 |
| Q9CZD5   | Translation initiation factor IF-3, mitochondrial OS=Mus musculus GN=Mtif3 PE=1 SV=1 - [IF3M_MOUSE]                           | 13.41 | 1 | 2  | 2  | 6   | 1.965 | 1.258 | 1.057 | 1.007 | 23.73   | 13.41 | 4  | 6   | 276  | 31.7  | 9.42 |
| Q922Q4   | Pyroline-5-carboxylate reductase 2 OS=Mus musculus GN=Pycr2 PE=2 SV=1 - [P5CR2_MOUSE]                                         | 49.38 | 1 | 10 | 13 | 58  | 0.818 | 0.907 | 0.858 | 1.008 | 186.25  | 49.38 | 25 | 58  | 320  | 33.6  | 7.77 |
| Q9CZV8   | F-box/LRR-repeat protein 20 OS=Mus musculus GN=Fbxl20 PE=1 SV=3 - [FXL20_MOUSE]                                               | 27.52 | 6 | 7  | 10 | 25  | 0.444 | 0.861 | 0.816 | 1.008 | 79.13   | 27.52 | 16 | 25  | 436  | 48.4  | 7.49 |
| P25233   | Necdin OS=Mus musculus GN=Ndn PE=1 SV=1 - [NECD_MOUSE]                                                                        | 8.00  | 1 | 2  | 2  | 6   | 1.407 | 0.857 | 0.620 | 1.008 | 20.69   | 8.00  | 4  | 6   | 325  | 36.8  | 8.51 |
| Q8R395   | COMM domain-containing protein 5 OS=Mus musculus GN=Comm5 PE=2 SV=1 - [Q8R395_MOUSE]                                          | 33.48 | 1 | 6  | 6  | 15  | 1.095 | 1.246 | 0.885 | 1.008 | 48.09   | 33.48 | 10 | 15  | 224  | 24.5  | 8.06 |
| Q3UII8   | Metastasis-associated protein MTA3 OS=Mus musculus GN=Mta3 PE=2 SV=1 - [Q3UII8_MOUSE]                                         | 26.79 | 7 | 8  | 14 | 49  | 0.611 | 0.675 | 0.757 | 1.008 | 131.78  | 26.79 | 23 | 49  | 586  | 66.3  | 8.82 |
| Q9JMH7   | Sialidase-3 OS=Mus musculus GN=Neu3 PE=2 SV=1 - [NEUR3_MOUSE]                                                                 | 2.63  | 1 | 1  | 1  | 2   | 1.057 | 0.694 | 0.869 | 1.008 | 7.45    | 2.63  | 2  | 2   | 418  | 46.8  | 6.71 |
| Q9CZX0   | Elongator complex protein 3 OS=Mus musculus GN=Elp3 PE=2 SV=1 - [ELP3_MOUSE]                                                  | 41.68 | 2 | 20 | 20 | 51  | 0.660 | 0.795 | 0.734 | 1.008 | 148.77  | 41.68 | 34 | 51  | 547  | 62.3  | 8.90 |
| D3Z7G4   | Protein BC024978 OS=Mus musculus GN=BC024978 PE=4 SV=1 - [D3Z7G4_MOUSE]                                                       | 8.63  | 4 | 2  | 2  | 4   | 1.356 | 1.225 | 1.028 | 1.008 | 17.52   | 8.63  | 4  | 4   | 336  | 36.5  | 5.99 |
| Q9D0F1   | Kinetochores protein NDC80 homolog OS=Mus musculus GN=Ndc80 PE=2 SV=1 - [NDC80_MOUSE]                                         | 1.87  | 1 | 1  | 1  | 1   | 3.379 | 1.539 | 1.477 | 1.008 | 4.20    | 1.87  | 1  | 1   | 642  | 73.9  | 5.95 |
| Q9CQI9   | Mediator of RNA polymerase II transcription subunit 30 OS=Mus musculus GN=Med30 PE=1 SV=1 - [Q9CQI9_MOUSE]                    | 21.91 | 1 | 4  | 4  | 7   | 1.086 | 1.175 | 1.451 | 1.008 | 17.72   | 21.91 | 5  | 7   | 178  | 20.3  | 8.28 |
| E9Q5C9   | Protein Nol1 OS=Mus musculus GN=Nol1 PE=2 SV=1 - [E9Q5C9_MOUSE]                                                               | 24.36 | 1 | 17 | 17 | 42  | 0.681 | 0.847 | 0.951 | 1.008 | 98.74   | 24.36 | 29 | 42  | 702  | 73.7  | 9.36 |
| Q71FD5   | E3 ubiquitin-protein ligase ZNRF2 OS=Mus musculus GN=Znrf2 PE=1 SV=1 - [ZNRF2_MOUSE]                                          | 34.03 | 4 | 3  | 4  | 21  | 1.864 | 0.795 | 1.198 | 1.008 | 48.73   | 34.03 | 7  | 21  | 238  | 23.7  | 6.76 |
| P70302   | Stromal interaction molecule 1 OS=Mus musculus GN=Stim1 PE=1 SV=2 - [STIM1_MOUSE]                                             | 23.07 | 1 | 15 | 15 | 39  | 0.913 | 1.104 | 1.105 | 1.008 | 104.22  | 23.07 | 27 | 39  | 685  | 77.5  | 6.54 |
| Q9D3V5   | Fibrous sheath-interacting protein 1 OS=Mus musculus GN=Fsip1 PE=1 SV=1 - [FSIP1_MOUSE]                                       | 2.53  | 1 | 1  | 1  | 1   | 0.821 | 1.013 | 1.043 | 1.008 | 1.74    | 2.53  | 1  | 1   | 435  | 48.9  | 4.96 |
| E9PX73   | T-lymphocyte surface antigen Ly-9 OS=Mus musculus GN=Ly9 PE=2 SV=1 - [E9PX73_MOUSE]                                           | 5.33  | 3 | 2  | 2  | 4   | 1.302 | 0.882 | 0.923 | 1.008 | 0.00    | 5.33  | 2  | 4   | 544  | 61.1  | 7.11 |
| Q91VK4   | Integral membrane protein 2C OS=Mus musculus GN=Itih2c PE=1 SV=2 - [ITM2C_MOUSE]                                              | 32.71 | 1 | 5  | 5  | 18  | 1.387 | 1.025 | 0.993 | 1.008 | 79.92   | 32.71 | 9  | 18  | 269  | 30.5  | 8.59 |
| G5E8J9   | SCY1-like protein 2 OS=Mus musculus GN=Scyl2 PE=2 SV=1 - [G5E8J9_MOUSE]                                                       | 26.70 | 3 | 1  | 22 | 84  | 0.731 | 1.124 | 1.240 | 1.008 | 249.38  | 26.70 | 38 | 84  | 929  | 103.1 | 8.02 |
| Q99PH1   | Leucine-rich repeat-containing protein 4 OS=Mus musculus GN=Lrrc4 PE=1 SV=2 - [LRRC4_MOUSE]                                   | 7.67  | 1 | 3  | 4  | 9   | 0.921 | 1.504 | 1.226 | 1.008 | 24.96   | 7.67  | 6  | 9   | 652  | 72.6  | 7.01 |
| Q80U62-3 | Isoform 3 of Run domain Beclin-1 interacting and cysteine-rich containing protein OS=Mus musculus GN=Kiaa0226 - [RUBIC_MOUSE] | 4.31  | 6 | 4  | 4  | 8   | 1.095 | 0.774 | 1.089 | 1.008 | 13.31   | 4.31  | 5  | 8   | 927  | 103.9 | 6.01 |

|          |                                                                                                                       |       |    |    |    |     |       |       |       |       |         |       |    |     |      |       |       |
|----------|-----------------------------------------------------------------------------------------------------------------------|-------|----|----|----|-----|-------|-------|-------|-------|---------|-------|----|-----|------|-------|-------|
| P49194   | Retinol-binding protein 3<br>OS=Mus musculus<br>GN=Rbp3 PE=2 SV=3 -<br>[RET3_MOUSE]                                   | 4.13  | 1  | 2  | 2  | 2   | 1.161 | 0.768 | 1.032 | 1.008 | 2.29    | 4.13  | 2  | 2   | 1234 | 134.4 | 5.11  |
| Q6PAR5-2 | Isoform 2 of GTPase-activating protein and VPS9 domain-containing protein 1 OS=Mus musculus GN=Gapvd1 - [GAPD1_MOUSE] | 21.29 | 14 | 24 | 25 | 93  | 0.851 | 1.011 | 1.003 | 1.009 | 236.63  | 21.29 | 44 | 93  | 1437 | 160.0 | 5.20  |
| Q02384   | Son of sevenless homolog 2 OS=Mus musculus GN=Sos2 PE=1 SV=2 - [SOS2_MOUSE]                                           | 7.50  | 1  | 6  | 11 | 25  | 1.046 | 0.886 | 0.909 | 1.009 | 63.15   | 7.50  | 19 | 25  | 1333 | 153.0 | 6.76  |
| Q8VE37   | Regulator of chromosome condensation OS=Mus musculus GN=Rcc1 PE=1 SV=1 - [RCC1_MOUSE]                                 | 26.13 | 3  | 8  | 8  | 22  | 0.924 | 0.623 | 0.966 | 1.009 | 54.55   | 26.13 | 13 | 22  | 421  | 44.9  | 8.10  |
| P54823   | Probable ATP-dependent RNA helicase DDX6 OS=Mus musculus GN=Ddx6 PE=2 SV=1 - [DDX6_MOUSE]                             | 39.13 | 3  | 14 | 15 | 115 | 0.632 | 0.839 | 0.831 | 1.009 | 301.61  | 39.13 | 28 | 115 | 483  | 54.2  | 8.66  |
| Q9D0D3   | Poly(A) RNA polymerase, mitochondrial OS=Mus musculus GN=Mtpap PE=2 SV=1 - [PAPD1_MOUSE]                              | 19.32 | 1  | 9  | 9  | 25  | 0.784 | 0.787 | 0.994 | 1.009 | 63.17   | 19.32 | 14 | 25  | 585  | 65.2  | 8.88  |
| F6SDD7   | DNA topoisomerase (Fragment) OS=Mus musculus GN=Top3b PE=3 SV=1 - [F6SDD7_MOUSE]                                      | 20.49 | 2  | 9  | 9  | 22  | 1.535 | 0.923 | 1.086 | 1.009 | 57.33   | 20.49 | 16 | 22  | 527  | 60.0  | 7.40  |
| Q8BT51   | Cytochrome c oxidase assembly factor 4 homolog, mitochondrial OS=Mus musculus GN=CO4 PE=3 SV=1 - [CO4_MOUSE]          | 21.84 | 1  | 2  | 2  | 16  | 1.751 | 1.203 | 1.031 | 1.009 | 42.02   | 21.84 | 4  | 16  | 87   | 10.1  | 6.90  |
| Q8BXQ8   | Protein FAM53C OS=Mus musculus GN=Fam53c PE=1 SV=1 - [FAM53C_MOUSE]                                                   | 3.31  | 1  | 1  | 1  | 2   | 1.161 | 1.097 | 1.463 | 1.009 | 7.65    | 3.31  | 2  | 2   | 393  | 43.2  | 7.72  |
| Q6P3D0   | U8 snoRNA-decapping enzyme OS=Mus musculus GN=Nudt16 PE=1 SV=1 - [NUDT16_MOUSE]                                       | 65.13 | 2  | 10 | 11 | 30  | 0.628 | 1.183 | 0.902 | 1.009 | 96.39   | 65.13 | 19 | 30  | 195  | 21.8  | 7.12  |
| P40142   | Transketolase OS=Mus musculus GN=Tkt PE=1 SV=1 - [TKT_MOUSE]                                                          | 64.69 | 1  | 36 | 36 | 540 | 1.970 | 0.793 | 0.779 | 1.009 | 1436.55 | 64.69 | 66 | 540 | 623  | 67.6  | 7.50  |
| E9QM16   | Pre-mRNA-processing factor 40 homolog B (Fragment) OS=Mus musculus GN=Prpf40b PE=2 SV=1 - [PRPF40B_MOUSE]             | 6.46  | 7  | 4  | 5  | 19  | 1.038 | 0.986 | 0.961 | 1.009 | 37.85   | 6.46  | 10 | 19  | 852  | 97.0  | 7.03  |
| Q9QZB7   | Actin-related protein 10 OS=Mus musculus GN=Actr10 PE=1 SV=2 - [ARP10_MOUSE]                                          | 53.24 | 1  | 18 | 19 | 73  | 0.687 | 0.924 | 0.961 | 1.009 | 162.30  | 53.24 | 30 | 73  | 417  | 46.2  | 7.61  |
| Q9WTS5   | Teneurin-2 OS=Mus musculus GN=Tenn2 PE=2 SV=1 - [TEN2_MOUSE]                                                          | 10.17 | 1  | 17 | 21 | 70  | 0.727 | 0.846 | 0.772 | 1.009 | 182.77  | 10.17 | 33 | 70  | 2764 | 306.3 | 6.68  |
| P61979-3 | Isoform 3 of Heterogeneous nuclear ribonucleoprotein K OS=Mus musculus GN=Hnmpk - [HNMPK_MOUSE]                       | 54.44 | 9  | 4  | 20 | 383 | 1.141 | 1.122 | 1.110 | 1.009 | 1033.81 | 54.44 | 39 | 383 | 439  | 48.5  | 5.92  |
| Q8CHT1-2 | Isoform 2 of Ephexin-1 OS=Mus musculus GN=Ngef - [NGEF_MOUSE]                                                         | 31.61 | 4  | 19 | 19 | 66  | 0.566 | 1.384 | 1.859 | 1.009 | 198.56  | 31.61 | 35 | 66  | 620  | 71.4  | 5.24  |
| I7HIP9   | Cadherin-22 OS=Mus musculus GN=Cdh22 PE=3 SV=1 - [I7HIP9_MOUSE]                                                       | 8.12  | 3  | 5  | 5  | 12  | 1.801 | 1.704 | 1.099 | 1.009 | 19.93   | 8.12  | 6  | 12  | 813  | 87.9  | 4.78  |
| Q8BUV6   | U7 snRNA-associated Sm-like protein LSM11 OS=Mus musculus GN=Lsm11 PE=1 SV=1 - [LSM11_MOUSE]                          | 9.42  | 1  | 2  | 2  | 3   | 0.776 | 0.753 | 0.888 | 1.009 | 12.18   | 9.42  | 2  | 3   | 361  | 39.9  | 10.73 |
| E9Q9X4   | Nitric oxide synthase OS=Mus musculus GN=Nos3 PE=2 SV=1 - [E9Q9X4_MOUSE]                                              | 3.80  | 2  | 3  | 4  | 10  | 0.684 | 1.087 | 0.988 | 1.009 | 17.01   | 3.80  | 7  | 10  | 1106 | 122.0 | 7.52  |
| O08601   | Microsomal triglyceride transfer protein large subunit OS=Mus musculus GN=Mtp PE=2 SV=2 - [MTP_MOUSE]                 | 7.27  | 2  | 6  | 6  | 7   | 0.881 | 1.037 | 0.812 | 1.010 | 18.71   | 7.27  | 7  | 7   | 894  | 99.0  | 7.62  |
| Q9CPN9   | Protein 2210010C04Rik OS=Mus musculus GN=2210010C04Rik PE=2 SV=1 - [Q9CPN9_MOUSE]                                     | 3.24  | 1  | 1  | 1  | 1   | 1.654 | 1.283 | 1.038 | 1.010 | 1.77    | 3.24  | 1  | 1   | 247  | 26.4  | 7.93  |
| Q9Z280-2 | Isoform PLD1B of Phospholipase D1 OS=Mus musculus GN=Pld1 - [PLD1_MOUSE]                                              | 6.56  | 4  | 2  | 6  | 14  | 1.119 | 0.501 | 0.825 | 1.010 | 45.61   | 6.56  | 9  | 14  | 1036 | 119.5 | 8.70  |
| Q8CAV6   | Protein kinase C theta type OS=Mus musculus GN=Prkcq PE=2 SV=1 - [Q8CAV6_MOUSE]                                       | 18.39 | 3  | 8  | 11 | 37  | 0.936 | 0.504 | 0.890 | 1.010 | 92.91   | 18.39 | 17 | 37  | 571  | 64.9  | 8.06  |
| Q8BGF3   | WD repeat-containing protein 92 OS=Mus musculus GN=Wdr92 PE=2 SV=1 -                                                  | 3.36  | 1  | 1  | 1  | 2   | 1.835 | 0.910 | 0.763 | 1.010 | 6.11    | 3.36  | 2  | 2   | 357  | 39.8  | 8.15  |

|          |                                                                                                           |       |   |    |    |     |       |       |       |       |        |       |    |     |      |       |      |
|----------|-----------------------------------------------------------------------------------------------------------|-------|---|----|----|-----|-------|-------|-------|-------|--------|-------|----|-----|------|-------|------|
| Q8BFW3-2 | Isoform 2 of Protein phosphatase 1 regulatory subunit 15B OS=Mus musculus GN=Ppp1r15b - [PR15B_MOUSE]     | 1.33  | 2 | 1  | 1  | 1   | 1.864 | 0.991 | 0.927 | 1.010 | 0.00   | 1.33  | 1  | 1   | 679  | 75.8  | 5.01 |
| Q8JZR6   | Electroneutral sodium bicarbonate exchanger 1 OS=Mus musculus GN=Slc4a8 PE=2 SV=1 - [S4A8_MOUSE]          | 20.48 | 2 | 13 | 18 | 59  | 0.681 | 0.822 | 0.960 | 1.010 | 165.14 | 20.48 | 31 | 59  | 1089 | 122.3 | 6.60 |
| A8Y5P1   | High affinity copper uptake protein 1 OS=Mus musculus GN=Slc31a1 PE=2 SV=1 -                              | 14.62 | 2 | 1  | 1  | 7   | 1.041 | 1.167 | 1.151 | 1.010 | 25.06  | 14.62 | 2  | 7   | 130  | 14.5  | 7.17 |
| AZAR78   | TRAF family member-associated NF-kappa-B activator OS=Mus musculus GN=Tank PE=2 SV=1 - [AZAR78_MOUSE]     | 15.00 | 7 | 4  | 4  | 5   | 1.164 | 0.971 | 1.517 | 1.010 | 21.41  | 15.00 | 4  | 5   | 360  | 40.9  | 5.66 |
| Q8CAA7   | Glucose 1,6-bisphosphate synthase OS=Mus musculus GN=Pgm2l1 PE=1 SV=1 -                                   | 49.11 | 1 | 19 | 33 | 177 | 0.579 | 1.133 | 1.186 | 1.010 | 478.36 | 49.11 | 57 | 177 | 621  | 70.2  | 6.49 |
| Q9E5E3   | Ubiquitin carboxyl-terminal hydrolase 29 OS=Mus musculus GN=Usp29 PE=2 SV=2 - [UBP29_MOUSE]               | 4.26  | 1 | 3  | 3  | 8   | 0.344 | 0.661 | 0.611 | 1.010 | 20.59  | 4.26  | 5  | 8   | 869  | 97.8  | 5.60 |
| Q925J9-4 | Isoform 4 of Mediator of RNA polymerase II transcription subunit 1 OS=Mus musculus GN=Med1 - [MED1_MOUSE] | 3.91  | 3 | 3  | 4  | 5   | 2.440 | 1.112 | 1.277 | 1.010 | 14.55  | 3.91  | 5  | 5   | 1560 | 165.3 | 8.78 |
| Q8BX80   | Cytosolic endo-beta-N-acetylglucosaminidase OS=Mus musculus GN=Engase PE=2 SV=1 - [ENASE_MOUSE]           | 11.44 | 3 | 5  | 5  | 8   | 0.907 | 0.915 | 0.937 | 1.010 | 24.16  | 11.44 | 6  | 8   | 734  | 82.9  | 6.65 |
| G5E8E1   | Sodium channel and clathrin linker 1 OS=Mus musculus GN=Sc1t1 PE=2 SV=1 - [SCLT1_MOUSE]                   | 5.81  | 3 | 2  | 4  | 9   | 1.635 | 1.031 | 0.987 | 1.010 | 21.87  | 5.81  | 6  | 9   | 688  | 80.4  | 6.05 |
| Q61216   | Double-strand break repair protein MRE11A OS=Mus musculus GN=Mre11a PE=2 SV=1 - [MRE11_MOUSE]             | 9.92  | 3 | 7  | 7  | 11  | 0.726 | 1.011 | 0.973 | 1.010 | 28.40  | 9.92  | 9  | 11  | 706  | 80.2  | 6.01 |
| P56375   | Acylphosphatase-2 OS=Mus musculus GN=Acyp2 PE=2 SV=2 - [ACYP2_MOUSE]                                      | 47.17 | 1 | 6  | 6  | 51  | 2.210 | 0.743 | 1.210 | 1.011 | 187.24 | 47.17 | 10 | 51  | 106  | 11.9  | 9.26 |
| E9Q0J5   | Kinesin-like protein KIF21A OS=Mus musculus GN=Kif21a PE=3 SV=2 - [E9Q0J5_MOUSE]                          | 32.36 | 4 | 1  | 45 | 201 | 0.842 | 0.558 | 1.115 | 1.011 | 629.25 | 32.36 | 75 | 201 | 1672 | 186.5 | 6.47 |
| P97819-2 | Isoform Short of 85/88 kDa calcium-independent phospholipase A2 OS=Mus musculus GN=Pla2g6 - [PLPL9_MOUSE] | 9.97  | 4 | 5  | 5  | 13  | 0.701 | 1.202 | 0.950 | 1.011 | 45.93  | 9.97  | 8  | 13  | 752  | 83.6  | 7.18 |
| F6W810   | YjeF N-terminal domain-containing protein 3 OS=Mus musculus GN=YjeF3 PE=2 SV=2 - [YJENG_MOUSE]            | 29.48 | 1 | 7  | 7  | 11  | 0.760 | 4.431 | 4.653 | 1.011 | 37.45  | 29.48 | 11 | 11  | 251  | 27.0  | 7.40 |
| Q3TDX8-5 | Isoform 2 of Cytochrome b5 reductase 4 OS=Mus musculus GN=Cyb5r4 - [NB5R4_MOUSE]                          | 22.64 | 3 | 6  | 8  | 37  | 1.159 | 1.024 | 0.978 | 1.011 | 111.50 | 22.64 | 14 | 37  | 477  | 54.0  | 6.44 |
| B1AU8    | N-alpha-acetyltransferase 10 OS=Mus musculus GN=Naa10 PE=2 SV=1 - [B1AU8_MOUSE]                           | 27.27 | 6 | 3  | 7  | 28  | 1.009 | 1.028 | 1.019 | 1.011 | 86.11  | 27.27 | 13 | 28  | 220  | 24.8  | 5.52 |
| O70309   | Integrin beta-5 OS=Mus musculus GN=Itgb5 PE=1 SV=2 - [ITB5_MOUSE]                                         | 2.76  | 4 | 3  | 3  | 5   | 0.568 | 1.067 | 0.766 | 1.011 | 6.52   | 2.76  | 4  | 5   | 798  | 87.9  | 6.16 |
| Q9D6H2   | Heat shock protein beta-11 OS=Mus musculus GN=Hspb11 PE=1 SV=2 - [HSB11_MOUSE]                            | 19.58 | 1 | 2  | 2  | 6   | 1.382 | 0.933 | 1.026 | 1.011 | 21.63  | 19.58 | 3  | 6   | 143  | 16.3  | 5.16 |
| Q7TMJ8-2 | Isoform 2 of Phosphoinositide-3-kinase-interacting protein 1 OS=Mus musculus GN=PI3ip1 - [PI3IP1_MOUSE]   | 13.15 | 3 | 2  | 2  | 6   | 0.946 | 1.325 | 0.977 | 1.011 | 22.51  | 13.15 | 4  | 6   | 213  | 23.0  | 5.59 |
| MQQWA1   | Protein Csmd2 (Fragment) OS=Mus musculus GN=Csmd2 PE=4 SV=1 - [MQQWA1_MOUSE]                              | 3.10  | 1 | 9  | 9  | 21  | 0.841 | 1.115 | 1.084 | 1.011 | 60.00  | 3.10  | 15 | 21  | 3423 | 372.4 | 6.01 |
| Q9CWV0   | Mitochondrial assembly of ribosomal large subunit protein 1 OS=Mus musculus GN=Malsu1 PE=2 SV=1 -         | 7.46  | 6 | 1  | 2  | 4   | 1.249 | 1.069 | 0.781 | 1.011 | 9.74   | 7.46  | 4  | 4   | 228  | 26.0  | 6.73 |
| O54749   | Cytochrome P450 2J5 OS=Mus musculus GN=Cyp2j5 PE=2 SV=1 - [CP2J5_MOUSE]                                   | 5.39  | 3 | 1  | 2  | 4   | 1.058 | 1.659 | 0.922 | 1.011 | 11.27  | 5.39  | 3  | 4   | 501  | 57.7  | 8.73 |
| D3Z0M9   | MCG18410, isoform CRA_a OS=Mus musculus GN=Ddx23 PE=3 SV=1 - [D3Z0M9_MOUSE]                               | 18.19 | 1 | 15 | 15 | 34  | 0.849 | 1.005 | 0.889 | 1.011 | 110.11 | 18.19 | 25 | 34  | 819  | 95.4  | 9.58 |
| F8WHJ1   | FTS and Hook-interacting protein OS=Mus musculus GN=Fam160a2 PE=2 SV=1 - [F8WHJ1_MOUSE]                   | 24.31 | 4 | 1  | 16 | 40  | 1.593 | 1.262 | 1.224 | 1.011 | 121.67 | 24.31 | 26 | 40  | 909  | 99.1  | 6.44 |

|          |                                                                                                                                 |       |   |    |    |     |       |       |       |       |        |       |    |     |      |       |      |
|----------|---------------------------------------------------------------------------------------------------------------------------------|-------|---|----|----|-----|-------|-------|-------|-------|--------|-------|----|-----|------|-------|------|
| Q91Z61   | GTP-binding protein Di-Ras1 OS=Mus musculus GN=Diras1 PE=2 SV=1 - [DIRA1_MOUSE]                                                 | 67.68 | 2 | 9  | 13 | 51  | 0.704 | 0.802 | 1.024 | 1.011 | 162.00 | 67.68 | 21 | 51  | 198  | 22.3  | 8.90 |
| Q63829   | COMM domain-containing protein 3 OS=Mus musculus GN=Comm3 PE=2 SV=1 -                                                           | 37.95 | 1 | 6  | 6  | 21  | 1.000 | 1.291 | 0.863 | 1.011 | 58.20  | 37.95 | 11 | 21  | 195  | 22.0  | 5.59 |
| Q505D1   | Serine/threonine-protein phosphatase 6 regulatory ankyrin repeat subunit A OS=Mus musculus GN=Ankrd28 PE=1 SV=1 - [ANR28_MOUSE] | 9.78  | 1 | 7  | 8  | 13  | 1.051 | 1.347 | 1.325 | 1.011 | 28.38  | 9.78  | 12 | 13  | 1053 | 112.8 | 6.27 |
| Q3UGY8   | Brefeldin A-inhibited guanine nucleotide-exchange protein 3 OS=Mus musculus GN=Arfgap3 PE=1 SV=1 - [ARFG3_MOUSE]                | 21.66 | 1 | 39 | 39 | 122 | 0.720 | 0.902 | 0.895 | 1.011 | 328.11 | 21.66 | 68 | 122 | 2170 | 239.9 | 5.88 |
| F6QM56   | Acid trehalase-like protein 1 (Fragment) OS=Mus musculus GN=Ath11 PE=4 SV=1 - [F6QM56_MOUSE]                                    | 7.70  | 5 | 2  | 3  | 4   | 1.271 | 1.051 | 0.904 | 1.011 | 7.98   | 7.70  | 4  | 4   | 623  | 69.3  | 5.25 |
| Q55XA9   | Protein KIBRA OS=Mus musculus GN=Wwc1 PE=1 SV=1 - [KIBRA_MOUSE]                                                                 | 12.59 | 1 | 10 | 10 | 24  | 0.721 | 0.980 | 1.133 | 1.011 | 66.33  | 12.59 | 18 | 24  | 1104 | 124.0 | 5.97 |
| Q3USH1   | Protein FAM196A OS=Mus musculus GN=Fam196a PE=2 SV=1 - [F196A_MOUSE]                                                            | 24.17 | 2 | 7  | 7  | 14  | 1.105 | 0.812 | 1.063 | 1.012 | 45.94  | 24.17 | 10 | 14  | 422  | 46.2  | 7.14 |
| P31649   | Sodium- and chloride-dependent GABA transporter 2 OS=Mus musculus GN=Slc6a13 PE=1 SV=1 - [SLC6A13_MOUSE]                        | 10.47 | 2 | 4  | 5  | 23  | 0.417 | 3.825 | 0.752 | 1.012 | 65.59  | 10.47 | 9  | 23  | 602  | 68.2  | 6.25 |
| P46467   | Vacuolar protein sorting-associated protein 4B OS=Mus musculus GN=Vps4b PE=1 SV=2 - [VPS4B_MOUSE]                               | 39.41 | 2 | 10 | 15 | 44  | 0.944 | 1.006 | 0.944 | 1.012 | 121.93 | 39.41 | 28 | 44  | 444  | 49.4  | 7.11 |
| A2A6T1   | Cerebellar degeneration-related protein 2-like OS=Mus musculus GN=Cdr2l PE=2 SV=1 - [CDR2L_MOUSE]                               | 16.13 | 1 | 7  | 8  | 16  | 1.886 | 0.581 | 0.910 | 1.012 | 39.05  | 16.13 | 13 | 16  | 465  | 53.2  | 5.76 |
| Q571K4   | TGF-beta-activated kinase 1 and MAP3K7-binding protein 3 OS=Mus musculus GN=Tab3 PE=1 SV=2 - [TAB3_MOUSE]                       | 13.13 | 1 | 5  | 5  | 13  | 2.028 | 1.000 | 1.197 | 1.012 | 35.79  | 13.13 | 9  | 13  | 716  | 79.0  | 8.50 |
| Q9WTX5   | S-phase kinase-associated protein 1 OS=Mus musculus GN=Skp1 PE=1 SV=3 - [SKP1_MOUSE]                                            | 63.80 | 4 | 12 | 12 | 107 | 1.459 | 1.031 | 1.291 | 1.012 | 336.53 | 63.80 | 22 | 107 | 163  | 18.7  | 4.54 |
| D3Z2J3   | Putative ATP-dependent RNA helicase DHX30 OS=Mus musculus GN=Dhx30 PE=2 SV=1 - [D3Z2J3_MOUSE]                                   | 27.15 | 5 | 25 | 25 | 71  | 0.760 | 0.763 | 0.942 | 1.012 | 212.99 | 27.15 | 40 | 71  | 1186 | 132.9 | 8.59 |
| E9PZ00   | Sulfated glycoprotein 1 OS=Mus musculus GN=Psap PE=2 SV=1 - [E9PZ00_MOUSE]                                                      | 51.00 | 5 | 26 | 26 | 182 | 1.585 | 1.147 | 1.224 | 1.012 | 470.59 | 51.00 | 48 | 182 | 551  | 60.6  | 5.24 |
| Q9CZT8   | Ras-related protein Rab-3B OS=Mus musculus GN=Rab3b PE=1 SV=1 - [RAB3B_MOUSE]                                                   | 53.88 | 3 | 5  | 10 | 157 | 0.545 | 2.018 | 1.102 | 1.012 | 475.81 | 53.88 | 17 | 157 | 219  | 24.7  | 5.11 |
| Q80T10-2 | Isoform 2 of GRAM domain containing protein 1B OS=Mus musculus GN=Gramd1b - [GRM1B_MOUSE]                                       | 16.62 | 6 | 10 | 10 | 32  | 0.576 | 1.184 | 1.610 | 1.012 | 61.91  | 16.62 | 17 | 32  | 698  | 81.0  | 5.78 |
| Q7TSH4   | Centriolar coiled-coil protein of 110 kDa OS=Mus musculus GN=Ccp110 PE=1 SV=1 -                                                 | 15.94 | 1 | 12 | 13 | 28  | 1.117 | 0.815 | 1.047 | 1.012 | 92.03  | 15.94 | 21 | 28  | 1004 | 111.1 | 8.85 |
| P97287   | Induced myeloid leukemia cell differentiation protein Mcl-1 homolog OS=Mus musculus GN=Mcl1 PE=1 SV=3 - [MCL1_MOUSE]            | 6.34  | 1 | 1  | 1  | 2   | 3.435 | 1.224 | 1.076 | 1.012 | 6.13   | 6.34  | 2  | 2   | 331  | 35.2  | 6.20 |
| P29533   | Vascular cell adhesion protein 1 OS=Mus musculus GN=Vcam1 PE=1 SV=1 -                                                           | 30.99 | 3 | 21 | 21 | 79  | 1.183 | 1.159 | 1.230 | 1.012 | 237.33 | 30.99 | 35 | 79  | 739  | 81.3  | 5.30 |
| Q91VH6   | Protein MEMO1 OS=Mus musculus GN=Memo1 PE=1 SV=1 - [MEMO1_MOUSE]                                                                | 18.86 | 1 | 5  | 5  | 12  | 0.942 | 1.198 | 0.793 | 1.012 | 27.79  | 18.86 | 7  | 12  | 297  | 33.7  | 7.14 |
| Q99J56   | Derlin-1 OS=Mus musculus GN=Derl1 PE=2 SV=1 - [DERL1_MOUSE]                                                                     | 8.76  | 1 | 2  | 2  | 20  | 0.815 | 1.328 | 0.854 | 1.012 | 63.90  | 8.76  | 3  | 20  | 251  | 28.8  | 9.51 |
| Q68FM6   | Protein phosphatase 1 regulatory subunit 29 OS=Mus musculus GN=Elfn2 PE=1 SV=1 - [PPR29_MOUSE]                                  | 28.80 | 1 | 16 | 19 | 77  | 0.881 | 1.303 | 1.228 | 1.012 | 234.01 | 28.80 | 33 | 77  | 823  | 90.0  | 7.52 |
| O70252   | Heme oxygenase 2 OS=Mus musculus GN=Hmox2 PE=2 SV=1 - [HMOX2_MOUSE]                                                             | 58.41 | 4 | 14 | 15 | 57  | 0.640 | 1.075 | 0.902 | 1.012 | 181.38 | 58.41 | 27 | 57  | 315  | 35.7  | 5.87 |



|          |                                                                                                                           |       |    |    |    |     |       |       |       |       |         |       |    |     |      |       |      |
|----------|---------------------------------------------------------------------------------------------------------------------------|-------|----|----|----|-----|-------|-------|-------|-------|---------|-------|----|-----|------|-------|------|
| F6QKK2   | ADP-ribosylation factor-like protein 8A (Fragment)<br>OS=Mus musculus<br>GN=Ar18a PE=4 SV=1 - [F6QKK2_MOUSE]              | 56.36 | 2  | 3  | 8  | 31  | 0.704 | 0.724 | 0.869 | 1.012 | 81.18   | 56.36 | 14 | 31  | 165  | 18.9  | 8.16 |
| Q99NE5-5 | Isoform 5 of Regulating synaptic membrane exocytosis protein 1<br>OS=Mus musculus<br>GN=Rims1 - [RIMS1_MOUSE]             | 41.33 | 13 | 15 | 44 | 138 | 0.687 | 1.199 | 1.296 | 1.012 | 446.11  | 41.33 | 74 | 138 | 1350 | 150.6 | 9.13 |
| R4GMK9   | MCG7133 OS=Mus musculus GN=Zfp618 PE=4 SV=1 - [R4GMK9_MOUSE]                                                              | 2.94  | 3  | 1  | 1  | 2   | 1.316 | 1.056 | 1.052 | 1.012 | 1.71    | 2.94  | 1  | 2   | 374  | 41.1  | 6.81 |
| B1ARW4   | NADH dehydrogenase [ubiquinone] iron-sulfur protein 5 (Fragment)<br>OS=Mus musculus<br>GN=Ndufs5 PE=2 SV=1 - [NDF5_MOUSE] | 60.44 | 2  | 7  | 7  | 109 | 1.597 | 0.478 | 1.314 | 1.012 | 345.03  | 60.44 | 14 | 109 | 91   | 10.9  | 8.94 |
| Q60660   | Killer cell lectin-like receptor 2 OS=Mus musculus GN=Klra2 PE=2 SV=1 - [KLRA2_MOUSE]                                     | 3.13  | 3  | 1  | 1  | 1   | 2.158 | 1.508 | 0.970 | 1.012 | 2.41    | 3.13  | 1  | 1   | 288  | 33.6  | 8.09 |
| O35730   | E3 ubiquitin-protein ligase RING1 OS=Mus musculus GN=Ring1 PE=1 SV=2 - [RING1_MOUSE]                                      | 13.30 | 3  | 2  | 3  | 6   | 0.583 | 0.840 | 0.862 | 1.012 | 18.01   | 13.30 | 5  | 6   | 406  | 42.6  | 5.74 |
| A2A8L5   | Receptor-type tyrosine-protein phosphatase F OS=Mus musculus GN=Ptpfr PE=1 SV=1 - [PTPRF_MOUSE]                           | 29.61 | 1  | 10 | 41 | 145 | 1.108 | 1.136 | 0.863 | 1.012 | 412.87  | 29.61 | 73 | 145 | 1898 | 211.4 | 6.65 |
| Q6GQT6   | Sterol regulatory element-binding protein cleavage-activating protein OS=Mus musculus GN=Scap PE=1 SV=1 - [SCAP_MOUSE]    | 2.51  | 1  | 2  | 2  | 5   | 0.491 | 0.927 | 1.353 | 1.012 | 22.82   | 2.51  | 3  | 5   | 1276 | 139.5 | 7.08 |
| P83887   | Tubulin gamma-1 chain OS=Mus musculus GN=Tubg1 PE=1 SV=1 - [TUBG1_MOUSE]                                                  | 51.44 | 1  | 4  | 16 | 57  | 1.423 | 1.014 | 1.010 | 1.012 | 188.57  | 51.44 | 28 | 57  | 451  | 51.1  | 6.02 |
| Q6P5B0   | RRP12-like protein OS=Mus musculus GN=Rrp12 PE=1 SV=1 - [RRP12_MOUSE]                                                     | 9.96  | 1  | 11 | 11 | 22  | 1.789 | 1.151 | 1.024 | 1.012 | 53.29   | 9.96  | 16 | 22  | 1295 | 143.0 | 8.91 |
| Q99J16   | Ras-related protein Rap-1b OS=Mus musculus GN=Rap1b PE=2 SV=2 - [RAP1B_MOUSE]                                             | 75.00 | 1  | 6  | 12 | 129 | 0.882 | 1.027 | 0.937 | 1.012 | 380.79  | 75.00 | 21 | 129 | 184  | 20.8  | 5.78 |
| Q80VQ1   | Leucine-rich repeat-containing protein 1 OS=Mus musculus GN=Lrrc1 PE=2 SV=2 - [LRRC1_MOUSE]                               | 15.65 | 4  | 6  | 7  | 14  | 1.259 | 0.897 | 0.815 | 1.012 | 33.21   | 15.65 | 10 | 14  | 524  | 59.4  | 5.16 |
| A2AQ87   | SH2 domain-containing adapter protein F (Fragment) OS=Mus musculus GN=Shf PE=2 SV=1 - [A2AQ87_MOUSE]                      | 27.80 | 7  | 7  | 7  | 22  | 0.995 | 1.057 | 1.461 | 1.013 | 72.88   | 27.80 | 11 | 22  | 446  | 47.1  | 5.64 |
| E9Q6A6   | Collagen alpha-4(VI) chain OS=Mus musculus GN=Col6a6 PE=2 SV=2 - [E9Q6A6_MOUSE]                                           | 2.38  | 3  | 4  | 4  | 4   | 0.688 | 0.670 | 0.863 | 1.013 | 4.37    | 2.38  | 4  | 4   | 2265 | 246.3 | 6.90 |
| Q5DTL9   | Sodium-driven chloride bicarbonate exchanger OS=Mus musculus GN=Slc4a10 PE=1 SV=2 - [S4A10_MOUSE]                         | 26.57 | 1  | 18 | 25 | 104 | 0.572 | 1.106 | 1.186 | 1.013 | 298.24  | 26.57 | 44 | 104 | 1118 | 125.7 | 6.51 |
| Q8BJU9   | Peptide chain release factor 1-like, mitochondrial OS=Mus musculus GN=Mtrf1l PE=2 SV=1 - [RF1ML_MOUSE]                    | 22.79 | 1  | 6  | 7  | 14  | 1.740 | 0.997 | 0.902 | 1.013 | 40.97   | 22.79 | 11 | 14  | 373  | 42.2  | 8.16 |
| P28738   | Kinesin heavy chain isoform 5C OS=Mus musculus GN=Kif5c PE=1 SV=3 - [KIF5C_MOUSE]                                         | 48.74 | 3  | 32 | 48 | 312 | 1.239 | 0.969 | 1.279 | 1.013 | 960.79  | 48.74 | 87 | 312 | 956  | 109.2 | 6.19 |
| O35465   | Peptidyl-prolyl cis-trans isomerase FKBP8 OS=Mus musculus GN=Fkbp8 PE=1 SV=2 - [FKBP8_MOUSE]                              | 28.86 | 2  | 1  | 11 | 57  | 0.788 | 0.651 | 0.940 | 1.013 | 182.29  | 28.86 | 19 | 57  | 402  | 43.5  | 5.16 |
| Q8BFR4   | N-acetylglucosamine-6-sulfatase OS=Mus musculus GN=Gns PE=2 SV=1 - [GNS_MOUSE]                                            | 17.10 | 1  | 9  | 9  | 26  | 1.300 | 1.180 | 1.060 | 1.013 | 68.42   | 17.10 | 16 | 26  | 544  | 61.1  | 8.24 |
| Q91VJ2   | Protein kinase C delta-binding protein OS=Mus musculus GN=Prkcdp PE=1 SV=1 - [PRDBP_MOUSE]                                | 15.77 | 1  | 4  | 4  | 9   | 0.840 | 1.850 | 0.876 | 1.013 | 26.33   | 15.77 | 8  | 9   | 260  | 27.8  | 5.57 |
| Q62189   | U1 small nuclear ribonucleoprotein A OS=Mus musculus GN=Snrpa PE=2 SV=3 - [SNRPA_MOUSE]                                   | 39.72 | 4  | 8  | 10 | 66  | 0.949 | 0.853 | 1.048 | 1.013 | 177.28  | 39.72 | 17 | 66  | 287  | 31.8  | 9.80 |
| Q8BLR2   | Copine-4 OS=Mus musculus GN=Cpne4 PE=1 SV=1 - [CPNE4_MOUSE]                                                               | 31.96 | 4  | 15 | 16 | 77  | 1.443 | 1.640 | 1.198 | 1.013 | 196.26  | 31.96 | 24 | 77  | 557  | 62.4  | 6.33 |
| P18760   | Cofilin-1 OS=Mus musculus GN=Cfl1 PE=1 SV=3 - [COF1_MOUSE]                                                                | 87.35 | 1  | 1  | 23 | 591 | 1.394 | 1.051 | 1.112 | 1.013 | 1516.11 | 87.35 | 42 | 591 | 166  | 18.5  | 8.09 |
| Q80YE7-2 | Isoform 2 of Death-associated protein kinase 1 OS=Mus musculus GN=Dapk1 -                                                 | 8.74  | 4  | 10 | 11 | 18  | 1.152 | 1.400 | 1.416 | 1.013 | 48.06   | 8.74  | 16 | 18  | 1430 | 159.9 | 6.92 |

|          |                                                                                                                                          |       |   |    |    |      |       |       |       |       |         |       |    |      |      |       |       |
|----------|------------------------------------------------------------------------------------------------------------------------------------------|-------|---|----|----|------|-------|-------|-------|-------|---------|-------|----|------|------|-------|-------|
| Q8BRM2   | RAB6-interacting golgin<br>OS=Mus musculus<br>GN=Gorab PE=1 SV=1 -<br>[GORAB_MOUSE]                                                      | 28.53 | 2 | 8  | 8  | 12   | 1.328 | 0.705 | 1.346 | 1.013 | 25.80   | 28.53 | 12 | 12   | 368  | 41.5  | 7.36  |
| Q9QYJ3   | DnaJ homolog subfamily B<br>member 1 OS=Mus<br>musculus GN=Dnajb1<br>PE=2 SV=3 -                                                         | 28.82 | 1 | 9  | 10 | 43   | 1.155 | 0.962 | 1.121 | 1.013 | 128.02  | 28.82 | 17 | 43   | 340  | 38.1  | 8.63  |
| Q8BK03   | Protein FAM73B OS=Mus<br>musculus GN=Fam73b<br>PE=1 SV=1 -<br>[FA73B_MOUSE]                                                              | 28.50 | 6 | 11 | 12 | 37   | 0.731 | 0.771 | 0.764 | 1.013 | 97.93   | 28.50 | 20 | 37   | 593  | 65.5  | 5.41  |
| A3KGG9   | Dehydrodolichyl<br>diphosphate synthase<br>(Fragment) OS=Mus<br>musculus GN=Dhdds<br>PE=2 SV=1 -                                         | 6.55  | 5 | 1  | 1  | 2    | 1.200 | 0.874 | 0.921 | 1.013 | 0.00    | 6.55  | 2  | 2    | 168  | 19.4  | 9.10  |
| C3VPR6   | Protein NLRCS OS=Mus<br>musculus GN=NlrCS PE=1<br>SV=2 - [NLRCS_MOUSE]                                                                   | 3.71  | 2 | 4  | 4  | 4    | 1.741 | 1.316 | 1.008 | 1.013 | 8.37    | 3.71  | 4  | 4    | 1915 | 211.6 | 6.38  |
| Q99M28   | RNA-binding protein with<br>serine-rich domain 1<br>OS=Mus musculus<br>GN=Rnps1 PE=2 SV=1 -<br>[RNPS1_MOUSE]                             | 10.82 | 3 | 2  | 3  | 6    | 1.343 | 0.719 | 0.972 | 1.013 | 17.38   | 10.82 | 3  | 6    | 305  | 34.2  | 11.84 |
| Q8BI21   | Ankyrin repeat and sterile<br>alpha motif domain-<br>containing protein 1B<br>OS=Mus musculus<br>GN=Anks1b PE=1 SV=3 -<br>[ANKS1B_MOUSE] | 23.35 | 6 | 10 | 28 | 87   | 0.668 | 0.780 | 1.181 | 1.013 | 235.55  | 23.35 | 45 | 87   | 1259 | 139.0 | 6.29  |
| O35066   | Kinesin-like protein KIF3C<br>OS=Mus musculus<br>GN=Kif3c PE=2 SV=3 -<br>[KIF3C_MOUSE]                                                   | 28.39 | 2 | 15 | 20 | 47   | 1.434 | 0.915 | 1.134 | 1.013 | 124.07  | 28.39 | 31 | 47   | 796  | 89.9  | 8.06  |
| Q924T2   | 28S ribosomal protein S2,<br>mitochondrial OS=Mus<br>musculus GN=Mrps2 PE=2<br>SV=1 - [RT02_MOUSE]                                       | 20.27 | 1 | 4  | 5  | 19   | 0.829 | 0.730 | 0.945 | 1.013 | 57.73   | 20.27 | 9  | 19   | 291  | 32.3  | 9.14  |
| P57774   | Pro-neuropeptide Y<br>OS=Mus musculus<br>GN=Npy PE=2 SV=2 -<br>[NPY_MOUSE]                                                               | 28.87 | 1 | 3  | 3  | 23   | 2.218 | 1.816 | 1.311 | 1.013 | 66.32   | 28.87 | 5  | 23   | 97   | 10.9  | 7.12  |
| Q3TVF4   | Geranylgeranyl transferase<br>type-2 subunit beta<br>OS=Mus musculus<br>GN=Rabggb PE=2 SV=1 -<br>[Q3TVF4_MOUSE]                          | 14.50 | 2 | 4  | 4  | 13   | 1.090 | 1.133 | 0.959 | 1.014 | 33.23   | 14.50 | 6  | 13   | 331  | 36.9  | 5.08  |
| Q8BF23   | Beta-actin-like protein 2<br>OS=Mus musculus<br>GN=Actb2 PE=1 SV=1 -<br>[ACTB2_MOUSE]                                                    | 49.47 | 1 | 4  | 18 | 1798 | 1.096 | 1.252 | 1.002 | 1.014 | 5511.01 | 49.47 | 29 | 1798 | 376  | 42.0  | 5.49  |
| Q68ED2   | Metabotropic glutamate<br>receptor 7 OS=Mus<br>musculus GN=Grm7 PE=1<br>SV=1 - [GRM7_MOUSE]                                              | 24.04 | 6 | 16 | 18 | 51   | 0.737 | 1.068 | 1.107 | 1.014 | 171.23  | 24.04 | 29 | 51   | 915  | 102.2 | 7.88  |
| Q80W04   | Transmembrane and coiled<br>coil domains protein 2<br>OS=Mus musculus<br>GN=Tmcc2 PE=1 SV=1 -<br>[TMCC2_MOUSE]                           | 32.72 | 3 | 15 | 17 | 65   | 0.878 | 0.960 | 1.033 | 1.014 | 169.49  | 32.72 | 30 | 65   | 706  | 77.0  | 6.84  |
| Q8C7I4   | Protein Apo9a OS=Mus<br>musculus GN=Apol9b<br>PE=2 SV=1 -<br>[Q8C7I4_MOUSE]                                                              | 3.87  | 2 | 1  | 1  | 1    | 1.522 | 0.050 | 1.281 | 1.014 | 1.87    | 3.87  | 1  | 1    | 310  | 33.4  | 6.98  |
| P32648   | VIP peptides OS=Mus<br>musculus GN=Vip PE=1<br>SV=1 - [VIP_MOUSE]                                                                        | 41.18 | 1 | 5  | 5  | 14   | 1.475 | 1.638 | 1.616 | 1.014 | 40.80   | 41.18 | 7  | 14   | 170  | 19.0  | 6.60  |
| Q3UFK8   | FERM domain-containing<br>protein 8 OS=Mus<br>musculus GN=Frdm8<br>PE=1 SV=2 -                                                           | 16.95 | 2 | 7  | 7  | 21   | 0.904 | 0.493 | 0.808 | 1.014 | 61.68   | 16.95 | 13 | 21   | 466  | 51.8  | 6.44  |
| G3X922   | MCG115602 OS=Mus<br>musculus GN=Dnajc13<br>PE=4 SV=1 -<br>[G3X922_MOUSE]                                                                 | 18.77 | 1 | 39 | 40 | 94   | 0.618 | 1.149 | 0.918 | 1.014 | 268.38  | 18.77 | 64 | 94   | 2243 | 254.3 | 6.77  |
| Q3U182   | CREB-regulated<br>transcription coactivator 2<br>OS=Mus musculus<br>GN=Crtc2 PE=1 SV=2 -<br>[CRTC2_MOUSE]                                | 9.10  | 1 | 5  | 5  | 10   | 1.289 | 1.277 | 1.224 | 1.014 | 22.80   | 9.10  | 7  | 10   | 692  | 73.2  | 7.01  |
| Q8C079-3 | Isoform 3 of Striatin-<br>interacting protein 1<br>OS=Mus musculus<br>GN=Strip1 -                                                        | 23.49 | 4 | 12 | 14 | 55   | 0.915 | 1.251 | 0.952 | 1.014 | 155.99  | 23.49 | 24 | 55   | 762  | 86.8  | 5.66  |
| P63058-3 | Isoform Alpha-3 of Thyroid<br>hormone receptor alpha<br>OS=Mus musculus<br>GN=Thra - [THA_MOUSE]                                         | 4.42  | 2 | 2  | 2  | 11   | 1.078 | 1.262 | 1.103 | 1.014 | 25.66   | 4.42  | 4  | 11   | 453  | 50.9  | 7.36  |
| P0DJF2   | Protein PET117 homolog,<br>mitochondrial OS=Mus<br>musculus GN=Pett17<br>PE=3 SV=1<br>[PT117_MOUSE]                                      | 12.50 | 1 | 1  | 1  | 2    | 0.803 | 0.862 | 1.151 | 1.014 | 6.27    | 12.50 | 2  | 2    | 80   | 9.1   | 10.35 |
| Q8VE88-2 | Isoform 2 of Protein<br>FAM114A2 OS=Mus<br>musculus GN=Fam114a2 -<br>[F1142_MOUSE]                                                       | 24.29 | 2 | 10 | 10 | 28   | 0.847 | 1.555 | 1.057 | 1.014 | 93.05   | 24.29 | 16 | 28   | 490  | 53.3  | 4.89  |
| P16045   | Galectin-1 OS=Mus<br>musculus GN=Lgals1<br>PE=1 SV=3 -<br>[LEG1_MOUSE]                                                                   | 43.70 | 1 | 5  | 5  | 53   | 1.795 | 1.767 | 1.019 | 1.014 | 181.13  | 43.70 | 10 | 53   | 135  | 14.9  | 5.49  |
| P24668   | Cation-dependent<br>mannose-6-phosphate<br>receptor OS=Mus<br>musculus GN=M6pr PE=1<br>SV=1 - [MPRD_MOUSE]                               | 25.18 | 1 | 8  | 8  | 30   | 0.811 | 1.139 | 0.885 | 1.014 | 113.56  | 25.18 | 12 | 30   | 278  | 31.2  | 5.39  |

|          |                                                                                                                 |       |    |    |    |      |       |       |       |       |         |       |     |      |      |       |      |
|----------|-----------------------------------------------------------------------------------------------------------------|-------|----|----|----|------|-------|-------|-------|-------|---------|-------|-----|------|------|-------|------|
| Q8VE99   | Coiled-coil domain-containing protein 115<br>OS=Mus musculus<br>GN=Ccdc115 PE=2 SV=1 - [CC115_MOUSE]            | 18.33 | 1  | 3  | 3  | 4    | 1.504 | 0.958 | 0.754 | 1.014 | 10.29   | 18.33 | 4   | 4    | 180  | 19.7  | 8.81 |
| E9Q3M3   | Dynactin subunit 1<br>OS=Mus musculus<br>GN=Dctn1 PE=2 SV=1 - [E9Q3M3_MOUSE]                                    | 51.19 | 9  | 51 | 53 | 316  | 0.788 | 0.913 | 1.046 | 1.014 | 1034.59 | 51.19 | 99  | 316  | 1264 | 139.7 | 5.71 |
| Q3USJ8   | FCH and double SH3 domains protein 2<br>OS=Mus musculus<br>GN=Fchsd2 PE=1 SV=2 - [FCSD2_MOUSE]                  | 22.70 | 3  | 13 | 13 | 51   | 1.485 | 1.165 | 0.953 | 1.014 | 137.34  | 22.70 | 20  | 51   | 740  | 84.2  | 5.66 |
| Q91V12-2 | Isoform A of Cytosolic acyl coenzyme A thioester hydrolase<br>OS=Mus musculus<br>GN=Acot7 - [BACH_MOUSE]        | 58.28 | 5  | 15 | 15 | 136  | 0.858 | 0.734 | 0.840 | 1.014 | 401.47  | 58.28 | 27  | 136  | 338  | 37.5  | 7.52 |
| E9PYJ6   | Focadhesin<br>OS=Mus musculus<br>GN=Focad PE=2 SV=1 - [E9PYJ6_MOUSE]                                            | 4.21  | 4  | 6  | 7  | 13   | 0.685 | 0.785 | 0.760 | 1.014 | 30.85   | 4.21  | 12  | 13   | 1712 | 189.4 | 6.90 |
| P26049   | Gamma-aminobutyric acid receptor subunit alpha-3<br>OS=Mus musculus<br>GN=Gabra3 PE=1 SV=1 - [GBRA3_MOUSE]      | 29.67 | 2  | 13 | 15 | 56   | 0.855 | 1.106 | 1.180 | 1.014 | 142.82  | 29.67 | 26  | 56   | 492  | 55.4  | 8.94 |
| Q9DBS5   | Kinesin light chain 4<br>OS=Mus musculus<br>GN=Klc4 PE=1 SV=1 - [KLC4_MOUSE]                                    | 31.99 | 1  | 11 | 17 | 75   | 0.969 | 0.862 | 1.048 | 1.014 | 200.33  | 31.99 | 31  | 75   | 619  | 68.6  | 6.09 |
| Q9CY16   | 28S ribosomal protein S28, mitochondrial<br>OS=Mus musculus<br>GN=Mps28 PE=2 SV=1 - [RT28_MOUSE]                | 32.26 | 1  | 5  | 5  | 11   | 0.381 | 0.912 | 0.960 | 1.015 | 33.44   | 32.26 | 8   | 11   | 186  | 20.5  | 8.92 |
| Q3V0G7-2 | Isoform 2 of GTPase-activating Rap/Ran-GAP domain-like protein 3<br>OS=Mus musculus<br>GN=Garn3 - [GARN3_MOUSE] | 19.54 | 5  | 12 | 13 | 29   | 0.820 | 0.929 | 1.060 | 1.015 | 85.57   | 19.54 | 19  | 29   | 993  | 110.5 | 7.25 |
| Q9WW85   | Nucleoside diphosphate kinase 3<br>OS=Mus musculus<br>GN=Nme3 PE=2 SV=3 - [NDK3_MOUSE]                          | 63.31 | 1  | 10 | 10 | 24   | 0.687 | 1.012 | 0.698 | 1.015 | 42.87   | 63.31 | 16  | 24   | 169  | 19.1  | 6.68 |
| Q6DVA0   | LEM domain-containing protein 2<br>OS=Mus musculus<br>GN=Lemd2 PE=1 SV=1 - [LEM2_MOUSE]                         | 16.63 | 1  | 8  | 8  | 15   | 1.021 | 1.305 | 0.981 | 1.015 | 43.65   | 16.63 | 12  | 15   | 511  | 57.5  | 9.01 |
| Q91WK5   | Glycine cleavage system H protein, mitochondrial<br>OS=Mus musculus<br>GN=Gcsh PE=1 SV=2 - [GCSH_MOUSE]         | 39.41 | 1  | 3  | 3  | 13   | 1.380 | 0.806 | 1.013 | 1.015 | 50.56   | 39.41 | 4   | 13   | 170  | 18.6  | 4.75 |
| Q3UTR7   | Angiotensinogen<br>OS=Mus musculus<br>GN=Agt PE=2 SV=1 - [Q3UTR7_MOUSE]                                         | 23.03 | 1  | 1  | 9  | 39   | 1.380 | 0.486 | 0.604 | 1.015 | 107.61  | 23.03 | 17  | 39   | 482  | 52.6  | 5.54 |
| P10493   | Nidogen-1<br>OS=Mus musculus<br>GN=Nid1 PE=1 SV=2 - [NID1_MOUSE]                                                | 22.81 | 1  | 24 | 24 | 76   | 1.408 | 1.276 | 0.818 | 1.015 | 227.33  | 22.81 | 44  | 76   | 1245 | 136.5 | 5.44 |
| G5E897   | KDEL (Lys-Asp-Glu-Leu) containing 2, isoform CRA_b<br>OS=Mus musculus<br>GN=Kdelc2 PE=4 SV=1 - [G5E897_MOUSE]   | 8.75  | 1  | 3  | 4  | 6    | 0.737 | 1.100 | 0.711 | 1.015 | 13.88   | 8.75  | 5   | 6    | 503  | 57.6  | 7.74 |
| Q80TS3-5 | Isoform 5 of Latrophilin-3<br>OS=Mus musculus<br>GN=Lphn3 - [LPHN3_MOUSE]                                       | 29.91 | 23 | 39 | 40 | 159  | 0.901 | 1.436 | 1.139 | 1.015 | 494.30  | 29.91 | 71  | 159  | 1528 | 169.8 | 6.74 |
| Q8R1N4   | NudC domain-containing protein 3<br>OS=Mus musculus<br>GN=Nuddc3 PE=2 SV=3 - [NUDDC3_MOUSE]                     | 30.30 | 5  | 9  | 9  | 39   | 1.272 | 0.982 | 0.885 | 1.015 | 108.19  | 30.30 | 14  | 39   | 363  | 40.9  | 5.26 |
| P61027   | Ras-related protein Rab-10<br>OS=Mus musculus<br>GN=Rab10 PE=1 SV=1 - [RAB10_MOUSE]                             | 76.00 | 1  | 11 | 16 | 183  | 0.778 | 0.876 | 0.894 | 1.015 | 525.81  | 76.00 | 28  | 183  | 200  | 22.5  | 8.38 |
| Q7TT23   | Uncharacterized protein C20orf194 homolog<br>OS=Mus musculus<br>GN=Ct194 PE=2 SV=2 - [CT194_MOUSE]              | 5.77  | 3  | 4  | 4  | 6    | 1.075 | 0.901 | 0.824 | 1.015 | 15.98   | 5.77  | 5   | 6    | 1179 | 132.1 | 6.43 |
| Q8K1J6   | CCA tRNA, nucleotidyltransferase 1, mitochondrial<br>OS=Mus musculus<br>GN=Tmt1 PE=2 SV=1 - [TRNT1_MOUSE]       | 37.10 | 2  | 16 | 16 | 44   | 0.738 | 0.878 | 0.912 | 1.015 | 114.60  | 37.10 | 28  | 44   | 434  | 49.9  | 8.56 |
| G3UW55   | MCG14937<br>OS=Mus musculus<br>GN=A230065H16Rik PE=4 SV=1 - [G3UW55_MOUSE]                                      | 75.44 | 1  | 5  | 5  | 32   | 1.261 | 1.980 | 1.074 | 1.015 | 66.22   | 75.44 | 8   | 32   | 114  | 11.4  | 4.75 |
| P63017   | Heat shock cognate 71 kDa protein<br>OS=Mus musculus<br>GN=Hspa8 PE=1 SV=1 - [HSP7C_MOUSE]                      | 80.80 | 4  | 35 | 54 | 2120 | 1.121 | 1.028 | 0.962 | 1.015 | 6346.71 | 80.80 | 102 | 2120 | 646  | 70.8  | 5.52 |
| P59999   | Actin-related protein 2/3 complex subunit 4<br>OS=Mus musculus<br>GN=Arpc4 PE=1 SV=3 - [ARPC4_MOUSE]            | 55.95 | 2  | 8  | 8  | 44   | 0.560 | 1.314 | 1.101 | 1.015 | 122.91  | 55.95 | 13  | 44   | 168  | 19.7  | 8.43 |
| Q8BTG7-3 | Isoform 3 of Protein NDRG4<br>OS=Mus musculus<br>GN=Ndr4 - [NDRG4_MOUSE]                                        | 48.02 | 5  | 13 | 14 | 88   | 1.006 | 0.906 | 0.933 | 1.015 | 279.19  | 48.02 | 23  | 88   | 404  | 44.4  | 6.23 |

|          |                                                                                                                  |       |   |    |    |      |       |       |       |       |         |       |    |      |      |       |      |
|----------|------------------------------------------------------------------------------------------------------------------|-------|---|----|----|------|-------|-------|-------|-------|---------|-------|----|------|------|-------|------|
| Q5XG69   | Soluble lamin-associated protein of 75 kDa OS=Mus musculus GN=Fam169a PE=1 SV=3 - [F169A_MOUSE]                  | 8.57  | 1 | 5  | 5  | 20   | 0.649 | 0.806 | 0.945 | 1.015 | 53.76   | 8.57  | 10 | 20   | 665  | 73.2  | 4.68 |
| Q9Z1S8   | GRB2-associated-binding protein 2 OS=Mus musculus GN=Gab2 PE=1 SV=2 - [GAB2_MOUSE]                               | 18.95 | 2 | 10 | 10 | 23   | 1.402 | 0.871 | 1.166 | 1.016 | 61.38   | 18.95 | 15 | 23   | 665  | 73.2  | 8.31 |
| P17742   | Peptidyl-prolyl cis-trans isomerase A OS=Mus musculus GN=Ppia PE=1 SV=2 - [PPIA_MOUSE]                           | 73.78 | 2 | 15 | 16 | 1072 | 1.518 | 1.013 | 1.295 | 1.016 | 2735.23 | 73.78 | 29 | 1072 | 164  | 18.0  | 7.90 |
| B2RQ71   | Dip2c protein OS=Mus musculus GN=Dip2c PE=2 SV=1 - [B2RQ71_MOUSE]                                                | 23.52 | 2 | 1  | 30 | 90   | 1.866 | 0.567 | 1.126 | 1.016 | 257.96  | 23.52 | 51 | 90   | 1556 | 170.8 | 7.39 |
| Q9D8P4   | 39S ribosomal protein L17, mitochondrial OS=Mus musculus GN=Mrlp17 PE=1 SV=1 - [RML17_MOUSE]                     | 34.09 | 4 | 7  | 7  | 10   | 0.945 | 1.148 | 0.922 | 1.016 | 23.53   | 34.09 | 10 | 10   | 176  | 20.2  | 9.82 |
| Q8VFF4   | MCG58903 OS=Mus musculus GN=Olfir847 PE=3 SV=1 - [Q8VFF4_MOUSE]                                                  | 5.77  | 1 | 1  | 1  | 2    | 4.603 | 1.448 | 1.217 | 1.016 | 2.66    | 5.77  | 1  | 2    | 312  | 34.7  | 8.21 |
| Q8BTY8   | Sec1 family domain-containing protein 2 OS=Mus musculus GN=Scfd2 PE=2 SV=1 - [SCFD2_MOUSE]                       | 17.25 | 5 | 11 | 11 | 26   | 0.672 | 0.843 | 0.807 | 1.016 | 68.32   | 17.25 | 20 | 26   | 684  | 74.7  | 6.81 |
| P35290   | Ras-related protein Rab-24 OS=Mus musculus GN=Rab24 PE=1 SV=2 - [RAB24_MOUSE]                                    | 36.45 | 1 | 7  | 7  | 19   | 0.836 | 1.019 | 0.894 | 1.016 | 56.54   | 36.45 | 13 | 19   | 203  | 23.1  | 6.23 |
| E9QAG7   | E3 ubiquitin-protein ligase makorin-1 OS=Mus musculus GN=Mkrn1 PE=2 SV=1 - [E9QAG7_MOUSE]                        | 6.71  | 6 | 2  | 3  | 3    | 1.294 | 1.218 | 1.060 | 1.016 | 5.15    | 6.71  | 3  | 3    | 417  | 47.3  | 5.12 |
| M0QWG7   | Probable UDP-sugar transporter protein SLC35A5 (Fragment) OS=Mus musculus GN=Slc35a5 PE=4 SV=1 - [M0QWG7_MOUSE]  | 10.73 | 3 | 2  | 2  | 3    | 1.284 | 0.873 | 1.480 | 1.016 | 6.95    | 10.73 | 3  | 3    | 233  | 27.1  | 9.28 |
| A2AGL3-2 | Isoform 2 of Ryanodine receptor 3 OS=Mus musculus GN=Ryr3 - [RYP3_MOUSE]                                         | 3.79  | 3 | 7  | 14 | 26   | 1.090 | 1.087 | 1.428 | 1.016 | 56.97   | 3.79  | 20 | 26   | 4834 | 547.4 | 5.74 |
| EDCXJ2   | Seipin OS=Mus musculus GN=Bcl2 PE=2 SV=1 - [EDCXJ2_MOUSE]                                                        | 7.51  | 2 | 2  | 2  | 6    | 0.731 | 0.987 | 0.755 | 1.016 | 10.25   | 7.51  | 3  | 6    | 213  | 23.6  | 8.88 |
| Q99LL3   | Carbohydrate sulfotransferase 12 OS=Mus musculus GN=Chst12 PE=2 SV=2 - [Q99LL3_MOUSE]                            | 7.40  | 2 | 2  | 2  | 5    | 0.651 | 0.883 | 0.562 | 1.016 | 15.78   | 7.40  | 4  | 5    | 419  | 49.4  | 7.88 |
| Q3TSR0   | Exostosin-like 2 OS=Mus musculus GN=Extl2 PE=2 SV=1 - [Q3TSR0_MOUSE]                                             | 32.59 | 2 | 8  | 8  | 15   | 1.377 | 1.279 | 1.043 | 1.016 | 44.69   | 32.59 | 11 | 15   | 316  | 35.8  | 8.82 |
| Q8R2Y2   | Cell surface glycoprotein MUC18 OS=Mus musculus GN=Mcam PE=1 SV=1 - [MUC18_MOUSE]                                | 24.85 | 3 | 12 | 12 | 30   | 1.375 | 0.832 | 0.992 | 1.016 | 87.66   | 24.85 | 17 | 30   | 648  | 71.5  | 5.83 |
| Q9R061   | Cytosolic Fe-S cluster assembly factor NUBP2 OS=Mus musculus GN=Nubp2 PE=1 SV=1 - [NUBP2_MOUSE]                  | 18.18 | 1 | 4  | 4  | 9    | 0.915 | 1.087 | 0.973 | 1.016 | 30.35   | 18.18 | 7  | 9    | 275  | 29.5  | 6.52 |
| Q925H0-2 | Isoform 2 of Acid-sensing ion channel 2 OS=Mus musculus GN=Asic2 - [ASIC2_MOUSE]                                 | 7.10  | 1 | 1  | 4  | 5    | 0.888 | 1.151 | 1.108 | 1.016 | 14.30   | 7.10  | 5  | 5    | 563  | 63.2  | 7.11 |
| Q9JKK7   | Tropomodulin-2 OS=Mus musculus GN=Tmod2 PE=1 SV=2 - [TMOD2_MOUSE]                                                | 66.10 | 3 | 18 | 19 | 218  | 1.590 | 1.286 | 1.418 | 1.016 | 659.55  | 66.10 | 34 | 218  | 351  | 39.5  | 5.35 |
| P28571-1 | Isoform GlyT-1A of Sodium and chloride-dependent glycine transporter 1 OS=Mus musculus GN=Slc6a9 - [GLYT1_MOUSE] | 16.43 | 7 | 1  | 9  | 67   | 0.734 | 0.470 | 0.728 | 1.016 | 178.01  | 16.43 | 15 | 67   | 633  | 70.5  | 7.91 |
| Q99K14   | Cyclin-G-associated kinase OS=Mus musculus GN=Gak PE=1 SV=2 - [GAK_MOUSE]                                        | 24.98 | 5 | 25 | 28 | 119  | 0.749 | 1.192 | 1.048 | 1.016 | 316.40  | 24.98 | 48 | 119  | 1305 | 143.6 | 5.73 |
| Q80VD1   | Protein FAM98B OS=Mus musculus GN=Fam98b PE=2 SV=1 - [FAM98B_MOUSE]                                              | 35.43 | 1 | 8  | 10 | 56   | 0.997 | 1.206 | 0.980 | 1.016 | 177.97  | 35.43 | 19 | 56   | 429  | 45.3  | 8.50 |
| O54967-2 | Isoform 2 of Activated CDC42 kinase 1 OS=Mus musculus GN=Tnk2 - [ACK1_MOUSE]                                     | 3.87  | 7 | 3  | 3  | 5    | 1.059 | 0.842 | 1.232 | 1.017 | 14.77   | 3.87  | 5  | 5    | 1008 | 111.6 | 7.31 |
| Q8BU25   | Inactive serine protease PAMR1 OS=Mus musculus GN=Pamr1 PE=2 SV=3 - [PAMR1_MOUSE]                                | 3.61  | 1 | 2  | 2  | 3    | 2.384 | 1.218 | 1.366 | 1.017 | 6.68    | 3.61  | 2  | 3    | 720  | 80.3  | 7.30 |
| Q91W86   | Vacuolar protein sorting-associated protein 11 homolog OS=Mus musculus GN=Vps11 PE=1 SV=3 - [VPS11_MOUSE]        | 34.01 | 1 | 25 | 27 | 64   | 0.840 | 0.926 | 0.917 | 1.017 | 180.99  | 34.01 | 42 | 64   | 941  | 107.7 | 7.01 |
| Q8C080   | Sorting nexin-16 OS=Mus musculus GN=Snx16 PE=2 SV=2 - [SNX16_MOUSE]                                              | 36.92 | 2 | 9  | 9  | 25   | 1.083 | 0.996 | 1.151 | 1.017 | 73.90   | 36.92 | 14 | 25   | 344  | 38.8  | 5.21 |
| Q64237   | Dopamine beta-hydroxylase OS=Mus musculus GN=Dbh PE=2 SV=1 - [DOPO_MOUSE]                                        | 12.56 | 2 | 7  | 7  | 17   | 1.947 | 1.111 | 0.668 | 1.017 | 55.73   | 12.56 | 13 | 17   | 621  | 70.1  | 6.10 |

|          |                                                                                                                        |       |    |    |    |     |       |       |       |       |        |       |    |     |      |       |      |
|----------|------------------------------------------------------------------------------------------------------------------------|-------|----|----|----|-----|-------|-------|-------|-------|--------|-------|----|-----|------|-------|------|
| Q8BP48   | Methionine aminopeptidase 1 OS=Mus musculus GN=Metap1 PE=2 SV=1 -                                                      | 32.38 | 1  | 11 | 11 | 26  | 1.093 | 1.146 | 0.957 | 1.017 | 73.15  | 32.38 | 17 | 26  | 386  | 43.2  | 7.17 |
| Q80ZV0   | Ribonuclease H2 subunit B OS=Mus musculus GN=Rnaseh2b PE=1 SV=2 - [RNH2B_MOUSE]                                        | 8.44  | 2  | 3  | 3  | 3   | 1.082 | 1.300 | 0.743 | 1.017 | 1.72   | 8.44  | 3  | 3   | 308  | 34.7  | 9.45 |
| Q4KMM3   | Oxidation resistance protein 1 OS=Mus musculus GN=Oxr1 PE=1 SV=3 - [OXR1_MOUSE]                                        | 52.31 | 2  | 8  | 38 | 243 | 1.144 | 1.285 | 1.975 | 1.017 | 753.42 | 52.31 | 70 | 243 | 866  | 95.9  | 5.33 |
| Q9CZD3   | Glycine--tRNA ligase OS=Mus musculus GN=Gars PE=1 SV=1 - [SYG_MOUSE]                                                   | 44.17 | 1  | 27 | 27 | 111 | 0.903 | 0.838 | 0.882 | 1.017 | 323.32 | 44.17 | 46 | 111 | 729  | 81.8  | 6.65 |
| Q5SSL4   | Active breakpoint cluster region-related protein OS=Mus musculus GN=Abr PE=2 SV=1 - [ABR_MOUSE]                        | 50.41 | 9  | 32 | 36 | 175 | 0.790 | 1.175 | 0.949 | 1.017 | 526.02 | 50.41 | 63 | 175 | 859  | 97.6  | 6.58 |
| F7AR15   | Protein Nxf7 (Fragment) OS=Mus musculus GN=Nxf7 PE=4 SV=1 - [F7AR15_MOUSE]                                             | 1.26  | 2  | 1  | 1  | 2   | 0.992 | 1.090 | 1.006 | 1.017 | 4.33   | 1.26  | 1  | 2   | 475  | 55.9  | 8.15 |
| Q68EF8   | Rap guanine nucleotide exchange factor-like 1 OS=Mus musculus GN=Rapgef1 PE=2 SV=2 - [RPGFL_MOUSE]                     | 9.21  | 1  | 4  | 4  | 9   | 0.865 | 1.736 | 1.748 | 1.017 | 18.87  | 9.21  | 6  | 9   | 662  | 73.6  | 6.21 |
| P48543   | G protein-activated inward rectifier potassium channel 3 OS=Mus musculus GN=Kcnj9 PE=2 SV=2 - [IRK9_MOUSE]             | 2.29  | 1  | 1  | 1  | 4   | 0.655 | 0.692 | 1.080 | 1.018 | 8.82   | 2.29  | 2  | 4   | 393  | 43.9  | 5.00 |
| Q8VCB2-2 | Isoform 2 of Mediator of RNA polymerase II transcription subunit 25 OS=Mus musculus GN=Med25 - [MEP25_MOUSE]           | 0.97  | 3  | 1  | 1  | 2   | 0.635 | 0.983 | 1.027 | 1.018 | 2.24   | 0.97  | 2  | 2   | 618  | 64.5  | 9.54 |
| Q3V0I2   | Proline-rich protein 7 OS=Mus musculus GN=Prr7 PE=2 SV=1 - [PRR7_MOUSE]                                                | 13.75 | 1  | 2  | 2  | 7   | 1.158 | 1.596 | 1.527 | 1.018 | 16.64  | 13.75 | 4  | 7   | 269  | 30.3  | 8.60 |
| Q9R0H5   | Keratin, type II cytoskeletal 71 OS=Mus musculus GN=Krt71 PE=1 SV=1 - [K2C71_MOUSE]                                    | 4.58  | 1  | 1  | 2  | 12  | 0.877 | 0.929 | 0.917 | 1.018 | 26.12  | 4.58  | 3  | 12  | 524  | 57.3  | 6.99 |
| Q8QZS3   | Folliculin OS=Mus musculus GN=Flcn PE=1 SV=1 - [FLCN_MOUSE]                                                            | 4.49  | 1  | 2  | 2  | 5   | 0.710 | 0.962 | 0.882 | 1.018 | 15.33  | 4.49  | 3  | 5   | 579  | 64.3  | 6.38 |
| Q91WJ0   | Fibroblast growth factor receptor substrate 3 OS=Mus musculus GN=Fr3 PE=1 SV=3 - [FRS3_MOUSE]                          | 26.02 | 1  | 8  | 9  | 32  | 1.131 | 0.907 | 0.898 | 1.018 | 95.09  | 26.02 | 16 | 32  | 492  | 53.9  | 6.95 |
| Q3TPE9   | Ankyrin repeat and MYND domain-containing protein 2 OS=Mus musculus GN=Ankmy2 PE=1 SV=1 - [ANKY2_MOUSE]                | 23.64 | 2  | 10 | 10 | 32  | 0.644 | 1.153 | 0.889 | 1.018 | 88.26  | 23.64 | 18 | 32  | 440  | 48.7  | 6.67 |
| O35595   | Protein patched homolog 2 OS=Mus musculus GN=Ptch2 PE=2 SV=2 - [PTC2_MOUSE]                                            | 3.21  | 2  | 2  | 2  | 3   | 1.457 | 1.343 | 1.162 | 1.018 | 2.53   | 3.21  | 2  | 3   | 1182 | 128.5 | 6.57 |
| P35123   | Ubiquitin carboxyl-terminal hydrolase 4 OS=Mus musculus GN=Usp4 PE=1 SV=3 - [UBP4_MOUSE]                               | 32.54 | 1  | 21 | 22 | 70  | 0.845 | 1.041 | 0.967 | 1.018 | 222.19 | 32.54 | 38 | 70  | 962  | 108.3 | 5.64 |
| Q8R2R9   | AP-3 complex subunit mu-2 OS=Mus musculus GN=Ap3m2 PE=2 SV=1 - [AP3M2_MOUSE]                                           | 47.61 | 3  | 12 | 14 | 75  | 0.475 | 0.991 | 1.052 | 1.018 | 236.96 | 47.61 | 25 | 75  | 418  | 46.9  | 7.56 |
| E9QL31   | Disabled homolog 2 OS=Mus musculus GN=Dab2 PE=2 SV=1 - [E9QL31_MOUSE]                                                  | 30.07 | 10 | 15 | 15 | 50  | 1.211 | 1.235 | 0.967 | 1.018 | 140.92 | 30.07 | 25 | 50  | 745  | 79.9  | 6.51 |
| Q8C483   | Serine--tRNA ligase, cytoplasmic OS=Mus musculus GN=Sars PE=2 SV=1 - [Q8C483_MOUSE]                                    | 55.60 | 4  | 25 | 25 | 91  | 0.858 | 0.906 | 0.951 | 1.018 | 272.65 | 55.60 | 39 | 91  | 536  | 61.1  | 7.43 |
| Q6P5F9   | Exportin-1 OS=Mus musculus GN=Xpo1 PE=1 SV=1 - [XPO1_MOUSE]                                                            | 30.81 | 3  | 28 | 28 | 112 | 0.641 | 1.134 | 0.883 | 1.018 | 325.98 | 30.81 | 49 | 112 | 1071 | 123.0 | 6.07 |
| Q3U9D6   | Exocyst complex component 6 OS=Mus musculus GN=Exoc6 PE=2 SV=1 - [Q3U9D6_MOUSE]                                        | 14.18 | 2  | 11 | 13 | 29  | 0.951 | 1.386 | 1.167 | 1.018 | 64.89  | 14.18 | 22 | 29  | 804  | 93.2  | 6.15 |
| Q3USC7   | Ganglioside-induced differentiation-associated protein 1-like 1 OS=Mus musculus GN=Gdap11 PE=2 SV=1 - [GDAP11_MOUSE]   | 42.78 | 3  | 13 | 14 | 71  | 0.879 | 1.059 | 1.005 | 1.018 | 214.72 | 42.78 | 26 | 71  | 367  | 41.9  | 6.48 |
| Q8K4S1   | 1-phosphatidylinositol 4,5-bisphosphate phosphodiesterase epsilon-1 OS=Mus musculus GN=Plce1 PE=1 SV=3 - [PLCE1_MOUSE] | 0.92  | 1  | 1  | 1  | 1   | 1.782 | 1.532 | 1.513 | 1.018 | 0.00   | 0.92  | 1  | 1   | 2282 | 254.9 | 6.15 |
| Q9ERS6   | X-linked interleukin-1 receptor accessory protein-like 2 OS=Mus musculus GN=Il1rapl2 PE=2 SV=1 - [IRPL2_MOUSE]         | 1.46  | 1  | 1  | 1  | 1   | 1.432 | 1.688 | 0.849 | 1.018 | 2.41   | 1.46  | 1  | 1   | 686  | 78.7  | 6.18 |

|          |                                                                                                                   |       |    |     |     |      |       |       |       |       |         |       |     |      |      |       |       |
|----------|-------------------------------------------------------------------------------------------------------------------|-------|----|-----|-----|------|-------|-------|-------|-------|---------|-------|-----|------|------|-------|-------|
| O35409   | Glutamate carboxypeptidase 2<br>OS=Mus musculus<br>GN=Folh1 PE=2 SV=2 -                                           | 29.12 | 2  | 18  | 18  | 85   | 1.222 | 0.905 | 0.875 | 1.018 | 216.04  | 29.12 | 32  | 85   | 752  | 84.5  | 8.10  |
| O70566   | Protein diaphanous homolog 2 OS=Mus musculus GN=Diaph2 PE=1 SV=2 -                                                | 13.48 | 1  | 15  | 16  | 32   | 0.964 | 1.575 | 1.230 | 1.018 | 75.03   | 13.48 | 22  | 32   | 1098 | 124.8 | 6.92  |
| Q9JHU4   | Cytoplasmic dynein 1 heavy chain 1 OS=Mus musculus GN=Dync1h1 PE=1 SV=2 -                                         | 53.75 | 2  | 227 | 229 | 1502 | 0.628 | 0.801 | 0.932 | 1.018 | 4329.16 | 53.75 | 416 | 1502 | 4644 | 531.7 | 6.42  |
| F6R9G0   | E1A-binding protein p400 (Fragment) OS=Mus musculus GN=Ep400 PE=4 SV=1 - [F6R9G0_MOUSE]                           | 22.15 | 1  | 2   | 5   | 17   | 0.904 | 1.268 | 1.073 | 1.018 | 37.65   | 22.15 | 9   | 17   | 325  | 34.6  | 10.81 |
| Q9D1G3   | Protein-cysteine N-palmitoyltransferase HHAT-like protein OS=Mus musculus GN=Hhat1 PE=1 SV=2 - [HHAT_MOUSE]       | 2.39  | 1  | 1   | 1   | 2    | 1.167 | 1.056 | 1.031 | 1.018 | 5.77    | 2.39  | 2   | 2    | 503  | 56.4  | 6.65  |
| Q5KUJ9   | Vacuolar protein sorting-associated protein 41 homolog OS=Mus musculus GN=Vps41 PE=2 SV=1 - [VPS41_MOUSE]         | 27.08 | 1  | 20  | 21  | 46   | 0.707 | 0.985 | 0.864 | 1.018 | 120.93  | 27.08 | 35  | 46   | 853  | 98.5  | 5.81  |
| Q811T9-2 | Isoform 2 of Disrupted in schizophrenia 1 homolog OS=Mus musculus GN=Disc1 - [DISC1_MOUSE]                        | 6.24  | 5  | 2   | 2   | 3    | 1.500 | 1.048 | 1.292 | 1.019 | 0.00    | 6.24  | 2   | 3    | 850  | 92.6  | 6.15  |
| Q80TR8-4 | Isoform 4 of Protein VPRBP OS=Mus musculus GN=Vprbp - [VPRBP_MOUSE]                                               | 6.13  | 4  | 7   | 7   | 10   | 0.926 | 1.259 | 0.973 | 1.019 | 16.91   | 6.13  | 9   | 10   | 1419 | 159.2 | 6.54  |
| O89051   | Integral membrane protein 2B OS=Mus musculus GN=Itm2b PE=2 SV=1 - [ITM2B_MOUSE]                                   | 45.49 | 1  | 8   | 8   | 28   | 0.691 | 0.704 | 0.928 | 1.019 | 77.88   | 45.49 | 11  | 28   | 266  | 30.2  | 5.30  |
| AZAGR0   | MAP kinase-activating death domain protein OS=Mus musculus GN=MadD PE=2 SV=1 - [AZAGR0_MOUSE]                     | 41.22 | 28 | 52  | 52  | 215  | 0.588 | 1.040 | 1.052 | 1.019 | 628.88  | 41.22 | 88  | 215  | 1577 | 175.0 | 6.07  |
| Q4G5Y1   | Kelch domain-containing protein 2 OS=Mus musculus GN=Kihdc2 PE=2 SV=3 -                                           | 6.16  | 1  | 2   | 2   | 5    | 1.111 | 1.511 | 0.948 | 1.019 | 14.58   | 6.16  | 3   | 5    | 406  | 45.9  | 6.61  |
| Q68FM7   | Protein Arhgef11 OS=Mus musculus GN=Arhgef11 PE=2 SV=1 - [Q68FM7_MOUSE]                                           | 27.71 | 3  | 28  | 29  | 80   | 0.783 | 0.784 | 1.041 | 1.019 | 248.93  | 27.71 | 45  | 80   | 1552 | 171.7 | 5.58  |
| Q8CJF7   | Protein ELYS OS=Mus musculus GN=Ahctf1 PE=1 SV=1 - [ELYS_MOUSE]                                                   | 4.59  | 3  | 7   | 8   | 17   | 1.009 | 1.048 | 1.131 | 1.019 | 55.20   | 4.59  | 13  | 17   | 2243 | 247.5 | 6.55  |
| F8WGX0   | FYVE, RhoGEF and PH domain-containing protein 4 (Fragment) OS=Mus musculus GN=Fgd4 PE=2 SV=1 - [F8WGX0_MOUSE]     | 11.27 | 6  | 6   | 7   | 12   | 1.339 | 1.425 | 0.957 | 1.019 | 40.77   | 11.27 | 11  | 12   | 754  | 85.2  | 5.82  |
| Q8CA44   | ATP synthase subunit s-like protein OS=Mus musculus GN=Atp5s PE=2 SV=1 - [Q8CA44_MOUSE]                           | 8.56  | 2  | 1   | 2   | 5    | 1.134 | 1.093 | 1.086 | 1.019 | 13.62   | 8.56  | 2   | 5    | 257  | 29.2  | 7.80  |
| Q8BK30   | NADH dehydrogenase [ubiquinone] flavoprotein 3, mitochondrial OS=Mus musculus GN=Ndufv3 PE=2 SV=1 - [NDFV3_MOUSE] | 54.81 | 1  | 1   | 6   | 36   | 1.580 | 1.009 | 1.502 | 1.019 | 74.70   | 54.81 | 10  | 36   | 104  | 11.8  | 9.35  |
| Q8BIJ7   | RUN and FYVE domain-containing protein 1 OS=Mus musculus GN=Rufy1 PE=1 SV=1 - [RUFY1_MOUSE]                       | 22.75 | 1  | 16  | 17  | 52   | 1.087 | 1.023 | 1.044 | 1.019 | 148.10  | 22.75 | 29  | 52   | 712  | 80.3  | 5.68  |
| Q8BGU5   | Cyclin-Y OS=Mus musculus GN=Cny PE=1 SV=1 - [CCNY_MOUSE]                                                          | 31.09 | 2  | 7   | 9   | 51   | 0.590 | 1.321 | 1.165 | 1.019 | 142.94  | 31.09 | 15  | 51   | 341  | 39.4  | 7.20  |
| Q8BGG7   | Ubiquitin-associated and SH3 domain-containing protein B OS=Mus musculus GN=Ubash3b PE=1 SV=1 - [UBASH3B_MOUSE]   | 10.34 | 3  | 6   | 6   | 9    | 0.771 | 0.977 | 1.032 | 1.019 | 22.38   | 10.34 | 9   | 9    | 638  | 71.4  | 6.81  |
| Q91VY9   | Zinc finger protein 622 OS=Mus musculus GN=Znf622 PE=2 SV=1 - [ZN622_MOUSE]                                       | 4.62  | 1  | 2   | 2   | 4    | 1.522 | 0.894 | 0.951 | 1.019 | 12.70   | 4.62  | 3   | 4    | 476  | 53.4  | 6.10  |
| O08742   | Platelet glycoprotein V OS=Mus musculus GN=Gp5 PE=2 SV=1 - [GPV_MOUSE]                                            | 5.11  | 2  | 1   | 2   | 2    | 1.424 | 1.467 | 1.016 | 1.019 | 2.06    | 5.11  | 2   | 2    | 567  | 63.4  | 8.97  |
| Q61233   | Plastin-2 OS=Mus musculus GN=Lcp1 PE=1 SV=4 - [PLSL_MOUSE]                                                        | 52.15 | 5  | 19  | 23  | 96   | 2.012 | 0.962 | 0.842 | 1.019 | 315.49  | 52.15 | 36  | 96   | 627  | 70.1  | 5.33  |
| Q9JM63   | ATP-sensitive inward rectifier potassium channel 10 OS=Mus musculus GN=Kcnj10 PE=1 SV=1 - [IRK10_MOUSE]           | 37.99 | 1  | 11  | 11  | 51   | 0.754 | 0.225 | 0.538 | 1.020 | 112.29  | 37.99 | 18  | 51   | 379  | 42.4  | 8.29  |
| Q3TZI6-2 | Isoform 2 of Cyclin-J OS=Mus musculus GN=Ccnj - [CCNJ_MOUSE]                                                      | 3.27  | 2  | 1   | 1   | 1    | 1.771 | 1.054 | 1.098 | 1.020 | 1.68    | 3.27  | 1   | 1    | 367  | 42.1  | 7.34  |

|          |                                                                                                       |       |    |    |    |     |       |       |       |       |        |       |    |     |      |       |      |
|----------|-------------------------------------------------------------------------------------------------------|-------|----|----|----|-----|-------|-------|-------|-------|--------|-------|----|-----|------|-------|------|
| O55135   | Eukaryotic translation initiation factor 6 OS=Mus musculus GN=Eif6 PE=1 SV=2 - [IF6_MOUSE]            | 34.69 | 2  | 6  | 6  | 19  | 1.505 | 0.926 | 0.968 | 1.020 | 59.05  | 34.69 | 9  | 19  | 245  | 26.5  | 4.74 |
| Q5DW34-2 | Isoform 2 of Histone-lysine N-methyltransferase EHMT1 OS=Mus musculus GN=Ehmt1 - [EHMT1_MOUSE]        | 5.71  | 6  | 4  | 4  | 4   | 1.021 | 1.422 | 1.010 | 1.020 | 10.53  | 5.71  | 4  | 4   | 1243 | 136.4 | 5.97 |
| Q9QY15   | ATP-dependent RNA helicase DDX25 OS=Mus musculus GN=Ddx25 PE=1 SV=2 - [DDX25_MOUSE]                   | 13.64 | 4  | 6  | 8  | 18  | 0.742 | 0.954 | 0.917 | 1.020 | 36.64  | 13.64 | 12 | 18  | 484  | 54.8  | 5.99 |
| Q6DFV7   | Nuclear receptor coactivator 7 OS=Mus musculus GN=Ncoa7 PE=2 SV=2 - [NCOA7_MOUSE]                     | 21.53 | 2  | 17 | 19 | 43  | 1.053 | 0.840 | 1.331 | 1.020 | 115.79 | 21.53 | 28 | 43  | 943  | 106.3 | 5.43 |
| P61082   | NEDD8-conjugating enzyme Ubc12 OS=Mus musculus GN=Ube2m PE=2 SV=1 -                                   | 49.73 | 5  | 11 | 11 | 47  | 1.098 | 0.930 | 1.003 | 1.020 | 127.76 | 49.73 | 18 | 47  | 183  | 20.9  | 7.69 |
| E9Q411   | Receptor-type tyrosine-protein phosphatase O OS=Mus musculus GN=Ptpro PE=2 SV=1 - [E9Q411_MOUSE]      | 1.75  | 5  | 1  | 2  | 9   | 1.262 | 1.598 | 0.811 | 1.020 | 20.90  | 1.75  | 4  | 9   | 1198 | 135.1 | 5.92 |
| Q80YQ8   | Protein RMD5 homolog A OS=Mus musculus GN=Rmd5a PE=2 SV=2 - [RMD5A_MOUSE]                             | 30.95 | 3  | 10 | 11 | 30  | 0.758 | 1.124 | 1.025 | 1.020 | 97.62  | 30.95 | 17 | 30  | 391  | 44.0  | 6.06 |
| Q9JJY3   | Sphingomyelin phosphodiesterase 3 OS=Mus musculus GN=Smpd3 PE=1 SV=1 -                                | 16.03 | 1  | 9  | 9  | 21  | 0.407 | 0.940 | 1.418 | 1.020 | 70.85  | 16.03 | 12 | 21  | 655  | 71.2  | 5.88 |
| Q61086   | Frizzled-3 OS=Mus musculus GN=Fzd3 PE=1 SV=1 - [FZD3_MOUSE]                                           | 5.56  | 1  | 2  | 2  | 2   | 1.097 | 1.241 | 0.878 | 1.020 | 7.58   | 5.56  | 2  | 2   | 666  | 76.2  | 7.64 |
| Q9WVA4   | Transgelin-2 OS=Mus musculus GN=Tagln2 PE=1 SV=4 - [TAGL2_MOUSE]                                      | 55.28 | 1  | 9  | 11 | 137 | 1.427 | 1.607 | 0.790 | 1.020 | 417.05 | 55.28 | 21 | 137 | 199  | 22.4  | 8.24 |
| Q8VBUS   | Phosphodiesterase 4B OS=Mus musculus GN=Pde4b PE=2 SV=1 - [Q8VBUS_MOUSE]                              | 39.94 | 13 | 21 | 26 | 113 | 0.852 | 0.883 | 1.123 | 1.020 | 316.65 | 39.94 | 50 | 113 | 721  | 82.0  | 5.63 |
| Q8CG03   | cGMP-specific 3',5'-cyclic phosphodiesterase OS=Mus musculus GN=Pdesa PE=1 SV=2 - [PDESA_MOUSE]       | 2.20  | 1  | 2  | 2  | 3   | 0.819 | 1.537 | 0.981 | 1.020 | 4.93   | 2.20  | 3  | 3   | 865  | 98.3  | 6.05 |
| Q9D883   | Splicing factor U2AF 35 kDa subunit OS=Mus musculus GN=U2af1 PE=1 SV=4 - [U2AF1_MOUSE]                | 30.13 | 2  | 4  | 5  | 39  | 0.629 | 1.114 | 0.879 | 1.020 | 111.54 | 30.13 | 9  | 39  | 239  | 27.8  | 8.81 |
| Q9DAR7   | m7GpppX diphosphatase OS=Mus musculus GN=Dcps PE=1 SV=1 - [DCPS_MOUSE]                                | 30.47 | 3  | 9  | 9  | 23  | 1.652 | 1.067 | 0.863 | 1.020 | 64.07  | 30.47 | 16 | 23  | 338  | 39.0  | 6.48 |
| Q9D0R4   | Probable ATP-dependent RNA helicase DDX56 OS=Mus musculus GN=Ddx56 PE=2 SV=1 - [DDX56_MOUSE]          | 5.68  | 2  | 2  | 3  | 5   | 0.778 | 0.822 | 1.005 | 1.020 | 15.06  | 5.68  | 4  | 5   | 546  | 61.2  | 9.17 |
| I3ITR1   | MCG50313 OS=Mus musculus GN=AK157302 PE=4 SV=1 - [I3ITR1_MOUSE]                                       | 50.39 | 2  | 5  | 5  | 20  | 1.193 | 0.900 | 0.974 | 1.020 | 59.10  | 50.39 | 9  | 20  | 129  | 14.2  | 8.85 |
| Q3TDX9   | U4/U6.U5 tri-snRNP-associated protein 2 OS=Mus musculus GN=Usp39 PE=2 SV=2 - [SNUT2_MOUSE]            | 16.49 | 1  | 7  | 7  | 21  | 0.963 | 0.943 | 0.891 | 1.020 | 54.62  | 16.49 | 11 | 21  | 564  | 65.1  | 8.90 |
| P46656   | Adrenodoxin, mitochondrial OS=Mus musculus GN=Fdx1 PE=2 SV=1 - [ADX_MOUSE]                            | 28.72 | 1  | 5  | 5  | 11  | 2.735 | 0.955 | 1.297 | 1.020 | 29.00  | 28.72 | 6  | 11  | 188  | 20.1  | 5.62 |
| Q9D8S9   | Bola-like protein 1 OS=Mus musculus GN=Bola1 PE=1 SV=1 - [BOLA1_MOUSE]                                | 74.45 | 1  | 8  | 8  | 42  | 2.189 | 0.982 | 1.364 | 1.020 | 157.37 | 74.45 | 15 | 42  | 137  | 14.4  | 8.76 |
| B1A506   | Disks large-associated protein 3 OS=Mus musculus GN=Dlgap3 PE=2 SV=1 -                                | 33.44 | 2  | 23 | 24 | 137 | 0.714 | 1.341 | 1.679 | 1.021 | 406.24 | 33.44 | 42 | 137 | 966  | 104.6 | 8.81 |
| P28658   | Ataxin-10 OS=Mus musculus GN=Abxn10 PE=1 SV=2 - [ATX10_MOUSE]                                         | 46.74 | 1  | 20 | 21 | 99  | 0.715 | 0.929 | 0.688 | 1.021 | 261.45 | 46.74 | 38 | 99  | 475  | 53.7  | 5.25 |
| Q9WUQ5   | C-X-C motif chemokine 14 OS=Mus musculus GN=Cxcl14 PE=2 SV=2 - [CXL14_MOUSE]                          | 7.07  | 1  | 1  | 1  | 2   | 0.635 | 0.836 | 0.984 | 1.021 | 4.56   | 7.07  | 2  | 2   | 99   | 11.7  | 9.88 |
| E9Q3P4   | Protein Cenpf OS=Mus musculus GN=Cenpf PE=2 SV=1 - [E9Q3P4_MOUSE]                                     | 2.40  | 3  | 3  | 9  | 16  | 1.396 | 1.390 | 1.373 | 1.021 | 39.90  | 2.40  | 10 | 16  | 2997 | 342.3 | 5.16 |
| P56873   | Sjogren syndrome/scleroderma autoantigen 1 homolog OS=Mus musculus GN=Ssca1 PE=2 SV=1 - [SSCA1_MOUSE] | 9.05  | 2  | 2  | 2  | 6   | 1.025 | 1.348 | 1.174 | 1.021 | 14.38  | 9.05  | 4  | 6   | 199  | 21.3  | 5.12 |
| Q8K268   | ATP-binding cassette sub-family F member 3 OS=Mus musculus GN=Abcf3 PE=1 SV=1 - [ABCF3_MOUSE]         | 28.63 | 1  | 15 | 16 | 33  | 0.917 | 0.713 | 0.871 | 1.021 | 86.91  | 28.63 | 23 | 33  | 709  | 79.8  | 6.16 |

|          |                                                                                                                                                      |       |   |    |    |     |       |       |       |       |        |       |     |     |      |       |      |
|----------|------------------------------------------------------------------------------------------------------------------------------------------------------|-------|---|----|----|-----|-------|-------|-------|-------|--------|-------|-----|-----|------|-------|------|
| Q60841-3 | Isoform 3 of Reelin<br>OS=Mus musculus<br>GN=Rein - [RELN_MOUSE]                                                                                     | 8.81  | 3 | 16 | 16 | 35  | 0.865 | 2.054 | 1.302 | 1.021 | 94.21  | 8.81  | 25  | 35  | 3428 | 383.0 | 5.55 |
| D3Z373   | Protein 2310045N01Rik<br>OS=Mus musculus<br>GN=2310045N01Rik PE=2<br>SV=1 - [D3Z373_MOUSE]                                                           | 14.16 | 2 | 2  | 2  | 3   | 1.426 | 1.417 | 0.977 | 1.021 | 7.97   | 14.16 | 3   | 3   | 113  | 12.7  | 6.93 |
| Q5RJG1   | Nucleolar protein 10<br>OS=Mus musculus<br>GN=Nol10 PE=2 SV=1 -<br>[NOL10_MOUSE]                                                                     | 1.31  | 1 | 1  | 1  | 2   | 0.414 | 0.839 | 0.890 | 1.021 | 3.67   | 1.31  | 1   | 2   | 687  | 80.0  | 8.19 |
| E9PZM7   | Protein Scaf11 OS=Mus<br>musculus GN=Scaf11<br>PE=2 SV=1 -<br>[E9PZM7_MOUSE]                                                                         | 2.06  | 3 | 2  | 3  | 5   | 1.627 | 0.622 | 1.117 | 1.021 | 14.57  | 2.06  | 5   | 5   | 1456 | 162.0 | 6.77 |
| E9PXY8   | Ubiquitin carboxyl-terminal<br>hydrolase 7 OS=Mus<br>musculus GN=Usp7 PE=2<br>SV=1 - [E9PXY8_MOUSE]                                                  | 41.73 | 7 | 41 | 41 | 116 | 1.021 | 1.158 | 1.037 | 1.021 | 326.46 | 41.73 | 66  | 116 | 1143 | 132.8 | 5.66 |
| Q3TIR1-3 | Isoform 3 of Trafficking<br>protein particle complex<br>subunit 13 OS=Mus<br>musculus GN=Trappc13 -<br>[TPC13_MOUSE]                                 | 8.25  | 4 | 3  | 3  | 12  | 0.728 | 0.866 | 0.864 | 1.021 | 32.47  | 8.25  | 5   | 12  | 412  | 45.9  | 5.60 |
| Q6P844-2 | Isoform 2 of Tyrosine-<br>protein phosphatase non-<br>receptor type 23 OS=Mus<br>musculus GN=Ptpn23 -<br>[PTN23_MOUSE]                               | 27.34 | 2 | 39 | 40 | 124 | 0.916 | 1.125 | 0.934 | 1.021 | 372.80 | 27.34 | 67  | 124 | 1690 | 184.8 | 6.76 |
| P97326   | Cadherin-6 OS=Mus<br>musculus GN=Cdh6 PE=1<br>SV=2 - [CADH6_MOUSE]                                                                                   | 13.54 | 1 | 9  | 11 | 21  | 0.918 | 0.630 | 1.117 | 1.021 | 56.20  | 13.54 | 17  | 21  | 790  | 88.3  | 5.00 |
| Q6PFX2-2 | Isoform 2 of BEN domain-<br>containing protein 6<br>OS=Mus musculus<br>GN=Bend6 -<br>[BEND6_MOUSE]                                                   | 11.16 | 3 | 2  | 2  | 11  | 1.120 | 0.520 | 0.859 | 1.021 | 33.95  | 11.16 | 4   | 11  | 251  | 28.2  | 8.22 |
| Q9Z2D1   | Myotubularin-related<br>protein 2 OS=Mus<br>musculus GN=Mtmr2<br>PE=1 SV=3 -<br>[MTR2_MOUSE]                                                         | 26.59 | 5 | 14 | 15 | 52  | 1.066 | 0.838 | 1.026 | 1.021 | 164.90 | 26.59 | 28  | 52  | 643  | 73.2  | 7.25 |
| Q6RHR9-3 | Isoform 3 of Membrane-<br>associated guanylate<br>kinase, WW and PDZ<br>domain-containing protein<br>1 OS=Mus musculus<br>GN=Magi1 -<br>[MAG1_MOUSE] | 28.05 | 4 | 25 | 27 | 132 | 1.609 | 1.135 | 1.084 | 1.021 | 416.23 | 28.05 | 51  | 132 | 1237 | 134.3 | 5.78 |
| P33242-2 | Isoform 2 of Steroidogenic<br>factor 1 OS=Mus musculus<br>GN=Nr5a1 -<br>[STF1_MOUSE]                                                                 | 6.70  | 2 | 1  | 1  | 3   | 2.663 | 1.502 | 1.153 | 1.021 | 0.00   | 6.70  | 1   | 3   | 388  | 43.4  | 8.09 |
| J3QP71   | Basigin (Fragment)<br>OS=Mus musculus<br>GN=Bsg PE=4 SV=1 -<br>[J3QP71_MOUSE]                                                                        | 44.67 | 1 | 1  | 7  | 40  | 0.441 | 1.471 | 1.602 | 1.021 | 108.08 | 44.67 | 10  | 40  | 197  | 21.7  | 6.20 |
| Q80X90   | Filamin-B OS=Mus<br>musculus GN=Flnb PE=1<br>SV=3 - [FLNB_MOUSE]                                                                                     | 35.13 | 1 | 60 | 66 | 198 | 1.272 | 1.733 | 1.109 | 1.022 | 589.65 | 35.13 | 112 | 198 | 2602 | 277.7 | 5.71 |
| H7BX88   | Carnitine O-<br>acetyltransferase OS=Mus<br>musculus GN=Crat PE=2<br>SV=1 - [H7BX88_MOUSE]                                                           | 31.07 | 5 | 19 | 19 | 64  | 0.835 | 0.949 | 0.904 | 1.022 | 163.31 | 31.07 | 33  | 64  | 605  | 68.6  | 8.07 |
| Q80XG9   | Leucine-rich repeat<br>transmembrane neuronal<br>protein 4 OS=Mus<br>musculus GN=Lrrtm4<br>PE=1 SV=2 -<br>[LRRTM4_MOUSE]                             | 17.12 | 3 | 8  | 10 | 26  | 0.860 | 1.600 | 1.358 | 1.022 | 74.72  | 17.12 | 17  | 26  | 590  | 67.1  | 9.00 |
| Q7TT50   | Serine/threonine-protein<br>kinase MRCK beta<br>OS=Mus musculus<br>GN=Cdc42bpb PE=1 SV=2<br>- [MRCKB_MOUSE]                                          | 35.90 | 3 | 45 | 55 | 223 | 0.856 | 1.135 | 1.152 | 1.022 | 663.46 | 35.90 | 98  | 223 | 1713 | 194.6 | 6.46 |
| Q62420   | Endophilin-A1 OS=Mus<br>musculus GN=Sh3gl2<br>PE=1 SV=2<br>[SH3G2_MOUSE]                                                                             | 59.38 | 5 | 11 | 17 | 286 | 1.208 | 1.292 | 1.412 | 1.022 | 902.51 | 59.38 | 31  | 286 | 352  | 39.9  | 5.39 |
| G3X9U9   | Fission 1 (Mitochondrial<br>outer membrane) homolog<br>(Yeast), isoform CRA_c<br>OS=Mus musculus<br>GN=Fis1 PE=4 SV=1 -<br>[G3X9U9_MOUSE]            | 46.90 | 3 | 6  | 6  | 35  | 1.343 | 0.939 | 1.081 | 1.022 | 83.05  | 46.90 | 9   | 35  | 145  | 16.3  | 9.25 |
| O88327   | Alpha-catulin OS=Mus<br>musculus GN=Ctnn1<br>PE=2 SV=1 -<br>[CTN1_MOUSE]                                                                             | 2.46  | 1 | 2  | 2  | 2   | 2.462 | 1.809 | 1.128 | 1.022 | 5.24   | 2.46  | 2   | 2   | 731  | 81.4  | 6.55 |
| Q3V110   | Lysozyme g-like protein 2<br>OS=Mus musculus<br>GN=Lyg2 PE=2 SV=1 -<br>[LYG2_MOUSE]                                                                  | 6.10  | 1 | 1  | 1  | 1   | 1.232 | 0.711 | 0.932 | 1.022 | 0.00   | 6.10  | 1   | 1   | 213  | 23.7  | 8.44 |
| Q9D289   | Trafficking protein particle<br>complex subunit 6B<br>OS=Mus musculus<br>GN=Trappc6b PE=2 SV=1 -<br>[TPC6B_MOUSE]                                    | 38.61 | 1 | 7  | 7  | 17  | 0.697 | 1.207 | 0.827 | 1.022 | 41.78  | 38.61 | 11  | 17  | 158  | 17.9  | 8.68 |
| Q8VCL2   | Protein SCO2 homolog,<br>mitochondrial OS=Mus<br>musculus GN=Sco2 PE=2<br>SV=1 - [SCO2_MOUSE]                                                        | 15.29 | 1 | 3  | 3  | 13  | 1.037 | 0.923 | 0.876 | 1.022 | 42.92  | 15.29 | 6   | 13  | 255  | 28.9  | 8.29 |
| Q505F5   | Leucine-rich repeat-<br>containing protein 47<br>OS=Mus musculus<br>GN=Lrrc47 PE=1 SV=1 -<br>[LRC47_MOUSE]                                           | 40.28 | 4 | 19 | 19 | 67  | 0.786 | 0.882 | 0.934 | 1.022 | 174.10 | 40.28 | 34  | 67  | 581  | 63.6  | 8.10 |



|          |                                                                                                         |       |    |    |    |     |       |       |       |       |        |       |    |     |      |       |       |
|----------|---------------------------------------------------------------------------------------------------------|-------|----|----|----|-----|-------|-------|-------|-------|--------|-------|----|-----|------|-------|-------|
| E9PUD6   | Protein Zscan18 OS=Mus musculus GN=Zscan18 PE=4 SV=1 - [E9PUD6_MOUSE]                                   | 4.33  | 1  | 3  | 3  | 6   | 1.778 | 1.384 | 1.151 | 1.022 | 14.71  | 4.33  | 6  | 6   | 809  | 91.7  | 4.35  |
| Q60738   | Zinc transporter 1 OS=Mus musculus GN=Slc30a1 PE=2 SV=1 - [ZNT1_MOUSE]                                  | 27.24 | 2  | 10 | 10 | 40  | 1.053 | 1.057 | 1.145 | 1.022 | 125.83 | 27.24 | 16 | 40  | 503  | 54.7  | 6.62  |
| P53810   | Phosphatidylinositol transfer protein alpha isoform OS=Mus musculus GN=Pltpna PE=1 SV=2 - [PIPNA_MOUSE] | 63.10 | 4  | 15 | 18 | 166 | 0.805 | 1.035 | 0.946 | 1.022 | 453.11 | 63.10 | 30 | 166 | 271  | 31.9  | 6.37  |
| Q3TMX0   | MCG4375, isoform CRA_b OS=Mus musculus GN=Sdcbp PE=2 SV=1 - [Q3TMX0_MOUSE]                              | 30.20 | 5  | 6  | 7  | 14  | 1.320 | 1.329 | 1.152 | 1.022 | 34.64  | 30.20 | 9  | 14  | 298  | 32.2  | 7.15  |
| Q9JIK9   | 28S ribosomal protein S34, mitochondrial OS=Mus musculus GN=Mrps34 PE=2 SV=1 - [RT34_MOUSE]             | 35.32 | 1  | 8  | 8  | 31  | 0.874 | 0.764 | 0.945 | 1.022 | 75.12  | 35.32 | 15 | 31  | 218  | 25.8  | 10.43 |
| Q8R570   | Synaptosomal-associated protein 47 OS=Mus musculus GN=Snap47 PE=1 SV=1 -                                | 58.60 | 8  | 17 | 18 | 91  | 0.766 | 0.907 | 0.869 | 1.022 | 297.75 | 58.60 | 32 | 91  | 413  | 46.5  | 5.76  |
| E9PYB0   | Protein Ahnak2 (Fragment) OS=Mus musculus GN=Ahnak2 PE=2 SV=1 -                                         | 41.12 | 1  | 4  | 14 | 53  | 3.386 | 0.722 | 1.275 | 1.022 | 153.80 | 41.12 | 23 | 53  | 1739 | 182.6 | 7.08  |
| Q99JF7   | Gamma-glutamyltransferase 7 OS=Mus musculus GN=Ggt7 PE=1 SV=2 -                                         | 28.85 | 3  | 13 | 13 | 49  | 0.974 | 0.974 | 1.052 | 1.022 | 136.14 | 28.85 | 22 | 49  | 662  | 70.2  | 5.06  |
| Q8CFA2   | Aminomethyltransferase, mitochondrial OS=Mus musculus GN=Amt PE=2 SV=1 - [GCST_MOUSE]                   | 38.46 | 1  | 11 | 11 | 26  | 0.813 | 0.646 | 0.785 | 1.022 | 58.18  | 38.46 | 16 | 26  | 403  | 44.0  | 8.70  |
| Q5H8C4-2 | Isoform 2 of Vacuolar protein sorting-associated protein 13A OS=Mus musculus GN=Vps13a - [VP13A_MOUSE]  | 12.48 | 2  | 30 | 32 | 74  | 0.678 | 1.131 | 1.097 | 1.022 | 192.22 | 12.48 | 50 | 74  | 3061 | 346.5 | 6.02  |
| Q62417   | Sorbin and SH3 domain-containing protein 1 OS=Mus musculus GN=Sorbs1 PE=1 SV=2 - [SRBS1_MOUSE]          | 32.64 | 1  | 9  | 35 | 141 | 0.600 | 1.274 | 1.603 | 1.022 | 410.35 | 32.64 | 64 | 141 | 1290 | 143.0 | 8.25  |
| Q6NZL0   | Protein SOGA3 OS=Mus musculus GN=Soga3 PE=2 SV=2 - [SOGA3_MOUSE]                                        | 35.98 | 1  | 29 | 33 | 160 | 0.839 | 0.772 | 1.148 | 1.022 | 441.83 | 35.98 | 59 | 160 | 945  | 103.4 | 6.14  |
| P10853   | Histone H2B type 1-F/J/L OS=Mus musculus GN=Hist1h2bf PE=1 SV=2 - [H2B1F_MOUSE]                         | 73.02 | 11 | 2  | 13 | 252 | 0.338 | 0.952 | 0.891 | 1.022 | 721.67 | 73.02 | 24 | 252 | 126  | 13.9  | 10.32 |
| Q6PHU5   | Sortilin OS=Mus musculus GN=Sort1 PE=1 SV=1 - [SORT_MOUSE]                                              | 18.06 | 3  | 16 | 16 | 48  | 0.829 | 1.044 | 1.208 | 1.023 | 126.23 | 18.06 | 29 | 48  | 825  | 91.1  | 5.88  |
| Q9CWN7   | CCR4-NOT transcription complex subunit 11 OS=Mus musculus GN=Cnot11 PE=2 SV=1 - [CNO11_MOUSE]           | 15.64 | 1  | 4  | 4  | 21  | 0.616 | 1.231 | 1.002 | 1.023 | 54.43  | 15.64 | 7  | 21  | 505  | 54.9  | 6.55  |
| Q6PGF3   | Mediator of RNA polymerase II transcription subunit 16 OS=Mus musculus GN=Med16 PE=2 SV=2 -             | 5.56  | 3  | 4  | 4  | 7   | 0.713 | 0.911 | 0.771 | 1.023 | 19.87  | 5.56  | 5  | 7   | 828  | 91.7  | 7.75  |
| E9QB0    | Ral guanine nucleotide dissociation stimulator-like 1 OS=Mus musculus GN=Rgl1 PE=2 SV=1 - [E9QB0_MOUSE] | 4.70  | 7  | 3  | 4  | 7   | 1.323 | 1.233 | 1.258 | 1.023 | 15.24  | 4.70  | 5  | 7   | 766  | 85.9  | 5.83  |
| Q04207-2 | Isoform p65 delta of Transcription factor p65 OS=Mus musculus GN=Rela - [TF65_MOUSE]                    | 9.83  | 2  | 4  | 4  | 6   | 1.128 | 1.043 | 1.029 | 1.023 | 8.95   | 9.83  | 5  | 6   | 539  | 59.0  | 6.10  |
| P48771   | Cytochrome c oxidase subunit 7A2, mitochondrial OS=Mus musculus GN=Cox7a2 PE=1 SV=2 - [CX7A2_MOUSE]     | 34.94 | 1  | 2  | 3  | 140 | 0.876 | 0.891 | 0.962 | 1.023 | 322.00 | 34.94 | 6  | 140 | 83   | 9.3   | 10.27 |
| Q9JKK1   | Syntaxin-6 OS=Mus musculus GN=Sb6 PE=1 SV=1 - [STX6_MOUSE]                                              | 58.82 | 2  | 12 | 12 | 41  | 0.976 | 1.144 | 1.043 | 1.023 | 135.00 | 58.82 | 20 | 41  | 255  | 29.0  | 4.92  |
| E0CY63   | Claudin domain-containing protein 1 (Fragment) OS=Mus musculus GN=Cldn25 PE=2 SV=1 - [E0CY63_MOUSE]     | 15.45 | 3  | 2  | 2  | 8   | 0.990 | 0.928 | 0.926 | 1.023 | 18.51  | 15.45 | 4  | 8   | 123  | 14.3  | 4.70  |
| Q9WVM3   | Anaphase-promoting complex subunit 7 OS=Mus musculus GN=Anapc7 PE=2 SV=3 - [APC7_MOUSE]                 | 12.92 | 2  | 7  | 7  | 15  | 0.576 | 0.744 | 0.900 | 1.023 | 42.63  | 12.92 | 11 | 15  | 565  | 63.0  | 5.72  |
| Q80TL1   | Adenylylate cyclase type 2 OS=Mus musculus GN=Adcy2 PE=2 SV=2 - [ADCY2_MOUSE]                           | 10.46 | 2  | 9  | 10 | 26  | 0.837 | 0.931 | 1.014 | 1.023 | 96.00  | 10.46 | 16 | 26  | 1090 | 123.2 | 8.31  |
| Q80TQ5-3 | Isoform 3 of Pleckstrin homology domain-containing family M member 2 OS=Mus musculus GN=Plekhm2 -       | 4.15  | 4  | 3  | 3  | 5   | 1.174 | 0.839 | 1.016 | 1.023 | 18.61  | 4.15  | 4  | 5   | 867  | 95.0  | 4.79  |

|        |                                                                                                                                    |       |     |    |     |      |        |       |       |       |          |       |     |      |      |       |       |
|--------|------------------------------------------------------------------------------------------------------------------------------------|-------|-----|----|-----|------|--------|-------|-------|-------|----------|-------|-----|------|------|-------|-------|
| Q80YCS | Coagulation factor XII<br>OS=Mus musculus<br>GN=F12 PE=2 SV=2 -<br>[FA12_MOUSE]                                                    | 6.87  | 1   | 3  | 3   | 8    | 4.626  | 1.669 | 0.524 | 1.023 | 11.97    | 6.87  | 5   | 8    | 597  | 65.7  | 6.84  |
| Q9D1K2 | V-type proton ATPase<br>subunit F OS=Mus<br>musculus GN=Atp6v1f<br>PE=1 SV=2 -                                                     | 77.31 | 2   | 9  | 9   | 192  | 1.734  | 1.227 | 1.324 | 1.023 | 647.36   | 77.31 | 17  | 192  | 119  | 13.4  | 5.82  |
| Q923Z0 | G-protein coupled receptor<br>family C group 5 member<br>B OS=Mus musculus<br>GN=Gprc5b PE=2 SV=1 -<br>[GPC5B_MOUSE]               | 14.39 | 1   | 4  | 4   | 41   | 1.092  | 0.812 | 1.121 | 1.023 | 186.29   | 14.39 | 7   | 41   | 410  | 45.9  | 8.38  |
| Q9JKW0 | ADP-ribosylation factor-like<br>protein 6-interacting<br>protein 1 OS=Mus<br>musculus GN=Arl6ip1<br>PE=2 SV=1 -<br>[ARL6IP1_MOUSE] | 11.82 | 1   | 3  | 3   | 14   | 0.445  | 0.824 | 0.748 | 1.023 | 33.22    | 11.82 | 4   | 14   | 203  | 23.4  | 9.32  |
| Q8BGQ7 | Alanine-RNA ligase,<br>cytoplasmic OS=Mus<br>musculus GN=Aars PE=1<br>SV=1 - [SIAC_MOUSE]                                          | 45.97 | 3   | 33 | 34  | 150  | 0.741  | 0.816 | 0.958 | 1.023 | 450.80   | 45.97 | 60  | 150  | 968  | 106.8 | 5.67  |
| A3KGQ6 | Actin-related protein 2/3<br>complex subunit 5-like<br>protein OS=Mus musculus<br>GN=Arpc5l PE=2 SV=1 -<br>[A3KGQ6_MOUSE]          | 61.44 | 2   | 10 | 10  | 43   | 0.685  | 2.074 | 1.198 | 1.023 | 127.76   | 61.44 | 15  | 43   | 153  | 17.1  | 6.80  |
| Q8VCF0 | Mitochondrial antiviral-<br>signaling protein OS=Mus<br>musculus GN=Mavs PE=1<br>SV=1 - [MAVS_MOUSE]                               | 36.78 | 1   | 10 | 10  | 60   | 1.139  | 1.015 | 0.685 | 1.023 | 167.37   | 36.78 | 17  | 60   | 503  | 53.4  | 6.37  |
| Q8CF17 | DNA-directed RNA<br>polymerase II subunit<br>RPB2 OS=Mus musculus<br>GN=Polr2b PE=2 SV=2 -<br>[RPB2_MOUSE]                         | 13.71 | 1   | 15 | 15  | 37   | 0.676  | 0.930 | 0.801 | 1.024 | 108.22   | 13.71 | 27  | 37   | 1174 | 133.8 | 6.87  |
| Q8BNJ6 | Neuropilin and tolloid-like<br>protein 2 OS=Mus<br>musculus GN=Neto2 PE=1<br>SV=1 - [NETO2_MOUSE]                                  | 14.48 | 2   | 7  | 7   | 18   | 0.675  | 1.025 | 1.168 | 1.024 | 45.84    | 14.48 | 13  | 18   | 525  | 59.3  | 6.77  |
| Q9QVP9 | Protein-tyrosine kinase 2-<br>beta OS=Mus musculus<br>GN=Pk2b PE=1 SV=2 -<br>[FAK2_MOUSE]                                          | 46.58 | 4   | 41 | 42  | 167  | 0.795  | 3.696 | 2.376 | 1.024 | 462.63   | 46.58 | 74  | 167  | 1009 | 115.7 | 6.35  |
| Q6A085 | Zinc finger protein 629<br>OS=Mus musculus<br>GN=Znf629 PE=2 SV=2 -<br>[ZNF629_MOUSE]                                              | 13.84 | 147 | 6  | 7   | 12   | 1.747  | 1.053 | 0.877 | 1.024 | 22.96    | 13.84 | 8   | 12   | 867  | 96.0  | 7.78  |
| G3UWX1 | Replication factor C<br>subunit 1 OS=Mus<br>musculus GN=Rfc1 PE=2<br>SV=1 - [G3UWX1_MOUSE]                                         | 2.39  | 6   | 2  | 2   | 2    | 15.144 | 3.880 | 2.531 | 1.024 | 5.67     | 2.39  | 2   | 2    | 1130 | 125.8 | 9.35  |
| O35218 | Cleavage and<br>polyadenylation specificity<br>factor subunit 2 OS=Mus<br>musculus GN=Cpsf2 PE=1<br>SV=1 - [CPSF2_MOUSE]           | 10.23 | 1   | 6  | 6   | 14   | 1.141  | 1.089 | 0.944 | 1.024 | 39.68    | 10.23 | 11  | 14   | 782  | 88.3  | 5.11  |
| Q8K2M0 | 39S ribosomal protein L38,<br>mitochondrial OS=Mus<br>musculus GN=Mpl38<br>PE=2 SV=2 -<br>[RM38_MOUSE]                             | 18.95 | 2   | 7  | 7   | 15   | 0.630  | 0.690 | 0.826 | 1.024 | 42.32    | 18.95 | 11  | 15   | 380  | 45.0  | 8.10  |
| O88413 | Tubby-related protein 3<br>OS=Mus musculus<br>GN=Tulp3 PE=1 SV=1 -<br>[TULP3_MOUSE]                                                | 5.65  | 1   | 2  | 2   | 4    | 1.286  | 0.850 | 1.107 | 1.024 | 13.01    | 5.65  | 4   | 4    | 460  | 51.2  | 6.24  |
| Q9CX80 | Cyoglobin OS=Mus<br>musculus GN=Cygb PE=2<br>SV=1 - [CYGB_MOUSE]                                                                   | 24.21 | 1   | 5  | 5   | 19   | 1.627  | 0.807 | 0.708 | 1.024 | 49.97    | 24.21 | 9   | 19   | 190  | 21.5  | 6.80  |
| Q69ZP3 | Probable hydrolase PNKD<br>OS=Mus musculus<br>GN=Pnk4 PE=2 SV=2 -<br>[PNKD_MOUSE]                                                  | 19.22 | 3   | 7  | 9   | 27   | 0.904  | 0.623 | 1.005 | 1.024 | 71.35    | 19.22 | 14  | 27   | 385  | 43.0  | 8.94  |
| E9Q5W5 | Zinc finger ZZ-type and EF-<br>hand domain-containing<br>protein 1 OS=Mus<br>musculus GN=Zzf1 PE=2<br>SV=1 - [E9Q5W5_MOUSE]        | 15.53 | 6   | 32 | 33  | 84   | 0.838  | 0.936 | 1.006 | 1.024 | 245.07   | 15.53 | 57  | 84   | 2924 | 328.1 | 6.10  |
| Q9CQV7 | Mitochondrial import inner<br>membrane translocase<br>subunit TIM14 OS=Mus<br>musculus GN=Dnajc19<br>PE=2 SV=3 -<br>[TIM14_MOUSE]  | 71.55 | 5   | 9  | 9   | 24   | 0.877  | 0.922 | 1.073 | 1.024 | 61.47    | 71.55 | 16  | 24   | 116  | 12.4  | 10.10 |
| Q9D8N2 | Protein FAM45A OS=Mus<br>musculus GN=Fam45a<br>PE=2 SV=2 -<br>[FA45A_MOUSE]                                                        | 30.25 | 4   | 8  | 8   | 26   | 0.832  | 0.939 | 1.016 | 1.024 | 84.42    | 30.25 | 13  | 26   | 357  | 40.4  | 6.47  |
| P26039 | Talin-1 OS=Mus musculus<br>GN=Tin1 PE=1 SV=2 -<br>[TLN1_MOUSE]                                                                     | 51.48 | 4   | 84 | 107 | 478  | 0.879  | 1.474 | 0.819 | 1.024 | 1473.57  | 51.48 | 190 | 478  | 2541 | 269.7 | 6.18  |
| O70503 | Estradiol 17-beta-<br>dehydrogenase 12<br>OS=Mus musculus<br>GN=Hsd17b12 PE=2 SV=1<br>- [DHB12_MOUSE]                              | 44.55 | 2   | 15 | 15  | 58   | 0.548  | 0.603 | 0.775 | 1.024 | 163.09   | 44.55 | 28  | 58   | 312  | 34.7  | 9.52  |
| Q80T41 | Gamma-aminobutyric acid<br>type B receptor subunit 2<br>OS=Mus musculus<br>GN=Gabbr2 PE=2 SV=2 -<br>[GABR2_MOUSE]                  | 23.40 | 1   | 20 | 20  | 120  | 0.487  | 1.074 | 0.955 | 1.024 | 348.42   | 23.40 | 36  | 120  | 940  | 105.6 | 8.72  |
| P60710 | Actin, cytoplasmic 1<br>OS=Mus musculus<br>GN=Actb PE=1 SV=1 -<br>[ACTB_MOUSE]                                                     | 81.07 | 10  | 5  | 29  | 3254 | 0.987  | 1.388 | 1.022 | 1.024 | 10463.95 | 81.07 | 51  | 3254 | 375  | 41.7  | 5.48  |

|          |                                                                                                                    |       |   |    |    |     |       |       |       |       |        |       |    |     |      |       |       |
|----------|--------------------------------------------------------------------------------------------------------------------|-------|---|----|----|-----|-------|-------|-------|-------|--------|-------|----|-----|------|-------|-------|
| Q9CRB6   | Tubulin polymerization-promoting protein family member 3 OS=Mus musculus GN=Tppp3 PE=1 SV=1 - [TPPP3_MOUSE]        | 57.39 | 2 | 13 | 14 | 88  | 2.288 | 0.492 | 1.001 | 1.024 | 269.85 | 57.39 | 25 | 88  | 176  | 19.0  | 9.11  |
| D3Z2Y6   | Protein S100a16 (Fragment) OS=Mus musculus GN=S100a16 PE=2 SV=1 -                                                  | 47.95 | 2 | 3  | 3  | 24  | 1.093 | 1.017 | 1.083 | 1.024 | 75.48  | 47.95 | 5  | 24  | 73   | 8.5   | 9.35  |
| A2A6A1   | G patch domain-containing protein 8 OS=Mus musculus GN=Gpatch8 PE=2 SV=1 -                                         | 1.53  | 1 | 2  | 2  | 2   | 1.455 | 1.111 | 1.219 | 1.024 | 2.22   | 1.53  | 2  | 2   | 1505 | 164.9 | 7.64  |
| Q8K3G5   | Inactive serine/threonine-protein kinase VRK3 OS=Mus musculus GN=Vrk3 PE=1 SV=2 - [VRK3_MOUSE]                     | 8.83  | 5 | 4  | 4  | 5   | 1.081 | 0.967 | 1.020 | 1.024 | 10.69  | 8.83  | 4  | 5   | 453  | 50.8  | 8.57  |
| Q8C0Z1   | Protein ITFG3 OS=Mus musculus GN=Itfg3 PE=1 SV=1 - [ITFG3_MOUSE]                                                   | 21.26 | 3 | 8  | 8  | 15  | 1.444 | 0.925 | 1.243 | 1.024 | 46.11  | 21.26 | 13 | 15  | 555  | 60.5  | 5.68  |
| P45376   | Aldose reductase OS=Mus musculus GN=Akr1b1 PE=1 SV=3 - [ALDR_MOUSE]                                                | 62.03 | 3 | 17 | 18 | 96  | 0.966 | 1.141 | 0.862 | 1.024 | 295.41 | 62.03 | 31 | 96  | 316  | 35.7  | 7.18  |
| Q9CWX9   | Biogenesis of lysosome-related organelles complex 1 subunit 2 OS=Mus musculus GN=Blc1s2 PE=1 SV=1 - [BLC1S2_MOUSE] | 26.57 | 1 | 4  | 4  | 14  | 1.777 | 1.101 | 1.053 | 1.025 | 36.80  | 26.57 | 7  | 14  | 143  | 16.3  | 4.88  |
| A5A9W3   | GLI-Kruppel family member (Fragment) OS=Mus musculus GN=Gli2 PE=2 SV=1 - [A5A9W3_MOUSE]                            | 6.53  | 4 | 1  | 1  | 1   | 0.733 | 0.771 | 0.873 | 1.025 | 2.89   | 6.53  | 1  | 1   | 245  | 25.9  | 8.87  |
| P60335   | Poly(C)-binding protein 1 OS=Mus musculus GN=Pcbp1 PE=1 SV=1 - [PCBP1_MOUSE]                                       | 67.70 | 1 | 11 | 17 | 196 | 0.935 | 0.896 | 0.975 | 1.025 | 535.69 | 67.70 | 33 | 196 | 356  | 37.5  | 7.09  |
| Q8BV79   | TPR and ankyrin repeat-containing protein 1 OS=Mus musculus GN=Trank1 PE=2 SV=3 - [TRNK1_MOUSE]                    | 2.37  | 1 | 2  | 4  | 5   | 0.537 | 1.034 | 0.864 | 1.025 | 10.90  | 2.37  | 4  | 5   | 2999 | 343.1 | 7.81  |
| Q8BP00-2 | Isoform 2 of IQ calmodulin binding motif-containing protein 1 OS=Mus musculus GN=Iqcb1 - [IQCB1_MOUSE]             | 19.10 | 2 | 10 | 10 | 30  | 0.846 | 0.956 | 0.903 | 1.025 | 88.83  | 19.10 | 16 | 30  | 597  | 69.0  | 9.51  |
| P47754   | F-actin-capping protein subunit alpha-2 OS=Mus musculus GN=Capza2 PE=1 SV=3 - [CAZA2_MOUSE]                        | 62.94 | 2 | 10 | 13 | 283 | 1.057 | 1.490 | 1.174 | 1.025 | 813.48 | 62.94 | 25 | 283 | 286  | 32.9  | 5.85  |
| O08576-2 | Isoform 2 of RUN domain-containing protein 3A OS=Mus musculus GN=Rundc3a - [RUN3A_MOUSE]                           | 31.00 | 4 | 10 | 10 | 45  | 0.883 | 0.980 | 0.947 | 1.025 | 147.67 | 31.00 | 17 | 45  | 400  | 45.5  | 5.48  |
| E9Q1M1   | Protein Pdzd2 OS=Mus musculus GN=Pdzd2 PE=2 SV=1 - [E9Q1M1_MOUSE]                                                  | 4.33  | 1 | 9  | 9  | 15  | 1.378 | 1.174 | 1.479 | 1.025 | 32.24  | 4.33  | 13 | 15  | 2796 | 296.5 | 7.65  |
| Q8VI78   | Phospholipase A1 member A OS=Mus musculus GN=Pla1a PE=2 SV=3 - [PLA1A_MOUSE]                                       | 10.96 | 1 | 2  | 2  | 2   | 1.246 | 0.978 | 0.756 | 1.025 | 2.96   | 10.96 | 2  | 2   | 456  | 50.0  | 7.40  |
| Q8BHJ7   | Gamma-aminobutyric acid receptor subunit alpha-5 OS=Mus musculus GN=Gabra5 PE=2 SV=1 - [GBRAS_MOUSE]               | 16.20 | 1 | 5  | 7  | 25  | 0.837 | 1.013 | 1.093 | 1.025 | 66.91  | 16.20 | 13 | 25  | 463  | 52.2  | 9.01  |
| Q8BUE4   | Apoptosis-inducing factor 2 OS=Mus musculus GN=Aifm2 PE=2 SV=1 - [AIFM2_MOUSE]                                     | 7.77  | 2 | 2  | 2  | 2   | 1.202 | 1.109 | 0.990 | 1.025 | 5.71   | 7.77  | 2  | 2   | 373  | 40.6  | 8.98  |
| E9Q7D5   | Protein Arhgef5 OS=Mus musculus GN=Arhgef5 PE=2 SV=1 - [E9Q7D5_MOUSE]                                              | 1.14  | 1 | 1  | 1  | 2   | 2.628 | 1.012 | 1.189 | 1.025 | 4.52   | 1.14  | 2  | 2   | 1581 | 176.6 | 5.83  |
| A2AR50   | Ankyrin repeat domain-containing protein 63 OS=Mus musculus GN=Ankrd63 PE=4 SV=1 - [ANR63_MOUSE]                   | 17.44 | 1 | 5  | 5  | 10  | 1.078 | 1.898 | 4.483 | 1.025 | 29.27  | 17.44 | 8  | 10  | 390  | 41.0  | 10.83 |
| Q91W29   | Cytochrome c oxidase subunit 4 isoform 2, mitochondrial OS=Mus musculus GN=Cox4i2 PE=2 SV=1 - [COX4I2_MOUSE]       | 23.26 | 1 | 3  | 3  | 9   | 1.402 | 1.754 | 1.195 | 1.025 | 25.67  | 23.26 | 4  | 9   | 172  | 20.2  | 9.47  |
| P58391   | Small conductance calcium-activated potassium channel protein 3 OS=Mus musculus GN=Kcnn3 PE=2 SV=1 - [KCNN3_MOUSE] | 6.02  | 2 | 3  | 5  | 7   | 0.519 | 0.967 | 0.806 | 1.025 | 20.54  | 6.02  | 7  | 7   | 731  | 81.2  | 8.95  |
| Q9WV18   | Gamma-aminobutyric acid type B receptor subunit 1 OS=Mus musculus GN=Gabbr1 PE=1 SV=1 - [GABR1_MOUSE]              | 19.48 | 5 | 19 | 19 | 96  | 0.601 | 1.066 | 0.999 | 1.025 | 277.10 | 19.48 | 36 | 96  | 960  | 108.1 | 8.21  |
| Q8R307   | Vacuolar protein sorting-associated protein 18 homolog OS=Mus musculus GN=Vps18 PE=1 SV=2 - [VPS18_MOUSE]          | 24.56 | 1 | 20 | 20 | 65  | 0.835 | 0.951 | 0.887 | 1.026 | 188.16 | 24.56 | 32 | 65  | 973  | 110.1 | 6.09  |

|          |                                                                                                                              |       |    |    |    |     |       |       |       |       |        |       |    |     |      |       |      |
|----------|------------------------------------------------------------------------------------------------------------------------------|-------|----|----|----|-----|-------|-------|-------|-------|--------|-------|----|-----|------|-------|------|
| Q8BTN3   | DNA segment, Chr 16, human D22S680E, expressed, isoform CRA_c OS=Mus musculus GN=Tango2 PE=2 SV=1 - [Q8BTN3_MOUSE]           | 39.13 | 4  | 9  | 9  | 20  | 1.492 | 1.013 | 1.031 | 1.026 | 59.00  | 39.13 | 14 | 20  | 276  | 30.9  | 5.10 |
| Q78T54-2 | Isoform 2 of Vacuolar ATPase assembly integral membrane protein VMA21 OS=Mus musculus GN=Vma21 - [Q78T54_MOUSE]              | 14.46 | 2  | 1  | 1  | 12  | 0.500 | 1.053 | 0.881 | 1.026 | 43.80  | 14.46 | 2  | 12  | 83   | 9.3   | 9.99 |
| A2AQY8   | Kynurenine-oxoglutarate transaminase 1 OS=Mus musculus GN=Ccb1 PE=2 SV=1 - [A2AQY8_MOUSE]                                    | 30.21 | 3  | 7  | 8  | 35  | 1.808 | 0.905 | 0.993 | 1.026 | 107.80 | 30.21 | 14 | 35  | 374  | 42.2  | 7.53 |
| Q9CWB7   | Glutaredoxin-like protein C5orf63 homolog OS=Mus musculus PE=1 SV=1 - [YD286_MOUSE]                                          | 16.52 | 1  | 2  | 2  | 3   | 1.616 | 1.122 | 1.256 | 1.026 | 2.50   | 16.52 | 2  | 3   | 115  | 13.4  | 9.13 |
| B9EJ54   | MCG21756, isoform CRA_b OS=Mus musculus GN=Nup205 PE=2 SV=1 - [B9EJ54_MOUSE]                                                 | 17.83 | 2  | 24 | 26 | 51  | 0.828 | 1.128 | 0.931 | 1.026 | 144.13 | 17.83 | 40 | 51  | 2008 | 227.3 | 6.34 |
| Q3UF95   | Large proline-rich protein BAG6 OS=Mus musculus GN=Bag6 PE=2 SV=1 - [Q3UF95_MOUSE]                                           | 32.31 | 8  | 27 | 27 | 124 | 0.971 | 1.023 | 1.059 | 1.026 | 407.04 | 32.31 | 47 | 124 | 1136 | 119.1 | 5.82 |
| Q99LE6   | ATP-binding cassette sub-family F member 2 OS=Mus musculus GN=Abcf2 PE=2 SV=1 - [ABCF2_MOUSE]                                | 12.74 | 1  | 8  | 8  | 32  | 0.680 | 0.512 | 0.881 | 1.026 | 82.36  | 12.74 | 13 | 32  | 628  | 71.7  | 7.05 |
| Q61418   | H(+)/Cl(-) exchange transporter 4 OS=Mus musculus GN=Cicr4 PE=2 SV=2 - [CLCN4_MOUSE]                                         | 12.45 | 1  | 5  | 6  | 16  | 1.133 | 0.891 | 0.967 | 1.026 | 38.19  | 12.45 | 10 | 16  | 747  | 83.7  | 6.86 |
| Q61735-2 | Isoform 2 of Leukocyte surface antigen CD47 OS=Mus musculus GN=Cd47 - [Q61735_MOUSE]                                         | 22.53 | 3  | 7  | 7  | 77  | 0.752 | 1.153 | 1.109 | 1.026 | 251.40 | 22.53 | 12 | 77  | 324  | 35.3  | 8.25 |
| Q8VEE1   | LIM and cysteine-rich domains protein 1 OS=Mus musculus GN=Lmcd1 PE=1 SV=1 - [LMCD1_MOUSE]                                   | 30.68 | 1  | 9  | 9  | 20  | 1.778 | 1.425 | 1.539 | 1.026 | 59.33  | 30.68 | 14 | 20  | 365  | 41.0  | 7.93 |
| D3YXQ9   | Tubulin polyglutamylase TTL13 OS=Mus musculus GN=Tll13 PE=2 SV=1 - [D3YXQ9_MOUSE]                                            | 1.81  | 2  | 1  | 1  | 1   | 2.170 | 1.154 | 0.763 | 1.026 | 0.00   | 1.81  | 1  | 1   | 663  | 77.9  | 8.10 |
| Q9D020   | Cytosolic 5'-nucleotidase 3A OS=Mus musculus GN=Nt5c3a PE=1 SV=4 - [5NT3A_MOUSE]                                             | 53.17 | 2  | 17 | 17 | 59  | 1.007 | 1.313 | 0.935 | 1.026 | 151.32 | 53.17 | 29 | 59  | 331  | 37.2  | 6.65 |
| Q99MU3-5 | Isoform 5 of Double-stranded RNA-specific adenosine deaminase OS=Mus musculus GN=Adar - [Q99MU3_MOUSE]                       | 29.78 | 5  | 20 | 20 | 57  | 0.771 | 0.652 | 0.872 | 1.026 | 197.02 | 29.78 | 34 | 57  | 930  | 102.5 | 8.78 |
| Q3USD0   | Spermatogenesis-associated protein 7 homolog OS=Mus musculus GN=Spata7 PE=2 SV=1 - [Q3USD0_MOUSE]                            | 3.86  | 4  | 1  | 2  | 18  | 1.061 | 1.438 | 1.055 | 1.026 | 34.84  | 3.86  | 2  | 18  | 415  | 47.0  | 6.33 |
| Q9QYP6   | 5-azacytidine-induced protein 2 OS=Mus musculus GN=Azi2 PE=1 SV=1 - [AZI2_MOUSE]                                             | 23.21 | 5  | 9  | 9  | 22  | 1.550 | 0.972 | 1.344 | 1.026 | 70.67  | 23.21 | 15 | 22  | 405  | 46.1  | 6.70 |
| G3UZJ3   | Dystrobrevin beta OS=Mus musculus GN=Dtnb PE=2 SV=1 - [G3UZJ3_MOUSE]                                                         | 15.56 | 16 | 4  | 8  | 36  | 0.851 | 1.599 | 1.254 | 1.026 | 87.51  | 15.56 | 13 | 36  | 559  | 63.4  | 8.38 |
| Q8R5A0   | N-lysine methyltransferase SMYD2 OS=Mus musculus GN=Smyd2 PE=1 SV=1 - [SMYD2_MOUSE]                                          | 12.01 | 1  | 4  | 4  | 8   | 0.927 | 0.987 | 0.877 | 1.026 | 15.81  | 12.01 | 7  | 8   | 433  | 49.5  | 6.95 |
| Q8CFE6   | Sodium-coupled neutral amino acid transporter 2 OS=Mus musculus GN=Slc38a2 PE=1 SV=1 - [S38A2_MOUSE]                         | 4.17  | 1  | 1  | 1  | 3   | 2.255 | 1.070 | 0.998 | 1.026 | 13.80  | 4.17  | 1  | 3   | 504  | 55.5  | 7.94 |
| B7ZNX6   | ErbB2ip protein OS=Mus musculus GN=ErbB2ip PE=2 SV=1 - [B7ZNX6_MOUSE]                                                        | 27.57 | 4  | 28 | 33 | 78  | 1.696 | 0.938 | 1.293 | 1.026 | 219.28 | 27.57 | 51 | 78  | 1411 | 157.8 | 5.87 |
| Q3V1V0   | NEDD4 family-interacting protein 2 OS=Mus musculus GN=Ndfip2 PE=2 SV=1 - [Q3V1V0_MOUSE]                                      | 5.81  | 5  | 1  | 1  | 4   | 1.239 | 0.840 | 1.117 | 1.026 | 13.87  | 5.81  | 2  | 4   | 241  | 26.8  | 4.70 |
| Q14AK4   | Probable palmitoyltransferase ZDHHC11 OS=Mus musculus GN=Zdhhc11 PE=2 SV=2 - [Q14AK4_MOUSE]                                  | 2.31  | 1  | 1  | 1  | 1   | 1.708 | 1.064 | 2.006 | 1.027 | 2.05   | 2.31  | 1  | 1   | 347  | 39.6  | 8.97 |
| A2A189   | Phosphorylase b kinase regulatory subunit alpha, skeletal muscle isoform OS=Mus musculus GN=Phka1 PE=2 SV=1 - [A2A189_MOUSE] | 13.71 | 6  | 11 | 14 | 43  | 0.888 | 0.868 | 0.803 | 1.027 | 121.28 | 13.71 | 21 | 43  | 1211 | 135.5 | 5.86 |
| Q4PJX1   | Protein odr-4 homolog OS=Mus musculus GN=Odr4 PE=2 SV=2 - [ODR4_MOUSE]                                                       | 16.33 | 3  | 8  | 8  | 31  | 0.780 | 0.764 | 0.825 | 1.027 | 79.35  | 16.33 | 15 | 31  | 447  | 50.0  | 6.14 |
| A2ARZ0   | Protein Olfr1049 OS=Mus musculus GN=Olfr1049 PE=4 SV=1 - [A2ARZ0_MOUSE]                                                      | 10.06 | 20 | 1  | 2  | 2   | 1.292 | 1.010 | 0.828 | 1.027 | 0.00   | 10.06 | 2  | 2   | 308  | 34.9  | 8.48 |

|          |                                                                                                                            |       |    |    |    |      |       |       |       |       |         |       |    |      |      |       |      |
|----------|----------------------------------------------------------------------------------------------------------------------------|-------|----|----|----|------|-------|-------|-------|-------|---------|-------|----|------|------|-------|------|
| Q923T9   | Calcium/calmodulin-dependent protein kinase type II subunit gamma OS=Mus musculus GN=Camk2g PE=1 SV=1 - [KCC2G_MOUSE]      | 51.80 | 2  | 1  | 25 | 344  | 0.920 | 1.209 | 1.170 | 1.027 | 891.05  | 51.80 | 45 | 344  | 529  | 59.6  | 7.58 |
| Q06180-2 | Isoform PTPA of Tyrosine-protein phosphatase non-receptor type 2 OS=Mus musculus GN=Ptpn2 - [PTN2_MOUSE]                   | 16.75 | 3  | 4  | 4  | 9    | 0.943 | 1.023 | 1.021 | 1.027 | 31.57   | 16.75 | 7  | 9    | 382  | 44.5  | 8.24 |
| Q7T5Z8   | Nucleus accumbens-associated protein 1 OS=Mus musculus GN=Nacc1 PE=1 SV=1 - [NACC1_MOUSE]                                  | 15.37 | 1  | 5  | 6  | 14   | 1.188 | 1.058 | 1.135 | 1.027 | 39.98   | 15.37 | 10 | 14   | 514  | 56.5  | 5.73 |
| A2AKH7   | Leucine-rich repeat-containing protein 57 (Fragment) OS=Mus musculus GN=Lrrc57 PE=2 SV=1 - [A2AKH7_MOUSE]                  | 43.38 | 4  | 10 | 10 | 23   | 0.605 | 1.596 | 1.307 | 1.027 | 63.36   | 43.38 | 17 | 23   | 219  | 24.3  | 8.18 |
| Q9D4V7   | Rab-like protein 3 OS=Mus musculus GN=Rab3 PE=2 SV=1 - [RABL3_MOUSE]                                                       | 11.44 | 1  | 2  | 2  | 5    | 1.161 | 1.227 | 0.931 | 1.027 | 17.94   | 11.44 | 2  | 5    | 236  | 26.3  | 7.15 |
| H7BX92   | Brain-specific angiogenesis inhibitor 2 OS=Mus musculus GN=Bei2 PE=2 SV=1 - [H7BX92_MOUSE]                                 | 10.54 | 7  | 10 | 11 | 39   | 0.932 | 1.391 | 1.370 | 1.027 | 116.22  | 10.54 | 19 | 39   | 1489 | 162.5 | 7.50 |
| Q9CRC9   | Glucosamine-6-phosphate isomerase 2 OS=Mus musculus GN=Gnpda2 PE=2 SV=1 - [GNP2_MOUSE]                                     | 53.26 | 5  | 8  | 11 | 46   | 1.554 | 1.020 | 0.806 | 1.027 | 146.26  | 53.26 | 18 | 46   | 276  | 31.1  | 6.90 |
| Q769J6   | A disintegrin and metalloproteinase with thrombospondin motifs 13 OS=Mus musculus GN=Adamts13 PE=2 SV=1 - [ADAMTS13_MOUSE] | 1.12  | 1  | 1  | 1  | 1    | 0.709 | 1.073 | 1.399 | 1.027 | 0.00    | 1.12  | 1  | 1    | 1426 | 155.3 | 6.57 |
| Q61286-2 | Isoform ALPHA of Transcription factor 12 OS=Mus musculus GN=Tcf12 - [TCF12_MOUSE]                                          | 5.72  | 2  | 1  | 2  | 3    | 1.297 | 0.822 | 1.489 | 1.027 | 7.97    | 5.72  | 3  | 3    | 682  | 72.9  | 7.02 |
| Q3UN04   | Ubiquitin carboxyl-terminal hydrolase 30 OS=Mus musculus GN=Usp30 PE=2 SV=1 - [UBP30_MOUSE]                                | 12.96 | 1  | 3  | 3  | 8    | 0.603 | 0.741 | 0.788 | 1.027 | 14.36   | 12.96 | 4  | 8    | 517  | 58.2  | 8.46 |
| Q9D7E3   | Ovarian cancer-associated gene 2 protein homolog OS=Mus musculus GN=Ovcg2 PE=2 SV=1 - [OVCA2_MOUSE]                        | 5.78  | 1  | 1  | 1  | 8    | 0.696 | 1.128 | 0.919 | 1.027 | 14.64   | 5.78  | 2  | 8    | 225  | 24.2  | 5.88 |
| E9QAF9   | Protein TANC1 OS=Mus musculus GN=Tanc1 PE=2 SV=1 - [E9QAF9_MOUSE]                                                          | 15.52 | 3  | 19 | 20 | 66   | 1.145 | 0.860 | 1.130 | 1.027 | 189.90  | 15.52 | 32 | 66   | 1849 | 199.9 | 8.32 |
| Q9CQD1   | Ras-related protein Rab-5A OS=Mus musculus GN=Rab5a PE=1 SV=1 - [RAB5A_MOUSE]                                              | 46.05 | 1  | 5  | 8  | 58   | 0.857 | 0.984 | 0.928 | 1.027 | 184.34  | 46.05 | 15 | 58   | 215  | 23.6  | 8.15 |
| P60954-2 | Isoform 2 of Nucleolar protein 4 OS=Mus musculus GN=Nol4 - [NOL4_MOUSE]                                                    | 13.30 | 7  | 3  | 5  | 19   | 1.091 | 1.759 | 1.276 | 1.027 | 32.24   | 13.30 | 7  | 19   | 564  | 62.5  | 5.17 |
| Q8C6I2   | Succinate dehydrogenase assembly factor 2, mitochondrial OS=Mus musculus GN=Sdhaf2 PE=2 SV=1 - [SDHAF2_MOUSE]              | 23.78 | 3  | 3  | 4  | 19   | 1.888 | 0.934 | 1.479 | 1.028 | 53.88   | 23.78 | 8  | 19   | 164  | 19.4  | 6.35 |
| P07901   | Heat shock protein HSP 90-alpha OS=Mus musculus GN=Hsp90aa1 PE=1 SV=4 - [HS90A_MOUSE]                                      | 59.89 | 7  | 37 | 53 | 1143 | 0.779 | 0.910 | 0.912 | 1.028 | 3532.93 | 59.89 | 98 | 1143 | 733  | 84.7  | 5.01 |
| Q5BL07-2 | Isoform 2 of Peroxisome biogenesis factor 1 OS=Mus musculus GN=Pex1 - [PEX1_MOUSE]                                         | 8.76  | 4  | 10 | 11 | 23   | 0.849 | 0.695 | 0.915 | 1.028 | 56.21   | 8.76  | 18 | 23   | 1244 | 136.7 | 6.21 |
| G5E8T2   | E3 ubiquitin-protein ligase TTC3 OS=Mus musculus GN=Ttc3 PE=4 SV=1 - [G5E8T2_MOUSE]                                        | 14.25 | 22 | 22 | 26 | 73   | 0.735 | 0.681 | 0.855 | 1.028 | 227.32  | 14.25 | 40 | 73   | 1979 | 223.8 | 6.25 |
| P63166   | Small ubiquitin-related modifier 1 OS=Mus musculus GN=Sumo1 PE=1 SV=1 - [SUMO1_MOUSE]                                      | 35.64 | 1  | 4  | 4  | 20   | 1.594 | 1.002 | 1.210 | 1.028 | 34.57   | 35.64 | 7  | 20   | 101  | 11.5  | 5.52 |
| P62746   | Rho-related GTP-binding protein RhoB OS=Mus musculus GN=Rhob PE=1 SV=1 - [RHOB_MOUSE]                                      | 64.29 | 1  | 7  | 9  | 115  | 0.891 | 0.880 | 0.971 | 1.028 | 366.85  | 64.29 | 16 | 115  | 196  | 22.1  | 5.24 |
| Q3TYH2   | Ras-related protein Rab-15 OS=Mus musculus GN=Rab15 PE=2 SV=1 - [Q3TYH2_MOUSE]                                             | 34.43 | 7  | 5  | 8  | 90   | 0.455 | 1.503 | 1.159 | 1.028 | 261.53  | 34.43 | 14 | 90   | 212  | 24.3  | 5.71 |
| E9QK34   | Neuroigin-1 OS=Mus musculus GN=Nlgn1 PE=2 SV=1 - [E9QK34_MOUSE]                                                            | 13.88 | 3  | 6  | 9  | 37   | 1.063 | 1.419 | 1.089 | 1.028 | 102.86  | 13.88 | 15 | 37   | 814  | 91.0  | 6.10 |
| Q8BH17   | A230074B11Rik protein OS=Mus musculus GN=Vwa3b PE=2 SV=1 - [Q8BH17_MOUSE]                                                  | 9.04  | 1  | 1  | 2  | 2    | 1.116 | 0.707 | 0.960 | 1.028 | 2.84    | 9.04  | 2  | 2    | 343  | 39.1  | 5.92 |
| P59281-2 | Isoform 2 of Rho GTPase-activating protein 39 OS=Mus musculus GN=Arhgap39 - [ARHAP39_MOUSE]                                | 21.93 | 5  | 22 | 22 | 54   | 0.723 | 1.028 | 1.145 | 1.028 | 150.66  | 21.93 | 39 | 54   | 1076 | 121.4 | 7.52 |
| O08585   | Clathrin light chain A OS=Mus musculus GN=Cla PE=1 SV=2 - [CLCA_MOUSE]                                                     | 25.96 | 6  | 7  | 8  | 188  | 1.975 | 1.346 | 1.842 | 1.028 | 451.46  | 25.96 | 16 | 188  | 235  | 25.6  | 4.58 |

|          |                                                                                                                       |       |   |    |    |     |       |       |       |       |        |       |    |     |      |       |      |
|----------|-----------------------------------------------------------------------------------------------------------------------|-------|---|----|----|-----|-------|-------|-------|-------|--------|-------|----|-----|------|-------|------|
| Q91X11   | tRNA-dihydrouridine(47) synthase [NAD(P)(+)]-like<br>OS=Mus musculus<br>GN=Dus3l PE=2 SV=1 - [DUS3L_MOUSE]            | 14.76 | 2 | 9  | 9  | 23  | 0.812 | 0.822 | 0.827 | 1.028 | 61.03  | 14.76 | 16 | 23  | 637  | 71.0  | 7.97 |
| Q8C052   | Microtubule-associated protein 15 OS=Mus musculus GN=Map1s PE=1 SV=2 -                                                | 24.36 | 1 | 19 | 19 | 86  | 0.691 | 0.945 | 0.954 | 1.028 | 256.35 | 24.36 | 36 | 86  | 973  | 102.9 | 7.02 |
| Q8BUN9   | Protein Slc24a2 OS=Mus musculus GN=Slc24a2 PE=2 SV=1 - [Q8BUN9_MOUSE]                                                 | 18.62 | 3 | 2  | 8  | 68  | 0.533 | 0.952 | 1.498 | 1.028 | 170.37 | 18.62 | 14 | 68  | 666  | 74.2  | 6.54 |
| Q9DBL9-2 | Isoform 2 of 1-acylglycerol-3-phosphate O-acyltransferase ABHD5 OS=Mus musculus GN=Abhd5 - [ABHD5_MOUSE]              | 17.17 | 2 | 2  | 2  | 7   | 0.907 | 0.802 | 1.024 | 1.028 | 22.76  | 17.17 | 4  | 7   | 198  | 21.8  | 6.39 |
| Q3UYG8   | O-acetyl-ADP-ribose deacetylase MACROD2 OS=Mus musculus GN=MacroD2 PE=2 SV=1 - [MACD2_MOUSE]                          | 20.63 | 2 | 6  | 6  | 13  | 1.168 | 1.173 | 1.155 | 1.028 | 40.14  | 20.63 | 11 | 13  | 475  | 52.1  | 4.75 |
| Q9WMT5   | RuvB-like 2 OS=Mus musculus GN=Ruvbl2 PE=2 SV=3 - [RUVB2_MOUSE]                                                       | 52.92 | 2 | 22 | 22 | 82  | 0.876 | 1.119 | 0.846 | 1.028 | 235.30 | 52.92 | 40 | 82  | 463  | 51.1  | 5.64 |
| E9Q6H7   | Uncharacterized protein OS=Mus musculus GN=Tmem181b-ps PE=4 SV=1 - [E9Q6H7_MOUSE]                                     | 8.42  | 2 | 1  | 1  | 2   | 0.992 | 1.246 | 0.895 | 1.028 | 7.29   | 8.42  | 2  | 2   | 190  | 21.8  | 8.69 |
| Q3UHD6-2 | Isoform 2 of Sorting nexin-27 OS=Mus musculus GN=Snx27 - [SNX27_MOUSE]                                                | 42.59 | 5 | 17 | 17 | 77  | 0.869 | 1.051 | 0.929 | 1.028 | 278.82 | 42.59 | 32 | 77  | 526  | 59.5  | 6.24 |
| Q8K448   | ATP-binding cassette sub-family A member 5 OS=Mus musculus GN=Abca5 PE=1 SV=2 - [ABCA5_MOUSE]                         | 5.97  | 3 | 10 | 11 | 28  | 0.869 | 1.032 | 0.924 | 1.029 | 87.13  | 5.97  | 15 | 28  | 1642 | 185.8 | 7.20 |
| P68404-2 | Isoform Beta-II of Protein kinase C beta type OS=Mus musculus GN=Prkcb -                                              | 43.98 | 1 | 2  | 28 | 225 | 0.567 | 0.842 | 1.771 | 1.029 | 601.76 | 43.98 | 50 | 225 | 673  | 76.8  | 7.02 |
| F8VQE9   | Arf-GAP with GTPase, ANK repeat and PH domain-containing protein 3 OS=Mus musculus GN=Agap3 PE=2 SV=1 - [AGAP3_MOUSE] | 23.74 | 4 | 12 | 17 | 85  | 0.691 | 1.119 | 1.044 | 1.029 | 267.02 | 23.74 | 31 | 85  | 910  | 97.6  | 7.77 |
| Q9JM14   | 5'(3')-deoxyribonucleotidase, cytosolic type OS=Mus musculus GN=Nt5c PE=1 SV=1 - [NT5C_MOUSE]                         | 62.50 | 1 | 2  | 9  | 46  | 1.157 | 1.681 | 0.848 | 1.029 | 150.90 | 62.50 | 17 | 46  | 200  | 23.1  | 5.49 |
| E9Q7C0   | Protein 1700030K09Rik OS=Mus musculus GN=1700030K09Rik PE=2 SV=1 - [E9Q7C0_MOUSE]                                     | 8.07  | 2 | 3  | 3  | 4   | 1.045 | 0.907 | 1.134 | 1.029 | 6.40   | 8.07  | 4  | 4   | 607  | 65.4  | 5.94 |
| Q6NXL5   | ArfGAP with coiled-coil, ankyrin repeat and PH domains 3 OS=Mus musculus GN=Acap3 PE=2 SV=1 - [Q6NXL5_MOUSE]          | 16.33 | 4 | 8  | 10 | 20  | 1.264 | 1.159 | 1.284 | 1.029 | 50.79  | 16.33 | 16 | 20  | 833  | 92.7  | 6.02 |
| Q9D880   | Mitochondrial import inner membrane translocase subunit TIM50 OS=Mus musculus GN=Timm50 PE=1 SV=1 - [TIM50_MOUSE]     | 36.26 | 1 | 12 | 12 | 65  | 0.695 | 0.918 | 0.896 | 1.029 | 163.36 | 36.26 | 22 | 65  | 353  | 39.8  | 8.13 |
| Q8R361   | Rab11 family-interacting protein 5 OS=Mus musculus GN=Rab11fp5 PE=1 SV=2 -                                            | 33.80 | 1 | 14 | 14 | 91  | 1.130 | 0.741 | 1.018 | 1.029 | 369.23 | 33.80 | 26 | 91  | 645  | 69.5  | 9.07 |
| D3Z444   | RIKEN cDNA 1810048P08, isoform CRA_b OS=Mus musculus GN=Rab43 PE=3 SV=1 - [D3Z444_MOUSE]                              | 16.67 | 3 | 1  | 2  | 45  | 2.166 | 1.751 | 1.203 | 1.029 | 125.99 | 16.67 | 3  | 45  | 150  | 16.6  | 8.78 |
| E9Q512   | Protein Trip11 OS=Mus musculus GN=Trip11 PE=2 SV=1 - [E9Q512_MOUSE]                                                   | 22.82 | 4 | 8  | 40 | 84  | 1.958 | 1.142 | 0.984 | 1.029 | 214.55 | 22.82 | 58 | 84  | 1976 | 226.3 | 5.26 |
| A2A543   | Voltage-dependent L-type calcium channel subunit beta-1 OS=Mus musculus GN=Cacnb1 PE=2 SV=1 - [A2A543_MOUSE]          | 35.68 | 6 | 3  | 17 | 82  | 1.194 | 1.205 | 1.185 | 1.029 | 275.46 | 35.68 | 32 | 82  | 597  | 65.4  | 6.62 |
| P97393   | Rho GTPase-activating protein 5 OS=Mus musculus GN=Arhgap5 PE=2 SV=2 -                                                | 22.19 | 2 | 26 | 27 | 67  | 0.835 | 0.922 | 0.964 | 1.029 | 198.81 | 22.19 | 42 | 67  | 1501 | 172.0 | 6.34 |
| Q3TZM9-2 | Isoform 2 of GDP-Mann:Man(3)GlcNAc(2)-PP-Dol alpha-1,2-mannosyltransferase OS=Mus musculus GN=Alg11 - [ALG11_MOUSE]   | 7.56  | 4 | 2  | 2  | 8   | 0.520 | 0.597 | 0.732 | 1.029 | 36.18  | 7.56  | 4  | 8   | 450  | 50.4  | 8.19 |
| Q3TEA8-2 | Isoform 2 of Heterochromatin protein 1-binding protein 3 OS=Mus musculus GN=Hp1bp3 - [HP1B3_MOUSE]                    | 34.75 | 8 | 19 | 19 | 79  | 0.467 | 0.902 | 0.928 | 1.029 | 213.92 | 34.75 | 35 | 79  | 541  | 59.5  | 9.79 |
| Q8BL03   | Mitochondrial carnitine/acylcarnitine carrier protein CACL OS=Mus musculus GN=Slc25a29 PE=2 SV=1 - [SLC25A29_MOUSE]   | 19.28 | 1 | 4  | 4  | 6   | 0.893 | 1.062 | 0.964 | 1.029 | 14.98  | 19.28 | 6  | 6   | 306  | 32.7  | 8.62 |

|          |                                                                                                                                                         |       |    |    |    |     |       |       |       |       |        |       |    |     |       |        |      |
|----------|---------------------------------------------------------------------------------------------------------------------------------------------------------|-------|----|----|----|-----|-------|-------|-------|-------|--------|-------|----|-----|-------|--------|------|
| Q9D3W4   | GPN-loop GTPase 3<br>OS=Mus musculus<br>GN=Gpn3 PE=2 SV=1 -<br>[GPN3_MOUSE]                                                                             | 14.44 | 2  | 2  | 2  | 4   | 0.878 | 1.324 | 0.735 | 1.029 | 18.05  | 14.44 | 4  | 4   | 284   | 32.8   | 4.53 |
| A8Y5G7   | DNA polymerase delta<br>subunit 2 (Fragment)<br>OS=Mus musculus<br>GN=Pold2 PE=2 SV=1 -<br>[A8Y5G7_MOUSE]                                               | 17.01 | 2  | 3  | 3  | 5   | 1.037 | 1.024 | 0.906 | 1.029 | 12.63  | 17.01 | 5  | 5   | 241   | 26.3   | 6.64 |
| Q8VCF1   | Soluble calcium-activated<br>nucleotidase 1 OS=Mus<br>musculus GN=Cant1 PE=2<br>SV=1 - [CANT1_MOUSE]                                                    | 18.86 | 3  | 5  | 5  | 9   | 0.725 | 1.011 | 0.955 | 1.029 | 17.22  | 18.86 | 8  | 9   | 403   | 45.6   | 6.77 |
| Q504P2   | C-type lectin domain<br>family 12 member A<br>OS=Mus musculus<br>GN=Clec12a PE=2 SV=1 -<br>[CL12A_MOUSE]                                                | 11.24 | 2  | 2  | 3  | 4   | 1.110 | 0.836 | 1.216 | 1.029 | 7.78   | 11.24 | 4  | 4   | 267   | 30.7   | 7.77 |
| Q7TMY4   | THO complex subunit 7<br>homolog OS=Mus<br>musculus GN=Thoc7 PE=1<br>SV=2 - [THOC7_MOUSE]                                                               | 15.20 | 3  | 4  | 4  | 7   | 1.518 | 1.141 | 1.056 | 1.030 | 14.65  | 15.20 | 6  | 7   | 204   | 23.7   | 5.67 |
| Q3U3E2   | Protein FAM117B OS=Mus<br>musculus GN=Fam117b<br>PE=1 SV=1 -<br>[F117B_MOUSE]                                                                           | 29.28 | 1  | 11 | 11 | 31  | 1.203 | 0.962 | 1.240 | 1.030 | 96.88  | 29.28 | 16 | 31  | 584   | 61.3   | 9.95 |
| Q9D853   | Methyltransferase-like<br>protein 10 OS=Mus<br>musculus GN=Met10<br>PE=2 SV=1 -                                                                         | 23.36 | 2  | 4  | 4  | 7   | 1.000 | 1.314 | 0.931 | 1.030 | 22.01  | 23.36 | 7  | 7   | 244   | 26.8   | 5.15 |
| O08579   | Emerin OS=Mus musculus<br>GN=Emd PE=1 SV=1 -<br>[FMD_MOUSE]                                                                                             | 39.38 | 3  | 3  | 8  | 39  | 0.722 | 1.340 | 0.938 | 1.030 | 133.84 | 39.38 | 13 | 39  | 259   | 29.4   | 5.01 |
| Q3TPJ8   | Cytoplasmic dynein 1<br>intermediate chain 2<br>OS=Mus musculus<br>GN=Dync1i2 PE=2 SV=1 -<br>[Q3TPJ8_MOUSE]                                             | 24.53 | 3  | 1  | 10 | 78  | 1.333 | 1.251 | 1.028 | 1.030 | 196.17 | 24.53 | 18 | 78  | 632   | 70.6   | 5.24 |
| Q8C172   | Ceramide synthase 6<br>OS=Mus musculus<br>GN=Cers6 PE=1 SV=1 -<br>[CERS6_MOUSE]                                                                         | 7.81  | 2  | 3  | 3  | 3   | 0.663 | 1.016 | 0.786 | 1.030 | 6.23   | 7.81  | 3  | 3   | 384   | 44.8   | 7.64 |
| Q8W65    | Protein convertase<br>subtilisin/kexin type 9<br>OS=Mus musculus<br>GN=Pcsk9 PE=1 SV=2 -<br>[PCSK9_MOUSE]                                               | 0.86  | 1  | 1  | 1  | 1   | 0.733 | 1.288 | 1.531 | 1.030 | 1.87   | 0.86  | 1  | 1   | 694   | 74.8   | 6.96 |
| A2ASS6   | Titin OS=Mus musculus<br>GN=Ttn PE=1 SV=1 -<br>[TTTN_MOUSE]                                                                                             | 1.84  | 13 | 45 | 53 | 91  | 1.188 | 1.050 | 1.030 | 1.030 | 163.31 | 1.84  | 58 | 91  | 35213 | 3904.1 | 6.20 |
| Q99LJ1   | Tissue alpha-L-fucosidase<br>OS=Mus musculus<br>GN=Fuca1 PE=2 SV=1 -<br>[FUCA_MOUSE]                                                                    | 1.55  | 1  | 1  | 1  | 1   | 0.917 | 1.317 | 0.844 | 1.030 | 2.59   | 1.55  | 1  | 1   | 452   | 52.2   | 6.95 |
| D6RG73   | Bifunctional apoptosis<br>regulator OS=Mus<br>musculus GN=Bfar PE=2<br>SV=1 - [D6RG73_MOUSE]                                                            | 7.95  | 2  | 1  | 1  | 7   | 0.861 | 0.716 | 0.935 | 1.030 | 23.10  | 7.95  | 2  | 7   | 176   | 20.1   | 6.65 |
| A2AMV1   | RIKEN cDNA 2610012022,<br>isoform CRA_a OS=Mus<br>musculus GN=Mrt4 PE=3<br>SV=1 - [A2AMV1_MOUSE]                                                        | 20.59 | 3  | 5  | 5  | 7   | 0.677 | 0.905 | 0.906 | 1.030 | 9.52   | 20.59 | 7  | 7   | 238   | 27.4   | 8.28 |
| Q9R1S3-2 | Isoform 2 of GPI<br>ethanolamine phosphate<br>transferase 1 OS=Mus<br>musculus GN=Pign -<br>[PIGN_MOUSE]                                                | 2.51  | 4  | 2  | 2  | 3   | 0.992 | 0.993 | 0.778 | 1.030 | 7.43   | 2.51  | 3  | 3   | 798   | 90.4   | 7.59 |
| P09671   | Superoxide dismutase<br>[Mn], mitochondrial<br>OS=Mus musculus<br>GN=Sod2 PE=1 SV=3 -<br>[SODM_MOUSE]                                                   | 67.12 | 1  | 12 | 12 | 193 | 1.668 | 0.976 | 1.040 | 1.030 | 511.46 | 67.12 | 23 | 193 | 222   | 24.6   | 8.62 |
| Q8VDV7   | Protein Tbcd19 OS=Mus<br>musculus GN=Tbcd19<br>PE=2 SV=1 -<br>[Q8VDV7_MOUSE]                                                                            | 12.36 | 1  | 5  | 5  | 17  | 0.938 | 1.140 | 0.963 | 1.030 | 43.15  | 12.36 | 9  | 17  | 526   | 60.4   | 6.10 |
| Q8BG02   | Serine/threonine-protein<br>phosphatase 2A 55 kDa<br>regulatory subunit B<br>gamma isoform OS=Mus<br>musculus GN=Ppp2r2c<br>PE=2 SV=1 -<br>[ZABG_MOUSE] | 16.78 | 1  | 6  | 10 | 22  | 1.140 | 1.088 | 1.298 | 1.030 | 61.96  | 16.78 | 13 | 22  | 447   | 51.4   | 6.37 |
| E9PU87   | Serine/threonine-protein<br>kinase SIK3 OS=Mus<br>musculus GN=Si3 PE=2<br>SV=1 - [E9PU87_MOUSE]                                                         | 31.85 | 7  | 31 | 34 | 130 | 0.944 | 0.693 | 0.927 | 1.030 | 354.74 | 31.85 | 57 | 130 | 1369  | 150.6  | 7.02 |
| Q5XPI3   | E3 ubiquitin-protein ligase<br>RNF123 OS=Mus musculus<br>GN=Rnf123 PE=2 SV=1 -<br>[RN123_MOUSE]                                                         | 8.22  | 7  | 9  | 11 | 32  | 0.892 | 0.929 | 1.007 | 1.030 | 76.24  | 8.22  | 19 | 32  | 1314  | 148.6  | 6.70 |
| E9PY61   | Protein Gpr179 OS=Mus<br>musculus GN=Gpr179<br>PE=4 SV=1 -<br>[E9PY61_MOUSE]                                                                            | 0.78  | 1  | 1  | 1  | 1   | 1.473 | 0.715 | 0.998 | 1.030 | 2.81   | 0.78  | 1  | 1   | 2293  | 248.6  | 5.55 |
| Q8BU5    | Translocase of inner<br>mitochondrial membrane<br>domain-containing protein<br>1 OS=Mus musculus<br>GN=Timmdc1 PE=2 SV=1 -<br>[TIDC1_MOUSE]             | 11.58 | 1  | 3  | 3  | 6   | 1.009 | 0.749 | 0.859 | 1.030 | 17.51  | 11.58 | 5  | 6   | 285   | 31.8   | 9.29 |
| Q9D6Z0-2 | Isoform 2 of Alpha-<br>ketoglutarate-dependent<br>dioxygenase alkb homolog<br>7 OS=Mus musculus<br>GN=Alkbh7 -<br>[ALKBH7_MOUSE]                        | 5.52  | 2  | 1  | 1  | 2   | 1.514 | 1.326 | 0.935 | 1.031 | 4.72   | 5.52  | 2  | 2   | 163   | 18.5   | 6.11 |

|          |                                                                                                               |       |   |    |    |     |       |       |       |       |        |       |    |     |      |       |       |
|----------|---------------------------------------------------------------------------------------------------------------|-------|---|----|----|-----|-------|-------|-------|-------|--------|-------|----|-----|------|-------|-------|
| Q2TPA8   | Hydroxysteroid dehydrogenase-like protein 2 OS=Mus musculus GN=Hsd12 PE=2 SV=1 - [HSDL2_MOUSE]                | 28.57 | 3 | 11 | 11 | 49  | 1.157 | 0.774 | 0.873 | 1.031 | 144.90 | 28.57 | 20 | 49  | 490  | 54.2  | 6.74  |
| E9PUUS   | Protein Zfp839 OS=Mus musculus GN=Zfp839 PE=4 SV=1 - [E9PUUS_MOUSE]                                           | 1.52  | 1 | 1  | 1  | 1   | 1.416 | 0.897 | 0.868 | 1.031 | 2.76   | 1.52  | 1  | 1   | 921  | 98.9  | 5.94  |
| Q99PUS   | Long-chain-fatty-acid-CoA ligase ACSBG1 OS=Mus musculus GN=Acsg1 PE=1 SV=1 - [ACBG1_MOUSE]                    | 55.76 | 3 | 35 | 35 | 168 | 0.727 | 0.560 | 0.803 | 1.031 | 521.69 | 55.76 | 61 | 168 | 721  | 80.4  | 5.94  |
| Q8CBC8   | Branched-chain-amino-acid aminotransferase OS=Mus musculus GN=Bcat1 PE=2 SV=1 - [Q8CBC8_MOUSE]                | 30.68 | 8 | 12 | 12 | 77  | 2.158 | 0.680 | 0.751 | 1.031 | 208.95 | 30.68 | 20 | 77  | 453  | 49.9  | 6.77  |
| P58242   | Acid sphingomyelinase-like phosphodiesterase 3b OS=Mus musculus GN=Smpd3b PE=1 SV=1 - [ASM3B_MOUSE]           | 12.94 | 2 | 4  | 5  | 17  | 1.313 | 3.424 | 1.216 | 1.031 | 56.70  | 12.94 | 9  | 17  | 456  | 51.6  | 6.43  |
| Q4VBD9   | GDNF-inducible zinc finger protein 1 OS=Mus musculus GN=Gzf1 PE=1 SV=2 - [GZF1_MOUSE]                         | 2.27  | 1 | 1  | 1  | 2   | 1.652 | 0.990 | 1.263 | 1.031 | 5.32   | 2.27  | 1  | 2   | 706  | 79.5  | 7.97  |
| A2AKQ3   | Protein Slc35d1 OS=Mus musculus GN=Slc35d1 PE=2 SV=1 - [A2AKQ3_MOUSE]                                         | 6.76  | 3 | 1  | 1  | 1   | 2.654 | 2.276 | 1.166 | 1.031 | 1.79   | 6.76  | 1  | 1   | 148  | 16.4  | 10.67 |
| Q9D5V2   | Kelch-like protein 10 OS=Mus musculus GN=Kih10 PE=1 SV=1 - [KLH10_MOUSE]                                      | 0.99  | 1 | 1  | 1  | 1   | 5.553 | 1.822 | 0.885 | 1.031 | 2.51   | 0.99  | 1  | 1   | 608  | 68.9  | 5.77  |
| F8WJ31   | Zinc finger and SCAN domain-containing protein 26 OS=Mus musculus GN=Zscan26 PE=2 SV=1 - [F8WJ31_MOUSE]       | 7.35  | 3 | 3  | 3  | 5   | 0.833 | 0.785 | 1.064 | 1.031 | 11.09  | 7.35  | 5  | 5   | 340  | 38.8  | 8.78  |
| E9PWW9   | Protein Rsf1 OS=Mus musculus GN=Rsf1 PE=2 SV=1 - [E9PWW9_MOUSE]                                               | 3.37  | 2 | 4  | 4  | 7   | 1.345 | 0.865 | 0.951 | 1.031 | 13.35  | 3.37  | 5  | 7   | 1426 | 160.5 | 5.02  |
| Q9DB60   | Prostamide/prostaglandin F synthase OS=Mus musculus GN=Fam213b PE=1 SV=1 - [PGFS_MOUSE]                       | 51.74 | 2 | 7  | 7  | 36  | 0.551 | 1.055 | 0.840 | 1.031 | 109.91 | 51.74 | 13 | 36  | 201  | 21.7  | 6.74  |
| B7ZDF4   | Histone deacetylase 5 (Fragment) OS=Mus musculus GN=Hdac5 PE=2 SV=1 - [B7ZDF4_MOUSE]                          | 44.57 | 1 | 1  | 7  | 18  | 1.318 | 0.908 | 0.808 | 1.031 | 43.58  | 44.57 | 12 | 18  | 175  | 20.0  | 9.03  |
| Q8C0T5   | Signal-induced proliferation-associated 1-like protein 1 OS=Mus musculus GN=Sipa11 PE=1 SV=2 - [SIPA11_MOUSE] | 37.43 | 2 | 43 | 47 | 129 | 1.136 | 1.622 | 1.885 | 1.031 | 412.99 | 37.43 | 76 | 129 | 1782 | 196.9 | 8.13  |
| E9Q605   | Inhibitor of nuclear factor kappa-B kinase subunit alpha OS=Mus musculus GN=Chuk PE=2 SV=1 - [E9Q605_MOUSE]   | 3.06  | 4 | 2  | 2  | 2   | 2.260 | 1.567 | 1.056 | 1.031 | 3.74   | 3.06  | 2  | 2   | 719  | 82.2  | 7.71  |
| Q9Z0U1   | Tight junction protein ZO-2 OS=Mus musculus GN=Tjp2 PE=1 SV=2 - [ZO2_MOUSE]                                   | 31.88 | 2 | 31 | 32 | 138 | 1.160 | 0.636 | 1.096 | 1.031 | 382.66 | 31.88 | 55 | 138 | 1167 | 131.2 | 6.79  |
| E0CY18   | ANI-type zinc finger protein 2B (Fragment) OS=Mus musculus GN=Zfand2b PE=2 SV=1 - [E0CY18_MOUSE]              | 33.94 | 2 | 7  | 7  | 42  | 1.803 | 1.067 | 1.548 | 1.031 | 100.03 | 33.94 | 12 | 42  | 218  | 23.7  | 7.72  |
| B2RR83   | Probable ATP-dependent RNA helicase YTHDC2 OS=Mus musculus GN=Ythdc2 PE=2 SV=1 - [YTHDC2_MOUSE]               | 10.10 | 1 | 13 | 13 | 29  | 0.703 | 0.932 | 0.968 | 1.031 | 83.92  | 10.10 | 22 | 29  | 1445 | 161.0 | 8.51  |
| J3QMK2   | MCG22959, isoform CRA_a OS=Mus musculus GN=Bbip1 PE=4 SV=1 - [J3QMK2_MOUSE]                                   | 14.93 | 1 | 1  | 1  | 4   | 1.799 | 1.016 | 1.272 | 1.031 | 14.01  | 14.93 | 2  | 4   | 67   | 7.6   | 8.76  |
| Q9R0N8-2 | Isoform 2 of Synaptotagmin-6 OS=Mus musculus GN=Sy6 - [SYT6_MOUSE]                                            | 38.03 | 4 | 10 | 12 | 41  | 0.886 | 0.532 | 0.836 | 1.031 | 108.81 | 38.03 | 21 | 41  | 426  | 48.3  | 8.43  |
| P03953-2 | Isoform 2 of Complement factor D OS=Mus musculus GN=Cfd - [CFAD_MOUSE]                                        | 13.18 | 2 | 3  | 3  | 6   | 1.871 | 1.088 | 0.937 | 1.031 | 15.35  | 13.18 | 5  | 6   | 258  | 28.0  | 6.67  |
| P82347   | Delta-sarcoglycan OS=Mus musculus GN=Sgcd PE=1 SV=1 - [SGCD_MOUSE]                                            | 13.84 | 2 | 4  | 4  | 7   | 6.909 | 1.666 | 1.119 | 1.031 | 20.18  | 13.84 | 6  | 7   | 289  | 32.1  | 9.10  |
| P57746   | V-type proton ATPase subunit D OS=Mus musculus GN=Atp6v1d PE=1 SV=1 - [ATP6V1D_MOUSE]                         | 72.87 | 1 | 18 | 19 | 135 | 0.786 | 1.318 | 1.052 | 1.032 | 403.13 | 72.87 | 31 | 135 | 247  | 28.4  | 9.45  |
| Q80UJ9   | Membrane-associated progesterone receptor component 2 OS=Mus musculus GN=Pgrmc2 PE=1 SV=2 - [PGRMC2_MOUSE]    | 52.07 | 1 | 9  | 11 | 53  | 0.676 | 1.137 | 0.886 | 1.032 | 169.31 | 52.07 | 20 | 53  | 217  | 23.3  | 5.15  |
| Q9R1R8   | Retinol dehydrogenase 11 OS=Mus musculus GN=Rdh11 PE=2 SV=1 - [Q9R1R8_MOUSE]                                  | 19.67 | 4 | 5  | 5  | 18  | 0.738 | 0.736 | 0.969 | 1.032 | 58.97  | 19.67 | 8  | 18  | 300  | 33.2  | 8.79  |



|          |                                                                                                                                                                                                                       |       |   |    |    |     |       |       |       |       |        |       |     |     |      |       |      |
|----------|-----------------------------------------------------------------------------------------------------------------------------------------------------------------------------------------------------------------------|-------|---|----|----|-----|-------|-------|-------|-------|--------|-------|-----|-----|------|-------|------|
| A2ATK9   | Family with sequence similarity 171, member A1<br>OS=Mus musculus<br>GN=Fam171a1 PE=2 SV=1 - [A2ATK9_MOUSE]                                                                                                           | 22.09 | 4 | 14 | 15 | 41  | 0.838 | 1.305 | 1.293 | 1.032 | 89.25  | 22.09 | 27  | 41  | 892  | 97.9  | 6.40 |
| Q6P6L6   | Gem (Nuclear organelle) associated protein 4<br>OS=Mus musculus<br>GN=Gemin4 PE=2 SV=1 - [Q6P6L6_MOUSE]                                                                                                               | 2.46  | 1 | 2  | 2  | 4   | 0.446 | 0.940 | 0.957 | 1.032 | 10.56  | 2.46  | 4   | 4   | 1058 | 120.1 | 5.15 |
| Q9Z1B3-3 | Isoform C of 1-phosphatidylinositol 4,5-bisphosphate phosphodiesterase beta-1<br>OS=Mus musculus<br>GN=Ptdc1 - [PLCB1_MOUSE]                                                                                          | 52.09 | 4 | 49 | 53 | 239 | 0.670 | 1.380 | 1.894 | 1.032 | 653.56 | 52.09 | 93  | 239 | 1198 | 136.2 | 6.34 |
| Q3UQ28   | Peroxidase homolog<br>OS=Mus musculus<br>GN=Pxdn PE=2 SV=2 - [PXDN_MOUSE]                                                                                                                                             | 3.19  | 1 | 4  | 4  | 7   | 1.526 | 1.679 | 1.560 | 1.032 | 5.96   | 3.19  | 4   | 7   | 1475 | 165.0 | 7.14 |
| J3Q22    | Serine/threonine-protein kinase SMG1<br>OS=Mus musculus<br>GN=Smg1 PE=4 SV=1 - [J3Q22_MOUSE]                                                                                                                          | 5.03  | 5 | 15 | 17 | 34  | 0.977 | 1.026 | 0.954 | 1.032 | 104.03 | 5.03  | 25  | 34  | 3582 | 401.4 | 6.30 |
| P30677   | Guanine nucleotide-binding protein subunit alpha-14<br>OS=Mus musculus<br>GN=Gna14 PE=1 SV=2 - [GNA14_MOUSE]                                                                                                          | 18.31 | 1 | 1  | 6  | 23  | 0.541 | 1.381 | 0.864 | 1.032 | 58.96  | 18.31 | 8   | 23  | 355  | 41.5  | 6.30 |
| Q8R104   | NAD-dependent protein deacetylase sirtuin-3<br>OS=Mus musculus<br>GN=Sirt3 PE=2 SV=1 - [SIRT3_MOUSE]                                                                                                                  | 17.51 | 3 | 1  | 4  | 14  | 0.574 | 0.955 | 0.878 | 1.032 | 42.48  | 17.51 | 8   | 14  | 257  | 28.8  | 6.23 |
| G3X9Y1   | Synaptotagmin III, isoform CRA_a<br>OS=Mus musculus<br>GN=Syts3 PE=4 SV=1 - [G3X9Y1_MOUSE]                                                                                                                            | 28.96 | 4 | 12 | 16 | 59  | 0.638 | 0.631 | 1.003 | 1.032 | 159.85 | 28.96 | 30  | 59  | 587  | 63.2  | 6.62 |
| B2RXC1   | Trafficking protein particle complex subunit 11<br>OS=Mus musculus<br>GN=Trappc11 PE=2 SV=1 - [TPC11_MOUSE]                                                                                                           | 15.53 | 2 | 15 | 16 | 34  | 0.571 | 0.917 | 0.946 | 1.032 | 82.92  | 15.53 | 27  | 34  | 1133 | 128.3 | 7.58 |
| Q80U63   | Mitofusin-2<br>OS=Mus musculus<br>GN=Mfn2 PE=1 SV=3 - [MFN2_MOUSE]                                                                                                                                                    | 32.23 | 4 | 19 | 20 | 66  | 0.660 | 0.995 | 0.987 | 1.032 | 203.16 | 32.23 | 30  | 66  | 757  | 86.1  | 6.77 |
| D3YYH1   | PEXS-related protein<br>OS=Mus musculus<br>GN=Pexs1 PE=2 SV=1 - [D3YYH1_MOUSE]                                                                                                                                        | 48.79 | 1 | 2  | 13 | 70  | 2.005 | 0.805 | 1.358 | 1.032 | 167.33 | 48.79 | 22  | 70  | 373  | 41.4  | 5.08 |
| Q8BG30   | Negative elongation factor A<br>OS=Mus musculus<br>GN=Nelfa PE=1 SV=1 - [NELFA_MOUSE]                                                                                                                                 | 20.94 | 1 | 9  | 9  | 28  | 1.004 | 0.709 | 1.029 | 1.032 | 64.41  | 20.94 | 14  | 28  | 530  | 57.5  | 9.11 |
| P49070   | Calcium signal-modulating cyclophilin ligand<br>OS=Mus musculus<br>GN=Camlg PE=1 SV=2 - [CAMLG_MOUSE]                                                                                                                 | 28.57 | 1 | 8  | 8  | 21  | 1.205 | 0.934 | 0.955 | 1.032 | 69.58  | 28.57 | 13  | 21  | 294  | 32.5  | 7.74 |
| Q6NZD2   | Sorting nexin 1<br>OS=Mus musculus<br>GN=Snx1 PE=2 SV=1 - [Q6NZD2_MOUSE]                                                                                                                                              | 44.15 | 3 | 20 | 22 | 99  | 1.092 | 1.128 | 0.857 | 1.032 | 322.04 | 44.15 | 37  | 99  | 521  | 58.8  | 5.26 |
| Q9QXB9   | Developmentally-regulated GTP-binding protein 2<br>OS=Mus musculus<br>GN=Drng2 PE=1 SV=1 - [DRG2_MOUSE]                                                                                                               | 36.54 | 1 | 10 | 12 | 41  | 0.508 | 0.843 | 0.849 | 1.032 | 140.28 | 36.54 | 20  | 41  | 364  | 40.7  | 8.88 |
| Q6IRU2   | Tropomyosin alpha-4 chain<br>OS=Mus musculus<br>GN=Tpm4 PE=2 SV=3 - [TPM4_MOUSE]                                                                                                                                      | 45.97 | 1 | 9  | 12 | 91  | 1.891 | 0.979 | 1.145 | 1.032 | 209.11 | 45.97 | 20  | 91  | 248  | 28.5  | 4.68 |
| Q8CFE4   | SCY1-like protein 2<br>OS=Mus musculus<br>GN=Scyl2 PE=1 SV=1 - [SCYL2_MOUSE]                                                                                                                                          | 26.77 | 2 | 1  | 22 | 84  | 0.671 | 0.960 | 1.109 | 1.032 | 249.48 | 26.77 | 38  | 84  | 930  | 103.3 | 8.02 |
| F6SPK0   | Ubiquitin-conjugating enzyme E2 J1 (Fragment)<br>OS=Mus musculus<br>GN=Ube2j1 PE=4 SV=1 - [F6SPK0_MOUSE]                                                                                                              | 19.08 | 2 | 3  | 3  | 31  | 1.191 | 0.801 | 1.052 | 1.032 | 100.91 | 19.08 | 6   | 31  | 262  | 28.9  | 7.25 |
| Q0KL02   | Triple functional domain protein<br>OS=Mus musculus<br>GN=Trio PE=1 SV=3 - [TRIO_MOUSE]                                                                                                                               | 28.14 | 3 | 1  | 74 | 226 | 1.476 | 2.221 | 1.018 | 1.032 | 640.96 | 28.14 | 125 | 226 | 3102 | 347.6 | 6.35 |
| Q8R516-2 | Isoform 2 of E3 ubiquitin-protein ligase MIB2<br>OS=Mus musculus<br>GN=Mib2 -                                                                                                                                         | 8.90  | 6 | 9  | 9  | 16  | 0.909 | 1.021 | 0.957 | 1.032 | 35.91  | 8.90  | 13  | 16  | 921  | 100.2 | 7.97 |
| Q3UP20   | Sema domain, seven thrombospondin repeats (Type 1 and type 1-like), transmembrane domain (TM) and short cytoplasmic domain, (Semaphorin) 5A, isoform CRA_a<br>OS=Mus musculus<br>GN=Sema5a PE=2 SV=1 - [Q3UP20_MOUSE] | 2.70  | 2 | 3  | 3  | 3   | 1.328 | 0.781 | 1.009 | 1.033 | 3.97   | 2.70  | 3   | 3   | 1074 | 120.2 | 7.06 |
| Q99J39-2 | Isoform Cytoplasmic+peroxisomal of Malonyl-CoA decarboxylase, mitochondrial<br>OS=Mus musculus                                                                                                                        | 36.56 | 2 | 11 | 12 | 45  | 0.781 | 0.933 | 0.924 | 1.033 | 142.98 | 36.56 | 21  | 45  | 454  | 50.7  | 7.88 |
| P08226   | Apolipoprotein E<br>OS=Mus musculus<br>GN=ApoE PE=1 SV=2 - [APOE_MOUSE]                                                                                                                                               | 36.01 | 8 | 14 | 14 | 128 | 1.325 | 2.078 | 0.956 | 1.033 | 380.28 | 36.01 | 25  | 128 | 311  | 35.8  | 5.68 |

|          |                                                                                                                             |       |    |    |    |     |       |       |       |       |        |       |    |     |      |       |       |
|----------|-----------------------------------------------------------------------------------------------------------------------------|-------|----|----|----|-----|-------|-------|-------|-------|--------|-------|----|-----|------|-------|-------|
| F7A5I8   | Prostate tumor-overexpressed gene 1 protein homolog (Fragment) OS=Mus musculus GN=Ptov1 PE=4 SV=1 - [F7A5I8_MOUSE]          | 6.96  | 2  | 1  | 1  | 4   | 0.831 | 0.675 | 0.698 | 1.033 | 13.38  | 6.96  | 2  | 4   | 158  | 18.6  | 9.73  |
| Q3UYI5   | Rai guanine nucleotide dissociation stimulator-like 3 OS=Mus musculus GN=Rgl3 PE=1 SV=2 - [RGL3_MOUSE]                      | 2.68  | 1  | 2  | 2  | 5   | 1.469 | 1.055 | 0.927 | 1.033 | 14.40  | 2.68  | 4  | 5   | 709  | 77.9  | 8.60  |
| P10605   | Cathepsin B OS=Mus musculus GN=Ctsb PE=1 SV=2 - [CATB_MOUSE]                                                                | 45.72 | 1  | 13 | 13 | 64  | 1.494 | 0.992 | 1.016 | 1.033 | 223.27 | 45.72 | 23 | 64  | 339  | 37.3  | 5.91  |
| E9PWV3   | Ribosomal protein S6 kinase OS=Mus musculus GN=Rps6ka1 PE=2 SV=1 - [E9PWV3_MOUSE]                                           | 27.26 | 15 | 6  | 16 | 52  | 0.921 | 0.800 | 0.858 | 1.033 | 136.63 | 27.26 | 28 | 52  | 719  | 81.3  | 8.54  |
| Q9ER00   | Syntaxin-12 OS=Mus musculus GN=Sbx12 PE=1 SV=1 - [STX12_MOUSE]                                                              | 43.43 | 1  | 10 | 10 | 56  | 0.898 | 1.198 | 1.023 | 1.033 | 173.74 | 43.43 | 19 | 56  | 274  | 31.2  | 5.44  |
| Q811L6   | Microtubule-associated serine/threonine-protein kinase 4 OS=Mus musculus GN=Mast4 PE=1 SV=3 - [MAST4_MOUSE]                 | 11.96 | 13 | 18 | 24 | 66  | 1.380 | 0.716 | 1.455 | 1.033 | 177.20 | 11.96 | 39 | 66  | 2618 | 283.8 | 8.62  |
| Q810B6   | Ankyrin repeat and FYVE domain-containing protein 1 OS=Mus musculus GN=Anky1 PE=2 SV=2 - [ANFY1_MOUSE]                      | 15.83 | 2  | 15 | 17 | 50  | 0.673 | 1.059 | 0.886 | 1.033 | 155.35 | 15.83 | 25 | 50  | 1169 | 128.6 | 5.91  |
| J3QP66   | G-protein-coupled receptor 124 (Fragment) OS=Mus musculus GN=Gpr124 PE=4 SV=1 - [J3QP66_MOUSE]                              | 10.95 | 1  | 1  | 1  | 1   | 3.201 | 1.094 | 0.950 | 1.033 | 0.00   | 10.95 | 1  | 1   | 210  | 23.2  | 6.51  |
| Q8BLY2   | Probable threonine-tRNA ligase 2, cytoplasmic OS=Mus musculus GN=Tarsl2 PE=2 SV=1 - [SYTC2_MOUSE]                           | 34.94 | 1  | 21 | 24 | 62  | 1.116 | 0.951 | 1.124 | 1.033 | 168.09 | 34.94 | 38 | 62  | 790  | 91.3  | 7.53  |
| Q61239   | Protein farnesyltransferase/geranylgeranyltransferase type-1 subunit alpha OS=Mus musculus GN=Fnta PE=1 SV=1 - [FNTA_MOUSE] | 35.28 | 2  | 10 | 11 | 36  | 1.354 | 0.814 | 0.881 | 1.033 | 102.27 | 35.28 | 18 | 36  | 377  | 44.0  | 4.93  |
| D3YX28   | Serine protease HTRA2, mitochondrial OS=Mus musculus GN=Htra2 PE=2 SV=1 - [D3YX28_MOUSE]                                    | 34.35 | 1  | 1  | 9  | 31  | 1.199 | 0.910 | 1.182 | 1.033 | 97.78  | 34.35 | 16 | 31  | 361  | 38.9  | 10.13 |
| D3Z442   | Uncharacterized protein OS=Mus musculus GN=Aamd1 PE=2 SV=1 - [D3Z442_MOUSE]                                                 | 62.59 | 9  | 9  | 9  | 26  | 2.076 | 0.789 | 1.171 | 1.033 | 72.10  | 62.59 | 15 | 26  | 139  | 15.2  | 9.10  |
| P14901   | Heme oxygenase 1 OS=Mus musculus GN=Hmox1 PE=1 SV=1 - [HMOX1_MOUSE]                                                         | 15.22 | 2  | 3  | 3  | 10  | 1.146 | 1.056 | 1.097 | 1.033 | 37.55  | 15.22 | 5  | 10  | 289  | 32.9  | 6.54  |
| Q9QXM1-3 | Isoform 3 of Junction-mediating and -regulatory protein OS=Mus musculus GN=Jmy - [JMY_MOUSE]                                | 13.17 | 5  | 10 | 11 | 20  | 0.909 | 0.584 | 0.972 | 1.033 | 59.59  | 13.17 | 15 | 20  | 964  | 108.6 | 6.13  |
| Q5ND28   | Scavenger receptor class F member 1 OS=Mus musculus GN=Scarf1 PE=1 SV=1 - [SREC_MOUSE]                                      | 1.22  | 1  | 1  | 1  | 1   | 1.719 | 1.202 | 1.211 | 1.033 | 1.83   | 1.22  | 1  | 1   | 820  | 87.4  | 6.04  |
| F7CC56   | Rb1-inducible coiled-coil protein 1 (Fragment) OS=Mus musculus GN=Rb1cc1 PE=4 SV=1 - [F7CC56_MOUSE]                         | 25.75 | 6  | 36 | 37 | 94  | 0.885 | 0.871 | 1.118 | 1.033 | 274.90 | 25.75 | 61 | 94  | 1468 | 168.9 | 5.52  |
| F8WIZ7   | Oxysterol-binding protein OS=Mus musculus GN=Osbp6 PE=2 SV=1 - [F8WIZ7_MOUSE]                                               | 20.99 | 1  | 2  | 16 | 48  | 1.092 | 1.010 | 1.286 | 1.033 | 128.97 | 20.99 | 27 | 48  | 967  | 109.7 | 7.27  |
| Q8BYI8   | Uncharacterized protein KIAA1467 OS=Mus musculus GN=Kiaa1467 PE=2 SV=1 - [KIAA1467_MOUSE]                                   | 11.38 | 2  | 7  | 7  | 22  | 0.671 | 0.924 | 0.917 | 1.033 | 60.67  | 11.38 | 10 | 22  | 624  | 67.0  | 5.03  |
| P63213   | Guanine nucleotide-binding protein G(I)/G(S)/G(O) subunit gamma-2 OS=Mus musculus GN=Gng2 PE=1 SV=1 - [GNG2_MOUSE]          | 61.97 | 1  | 4  | 5  | 182 | 0.782 | 1.189 | 1.053 | 1.033 | 534.64 | 61.97 | 10 | 182 | 71   | 7.8   | 7.99  |
| G5E819   | Serine/threonine-protein phosphatase OS=Mus musculus GN=Ppp5c PE=3 SV=1 - [G5E819_MOUSE]                                    | 51.10 | 13 | 25 | 25 | 132 | 1.060 | 1.030 | 1.040 | 1.033 | 394.09 | 51.10 | 44 | 132 | 499  | 56.8  | 6.20  |
| Q3U2A8   | Valine-tRNA ligase, mitochondrial OS=Mus musculus GN=Vars2 PE=2 SV=2 - [SYVM_MOUSE]                                         | 18.58 | 6  | 12 | 15 | 33  | 0.801 | 0.888 | 0.949 | 1.033 | 82.17  | 18.58 | 27 | 33  | 1060 | 118.4 | 7.14  |
| Q8BPU7   | Engulfment and cell motility protein 1 OS=Mus musculus GN=Elmo1 PE=1 SV=2 - [ELMO1_MOUSE]                                   | 34.39 | 4  | 18 | 24 | 74  | 0.803 | 0.871 | 1.027 | 1.033 | 197.64 | 34.39 | 36 | 74  | 727  | 83.9  | 6.28  |
| Q8VDL4-3 | Isoform 3 of ADP-dependent glucokinase OS=Mus musculus GN=Adpgk -                                                           | 30.91 | 3  | 10 | 10 | 25  | 0.883 | 0.815 | 0.763 | 1.033 | 72.80  | 30.91 | 18 | 25  | 495  | 53.7  | 5.62  |

|          |                                                                                                                          |       |    |    |    |     |       |       |       |       |         |       |    |     |      |       |       |
|----------|--------------------------------------------------------------------------------------------------------------------------|-------|----|----|----|-----|-------|-------|-------|-------|---------|-------|----|-----|------|-------|-------|
| Q8R5L1   | Complement component 1 Q subcomponent-binding protein, mitochondrial OS=Mus musculus GN=C1qbp PE=2 SV=1 - [Q8R5L1_MOUSE] | 51.97 | 2  | 8  | 8  | 181 | 2.234 | 1.047 | 1.397 | 1.034 | 582.48  | 51.97 | 16 | 181 | 279  | 31.0  | 4.87  |
| P63002   | Amino-terminal enhancer of split OS=Mus musculus GN=Aes PE=1 SV=1 - [AES_MOUSE]                                          | 16.75 | 2  | 3  | 3  | 11  | 0.776 | 0.786 | 0.958 | 1.034 | 26.79   | 16.75 | 6  | 11  | 197  | 22.0  | 6.37  |
| Q9CZ8    | Glutamy-HRNA(Gln) amidotransferase subunit A, mitochondrial OS=Mus musculus GN=Qrs1 PE=2 SV=1 - [GATA_MOUSE]             | 29.90 | 1  | 12 | 12 | 35  | 0.934 | 0.966 | 1.035 | 1.034 | 98.35   | 29.90 | 23 | 35  | 525  | 56.7  | 5.95  |
| Q61599   | Rho GDP-dissociation inhibitor 2 OS=Mus musculus GN=Arhgdib PE=1 SV=3 -                                                  | 28.50 | 2  | 4  | 4  | 16  | 1.454 | 1.235 | 1.029 | 1.034 | 51.62   | 28.50 | 8  | 16  | 200  | 22.8  | 5.11  |
| Q60823   | RAC-beta serine/threonine-protein kinase OS=Mus musculus GN=Akt2 PE=1 SV=1 - [AKT2_MOUSE]                                | 27.23 | 7  | 7  | 12 | 35  | 1.437 | 1.422 | 1.215 | 1.034 | 86.57   | 27.23 | 23 | 35  | 481  | 55.7  | 6.37  |
| Q9CQW3   | Vitamin K-dependent protein Z OS=Mus musculus GN=Proz PE=1 SV=1 - [PROZ_MOUSE]                                           | 5.01  | 1  | 2  | 2  | 5   | 5.350 | 2.554 | 0.612 | 1.034 | 14.94   | 5.01  | 3  | 5   | 399  | 44.3  | 5.90  |
| P56371   | Ras-related protein Rab-4A OS=Mus musculus GN=Rab4a PE=1 SV=2 - [RAB4A_MOUSE]                                            | 34.40 | 1  | 4  | 7  | 60  | 1.023 | 0.851 | 0.743 | 1.034 | 170.41  | 34.40 | 12 | 60  | 218  | 24.4  | 6.07  |
| Q9ESN9-4 | Isoform 1d of C-Jun-amino-terminal kinase-interacting protein 3 OS=Mus musculus GN=Mapk8ip3 - [JIP3_MOUSE]               | 28.37 | 10 | 3  | 31 | 128 | 0.575 | 0.717 | 0.829 | 1.034 | 391.37  | 28.37 | 53 | 128 | 1336 | 147.4 | 5.45  |
| Q3UDP0   | WD repeat-containing protein 41 OS=Mus musculus GN=Wdr41 PE=2 SV=1 -                                                     | 26.96 | 4  | 8  | 9  | 18  | 1.217 | 1.107 | 0.923 | 1.034 | 46.26   | 26.96 | 13 | 18  | 460  | 51.5  | 5.15  |
| Q3TSG4   | RNA demethylase ALKBH5 OS=Mus musculus GN=Alkbh5 PE=1 SV=2 - [ALKB5_MOUSE]                                               | 4.56  | 1  | 2  | 2  | 4   | 1.527 | 0.789 | 0.957 | 1.034 | 5.13    | 4.56  | 3  | 4   | 395  | 44.4  | 9.09  |
| E9Q1G8   | Septin-7 OS=Mus musculus GN=Sept7 PE=3 SV=2 - [E9Q1G8_MOUSE]                                                             | 63.16 | 3  | 1  | 27 | 547 | 0.619 | 0.884 | 1.006 | 1.034 | 1661.00 | 63.16 | 50 | 547 | 437  | 50.6  | 8.57  |
| Q80T11   | Usher syndrome type-1G protein homolog OS=Mus musculus GN=Ush1g PE=1 SV=1 - [USH1G_MOUSE]                                | 4.77  | 1  | 2  | 2  | 2   | 1.251 | 1.381 | 1.376 | 1.034 | 0.00    | 4.77  | 2  | 2   | 461  | 51.5  | 6.99  |
| P35700   | Peroxisome oxidin-1 OS=Mus musculus GN=Prdx1 PE=1 SV=1 - [PRDX1_MOUSE]                                                   | 66.33 | 4  | 13 | 15 | 349 | 1.664 | 0.907 | 1.074 | 1.034 | 856.65  | 66.33 | 30 | 349 | 199  | 22.2  | 8.12  |
| E9QMP6   | Serine/threonine-protein kinase MARK2 OS=Mus musculus GN=Mark2 PE=4 SV=2 - [E9QMP6_MOUSE]                                | 48.84 | 19 | 26 | 35 | 165 | 0.750 | 1.243 | 1.405 | 1.034 | 506.48  | 48.84 | 61 | 165 | 776  | 86.3  | 9.67  |
| Q8R420   | ATP-binding cassette sub-family A member 3 OS=Mus musculus GN=Abca3 PE=2 SV=3 - [ABCA3_MOUSE]                            | 4.58  | 2  | 7  | 8  | 18  | 1.260 | 0.891 | 1.007 | 1.034 | 47.57   | 4.58  | 13 | 18  | 1704 | 191.8 | 7.17  |
| Q9DBR1-2 | Isoform 2 of 5'-3' exonuclease 2 OS=Mus musculus GN=Xn2 -                                                                | 15.52 | 2  | 14 | 14 | 28  | 0.770 | 0.781 | 0.973 | 1.035 | 70.18   | 15.52 | 22 | 28  | 947  | 108.0 | 7.25  |
| F7BSN3   | Ubiquitin carboxyl-terminal hydrolase OS=Mus musculus GN=Usp34 PE=2 SV=1 - [F7BSN3_MOUSE]                                | 4.15  | 7  | 12 | 12 | 30  | 0.809 | 0.987 | 0.776 | 1.035 | 84.13   | 4.15  | 19 | 30  | 3255 | 370.4 | 5.72  |
| E9PZ15   | GDP-fucose protein O-fucosyltransferase 1 OS=Mus musculus GN=Pofut1 PE=2 SV=1 - [E9PZ15_MOUSE]                           | 19.19 | 2  | 1  | 4  | 8   | 1.058 | 1.374 | 0.937 | 1.035 | 23.50   | 19.19 | 7  | 8   | 297  | 33.6  | 8.46  |
| Q9WU11   | Mitogen-activated protein kinase 11 OS=Mus musculus GN=Mapk11 PE=1 SV=2 -                                                | 9.34  | 8  | 1  | 2  | 15  | 0.974 | 1.326 | 1.137 | 1.035 | 35.05   | 9.34  | 4  | 15  | 364  | 41.4  | 5.78  |
| Q69ZP3-2 | Isoform 2 of Probable hydrolase PNKD OS=Mus musculus GN=Pnkd - [PNKD_MOUSE]                                              | 19.01 | 1  | 1  | 2  | 4   | 1.437 | 1.124 | 1.390 | 1.035 | 13.35   | 19.01 | 3  | 4   | 142  | 15.6  | 10.18 |
| Q8CE33-2 | Isoform 2 of Kelch-like protein 11 OS=Mus musculus GN=Kih11 - [KLH11_MOUSE]                                              | 4.92  | 2  | 2  | 2  | 6   | 1.177 | 1.252 | 0.909 | 1.035 | 12.92   | 4.92  | 3  | 6   | 569  | 66.0  | 6.58  |
| P22005   | Proenkephalin-A OS=Mus musculus GN=Penk PE=2 SV=2 - [PENK_MOUSE]                                                         | 32.84 | 2  | 7  | 7  | 30  | 3.321 | 1.103 | 2.512 | 1.035 | 81.57   | 32.84 | 10 | 30  | 268  | 31.0  | 5.68  |
| Q61488   | Desert hedgehog protein OS=Mus musculus GN=Dhh PE=1 SV=1 - [DHH_MOUSE]                                                   | 4.29  | 1  | 1  | 1  | 3   | 1.152 | 0.827 | 1.284 | 1.035 | 7.31    | 4.29  | 1  | 3   | 396  | 43.5  | 9.39  |
| H3BK66   | WD repeat-containing protein 37 (Fragment) OS=Mus musculus GN=Wdr37 PE=2 SV=1 - [H3BK66_MOUSE]                           | 51.13 | 5  | 1  | 6  | 35  | 0.720 | 0.608 | 0.852 | 1.035 | 105.57  | 51.13 | 11 | 35  | 133  | 14.9  | 9.31  |

|          |                                                                                                                            |       |   |    |    |     |       |       |       |       |        |       |    |     |      |       |      |
|----------|----------------------------------------------------------------------------------------------------------------------------|-------|---|----|----|-----|-------|-------|-------|-------|--------|-------|----|-----|------|-------|------|
| Q64689   | Sia-alpha-2,3-Gal-beta-1,4-GlcNAc-R:alpha 2,8-sialyltransferase OS=Mus musculus GN=St8sia3 PE=2 SV=2 - [ST8SIA3_MOUSE]     | 19.47 | 2 | 7  | 7  | 15  | 0.829 | 0.926 | 0.894 | 1.035 | 43.82  | 19.47 | 12 | 15  | 380  | 43.9  | 9.52 |
| Q6PAL8   | DEIN domain-containing protein 5A OS=Mus musculus GN=Dennd5a PE=1 SV=1 - [DENSA_MOUSE]                                     | 15.23 | 1 | 12 | 16 | 47  | 0.804 | 0.728 | 0.865 | 1.035 | 118.33 | 15.23 | 28 | 47  | 1287 | 146.6 | 6.70 |
| Q8CCX5   | Keratin-like protein KRT222 OS=Mus musculus GN=Krt222 PE=2 SV=1 - [KRT222_MOUSE]                                           | 33.67 | 2 | 8  | 9  | 28  | 1.743 | 0.431 | 1.080 | 1.035 | 63.19  | 33.67 | 16 | 28  | 294  | 34.2  | 5.78 |
| P59764   | Dedicator of cytokinesis protein 4 OS=Mus musculus GN=Dock4 PE=1 SV=1 - [DOCK4_MOUSE]                                      | 16.43 | 2 | 27 | 29 | 103 | 0.864 | 1.340 | 1.171 | 1.035 | 257.07 | 16.43 | 50 | 103 | 1978 | 226.4 | 7.65 |
| Q9JKD3   | Secretory carrier-associated membrane protein 5 OS=Mus musculus GN=Scamp5 PE=2 SV=1 - [SCAMP5_MOUSE]                       | 28.51 | 1 | 4  | 4  | 37  | 0.531 | 1.055 | 1.006 | 1.036 | 76.42  | 28.51 | 7  | 37  | 235  | 26.1  | 8.54 |
| Q9D8C6   | Mediator of RNA polymerase II transcription subunit 11 OS=Mus musculus GN=Med11 PE=2 SV=1 - [MED11_MOUSE]                  | 31.62 | 2 | 2  | 2  | 4   | 1.100 | 1.288 | 1.065 | 1.036 | 12.49  | 31.62 | 4  | 4   | 117  | 13.1  | 5.96 |
| Q9CRC6   | UPO939 protein C10orf32 homolog OS=Mus musculus PE=1 SV=1 - [C1032_MOUSE]                                                  | 58.10 | 1 | 4  | 4  | 21  | 1.711 | 1.144 | 1.398 | 1.036 | 94.38  | 58.10 | 8  | 21  | 105  | 11.5  | 6.79 |
| E9QLB2   | Lysophospholipase-like protein 1 OS=Mus musculus GN=Lyp1a1 PE=4 SV=1 - [LYP1A1_MOUSE]                                      | 20.50 | 2 | 4  | 4  | 11  | 0.838 | 0.775 | 0.763 | 1.036 | 35.98  | 20.50 | 6  | 11  | 239  | 26.3  | 7.88 |
| Q64314-2 | Isoform Short of Hematopoietic progenitor cell antigen CD34 OS=Mus musculus GN=Cd34 - [CD34_MOUSE]                         | 11.08 | 2 | 5  | 5  | 14  | 0.844 | 0.861 | 1.185 | 1.036 | 40.97  | 11.08 | 9  | 14  | 325  | 35.2  | 5.16 |
| O88485   | Cytoplasmic dynein 1 intermediate chain 1 OS=Mus musculus GN=Dync1i1 PE=1 SV=2 - [DC1I1_MOUSE]                             | 31.37 | 5 | 12 | 13 | 102 | 1.629 | 0.926 | 1.061 | 1.036 | 293.28 | 31.37 | 24 | 102 | 628  | 70.7  | 5.12 |
| Q9ER88   | 28S ribosomal protein S29, mitochondrial OS=Mus musculus GN=Dap3 PE=2 SV=1 - [RT29_MOUSE]                                  | 19.69 | 9 | 6  | 6  | 21  | 0.885 | 0.918 | 0.986 | 1.036 | 69.51  | 19.69 | 11 | 21  | 391  | 44.7  | 8.94 |
| Q9DAI2   | Rab-like protein 5 OS=Mus musculus GN=Rab5 PE=2 SV=1 - [RABL5_MOUSE]                                                       | 36.22 | 1 | 5  | 5  | 29  | 1.472 | 1.400 | 0.931 | 1.036 | 82.82  | 36.22 | 10 | 29  | 185  | 20.8  | 5.25 |
| E9QAC9   | Calcium-independent phospholipase A2-gamma OS=Mus musculus GN=Pp1a8 PE=2 SV=1 - [E9QAC9_MOUSE]                             | 27.71 | 4 | 17 | 17 | 43  | 0.825 | 1.023 | 0.990 | 1.036 | 129.02 | 27.71 | 28 | 43  | 711  | 80.2  | 9.19 |
| P21447   | Multidrug resistance protein 1A OS=Mus musculus GN=Abcb1a PE=1 SV=3 - [ABCB1A_MOUSE]                                       | 25.78 | 3 | 26 | 29 | 109 | 0.933 | 1.505 | 0.962 | 1.036 | 298.30 | 25.78 | 51 | 109 | 1276 | 140.6 | 8.85 |
| O70589   | Peripheral plasma membrane protein CASK OS=Mus musculus GN=Cask PE=1 SV=2 - [CSKP_MOUSE]                                   | 50.32 | 9 | 36 | 40 | 159 | 0.722 | 1.055 | 0.996 | 1.036 | 458.35 | 50.32 | 65 | 159 | 926  | 105.0 | 6.43 |
| Q8K2Q5   | Coiled-coil-helix-coiled-coil-helix domain-containing protein 7 OS=Mus musculus GN=Chchd7 PE=2 SV=1 - [CHCHD7_MOUSE]       | 49.41 | 5 | 4  | 4  | 27  | 1.621 | 1.155 | 1.416 | 1.036 | 64.63  | 49.41 | 8  | 27  | 85   | 10.1  | 8.51 |
| P62715   | Serine/threonine-protein phosphatase 2A catalytic subunit beta isoform OS=Mus musculus GN=Ppp2cb PE=1 SV=1 - [PP2AB_MOUSE] | 66.02 | 1 | 2  | 15 | 297 | 1.003 | 0.988 | 1.022 | 1.036 | 938.81 | 66.02 | 30 | 297 | 309  | 35.6  | 5.43 |
| Q9D142   | Uridine diphosphate glucose pyrophosphatase OS=Mus musculus GN=Nudt14 PE=2 SV=1 - [NUD14_MOUSE]                            | 16.22 | 1 | 3  | 3  | 10  | 1.499 | 0.870 | 0.753 | 1.036 | 28.53  | 16.22 | 6  | 10  | 222  | 24.4  | 5.14 |
| A2A4A6   | 1-phosphatidylinositol 4,5-bisphosphate phosphodiesterase gamma-1 OS=Mus musculus GN=Ptcg1 PE=4 SV=1 - [A2A4A6_MOUSE]      | 25.19 | 5 | 28 | 28 | 97  | 0.624 | 0.870 | 0.934 | 1.036 | 267.34 | 25.19 | 53 | 97  | 1290 | 148.4 | 5.99 |
| P18242   | Cathepsin D OS=Mus musculus GN=Ctsd PE=1 SV=1 - [CATD_MOUSE]                                                               | 43.90 | 3 | 15 | 15 | 65  | 1.374 | 0.989 | 0.962 | 1.036 | 183.81 | 43.90 | 27 | 65  | 410  | 44.9  | 7.15 |
| O88952   | Protein lin-7 homolog C OS=Mus musculus GN=Lin7c PE=1 SV=2 - [LIN7C_MOUSE]                                                 | 56.35 | 5 | 5  | 11 | 145 | 1.386 | 1.062 | 1.128 | 1.036 | 331.63 | 56.35 | 19 | 145 | 197  | 21.8  | 8.43 |
| Q8C754   | Vacuolar protein sorting-associated protein 52 homolog OS=Mus musculus GN=Vps52 PE=2 SV=1 - [VPS52_MOUSE]                  | 40.11 | 3 | 22 | 22 | 87  | 0.728 | 1.108 | 0.982 | 1.036 | 265.56 | 40.11 | 37 | 87  | 723  | 82.0  | 5.90 |

|          |                                                                                                               |       |   |    |    |     |       |       |       |       |        |       |    |     |      |       |       |
|----------|---------------------------------------------------------------------------------------------------------------|-------|---|----|----|-----|-------|-------|-------|-------|--------|-------|----|-----|------|-------|-------|
| Q64322   | Neural proliferation differentiation and control protein 1 OS=Mus musculus GN=Npdc1 PE=2 SV=2 - [NPDC1_MOUSE] | 40.06 | 5 | 9  | 10 | 28  | 1.039 | 1.085 | 0.879 | 1.036 | 83.06  | 40.06 | 17 | 28  | 332  | 35.7  | 7.12  |
| D3YUW8   | Pogo transposable element with ZNF domain OS=Mus musculus GN=Pogz PE=2 SV=1 - [D3YUW8_MOUSE]                  | 9.74  | 5 | 10 | 11 | 20  | 0.760 | 0.946 | 1.056 | 1.036 | 47.56  | 9.74  | 17 | 20  | 1314 | 144.8 | 7.28  |
| O35245-5 | Isoform 5 of Polycystin-2 OS=Mus musculus GN=Pkd2 - [PKD2_MOUSE]                                              | 6.19  | 5 | 4  | 4  | 6   | 0.940 | 1.500 | 0.801 | 1.037 | 21.40  | 6.19  | 5  | 6   | 872  | 98.0  | 6.68  |
| Q3UHF7   | Transcription factor HIVEP2 OS=Mus musculus GN=Hivep2 PE=1 SV=1 - [ZEP2_MOUSE]                                | 6.71  | 1 | 12 | 12 | 15  | 0.979 | 1.264 | 1.561 | 1.037 | 36.62  | 6.71  | 15 | 15  | 2430 | 266.5 | 6.96  |
| Q80Y81-2 | Isoform 2 of Zinc phosphodiesterase ELAC protein 2 OS=Mus musculus GN=Elac2 - [RNZ2_MOUSE]                    | 14.08 | 4 | 10 | 10 | 19  | 1.106 | 0.763 | 1.009 | 1.037 | 60.20  | 14.08 | 15 | 19  | 824  | 92.0  | 7.43  |
| D3YUE4   | Protein Fam151b OS=Mus musculus GN=Fam151b PE=4 SV=1 - [D3YUE4_MOUSE]                                         | 13.98 | 1 | 3  | 3  | 6   | 1.095 | 1.206 | 1.263 | 1.037 | 11.80  | 13.98 | 3  | 6   | 279  | 31.4  | 6.11  |
| Q8BTJ4-2 | Isoform 2 of Bis(5'-adenosyl)-triphosphatase enpp4 OS=Mus musculus GN=Enpp4 - [ENPP4_MOUSE]                   | 24.82 | 4 | 7  | 7  | 10  | 1.249 | 0.974 | 0.742 | 1.037 | 20.15  | 24.82 | 10 | 10  | 423  | 47.9  | 6.73  |
| Q8BRF7-3 | Isoform 3 of Sec1 family domain-containing protein 1 OS=Mus musculus GN=Scfd1 - [SCFD1_MOUSE]                 | 45.39 | 3 | 20 | 20 | 72  | 0.668 | 0.803 | 0.820 | 1.037 | 233.15 | 45.39 | 33 | 72  | 597  | 67.4  | 5.74  |
| Q9CR95   | Adaptin ear-binding coat-associated protein 1 OS=Mus musculus GN=Necap1 PE=1 SV=2 - [NECP1_MOUSE]             | 44.00 | 1 | 9  | 9  | 102 | 1.350 | 1.354 | 1.191 | 1.037 | 300.60 | 44.00 | 17 | 102 | 275  | 29.6  | 6.38  |
| P35441   | Thrombospondin-1 OS=Mus musculus GN=Thbs1 PE=1 SV=1 - [TSP1_MOUSE]                                            | 7.52  | 2 | 9  | 9  | 22  | 1.575 | 2.566 | 0.714 | 1.037 | 62.61  | 7.52  | 13 | 22  | 1170 | 129.6 | 4.96  |
| P70697   | Uroporphyrinogen decarboxylase OS=Mus musculus GN=Urod PE=1 SV=2 - [DCUP_MOUSE]                               | 46.05 | 1 | 11 | 11 | 38  | 1.234 | 0.829 | 0.866 | 1.037 | 127.26 | 46.05 | 18 | 38  | 367  | 40.7  | 6.65  |
| Q9Z0P5-2 | Isoform 2 of Twinfilin-2 OS=Mus musculus GN=Twf2 - [TWF2_MOUSE]                                               | 53.03 | 4 | 10 | 15 | 57  | 1.029 | 1.215 | 1.073 | 1.037 | 155.98 | 53.03 | 27 | 57  | 347  | 39.3  | 6.70  |
| O88622-2 | Isoform 2 of Poly(ADP-ribose) glycohydrolase OS=Mus musculus GN=Parg -                                        | 11.85 | 6 | 9  | 10 | 19  | 0.766 | 0.872 | 1.055 | 1.037 | 48.93  | 11.85 | 12 | 19  | 920  | 103.7 | 6.80  |
| Q52KH6   | Predicted gene, OTTMUSG00000017677 OS=Mus musculus GN=DXBay18 PE=2 SV=1 - [Q52KH6_MOUSE]                      | 3.31  | 1 | 1  | 2  | 3   | 3.358 | 1.344 | 1.192 | 1.037 | 5.87   | 3.31  | 2  | 3   | 695  | 77.0  | 10.13 |
| F8VPT3   | Protein Lct OS=Mus musculus GN=Lct PE=3 SV=1 - [F8VPT3_MOUSE]                                                 | 1.97  | 1 | 2  | 2  | 2   | 1.461 | 1.713 | 1.343 | 1.037 | 2.80   | 1.97  | 2  | 2   | 1931 | 217.7 | 6.74  |
| Q3UN10   | Wolframin OS=Mus musculus GN=Wfs1 PE=2 SV=1 - [Q3UN10_MOUSE]                                                  | 14.99 | 3 | 12 | 12 | 43  | 0.706 | 1.758 | 1.653 | 1.037 | 95.27  | 14.99 | 18 | 43  | 814  | 91.8  | 7.99  |
| Q9CWS0   | N(G),N(G)-dimethylarginine dimethylaminohydrolase 1 OS=Mus musculus GN=DDah1 PE=1 SV=3 - [DDAH1_MOUSE]        | 77.19 | 2 | 18 | 19 | 188 | 1.186 | 1.039 | 1.311 | 1.037 | 567.14 | 77.19 | 37 | 188 | 285  | 31.4  | 5.97  |
| Q8BNE1-3 | Isoform 3 of Protein FAM115A OS=Mus musculus GN=Fam115a - [F115A_MOUSE]                                       | 17.67 | 3 | 7  | 7  | 12  | 0.820 | 0.832 | 0.655 | 1.037 | 21.63  | 17.67 | 9  | 12  | 498  | 56.6  | 8.75  |
| Q99J31   | Oligophrenin-1 OS=Mus musculus GN=Ophn1 PE=2 SV=1 - [OPHN1_MOUSE]                                             | 13.97 | 3 | 12 | 12 | 29  | 1.080 | 1.292 | 0.963 | 1.037 | 68.18  | 13.97 | 21 | 29  | 802  | 91.9  | 7.96  |
| Q8BH20   | Protein FAM49A OS=Mus musculus GN=Fam49a PE=2 SV=1 - [FA49A_MOUSE]                                            | 49.85 | 1 | 8  | 12 | 84  | 0.923 | 1.545 | 1.330 | 1.037 | 254.96 | 49.85 | 21 | 84  | 323  | 37.3  | 6.01  |
| Q8C2E7   | WASH complex subunit strumpellin OS=Mus musculus GN=Kiaa0196 PE=2 SV=2 -                                      | 29.34 | 2 | 29 | 30 | 78  | 0.730 | 0.992 | 0.858 | 1.038 | 251.56 | 29.34 | 53 | 78  | 1159 | 134.0 | 7.12  |
| Q99LU0   | Charged multivesicular body protein 1b-1 OS=Mus musculus GN=Chmp1b1 PE=1 SV=1 - [CH1B1_MOUSE]                 | 30.15 | 1 | 3  | 9  | 35  | 1.811 | 0.742 | 1.072 | 1.038 | 85.15  | 30.15 | 15 | 35  | 199  | 22.1  | 8.10  |
| E9Q2H1   | E3 ubiquitin-protein ligase UBR5 OS=Mus musculus GN=Ubr5 PE=2 SV=1 - [E9Q2H1_MOUSE]                           | 4.07  | 2 | 8  | 8  | 12  | 1.114 | 0.955 | 1.197 | 1.038 | 39.91  | 4.07  | 10 | 12  | 2798 | 308.8 | 5.83  |
| O89053   | Coronin-1A OS=Mus musculus GN=Coro1a PE=1 SV=5 - [COR1A_MOUSE]                                                | 41.87 | 4 | 6  | 19 | 94  | 0.882 | 1.575 | 1.533 | 1.038 | 255.85 | 41.87 | 34 | 94  | 461  | 51.0  | 6.48  |
| Q60737   | Casein kinase II subunit alpha OS=Mus musculus GN=Csk2a1 PE=1 SV=2 - [CSK21_MOUSE]                            | 53.71 | 3 | 15 | 18 | 140 | 1.013 | 0.836 | 1.096 | 1.038 | 388.01 | 53.71 | 35 | 140 | 391  | 45.1  | 7.74  |

|          |                                                                                                                      |       |   |    |     |     |       |       |       |       |         |       |     |     |      |       |       |
|----------|----------------------------------------------------------------------------------------------------------------------|-------|---|----|-----|-----|-------|-------|-------|-------|---------|-------|-----|-----|------|-------|-------|
| Q00558   | Factor VIII intron 22 protein OS=Mus musculus GN=Fba1 PE=2 SV=1 - [FB12_MOUSE]                                       | 24.47 | 2 | 5  | 5   | 18  | 0.687 | 1.175 | 1.372 | 1.038 | 72.38   | 24.47 | 10  | 18  | 380  | 40.5  | 6.89  |
| Q9EQM3   | Homeobox protein Nlx-2.4 OS=Mus musculus GN=Nlx2-4 PE=2 SV=2 - [Nlx24_MOUSE]                                         | 6.21  | 1 | 1  | 1   | 1   | 1.137 | 0.645 | 1.115 | 1.038 | 2.47    | 6.21  | 1   | 1   | 354  | 36.2  | 9.58  |
| Q9QXZ0-4 | Isoform 4 of Microtubule-actin cross-linking factor 1 OS=Mus musculus GN=Macf1 - [MACF1_MOUSE]                       | 44.32 | 7 | 2  | 212 | 896 | 0.919 | 0.794 | 0.944 | 1.038 | 2586.69 | 44.32 | 377 | 896 | 5478 | 621.8 | 5.40  |
| E9Q7U2   | Calcium-binding and coiled-coil domain-containing protein 1 OS=Mus musculus GN=Calcoco1 PE=2 SV=1 - [CALCOCO1_MOUSE] | 32.70 | 3 | 21 | 21  | 82  | 1.412 | 1.157 | 1.814 | 1.038 | 238.17  | 32.70 | 34  | 82  | 633  | 70.9  | 4.86  |
| A2ADX0   | 72 kDa inositol polyphosphate 5-phosphatase OS=Mus musculus GN=Inpp5e PE=4 SV=1 - [INPP5E_MOUSE]                     | 12.73 | 3 | 4  | 7   | 17  | 1.451 | 0.845 | 1.362 | 1.038 | 41.01   | 12.73 | 11  | 17  | 605  | 67.2  | 9.07  |
| Q9EQH3   | Vacuolar protein sorting-associated protein 35 OS=Mus musculus GN=Vps35 PE=1 SV=1 - [VPS35_MOUSE]                    | 44.85 | 1 | 29 | 30  | 159 | 0.580 | 1.141 | 0.879 | 1.038 | 468.47  | 44.85 | 49  | 159 | 796  | 91.7  | 5.44  |
| Q9Z2G0   | Protein fem-1 homolog B OS=Mus musculus GN=Fem1b PE=1 SV=1 - [FEM1B_MOUSE]                                           | 8.29  | 1 | 3  | 4   | 7   | 1.543 | 1.078 | 0.798 | 1.038 | 7.15    | 8.29  | 5   | 7   | 627  | 70.2  | 6.61  |
| Q3TYD4   | Arylsulfatase G OS=Mus musculus GN=Arsg PE=2 SV=1 - [ARSG_MOUSE]                                                     | 12.57 | 2 | 6  | 6   | 18  | 3.592 | 0.440 | 1.356 | 1.038 | 53.70   | 12.57 | 12  | 18  | 525  | 57.4  | 6.39  |
| Q8BGN3   | Ectonucleotide pyrophosphatase/phosphodiesterase family member 6 OS=Mus musculus GN=Enpp6 PE=2 SV=1 - [ENPP6_MOUSE]  | 43.41 | 3 | 15 | 15  | 79  | 1.964 | 0.487 | 0.900 | 1.038 | 235.05  | 43.41 | 28  | 79  | 440  | 50.6  | 7.31  |
| Q9DC07   | LIM zinc-binding domain-containing Nebulette OS=Mus musculus GN=Nebi PE=2 SV=1 - [LINEBL_MOUSE]                      | 54.81 | 1 | 8  | 16  | 127 | 1.743 | 1.292 | 1.551 | 1.038 | 362.41  | 54.81 | 29  | 127 | 270  | 31.1  | 8.31  |
| D3YXV8   | Leukocyte receptor cluster member 8 homolog (Fragment) OS=Mus musculus GN=Leng8 PE=2 SV=1 - [D3YXV8_MOUSE]           | 6.17  | 7 | 3  | 3   | 7   | 0.964 | 1.011 | 0.928 | 1.039 | 17.40   | 6.17  | 5   | 7   | 729  | 80.7  | 9.36  |
| Q8BN59   | La-related protein 6 OS=Mus musculus GN=Larp6 PE=1 SV=1 - [LARRP6_MOUSE]                                             | 26.83 | 1 | 11 | 11  | 31  | 0.996 | 0.770 | 1.236 | 1.039 | 81.97   | 26.83 | 18  | 31  | 492  | 54.8  | 7.90  |
| Q5DQR4   | Syntaxin-binding protein 5-like OS=Mus musculus GN=Sbxp5l PE=1 SV=1 - [STBSL_MOUSE]                                  | 32.41 | 4 | 3  | 29  | 116 | 0.686 | 1.099 | 1.617 | 1.039 | 374.73  | 32.41 | 51  | 116 | 1185 | 131.8 | 6.86  |
| A2AQH1   | Ceramide kinase-like isoform 1 OS=Mus musculus GN=Cerk1 PE=2 SV=1 - [A2AQH1_MOUSE]                                   | 5.33  | 1 | 3  | 3   | 3   | 1.660 | 1.524 | 0.825 | 1.039 | 5.11    | 5.33  | 3   | 3   | 525  | 58.7  | 8.16  |
| E9PV86   | Protein Mctp1 OS=Mus musculus GN=Mctp1 PE=2 SV=1 - [E9PV86_MOUSE]                                                    | 11.67 | 4 | 7  | 7   | 9   | 0.638 | 1.719 | 2.061 | 1.039 | 31.58   | 11.67 | 8   | 9   | 951  | 106.7 | 8.37  |
| Q8C3X4-2 | Isoform 2 of Translation factor Guf1, mitochondrial OS=Mus musculus GN=Guf1 - [GUF1_MOUSE]                           | 3.37  | 4 | 2  | 2   | 4   | 1.359 | 1.326 | 1.127 | 1.039 | 11.29   | 3.37  | 3   | 4   | 563  | 62.9  | 8.94  |
| P61971   | Nuclear transport factor 2 OS=Mus musculus GN=Nutf2 PE=2 SV=1 - [NTF2_MOUSE]                                         | 55.91 | 1 | 4  | 5   | 41  | 0.894 | 0.990 | 0.831 | 1.039 | 134.18  | 55.91 | 9   | 41  | 127  | 14.5  | 5.38  |
| P61358   | 60S ribosomal protein L27 OS=Mus musculus GN=Rpl27 PE=2 SV=2 - [RL27_MOUSE]                                          | 47.06 | 3 | 5  | 6   | 28  | 0.533 | 1.006 | 0.892 | 1.039 | 70.53   | 47.06 | 12  | 28  | 136  | 15.8  | 10.56 |
| O88834   | SH2 domain-containing adapter protein D OS=Mus musculus GN=Shd PE=1 SV=1 - [SHD_MOUSE]                               | 34.99 | 2 | 8  | 9   | 32  | 1.770 | 0.659 | 1.238 | 1.039 | 88.07   | 34.99 | 16  | 32  | 343  | 38.5  | 5.05  |
| Q5RJI5   | Serine/threonine-protein kinase BRSK1 OS=Mus musculus GN=Brsk1 PE=1 SV=1 - [BRSK1_MOUSE]                             | 43.19 | 5 | 22 | 27  | 122 | 0.945 | 0.793 | 1.116 | 1.039 | 361.63  | 43.19 | 46  | 122 | 778  | 85.1  | 9.32  |
| Q9QXY7   | Membrane transport protein XK OS=Mus musculus GN=Xk PE=1 SV=1 - [XK_MOUSE]                                           | 4.26  | 1 | 1  | 2   | 6   | 1.298 | 0.885 | 1.133 | 1.039 | 14.69   | 4.26  | 4   | 6   | 446  | 51.1  | 8.19  |
| Q62230   | Sialoadhesin OS=Mus musculus GN=Siglec1 PE=1 SV=2 - [SN_MOUSE]                                                       | 5.55  | 6 | 5  | 5   | 8   | 1.496 | 1.902 | 1.283 | 1.039 | 16.73   | 5.55  | 5   | 8   | 1695 | 182.9 | 6.67  |
| Q5F459   | Protein Trpm3 OS=Mus musculus GN=Trpm3 PE=2 SV=1 - [Q5F459_MOUSE]                                                    | 17.49 | 4 | 1  | 25  | 77  | 0.502 | 0.793 | 0.752 | 1.039 | 211.45  | 17.49 | 46  | 77  | 1721 | 196.2 | 7.56  |
| A2AJK8   | Tetrapeptide repeat protein 1 OS=Mus musculus GN=Tct1 PE=2 SV=1 - [A2AJK8_MOUSE]                                     | 27.60 | 2 | 9  | 9   | 37  | 1.291 | 0.934 | 1.110 | 1.039 | 92.69   | 27.60 | 15  | 37  | 250  | 28.5  | 4.93  |

|          |                                                                                                                   |       |    |    |    |     |       |       |       |       |         |       |    |     |      |       |       |
|----------|-------------------------------------------------------------------------------------------------------------------|-------|----|----|----|-----|-------|-------|-------|-------|---------|-------|----|-----|------|-------|-------|
| Q61598   | Rab GDP dissociation inhibitor beta OS=Mus musculus GN=Gdi2 PE=1 SV=1 - [GDIB_MOUSE]                              | 81.12 | 2  | 30 | 36 | 495 | 0.817 | 0.866 | 0.901 | 1.039 | 1393.38 | 81.12 | 66 | 495 | 445  | 50.5  | 6.25  |
| Q9D011   | M-phase-specific PLK1-interacting protein OS=Mus musculus GN=Mplkip PE=2 SV=1 - [MPLKI_MOUSE]                     | 22.47 | 2  | 2  | 2  | 16  | 1.329 | 1.168 | 1.329 | 1.039 | 17.95   | 22.47 | 3  | 16  | 178  | 19.0  | 10.23 |
| P70441   | Na(+)/H(+) exchange regulatory cofactor NHE-RF1 OS=Mus musculus GN=Slc9a3r1 PE=1 SV=3 - [NHRF1_MOUSE]             | 51.83 | 2  | 19 | 19 | 119 | 1.381 | 1.226 | 1.722 | 1.039 | 270.26  | 51.83 | 36 | 119 | 355  | 38.6  | 5.90  |
| Q8BUX1   | Protein Kih4 OS=Mus musculus GN=Kih4 PE=2 SV=1 - [Q8BUX1_MOUSE]                                                   | 1.87  | 4  | 1  | 1  | 3   | 0.895 | 0.500 | 0.790 | 1.039 | 10.13   | 1.87  | 2  | 3   | 589  | 65.4  | 6.37  |
| Q9EQX4   | Allograft inflammatory factor 1-like OS=Mus musculus GN=Aif1 PE=2 SV=1 - [AIF1_MOUSE]                             | 29.33 | 3  | 3  | 4  | 13  | 2.360 | 0.646 | 1.356 | 1.039 | 31.08   | 29.33 | 6  | 13  | 150  | 17.0  | 7.18  |
| AZAS93   | Caspase OS=Mus musculus GN=Casp9 PE=3 SV=1 - [AZAS93_MOUSE]                                                       | 12.59 | 3  | 3  | 3  | 5   | 1.024 | 1.023 | 1.032 | 1.039 | 7.40    | 12.59 | 5  | 5   | 405  | 44.3  | 5.83  |
| Q9ET22   | Dipeptidyl peptidase 2 OS=Mus musculus GN=Dpp7 PE=2 SV=2 - [DPP2_MOUSE]                                           | 10.67 | 1  | 5  | 5  | 9   | 0.847 | 1.019 | 0.802 | 1.039 | 26.99   | 10.67 | 9  | 9   | 506  | 56.2  | 5.39  |
| Q91WD0-2 | Isoform 2 of Protein GPR108 OS=Mus musculus GN=Gpr108 - [GP108_MOUSE]                                             | 4.27  | 2  | 1  | 1  | 1   | 1.555 | 1.145 | 0.986 | 1.040 | 0.00    | 4.27  | 1  | 1   | 562  | 63.2  | 7.55  |
| P51125-3 | Isoform 3 of Calpastatin OS=Mus musculus GN=Cast - [ICAL_MOUSE]                                                   | 37.30 | 8  | 18 | 18 | 72  | 2.382 | 0.968 | 1.224 | 1.040 | 216.91  | 37.30 | 32 | 72  | 740  | 79.6  | 5.54  |
| Q920R0   | Alsin OS=Mus musculus GN=Als2 PE=1 SV=3 - [AI2_MOUSE]                                                             | 15.20 | 2  | 16 | 18 | 46  | 0.784 | 0.940 | 1.093 | 1.040 | 133.12  | 15.20 | 32 | 46  | 1651 | 182.5 | 6.30  |
| Q9D2D9   | Kelch domain-containing protein 8B OS=Mus musculus GN=Kihdc8b PE=2 SV=1 - [KIHDC8B_MOUSE]                         | 14.41 | 2  | 3  | 4  | 5   | 0.939 | 1.490 | 0.916 | 1.040 | 8.88    | 14.41 | 5  | 5   | 354  | 37.6  | 8.09  |
| P50518   | V-type proton ATPase subunit E 1 OS=Mus musculus GN=Atp6v1e1 PE=1 SV=2 - [ATP6V1E1_MOUSE]                         | 64.60 | 2  | 16 | 16 | 537 | 1.009 | 1.565 | 1.088 | 1.040 | 1247.01 | 64.60 | 29 | 537 | 226  | 26.1  | 8.43  |
| Q60603   | Potassium voltage-gated channel subfamily H member 1 OS=Mus musculus GN=Kcnh1 PE=1 SV=1 - [KCNH1_MOUSE]           | 3.94  | 2  | 3  | 4  | 12  | 1.717 | 1.221 | 1.311 | 1.040 | 25.86   | 3.94  | 6  | 12  | 989  | 111.2 | 7.47  |
| Q9JLB0-2 | Isoform Alpha of MAGUK p55 subfamily member 6 OS=Mus musculus GN=Mpp6 - [MPP6_MOUSE]                              | 56.03 | 2  | 1  | 30 | 138 | 1.553 | 1.462 | 2.689 | 1.040 | 392.18  | 56.03 | 55 | 138 | 539  | 60.9  | 6.18  |
| Q6ZQ89-3 | Isoform 3 of E3 ubiquitin-protein ligase MARCH6 OS=Mus musculus GN=March6 - [MARCH6_MOUSE]                        | 6.00  | 3  | 3  | 3  | 5   | 0.958 | 1.005 | 0.908 | 1.040 | 9.86    | 6.00  | 4  | 5   | 883  | 99.2  | 6.07  |
| P62075   | Mitochondrial import inner membrane translocase subunit Tim13 OS=Mus musculus GN=Timm13 PE=1 SV=1 - [TIM13_MOUSE] | 61.05 | 1  | 5  | 5  | 54  | 1.914 | 0.720 | 1.331 | 1.040 | 119.85  | 61.05 | 10 | 54  | 95   | 10.5  | 8.18  |
| Q920Y1   | Dynactin subunit 3 OS=Mus musculus GN=Dctn3 PE=2 SV=2 - [DCTN3_MOUSE]                                             | 55.38 | 4  | 12 | 12 | 43  | 0.924 | 1.229 | 0.932 | 1.040 | 94.16   | 55.38 | 20 | 43  | 186  | 21.0  | 6.06  |
| P62918   | 60S ribosomal protein L8 OS=Mus musculus GN=Rpl8 PE=2 SV=2 - [RL8_MOUSE]                                          | 50.97 | 1  | 13 | 13 | 78  | 0.669 | 0.879 | 0.863 | 1.040 | 188.65  | 50.97 | 21 | 78  | 257  | 28.0  | 11.03 |
| Q8B0N4   | Fibronectin type III domain-containing protein 9 OS=Mus musculus GN=Fn3c9 PE=2 SV=1 - [FNDC9_MOUSE]               | 25.22 | 1  | 4  | 4  | 8   | 1.607 | 1.021 | 0.778 | 1.040 | 22.14   | 25.22 | 6  | 8   | 226  | 25.6  | 5.90  |
| Q8VH16   | Wiskott-Aldrich syndrome protein family member 3 OS=Mus musculus GN=Wasf3 PE=2 SV=1 - [WASF3_MOUSE]               | 37.72 | 1  | 10 | 13 | 83  | 1.411 | 1.016 | 1.267 | 1.040 | 247.63  | 37.72 | 22 | 83  | 501  | 55.2  | 6.37  |
| H3BK68   | tRNA (guanine(26)-N(2))-dimethyltransferase (Fragment) OS=Mus musculus GN=Trmt1 PE=2 SV=1 - [H3BK68_MOUSE]        | 25.34 | 10 | 3  | 4  | 4   | 1.204 | 0.917 | 0.908 | 1.041 | 11.83   | 25.34 | 4  | 4   | 221  | 24.1  | 5.66  |
| Q8B87-2  | Isoform 2 of Ubiquitin carboxyl-terminal hydrolase 47 OS=Mus musculus GN=Usp47 - [UBP47_MOUSE]                    | 20.94 | 2  | 24 | 24 | 61  | 0.919 | 1.090 | 0.954 | 1.041 | 178.63  | 20.94 | 41 | 61  | 1356 | 154.7 | 5.08  |
| Q3TDN2-2 | Isoform 2 of FAS-associated factor 2 OS=Mus musculus GN=Fa2 - [FAF2_MOUSE]                                        | 33.33 | 5  | 10 | 10 | 44  | 0.769 | 0.690 | 0.872 | 1.041 | 133.88  | 33.33 | 18 | 44  | 426  | 50.2  | 5.27  |
| E9Q421   | GPI-anchor transamidase OS=Mus musculus GN=Pigk PE=2 SV=1 - [E9Q421_MOUSE]                                        | 9.12  | 4  | 4  | 4  | 9   | 0.713 | 0.915 | 0.859 | 1.041 | 21.20   | 9.12  | 6  | 9   | 362  | 40.8  | 5.80  |
| Q6ZQ73   | Cullin-associated NEDD8-dissociated protein 2 OS=Mus musculus GN=Cand2 PE=1 SV=2 - [CAND2_MOUSE]                  | 5.10  | 1  | 4  | 6  | 13  | 0.863 | 1.113 | 0.817 | 1.041 | 37.50   | 5.10  | 10 | 13  | 1235 | 135.5 | 5.58  |

|          |                                                                                                                             |       |   |    |    |     |       |       |       |       |        |       |    |     |      |       |      |
|----------|-----------------------------------------------------------------------------------------------------------------------------|-------|---|----|----|-----|-------|-------|-------|-------|--------|-------|----|-----|------|-------|------|
| Q8JZV7   | Putative N-acetylglucosamine-6-phosphate deacetylase<br>OS=Mus musculus<br>GN=Amhd2 PE=2 SV=1 - [MARR_MOUSE]                | 38.39 | 2 | 10 | 10 | 32  | 1.614 | 1.141 | 0.960 | 1.041 | 98.77  | 38.39 | 16 | 32  | 409  | 43.5  | 6.23 |
| Q9R1S8   | Calpain-7 OS=Mus musculus<br>GN=Capn7 PE=2 SV=1 - [CAN7_MOUSE]                                                              | 4.43  | 2 | 3  | 3  | 12  | 2.462 | 1.049 | 1.009 | 1.041 | 20.95  | 4.43  | 6  | 12  | 813  | 92.5  | 7.97 |
| Q99MJ9   | ATP-dependent RNA helicase DDX50 OS=Mus musculus<br>GN=Ddx50 PE=2 SV=1 - [DDX50_MOUSE]                                      | 7.49  | 1 | 3  | 5  | 7   | 0.537 | 0.793 | 0.965 | 1.041 | 13.33  | 7.49  | 7  | 7   | 734  | 82.1  | 9.25 |
| P97445   | Voltage-dependent P/Q-type calcium channel subunit alpha-1A OS=Mus musculus<br>GN=Cacna1a PE=1 SV=2 - [CACNA1A_MOUSE]       | 18.54 | 2 | 28 | 33 | 103 | 0.608 | 0.863 | 1.276 | 1.041 | 303.72 | 18.54 | 51 | 103 | 2368 | 267.5 | 8.85 |
| F8WIA8   | MAGE-like protein 2 OS=Mus musculus<br>GN=Magel2 PE=2 SV=1 - [F8WIA8_MOUSE]                                                 | 1.95  | 2 | 2  | 2  | 2   | 1.056 | 0.861 | 0.613 | 1.041 | 6.45   | 1.95  | 2  | 2   | 1284 | 137.9 | 7.47 |
| P30873   | Somatostatin receptor type 1 OS=Mus musculus<br>GN=Sotr1 PE=2 SV=1 - [SSR1_MOUSE]                                           | 4.86  | 1 | 1  | 1  | 1   | 0.606 | 1.252 | 1.357 | 1.041 | 4.54   | 4.86  | 1  | 1   | 391  | 42.7  | 8.28 |
| P50153   | Guanine nucleotide-binding protein G(1)/G(S)/G(O) subunit gamma-4 OS=Mus musculus<br>GN=Gng4 PE=2 SV=1 - [GNG4_MOUSE]       | 88.00 | 1 | 7  | 8  | 187 | 0.996 | 1.222 | 1.069 | 1.041 | 540.26 | 88.00 | 14 | 187 | 75   | 8.4   | 7.08 |
| Q8BXZ1   | Protein disulfide-isomerase TMX3 OS=Mus musculus<br>GN=Tmx3 PE=1 SV=2 - [TMX3_MOUSE]                                        | 31.14 | 1 | 13 | 14 | 41  | 0.779 | 1.024 | 0.846 | 1.041 | 121.25 | 31.14 | 23 | 41  | 456  | 51.8  | 5.16 |
| Q9WVK8   | Cholesterol 24-hydroxylase OS=Mus musculus<br>GN=Cyp46a1 PE=2 SV=1 - [CP46A_MOUSE]                                          | 43.20 | 1 | 22 | 22 | 75  | 0.612 | 1.497 | 1.180 | 1.041 | 198.00 | 43.20 | 36 | 75  | 500  | 56.8  | 8.82 |
| Q9CQU8   | Mitochondrial inner membrane protease subunit 1 OS=Mus musculus<br>GN=Immp11 PE=2 SV=1 - [IMMP11_MOUSE]                     | 11.45 | 1 | 1  | 2  | 4   | 0.460 | 0.633 | 0.993 | 1.041 | 9.75   | 11.45 | 3  | 4   | 166  | 18.5  | 8.16 |
| Q9D9H8   | UPF0565 protein Czorf69 homolog OS=Mus musculus<br>PE=2 SV=3 - [CB069_MOUSE]                                                | 9.32  | 1 | 3  | 3  | 9   | 0.890 | 1.063 | 1.023 | 1.041 | 33.51  | 9.32  | 6  | 9   | 365  | 41.7  | 7.87 |
| E9QNX9   | Tyrosine-protein kinase receptor OS=Mus musculus<br>GN=Igf1r PE=2 SV=1 - [E9QNX9_MOUSE]                                     | 9.13  | 2 | 8  | 9  | 19  | 1.138 | 1.434 | 1.133 | 1.041 | 34.64  | 9.13  | 12 | 19  | 1369 | 155.2 | 5.83 |
| O08908   | Phosphatidylinositol 3-kinase regulatory subunit beta OS=Mus musculus<br>GN=PIK3r2 PE=1 SV=2 - [P85B_MOUSE]                 | 22.71 | 3 | 10 | 13 | 32  | 0.916 | 1.067 | 1.228 | 1.041 | 82.54  | 22.71 | 20 | 32  | 722  | 81.2  | 6.07 |
| Q91VV4-2 | Isoform 2 of DENN domain containing protein 2D OS=Mus musculus<br>GN=Dennd2d - [DEN2D_MOUSE]                                | 8.80  | 2 | 2  | 2  | 2   | 1.607 | 1.659 | 1.292 | 1.041 | 0.00   | 8.80  | 2  | 2   | 466  | 52.9  | 7.97 |
| Q80XP9-2 | Isoform 2 of Serine/threonine-protein kinase WNK3 OS=Mus musculus<br>GN=Wnk3 - [WNK3_MOUSE]                                 | 20.18 | 3 | 18 | 25 | 96  | 1.051 | 0.867 | 1.047 | 1.042 | 272.05 | 20.18 | 41 | 96  | 1710 | 188.3 | 5.62 |
| B2RUJ5   | Amyloid beta A4 precursor protein-binding family A member 1 OS=Mus musculus<br>GN=Apba1 PE=2 SV=2 - [APBA1_MOUSE]           | 26.37 | 2 | 13 | 16 | 117 | 1.494 | 0.948 | 1.190 | 1.042 | 307.80 | 26.37 | 30 | 117 | 842  | 92.9  | 4.88 |
| Q9CQA3   | Succinate dehydrogenase [ubiquinone] iron-sulfur subunit, mitochondrial OS=Mus musculus<br>GN=Sdhb PE=1 SV=1 - [DHSB_MOUSE] | 50.35 | 2 | 17 | 17 | 102 | 1.254 | 0.876 | 0.869 | 1.042 | 269.90 | 50.35 | 28 | 102 | 282  | 31.8  | 8.68 |
| Q9QUK9   | MCG15083 OS=Mus musculus<br>GN=Try5 PE=2 SV=1 - [Q9QUK9_MOUSE]                                                              | 12.20 | 3 | 1  | 2  | 114 | 2.005 | 1.064 | 1.072 | 1.042 | 248.17 | 12.20 | 4  | 114 | 246  | 26.3  | 5.30 |
| Q9JF3    | Bifunctional lysine-specific demethylase and histidinohydroxylase NO66 OS=Mus musculus<br>GN=No66 PE=1 SV=2 - [NO66_MOUSE]  | 10.28 | 1 | 6  | 8  | 11  | 0.908 | 1.489 | 1.120 | 1.042 | 20.20  | 10.28 | 10 | 11  | 603  | 67.5  | 8.66 |
| P59528   | Taste receptor type 2 member 123 OS=Mus musculus<br>GN=Tas2r123 PE=2 SV=2 - [TAS2R123_MOUSE]                                | 3.30  | 1 | 1  | 1  | 1   | 1.296 | 2.155 | 1.431 | 1.042 | 1.92   | 3.30  | 1  | 1   | 333  | 38.0  | 9.64 |
| Q7TPD1-2 | Isoform 2 of F-box only protein 11 OS=Mus musculus<br>GN=Fbxo11 - [FBX11_MOUSE]                                             | 2.61  | 4 | 2  | 2  | 4   | 1.446 | 0.825 | 1.188 | 1.042 | 9.12   | 2.61  | 3  | 4   | 842  | 94.0  | 6.90 |
| Q9D2N9   | Vacuolar protein sorting-associated protein 33A OS=Mus musculus<br>GN=Vps33a PE=1 SV=2 - [VP33A_MOUSE]                      | 39.30 | 1 | 19 | 19 | 59  | 0.613 | 0.857 | 0.843 | 1.042 | 170.90 | 39.30 | 35 | 59  | 598  | 67.5  | 7.08 |
| P59672   | Ankyrin repeat and SAM domain-containing protein 1A OS=Mus musculus<br>GN=Ank1a PE=1 SV=3 - [ANS1A_MOUSE]                   | 10.52 | 3 | 10 | 12 | 25  | 1.181 | 0.943 | 0.983 | 1.042 | 68.26  | 10.52 | 18 | 25  | 1150 | 125.2 | 6.05 |



|          |                                                                                                                             |       |    |    |    |     |       |       |       |       |        |       |    |     |      |       |      |
|----------|-----------------------------------------------------------------------------------------------------------------------------|-------|----|----|----|-----|-------|-------|-------|-------|--------|-------|----|-----|------|-------|------|
| A2AJK6-3 | Isoform 3 of Chromodomain-helicase-DNA-binding protein 7 OS=Mus musculus GN=Cld7 -                                          | 1.96  | 3  | 2  | 6  | 10  | 0.798 | 1.281 | 1.006 | 1.042 | 25.44  | 1.96  | 9  | 10  | 2960 | 331.0 | 6.57 |
| Q14AI0   | (transcribed) Sister chromatid cohesion protein DCC1 OS=Mus musculus GN=DSCC1 PE=2 SV=1 - [DCC1_MOUSE]                      | 6.02  | 2  | 1  | 1  | 1   | 0.704 | 1.136 | 1.033 | 1.042 | 0.00   | 6.02  | 1  | 1   | 399  | 45.5  | 4.91 |
| E9PYQ9   | Solute carrier family 15 member 2 OS=Mus musculus GN=Slc15a2 PE=2 SV=1 -                                                    | 8.04  | 6  | 4  | 4  | 10  | 1.173 | 1.108 | 1.037 | 1.042 | 27.74  | 8.04  | 7  | 10  | 709  | 79.6  | 6.79 |
| D3Z074   | Protein diaphanous homolog 1 OS=Mus musculus GN=Diap1 PE=2 SV=2 - [D3Z074_MOUSE]                                            | 22.95 | 5  | 22 | 22 | 47  | 0.778 | 1.260 | 1.026 | 1.042 | 132.05 | 22.95 | 33 | 47  | 1220 | 135.7 | 5.34 |
| Q9CRB0   | Sorting nexin-24 OS=Mus musculus GN=Snx24 PE=2 SV=1 - [SNX24_MOUSE]                                                         | 9.47  | 1  | 2  | 2  | 3   | 0.547 | 0.696 | 0.910 | 1.042 | 9.09   | 9.47  | 3  | 3   | 169  | 19.6  | 7.01 |
| Q921H8   | 3-ketoacyl-CoA thiolase A, peroxisomal OS=Mus musculus GN=Acaa1a PE=2 SV=1 - [THIKA_MOUSE]                                  | 58.25 | 6  | 10 | 19 | 111 | 0.958 | 0.892 | 0.817 | 1.042 | 355.23 | 58.25 | 30 | 111 | 424  | 43.9  | 8.44 |
| B7ZC21   | cAMP-dependent protein kinase inhibitor gamma (Fragment) OS=Mus musculus GN=Pki3 PE=2 SV=1 - [B7ZC21_MOUSE]                 | 30.36 | 3  | 2  | 2  | 6   | 1.946 | 1.634 | 2.010 | 1.042 | 20.71  | 30.36 | 4  | 6   | 56   | 5.9   | 4.28 |
| P48377   | MHC class II regulatory factor RFX1 OS=Mus musculus GN=Rfx1 PE=2 SV=2 - [RFX1_MOUSE]                                        | 6.54  | 1  | 4  | 4  | 11  | 2.407 | 1.705 | 1.188 | 1.042 | 32.31  | 6.54  | 6  | 11  | 963  | 103.6 | 6.34 |
| P59158   | Solute carrier family 12 member 3 OS=Mus musculus GN=Slc12a3 PE=1 SV=1 -                                                    | 1.40  | 1  | 1  | 1  | 1   | 1.523 | 1.325 | 0.900 | 1.042 | 2.55   | 1.40  | 1  | 1   | 1002 | 110.6 | 7.56 |
| Q9WUH2-2 | Isoform 2 of LIM/homeobox protein Lhx9 OS=Mus musculus GN=Lhx9 -                                                            | 4.98  | 2  | 1  | 1  | 1   | 0.555 | 1.100 | 0.880 | 1.042 | 0.00   | 4.98  | 1  | 1   | 321  | 36.1  | 9.01 |
| Q6QI06   | Rapamycin-insensitive companion of mTOR OS=Mus musculus GN=Rictor PE=1 SV=2 - [RICTR_MOUSE]                                 | 10.54 | 2  | 12 | 12 | 23  | 0.959 | 1.045 | 0.920 | 1.042 | 60.26  | 10.54 | 20 | 23  | 1708 | 191.4 | 7.23 |
| Q8K0D0-2 | Isoform 2 of Cyclin-dependent kinase 17 OS=Mus musculus GN=Cdk17 -                                                          | 37.44 | 18 | 7  | 15 | 65  | 1.329 | 1.298 | 1.224 | 1.042 | 162.42 | 37.44 | 25 | 65  | 430  | 48.9  | 8.06 |
| F6ZBR8   | Protein Wiz (Fragment) OS=Mus musculus GN=Wiz PE=4 SV=1 - [F6ZBR8_MOUSE]                                                    | 3.80  | 4  | 4  | 4  | 6   | 1.424 | 0.954 | 1.019 | 1.043 | 9.57   | 3.80  | 6  | 6   | 973  | 104.5 | 9.41 |
| P00375   | Dihydrofolate reductase OS=Mus musculus GN=Dhfr PE=1 SV=3 - [DYR_MOUSE]                                                     | 12.30 | 1  | 1  | 2  | 6   | 0.765 | 1.261 | 0.899 | 1.043 | 11.16  | 12.30 | 4  | 6   | 187  | 21.6  | 8.53 |
| Q3UUF8   | Ankyrin repeat domain-containing protein 34B OS=Mus musculus GN=Ankrd34b PE=1 SV=1 - [AN34B_MOUSE]                          | 28.74 | 1  | 12 | 12 | 33  | 0.847 | 0.544 | 1.035 | 1.043 | 92.60  | 28.74 | 19 | 33  | 508  | 55.4  | 8.02 |
| Q62311   | Transcription initiation factor TFIIID subunit 6 OS=Mus musculus GN=Taf6 PE=2 SV=1 - [TAF6_MOUSE]                           | 5.75  | 3  | 4  | 4  | 11  | 1.675 | 1.290 | 1.558 | 1.043 | 23.75  | 5.75  | 6  | 11  | 678  | 72.6  | 8.60 |
| Q3TPX4   | Exocyst complex component 5 OS=Mus musculus GN=Exoc5 PE=1 SV=2 - [EXOCS_MOUSE]                                              | 37.29 | 3  | 25 | 25 | 73  | 0.697 | 1.404 | 1.073 | 1.043 | 220.72 | 37.29 | 42 | 73  | 708  | 81.7  | 6.71 |
| Q78Y63-2 | Isoform 2 of Phosducin-like protein 2 OS=Mus musculus GN=Pdcl2 - [PDCL2_MOUSE]                                              | 16.67 | 2  | 2  | 2  | 3   | 1.247 | 1.341 | 1.350 | 1.043 | 5.66   | 16.67 | 2  | 3   | 192  | 22.0  | 5.24 |
| Q8C605   | 6-phosphofructokinase OS=Mus musculus GN=Pfkfb3 PE=2 SV=1 - [Q8C605_MOUSE]                                                  | 54.46 | 5  | 32 | 36 | 289 | 1.560 | 1.110 | 0.984 | 1.043 | 927.18 | 54.46 | 65 | 289 | 784  | 85.5  | 6.89 |
| A2BDX3   | Adenylyltransferase and sulfurtransferase MOCS3 OS=Mus musculus GN=Mocs3 PE=2 SV=1 - [MOCS3_MOUSE]                          | 27.61 | 1  | 10 | 11 | 28  | 0.871 | 0.970 | 0.949 | 1.043 | 98.56  | 27.61 | 17 | 28  | 460  | 49.3  | 7.49 |
| Q8K304-2 | Isoform 2 of Transmembrane protein 129 OS=Mus musculus GN=Tmem129 -                                                         | 15.46 | 2  | 3  | 3  | 5   | 0.793 | 0.907 | 0.889 | 1.043 | 14.97  | 15.46 | 5  | 5   | 291  | 32.7  | 7.66 |
| G5E850   | Cytochrome b-5, isoform CRA_a OS=Mus musculus GN=Cybb PE=3 SV=1 - [G5E850_MOUSE]                                            | 40.82 | 3  | 4  | 4  | 42  | 1.151 | 0.995 | 0.871 | 1.043 | 132.62 | 40.82 | 7  | 42  | 98   | 11.1  | 5.30 |
| Q2WF71   | Leucine-rich repeat and fibronectin type III domain containing protein 1 OS=Mus musculus GN=Lrrn1 PE=1 SV=1 - [LRRN1_MOUSE] | 15.67 | 3  | 7  | 9  | 19  | 0.562 | 0.944 | 0.933 | 1.043 | 71.34  | 15.67 | 15 | 19  | 766  | 81.9  | 7.59 |
| Q80U12   | Small G protein signaling modulator 2 OS=Mus musculus GN=Sgsm2 PE=2 SV=2 -                                                  | 11.84 | 3  | 6  | 8  | 26  | 2.622 | 1.345 | 0.868 | 1.043 | 61.25  | 11.84 | 13 | 26  | 1005 | 113.0 | 6.60 |
| B1AXV0   | DOMON domain-containing protein FRS1L OS=Mus musculus GN=Frsl1 PE=1 SV=1 - [FRS1L_MOUSE]                                    | 23.21 | 2  | 5  | 5  | 15  | 0.420 | 1.320 | 1.237 | 1.043 | 41.90  | 23.21 | 9  | 15  | 293  | 32.5  | 5.43 |

|          |                                                                                                                              |       |   |     |     |     |       |       |       |       |         |       |     |     |      |       |      |
|----------|------------------------------------------------------------------------------------------------------------------------------|-------|---|-----|-----|-----|-------|-------|-------|-------|---------|-------|-----|-----|------|-------|------|
| Q8C96    | Ras association domain-containing protein 8<br>OS=Mus musculus<br>GN=Rassf8 PE=1 SV=1 - [RASf8_MOUSE]                        | 10.02 | 1 | 4   | 4   | 6   | 2.128 | 0.994 | 1.021 | 1.043 | 14.71   | 10.02 | 6   | 6   | 419  | 48.1  | 5.95 |
| Q9CZ8    | Elongation factor Ts, mitochondrial OS=Mus musculus<br>GN=Tsfm PE=2 SV=1 - [EFTS_MOUSE]                                      | 43.52 | 3 | 10  | 10  | 48  | 1.111 | 1.203 | 0.958 | 1.043 | 167.82  | 43.52 | 19  | 48  | 324  | 35.3  | 7.06 |
| P40630-2 | Isoform Nuclear of Transcription factor A, mitochondrial OS=Mus musculus<br>GN=Tfam - [TFAM_MOUSE]                           | 33.02 | 3 | 8   | 8   | 25  | 1.091 | 0.819 | 1.252 | 1.044 | 59.04   | 33.02 | 13  | 25  | 215  | 25.0  | 9.66 |
| Q9JID9   | SH2B adapter protein 2 OS=Mus musculus<br>GN=Sh2b2 PE=1 SV=2 - [SH2B2_MOUSE]                                                 | 2.58  | 1 | 1   | 1   | 1   | 4.784 | 1.707 | 1.038 | 1.044 | 4.01    | 2.58  | 1   | 1   | 621  | 66.5  | 6.35 |
| A2A864   | Integrin beta OS=Mus musculus<br>GN=Itgb4 PE=3 SV=1 - [A2A864_MOUSE]                                                         | 1.66  | 4 | 3   | 3   | 4   | 3.661 | 0.751 | 0.729 | 1.044 | 7.28    | 1.66  | 4   | 4   | 1802 | 199.7 | 6.02 |
| P21836   | Acetylcholinesterase OS=Mus musculus<br>GN=Ache PE=1 SV=1 - [ACES_MOUSE]                                                     | 18.73 | 1 | 8   | 8   | 26  | 1.443 | 0.715 | 1.276 | 1.044 | 80.87   | 18.73 | 14  | 26  | 614  | 68.1  | 6.33 |
| Q2PFD7-5 | Isoform 5 of PH and SEC7 domain-containing protein 3 OS=Mus musculus<br>GN=Psd3 - [PSD3_MOUSE]                               | 37.55 | 6 | 15  | 31  | 165 | 1.063 | 0.945 | 1.326 | 1.044 | 437.55  | 37.55 | 54  | 165 | 1004 | 111.1 | 6.25 |
| O88737   | Protein bassoon OS=Mus musculus<br>GN=Bsn PE=1 SV=4 - [BSN_MOUSE]                                                            | 45.38 | 2 | 120 | 122 | 887 | 0.941 | 1.104 | 2.137 | 1.044 | 2704.82 | 45.38 | 221 | 887 | 3942 | 418.6 | 7.71 |
| Q8VHJ5   | Serine/threonine-protein kinase MARK1 OS=Mus musculus<br>GN=Mark1 PE=1 SV=2 - [MARK1_MOUSE]                                  | 43.40 | 1 | 25  | 36  | 152 | 0.782 | 0.815 | 1.124 | 1.044 | 427.05  | 43.40 | 59  | 152 | 795  | 88.3  | 9.39 |
| F8VQF9   | Trafficking protein particle complex subunit 10 OS=Mus musculus<br>GN=Trappc10 PE=4 SV=1 - [F8VQF9_MOUSE]                    | 19.79 | 2 | 20  | 20  | 42  | 0.802 | 1.095 | 0.998 | 1.044 | 118.21  | 19.79 | 31  | 42  | 1258 | 141.4 | 5.92 |
| H3BLL3   | Leucine-rich repeat and calponin homology domain-containing protein 4 OS=Mus musculus<br>GN=Lctc4 PE=2 SV=1 - [H3BLL3_MOUSE] | 16.80 | 6 | 6   | 6   | 9   | 1.413 | 1.478 | 0.798 | 1.044 | 19.24   | 16.80 | 8   | 9   | 649  | 69.9  | 6.89 |
| O88958   | Glucosamine-6-phosphate isomerase 1 OS=Mus musculus<br>GN=Gnpda1 PE=2 SV=3 - [GNP11_MOUSE]                                   | 39.45 | 2 | 7   | 10  | 54  | 1.492 | 1.069 | 0.800 | 1.044 | 163.36  | 39.45 | 19  | 54  | 289  | 32.5  | 6.60 |
| P51569   | Alpha-galactosidase A OS=Mus musculus<br>GN=Gla PE=1 SV=1 - [AGAL_MOUSE]                                                     | 4.30  | 2 | 2   | 2   | 4   | 0.747 | 1.036 | 0.969 | 1.044 | 12.81   | 4.30  | 3   | 4   | 419  | 47.6  | 5.72 |
| P0C0A3   | Charged multivesicular body protein 6 OS=Mus musculus<br>GN=Chmp6 PE=2 SV=2 - [Q7TRG4_MOUSE]                                 | 19.50 | 2 | 4   | 6   | 26  | 0.872 | 0.733 | 1.133 | 1.044 | 69.80   | 19.50 | 11  | 26  | 200  | 23.4  | 5.44 |
| Q7TRG4   | Olfactory receptor 843 OS=Mus musculus<br>GN=Olfr843 PE=2 SV=1 - [Q7TRG4_MOUSE]                                              | 2.88  | 1 | 1   | 1   | 1   | 1.937 | 1.601 | 1.312 | 1.044 | 2.79    | 2.88  | 1   | 1   | 313  | 35.1  | 7.84 |
| Q5DU28   | Pecanex-like protein 2 OS=Mus musculus<br>GN=Pcnx2 PE=2 SV=2 - [PCX2_MOUSE]                                                  | 2.36  | 6 | 3   | 3   | 3   | 3.374 | 1.112 | 1.202 | 1.045 | 6.50    | 2.36  | 3   | 3   | 2122 | 234.0 | 6.95 |
| Q91Z31   | Polypyrimidine tract-binding protein 2 OS=Mus musculus<br>GN=Ptbp2 PE=1 SV=2 - [PTBP2_MOUSE]                                 | 46.33 | 3 | 13  | 15  | 54  | 0.684 | 1.032 | 0.924 | 1.045 | 152.18  | 46.33 | 21  | 54  | 531  | 57.5  | 8.66 |
| Q5SYL3   | UPF0378 protein KIAA0100 OS=Mus musculus<br>GN=Kiaa0100 PE=2 SV=1 - [Q8VCS3_MOUSE]                                           | 4.97  | 1 | 9   | 9   | 20  | 0.794 | 0.712 | 0.984 | 1.045 | 54.50   | 4.97  | 17  | 20  | 2234 | 254.3 | 7.34 |
| Q8VCS3   | Glycosaminoglycan xylosylkinase OS=Mus musculus<br>GN=Fam20b PE=2 SV=1 - [Q8VCS3_MOUSE]                                      | 14.67 | 1 | 5   | 5   | 13  | 1.212 | 1.027 | 0.740 | 1.045 | 38.67   | 14.67 | 9   | 13  | 409  | 46.6  | 6.95 |
| P61793-2 | Isoform 2 of Lysophosphatidic acid receptor 1 OS=Mus musculus<br>GN=Lpar1 - [Q8BG15_MOUSE]                                   | 8.67  | 2 | 2   | 2   | 5   | 1.353 | 0.661 | 1.350 | 1.045 | 14.31   | 8.67  | 3   | 5   | 346  | 39.3  | 8.53 |
| Q8BG15-2 | Isoform 2 of Peroxisome assembly protein 26 OS=Mus musculus<br>GN=Pex26 - [E9PVP1_MOUSE]                                     | 11.51 | 4 | 4   | 4   | 10  | 0.621 | 0.946 | 0.868 | 1.045 | 23.60   | 11.51 | 7   | 10  | 304  | 33.9  | 6.80 |
| E9PVP1   | Aurora kinase B OS=Mus musculus<br>GN=Aim1 PE=2 SV=1 - [E9PVP1_MOUSE]                                                        | 1.24  | 1 | 2   | 3   | 3   | 1.506 | 0.810 | 1.003 | 1.045 | 6.14    | 1.24  | 3   | 3   | 1691 | 184.6 | 6.01 |
| Q76LS9-2 | Isoform 2 of Protein FAM63A OS=Mus musculus<br>GN=Fam63a - [F63A_MOUSE]                                                      | 17.86 | 3 | 5   | 6   | 14  | 0.826 | 0.680 | 0.978 | 1.045 | 40.68   | 17.86 | 11  | 14  | 459  | 50.2  | 4.74 |
| Q6ZPQ6-2 | Isoform 2 of Membrane-associated phosphatidylinositol transfer protein 2 OS=Mus musculus<br>GN=Plgpm2 - [MCG117379_MOUSE]    | 18.11 | 4 | 23  | 24  | 64  | 0.581 | 1.913 | 1.687 | 1.045 | 146.61  | 18.11 | 40  | 64  | 1281 | 142.2 | 7.71 |
| Q99PA7   | MCG117379 OS=Mus musculus<br>GN=4930550L24Rik PE=2 SV=1 - [Q99PA7_MOUSE]                                                     | 7.50  | 1 | 1   | 1   | 1   | 0.835 | 0.842 | 1.713 | 1.045 | 3.09    | 7.50  | 1   | 1   | 320  | 35.0  | 5.14 |

|          |                                                                                                                                  |       |   |    |    |     |       |       |       |       |        |       |    |     |      |       |      |
|----------|----------------------------------------------------------------------------------------------------------------------------------|-------|---|----|----|-----|-------|-------|-------|-------|--------|-------|----|-----|------|-------|------|
| P63046   | Sulfotransferase 4A1<br>OS=Mus musculus<br>GN=Sulf4a1 PE=2 SV=1 -<br>[ST4A1_MOUSE]                                               | 34.86 | 2 | 10 | 10 | 44  | 0.806 | 0.754 | 0.893 | 1.045 | 99.08  | 34.86 | 19 | 44  | 284  | 33.0  | 5.53 |
| Q8R323   | Replication factor C<br>subunit 3 OS=Mus<br>musculus GN=Rfc3 PE=2<br>SV=1 - [RFC3_MOUSE]                                         | 3.93  | 1 | 1  | 1  | 2   | 0.584 | 1.025 | 0.960 | 1.045 | 10.49  | 3.93  | 2  | 2   | 356  | 40.5  | 8.38 |
| P97868-2 | Isoform 2 of E3 ubiquitin-<br>protein ligase RBBP6<br>OS=Mus musculus<br>GN=Rbbp6 -                                              | 6.15  | 4 | 11 | 11 | 18  | 2.799 | 1.201 | 1.238 | 1.045 | 39.41  | 6.15  | 16 | 18  | 1756 | 195.2 | 9.61 |
| Q3THK7   | GMP synthase [glutamine-<br>hydrolyzing] OS=Mus<br>musculus GN=Gmps PE=1<br>SV=2 - [GUAA_MOUSE]                                  | 56.28 | 1 | 33 | 33 | 131 | 0.714 | 0.988 | 0.924 | 1.045 | 424.85 | 56.28 | 58 | 131 | 693  | 76.7  | 6.73 |
| Q9D1Q4   | Dolichol-phosphate<br>mannosyltransferase<br>subunit 3 OS=Mus<br>musculus GN=Dpm3 PE=3<br>SV=1 - [DPM3_MOUSE]                    | 23.91 | 1 | 2  | 2  | 8   | 1.063 | 0.805 | 0.863 | 1.046 | 21.21  | 23.91 | 4  | 8   | 92   | 10.1  | 7.08 |
| Q8K2V6   | Importin-11 OS=Mus<br>musculus GN=Ipo11 PE=1<br>SV=1 - [IPO11_MOUSE]                                                             | 8.31  | 2 | 6  | 6  | 11  | 0.900 | 1.168 | 0.976 | 1.046 | 32.26  | 8.31  | 9  | 11  | 975  | 112.3 | 5.26 |
| A2A9C3-2 | Isoform 2 of Protein SZT2<br>OS=Mus musculus<br>GN=Szt2 - [SZT2_MOUSE]                                                           | 3.15  | 2 | 7  | 7  | 11  | 1.955 | 1.181 | 1.133 | 1.046 | 23.71  | 3.15  | 10 | 11  | 3430 | 377.3 | 6.19 |
| P80316   | T-complex protein 1<br>subunit epsilon OS=Mus<br>musculus GN=Cct5 PE=1<br>SV=1 - [TCPE_MOUSE]                                    | 61.92 | 2 | 33 | 34 | 230 | 0.827 | 1.114 | 0.941 | 1.046 | 682.63 | 61.92 | 64 | 230 | 541  | 59.6  | 6.02 |
| Q9D5T0   | ATPase family AAA domain-<br>containing protein 1<br>OS=Mus musculus<br>GN=Atad1 PE=1 SV=1 -<br>[ATAD1_MOUSE]                    | 34.90 | 1 | 12 | 12 | 37  | 0.813 | 0.826 | 0.962 | 1.046 | 107.37 | 34.90 | 20 | 37  | 361  | 40.7  | 6.90 |
| O55022   | Membrane-associated<br>progesterone receptor<br>component 1 OS=Mus<br>musculus GN=Pgrmc1<br>PE=1 SV=4 -<br>[PGRMC1_MOUSE]        | 44.62 | 1 | 8  | 10 | 115 | 0.750 | 1.696 | 0.832 | 1.046 | 346.91 | 44.62 | 17 | 115 | 195  | 21.7  | 4.70 |
| Q6PR54-2 | Isoform 2 of Telomere-<br>associated protein RIF1<br>OS=Mus musculus<br>GN=Rif1 - [RIF1_MOUSE]                                   | 1.67  | 3 | 3  | 3  | 3   | 5.713 | 1.432 | 1.326 | 1.046 | 7.97   | 1.67  | 3  | 3   | 2393 | 263.3 | 5.48 |
| F7AX87   | Low-density lipoprotein<br>receptor-related protein 11<br>(Fragment) OS=Mus<br>musculus GN=Lrp11 PE=2<br>SV=1 - [F7AX87_MOUSE]   | 25.31 | 4 | 4  | 5  | 15  | 0.911 | 0.953 | 0.902 | 1.046 | 35.83  | 25.31 | 7  | 15  | 245  | 26.3  | 8.98 |
| Q7TMW6   | Cytosolic Fe-S cluster<br>assembly factor NARFL<br>OS=Mus musculus<br>GN=Narf1 PE=2 SV=2 -<br>[NARFL_MOUSE]                      | 30.25 | 4 | 9  | 9  | 22  | 0.812 | 0.980 | 0.992 | 1.046 | 71.19  | 30.25 | 14 | 22  | 476  | 53.1  | 6.48 |
| Q9JJY4   | Probable ATP-dependent<br>RNA helicase DDX20<br>OS=Mus musculus<br>GN=Ddx20 PE=1 SV=2 -<br>[DDX20_MOUSE]                         | 10.79 | 1 | 6  | 6  | 13  | 0.684 | 0.850 | 1.212 | 1.046 | 26.75  | 10.79 | 11 | 13  | 825  | 91.7  | 6.74 |
| A2RSQ0   | DENN domain-containing<br>protein 5B OS=Mus<br>musculus GN=Dennd5b<br>PE=1 SV=2 -                                                | 8.32  | 1 | 6  | 10 | 34  | 0.907 | 0.839 | 0.910 | 1.047 | 84.30  | 8.32  | 19 | 34  | 1274 | 144.5 | 6.68 |
| A2A9T0-2 | Isoform 2 of TANK-binding<br>kinase 1-binding protein 1<br>OS=Mus musculus<br>GN=Tbkbp1 -<br>[TBKB1_MOUSE]                       | 7.55  | 7 | 4  | 5  | 12  | 0.726 | 1.425 | 0.829 | 1.047 | 29.55  | 7.55  | 7  | 12  | 596  | 65.4  | 5.62 |
| Q8BJ03-2 | Isoform 2 of Cytochrome c<br>oxidase assembly protein<br>COX15 homolog OS=Mus<br>musculus GN=Cox15 -<br>[COX15_MOUSE]            | 15.40 | 2 | 5  | 5  | 10  | 1.207 | 1.222 | 0.973 | 1.047 | 17.62  | 15.40 | 8  | 10  | 396  | 44.0  | 9.70 |
| Q80VES   | Protein Tbc1d22b OS=Mus<br>musculus GN=Tbc1d22b<br>PE=2 SV=1 -<br>[Q80VES_MOUSE]                                                 | 24.75 | 1 | 9  | 10 | 22  | 0.769 | 0.585 | 0.862 | 1.047 | 65.44  | 24.75 | 16 | 22  | 505  | 59.1  | 7.43 |
| E9Q9A9   | 2'-5'-oligoadenylate<br>synthase 2 OS=Mus<br>musculus GN=Oas2 PE=2<br>SV=1 - [OAS2_MOUSE]                                        | 2.29  | 2 | 1  | 1  | 1   | 1.463 | 0.726 | 0.690 | 1.047 | 0.00   | 2.29  | 1  | 1   | 742  | 85.0  | 6.79 |
| F6VFS9   | Guanylate cyclase OS=Mus<br>musculus GN=Gucy2d<br>PE=2 SV=1 -<br>[F6VFS9_MOUSE]                                                  | 1.70  | 1 | 1  | 1  | 1   | 4.017 | 1.398 | 1.155 | 1.047 | 2.98   | 1.70  | 1  | 1   | 1116 | 122.3 | 6.60 |
| P70266-2 | Isoform 2 of 6-<br>phosphofructo-2-<br>kinase/fructose-2,6-<br>bisphosphatase 1 OS=Mus<br>musculus GN=Pfkfb1 -<br>[PFKFB1_MOUSE] | 4.69  | 2 | 1  | 2  | 6   | 1.103 | 0.397 | 0.671 | 1.047 | 11.56  | 4.69  | 3  | 6   | 448  | 52.1  | 6.38 |
| P09528   | Ferritin heavy chain<br>OS=Mus musculus<br>GN=Fth1 PE=1 SV=2 -<br>[FRIH_MOUSE]                                                   | 50.00 | 1 | 9  | 9  | 56  | 1.796 | 1.039 | 1.293 | 1.047 | 173.36 | 50.00 | 14 | 56  | 182  | 21.1  | 5.88 |
| Q8C650-2 | Isoform 2 of Septin-10<br>OS=Mus musculus<br>GN=Sept10 -<br>[SEPI0_MOUSE]                                                        | 18.27 | 3 | 3  | 7  | 56  | 1.959 | 0.938 | 0.791 | 1.047 | 103.23 | 18.27 | 12 | 56  | 427  | 49.8  | 6.71 |
| Q3UWE6   | MCG14935, isoform CRA_a<br>OS=Mus musculus<br>GN=Wdr20a PE=2 SV=1 -<br>[Q3UWE6_MOUSE]                                            | 23.73 | 2 | 10 | 11 | 36  | 1.464 | 0.968 | 1.075 | 1.047 | 86.31  | 23.73 | 16 | 36  | 569  | 62.8  | 8.00 |
| Q8VEB1   | G protein-coupled receptor<br>kinase 5 OS=Mus<br>musculus GN=Grk5 PE=1<br>SV=2 - [GRK5_MOUSE]                                    | 3.90  | 1 | 1  | 2  | 7   | 1.625 | 1.223 | 2.095 | 1.047 | 13.77  | 3.90  | 3  | 7   | 590  | 67.7  | 8.19 |

|          |                                                                                                                   |       |   |    |    |     |       |       |       |       |        |       |    |     |      |       |      |
|----------|-------------------------------------------------------------------------------------------------------------------|-------|---|----|----|-----|-------|-------|-------|-------|--------|-------|----|-----|------|-------|------|
| P97429   | Annexin A4 OS=Mus musculus GN=Anxa4 PE=2 SV=4 - [ANXA4_MOUSE]                                                     | 39.81 | 3 | 10 | 11 | 37  | 1.322 | 2.500 | 0.870 | 1.047 | 112.39 | 39.81 | 18 | 37  | 319  | 35.9  | 5.57 |
| Q9WTP2   | Protein sprouty homolog 4 OS=Mus musculus GN=Spry4 PE=2 SV=1 - [SPY4_MOUSE]                                       | 12.67 | 1 | 2  | 2  | 3   | 1.908 | 0.994 | 1.071 | 1.047 | 10.85  | 12.67 | 3  | 3   | 300  | 32.5  | 7.88 |
| Q9JMA1   | Ubiquitin carboxyl-terminal hydrolase 14 OS=Mus musculus GN=Usp14 PE=1 SV=3 - [UBP14_MOUSE]                       | 45.03 | 3 | 21 | 21 | 118 | 0.982 | 1.233 | 0.918 | 1.047 | 341.61 | 45.03 | 37 | 118 | 493  | 56.0  | 5.24 |
| E9Q3A5   | Protein Vmn2r105 OS=Mus musculus GN=Vmn2r105 PE=3 SV=1 - [E9Q3A5_MOUSE]                                           | 2.44  | 1 | 2  | 2  | 2   | 1.086 | 0.685 | 1.201 | 1.047 | 5.75   | 2.44  | 2  | 2   | 860  | 98.7  | 7.59 |
| O88587-2 | Isoform Soluble of Catechol O-methyltransferase OS=Mus musculus GN=Comt - [COMT_MOUSE]                            | 56.31 | 3 | 11 | 11 | 60  | 0.799 | 1.111 | 1.032 | 1.047 | 139.39 | 56.31 | 19 | 60  | 222  | 24.7  | 5.47 |
| Q81157   | Upstream-binding protein 1 OS=Mus musculus GN=Ubp1 PE=1 SV=1 - [UBP1_MOUSE]                                       | 19.63 | 2 | 7  | 8  | 21  | 1.008 | 1.109 | 1.094 | 1.047 | 64.45  | 19.63 | 14 | 21  | 540  | 60.2  | 6.27 |
| B1ATD5   | MCG9626, isoform CRA_b OS=Mus musculus GN=Mtmr3 PE=4 SV=1 - [B1ATD5_MOUSE]                                        | 12.17 | 8 | 11 | 12 | 28  | 1.299 | 1.327 | 1.071 | 1.047 | 77.23  | 12.17 | 17 | 28  | 1159 | 129.6 | 6.07 |
| D3Z2J6   | Thioredoxin-related transmembrane protein 2 OS=Mus musculus GN=Tmx2 PE=2 SV=1 - [D3Z2J6_MOUSE]                    | 28.02 | 3 | 7  | 7  | 24  | 0.686 | 0.636 | 0.849 | 1.047 | 71.56  | 28.02 | 12 | 24  | 257  | 29.6  | 8.72 |
| Q8BK64   | Activator of 90 kDa heat shock protein ATPase homolog 1 OS=Mus musculus GN=Ahsa1 PE=2 SV=2 - [AHS1_MOUSE]         | 65.98 | 1 | 18 | 19 | 179 | 0.972 | 0.900 | 0.902 | 1.047 | 551.68 | 65.98 | 32 | 179 | 338  | 38.1  | 5.53 |
| Q9CQA1   | Trafficking protein particle complex subunit 5 OS=Mus musculus GN=Trappc5 PE=1 SV=1 - [TPPC5_MOUSE]               | 28.19 | 1 | 6  | 6  | 24  | 0.554 | 0.972 | 0.856 | 1.047 | 66.95  | 28.19 | 12 | 24  | 188  | 20.8  | 9.66 |
| Q7TPG7   | Protein FAM19A2 OS=Mus musculus GN=Fam19a2 PE=2 SV=1 - [F19A2_MOUSE]                                              | 10.69 | 1 | 1  | 1  | 2   | 0.815 | 1.731 | 2.176 | 1.047 | 5.85   | 10.69 | 1  | 2   | 131  | 14.6  | 9.17 |
| Q76124   | Protein Mett7a2 OS=Mus musculus GN=Mett7a2 PE=2 SV=1 - [Q76124_MOUSE]                                             | 23.77 | 5 | 1  | 6  | 7   | 2.522 | 1.549 | 0.171 | 1.047 | 18.97  | 23.77 | 7  | 7   | 244  | 28.2  | 8.82 |
| A3KMP2   | Tetratricopeptide repeat protein 38 OS=Mus musculus GN=Ttc38 PE=2 SV=2 - [TTC38_MOUSE]                            | 19.57 | 3 | 7  | 7  | 22  | 1.328 | 1.195 | 0.661 | 1.048 | 73.85  | 19.57 | 13 | 22  | 465  | 52.2  | 6.30 |
| B2RW11   | Ankyrin repeat domain 34A OS=Mus musculus GN=Ankrd34a PE=2 SV=1 - [B2RW11_MOUSE]                                  | 38.99 | 1 | 14 | 14 | 65  | 0.966 | 0.986 | 1.500 | 1.048 | 231.52 | 38.99 | 26 | 65  | 495  | 52.4  | 9.45 |
| Q80U95   | Ubiquitin-protein ligase E3C OS=Mus musculus GN=Ube3c PE=2 SV=2 - [UBE3C_MOUSE]                                   | 24.19 | 1 | 19 | 21 | 57  | 0.662 | 0.865 | 0.918 | 1.048 | 167.91 | 24.19 | 35 | 57  | 1083 | 123.9 | 6.39 |
| Q6QWF9   | Calcium/calmodulin-dependent protein kinase II inhibitor 1 OS=Mus musculus GN=Camk2n1 PE=1 SV=1 - [CAMK2N1_MOUSE] | 57.69 | 1 | 2  | 5  | 31  | 1.191 | 1.674 | 2.218 | 1.048 | 79.42  | 57.69 | 9  | 31  | 78   | 8.5   | 5.45 |
| P54729   | NEDD8 ultimate buster 1 OS=Mus musculus GN=Nub1 PE=1 SV=2 - [NUB1_MOUSE]                                          | 15.31 | 1 | 11 | 12 | 34  | 0.665 | 0.969 | 0.884 | 1.048 | 95.87  | 15.31 | 19 | 34  | 614  | 70.3  | 5.88 |
| Q3UDW8-2 | Isoform 2 of Heparan-alpha-glucosaminide N-acetyltransferase OS=Mus musculus GN=Hgsnat - [HGNAT_MOUSE]            | 1.76  | 2 | 1  | 1  | 3   | 0.865 | 0.684 | 0.925 | 1.048 | 9.25   | 1.76  | 2  | 3   | 624  | 69.1  | 7.85 |
| Q8CBW4   | DBB1- and CUL4-associated factor 12-like protein 1 OS=Mus musculus GN=Dcaf12l1 PE=2 SV=1 - [DCAF12L1_MOUSE]       | 9.78  | 2 | 4  | 4  | 7   | 0.804 | 1.110 | 0.819 | 1.048 | 12.34  | 9.78  | 6  | 7   | 501  | 54.3  | 8.13 |
| Q6PFY1   | FCH and double SH3 domains protein 1 OS=Mus musculus GN=Fchsdl1 PE=2 SV=1 - [FCHSD1_MOUSE]                        | 1.89  | 1 | 1  | 1  | 6   | 0.905 | 1.642 | 0.925 | 1.048 | 15.74  | 1.89  | 2  | 6   | 688  | 76.2  | 5.55 |
| Q59J78   | Mimitin, mitochondrial OS=Mus musculus GN=Ndufaf2 PE=2 SV=1 - [MIMIT_MOUSE]                                       | 66.07 | 1 | 12 | 12 | 47  | 1.602 | 0.626 | 0.823 | 1.048 | 118.42 | 66.07 | 22 | 47  | 168  | 19.6  | 8.25 |
| Q8BGY3   | Leucine zipper protein 2 OS=Mus musculus GN=Luzp2 PE=2 SV=1 - [LUZP2_MOUSE]                                       | 28.12 | 1 | 10 | 11 | 35  | 1.323 | 0.931 | 1.046 | 1.048 | 97.44  | 28.12 | 19 | 35  | 345  | 39.0  | 8.50 |
| Q9Z2C9   | Myotubularin-related protein 7 OS=Mus musculus GN=Mtmr7 PE=2 SV=2 - [MTMR7_MOUSE]                                 | 26.36 | 5 | 13 | 14 | 45  | 0.817 | 0.865 | 0.931 | 1.048 | 142.38 | 26.36 | 23 | 45  | 660  | 75.6  | 6.43 |
| Q91YL2   | E3 ubiquitin-protein ligase RNF126 OS=Mus musculus GN=Rnf126 PE=1 SV=1 - [RNF126_MOUSE]                           | 10.22 | 1 | 2  | 2  | 4   | 1.229 | 1.351 | 1.387 | 1.048 | 10.57  | 10.22 | 3  | 4   | 313  | 34.1  | 5.17 |
| Q8CBY8-2 | Isoform 2 of Dynactin subunit 4 OS=Mus musculus GN=Dctn4 - [DCTN4_MOUSE]                                          | 25.87 | 2 | 11 | 11 | 39  | 0.862 | 0.932 | 1.154 | 1.048 | 120.81 | 25.87 | 19 | 39  | 460  | 52.2  | 7.69 |

|          |                                                                                                                                                      |       |   |    |    |     |       |       |       |       |         |       |    |     |      |       |      |
|----------|------------------------------------------------------------------------------------------------------------------------------------------------------|-------|---|----|----|-----|-------|-------|-------|-------|---------|-------|----|-----|------|-------|------|
| Q91V41   | Ras-related protein Rab-14<br>OS=Mus musculus<br>GN=Rab14 PE=1 SV=3 -<br>[RAB14_MOUSE]                                                               | 72.09 | 2 | 10 | 12 | 154 | 0.756 | 0.897 | 0.918 | 1.048 | 450.18  | 72.09 | 24 | 154 | 215  | 23.9  | 6.21 |
| Q60649   | Caseinolytic peptidase B<br>protein homolog OS=Mus<br>musculus GN=Cjpb PE=1<br>SV=1 - [CLPB_MOUSE]                                                   | 30.58 | 3 | 13 | 17 | 45  | 1.115 | 1.134 | 1.056 | 1.048 | 146.10  | 30.58 | 31 | 45  | 677  | 76.0  | 8.51 |
| Q3V1Z0   | Iporin OS=Mus musculus<br>GN=Rusc2 PE=2 SV=1 -<br>[Q3V1Z0_MOUSE]                                                                                     | 9.46  | 4 | 7  | 7  | 16  | 0.813 | 0.780 | 0.950 | 1.048 | 50.22   | 9.46  | 11 | 16  | 1523 | 162.2 | 6.58 |
| P40336   | Vacuolar protein sorting-<br>associated protein 26A<br>OS=Mus musculus<br>GN=Vps26a PE=2 SV=1 -<br>[VP26A_MOUSE]                                     | 32.11 | 2 | 10 | 11 | 48  | 0.940 | 1.062 | 1.020 | 1.048 | 122.90  | 32.11 | 21 | 48  | 327  | 38.1  | 6.57 |
| Q8C145   | Zinc transporter ZIP6<br>OS=Mus musculus<br>GN=Slc39a6 PE=1 SV=1 -<br>[S39A6_MOUSE]                                                                  | 11.37 | 2 | 8  | 8  | 27  | 0.925 | 1.251 | 1.162 | 1.048 | 107.50  | 11.37 | 13 | 27  | 765  | 86.3  | 6.84 |
| G3UWY5   | E3 ubiquitin-protein ligase<br>ZNR1 (Fragment)<br>OS=Mus musculus<br>GN=Znr1 PE=4 SV=1 -<br>[G3UWY5_MOUSE]                                           | 26.14 | 7 | 1  | 2  | 6   | 1.231 | 2.441 | 1.241 | 1.048 | 23.33   | 26.14 | 4  | 6   | 88   | 9.8   | 5.63 |
| Q9WU28   | Prefoldin subunit 5<br>OS=Mus musculus<br>GN=Pfdn5 PE=1 SV=1 -<br>[PFD5_MOUSE]                                                                       | 64.94 | 6 | 9  | 9  | 39  | 1.349 | 1.102 | 1.115 | 1.048 | 109.57  | 64.94 | 14 | 39  | 154  | 17.3  | 6.33 |
| P98200   | Probable phospholipid-<br>transporting ATPase 1B<br>OS=Mus musculus<br>GN=Atp8a2 PE=1 SV=1 -<br>[AT8A2_MOUSE]                                        | 12.20 | 3 | 9  | 14 | 31  | 0.770 | 0.780 | 0.725 | 1.048 | 89.58   | 12.20 | 23 | 31  | 1148 | 129.3 | 7.33 |
| Q76MZ3   | Serine/threonine-protein<br>phosphatase 2A 65 kDa<br>regulatory subunit A alpha<br>isoform OS=Mus musculus<br>GN=Ppp2r1a PE=1 SV=3 -<br>[2AAA_MOUSE] | 55.52 | 4 | 21 | 28 | 292 | 0.663 | 1.239 | 1.026 | 1.049 | 835.43  | 55.52 | 50 | 292 | 589  | 65.3  | 5.11 |
| D3YZI9   | Protein Pgbd5 OS=Mus<br>musculus GN=Pgbd5 PE=2<br>SV=1 - [D3YZI9_MOUSE]                                                                              | 20.65 | 3 | 8  | 8  | 26  | 0.938 | 1.409 | 1.255 | 1.049 | 75.46   | 20.65 | 12 | 26  | 523  | 58.3  | 8.85 |
| Q08331   | Calretinin OS=Mus<br>musculus GN=Calb2 PE=1<br>SV=3 - [CALB2_MOUSE]                                                                                  | 78.23 | 1 | 23 | 24 | 613 | 1.642 | 0.933 | 0.888 | 1.049 | 1655.95 | 78.23 | 45 | 613 | 271  | 31.4  | 5.02 |
| F8VPR1   | Leiomodlin-1 OS=Mus<br>musculus GN=Lmod1<br>PE=2 SV=1 -<br>[F8VPR1_MOUSE]                                                                            | 4.03  | 2 | 2  | 2  | 2   | 0.610 | 1.543 | 0.865 | 1.049 | 0.00    | 4.03  | 2  | 2   | 595  | 66.2  | 9.19 |
| Q3UHJ0-2 | Isoform 2 of AP2-<br>associated protein kinase 1<br>OS=Mus musculus<br>GN=Aak1 -                                                                     | 56.83 | 2 | 31 | 34 | 309 | 1.120 | 1.252 | 1.382 | 1.049 | 1007.66 | 56.83 | 64 | 309 | 878  | 94.6  | 6.61 |
| Q9CZG3   | COMM domain-containing<br>protein 8 OS=Mus<br>musculus GN=Comm8<br>PE=2 SV=1 -                                                                       | 46.99 | 1 | 7  | 7  | 25  | 1.344 | 1.159 | 1.023 | 1.049 | 56.76   | 46.99 | 11 | 25  | 183  | 20.8  | 5.59 |
| P70168   | Importin subunit beta-1<br>OS=Mus musculus<br>GN=Kpnb1 PE=1 SV=2 -<br>[IMB1_MOUSE]                                                                   | 46.35 | 1 | 32 | 32 | 225 | 0.662 | 1.382 | 0.892 | 1.049 | 683.70  | 46.35 | 57 | 225 | 876  | 97.1  | 4.78 |
| Q80Z16   | E3 ubiquitin-protein ligase<br>LRSAM1 OS=Mus<br>musculus GN=Lrsam1<br>PE=2 SV=1 -                                                                    | 24.21 | 4 | 14 | 15 | 43  | 1.164 | 1.476 | 0.978 | 1.049 | 125.06  | 24.21 | 26 | 43  | 727  | 83.9  | 6.14 |
| P58873   | Rhomboid-related protein<br>3 OS=Mus musculus<br>GN=Rhd3 PE=2 SV=1 -<br>[RHBL3_MOUSE]                                                                | 5.69  | 1 | 2  | 3  | 8   | 0.852 | 1.094 | 1.032 | 1.049 | 15.31   | 5.69  | 5  | 8   | 404  | 45.2  | 7.58 |
| D3YUH8   | Rho GTPase-activating<br>protein 20 OS=Mus<br>musculus GN=Arhgap20<br>PE=2 SV=1 -                                                                    | 2.97  | 2 | 2  | 3  | 5   | 1.094 | 1.018 | 1.437 | 1.049 | 14.26   | 2.97  | 4  | 5   | 1146 | 127.7 | 6.99 |
| Q8K1B8   | Fermitin family homolog 3<br>OS=Mus musculus<br>GN=Fermt3 PE=1 SV=1 -<br>[URP2_MOUSE]                                                                | 14.59 | 1 | 7  | 7  | 11  | 0.954 | 1.478 | 0.986 | 1.049 | 37.08   | 14.59 | 10 | 11  | 665  | 75.6  | 7.05 |
| Q8BH61   | Coagulation factor XIII A<br>chain OS=Mus musculus<br>GN=F13a1 PE=2 SV=3 -<br>[F13A_MOUSE]                                                           | 20.08 | 1 | 10 | 10 | 27  | 1.046 | 2.157 | 0.831 | 1.049 | 53.70   | 20.08 | 15 | 27  | 732  | 83.2  | 5.92 |
| P35969   | Vascular endothelial<br>growth factor receptor 1<br>OS=Mus musculus<br>GN=Fit1 PE=1 SV=1 -<br>[VGFR1_MOUSE]                                          | 3.45  | 9 | 3  | 4  | 16  | 1.207 | 1.061 | 1.111 | 1.049 | 36.95   | 3.45  | 6  | 16  | 1333 | 149.8 | 8.31 |
| B2RUR8   | OTU domain-containing<br>protein 7B OS=Mus<br>musculus GN=Otud7b<br>PE=1 SV=1 -                                                                      | 16.55 | 3 | 6  | 11 | 36  | 1.853 | 0.599 | 1.021 | 1.049 | 84.35   | 16.55 | 17 | 36  | 840  | 91.9  | 6.86 |
| Q6P6J0   | tRNA-specific adenosine<br>deaminase 2 OS=Mus<br>musculus GN=Adat2 PE=2<br>SV=1 - [ADAT2_MOUSE]                                                      | 27.23 | 1 | 3  | 3  | 5   | 1.048 | 1.347 | 1.182 | 1.049 | 11.91   | 27.23 | 4  | 5   | 191  | 21.3  | 5.88 |
| Q6P116   | PH and SEC7 domain-<br>containing protein 2<br>OS=Mus musculus<br>GN=Psd2 PE=2 SV=1 -<br>[PSD2_MOUSE]                                                | 17.92 | 4 | 14 | 14 | 39  | 0.998 | 0.685 | 0.815 | 1.049 | 112.02  | 17.92 | 26 | 39  | 770  | 84.2  | 5.21 |
| G3UWV4   | Serine/threonine-protein<br>kinase BRSK2 OS=Mus<br>musculus GN=Brsk2 PE=2<br>SV=1 - [G3UWV4_MOUSE]                                                   | 42.32 | 4 | 3  | 25 | 123 | 1.280 | 0.866 | 1.121 | 1.050 | 383.17  | 42.32 | 44 | 123 | 697  | 77.7  | 8.82 |

|          |                                                                                                                        |       |   |    |    |     |       |       |       |       |         |       |     |     |      |       |      |
|----------|------------------------------------------------------------------------------------------------------------------------|-------|---|----|----|-----|-------|-------|-------|-------|---------|-------|-----|-----|------|-------|------|
| Q6PA06   | Atlastin-2 OS=Mus musculus GN=Atb2 PE=1 SV=1 - [ATLA2_MOUSE]                                                           | 29.16 | 3 | 11 | 13 | 47  | 0.610 | 0.914 | 1.005 | 1.050 | 147.27  | 29.16 | 24  | 47  | 583  | 66.2  | 5.43 |
| B2RPU2   | Pleckstrin homology domain-containing family D member 1 OS=Mus musculus GN=Plekhd1 PE=2 SV=1 - [PLEKH1_MOUSE]          | 10.30 | 1 | 4  | 4  | 6   | 1.130 | 0.555 | 1.170 | 1.050 | 15.64   | 10.30 | 5   | 6   | 505  | 59.1  | 6.44 |
| Q80YA9   | Connector enhancer of kinase suppressor of ras 2 OS=Mus musculus GN=Cnksr2 PE=1 SV=1 - [CNKR2_MOUSE]                   | 32.66 | 3 | 28 | 29 | 75  | 0.641 | 1.847 | 2.050 | 1.050 | 216.46  | 32.66 | 48  | 75  | 1032 | 117.3 | 6.79 |
| Q8BPN8-2 | Isoform 2 of Dmx-like protein 2 OS=Mus musculus GN=Dmxl2 - [DMXL2_MOUSE]                                               | 35.90 | 7 | 85 | 92 | 433 | 0.639 | 1.129 | 1.093 | 1.050 | 1343.23 | 35.90 | 164 | 433 | 3022 | 336.8 | 6.46 |
| Q921P9   | Transcription elongation factor A protein-like 1 OS=Mus musculus GN=Tcea1 PE=2 SV=1 - [TCAL1_MOUSE]                    | 15.76 | 1 | 3  | 3  | 6   | 1.349 | 1.225 | 1.105 | 1.050 | 20.13   | 15.76 | 6   | 6   | 165  | 19.3  | 4.54 |
| Q6URW6-3 | Isoform 3 of Myosin-14 OS=Mus musculus GN=Myh14 - [MYH14_MOUSE]                                                        | 37.73 | 6 | 2  | 72 | 236 | 0.738 | 0.983 | 0.994 | 1.050 | 673.67  | 37.73 | 124 | 236 | 2033 | 231.5 | 5.55 |
| P97480-2 | Isoform 2 of Eyes absent homolog 3 OS=Mus musculus GN=Eya3 - [EYA3_MOUSE]                                              | 2.64  | 3 | 1  | 1  | 2   | 0.891 | 1.433 | 0.917 | 1.050 | 5.82    | 2.64  | 2   | 2   | 416  | 45.5  | 5.85 |
| Q99KW9   | T-cell immunomodulatory protein OS=Mus musculus GN=Itfg1 PE=2 SV=2 - [TIP_MOUSE]                                       | 16.23 | 1 | 7  | 7  | 19  | 0.891 | 1.068 | 0.856 | 1.050 | 53.18   | 16.23 | 10  | 19  | 610  | 67.4  | 5.73 |
| D3Z2Q7   | Protein Hmnc1 OS=Mus musculus GN=Hmnc1 PE=2 SV=1 - [D3Z2Q7_MOUSE]                                                      | 2.45  | 2 | 7  | 9  | 14  | 1.873 | 1.009 | 1.067 | 1.050 | 16.58   | 2.45  | 9   | 14  | 5517 | 597.9 | 6.58 |
| Q9CWX8   | NADH dehydrogenase [ubiquinone] complex I, assembly factor 7 OS=Mus musculus GN=Ndufa7 PE=2 SV=4 - [NDUFA7_MOUSE]      | 31.19 | 2 | 11 | 11 | 37  | 0.787 | 1.110 | 0.932 | 1.050 | 94.91   | 31.19 | 20  | 37  | 436  | 48.4  | 6.95 |
| G3UXG8   | All-trans retinoic acid-induced differentiation factor (Fragment) OS=Mus musculus GN=Atraid PE=2 SV=1 - [G3UXG8_MOUSE] | 11.89 | 4 | 2  | 2  | 8   | 1.013 | 0.947 | 1.069 | 1.050 | 16.45   | 11.89 | 4   | 8   | 143  | 15.1  | 5.44 |
| Q6ZQF7   | Protein Jade-2 OS=Mus musculus GN=Phf15 PE=2 SV=2 - [JADE2_MOUSE]                                                      | 6.88  | 3 | 3  | 3  | 5   | 1.636 | 1.192 | 1.235 | 1.050 | 6.99    | 6.88  | 5   | 5   | 829  | 92.1  | 5.77 |
| AZA176   | Hemicentin-2 OS=Mus musculus GN=Hmnc2 PE=1 SV=1 - [HMCN2_MOUSE]                                                        | 1.16  | 2 | 6  | 6  | 10  | 2.746 | 0.976 | 0.720 | 1.050 | 13.92   | 1.16  | 6   | 10  | 5100 | 546.9 | 5.71 |
| AZAF59   | MCG1031886 OS=Mus musculus GN=Tex13a PE=4 SV=1 - [AZAF59_MOUSE]                                                        | 2.92  | 1 | 1  | 1  | 1   | 0.762 | 1.485 | 1.888 | 1.050 | 2.73    | 2.92  | 1   | 1   | 377  | 42.7  | 8.12 |
| Q3TT38   | Uncharacterized protein Cborf106 homolog OS=Mus musculus GN=D17Wsu92e PE=2 SV=2 - [CF106_MOUSE]                        | 12.03 | 3 | 2  | 2  | 3   | 1.373 | 1.061 | 1.166 | 1.050 | 8.81    | 12.03 | 3   | 3   | 291  | 32.1  | 4.48 |
| Q8C4B4   | Protein unc-119 homolog B OS=Mus musculus GN=Unc119b PE=2 SV=1 - [U119B_MOUSE]                                         | 25.50 | 2 | 4  | 5  | 15  | 1.044 | 0.953 | 1.019 | 1.050 | 60.11   | 25.50 | 8   | 15  | 251  | 28.3  | 5.72 |
| P11087-2 | Isoform 2 of Collagen alpha-1(I) chain OS=Mus musculus GN=Col1a1 - [CO1A1_MOUSE]                                       | 25.31 | 2 | 15 | 15 | 92  | 0.836 | 4.705 | 1.071 | 1.050 | 307.88  | 25.31 | 22  | 92  | 1225 | 117.7 | 5.72 |
| F6TZU3   | Gigaxonin (Fragment) OS=Mus musculus GN=Gan PE=4 SV=1 - [F6TZU3_MOUSE]                                                 | 12.40 | 2 | 5  | 5  | 11  | 0.990 | 0.919 | 1.160 | 1.050 | 29.34   | 12.40 | 7   | 11  | 597  | 67.6  | 5.92 |
| Q3TCJ1   | BRISC complex subunit Abro1 OS=Mus musculus GN=Fam175b PE=2 SV=1 - [F175B_MOUSE]                                       | 37.59 | 3 | 11 | 11 | 32  | 1.010 | 1.085 | 1.023 | 1.050 | 84.90   | 37.59 | 18  | 32  | 415  | 46.9  | 6.18 |
| B1AX58   | Plastin-3 OS=Mus musculus GN=Pls3 PE=2 SV=1 - [B1AX58_MOUSE]                                                           | 51.33 | 2 | 24 | 30 | 162 | 0.920 | 0.811 | 0.956 | 1.050 | 501.01  | 51.33 | 49  | 162 | 639  | 71.7  | 5.62 |
| Q3UN02   | Lysocardiolipin acyltransferase 1 OS=Mus musculus GN=Lclat1 PE=2 SV=2 - [LCLT1_MOUSE]                                  | 21.01 | 2 | 7  | 7  | 16  | 0.667 | 1.284 | 0.965 | 1.050 | 49.28   | 21.01 | 11  | 16  | 376  | 44.4  | 8.53 |
| Q8CAD1   | Ras-binding protein DA-Raf OS=Mus musculus GN=Araf PE=2 SV=1 - [Q8CAD1_MOUSE]                                          | 50.54 | 2 | 1  | 8  | 42  | 0.721 | 0.872 | 0.810 | 1.050 | 117.90  | 50.54 | 16  | 42  | 186  | 20.9  | 8.47 |
| F6SEU4   | Ras/Rap GTPase-activating protein SynGAP OS=Mus musculus GN=Syngap1 PE=3 SV=2 - [SYGP1_MOUSE]                          | 42.46 | 1 | 3  | 52 | 389 | 0.752 | 2.985 | 2.887 | 1.050 | 1139.12 | 42.46 | 93  | 389 | 1340 | 148.1 | 8.98 |
| Q8BH80   | Vesicle-associated membrane protein, associated protein B and C OS=Mus musculus GN=Vapb PE=2 SV=1 - [VAPB_MOUSE]       | 58.02 | 2 | 13 | 14 | 84  | 0.901 | 0.737 | 0.915 | 1.051 | 220.50  | 58.02 | 25  | 84  | 243  | 26.9  | 7.78 |
| P97372   | Proteasome activator complex subunit 2 OS=Mus musculus GN=Psmc2 PE=2 SV=4 - [PSME2_MOUSE]                              | 53.56 | 3 | 12 | 12 | 36  | 0.797 | 1.817 | 0.685 | 1.051 | 109.38  | 53.56 | 20  | 36  | 239  | 27.0  | 5.76 |

|          |                                                                                                                                                             |       |   |    |    |      |       |       |       |       |         |       |    |      |      |       |       |
|----------|-------------------------------------------------------------------------------------------------------------------------------------------------------------|-------|---|----|----|------|-------|-------|-------|-------|---------|-------|----|------|------|-------|-------|
| Q60571   | Corticotropin-releasing factor-binding protein<br>OS=Mus musculus<br>GN=Crbp PE=2 SV=1 - [CRHBP_MOUSE]                                                      | 15.22 | 1 | 3  | 3  | 3    | 1.833 | 2.194 | 1.009 | 1.051 | 8.87    | 15.22 | 3  | 3    | 322  | 36.0  | 6.60  |
| Q8CE96   | tRNA (adenine58)-N(1)-methyltransferase non-catalytic subunit TRM6<br>OS=Mus musculus<br>GN=Trmt6 PE=1 SV=1 - [TRM6_MOUSE]                                  | 7.24  | 3 | 3  | 3  | 6    | 0.872 | 0.656 | 0.997 | 1.051 | 23.74   | 7.24  | 4  | 6    | 497  | 55.5  | 6.95  |
| P48455   | Serine/threonine-protein phosphatase 2B catalytic subunit gamma isoform<br>OS=Mus musculus<br>GN=Ppp3cc PE=2 SV=1 - [PP2BC_MOUSE]                           | 13.84 | 1 | 3  | 7  | 47   | 0.888 | 1.275 | 1.165 | 1.051 | 129.14  | 13.84 | 13 | 47   | 513  | 58.7  | 7.25  |
| Q9D7X8   | Gamma-glutamylcyclotransferase<br>OS=Mus musculus<br>GN=Ggct PE=2 SV=1 - [GGCT_MOUSE]                                                                       | 22.34 | 1 | 5  | 5  | 17   | 1.117 | 0.791 | 0.978 | 1.051 | 47.41   | 22.34 | 8  | 17   | 188  | 21.2  | 5.67  |
| Q80WS3   | rRNA/rRNA 2'-O-methyltransferase<br>OS=Mus musculus<br>GN=Fbl1 PE=2 SV=1 - [FBL1_MOUSE]                                                                     | 35.67 | 1 | 10 | 12 | 28   | 0.911 | 0.613 | 0.818 | 1.051 | 74.49   | 35.67 | 20 | 28   | 314  | 33.3  | 10.15 |
| P61202   | fibroblast growth factor receptor 3<br>OS=Mus musculus<br>GN=Cops2 PE=1 SV=1 - [COPS2_MOUSE]                                                                | 48.76 | 3 | 21 | 21 | 101  | 0.703 | 1.155 | 0.875 | 1.051 | 298.64  | 48.76 | 36 | 101  | 443  | 51.6  | 5.53  |
| A2AHJ4   | Bromodomain and WD repeat-containing protein 3<br>OS=Mus musculus<br>GN=Brwd3 PE=2 SV=1 - [BRWD3_MOUSE]                                                     | 3.11  | 1 | 3  | 3  | 3    | 1.426 | 0.935 | 1.043 | 1.051 | 4.93    | 3.11  | 3  | 3    | 1799 | 202.8 | 7.42  |
| F7ABZ6   | Protein Dnah10 (Fragment)<br>OS=Mus musculus<br>GN=Dnah10 PE=4 SV=1 - [DNAH10_MOUSE]                                                                        | 1.49  | 2 | 3  | 7  | 13   | 2.350 | 1.071 | 1.230 | 1.051 | 27.97   | 1.49  | 8  | 13   | 4365 | 502.5 | 5.94  |
| Q91YN1-2 | isoform 2 of Protein FAM118A<br>OS=Mus musculus<br>GN=Fam118a PE=1 SV=1 - [F118A_MOUSE]                                                                     | 4.40  | 2 | 1  | 1  | 2    | 0.616 | 1.378 | 1.083 | 1.051 | 7.91    | 4.40  | 2  | 2    | 250  | 27.9  | 7.06  |
| P17665   | Cytochrome c oxidase subunit 7C, mitochondrial<br>OS=Mus musculus<br>GN=Cox7c PE=1 SV=1 - [COX7C_MOUSE]                                                     | 38.10 | 4 | 3  | 3  | 8    | 2.116 | 0.976 | 1.062 | 1.051 | 23.55   | 38.10 | 4  | 8    | 63   | 7.3   | 11.00 |
| Q8K0T4   | Katanin p60 ATPase-containing subunit A-like 1<br>OS=Mus musculus<br>GN=Katn1 PE=1 SV=1 - [KATN1_MOUSE]                                                     | 36.27 | 7 | 17 | 17 | 58   | 1.016 | 1.030 | 1.049 | 1.051 | 156.02  | 36.27 | 30 | 58   | 488  | 55.1  | 7.09  |
| Q3URE9   | Leucine-rich repeat and immunoglobulin-like domain-containing nogo receptor-interacting protein 2<br>OS=Mus musculus<br>GN=Lingo2 PE=2 SV=1 - [LIGO2_MOUSE] | 7.10  | 1 | 2  | 4  | 11   | 0.895 | 1.156 | 0.953 | 1.051 | 37.08   | 7.10  | 7  | 11   | 606  | 68.0  | 8.13  |
| O88572   | Low-density lipoprotein receptor-related protein 6<br>OS=Mus musculus<br>GN=Lrp6 PE=1 SV=1 - [LRP6_MOUSE]                                                   | 0.68  | 1 | 1  | 1  | 4    | 4.625 | 0.776 | 1.253 | 1.052 | 7.42    | 0.68  | 2  | 4    | 1613 | 180.1 | 5.33  |
| Q8BLK9-3 | isoform 3 of Ribosomal protein S6 kinase delta-1<br>OS=Mus musculus<br>GN=Rps6k1 - [RPS6K1_MOUSE]                                                           | 23.91 | 5 | 16 | 16 | 41   | 1.279 | 1.262 | 1.139 | 1.052 | 114.84  | 23.91 | 24 | 41   | 916  | 100.3 | 4.92  |
| P60879   | Synaptosomal-associated protein 25<br>OS=Mus musculus<br>GN=Snap25 PE=1 SV=1 - [SNAP25_MOUSE]                                                               | 72.33 | 1 | 5  | 20 | 1019 | 1.203 | 0.899 | 1.352 | 1.052 | 2931.08 | 72.33 | 40 | 1019 | 206  | 23.3  | 4.77  |
| E9Q6Q8   | TBC1 domain family member 4<br>OS=Mus musculus<br>GN=Tbc1d4 PE=2 SV=1 - [TBC1D4_MOUSE]                                                                      | 7.88  | 9 | 8  | 8  | 15   | 1.405 | 0.822 | 1.128 | 1.052 | 44.63   | 7.88  | 12 | 15   | 1243 | 140.2 | 7.31  |
| E9Q4P1   | Protein Wdfy1<br>OS=Mus musculus<br>GN=Wdfy1 PE=4 SV=1 - [E9Q4P1_MOUSE]                                                                                     | 25.61 | 4 | 9  | 9  | 37   | 0.963 | 0.972 | 0.853 | 1.052 | 107.89  | 25.61 | 16 | 37   | 410  | 46.2  | 7.34  |
| Q8BP11-2 | isoform 2 of Protein kintoun<br>OS=Mus musculus<br>GN=Dnaaf2 - [KTU_MOUSE]                                                                                  | 3.48  | 2 | 2  | 2  | 2    | 1.243 | 1.038 | 0.997 | 1.052 | 7.03    | 3.48  | 2  | 2    | 776  | 84.6  | 5.05  |
| Q62087   | Serum paraoxonase/lactonase 3<br>OS=Mus musculus<br>GN=Pon3 PE=1 SV=2 - [PON3_MOUSE]                                                                        | 17.80 | 2 | 3  | 3  | 9    | 1.516 | 1.628 | 0.791 | 1.052 | 34.98   | 17.80 | 6  | 9    | 354  | 39.3  | 5.74  |
| Q0VBDO   | Integrin beta<br>OS=Mus musculus<br>GN=Itgb8 PE=2 SV=1 - [Q0VBDO_MOUSE]                                                                                     | 23.86 | 1 | 15 | 16 | 41   | 0.836 | 1.561 | 1.134 | 1.052 | 120.07  | 23.86 | 29 | 41   | 767  | 84.5  | 7.09  |
| Q14CH7   | Alanine-tRNA ligase, mitochondrial<br>OS=Mus musculus<br>GN=Aars2 PE=2 SV=1 - [SYAM_MOUSE]                                                                  | 12.35 | 1 | 11 | 11 | 38   | 0.977 | 0.768 | 0.902 | 1.052 | 103.05  | 12.35 | 19 | 38   | 980  | 106.7 | 6.18  |
| Q8K1X4   | NCK associated protein 1 like<br>OS=Mus musculus<br>GN=Nckap1 PE=2 SV=1 - [Q8K1X4_MOUSE]                                                                    | 2.82  | 1 | 1  | 3  | 32   | 2.900 | 1.248 | 1.595 | 1.052 | 80.52   | 2.82  | 5  | 32   | 1134 | 128.8 | 6.64  |
| Q91YP3   | Putative deoxyribose-phosphate aldolase<br>OS=Mus musculus<br>GN=Dera PE=2 SV=1 - [DEOC_MOUSE]                                                              | 8.18  | 1 | 2  | 2  | 3    | 1.501 | 1.091 | 0.812 | 1.052 | 6.52    | 8.18  | 3  | 3    | 318  | 35.0  | 8.72  |

|          |                                                                                                                                        |       |   |    |    |      |       |       |       |       |          |       |    |      |      |       |       |
|----------|----------------------------------------------------------------------------------------------------------------------------------------|-------|---|----|----|------|-------|-------|-------|-------|----------|-------|----|------|------|-------|-------|
| Q9WUN2   | Serine/threonine-protein kinase TBK1 OS=Mus musculus GN=Tbk1 PE=1 SV=1 - [TBK1_MOUSE]                                                  | 16.74 | 1 | 10 | 10 | 28   | 0.851 | 0.945 | 0.926 | 1.052 | 79.93    | 16.74 | 18 | 28   | 729  | 83.4  | 6.87  |
| Q8VHN8   | Protein syndesmos OS=Mus musculus GN=Nudt16l1 PE=1 SV=2 - [SDOS_MOUSE]                                                                 | 17.54 | 4 | 3  | 4  | 13   | 2.027 | 0.989 | 0.979 | 1.052 | 43.64    | 17.54 | 7  | 13   | 211  | 23.4  | 9.26  |
| E9Q7X6-2 | Isoform 2 of Protein HEG homolog 1 OS=Mus musculus GN=Heg1 - [HEG1_MOUSE]                                                              | 3.95  | 5 | 3  | 3  | 4    | 1.921 | 1.078 | 1.074 | 1.052 | 13.52    | 3.95  | 4  | 4    | 1240 | 131.5 | 6.67  |
| B8J353   | Tripartite motif-containing protein 26 (Fragment) OS=Mus musculus GN=Trim26 PE=2 SV=1 - [B8J353_MOUSE]                                 | 9.74  | 6 | 1  | 1  | 3    | 2.886 | 1.131 | 1.166 | 1.052 | 8.43     | 9.74  | 2  | 3    | 195  | 22.7  | 9.74  |
| Q8CIP5   | Protein dispatched homolog 2 OS=Mus musculus GN=Disp2 PE=2 SV=1 - [DISP2_MOUSE]                                                        | 11.08 | 4 | 9  | 9  | 20   | 1.000 | 0.672 | 0.690 | 1.052 | 59.05    | 11.08 | 13 | 20   | 1345 | 147.8 | 6.76  |
| Q9R013   | Cathepsin F OS=Mus musculus GN=Ctsf PE=2 SV=1 - [CATF_MOUSE]                                                                           | 12.55 | 1 | 5  | 5  | 11   | 0.730 | 1.223 | 1.061 | 1.052 | 41.91    | 12.55 | 8  | 11   | 462  | 51.6  | 6.55  |
| O88207   | Collagen alpha-1(V) chain OS=Mus musculus GN=Col5a1 PE=2 SV=2 - [CO5A1_MOUSE]                                                          | 1.41  | 1 | 1  | 2  | 3    | 0.470 | 1.296 | 1.012 | 1.052 | 6.98     | 1.41  | 3  | 3    | 1838 | 183.6 | 4.98  |
| P63216   | Guanine nucleotide-binding protein G(I)/G(S)/G(O) subunit gamma-3 OS=Mus musculus GN=Gng3 PE=1 SV=1 - [G63216_MOUSE]                   | 81.33 | 1 | 6  | 6  | 143  | 0.748 | 1.498 | 1.398 | 1.053 | 443.82   | 81.33 | 12 | 143  | 75   | 8.3   | 7.78  |
| Q632W6   | Col4a5 protein OS=Mus musculus GN=Col4a5 PE=2 SV=1 - [Q632W6_MOUSE]                                                                    | 6.74  | 2 | 4  | 6  | 18   | 1.406 | 1.612 | 0.892 | 1.053 | 59.52    | 6.74  | 9  | 18   | 1691 | 161.7 | 8.10  |
| Q8VDZ4   | Palmitoyltransferase ZDHHC5 OS=Mus musculus GN=Zdhc5 PE=1 SV=1 - [ZDHHC5_MOUSE]                                                        | 38.32 | 6 | 18 | 20 | 64   | 1.070 | 0.886 | 1.262 | 1.053 | 179.28   | 38.32 | 31 | 64   | 715  | 77.5  | 9.01  |
| P99024   | Tubulin beta-5 chain OS=Mus musculus GN=Tubb5 PE=1 SV=1 - [TB85_MOUSE]                                                                 | 83.11 | 2 | 6  | 32 | 4204 | 0.840 | 1.291 | 1.075 | 1.053 | 11113.59 | 83.11 | 60 | 4204 | 444  | 49.6  | 4.89  |
| P70202   | Latexin OS=Mus musculus GN=Lxn PE=1 SV=2 - [LXN_MOUSE]                                                                                 | 25.23 | 1 | 4  | 4  | 32   | 1.189 | 1.059 | 0.865 | 1.053 | 129.46   | 25.23 | 7  | 32   | 222  | 25.5  | 5.74  |
| Q5DTN8   | Janus kinase and microtubule-interacting protein 3 OS=Mus musculus GN=Jakmp3 PE=2 SV=2 - [JAKMP3_MOUSE]                                | 18.13 | 5 | 12 | 16 | 56   | 1.738 | 0.768 | 1.273 | 1.053 | 163.06   | 18.13 | 27 | 56   | 844  | 98.7  | 5.74  |
| Q9D8Z6   | Autophagy-related protein 101 OS=Mus musculus GN=Atg101 PE=2 SV=1 - [ATGA1_MOUSE]                                                      | 19.72 | 1 | 4  | 4  | 11   | 1.251 | 1.268 | 1.012 | 1.053 | 31.39    | 19.72 | 7  | 11   | 218  | 25.0  | 6.15  |
| E9Q467   | Protein Abcc4 OS=Mus musculus GN=Abcc4 PE=2 SV=1 - [E9Q467_MOUSE]                                                                      | 7.12  | 2 | 7  | 7  | 16   | 1.171 | 1.584 | 1.041 | 1.053 | 43.99    | 7.12  | 12 | 16   | 1250 | 140.1 | 8.29  |
| Q8BFT9   | Synaptic vesicle 2-related protein OS=Mus musculus GN=Swop PE=1 SV=1 - [SVOF_MOUSE]                                                    | 17.34 | 2 | 6  | 6  | 22   | 0.815 | 1.101 | 0.937 | 1.053 | 56.21    | 17.34 | 9  | 22   | 548  | 60.7  | 5.85  |
| G5E8T6   | Membrane associated guanylate kinase, WW and PDZ domain containing 3, isoform CRA_a OS=Mus musculus GN=Nag3 PE=4 SV=1 - [G5E8T6_MOUSE] | 18.70 | 3 | 22 | 25 | 61   | 1.035 | 0.996 | 1.199 | 1.053 | 143.92   | 18.70 | 39 | 61   | 1476 | 161.5 | 8.05  |
| D3Z5R4   | WAS/WASL-interacting protein family member 3 OS=Mus musculus GN=Wipf3 PE=4 SV=1 - [D3Z5R4_MOUSE]                                       | 36.30 | 4 | 12 | 12 | 49   | 1.108 | 2.095 | 2.558 | 1.053 | 128.13   | 36.30 | 19 | 49   | 449  | 45.1  | 10.84 |
| Q8BH57-2 | Isoform 2 of WD repeat-containing protein 48 OS=Mus musculus GN=Wdr48 - [WDR48_MOUSE]                                                  | 38.37 | 4 | 24 | 24 | 109  | 1.265 | 1.161 | 0.996 | 1.053 | 291.31   | 38.37 | 39 | 109  | 662  | 74.4  | 7.17  |
| Q9DC63   | F-box only protein 3 OS=Mus musculus GN=Pbox3 PE=2 SV=1 - [FBX3_MOUSE]                                                                 | 23.54 | 4 | 9  | 10 | 29   | 0.860 | 0.945 | 0.844 | 1.053 | 91.92    | 23.54 | 17 | 29   | 480  | 55.2  | 5.02  |
| Q3T995   | E3 ubiquitin-protein ligase UHRF2 OS=Mus musculus GN=Uhrf2 PE=2 SV=1 - [Q3T995_MOUSE]                                                  | 3.96  | 4 | 1  | 1  | 2    | 2.162 | 1.051 | 0.996 | 1.053 | 4.57     | 3.96  | 2  | 2    | 202  | 22.4  | 6.30  |
| P08122   | Collagen alpha-2(V) chain OS=Mus musculus GN=Col4a2 PE=2 SV=4 - [CO4A2_MOUSE]                                                          | 9.20  | 2 | 10 | 11 | 36   | 1.657 | 1.283 | 1.197 | 1.053 | 115.72   | 9.20  | 19 | 36   | 1707 | 167.2 | 8.48  |
| P97481   | Endothelial PAS domain-containing protein 1 OS=Mus musculus GN=Epas1 PE=1 SV=2 - [EPAS1_MOUSE]                                         | 3.43  | 1 | 1  | 2  | 3    | 0.902 | 1.415 | 2.049 | 1.053 | 2.09     | 3.43  | 2  | 3    | 874  | 96.6  | 5.73  |
| Q641K1   | Cytosolic carboxypeptidase 1 OS=Mus musculus GN=Agtpbp1 PE=1 SV=2 - [CBPC1_MOUSE]                                                      | 11.74 | 6 | 10 | 10 | 41   | 0.883 | 0.954 | 1.232 | 1.054 | 111.40   | 11.74 | 18 | 41   | 1218 | 137.1 | 6.52  |
| Q8CDN9-2 | Isoform 2 of Leucine-rich repeat-containing protein 9 OS=Mus musculus GN=Lrrc9 - [LRR9_MOUSE]                                          | 1.04  | 3 | 1  | 1  | 1    | 1.177 | 0.996 | 1.151 | 1.054 | 0.00     | 1.04  | 1  | 1    | 1154 | 133.0 | 7.88  |



|          |                                                                                                                                 |       |   |    |    |     |       |       |       |       |        |       |    |     |      |       |      |
|----------|---------------------------------------------------------------------------------------------------------------------------------|-------|---|----|----|-----|-------|-------|-------|-------|--------|-------|----|-----|------|-------|------|
| Q6PDJ1-2 | Isoform 2 of WFAA and cache domain-containing protein 1 OS=Mus musculus GN=Cachd1 - [CAHD1_MOUSE]                               | 5.54  | 2 | 7  | 7  | 11  | 0.684 | 0.539 | 0.758 | 1.054 | 29.74  | 5.54  | 9  | 11  | 1282 | 143.1 | 6.52 |
| Q91V36   | Nuclear receptor-binding protein 2 OS=Mus musculus GN=Nrbp2 PE=1 SV=2 - [NRBP2_MOUSE]                                           | 22.85 | 1 | 10 | 11 | 34  | 0.924 | 0.974 | 0.915 | 1.054 | 88.04  | 22.85 | 19 | 34  | 499  | 57.3  | 6.35 |
| Q08761   | Vitamin K-dependent protein S OS=Mus musculus GN=Pros1 PE=2 SV=1 - [PROS_MOUSE]                                                 | 2.22  | 1 | 2  | 2  | 5   | 1.364 | 0.959 | 1.145 | 1.054 | 10.69  | 2.22  | 3  | 5   | 675  | 74.9  | 5.82 |
| D3YX48   | Solute carrier organic anion transporter family member 3A1 OS=Mus musculus GN=Slco3a1 PE=2 SV=1 - [SLCO3A1_MOUSE]               | 2.66  | 3 | 1  | 1  | 2   | 2.413 | 0.976 | 0.865 | 1.054 | 6.49   | 2.66  | 2  | 2   | 602  | 64.3  | 7.43 |
| Q99NG0   | Helicase ARIP4 OS=Mus musculus GN=Rad54i2 PE=1 SV=1 - [ARIP4_MOUSE]                                                             | 4.09  | 2 | 4  | 5  | 11  | 0.422 | 0.350 | 0.637 | 1.054 | 13.21  | 4.09  | 5  | 11  | 1466 | 162.4 | 6.13 |
| B1AR76   | Breast carcinoma-amplified sequence 3 homolog (Fragment) OS=Mus musculus GN=Bcas3 PE=2 SV=1 - [B1AR76_MOUSE]                    | 43.01 | 2 | 1  | 15 | 92  | 0.927 | 0.926 | 1.083 | 1.054 | 275.08 | 43.01 | 30 | 92  | 458  | 49.4  | 6.20 |
| Q8VCU2   | Glycosylphosphatidylinositol specific phospholipase D1 OS=Mus musculus GN=Gpld1 PE=2 SV=1 - [Q8VCU2_MOUSE]                      | 28.74 | 3 | 20 | 20 | 54  | 1.335 | 1.101 | 0.676 | 1.054 | 158.76 | 28.74 | 30 | 54  | 842  | 93.6  | 6.80 |
| P46638   | Ras-related protein Rab-11B OS=Mus musculus GN=Rab11b PE=1 SV=3 - [RB11B_MOUSE]                                                 | 58.26 | 6 | 7  | 13 | 64  | 0.738 | 0.939 | 0.954 | 1.054 | 179.16 | 58.26 | 24 | 64  | 218  | 24.5  | 5.94 |
| D3Z0B9   | Aldehyde dehydrogenase family 16 member A1 OS=Mus musculus GN=Aldh16a1 PE=2 SV=1 [D3Z0B9_MOUSE]                                 | 9.95  | 2 | 6  | 6  | 19  | 1.182 | 0.956 | 0.945 | 1.054 | 52.75  | 9.95  | 11 | 19  | 754  | 79.4  | 6.25 |
| Q8CAQ8-3 | Isoform 3 of Mitochondrial inner membrane protein OS=Mus musculus GN=Immt - [IMMT_MOUSE]                                        | 69.25 | 2 | 2  | 52 | 300 | 1.197 | 1.233 | 1.101 | 1.054 | 907.55 | 69.25 | 92 | 300 | 709  | 78.7  | 7.25 |
| D3Z0A5   | Protein lifeguard 3 (Fragment) OS=Mus musculus GN=Tmbim1 PE=2 SV=1 - [TMBIM1_MOUSE]                                             | 15.05 | 5 | 1  | 1  | 6   | 0.926 | 0.500 | 0.764 | 1.054 | 11.59  | 15.05 | 2  | 6   | 93   | 10.2  | 5.26 |
| F7ANC5   | Leucine-rich repeat and coiled-coil domain-containing protein 1 (Fragment) OS=Mus musculus GN=Lrrcc1 PE=2 SV=1 - [F7ANC5_MOUSE] | 3.61  | 9 | 1  | 3  | 7   | 2.168 | 1.003 | 0.838 | 1.054 | 13.37  | 3.61  | 4  | 7   | 581  | 68.6  | 6.20 |
| Q9D4C9   | Clavesin-1 OS=Mus musculus GN=Clvs1 PE=2 SV=1 - [CLVS1_MOUSE]                                                                   | 28.25 | 3 | 7  | 9  | 30  | 0.627 | 1.023 | 0.943 | 1.054 | 97.86  | 28.25 | 15 | 30  | 354  | 40.6  | 6.73 |
| Q9J110   | Serine/threonine-protein kinase 3 OS=Mus musculus GN=Sk3 PE=1 SV=1 - [STK3_MOUSE]                                               | 21.73 | 3 | 5  | 9  | 26  | 1.233 | 1.134 | 0.910 | 1.054 | 69.07  | 21.73 | 15 | 26  | 497  | 56.8  | 4.98 |
| Q8K363   | ATP-dependent RNA helicase DDX18 OS=Mus musculus GN=Ddx18 PE=2 SV=1 [DDX18_MOUSE]                                               | 3.94  | 1 | 2  | 2  | 2   | 0.441 | 0.874 | 0.753 | 1.054 | 2.70   | 3.94  | 2  | 2   | 660  | 74.1  | 9.52 |
| P97789-3 | Isoform 3 of 5'-3' exoribonuclease 1 OS=Mus musculus GN=Xm1 - [XENP1_MOUSE]                                                     | 7.53  | 4 | 10 | 10 | 23  | 0.741 | 1.064 | 1.121 | 1.055 | 69.40  | 7.53  | 17 | 23  | 1687 | 191.3 | 7.40 |
| D3Z2W1   | Protein Dgki OS=Mus musculus GN=Dgki PE=2 SV=1 - [D3Z2W1_MOUSE]                                                                 | 23.24 | 3 | 18 | 19 | 43  | 0.752 | 1.085 | 1.534 | 1.055 | 135.11 | 23.24 | 30 | 43  | 1050 | 115.9 | 7.85 |
| Q91WA6-2 | Isoform 2 of Sharpin OS=Mus musculus GN=Sharpin - [SHRPN_MOUSE]                                                                 | 7.54  | 2 | 2  | 2  | 7   | 0.957 | 1.607 | 0.999 | 1.055 | 12.51  | 7.54  | 3  | 7   | 305  | 31.8  | 5.41 |
| E9PUE6   | Transmembrane protein 145 OS=Mus musculus GN=Tmem145 PE=2 SV=1 - [E9PUE6_MOUSE]                                                 | 7.28  | 3 | 3  | 3  | 8   | 0.564 | 0.812 | 0.693 | 1.055 | 19.19  | 7.28  | 6  | 8   | 563  | 62.8  | 8.75 |
| Q8K1R7   | Serine/threonine-protein kinase Nek9 OS=Mus musculus GN=Nek9 PE=1 SV=2 - [NEK9_MOUSE]                                           | 12.70 | 1 | 9  | 9  | 13  | 1.423 | 1.264 | 1.112 | 1.055 | 36.86  | 12.70 | 13 | 13  | 984  | 107.1 | 5.63 |
| Q8R189   | Monocyte to macrophage differentiation factor 2 OS=Mus musculus GN=Mmd2 PE=2 SV=1 - [PAQRA_MOUSE]                               | 2.43  | 1 | 1  | 1  | 1   | 0.451 | 0.507 | 0.899 | 1.055 | 2.02   | 2.43  | 1  | 1   | 247  | 28.9  | 8.53 |
| E9Q8G5   | Protein A430033K04Rik OS=Mus musculus GN=A430033K04Rik PE=2 SV=1 - [E9Q8G5_MOUSE]                                               | 2.50  | 1 | 1  | 1  | 1   | 0.694 | 1.115 | 0.877 | 1.055 | 0.00   | 2.50  | 1  | 1   | 680  | 79.4  | 8.03 |
| Q3UMB9   | WASH complex subunit 7 OS=Mus musculus GN=Kiaa1033 PE=2 SV=2 [WASH7_MOUSE]                                                      | 17.05 | 1 | 20 | 21 | 53  | 0.599 | 0.920 | 0.864 | 1.055 | 149.88 | 17.05 | 37 | 53  | 1173 | 136.3 | 7.37 |
| Q8BME9   | Cerebellin-4 OS=Mus musculus GN=Cbln4 PE=1 SV=1 - [CBLN4_MOUSE]                                                                 | 17.68 | 1 | 3  | 3  | 10  | 1.548 | 0.663 | 0.892 | 1.055 | 27.56  | 17.68 | 6  | 10  | 198  | 21.6  | 8.73 |
| Q6NS82-3 | Isoform 3 of Protein FAM134A OS=Mus musculus GN=Fam134a - [F134A_MOUSE]                                                         | 13.89 | 3 | 4  | 4  | 11  | 1.001 | 1.202 | 1.030 | 1.055 | 25.46  | 13.89 | 5  | 11  | 504  | 53.8  | 4.49 |

|          |                                                                                                                                 |       |    |    |    |     |       |       |       |       |        |       |    |     |      |       |       |
|----------|---------------------------------------------------------------------------------------------------------------------------------|-------|----|----|----|-----|-------|-------|-------|-------|--------|-------|----|-----|------|-------|-------|
| P99025   | GTP cyclohydrolase 1 feedback regulatory protein OS=Mus musculus GN=Gchfr PE=1 SV=3 - [GFRP_MOUSE]                              | 20.24 | 1  | 1  | 1  | 7   | 2.303 | 0.693 | 0.862 | 1.055 | 16.03  | 20.24 | 2  | 7   | 84   | 9.6   | 6.27  |
| Q80UG2   | Plexin-A4 OS=Mus musculus GN=Plxna4 PE=1 SV=3 - [PLXA4_MOUSE]                                                                   | 33.97 | 1  | 38 | 56 | 211 | 0.709 | 0.874 | 0.957 | 1.055 | 615.38 | 33.97 | 97 | 211 | 1893 | 212.4 | 6.83  |
| Q5ICG5   | Long chain acyl-CoA synthetase 6 isoform 3 OS=Mus musculus GN=Acsl6 PE=2 SV=1 - [Q5ICG5_MOUSE]                                  | 47.06 | 9  | 1  | 31 | 162 | 1.097 | 1.011 | 0.989 | 1.055 | 477.94 | 47.06 | 57 | 162 | 697  | 77.9  | 7.24  |
| B0V2N1-6 | Isoform 6 of Receptor-type tyrosine-protein phosphatase 5 OS=Mus musculus GN=Ptpns - [PTPKS_MOUSE]                              | 34.12 | 4  | 5  | 44 | 193 | 0.880 | 0.649 | 1.192 | 1.055 | 622.23 | 34.12 | 80 | 193 | 1861 | 206.7 | 7.28  |
| Q8C547   | HEAT repeat-containing protein 5B OS=Mus musculus GN=Heatr5b PE=2 SV=3 -                                                        | 14.20 | 5  | 23 | 24 | 58  | 0.866 | 1.039 | 0.995 | 1.055 | 206.09 | 14.20 | 37 | 58  | 2070 | 224.2 | 7.14  |
| Q8VC88   | Grancalcin OS=Mus musculus GN=Gca PE=2 SV=1 - [GRAN_MOUSE]                                                                      | 3.18  | 1  | 1  | 1  | 1   | 1.048 | 1.316 | 0.839 | 1.055 | 1.94   | 3.18  | 1  | 1   | 220  | 24.6  | 5.07  |
| B9E121   | Zinc finger matrin type 3 OS=Mus musculus GN=Zmat3 PE=2 SV=1 - [B9E121_MOUSE]                                                   | 12.41 | 2  | 2  | 2  | 8   | 1.538 | 0.826 | 1.109 | 1.055 | 22.27  | 12.41 | 3  | 8   | 290  | 32.0  | 9.11  |
| F6W8F5   | Otoconin-90 (Fragment) OS=Mus musculus GN=Oc90 PE=3 SV=1 - [F6W8F5_MOUSE]                                                       | 7.27  | 9  | 1  | 1  | 1   | 1.402 | 1.048 | 0.997 | 1.055 | 2.44   | 7.27  | 1  | 1   | 220  | 23.5  | 5.26  |
| Q3U1U4   | Integrin alpha-11 OS=Mus musculus GN=Itgam PE=2 SV=1 - [Q3U1U4_MOUSE]                                                           | 13.39 | 10 | 11 | 13 | 31  | 1.057 | 1.202 | 1.129 | 1.056 | 98.72  | 13.39 | 19 | 31  | 1232 | 135.9 | 8.21  |
| Q62507   | Cochlin OS=Mus musculus GN=Coch PE=2 SV=2 - [COCH_MOUSE]                                                                        | 9.42  | 1  | 5  | 5  | 9   | 2.012 | 2.077 | 0.904 | 1.056 | 24.11  | 9.42  | 9  | 9   | 552  | 59.9  | 8.44  |
| Q60803   | TNF receptor-associated factor 3 OS=Mus musculus GN=Traf3 PE=1 SV=2 - [TRAF3_MOUSE]                                             | 42.50 | 4  | 3  | 25 | 97  | 1.085 | 0.686 | 0.732 | 1.056 | 294.18 | 42.50 | 40 | 97  | 567  | 64.3  | 8.05  |
| Q80WC3   | Trinucleotide repeat-containing gene 18 protein OS=Mus musculus GN=Tnrc18 PE=1 SV=2 - [TNC18_MOUSE]                             | 1.22  | 4  | 1  | 3  | 3   | 1.660 | 1.815 | 0.865 | 1.056 | 4.85   | 1.22  | 3  | 3   | 2878 | 307.4 | 8.40  |
| Q99J47   | Dehydrogenase/reductase SDR family member 7B OS=Mus musculus GN=Dhrs7b PE=2 SV=1 - [DRS7B_MOUSE]                                | 43.96 | 2  | 12 | 12 | 35  | 0.892 | 1.055 | 1.023 | 1.056 | 112.79 | 43.96 | 22 | 35  | 323  | 35.0  | 9.63  |
| D6RH67   | Transmembrane protein 62 OS=Mus musculus GN=Tmem62 PE=2 SV=1 - [D6RH67_MOUSE]                                                   | 22.82 | 3  | 5  | 5  | 9   | 1.233 | 1.023 | 1.049 | 1.056 | 26.97  | 22.82 | 8  | 9   | 333  | 37.3  | 8.95  |
| A2A1L3-2 | Isoform 2 of FGGY carbohydrate kinase domain-containing protein OS=Mus musculus GN=Fgy - [F6W8F5_MOUSE]                         | 6.20  | 6  | 2  | 2  | 4   | 1.719 | 1.119 | 0.930 | 1.056 | 13.55  | 6.20  | 4  | 4   | 387  | 42.3  | 6.57  |
| Q9JME5   | AP-3 complex subunit beta 2 OS=Mus musculus GN=Ap3b2 PE=1 SV=2 - [AP3B2_MOUSE]                                                  | 47.69 | 2  | 38 | 47 | 204 | 0.576 | 1.135 | 1.024 | 1.056 | 567.04 | 47.69 | 82 | 204 | 1082 | 119.1 | 5.63  |
| Q8CGY8   | UDP-N-acetylglucosamine-peptide N-acetylglucosaminyltransferase 110 kDa subunit OS=Mus musculus GN=Ogt PE=1 SV=2 - [OGT1_MOUSE] | 34.51 | 2  | 30 | 30 | 125 | 0.680 | 1.386 | 1.176 | 1.056 | 382.35 | 34.51 | 56 | 125 | 1046 | 116.9 | 6.70  |
| A2A891-2 | Isoform 2 of Calmodulin-binding transcription activator 1 OS=Mus musculus GN=Camta1 - [CMTA1_MOUSE]                             | 4.84  | 5  | 5  | 6  | 13  | 0.631 | 0.543 | 0.843 | 1.056 | 38.89  | 4.84  | 11 | 13  | 1675 | 183.4 | 7.71  |
| M0QW59   | Kinase suppressor of Ras 2 OS=Mus musculus GN=Ksr2 PE=4 SV=1 - [M0QW59_MOUSE]                                                   | 18.40 | 2  | 13 | 13 | 35  | 0.824 | 1.197 | 1.124 | 1.056 | 110.46 | 18.40 | 21 | 35  | 951  | 107.6 | 8.69  |
| Q6GV12   | 3-ketodihydrospingosine reductase OS=Mus musculus GN=Kdsr PE=2 SV=1 - [KDSR_MOUSE]                                              | 10.54 | 1  | 3  | 3  | 12  | 1.022 | 0.960 | 0.910 | 1.056 | 26.75  | 10.54 | 5  | 12  | 332  | 35.9  | 7.90  |
| F6Y616   | Polyadenylate-binding protein-interacting protein 1 OS=Mus musculus GN=Paip1 PE=2 SV=2 - [F6Y616_MOUSE]                         | 35.33 | 7  | 13 | 13 | 56  | 1.241 | 0.903 | 1.038 | 1.056 | 138.81 | 35.33 | 23 | 56  | 484  | 53.9  | 4.78  |
| Q9DCS3   | Trans-2-enoyl-CoA reductase, mitochondrial OS=Mus musculus GN=Mecr PE=2 SV=2 - [MECR_MOUSE]                                     | 54.42 | 2  | 12 | 13 | 52  | 0.765 | 0.919 | 1.115 | 1.056 | 143.06 | 54.42 | 21 | 52  | 373  | 40.3  | 9.07  |
| Q8BTG3   | T-complex protein 11-like protein 1 OS=Mus musculus GN=Top11l1 PE=2 SV=1 -                                                      | 29.67 | 1  | 12 | 12 | 32  | 0.839 | 1.244 | 0.839 | 1.056 | 99.82  | 29.67 | 20 | 32  | 509  | 56.3  | 5.50  |
| E9Q6W2   | Cytochrome c oxidase assembly protein 3 homolog, mitochondrial OS=Mus musculus GN=Coa3 PE=2 SV=1 - [COA3_MOUSE]                 | 33.33 | 2  | 4  | 4  | 14  | 0.698 | 0.940 | 0.924 | 1.056 | 43.31  | 33.33 | 7  | 14  | 90   | 9.8   | 11.44 |

|          |                                                                                                                                          |       |   |    |    |     |       |       |       |       |        |       |    |     |      |       |      |
|----------|------------------------------------------------------------------------------------------------------------------------------------------|-------|---|----|----|-----|-------|-------|-------|-------|--------|-------|----|-----|------|-------|------|
| 008582   | GTP-binding protein 1<br>OS=Mus musculus<br>GN=Gtbbp1 PE=1 SV=2 -<br>[GTPB1_MOUSE]                                                       | 32.34 | 1 | 18 | 18 | 58  | 0.715 | 0.931 | 1.198 | 1.056 | 171.36 | 32.34 | 33 | 58  | 668  | 72.3  | 8.29 |
| Q8C3S2-2 | Isoform 2 of Transport and<br>Golgi organization protein<br>6 homolog OS=Mus<br>musculus GN=Tango6 -<br>[TNG6_MOUSE]                     | 1.31  | 3 | 1  | 1  | 3   | 0.799 | 1.087 | 0.971 | 1.057 | 9.72   | 1.31  | 2  | 3   | 915  | 100.3 | 6.43 |
| Q9CXF4   | TBC1 domain family<br>member 15 OS=Mus<br>musculus GN=Tbc1d15<br>PE=1 SV=1 -                                                             | 17.88 | 1 | 10 | 11 | 35  | 1.094 | 1.042 | 1.030 | 1.057 | 94.65  | 17.88 | 19 | 35  | 671  | 76.5  | 5.30 |
| Q8R0S4   | Voltage-dependent L-type<br>calcium channel subunit<br>beta-4 OS=Mus musculus<br>GN=Cacnb4 PE=1 SV=2 -<br>[CACB4_MOUSE]                  | 41.43 | 4 | 12 | 17 | 76  | 0.689 | 0.747 | 1.448 | 1.057 | 229.10 | 41.43 | 30 | 76  | 519  | 57.9  | 9.28 |
| G3UXB6   | Sorting nexin-14 OS=Mus<br>musculus GN=Snx14 PE=2<br>SV=1 - [G3UXB6_MOUSE]                                                               | 8.91  | 5 | 8  | 8  | 23  | 0.698 | 0.902 | 0.946 | 1.057 | 51.06  | 8.91  | 12 | 23  | 920  | 106.4 | 6.99 |
| Q99K23   | Ufm1-specific protease 2<br>OS=Mus musculus<br>GN=Ufsp2 PE=1 SV=1 -<br>[UFSF2_MOUSE]                                                     | 23.64 | 1 | 10 | 10 | 30  | 1.025 | 0.847 | 0.887 | 1.057 | 92.52  | 23.64 | 17 | 30  | 461  | 52.5  | 6.76 |
| Q8R3F5   | Malonyl-CoA-acyl carrier<br>protein transacylase,<br>mitochondrial OS=Mus<br>musculus GN=Mcat PE=2<br>SV=3 - [FABD_MOUSE]                | 44.88 | 1 | 12 | 12 | 46  | 0.934 | 1.087 | 0.960 | 1.057 | 152.17 | 44.88 | 22 | 46  | 381  | 41.9  | 8.10 |
| Q9CPR0   | MCG3437 OS=Mus<br>musculus GN=Tpbpa PE=2<br>SV=1 - [Q9CPR0_MOUSE]                                                                        | 26.61 | 1 | 1  | 1  | 1   | 0.370 | 0.503 | 1.933 | 1.057 | 3.17   | 26.61 | 1  | 1   | 124  | 13.9  | 4.23 |
| Q7TMB8   | Cytoplasmic FMR1-<br>interacting protein 1<br>OS=Mus musculus<br>GN=Cyfp1 PE=1 SV=1 -<br>[CYFP1_MOUSE]                                   | 28.97 | 4 | 15 | 35 | 187 | 0.775 | 1.203 | 0.976 | 1.057 | 538.28 | 28.97 | 65 | 187 | 1253 | 145.1 | 6.90 |
| Q571E4   | N-acetylgalactosamine-6-<br>sulfatase OS=Mus<br>musculus GN=Galns PE=2<br>SV=2 - [GALNS_MOUSE]                                           | 24.23 | 1 | 10 | 11 | 24  | 2.015 | 1.123 | 0.903 | 1.057 | 48.25  | 24.23 | 19 | 24  | 520  | 57.6  | 6.52 |
| D3Z041   | Long-chain-fatty-acid-CoA<br>ligase 1 OS=Mus musculus<br>GN=Acs1 PE=2 SV=1 -<br>[D3Z041_MOUSE]                                           | 42.49 | 5 | 24 | 27 | 115 | 0.631 | 1.174 | 0.984 | 1.057 | 316.26 | 42.49 | 48 | 115 | 699  | 78.0  | 7.47 |
| Q8R071   | Inositol-trisphosphate 3-<br>kinase A OS=Mus<br>musculus GN=Itkpa PE=2<br>SV=1 - [IP3KA_MOUSE]                                           | 43.36 | 1 | 14 | 15 | 51  | 0.767 | 3.654 | 2.823 | 1.057 | 152.11 | 43.36 | 26 | 51  | 459  | 50.9  | 7.72 |
| Q5DTK1   | Chondroitin sulfate<br>synthase 3 OS=Mus<br>musculus GN=Chsy3 PE=1<br>SV=3 - [CHSS3_MOUSE]                                               | 2.26  | 2 | 2  | 3  | 6   | 1.529 | 0.742 | 0.772 | 1.057 | 10.77  | 2.26  | 4  | 6   | 884  | 100.0 | 8.38 |
| Q9D1H6   | NADH dehydrogenase<br>[ubiquinone] 1 alpha<br>subcomplex assembly<br>factor 4 OS=Mus musculus<br>GN=Ndufaf4 PE=2 SV=1 -<br>[NDUF4_MOUSE] | 36.99 | 3 | 7  | 8  | 22  | 0.987 | 0.823 | 1.089 | 1.057 | 50.34  | 36.99 | 12 | 22  | 173  | 20.1  | 9.39 |
| Q9D7X3   | Dual specificity protein<br>phosphatase 3 OS=Mus<br>musculus GN=Dusp3 PE=1<br>SV=1 - [DUS3_MOUSE]                                        | 60.00 | 5 | 8  | 8  | 43  | 1.202 | 0.952 | 1.131 | 1.057 | 159.80 | 60.00 | 15 | 43  | 185  | 20.5  | 6.54 |
| P35279-2 | Isoform 2 of Ras-related<br>protein Rab-6A OS=Mus<br>musculus GN=Rab6a -<br>[RAB6A_MOUSE]                                                | 56.25 | 2 | 6  | 12 | 121 | 0.830 | 0.910 | 0.946 | 1.057 | 330.13 | 56.25 | 20 | 121 | 208  | 23.5  | 5.54 |
| F7C3I9   | Afadin (Fragment)<br>OS=Mus musculus<br>GN=Milt4 PE=4 SV=1 -<br>[F7C3I9_MOUSE]                                                           | 39.44 | 1 | 1  | 10 | 48  | 1.513 | 1.542 | 1.734 | 1.057 | 141.25 | 39.44 | 17 | 48  | 355  | 41.4  | 5.06 |
| Q8VID5   | Protein Recq5 OS=Mus<br>musculus GN=Recq5<br>PE=2 SV=1 -<br>[Q8VID5_MOUSE]                                                               | 4.38  | 1 | 3  | 4  | 4   | 2.892 | 0.910 | 0.938 | 1.057 | 8.19   | 4.38  | 4  | 4   | 982  | 108.2 | 8.68 |
| P29595   | NEDD8 OS=Mus musculus<br>GN=Nedd8 PE=1 SV=2 -<br>[NEDD8_MOUSE]                                                                           | 43.21 | 1 | 3  | 4  | 146 | 2.033 | 1.103 | 1.275 | 1.057 | 300.27 | 43.21 | 7  | 146 | 81   | 9.0   | 7.25 |
| D3Z286   | Protein Tmppe OS=Mus<br>musculus GN=Tmppe<br>PE=4 SV=2 -<br>[D3Z286_MOUSE]                                                               | 13.87 | 1 | 4  | 4  | 14  | 0.821 | 0.938 | 1.007 | 1.057 | 40.11  | 13.87 | 8  | 14  | 447  | 49.4  | 6.89 |
| Q3UH06-2 | Isoform 2 of Ras-<br>responsive element-<br>binding protein 1 OS=Mus<br>musculus GN=Rreb1 -<br>[RREB1_MOUSE]                             | 3.83  | 5 | 3  | 3  | 3   | 3.569 | 0.838 | 0.568 | 1.057 | 8.12   | 3.83  | 3  | 3   | 1618 | 175.3 | 6.68 |
| Q8R4T1   | Cystin-1 OS=Mus<br>musculus GN=Cys1 PE=1<br>SV=1 - [CYS1_MOUSE]                                                                          | 22.07 | 2 | 2  | 2  | 7   | 2.080 | 1.513 | 1.149 | 1.058 | 29.19  | 22.07 | 4  | 7   | 145  | 15.5  | 5.25 |
| E9PUA3   | IQ motif and SEC7 domain-<br>containing protein 1<br>OS=Mus musculus<br>GN=Iqsec1 PE=2 SV=1 -<br>[E9PUA3_MOUSE]                          | 37.22 | 3 | 31 | 39 | 207 | 0.636 | 0.754 | 1.099 | 1.058 | 561.63 | 37.22 | 71 | 207 | 1099 | 122.6 | 8.47 |
| Q5EBH1   | Ras association domain-<br>containing protein 5<br>OS=Mus musculus<br>GN=Rassf5 PE=1 SV=1 -<br>[RASFS_MOUSE]                             | 8.23  | 3 | 3  | 4  | 20  | 0.989 | 0.633 | 0.725 | 1.058 | 43.96  | 8.23  | 7  | 20  | 413  | 46.7  | 9.28 |
| Q9WTP9   | Ventral anterior homeobox<br>2 OS=Mus musculus<br>GN=Vax2 PE=1 SV=1 -<br>[VAX2_MOUSE]                                                    | 17.81 | 4 | 3  | 3  | 3   | 0.854 | 1.013 | 0.932 | 1.058 | 5.25   | 17.81 | 3  | 3   | 292  | 31.7  | 9.74 |

|          |                                                                                                                        |       |   |    |    |      |       |       |       |       |         |       |    |      |      |       |       |
|----------|------------------------------------------------------------------------------------------------------------------------|-------|---|----|----|------|-------|-------|-------|-------|---------|-------|----|------|------|-------|-------|
| Q9EPRS   | VPS10 domain-containing receptor SorCS2 OS=Mus musculus GN=Sorcs2 PE=1 SV=2 - [SORC2_MOUSE]                            | 29.16 | 3 | 30 | 31 | 91   | 0.687 | 1.216 | 0.965 | 1.058 | 233.10  | 29.16 | 54 | 91   | 1159 | 128.8 | 7.34  |
| Q8K2Y9   | Malcavernin OS=Mus musculus GN=Ccm2 PE=1 SV=1 - [CCM2_MOUSE]                                                           | 20.09 | 6 | 7  | 7  | 23   | 1.198 | 1.088 | 1.433 | 1.058 | 79.93   | 20.09 | 14 | 23   | 453  | 49.9  | 5.62  |
| Q99N87   | 28S ribosomal protein S5, mitochondrial OS=Mus musculus GN=Mps5 PE=2 SV=1 - [RT05_MOUSE]                               | 20.14 | 2 | 9  | 9  | 21   | 0.793 | 0.772 | 1.036 | 1.058 | 57.70   | 20.14 | 15 | 21   | 432  | 48.2  | 10.14 |
| Q9Z0Z4-2 | Isoform 2 of Hephaestin OS=Mus musculus GN=Heph - [HEPH_MOUSE]                                                         | 15.48 | 3 | 14 | 14 | 34   | 0.934 | 0.570 | 0.798 | 1.058 | 113.55  | 15.48 | 21 | 34   | 1156 | 129.5 | 6.13  |
| Q3UPL5   | Uncharacterized protein C11orf96 homolog OS=Mus musculus GN=Ag2 PE=1 SV=2 - [CK096_MOUSE]                              | 3.61  | 1 | 1  | 1  | 4    | 1.554 | 0.700 | 1.381 | 1.058 | 11.81   | 3.61  | 2  | 4    | 249  | 27.1  | 10.89 |
| P47809   | Dual specificity mitogen-activated protein kinase kinase 4 OS=Mus musculus GN=Map2k4 PE=1 SV=2 - [MAP2K4_MOUSE]        | 59.45 | 5 | 17 | 17 | 61   | 0.720 | 1.051 | 0.980 | 1.058 | 180.17  | 59.45 | 28 | 61   | 397  | 44.1  | 8.07  |
| Q8CCP0   | Nuclear export mediator factor Nempf OS=Mus musculus GN=Nempf PE=1 SV=2 - [NEMF_MOUSE]                                 | 7.89  | 7 | 7  | 9  | 17   | 0.800 | 0.846 | 0.907 | 1.058 | 44.28   | 7.89  | 12 | 17   | 1064 | 121.1 | 6.80  |
| Q9CRY7   | Glycerophosphodiester phosphodiesterase domain-containing protein 1 OS=Mus musculus GN=Gdpd1 PE=2 SV=1 - [GDPD1_MOUSE] | 37.90 | 1 | 10 | 10 | 29   | 0.476 | 0.783 | 0.948 | 1.058 | 88.25   | 37.90 | 17 | 29   | 314  | 35.8  | 8.31  |
| P00493   | Hypoxanthine-guanine phosphoribosyltransferase OS=Mus musculus GN=Hprt1 PE=1 SV=3 - [HPRT_MOUSE]                       | 72.94 | 1 | 12 | 12 | 105  | 1.608 | 1.043 | 0.998 | 1.058 | 292.18  | 72.94 | 23 | 105  | 218  | 24.6  | 6.68  |
| Q2TBE6   | Phosphatidylinositol 4-kinase type 2-alpha OS=Mus musculus GN=P4k2a PE=1 SV=1 - [P4K2A_MOUSE]                          | 36.74 | 3 | 14 | 15 | 50   | 0.930 | 0.979 | 0.935 | 1.058 | 139.59  | 36.74 | 28 | 50   | 479  | 54.2  | 8.05  |
| Q99PP9-3 | Isoform 3 of Tripartite motif-containing protein 16 OS=Mus musculus GN=Trim16 [TRI16_MOUSE]                            | 2.56  | 5 | 1  | 1  | 2    | 2.242 | 1.123 | 1.516 | 1.058 | 2.56    | 2.56  | 1  | 2    | 469  | 54.0  | 6.57  |
| Q8R2T7   | Oxysterol-binding protein OS=Mus musculus GN=Osbp10 PE=2 SV=1 - [Q8R2T7_MOUSE]                                         | 17.77 | 1 | 6  | 8  | 17   | 1.176 | 1.126 | 1.068 | 1.058 | 53.06   | 17.77 | 13 | 17   | 591  | 65.8  | 7.39  |
| B2RQE8   | Rho GTPase-activating protein 42 OS=Mus musculus GN=Arhgap42 PE=2 SV=1 - [ARHAP42_MOUSE]                               | 2.14  | 1 | 1  | 2  | 3    | 0.814 | 0.811 | 1.012 | 1.058 | 6.70    | 2.14  | 3  | 3    | 841  | 94.6  | 8.00  |
| E9Q247   | SID1 transmembrane family member 1 OS=Mus musculus GN=Sidt1 PE=2 SV=1 - [E9Q247_MOUSE]                                 | 7.81  | 3 | 5  | 5  | 7    | 0.808 | 1.861 | 0.992 | 1.058 | 15.40   | 7.81  | 7  | 7    | 832  | 94.4  | 6.71  |
| Q6PNC0   | DmX-like protein 1 OS=Mus musculus GN=Dmx1 PE=1 SV=1 - [DMXL1_MOUSE]                                                   | 10.85 | 2 | 25 | 30 | 69   | 0.800 | 0.892 | 1.002 | 1.058 | 170.72  | 10.85 | 46 | 69   | 3013 | 335.8 | 6.42  |
| P58742   | Aladin OS=Mus musculus GN=Aaas PE=1 SV=1 - [AAAS_MOUSE]                                                                | 14.29 | 1 | 5  | 5  | 16   | 0.876 | 1.109 | 1.059 | 1.058 | 34.93   | 14.29 | 7  | 16   | 546  | 59.4  | 6.87  |
| Q8CI32   | BAG family molecular chaperone regulator 5 OS=Mus musculus GN=Bag5 PE=1 SV=1 - [BAG5_MOUSE]                            | 50.78 | 3 | 16 | 19 | 51   | 1.030 | 1.147 | 1.088 | 1.058 | 152.01  | 50.78 | 28 | 51   | 447  | 50.9  | 6.05  |
| P70207   | Plexin-A2 OS=Mus musculus GN=Plxna2 PE=1 SV=2 - [PLXA2_MOUSE]                                                          | 18.37 | 1 | 17 | 32 | 100  | 0.819 | 1.636 | 1.475 | 1.058 | 282.25  | 18.37 | 54 | 100  | 1894 | 211.4 | 6.54  |
| P63038   | 60 kDa heat shock protein, mitochondrial OS=Mus musculus GN=Hspd1 PE=1 SV=1 - [CH60_MOUSE]                             | 80.10 | 4 | 48 | 48 | 1124 | 1.233 | 1.008 | 1.035 | 1.059 | 3433.96 | 80.10 | 88 | 1124 | 573  | 60.9  | 6.18  |
| P97742   | Carnitine O-palmitoyltransferase 1, liver isoform OS=Mus musculus GN=Cpt1a PE=1 SV=4 - [CPT1A_MOUSE]                   | 24.58 | 1 | 14 | 14 | 32   | 0.862 | 0.870 | 0.795 | 1.059 | 87.58   | 24.58 | 23 | 32   | 773  | 88.2  | 8.62  |
| Q9CQ26   | STAM-binding protein OS=Mus musculus GN=Stampb PE=2 SV=1 - [STABP_MOUSE]                                               | 20.28 | 1 | 7  | 7  | 26   | 1.405 | 1.272 | 0.935 | 1.059 | 78.18   | 20.28 | 13 | 26   | 424  | 48.5  | 6.64  |
| Q5SVL6   | Rap1 GTPase-activating protein 2 OS=Mus musculus GN=Rap1gap2 PE=1 SV=1 - [RAP1_MOUSE]                                  | 50.28 | 3 | 24 | 26 | 99   | 0.834 | 1.254 | 1.306 | 1.059 | 300.45  | 50.28 | 45 | 99   | 712  | 78.2  | 6.43  |
| Q9CQN1   | Heat shock protein 75 kDa, mitochondrial OS=Mus musculus GN=Trap1 PE=1 SV=1 - [TRAP1_MOUSE]                            | 50.99 | 1 | 31 | 32 | 240  | 0.699 | 0.958 | 0.951 | 1.059 | 658.60  | 50.99 | 54 | 240  | 706  | 80.2  | 6.68  |
| F8VQC3   | Protein Sfin10-ps OS=Mus musculus GN=Sfin10-ps PE=4 SV=1 - [F8VQC3_MOUSE]                                              | 1.18  | 1 | 1  | 1  | 2    | 0.978 | 2.026 | 1.598 | 1.059 | 0.00    | 1.18  | 1  | 2    | 847  | 96.8  | 6.77  |

|        |                                                                                                       |       |   |    |    |     |       |       |       |       |        |       |    |     |      |       |      |
|--------|-------------------------------------------------------------------------------------------------------|-------|---|----|----|-----|-------|-------|-------|-------|--------|-------|----|-----|------|-------|------|
| P15532 | Nucleoside diphosphate kinase A OS=Mus musculus GN=Nme1 PE=1 SV=1 - [NDKA_MOUSE]                      | 83.55 | 3 | 3  | 13 | 172 | 1.452 | 1.236 | 0.928 | 1.059 | 495.30 | 83.55 | 23 | 172 | 152  | 17.2  | 7.37 |
| P01029 | Complement C4-B OS=Mus musculus GN=C4b PE=1 SV=3 - [CO4B_MOUSE]                                       | 10.70 | 2 | 16 | 16 | 34  | 3.037 | 1.554 | 0.703 | 1.059 | 78.79  | 10.70 | 27 | 34  | 1738 | 192.8 | 7.53 |
| Q8BTS4 | Nuclear pore complex protein Nup54 OS=Mus musculus GN=Nup54 PE=1 SV=1 - [NUP54_MOUSE]                 | 22.75 | 1 | 9  | 9  | 19  | 1.216 | 1.170 | 0.989 | 1.059 | 45.86  | 22.75 | 13 | 19  | 510  | 55.7  | 7.02 |
| Q91YS8 | Calcium/calmodulin-dependent protein kinase type 1 OS=Mus musculus GN=Camk1 PE=1 SV=1 - [KCC1A_MOUSE] | 53.21 | 2 | 11 | 15 | 88  | 1.065 | 1.271 | 0.923 | 1.059 | 295.48 | 53.21 | 28 | 88  | 374  | 41.6  | 5.35 |
| D3YV00 | Probable phospholipid-transporting ATPase IIB OS=Mus musculus GN=Atp9b PE=4 SV=1 - [D3YV00_MOUSE]     | 8.19  | 3 | 6  | 8  | 22  | 1.492 | 0.967 | 0.837 | 1.059 | 72.54  | 8.19  | 15 | 22  | 1135 | 127.9 | 7.64 |
| P59648 | FXD domain-containing ion transport regulator 7 OS=Mus musculus GN=Fxtd7 PE=1 SV=1 - [FXD7_MOUSE]     | 25.00 | 1 | 2  | 2  | 6   | 0.981 | 0.861 | 1.176 | 1.059 | 11.81  | 25.00 | 2  | 6   | 80   | 8.5   | 7.84 |
| Q6XQH0 | Galactose-3-O-sulfotransferase 2 OS=Mus musculus GN=Gal3st2 PE=2 SV=1 - [PRUNE_MOUSE]                 | 3.30  | 4 | 1  | 1  | 2   | 0.537 | 1.237 | 1.101 | 1.060 | 0.00   | 3.30  | 1  | 2   | 394  | 46.9  | 8.18 |
| Q8BIW1 | Protein prune homolog OS=Mus musculus GN=Prune PE=2 SV=1 - [PRUNE_MOUSE]                              | 45.37 | 1 | 17 | 17 | 116 | 0.794 | 1.028 | 0.964 | 1.060 | 320.24 | 45.37 | 29 | 116 | 454  | 50.2  | 5.11 |
| Q3UHL1 | CAM kinase-like vesicle-associated protein OS=Mus musculus GN=Camkv PE=1 SV=2 - [CAMKV_MOUSE]         | 40.43 | 1 | 18 | 19 | 117 | 0.425 | 1.612 | 1.554 | 1.060 | 343.85 | 40.43 | 37 | 117 | 512  | 54.8  | 5.54 |
| Q8BX94 | Oxysterol-binding protein-related protein 2 OS=Mus musculus GN=Osbp2 PE=2 SV=1 - [OSBL2_MOUSE]        | 17.36 | 1 | 6  | 9  | 27  | 0.936 | 0.936 | 0.902 | 1.060 | 66.08  | 17.36 | 15 | 27  | 484  | 55.3  | 6.20 |
| Q9Z0H7 | B-cell lymphoma/leukemia 10 OS=Mus musculus GN=Bcl10 PE=1 SV=1 - [BCL10_MOUSE]                        | 4.29  | 1 | 1  | 1  | 3   | 1.650 | 1.121 | 1.165 | 1.060 | 7.84   | 4.29  | 2  | 3   | 233  | 25.9  | 6.55 |
| E9PWG2 | Protein Trappc8 OS=Mus musculus GN=Trappc8 PE=2 SV=1 - [E9PWG2_MOUSE]                                 | 26.93 | 2 | 31 | 31 | 117 | 1.100 | 0.899 | 0.960 | 1.060 | 308.24 | 26.93 | 54 | 117 | 1437 | 160.8 | 7.01 |
| P59598 | Putative Polycomb group protein ASXL1 OS=Mus musculus GN=Asxl1 PE=1 SV=1 - [ASXL1_MOUSE]              | 2.64  | 1 | 2  | 2  | 3   | 2.259 | 1.445 | 1.041 | 1.060 | 5.24   | 2.64  | 2  | 3   | 1514 | 162.6 | 5.99 |
| O88851 | Putative hydrolase RBBP9 OS=Mus musculus GN=Rbbp9 PE=1 SV=2 - [RBBP9_MOUSE]                           | 58.60 | 1 | 8  | 8  | 25  | 0.802 | 0.869 | 0.952 | 1.060 | 73.42  | 58.60 | 13 | 25  | 186  | 20.9  | 5.97 |
| Q9DC48 | Pre-mRNA-processing factor 17 OS=Mus musculus GN=Cdc40 PE=1 SV=1 - [PRP17_MOUSE]                      | 1.38  | 1 | 1  | 1  | 1   | 0.841 | 0.708 | 0.933 | 1.060 | 2.83   | 1.38  | 1  | 1   | 579  | 65.4  | 7.06 |
| P63154 | Crooked neck-like protein 1 OS=Mus musculus GN=Cnmk1 PE=2 SV=1 - [CRNL1_MOUSE]                        | 9.28  | 2 | 6  | 6  | 12  | 0.305 | 0.960 | 0.987 | 1.060 | 34.35  | 9.28  | 11 | 12  | 690  | 83.4  | 6.93 |
| E9Q9X9 | Uncharacterized protein OS=Mus musculus GN=Gm3033 PE=4 SV=1 - [E9Q9X9_MOUSE]                          | 10.34 | 1 | 1  | 1  | 1   | 0.611 | 1.128 | 1.079 | 1.060 | 0.00   | 10.34 | 1  | 1   | 145  | 17.0  | 5.10 |
| Q8BH58 | TIP41-like protein OS=Mus musculus GN=Tipr1 PE=2 SV=1 - [TIPRL_MOUSE]                                 | 51.66 | 1 | 11 | 11 | 45  | 0.636 | 1.064 | 0.938 | 1.060 | 156.74 | 51.66 | 19 | 45  | 271  | 31.2  | 5.63 |
| Q3UGN9 | Signal transducing adapter molecule 1 OS=Mus musculus GN=Stam PE=2 SV=1 - [Q3UGN9_MOUSE]              | 50.00 | 3 | 15 | 17 | 84  | 1.378 | 1.118 | 1.182 | 1.060 | 264.12 | 50.00 | 30 | 84  | 462  | 51.1  | 4.87 |
| Q8BG92 | Clavesin-2 OS=Mus musculus GN=Clvs2 PE=2 SV=1 - [CLVS2_MOUSE]                                         | 31.19 | 2 | 5  | 8  | 40  | 0.744 | 1.115 | 0.892 | 1.060 | 134.46 | 31.19 | 14 | 40  | 327  | 37.9  | 6.20 |
| Q05915 | GTP cyclohydrolase 1 OS=Mus musculus GN=Gch1 PE=2 SV=1 - [GCH1_MOUSE]                                 | 20.33 | 1 | 5  | 5  | 7   | 1.518 | 1.354 | 1.280 | 1.060 | 12.00  | 20.33 | 7  | 7   | 241  | 27.0  | 8.27 |
| Q80T57 | Dendrin OS=Mus musculus GN=Ddn PE=1 SV=3 - [DEND_MOUSE]                                               | 7.04  | 1 | 4  | 4  | 6   | 0.680 | 2.622 | 2.421 | 1.060 | 15.47  | 7.04  | 6  | 6   | 710  | 76.4  | 9.98 |
| Q9CR98 | Protein FAM136A OS=Mus musculus GN=Fam136a PE=1 SV=1 - [F136A_MOUSE]                                  | 76.81 | 2 | 10 | 10 | 43  | 1.538 | 1.317 | 1.336 | 1.061 | 132.11 | 76.81 | 16 | 43  | 138  | 15.7  | 7.61 |
| Q9R0X4 | Acyl-coenzyme A thioesterase 9, mitochondrial OS=Mus musculus GN=Acot9 PE=1 SV=1 - [ACOT9_MOUSE]      | 45.33 | 2 | 19 | 19 | 96  | 0.650 | 0.788 | 0.911 | 1.061 | 290.99 | 45.33 | 36 | 96  | 439  | 50.5  | 8.59 |
| Q9WTX6 | Cullin-1 OS=Mus musculus GN=Cul1 PE=1 SV=1 - [CULL1_MOUSE]                                            | 38.02 | 3 | 28 | 28 | 96  | 0.756 | 0.886 | 0.975 | 1.061 | 249.17 | 38.02 | 47 | 96  | 776  | 89.6  | 8.00 |

|          |                                                                                                                  |       |    |    |    |     |       |       |       |       |         |       |    |     |      |       |      |
|----------|------------------------------------------------------------------------------------------------------------------|-------|----|----|----|-----|-------|-------|-------|-------|---------|-------|----|-----|------|-------|------|
| Q8C460-2 | Isoform 2 of ER11 exonibonuclease 3 OS=Mus musculus GN=Er13 - [ER13_MOUSE]                                       | 11.15 | 2  | 3  | 3  | 12  | 0.352 | 1.233 | 0.970 | 1.061 | 37.33   | 11.15 | 5  | 12  | 296  | 32.9  | 7.99 |
| Q60597   | 2-oxoglutarate dehydrogenase, mitochondrial OS=Mus musculus GN=Ogdh PE=1 SV=3 - [ODO1_MOUSE]                     | 55.52 | 6  | 41 | 49 | 429 | 0.754 | 0.790 | 0.960 | 1.061 | 1344.12 | 55.52 | 90 | 429 | 1023 | 116.4 | 6.83 |
| Q91YQ3   | Cold shock domain-containing protein C2 OS=Mus musculus GN=Csdc2 PE=2 SV=2 - [CSDC2_MOUSE]                       | 33.12 | 1  | 4  | 4  | 10  | 1.296 | 0.986 | 1.267 | 1.061 | 22.57   | 33.12 | 7  | 10  | 154  | 16.8  | 7.55 |
| AZAL55   | Protein Rap1gap OS=Mus musculus GN=Rap1gap PE=2 SV=1 - [AZAL55_MOUSE]                                            | 60.37 | 4  | 1  | 30 | 164 | 1.373 | 0.679 | 1.267 | 1.061 | 433.82  | 60.37 | 53 | 164 | 694  | 76.7  | 6.07 |
| Q8BM13   | Noelin-2 OS=Mus musculus GN=Ofnm2 PE=1 SV=2 - [NOE2_MOUSE]                                                       | 15.85 | 1  | 7  | 7  | 15  | 1.202 | 0.920 | 0.897 | 1.061 | 45.64   | 15.85 | 12 | 15  | 448  | 50.7  | 8.51 |
| AZAE7    | Cadherin EGF LAG seven-pass G-type receptor 2 OS=Mus musculus GN=Celsr2 PE=4 SV=1 - [AZAE7_MOUSE]                | 13.46 | 3  | 6  | 29 | 66  | 0.866 | 1.135 | 1.085 | 1.061 | 169.61  | 13.46 | 47 | 66  | 2919 | 316.8 | 5.47 |
| Q3UQ84   | Threonine--tRNA ligase, mitochondrial OS=Mus musculus GN=Tars2 PE=2 SV=1 - [SYTM_MOUSE]                          | 24.07 | 4  | 16 | 17 | 38  | 0.748 | 1.026 | 0.953 | 1.061 | 105.75  | 24.07 | 29 | 38  | 723  | 81.6  | 7.87 |
| Q8CIB5   | Fermitin family homolog 2 OS=Mus musculus GN=Fermt2 PE=1 SV=1 - [FERM2_MOUSE]                                    | 42.79 | 2  | 19 | 25 | 85  | 0.773 | 0.910 | 0.932 | 1.061 | 257.61  | 42.79 | 43 | 85  | 680  | 77.8  | 6.70 |
| Q91YL3   | Uridine-cytidine kinase-like 1 OS=Mus musculus GN=Uckl1 PE=1 SV=1 - [UCKL1_MOUSE]                                | 24.45 | 5  | 12 | 12 | 27  | 0.928 | 0.759 | 0.856 | 1.061 | 62.59   | 24.45 | 20 | 27  | 548  | 60.8  | 7.15 |
| P60766-1 | Isoform 1 of Cell division control protein 42 homolog OS=Mus musculus GN=Cdc42 - [CDC42_MOUSE]                   | 61.26 | 7  | 3  | 9  | 134 | 1.463 | 1.139 | 0.971 | 1.061 | 316.69  | 61.26 | 16 | 134 | 191  | 21.3  | 6.04 |
| Q8C804   | Spindle and centriole-associated protein 1 OS=Mus musculus GN=Spice1 PE=1 SV=2 - [SPICE_MOUSE]                   | 5.35  | 1  | 3  | 3  | 4   | 2.623 | 1.623 | 1.319 | 1.061 | 5.97    | 5.35  | 3  | 4   | 860  | 95.6  | 7.05 |
| Q91WT4   | DnaJ homolog subfamily C member 17 OS=Mus musculus GN=Dnajc17 PE=2 SV=2 -                                        | 16.50 | 1  | 3  | 4  | 6   | 0.825 | 1.069 | 1.062 | 1.061 | 14.21   | 16.50 | 5  | 6   | 303  | 34.4  | 8.57 |
| Q91Y17   | Protein Pcdha9 OS=Mus musculus GN=Pcdha2 PE=2 SV=1 - [Q91Y17_MOUSE]                                              | 5.59  | 4  | 1  | 4  | 8   | 8.445 | 2.267 | 1.494 | 1.061 | 21.09   | 5.59  | 6  | 8   | 948  | 102.2 | 5.05 |
| Q9DBC7   | cAMP-dependent protein kinase type I-alpha regulatory subunit OS=Mus musculus GN=Pkar1a PE=1 SV=3 - [PDKA_MOUSE] | 49.34 | 3  | 15 | 18 | 98  | 0.969 | 0.911 | 1.080 | 1.062 | 302.88  | 49.34 | 32 | 98  | 381  | 43.2  | 5.35 |
| Q9R0M4   | Podocalyxin OS=Mus musculus GN=Podxl PE=1 SV=2 - [PODXL_MOUSE]                                                   | 5.57  | 3  | 3  | 4  | 9   | 1.258 | 1.649 | 1.074 | 1.062 | 27.64   | 5.57  | 5  | 9   | 503  | 53.4  | 4.97 |
| Q99KR7   | Peptidyl-prolyl cis-trans isomerase F, mitochondrial OS=Mus musculus GN=Ppif PE=1 SV=1 - [PPIF_MOUSE]            | 52.43 | 1  | 9  | 11 | 60  | 1.765 | 0.744 | 1.253 | 1.062 | 178.86  | 52.43 | 19 | 60  | 206  | 21.7  | 9.16 |
| Q8BKCS   | Importin-5 OS=Mus musculus GN=Ipo5 PE=1 SV=3 - [IPO5_MOUSE]                                                      | 37.01 | 2  | 31 | 32 | 133 | 0.606 | 1.153 | 0.887 | 1.062 | 363.62  | 37.01 | 57 | 133 | 1097 | 123.5 | 4.93 |
| Q8C1B7-3 | Isoform 3 of Septin-11 OS=Mus musculus GN=Sept11 - [SEPT11_MOUSE]                                                | 49.18 | 4  | 10 | 22 | 248 | 0.926 | 1.365 | 1.340 | 1.062 | 643.49  | 49.18 | 38 | 248 | 425  | 48.9  | 6.81 |
| Q8C7R4   | Ubiquitin-like modifier-activating enzyme 6 OS=Mus musculus GN=Ubat5 PE=1 SV=1 - [UBA6_MOUSE]                    | 27.92 | 2  | 24 | 24 | 86  | 0.743 | 1.025 | 0.946 | 1.062 | 287.84  | 27.92 | 41 | 86  | 1053 | 117.9 | 6.11 |
| Q9WUC3   | Lymphocyte antigen 6H OS=Mus musculus GN=Ly6h PE=2 SV=2 - [LY6H_MOUSE]                                           | 56.83 | 2  | 7  | 7  | 69  | 0.754 | 1.438 | 0.923 | 1.062 | 187.36  | 56.83 | 12 | 69  | 139  | 14.7  | 7.53 |
| E9Q8V6   | Protein Dennd4a OS=Mus musculus GN=Dennd4a PE=4 SV=1 - [E9Q8V6_MOUSE]                                            | 9.42  | 1  | 13 | 14 | 26  | 0.797 | 0.754 | 1.011 | 1.062 | 62.48   | 9.42  | 19 | 26  | 1869 | 209.2 | 7.56 |
| D3Z1L0   | Transcription factor 7-like 2 (Fragment) OS=Mus musculus GN=Tcf7l2 PE=2 SV=1 - [D3Z1L0_MOUSE]                    | 8.30  | 18 | 2  | 2  | 3   | 1.341 | 0.865 | 0.884 | 1.062 | 9.45    | 8.30  | 2  | 3   | 265  | 29.6  | 9.31 |
| Q6P6M7   | O-phosphoseryl-HRNA(Sec) selenium transferase OS=Mus musculus GN=Sepssecs PE=1 SV=2 - [SPCS_MOUSE]               | 17.26 | 4  | 7  | 7  | 20  | 1.846 | 1.205 | 0.949 | 1.062 | 65.87   | 17.26 | 12 | 20  | 504  | 55.3  | 8.06 |
| P16406   | Glutamyl aminopeptidase OS=Mus musculus GN=Enpep PE=1 SV=1 - [AMPE_MOUSE]                                        | 10.37 | 3  | 9  | 9  | 17  | 0.939 | 1.242 | 1.007 | 1.062 | 49.35   | 10.37 | 14 | 17  | 945  | 107.9 | 5.44 |

|          |                                                                                                                                      |       |    |    |    |      |       |       |       |       |          |       |    |      |      |       |      |
|----------|--------------------------------------------------------------------------------------------------------------------------------------|-------|----|----|----|------|-------|-------|-------|-------|----------|-------|----|------|------|-------|------|
| Q8BZ64   | Tectonic-1 OS=Mus musculus GN=Tctn1 PE=1 SV=1 - [TECT1_MOUSE]                                                                        | 6.58  | 2  | 2  | 2  | 3    | 0.747 | 1.152 | 0.876 | 1.062 | 7.99     | 6.58  | 3  | 3    | 593  | 63.4  | 7.28 |
| Q9Z268   | RasGAP-activating-like protein 1 OS=Mus musculus GN=Rasa1 PE=2 SV=2 -                                                                | 42.55 | 5  | 32 | 32 | 115  | 0.510 | 2.394 | 1.169 | 1.062 | 355.76   | 42.55 | 57 | 115  | 799  | 89.3  | 6.37 |
| A2APT9   | Kelch domain-containing protein 7A OS=Mus musculus GN=Kihdc7a PE=2 SV=3 -                                                            | 15.91 | 1  | 6  | 7  | 13   | 1.451 | 0.905 | 1.428 | 1.062 | 27.89    | 15.91 | 10 | 13   | 773  | 83.5  | 6.33 |
| Q5EBG6   | Heat shock protein beta-6 OS=Mus musculus GN=Hspb6 PE=1 SV=1 - [HSPB6_MOUSE]                                                         | 8.02  | 1  | 1  | 1  | 2    | 2.582 | 1.631 | 1.056 | 1.062 | 6.02     | 8.02  | 2  | 2    | 162  | 17.5  | 6.00 |
| Q9DBX3   | Sushi domain-containing protein 2 OS=Mus musculus GN=Susd2 PE=1 SV=1 - [SUSD2_MOUSE]                                                 | 14.51 | 3  | 11 | 11 | 38   | 1.012 | 1.378 | 0.858 | 1.062 | 104.05   | 14.51 | 19 | 38   | 820  | 90.6  | 6.62 |
| Q61194-2 | Isoform 2 of Phosphatidylinositol 4-phosphate 3-kinase C2 domain-containing subunit alpha OS=Mus musculus GN=PIK3c2a - [P3C2A_MOUSE] | 7.66  | 3  | 10 | 10 | 17   | 1.750 | 0.784 | 1.016 | 1.062 | 53.56    | 7.66  | 17 | 17   | 1658 | 187.4 | 8.24 |
| Q80W68   | Kin of IRRF-like protein 1 OS=Mus musculus GN=Kirrel PE=1 SV=1 - [KIRRL_MOUSE]                                                       | 7.86  | 2  | 3  | 3  | 4    | 1.888 | 1.085 | 1.254 | 1.062 | 13.45    | 7.86  | 4  | 4    | 789  | 87.1  | 5.92 |
| D3Z5I9   | RNA-binding protein 33 OS=Mus musculus GN=Rbm33 PE=2 SV=1 - [D3Z5I9_MOUSE]                                                           | 2.10  | 2  | 2  | 2  | 6    | 1.768 | 1.117 | 1.003 | 1.063 | 20.99    | 2.10  | 4  | 6    | 1191 | 132.7 | 6.87 |
| Q9CZW5   | Mitochondrial import receptor subunit TOM70 OS=Mus musculus GN=Tom70a PE=1 SV=2 - [TOM70_MOUSE]                                      | 49.26 | 3  | 30 | 30 | 167  | 0.674 | 1.052 | 1.085 | 1.063 | 469.64   | 49.26 | 51 | 167  | 611  | 67.5  | 7.53 |
| Q91XX9   | Protein Pcdhgb6 OS=Mus musculus GN=Pcdhga9 PE=2 SV=1 - [Q91XX9_MOUSE]                                                                | 6.65  | 1  | 1  | 5  | 27   | 1.521 | 1.943 | 1.301 | 1.063 | 74.53    | 6.65  | 10 | 27   | 932  | 101.1 | 5.12 |
| F6TU77   | Protein Fam184a (Fragment) OS=Mus musculus GN=Fam184a PE=2 SV=1 -                                                                    | 19.04 | 4  | 15 | 18 | 39   | 1.656 | 1.173 | 1.129 | 1.063 | 105.02   | 19.04 | 29 | 39   | 1003 | 117.0 | 5.74 |
| Q6DIB5   | Multiple epidermal growth factor-like domains protein 10 OS=Mus musculus GN=Megf10 PE=1 SV=1 - [MEG10_MOUSE]                         | 4.45  | 1  | 5  | 5  | 11   | 1.992 | 1.070 | 1.266 | 1.063 | 31.83    | 4.45  | 8  | 11   | 1147 | 122.9 | 7.05 |
| Q8BKE9   | Intraflagellar transport protein 74 homolog OS=Mus musculus GN=Ifit74 PE=1 SV=2 - [IFT74_MOUSE]                                      | 33.33 | 2  | 16 | 17 | 45   | 1.576 | 1.127 | 0.994 | 1.063 | 139.52   | 33.33 | 27 | 45   | 600  | 69.3  | 6.00 |
| Q8K2B3   | Succinate dehydrogenase [ubiquinone] flavoprotein subunit, mitochondrial OS=Mus musculus GN=Sdh3 PE=1 SV=1 - [DHSA_MOUSE]            | 71.54 | 1  | 35 | 35 | 504  | 1.488 | 0.859 | 0.971 | 1.063 | 1761.39  | 71.54 | 66 | 504  | 664  | 72.5  | 7.37 |
| Q6P9N8   | Protein Trak2 OS=Mus musculus GN=Trak2 PE=2 SV=1 - [Q6P9N8_MOUSE]                                                                    | 6.46  | 2  | 4  | 4  | 6    | 1.053 | 1.100 | 1.538 | 1.063 | 14.67    | 6.46  | 5  | 6    | 913  | 101.2 | 5.16 |
| Q9CQ65   | S-methyl-5'-thioadenosine phosphorylase OS=Mus musculus GN=Mtap PE=2 SV=1 - [MTAP_MOUSE]                                             | 55.12 | 1  | 12 | 12 | 62   | 3.020 | 0.731 | 0.785 | 1.063 | 200.01   | 55.12 | 23 | 62   | 283  | 31.0  | 7.14 |
| D3YW7    | Protein Gm4297 OS=Mus musculus GN=Gm4297 PE=4 SV=1 - [D3YW7_MOUSE]                                                                   | 2.84  | 1  | 1  | 1  | 2    | 1.526 | 1.728 | 1.067 | 1.063 | 2.11     | 2.84  | 1  | 2    | 211  | 24.4  | 4.50 |
| Q99KR6   | E3 ubiquitin-protein ligase RNF34 OS=Mus musculus GN=Rnf34 PE=1 SV=1 - [RNF34_MOUSE]                                                 | 14.63 | 1  | 4  | 4  | 21   | 1.154 | 1.368 | 1.364 | 1.063 | 65.16    | 14.63 | 7  | 21   | 376  | 42.0  | 4.84 |
| Q8C190   | VPS9 domain-containing protein 1 OS=Mus musculus GN=Vps9d1 PE=2 SV=1 -                                                               | 18.18 | 3  | 3  | 8  | 17   | 1.251 | 1.461 | 1.045 | 1.063 | 47.41    | 18.18 | 13 | 17   | 649  | 71.2  | 6.87 |
| Q8R322   | Nucleoporin GLE1 OS=Mus musculus GN=Gle1 PE=2 SV=2 - [GLE1_MOUSE]                                                                    | 10.73 | 1  | 3  | 3  | 4    | 0.642 | 0.961 | 0.954 | 1.063 | 11.06    | 10.73 | 4  | 4    | 699  | 79.5  | 7.61 |
| Q0VE82   | Copine-7 OS=Mus musculus GN=Cpne7 PE=2 SV=1 - [CPNE7_MOUSE]                                                                          | 29.44 | 1  | 12 | 13 | 70   | 0.693 | 1.729 | 0.974 | 1.063 | 174.64   | 29.44 | 21 | 70   | 557  | 61.9  | 5.40 |
| Q3UVL4   | Vacuolar protein sorting-associated protein 51 homolog OS=Mus musculus GN=Vps51 PE=2 SV=2 - [VPS51_MOUSE]                            | 48.08 | 10 | 28 | 28 | 87   | 0.550 | 1.207 | 1.047 | 1.063 | 276.62   | 48.08 | 48 | 87   | 782  | 86.1  | 6.24 |
| Q7TMM9   | Tubulin beta-2A chain OS=Mus musculus GN=Tubb2a PE=1 SV=1 - [TBB2A_MOUSE]                                                            | 83.82 | 2  | 3  | 33 | 4988 | 0.731 | 1.309 | 1.106 | 1.063 | 13478.21 | 83.82 | 61 | 4988 | 445  | 49.9  | 4.89 |
| Q6PCM1   | Lysine-specific demethylase 3A OS=Mus musculus GN=Kdm3a PE=1 SV=1 -                                                                  | 1.13  | 1  | 1  | 1  | 1    | 0.742 | 0.962 | 1.044 | 1.063 | 2.46     | 1.13  | 1  | 1    | 1323 | 147.8 | 7.74 |

|        |                                                                                                                             |       |    |    |    |     |       |       |       |       |         |       |    |     |      |       |      |
|--------|-----------------------------------------------------------------------------------------------------------------------------|-------|----|----|----|-----|-------|-------|-------|-------|---------|-------|----|-----|------|-------|------|
| Q03963 | Interferon-induced, double-stranded RNA-activated protein kinase OS=Mus musculus GN=EIF2ak2 PE=1 SV=2 - [E2AK2_MOUSE]       | 11.84 | 1  | 4  | 5  | 9   | 0.983 | 1.168 | 0.793 | 1.063 | 34.25   | 11.84 | 8  | 9   | 515  | 58.2  | 8.57 |
| Q8K4K6 | Pantothenate kinase 1 OS=Mus musculus GN=Pank1 PE=1 SV=1 - [PANK1_MOUSE]                                                    | 11.50 | 2  | 3  | 5  | 10  | 1.275 | 1.127 | 1.200 | 1.063 | 21.93   | 11.50 | 8  | 10  | 548  | 60.1  | 8.03 |
| Q8CF89 | TGF-beta-activated kinase 1 and MAP3K7-binding protein 1 OS=Mus musculus GN=Tab1 PE=1 SV=2 - [TAB1_MOUSE]                   | 32.07 | 1  | 11 | 11 | 42  | 1.163 | 1.008 | 1.030 | 1.063 | 119.96  | 32.07 | 18 | 42  | 502  | 54.6  | 5.52 |
| Q8JZ50 | Protein lin-7 homolog A OS=Mus musculus GN=Lin7a PE=1 SV=2 - [LIN7A_MOUSE]                                                  | 52.79 | 3  | 6  | 12 | 98  | 0.663 | 1.653 | 1.417 | 1.063 | 231.29  | 52.79 | 22 | 98  | 233  | 26.0  | 8.72 |
| Q80TG9 | Leucine-rich repeat and fibronectin type-III domain containing protein 2 OS=Mus musculus GN=Lrnf2 PE=1 SV=2 - [LRNF2_MOUSE] | 9.52  | 1  | 5  | 5  | 8   | 1.066 | 1.397 | 0.872 | 1.064 | 26.16   | 9.52  | 7  | 8   | 788  | 84.9  | 6.74 |
| Q64151 | Semaforin-4c OS=Mus musculus GN=Sema4c PE=1 SV=1 - [SEMA4C_MOUSE]                                                           | 4.44  | 1  | 3  | 3  | 4   | 2.431 | 0.345 | 1.012 | 1.064 | 10.69   | 4.44  | 3  | 4   | 834  | 92.5  | 7.24 |
| Q9D1E8 | 1-acyl-sn-glycerol-3-phosphate acyltransferase epsilon OS=Mus musculus GN=Agpat5 PE=2 SV=2 - [PLCE_MOUSE]                   | 23.56 | 2  | 9  | 9  | 30  | 0.576 | 0.650 | 0.748 | 1.064 | 86.87   | 23.56 | 15 | 30  | 365  | 42.2  | 9.38 |
| Q3TE40 | DNA-directed RNA polymerase I subunit RPA2 OS=Mus musculus GN=Rpa2 PE=2 SV=1 - [Q3TE40_MOUSE]                               | 33.70 | 3  | 6  | 6  | 17  | 1.067 | 0.989 | 0.986 | 1.064 | 55.03   | 33.70 | 9  | 17  | 270  | 29.4  | 5.76 |
| Q9CPX6 | Ubiquitin-like-conjugating enzyme ATG3 OS=Mus musculus GN=Atg3 PE=1 SV=1 - [ATG3_MOUSE]                                     | 27.71 | 1  | 8  | 8  | 19  | 0.873 | 1.064 | 1.052 | 1.064 | 51.36   | 27.71 | 14 | 19  | 314  | 35.8  | 4.72 |
| O88888 | Amyloid beta A4 precursor protein-binding family A member 3 OS=Mus musculus GN=Apba3 PE=1 SV=1 - [APBA3_MOUSE]              | 3.68  | 1  | 2  | 2  | 4   | 1.516 | 0.854 | 0.946 | 1.064 | 11.86   | 3.68  | 3  | 4   | 571  | 60.7  | 5.08 |
| Q9CW07 | Protein phosphatase 1 regulatory subunit 3G OS=Mus musculus GN=Ppp1r3g PE=2 SV=2 - [PP13G_MOUSE]                            | 2.31  | 1  | 1  | 1  | 3   | 0.849 | 1.458 | 1.971 | 1.064 | 5.53    | 2.31  | 2  | 3   | 347  | 37.8  | 5.00 |
| E9Q1T1 | Calcium/calmodulin-dependent protein kinase type II subunit beta OS=Mus musculus GN=Camk2d PE=2 SV=1 - [CAMK2D_MOUSE]       | 49.72 | 13 | 3  | 26 | 382 | 0.728 | 1.540 | 1.128 | 1.064 | 1087.34 | 49.72 | 46 | 382 | 533  | 60.0  | 7.27 |
| P61021 | Ras-related protein Rab-5B OS=Mus musculus GN=Rab5b PE=1 SV=1 - [RABS5_MOUSE]                                               | 64.65 | 1  | 8  | 11 | 74  | 0.751 | 0.999 | 0.953 | 1.064 | 219.58  | 64.65 | 19 | 74  | 215  | 23.7  | 8.13 |
| Q4ACU6 | SH3 and multiple ankyrin repeat domains protein 3 OS=Mus musculus GN=Shank3 PE=1 SV=2 - [SHAN3_MOUSE]                       | 33.80 | 2  | 41 | 48 | 174 | 0.672 | 1.441 | 2.389 | 1.064 | 530.77  | 33.80 | 82 | 174 | 1805 | 192.1 | 8.90 |
| Q9EPL2 | Calsyntenin-1 OS=Mus musculus GN=Cstn1 PE=1 SV=1 - [CSTN1_MOUSE]                                                            | 25.23 | 1  | 1  | 23 | 77  | 1.038 | 0.720 | 1.778 | 1.064 | 242.25  | 25.23 | 39 | 77  | 979  | 108.8 | 4.92 |
| Q05BC8 | Nbr1 protein OS=Mus musculus GN=Nbr1 PE=2 SV=1 - [Q05BC8_MOUSE]                                                             | 3.27  | 7  | 3  | 3  | 4   | 1.202 | 1.242 | 1.111 | 1.064 | 8.31    | 3.27  | 4  | 4   | 888  | 98.8  | 4.88 |
| Q9DCU2 | Plasmolipin OS=Mus musculus GN=Pllp PE=2 SV=1 - [PLLIP_MOUSE]                                                               | 21.43 | 1  | 2  | 2  | 24  | 1.776 | 1.082 | 1.144 | 1.064 | 82.16   | 21.43 | 3  | 24  | 182  | 19.8  | 9.41 |
| P62838 | Ubiquitin-conjugating enzyme E2 D2 OS=Mus musculus GN=Ube2d2 PE=1 SV=1 - [UBE2D2_MOUSE]                                     | 28.57 | 2  | 3  | 4  | 32  | 0.495 | 1.044 | 0.976 | 1.064 | 100.29  | 28.57 | 7  | 32  | 147  | 16.7  | 7.83 |
| Q81110 | ATP synthase mitochondrial F1 complex assembly factor 1 OS=Mus musculus GN=Atpaf1 PE=2 SV=1 - [ATPAF1_MOUSE]                | 24.38 | 6  | 6  | 6  | 13  | 2.372 | 1.322 | 1.064 | 1.064 | 43.27   | 24.38 | 9  | 13  | 324  | 36.3  | 8.19 |
| Q9CPR1 | RWD domain-containing protein 4 OS=Mus musculus GN=Rwdd4 PE=2 SV=1 - [RWDD4_MOUSE]                                          | 18.62 | 3  | 4  | 4  | 12  | 1.332 | 0.844 | 1.121 | 1.064 | 29.77   | 18.62 | 7  | 12  | 188  | 21.1  | 5.63 |
| A2A690 | Protein TANC2 OS=Mus musculus GN=Tanc2 PE=1 SV=1 - [TANC2_MOUSE]                                                            | 23.37 | 4  | 33 | 34 | 131 | 0.908 | 1.002 | 1.275 | 1.064 | 373.01  | 23.37 | 60 | 131 | 1994 | 220.1 | 7.97 |
| Q8VD69 | Arrestin domain containing 4 OS=Mus musculus GN=Arnd4 PE=2 SV=1 - [Q8VD69_MOUSE]                                            | 12.84 | 1  | 2  | 2  | 2   | 0.980 | 1.112 | 1.159 | 1.064 | 6.81    | 12.84 | 2  | 2   | 296  | 31.6  | 8.10 |
| Q8BS95 | Golgi pH regulator OS=Mus musculus GN=Gpr9a PE=2 SV=2 - [GPHR_MOUSE]                                                        | 8.57  | 1  | 2  | 2  | 6   | 0.770 | 1.182 | 1.189 | 1.065 | 19.38   | 8.57  | 4  | 6   | 455  | 52.7  | 9.22 |
| E9QAQ3 | Rho GTPase-activating protein 26 OS=Mus musculus GN=Arhgap26 PE=2 SV=1 - [ARHAP26_MOUSE]                                    | 31.23 | 7  | 23 | 23 | 69  | 0.658 | 1.078 | 1.030 | 1.065 | 181.19  | 31.23 | 40 | 69  | 759  | 85.9  | 6.74 |



|          |                                                                                                                        |       |    |    |    |     |       |       |       |       |        |       |     |     |      |       |      |
|----------|------------------------------------------------------------------------------------------------------------------------|-------|----|----|----|-----|-------|-------|-------|-------|--------|-------|-----|-----|------|-------|------|
| B2RXA1   | Ploxd2 protein OS=Mus musculus GN=Ploxd2 PE=2 SV=1 - [B2RXA1_MOUSE]                                                    | 6.18  | 1  | 2  | 2  | 4   | 0.798 | 0.571 | 0.980 | 1.065 | 10.42  | 6.18  | 4   | 4   | 340  | 38.6  | 8.88 |
| Q91VZ6   | Stromal membrane-associated protein 1 OS=Mus musculus GN=Smap1 PE=1 SV=1 - [SMAPI_MOUSE]                               | 13.64 | 2  | 5  | 6  | 48  | 1.122 | 0.930 | 1.168 | 1.065 | 158.10 | 13.64 | 12  | 48  | 440  | 47.6  | 8.51 |
| Q80W47   | WD repeat domain phosphoinositide-interacting protein 2 OS=Mus musculus GN=Wipi2 PE=1 SV=1 - [WIP2_MOUSE]              | 34.61 | 2  | 10 | 11 | 55  | 1.251 | 1.109 | 1.127 | 1.065 | 168.92 | 34.61 | 18  | 55  | 445  | 48.4  | 5.86 |
| Q6PGF7   | Exocyst complex component 8 OS=Mus musculus GN=Exoc8 PE=1 SV=1 - [EXOC8_MOUSE]                                         | 45.53 | 1  | 30 | 30 | 90  | 0.844 | 1.366 | 1.062 | 1.065 | 243.06 | 45.53 | 49  | 90  | 716  | 81.0  | 5.40 |
| P19091   | Androgen receptor OS=Mus musculus GN=Ar PE=1 SV=1 - [ANDR_MOUSE]                                                       | 6.12  | 1  | 3  | 3  | 3   | 1.175 | 1.446 | 1.183 | 1.065 | 6.62   | 6.12  | 3   | 3   | 899  | 98.1  | 6.79 |
| Q8C561-2 | Isoform 2 of LMBR1 domain-containing protein 2 OS=Mus musculus GN=Lmbnd2 - [LMBD2_MOUSE]                               | 9.40  | 3  | 4  | 4  | 5   | 0.555 | 1.065 | 1.099 | 1.065 | 16.68  | 9.40  | 5   | 5   | 649  | 75.7  | 7.50 |
| E9Q3T3   | Protein Kif14 OS=Mus musculus GN=Kif14 PE=2 SV=1 - [E9Q3T3_MOUSE]                                                      | 1.66  | 2  | 2  | 3  | 4   | 1.938 | 0.987 | 0.878 | 1.065 | 10.58  | 1.66  | 4   | 4   | 1624 | 180.8 | 7.58 |
| Q9ET26   | RING finger protein 114 OS=Mus musculus GN=Rnf114 PE=2 SV=2 - [RNF114_MOUSE]                                           | 26.64 | 1  | 7  | 7  | 22  | 1.729 | 0.766 | 1.320 | 1.065 | 63.17  | 26.64 | 12  | 22  | 229  | 25.7  | 7.03 |
| Q923M0   | Protein phosphatase 1 regulatory subunit 16A OS=Mus musculus GN=Ppp1r16a PE=1 SV=1 - [PPP16A_MOUSE]                    | 10.31 | 2  | 6  | 6  | 15  | 1.156 | 0.808 | 1.190 | 1.065 | 38.68  | 10.31 | 11  | 15  | 524  | 57.5  | 5.81 |
| Q6PSU7   | Leucine-rich repeat and WD repeat-containing protein KIAA1239 OS=Mus musculus GN=Kiaa1239 PE=2 SV=2 - [KIAA1239_MOUSE] | 14.87 | 1  | 24 | 25 | 67  | 0.649 | 2.023 | 1.572 | 1.065 | 184.13 | 14.87 | 39  | 67  | 1742 | 197.3 | 6.15 |
| Q9CWZ7   | Gamma-soluble NSF attachment protein OS=Mus musculus GN=Napp PE=1 SV=1 - [SNAG_MOUSE]                                  | 62.18 | 2  | 17 | 19 | 203 | 1.148 | 1.384 | 1.253 | 1.065 | 595.36 | 62.18 | 34  | 203 | 312  | 34.7  | 5.41 |
| O89084   | cAMP-specific 3',5'-cyclic phosphodiesterase 4A OS=Mus musculus GN=Pde4a PE=2 SV=2 - [PDE4A_MOUSE]                     | 24.76 | 6  | 10 | 16 | 81  | 0.813 | 0.989 | 1.326 | 1.065 | 200.75 | 24.76 | 28  | 81  | 844  | 93.5  | 5.26 |
| Q3UDE2   | Tubulin-tyrosine ligase-like protein 12 OS=Mus musculus GN=Ttl12 PE=1 SV=1 - [TTL12_MOUSE]                             | 28.48 | 2  | 13 | 13 | 56  | 0.940 | 0.971 | 0.934 | 1.065 | 177.01 | 28.48 | 25  | 56  | 639  | 74.0  | 5.63 |
| Q8K1E0   | Syntaxin-5 OS=Mus musculus GN=Stx5 PE=1 SV=3 - [STX5_MOUSE]                                                            | 41.97 | 11 | 10 | 10 | 18  | 0.741 | 0.803 | 0.850 | 1.065 | 55.28  | 41.97 | 17  | 18  | 355  | 39.7  | 8.92 |
| A2A4B4   | EMILIN-3 OS=Mus musculus GN=Emilin3 PE=2 SV=1 - [A2A4B4_MOUSE]                                                         | 3.23  | 2  | 2  | 2  | 3   | 2.638 | 3.487 | 0.507 | 1.065 | 4.98   | 3.23  | 2   | 3   | 711  | 77.3  | 6.74 |
| P42932   | T-complex protein 1 subunit theta OS=Mus musculus GN=Cct8 PE=1 SV=3 - [TCPQ_MOUSE]                                     | 80.84 | 6  | 37 | 37 | 249 | 0.702 | 1.012 | 0.866 | 1.065 | 757.93 | 80.84 | 69  | 249 | 548  | 59.5  | 5.62 |
| F2Z3X6   | 3-phosphoinositide-dependent protein kinase 1 OS=Mus musculus GN=Pdk1 PE=2 SV=1 - [F2Z3X6_MOUSE]                       | 42.67 | 8  | 19 | 19 | 61  | 0.726 | 0.921 | 0.974 | 1.065 | 183.38 | 42.67 | 31  | 61  | 532  | 60.9  | 7.39 |
| G3UYR1   | Protein Rgs22 (Fragment) OS=Mus musculus GN=Rgs22 PE=2 SV=1 - [G3UYR1_MOUSE]                                           | 1.23  | 3  | 1  | 2  | 2   | 0.794 | 1.073 | 1.321 | 1.066 | 5.15   | 1.23  | 2   | 2   | 1134 | 131.2 | 8.51 |
| Q9CZY3   | Ubiquitin-conjugating enzyme E2 variant 1 OS=Mus musculus GN=Ube2v1 PE=1 SV=1 - [UB2V1_MOUSE]                          | 69.39 | 6  | 5  | 10 | 59  | 0.892 | 1.058 | 1.060 | 1.066 | 155.75 | 69.39 | 15  | 59  | 147  | 16.3  | 7.96 |
| Q64727   | Vinculin OS=Mus musculus GN=Vcl PE=1 SV=4 - [VINCL_MOUSE]                                                              | 60.13 | 1  | 59 | 60 | 333 | 1.048 | 1.682 | 0.956 | 1.066 | 919.14 | 60.13 | 101 | 333 | 1066 | 116.6 | 6.00 |
| Q69ZQ1   | Uncharacterized family 31 glucosidase KIAA1161 OS=Mus musculus GN=Kiaa1161 PE=1 SV=2 - [K1161_MOUSE]                   | 8.24  | 1  | 5  | 5  | 8   | 0.890 | 0.754 | 1.015 | 1.066 | 20.44  | 8.24  | 8   | 8   | 716  | 81.3  | 8.29 |
| P55065   | Phospholipid transfer protein OS=Mus musculus GN=Pltp PE=1 SV=1 - [PLTP_MOUSE]                                         | 8.11  | 4  | 3  | 3  | 4   | 1.313 | 1.312 | 0.870 | 1.066 | 5.84   | 8.11  | 3   | 4   | 493  | 54.4  | 6.62 |
| Q8K203   | Endonuclease 8-like 3 OS=Mus musculus GN=Neil3 PE=1 SV=1 - [NEIL3_MOUSE]                                               | 8.42  | 4  | 4  | 4  | 8   | 1.633 | 1.976 | 0.787 | 1.066 | 11.02  | 8.42  | 5   | 8   | 606  | 67.4  | 9.01 |
| E9Q8I7   | Protein Nfx1 OS=Mus musculus GN=Nfx1 PE=2 SV=1 - [E9Q8I7_MOUSE]                                                        | 6.43  | 3  | 5  | 6  | 12  | 1.609 | 1.243 | 1.065 | 1.066 | 32.55  | 6.43  | 8   | 12  | 918  | 101.4 | 8.40 |
| G5E8E0   | Regulator of G-protein signaling 17, isoform CRA_b OS=Mus musculus GN=Rgs17 PE=4 SV=1 - [G5E8E0_MOUSE]                 | 33.04 | 3  | 6  | 7  | 22  | 1.871 | 1.395 | 1.060 | 1.066 | 59.95  | 33.04 | 11  | 22  | 230  | 26.6  | 6.01 |

|          |                                                                                                                                                  |       |    |    |    |     |       |       |       |       |        |       |    |     |      |       |       |
|----------|--------------------------------------------------------------------------------------------------------------------------------------------------|-------|----|----|----|-----|-------|-------|-------|-------|--------|-------|----|-----|------|-------|-------|
| Q8R5J9   | PRA1 family protein 3<br>OS=Mus musculus<br>GN=Arliip5 PE=1 SV=2 -<br>[PRAF3_MOUSE]                                                              | 27.66 | 1  | 6  | 6  | 40  | 0.692 | 1.102 | 1.067 | 1.066 | 123.35 | 27.66 | 10 | 40  | 188  | 21.5  | 9.61  |
| P22723   | Gamma-aminobutyric acid<br>receptor subunit gamma-2<br>OS=Mus musculus<br>GN=Gabrg2 PE=1 SV=3 -<br>[GBRG2_MOUSE]                                 | 19.62 | 4  | 7  | 9  | 23  | 1.094 | 0.822 | 1.061 | 1.066 | 59.31  | 19.62 | 14 | 23  | 474  | 55.1  | 8.66  |
| E9Q0A7   | Oxidation resistance<br>protein 1 OS=Mus<br>musculus GN=Oxr1 PE=2<br>SV=1 - [E9Q0A7_MOUSE]                                                       | 48.20 | 2  | 2  | 32 | 193 | 1.376 | 0.708 | 1.288 | 1.066 | 581.62 | 48.20 | 57 | 193 | 832  | 91.7  | 5.07  |
| Q9WUU7   | Cathepsin Z OS=Mus<br>musculus GN=CtSz PE=2<br>SV=1 - [CATZ_MOUSE]                                                                               | 15.03 | 1  | 4  | 4  | 31  | 1.778 | 1.165 | 1.014 | 1.066 | 72.02  | 15.03 | 8  | 31  | 306  | 34.0  | 6.60  |
| A2AJ10   | MAP7 domain-containing<br>protein 1 OS=Mus<br>musculus GN=Map7d1<br>PE=1 SV=1 -                                                                  | 28.61 | 3  | 1  | 22 | 78  | 1.363 | 0.788 | 1.014 | 1.066 | 167.13 | 28.61 | 35 | 78  | 846  | 93.2  | 10.15 |
| Q8BGR8   | GSK3-beta interaction<br>protein OS=Mus musculus<br>GN=Gskip PE=2 SV=1 -<br>[GSKIP_MOUSE]                                                        | 37.41 | 2  | 3  | 3  | 12  | 1.802 | 1.024 | 1.212 | 1.066 | 37.49  | 37.41 | 5  | 12  | 139  | 15.6  | 4.41  |
| Q3UFS0   | Protein zyg-11 homolog B<br>OS=Mus musculus<br>GN=Zyg11b PE=2 SV=2 -<br>[ZY11B_MOUSE]                                                            | 26.48 | 3  | 14 | 14 | 32  | 0.743 | 1.016 | 0.925 | 1.066 | 96.62  | 26.48 | 22 | 32  | 744  | 83.9  | 6.87  |
| P33175   | Kinesin heavy chain<br>isoform 5A OS=Mus<br>musculus GN=Kif5a PE=1<br>SV=3 - [KIF5A_MOUSE]                                                       | 35.93 | 1  | 24 | 35 | 161 | 1.227 | 0.594 | 1.049 | 1.066 | 427.88 | 35.93 | 63 | 161 | 1027 | 116.9 | 5.94  |
| Q8C8N3   | Brorin OS=Mus musculus<br>GN=Vwc2 PE=1 SV=1 -<br>[VWC2_MOUSE]                                                                                    | 4.63  | 1  | 1  | 1  | 1   | 1.464 | 1.236 | 1.341 | 1.066 | 4.74   | 4.63  | 1  | 1   | 324  | 35.4  | 5.38  |
| Q4PNJ2   | Sodium/potassium-<br>transporting ATPase<br>subunit beta-1-interacting<br>protein 2 OS=Mus<br>musculus GN=Nkain2<br>PE=1 SV=2 -<br>[NKAI2_MOUSE] | 6.25  | 1  | 1  | 1  | 3   | 0.800 | 1.168 | 1.139 | 1.066 | 6.76   | 6.25  | 2  | 3   | 208  | 23.9  | 5.07  |
| Q9CPP6   | NADH dehydrogenase<br>[ubiquinone] 1 alpha<br>subcomplex subunit 5<br>OS=Mus musculus<br>GN=Nduif5 PE=1 SV=3 -<br>[NDUIF5_MOUSE]                 | 75.00 | 2  | 10 | 10 | 72  | 1.126 | 0.992 | 1.037 | 1.067 | 206.35 | 75.00 | 17 | 72  | 116  | 13.4  | 8.10  |
| Q7TSH2   | Phosphorylase b kinase<br>regulatory subunit beta<br>OS=Mus musculus<br>GN=Phkb PE=1 SV=1 -<br>[KPBB_MOUSE]                                      | 19.08 | 5  | 17 | 17 | 47  | 0.711 | 0.937 | 0.993 | 1.067 | 137.17 | 19.08 | 29 | 47  | 1085 | 123.8 | 6.83  |
| Q99LG2   | Transportin-2 OS=Mus<br>musculus GN=Trpo2 PE=2<br>SV=1 - [TNPO2_MOUSE]                                                                           | 17.47 | 2  | 7  | 13 | 32  | 0.519 | 1.130 | 1.001 | 1.067 | 88.56  | 17.47 | 22 | 32  | 887  | 100.4 | 4.98  |
| A2BGJ8   | Peptidyl-prolyl cis-trans<br>isomerase H (Fragment)<br>OS=Mus musculus<br>GN=Pjih PE=2 SV=1 -<br>[A2BGJ8_MOUSE]                                  | 62.03 | 4  | 9  | 10 | 93  | 1.172 | 1.406 | 0.989 | 1.067 | 214.21 | 62.03 | 16 | 93  | 158  | 17.2  | 8.34  |
| P61028   | Ras-related protein Rab-8B<br>OS=Mus musculus<br>GN=Rab8b PE=1 SV=1 -<br>[RAB8B_MOUSE]                                                           | 59.90 | 1  | 6  | 16 | 137 | 0.964 | 1.164 | 0.889 | 1.067 | 379.21 | 59.90 | 27 | 137 | 207  | 23.6  | 9.07  |
| P70170-3 | Isoform SUR2C of ATP-<br>binding cassette sub-<br>family C member 9<br>OS=Mus musculus<br>GN=Abcc9 -<br>[ABCC9_MOUSE]                            | 3.51  | 8  | 2  | 4  | 6   | 0.510 | 1.170 | 1.258 | 1.067 | 7.29   | 3.51  | 5  | 6   | 1511 | 170.0 | 7.24  |
| Q99MR3   | Solute carrier family 12<br>member 9 OS=Mus<br>musculus GN=Slc12a9<br>PE=1 SV=2 -                                                                | 16.08 | 1  | 11 | 11 | 32  | 0.791 | 0.883 | 1.001 | 1.067 | 100.53 | 16.08 | 18 | 32  | 914  | 96.3  | 7.02  |
| Q9D8Y1   | Transmembrane protein<br>126A OS=Mus musculus<br>GN=Tmem126a PE=2<br>SV=1 - [T126A_MOUSE]                                                        | 19.90 | 2  | 4  | 4  | 21  | 0.735 | 0.987 | 0.891 | 1.067 | 53.85  | 19.90 | 8  | 21  | 196  | 21.5  | 9.41  |
| A6H6A9-3 | Isoform 3 of Rab GTPase-<br>activating protein 1-like<br>OS=Mus musculus<br>GN=Rabgap1 -                                                         | 37.84 | 2  | 11 | 15 | 50  | 1.157 | 1.135 | 1.100 | 1.067 | 123.95 | 37.84 | 25 | 50  | 370  | 42.7  | 7.33  |
| Q80W82   | JNK3 alpha1 protein kinase<br>OS=Mus musculus<br>GN=Mapk10 PE=2 SV=1 -<br>[Q80W82_MOUSE]                                                         | 48.10 | 15 | 7  | 17 | 77  | 0.930 | 1.155 | 1.210 | 1.067 | 222.07 | 48.10 | 30 | 77  | 422  | 48.5  | 7.69  |
| Q9JKP5   | Muscleblind-like protein 1<br>OS=Mus musculus<br>GN=Mbl1 PE=1 SV=1 -<br>[MBNL1_MOUSE]                                                            | 14.37 | 5  | 2  | 6  | 22  | 0.946 | 0.553 | 0.829 | 1.067 | 49.09  | 14.37 | 10 | 22  | 341  | 37.0  | 8.60  |
| P83741-2 | Isoform 2 of<br>Serine/threonine-protein<br>kinase WNK1 OS=Mus<br>musculus GN=Wnk1 -<br>[WNK1_MOUSE]                                             | 16.07 | 12 | 30 | 37 | 132 | 1.390 | 0.670 | 1.275 | 1.067 | 370.66 | 16.07 | 65 | 132 | 2626 | 279.0 | 6.61  |
| Q3TYA4   | Syntaxin-binding protein 6<br>OS=Mus musculus<br>GN=Sbxp6 PE=2 SV=1 -<br>[Q3TYA4_MOUSE]                                                          | 50.00 | 4  | 10 | 10 | 35  | 0.765 | 0.783 | 1.073 | 1.067 | 95.26  | 50.00 | 19 | 35  | 210  | 23.7  | 9.19  |
| Q03147   | Cyclin-dependent kinase 7<br>OS=Mus musculus<br>GN=Cdk7 PE=1 SV=2 -<br>[CDK7_MOUSE]                                                              | 5.49  | 1  | 2  | 2  | 4   | 0.862 | 0.969 | 1.089 | 1.067 | 9.63   | 5.49  | 3  | 4   | 346  | 38.9  | 8.47  |
| P62806   | Histone H4 OS=Mus<br>musculus GN=Hist1h4a<br>PE=1 SV=2 - [H4_MOUSE]                                                                              | 61.17 | 1  | 10 | 10 | 337 | 0.504 | 0.790 | 0.787 | 1.067 | 886.68 | 61.17 | 18 | 337 | 103  | 11.4  | 11.36 |

|          |                                                                                                                                       |       |    |    |     |      |       |       |       |       |          |       |     |      |      |       |      |
|----------|---------------------------------------------------------------------------------------------------------------------------------------|-------|----|----|-----|------|-------|-------|-------|-------|----------|-------|-----|------|------|-------|------|
| Q8BG22   | Calcium-activated chloride channel regulator 2<br>OS=Mus musculus<br>GN=Cla2 PE=2 SV=1 - [CLCA2_MOUSE]                                | 1.27  | 2  | 2  | 2   | 2    | 0.544 | 0.932 | 0.773 | 1.067 | 3.76     | 1.27  | 2   | 2    | 942  | 103.6 | 6.19 |
| O54916   | RalBP1-associated Eps domain-containing protein 1<br>OS=Mus musculus<br>GN=Reps1 PE=1 SV=2 - [REPS1_MOUSE]                            | 30.57 | 10 | 19 | 21  | 64   | 1.408 | 1.109 | 1.183 | 1.067 | 190.81   | 30.57 | 36  | 64   | 795  | 86.5  | 5.58 |
| Q9WTR1   | Transient receptor potential cation channel subfamily V member 2<br>OS=Mus musculus<br>GN=Tpv2 PE=1 SV=2 - [TPV2_MOUSE]               | 19.18 | 1  | 13 | 13  | 36   | 1.001 | 1.097 | 1.008 | 1.068 | 105.94   | 19.18 | 21  | 36   | 756  | 85.9  | 6.99 |
| D3YY16   | Glia maturation factor gamma<br>OS=Mus musculus<br>GN=Gmfg PE=2 SV=1 - [D3YY16_MOUSE]                                                 | 48.51 | 3  | 2  | 4   | 14   | 1.691 | 1.744 | 0.992 | 1.068 | 44.56    | 48.51 | 6   | 14   | 101  | 11.9  | 5.24 |
| P63011   | Ras-related protein Rab-3A<br>OS=Mus musculus<br>GN=Rab3a PE=1 SV=1 - [RAB3A_MOUSE]                                                   | 57.27 | 2  | 4  | 12  | 298  | 0.702 | 1.286 | 1.199 | 1.068 | 877.52   | 57.27 | 23  | 298  | 220  | 25.0  | 5.03 |
| O88704   | Potassium/sodium hyperpolarization-activated cyclic nucleotide-gated channel 1<br>OS=Mus musculus<br>GN=Hcn1 PE=1 SV=1 - [HCN1_MOUSE] | 23.30 | 1  | 12 | 20  | 155  | 1.263 | 0.900 | 1.224 | 1.068 | 370.33   | 23.30 | 37  | 155  | 910  | 102.4 | 8.37 |
| Q3UHD2   | Glucose-fructose oxidoreductase domain-containing protein 1<br>OS=Mus musculus<br>GN=Gfo1 PE=2 SV=1 - [GFO1_MOUSE]                    | 22.82 | 1  | 7  | 8   | 19   | 0.832 | 1.198 | 1.112 | 1.068 | 53.68    | 22.82 | 13  | 19   | 390  | 43.3  | 5.92 |
| P11983   | T-complex protein 1 subunit alpha<br>OS=Mus musculus<br>GN=Tcp1 PE=1 SV=3 - [TCPA_MOUSE]                                              | 63.67 | 3  | 28 | 28  | 161  | 0.673 | 0.948 | 0.913 | 1.068 | 505.30   | 63.67 | 52  | 161  | 556  | 60.4  | 6.16 |
| Q6PDY2   | 2-aminoethanethiol dioxygenase<br>OS=Mus musculus<br>GN=Ado PE=1 SV=2 - [AEDO_MOUSE]                                                  | 64.45 | 1  | 15 | 15  | 69   | 0.989 | 0.699 | 0.989 | 1.068 | 186.27   | 64.45 | 26  | 69   | 256  | 28.4  | 5.97 |
| Q91WG5   | 5'-AMP-activated protein kinase subunit gamma-2<br>OS=Mus musculus<br>GN=Prkag2 PE=1 SV=2 - [AAKG2_MOUSE]                             | 23.14 | 4  | 9  | 11  | 25   | 0.653 | 1.351 | 1.170 | 1.068 | 69.39    | 23.14 | 20  | 25   | 566  | 62.9  | 9.36 |
| Q6P616   | DNA-directed RNA polymerase II subunit GRINL1A<br>OS=Mus musculus<br>GN=Polr2m PE=2 SV=2 - [POLR2M_MOUSE]                             | 10.66 | 4  | 3  | 3   | 10   | 1.597 | 1.428 | 1.201 | 1.068 | 27.39    | 10.66 | 6   | 10   | 366  | 41.2  | 6.55 |
| Q8BG58   | Transmembrane prolyl 4-hydroxylase<br>OS=Mus musculus<br>GN=P4htm PE=2 SV=1 - [P4HTM_MOUSE]                                           | 11.93 | 2  | 4  | 4   | 9    | 0.934 | 1.163 | 0.979 | 1.068 | 21.95    | 11.93 | 5   | 9    | 503  | 57.0  | 6.09 |
| P21614   | Vitamin D-binding protein<br>OS=Mus musculus<br>GN=Gc PE=1 SV=2 - [VTDB_MOUSE]                                                        | 49.79 | 1  | 18 | 19  | 63   | 2.963 | 1.981 | 0.719 | 1.068 | 218.58   | 49.79 | 31  | 63   | 476  | 53.6  | 5.50 |
| P35831   | Tyrosine-protein phosphatase non-receptor type 12<br>OS=Mus musculus<br>GN=Ptpn12 PE=1 SV=3 - [PTN12_MOUSE]                           | 18.32 | 1  | 10 | 10  | 20   | 1.126 | 1.273 | 1.222 | 1.068 | 62.59    | 18.32 | 16  | 20   | 775  | 86.5  | 5.99 |
| P80314   | T-complex protein 1 subunit beta<br>OS=Mus musculus<br>GN=Cct2 PE=1 SV=4 - [TCPB_MOUSE]                                               | 74.39 | 1  | 33 | 33  | 310  | 0.873 | 1.102 | 0.902 | 1.068 | 997.30   | 74.39 | 63  | 310  | 535  | 57.4  | 6.40 |
| Q62178   | Semaphorin-4A<br>OS=Mus musculus<br>GN=Sema4a PE=1 SV=2 - [SEM4A_MOUSE]                                                               | 23.68 | 6  | 16 | 17  | 46   | 0.736 | 0.874 | 0.865 | 1.068 | 112.57   | 23.68 | 30  | 46   | 760  | 83.4  | 7.72 |
| P16546   | Spectrin alpha chain, non-erythrocytic 1<br>OS=Mus musculus<br>GN=Sptan1 PE=1 SV=4 - [SPTN1_MOUSE]                                    | 77.18 | 5  | 2  | 206 | 3711 | 1.300 | 1.170 | 1.236 | 1.068 | 10872.33 | 77.18 | 377 | 3711 | 2472 | 284.4 | 5.33 |
| Q0VF22   | Coiled-coil domain-containing protein 138<br>OS=Mus musculus<br>GN=Ccdc138 PE=2 SV=1 - [CC138_MOUSE]                                  | 1.47  | 1  | 1  | 1   | 1    | 2.639 | 0.980 | 1.141 | 1.068 | 3.24     | 1.47  | 1   | 1    | 680  | 77.9  | 8.16 |
| Q9JH15   | Isovaleryl-CoA dehydrogenase, mitochondrial<br>OS=Mus musculus<br>GN=lvd PE=1 SV=1 - [IVD_MOUSE]                                      | 54.95 | 1  | 19 | 19  | 109  | 1.507 | 1.043 | 0.759 | 1.068 | 325.62   | 54.95 | 34  | 109  | 424  | 46.3  | 8.29 |
| Q3U108-3 | Isoform 3 of AT-rich interactive domain-containing protein 5A<br>OS=Mus musculus<br>GN=Arid5a - [ARID5A_MOUSE]                        | 2.05  | 1  | 1  | 1   | 1    | 2.008 | 1.159 | 1.200 | 1.068 | 3.73     | 2.05  | 1   | 1    | 684  | 73.3  | 8.76 |
| P61080   | Ubiquitin-conjugating enzyme E2 D1<br>OS=Mus musculus<br>GN=Ube2d1 PE=2 SV=1 - [UBE2D1_MOUSE]                                         | 24.49 | 2  | 2  | 3   | 24   | 0.924 | 0.906 | 1.084 | 1.068 | 82.46    | 24.49 | 6   | 24   | 147  | 16.6  | 7.42 |
| Q8BKQ3   | Testican-1<br>OS=Mus musculus<br>GN=Spock1 PE=2 SV=1 - [Q8BKQ3_MOUSE]                                                                 | 18.45 | 2  | 6  | 8   | 15   | 1.548 | 0.919 | 1.553 | 1.068 | 44.80    | 18.45 | 13  | 15   | 439  | 49.2  | 6.01 |
| Q8BXZ8   | Putative methyltransferase NSUN6<br>OS=Mus musculus<br>GN=Nsun6 PE=4 SV=1 - [Q8BXZ8_MOUSE]                                            | 21.74 | 2  | 2  | 2   | 5    | 1.506 | 1.192 | 1.084 | 1.068 | 15.12    | 21.74 | 2   | 5    | 115  | 13.3  | 6.93 |

|          |                                                                                                                                                  |       |   |    |    |     |       |       |       |       |         |       |     |     |      |       |      |
|----------|--------------------------------------------------------------------------------------------------------------------------------------------------|-------|---|----|----|-----|-------|-------|-------|-------|---------|-------|-----|-----|------|-------|------|
| Q9JLB2   | MAGUK p55 subfamily member 5 OS=Mus musculus GN=Mpp5 PE=1 SV=1 - [MPP5_MOUSE]                                                                    | 29.04 | 1 | 14 | 15 | 30  | 0.853 | 0.816 | 0.999 | 1.068 | 78.69   | 29.04 | 25  | 30  | 675  | 77.2  | 6.09 |
| Q8VIM9   | Immunity-related GTPase family Q protein OS=Mus musculus GN=Irgq PE=2 SV=1 - [IRGQ_MOUSE]                                                        | 26.93 | 1 | 13 | 13 | 53  | 1.020 | 0.956 | 1.023 | 1.068 | 144.45  | 26.93 | 21  | 53  | 583  | 59.3  | 4.83 |
| Q69ZF3   | Non-lysosomal glucosylceramidase OS=Mus musculus GN=Gba2 PE=1 SV=2 - [Gba2_MOUSE]                                                                | 16.67 | 2 | 9  | 9  | 48  | 0.727 | 1.112 | 0.996 | 1.068 | 156.26  | 16.67 | 16  | 48  | 918  | 103.2 | 5.59 |
| Q9JL26-2 | Isoform 2 of Formin-like protein 1 OS=Mus musculus GN=Fmn1 - [FMINL_MOUSE]                                                                       | 23.97 | 3 | 16 | 24 | 66  | 0.646 | 1.192 | 1.107 | 1.068 | 166.91  | 23.97 | 42  | 66  | 1064 | 119.0 | 5.66 |
| F7DB83   | Protein Ahnak2 (Fragment) OS=Mus musculus GN=Ahnak2 PE=2 SV=1 - [Ahnak2_MOUSE]                                                                   | 28.43 | 2 | 10 | 20 | 58  | 3.109 | 0.876 | 1.068 | 1.069 | 167.74  | 28.43 | 34  | 58  | 1576 | 166.4 | 5.78 |
| E9PYG6   | Protein Ras1 OS=Mus musculus GN=Rasa1 PE=2 SV=1 - [E9PYG6_MOUSE]                                                                                 | 11.75 | 1 | 11 | 11 | 38  | 0.900 | 1.191 | 0.889 | 1.069 | 101.85  | 11.75 | 19  | 38  | 1038 | 115.4 | 6.60 |
| D3YW20   | Protein 9030624J02Rik (Fragment) OS=Mus musculus GN=9030624J02Rik PE=2 SV=2 - [D3YW20_MOUSE]                                                     | 17.73 | 8 | 15 | 15 | 34  | 0.915 | 1.057 | 0.905 | 1.069 | 88.61   | 17.73 | 25  | 34  | 874  | 98.9  | 7.08 |
| P61164   | Alpha-centractin OS=Mus musculus GN=Actr1a PE=2 SV=1 - [ACTZ_MOUSE]                                                                              | 55.59 | 1 | 9  | 17 | 110 | 0.654 | 0.835 | 0.970 | 1.069 | 368.43  | 55.59 | 31  | 110 | 376  | 42.6  | 6.64 |
| P01831   | Thy-1 membrane glycoprotein OS=Mus musculus GN=Thy1 PE=1 SV=1 - [THY1_MOUSE]                                                                     | 50.00 | 1 | 8  | 8  | 237 | 1.222 | 1.111 | 1.310 | 1.069 | 711.32  | 50.00 | 13  | 237 | 162  | 18.1  | 8.97 |
| O54950   | 5'-AMP-activated protein kinase subunit gamma-1 OS=Mus musculus GN=Prkg1 PE=1 SV=2 - [AAKG1_MOUSE]                                               | 23.94 | 1 | 5  | 7  | 25  | 0.808 | 1.146 | 1.127 | 1.069 | 67.03   | 23.94 | 13  | 25  | 330  | 37.5  | 7.14 |
| P16627   | Heat shock 70 kDa protein 1-like OS=Mus musculus GN=Hspa11 PE=2 SV=4 - [H571L_MOUSE]                                                             | 35.10 | 1 | 4  | 24 | 428 | 1.241 | 1.156 | 0.980 | 1.069 | 1092.58 | 35.10 | 42  | 428 | 641  | 70.6  | 6.24 |
| P97300   | Neuroplastin OS=Mus musculus GN=Nptn PE=1 SV=3 - [NPTN_MOUSE]                                                                                    | 36.27 | 5 | 7  | 17 | 252 | 0.390 | 2.680 | 2.476 | 1.069 | 691.42  | 36.27 | 31  | 252 | 397  | 44.3  | 7.74 |
| Q5SV30   | Calcium/calmodulin-dependent protein kinase II, beta, isoform CRA_b OS=Mus musculus GN=Camk2b PE=4 SV=1 - [Q5SVJ0_MOUSE]                         | 58.11 | 4 | 19 | 31 | 623 | 0.631 | 0.965 | 1.277 | 1.069 | 1862.52 | 58.11 | 55  | 623 | 666  | 72.9  | 7.27 |
| D3YV57   | Uncharacterized protein (Fragment) OS=Mus musculus GN=Cystm1 PE=2 SV=1 - [Cystm1_MOUSE]                                                          | 11.90 | 2 | 1  | 1  | 11  | 1.553 | 0.869 | 1.150 | 1.069 | 34.36   | 11.90 | 2   | 11  | 84   | 9.2   | 4.44 |
| Q99N15   | 17beta-hydroxysteroid dehydrogenase type 10/short chain L-3-hydroxyacyl-CoA dehydrogenase OS=Mus musculus GN=Hsd17b10 PE=2 SV=1 - [Q99N15_MOUSE] | 76.25 | 3 | 13 | 13 | 73  | 0.851 | 0.954 | 0.977 | 1.069 | 234.50  | 76.25 | 24  | 73  | 261  | 27.3  | 8.76 |
| Q8CSP7   | Testis development-related protein OS=Mus musculus GN=Tdrp PE=2 SV=1 - [TDRP_MOUSE]                                                              | 34.07 | 2 | 4  | 4  | 16  | 2.093 | 0.747 | 1.488 | 1.069 | 53.56   | 34.07 | 7   | 16  | 182  | 20.2  | 5.73 |
| Q8VHK1   | Caskin-2 OS=Mus musculus GN=Caskin2 PE=1 SV=3 - [CSK12_MOUSE]                                                                                    | 18.82 | 2 | 10 | 15 | 48  | 1.604 | 0.963 | 1.099 | 1.069 | 125.92  | 18.82 | 26  | 48  | 1201 | 126.7 | 7.39 |
| Q7TMS5   | ATP-binding cassette sub-family G member 2 OS=Mus musculus GN=Abcg2 PE=2 SV=1 - [ABCG2_MOUSE]                                                    | 8.37  | 3 | 4  | 5  | 24  | 0.643 | 1.106 | 0.998 | 1.069 | 79.91   | 8.37  | 9   | 24  | 657  | 72.9  | 8.54 |
| E9Q179   | G-rich sequence factor 1 OS=Mus musculus GN=Grsf1 PE=2 SV=1 - [E9Q179_MOUSE]                                                                     | 21.55 | 4 | 7  | 7  | 29  | 1.364 | 0.704 | 1.027 | 1.069 | 89.29   | 21.55 | 14  | 29  | 362  | 41.6  | 5.33 |
| Q9JKC6   | Cell cycle exit and neuronal differentiation protein 1 OS=Mus musculus GN=Cend1 PE=1 SV=1 - [CEND_MOUSE]                                         | 71.14 | 1 | 14 | 14 | 164 | 0.784 | 0.707 | 1.031 | 1.069 | 286.85  | 71.14 | 24  | 164 | 149  | 15.0  | 8.97 |
| Q4FE56   | Ubiquitin carboxyl-terminal hydrolase OS=Mus musculus GN=Usp9x PE=2 SV=1 - [Q4FE56_MOUSE]                                                        | 27.17 | 8 | 44 | 63 | 254 | 0.625 | 1.069 | 0.883 | 1.069 | 697.58  | 27.17 | 115 | 254 | 2554 | 290.0 | 5.83 |
| F8WGW3   | S1 RNA-binding domain-containing protein 1 OS=Mus musculus GN=Srb1 PE=2 SV=1 - [F8WGW3_MOUSE]                                                    | 4.49  | 3 | 3  | 4  | 5   | 1.353 | 0.872 | 0.944 | 1.069 | 11.27   | 4.49  | 5   | 5   | 981  | 110.1 | 8.78 |
| Q3U0P5   | Ectonucleoside triphosphate diphosphohydrolase 6, isoform CRA_a OS=Mus musculus GN=Entpd6 PE=2 SV=1 - [Q3U0P5_MOUSE]                             | 11.21 | 1 | 4  | 4  | 19  | 0.718 | 1.135 | 0.928 | 1.069 | 49.52   | 11.21 | 8   | 19  | 455  | 49.8  | 8.62 |
| Q3TY60-2 | Isoform 2 of Protein FAM131B OS=Mus musculus GN=Fam131b - [F131B_MOUSE]                                                                          | 22.70 | 3 | 8  | 8  | 39  | 0.778 | 1.229 | 1.523 | 1.069 | 105.91  | 22.70 | 14  | 39  | 348  | 37.5  | 4.48 |

|          |                                                                                                                                       |       |   |    |    |     |       |       |       |       |         |       |     |     |      |       |       |
|----------|---------------------------------------------------------------------------------------------------------------------------------------|-------|---|----|----|-----|-------|-------|-------|-------|---------|-------|-----|-----|------|-------|-------|
| D3YVU0   | Ubiquitin carboxyl-terminal hydrolase 46 OS=Mus musculus GN=Usp46 PE=2 SV=1 - [D3YVU0_MOUSE]                                          | 22.12 | 5 | 7  | 7  | 20  | 0.966 | 1.292 | 1.125 | 1.070 | 66.14   | 22.12 | 11  | 20  | 339  | 39.5  | 7.36  |
| Q3TQF0   | F-box only protein 31 OS=Mus musculus GN=Fbxg31 PE=1 SV=1 - [FBX31_MOUSE]                                                             | 7.89  | 1 | 2  | 2  | 3   | 0.712 | 1.598 | 0.985 | 1.070 | 5.77    | 7.89  | 2   | 3   | 507  | 57.2  | 6.98  |
| Q80TJ1-4 | Isoform 4 of Calcium-dependent secretion activator 1 OS=Mus musculus GN=Cadps - [CAPS1_MOUSE]                                         | 51.67 | 4 | 1  | 58 | 411 | 0.633 | 0.696 | 0.990 | 1.070 | 1231.70 | 51.67 | 101 | 411 | 1351 | 152.6 | 5.74  |
| B9EHT4   | CAP-Gly domain-containing linker protein 3 OS=Mus musculus GN=Clip3 PE=1 SV=1 - [CLIP3_MOUSE]                                         | 36.01 | 2 | 17 | 17 | 42  | 0.784 | 0.680 | 1.096 | 1.070 | 115.74  | 36.01 | 27  | 42  | 547  | 59.5  | 7.94  |
| Q8K2I5   | LYR motif-containing protein 4 OS=Mus musculus GN=Lym4 PE=2 SV=1 - [LYRM4_MOUSE]                                                      | 56.04 | 1 | 5  | 6  | 20  | 1.101 | 0.973 | 0.953 | 1.070 | 46.27   | 56.04 | 9   | 20  | 91   | 10.8  | 10.13 |
| Q9Z211   | Peroxisomal membrane protein 11A OS=Mus musculus GN=Pex11a PE=2 SV=1 -                                                                | 7.32  | 1 | 2  | 3  | 4   | 1.339 | 1.049 | 1.344 | 1.070 | 8.73    | 7.32  | 4   | 4   | 246  | 28.1  | 9.83  |
| Q8R2Y8   | Peptidyl-RNA hydrolase 2, mitochondrial OS=Mus musculus GN=Pth2 PE=2 SV=1 - [PTH2_MOUSE]                                              | 38.12 | 1 | 5  | 5  | 19  | 0.938 | 1.032 | 0.941 | 1.070 | 59.31   | 38.12 | 8   | 19  | 181  | 19.5  | 7.42  |
| Q6P1F6   | Serine/threonine-protein phosphatase 2A 55 kDa regulatory subunit B alpha isoform OS=Mus musculus GN=Ppp2r2a PE=1 SV=1 - [ZABA_MOUSE] | 48.32 | 2 | 12 | 20 | 93  | 0.842 | 0.954 | 1.230 | 1.070 | 264.19  | 48.32 | 36  | 93  | 447  | 51.7  | 6.20  |
| P05627   | Transcription factor AP-1 OS=Mus musculus GN=Jun PE=1 SV=3 - [JUN_MOUSE]                                                              | 10.48 | 2 | 2  | 3  | 4   | 0.763 | 1.065 | 0.917 | 1.070 | 11.49   | 10.48 | 4   | 4   | 334  | 35.9  | 8.75  |
| O88990   | Alpha-actinin-3 OS=Mus musculus GN=Actn3 PE=2 SV=1 - [ACTN3_MOUSE]                                                                    | 18.89 | 3 | 3  | 17 | 76  | 1.468 | 0.639 | 1.329 | 1.070 | 186.59  | 18.89 | 29  | 76  | 900  | 103.0 | 5.45  |
| O89116   | Vesicle transport through interaction with t-SNAREs homolog 1A OS=Mus musculus GN=Vti1a PE=1 SV=1 - [VTI1A_MOUSE]                     | 19.82 | 3 | 6  | 6  | 19  | 1.024 | 1.432 | 1.324 | 1.070 | 56.71   | 19.82 | 11  | 19  | 217  | 25.0  | 6.40  |
| P37040   | NADPH-cytochrome P450 reductase OS=Mus musculus GN=Por PE=1 SV=2 - [NCPR_MOUSE]                                                       | 45.72 | 5 | 24 | 24 | 101 | 0.732 | 1.136 | 0.901 | 1.070 | 325.56  | 45.72 | 41  | 101 | 678  | 77.0  | 5.53  |
| Q9E556   | Trafficking protein particle complex subunit 4 OS=Mus musculus GN=Trappc4 PE=1 SV=1 - [TPPC4_MOUSE]                                   | 30.14 | 1 | 6  | 6  | 15  | 1.060 | 1.119 | 0.953 | 1.070 | 40.01   | 30.14 | 10  | 15  | 219  | 24.4  | 6.21  |
| Q7TMY8-3 | Isoform 3 of E3 ubiquitin-protein ligase HUWE1 OS=Mus musculus GN=Huwe1 -                                                             | 23.27 | 7 | 74 | 74 | 249 | 0.794 | 0.963 | 1.055 | 1.070 | 724.90  | 23.27 | 123 | 249 | 4362 | 480.6 | 5.20  |
| Q9Z1W8   | Potassium-transporting ATPase alpha chain 2 OS=Mus musculus GN=Atp12a PE=1 SV=3 - [AT12A_MOUSE]                                       | 8.99  | 1 | 2  | 11 | 575 | 0.969 | 0.679 | 1.455 | 1.070 | 1331.11 | 8.99  | 19  | 575 | 1035 | 114.7 | 6.33  |
| A2A9F7   | GNP-loop GTPase 2 OS=Mus musculus GN=Gpn2 PE=2 SV=1 - [A2A9F7_MOUSE]                                                                  | 14.63 | 2 | 2  | 2  | 4   | 0.540 | 1.382 | 0.933 | 1.070 | 17.93   | 14.63 | 3   | 4   | 287  | 31.8  | 4.93  |
| Q0VBM2   | Protein FAM83B OS=Mus musculus GN=Fam83b PE=1 SV=1 - [FAM83B_MOUSE]                                                                   | 2.67  | 1 | 2  | 2  | 4   | 1.361 | 0.978 | 1.125 | 1.070 | 5.86    | 2.67  | 2   | 4   | 1012 | 114.6 | 9.11  |
| Q8BGR6   | ADP-ribosylation factor-like protein 15 OS=Mus musculus GN=Arl15 PE=2 SV=1 - [ARL15_MOUSE]                                            | 22.06 | 1 | 4  | 4  | 13  | 0.615 | 1.180 | 1.138 | 1.070 | 39.39   | 22.06 | 7   | 13  | 204  | 22.9  | 5.29  |
| Q9R0D8   | WD repeat-containing protein 54 OS=Mus musculus GN=Wdr54 PE=2 SV=1 -                                                                  | 47.90 | 2 | 9  | 9  | 37  | 1.999 | 1.220 | 1.096 | 1.070 | 154.90  | 47.90 | 16  | 37  | 334  | 35.6  | 6.21  |
| Q6P9Z1   | SWI/SNF-related matrix-associated actin-dependent regulator of chromatin subfamily D member 3 OS=Mus musculus GN=Smarca3 PE=1 SV=2 -  | 18.84 | 1 | 5  | 7  | 20  | 0.646 | 0.863 | 0.757 | 1.070 | 40.55   | 18.84 | 10  | 20  | 483  | 55.0  | 9.35  |
| Q5NCM5   | Epsin-2 OS=Mus musculus GN=Epn2 PE=2 SV=1 - [Q5NCM5_MOUSE]                                                                            | 33.12 | 5 | 1  | 16 | 182 | 1.234 | 1.380 | 1.865 | 1.070 | 512.09  | 33.12 | 31  | 182 | 634  | 67.7  | 7.01  |
| Q9EPW0   | Type 1 inositol 3,4-bisphosphate 4-phosphatase OS=Mus musculus GN=Inpp4a PE=2 SV=1 -                                                  | 35.78 | 1 | 11 | 25 | 94  | 0.596 | 1.026 | 1.045 | 1.070 | 261.37  | 35.78 | 44  | 94  | 939  | 105.5 | 7.05  |
| Q35379   | Multidrug resistance-associated protein 1 OS=Mus musculus GN=Abcc1 PE=1 SV=1 - [MRP1_MOUSE]                                           | 4.12  | 2 | 5  | 5  | 12  | 0.997 | 0.911 | 1.220 | 1.070 | 38.21   | 4.12  | 8   | 12  | 1528 | 171.1 | 7.36  |

|          |                                                                                                                           |       |    |    |    |     |       |       |       |       |         |       |    |     |      |       |      |
|----------|---------------------------------------------------------------------------------------------------------------------------|-------|----|----|----|-----|-------|-------|-------|-------|---------|-------|----|-----|------|-------|------|
| Q9DCV4   | Regulator of microtubule dynamics protein 1<br>OS=Mus musculus<br>GN=Rmdn1 PE=2 SV=2 - [RMD1_MOUSE]                       | 30.16 | 2  | 7  | 8  | 17  | 1.976 | 0.910 | 0.818 | 1.070 | 55.12   | 30.16 | 11 | 17  | 305  | 35.0  | 8.70 |
| P12849   | cAMP-dependent protein kinase type I-beta regulatory subunit<br>OS=Mus musculus<br>GN=Prkar1b PE=2 SV=2 - [PRKAR1B_MOUSE] | 38.32 | 8  | 9  | 12 | 67  | 0.854 | 1.004 | 1.183 | 1.070 | 231.69  | 38.32 | 23 | 67  | 381  | 43.2  | 5.96 |
| O35250   | Exocyst complex component 7<br>OS=Mus musculus<br>GN=Exoc7 PE=1 SV=2 - [EXOC7_MOUSE]                                      | 49.78 | 5  | 31 | 31 | 112 | 0.732 | 1.302 | 1.092 | 1.071 | 336.02  | 49.78 | 54 | 112 | 697  | 79.9  | 6.98 |
| O08749   | Dihydropyridyl dehydrogenase, mitochondrial<br>OS=Mus musculus<br>GN=Dld PE=1 SV=2 - [DLDH_MOUSE]                         | 67.98 | 1  | 26 | 26 | 546 | 1.714 | 1.175 | 1.269 | 1.071 | 1705.02 | 67.98 | 45 | 546 | 509  | 54.2  | 7.90 |
| Q9CZ86   | Protein Zfp248<br>OS=Mus musculus<br>GN=Zfp248 PE=2 SV=1 - [Q9CZ86_MOUSE]                                                 | 2.32  | 2  | 1  | 1  | 1   | 9.386 | 1.586 | 1.209 | 1.071 | 2.31    | 2.32  | 1  | 1   | 475  | 54.5  | 8.88 |
| Q8R059   | UDP-glucose 4-epimerase<br>OS=Mus musculus<br>GN=Gale PE=2 SV=1 - [GALE_MOUSE]                                            | 25.65 | 3  | 8  | 8  | 24  | 0.887 | 0.964 | 0.935 | 1.071 | 72.04   | 25.65 | 14 | 24  | 347  | 38.2  | 6.74 |
| Q9D358   | Low molecular weight phosphotyrosine protein phosphatase<br>OS=Mus musculus<br>GN=Acp1 PE=1 SV=3 - [PPAC_MOUSE]           | 50.63 | 1  | 3  | 8  | 43  | 1.940 | 1.212 | 0.931 | 1.071 | 141.13  | 50.63 | 12 | 43  | 158  | 18.2  | 6.74 |
| Q9D061   | Acyl-CoA-binding domain-containing protein 6<br>OS=Mus musculus<br>GN=Acbb6 PE=1 SV=2 - [ACBD6_MOUSE]                     | 51.06 | 3  | 13 | 13 | 54  | 1.161 | 1.202 | 1.249 | 1.071 | 164.22  | 51.06 | 23 | 54  | 282  | 30.9  | 5.11 |
| D3YVE8   | Solute carrier family 35 member G2<br>OS=Mus musculus<br>GN=Slc35g2 PE=3 SV=1 - [SLC35G2_MOUSE]                           | 9.71  | 1  | 4  | 4  | 17  | 0.660 | 0.610 | 0.669 | 1.071 | 43.06   | 9.71  | 6  | 17  | 412  | 46.4  | 7.87 |
| F7D6J5   | Sodium channel protein type 8 subunit alpha<br>OS=Mus musculus<br>GN=Scn8a PE=2 SV=1 - [F7D6J5_MOUSE]                     | 12.87 | 13 | 16 | 20 | 40  | 0.701 | 0.660 | 1.236 | 1.071 | 125.89  | 12.87 | 27 | 40  | 1849 | 210.9 | 6.11 |
| O35083   | 1-acyl-sn-glycerol-3-phosphate acyltransferase alpha<br>OS=Mus musculus<br>GN=Agpat1 PE=2 SV=1 - [PLCA_MOUSE]             | 31.23 | 1  | 2  | 7  | 18  | 0.746 | 0.963 | 0.967 | 1.071 | 55.79   | 31.23 | 12 | 18  | 285  | 31.7  | 9.14 |
| P48168   | Glycine receptor subunit beta<br>OS=Mus musculus<br>GN=Glr3 PE=1 SV=2 - [GLRB_MOUSE]                                      | 15.32 | 2  | 6  | 6  | 23  | 1.211 | 0.415 | 0.748 | 1.071 | 68.97   | 15.32 | 12 | 23  | 496  | 55.9  | 8.81 |
| Q8R502   | Leucine-rich repeat-containing protein 8C<br>OS=Mus musculus<br>GN=Lrrc8c PE=1 SV=1 - [LRC8C_MOUSE]                       | 14.82 | 3  | 8  | 9  | 27  | 0.829 | 0.961 | 1.069 | 1.071 | 102.26  | 14.82 | 16 | 27  | 803  | 92.3  | 7.81 |
| P35235   | Tyrosine-protein phosphatase non-receptor type 11<br>OS=Mus musculus<br>GN=Ptpn11 PE=1 SV=2 - [PTN11_MOUSE]               | 50.75 | 2  | 28 | 28 | 145 | 0.942 | 0.795 | 1.016 | 1.071 | 432.32  | 50.75 | 52 | 145 | 597  | 68.4  | 7.30 |
| E9Q6P4   | Protein Tubgcp6<br>OS=Mus musculus<br>GN=Tubgcp6 PE=2 SV=1 - [E9Q6P4_MOUSE]                                               | 4.20  | 2  | 3  | 4  | 12  | 0.724 | 0.878 | 1.109 | 1.071 | 33.76   | 4.20  | 8  | 12  | 1761 | 196.1 | 5.92 |
| Q9CRA9   | FGFR1 oncogene partner 2 homolog<br>OS=Mus musculus<br>GN=Fgfr1op2 PE=2 SV=1 - [FGOP2_MOUSE]                              | 32.81 | 2  | 1  | 8  | 34  | 1.972 | 1.216 | 1.218 | 1.071 | 108.91  | 32.81 | 11 | 34  | 253  | 29.4  | 5.83 |
| Q9DB32   | Hydroxyacylglutathione hydrolase-like protein<br>OS=Mus musculus<br>GN=Haghl PE=2 SV=1 - [HAGHL_MOUSE]                    | 46.64 | 4  | 9  | 9  | 26  | 1.700 | 0.851 | 0.731 | 1.071 | 89.32   | 46.64 | 16 | 26  | 283  | 31.5  | 5.55 |
| Q5DU56-5 | Isoform 5 of Protein NLR3<br>OS=Mus musculus<br>GN=Nlr3 - [NLR3_MOUSE]                                                    | 7.11  | 5  | 1  | 2  | 2   | 2.541 | 0.897 | 1.045 | 1.071 | 3.89    | 7.11  | 2  | 2   | 239  | 25.5  | 9.17 |
| Q9ESM6   | Glycerophosphoinositol inositolphosphodiesterase GDPD2<br>OS=Mus musculus<br>GN=Gdpd2 PE=1 SV=1 - [GDPD2_MOUSE]           | 7.61  | 1  | 3  | 3  | 7   | 0.724 | 0.699 | 0.660 | 1.072 | 18.63   | 7.61  | 5  | 7   | 539  | 61.1  | 8.16 |
| Q8R1C3-2 | Isoform 2 of Vesicular, overexpressed in cancer, prosurvival protein 1<br>OS=Mus musculus<br>GN=Vopp1 - [VOPP1_MOUSE]     | 7.89  | 2  | 1  | 1  | 2   | 0.740 | 0.995 | 0.957 | 1.072 | 3.69    | 7.89  | 2  | 2   | 114  | 13.3  | 8.25 |
| Q9QX60-2 | Isoform 2 of Deoxyguanosine kinase, mitochondrial<br>OS=Mus musculus<br>GN=Dguok - [DGUOK_MOUSE]                          | 15.45 | 3  | 2  | 2  | 5   | 1.441 | 0.776 | 0.945 | 1.072 | 13.31   | 15.45 | 3  | 5   | 246  | 28.8  | 6.28 |
| D3Z641   | Tetraspanin-5<br>OS=Mus musculus<br>GN=Tspan5 PE=4 SV=1 - [D3Z641_MOUSE]                                                  | 15.23 | 2  | 2  | 2  | 10  | 0.668 | 0.851 | 0.895 | 1.072 | 35.01   | 15.23 | 3  | 10  | 197  | 22.4  | 4.60 |
| Q03717   | Potassium voltage-gated channel subfamily B member 1<br>OS=Mus musculus<br>GN=Kcnb1 PE=1 SV=2 - [KCNB1_MOUSE]             | 11.90 | 1  | 8  | 8  | 27  | 0.864 | 1.288 | 1.596 | 1.072 | 74.74   | 11.90 | 15 | 27  | 857  | 95.5  | 8.16 |

|          |                                                                                                                     |       |   |    |    |     |        |       |       |       |        |       |    |     |      |       |      |
|----------|---------------------------------------------------------------------------------------------------------------------|-------|---|----|----|-----|--------|-------|-------|-------|--------|-------|----|-----|------|-------|------|
| P26618   | Platelet-derived growth factor receptor alpha<br>OS=Mus musculus<br>GN=Pdgfra PE=1 SV=3 - [PGFRA_MOUSE]             | 7.99  | 8 | 7  | 8  | 26  | 1.339  | 1.770 | 1.028 | 1.072 | 62.62  | 7.99  | 12 | 26  | 1089 | 122.6 | 5.15 |
| Q00898   | Alpha-1-antitrypsin 1-5<br>OS=Mus musculus<br>GN=Serpina1e PE=1 SV=1 - [AIATS_MOUSE]                                | 35.35 | 2 | 4  | 13 | 133 | 10.152 | 5.515 | 3.309 | 1.072 | 419.13 | 35.35 | 24 | 133 | 413  | 45.9  | 5.73 |
| Q6PD10   | Inositol hexakisphosphate kinase 1<br>OS=Mus musculus<br>GN=Ipk1 PE=2 SV=1 - [IP6K1_MOUSE]                          | 17.09 | 4 | 7  | 7  | 19  | 0.709  | 0.770 | 0.919 | 1.072 | 55.72  | 17.09 | 11 | 19  | 433  | 49.3  | 7.23 |
| Q564G0   | Guanylate kinase OS=Mus musculus<br>GN=Guk1 PE=2 SV=1 - [Q564G0_MOUSE]                                              | 59.82 | 3 | 10 | 10 | 35  | 1.350  | 1.257 | 1.127 | 1.072 | 95.53  | 59.82 | 18 | 35  | 219  | 24.0  | 7.44 |
| Q8C4Y3   | Negative elongation factor B<br>OS=Mus musculus<br>GN=Nelfb PE=2 SV=2 - [NELFB_MOUSE]                               | 17.07 | 2 | 10 | 11 | 21  | 1.472  | 1.153 | 0.843 | 1.072 | 54.20  | 17.07 | 14 | 21  | 580  | 65.6  | 6.02 |
| Q8CF93   | Polypeptide N-acetylgalactosaminyltransferase 13<br>OS=Mus musculus<br>GN=Galnt13 PE=2 SV=1 - [GALNT13_MOUSE]       | 4.86  | 3 | 2  | 3  | 8   | 1.610  | 0.812 | 1.020 | 1.072 | 21.95  | 4.86  | 4  | 8   | 556  | 63.9  | 6.83 |
| P35546-2 | Isoform 2 of Proto-oncogene tyrosine-protein kinase receptor Ret<br>OS=Mus musculus<br>GN=Ret - [RET_MOUSE]         | 5.78  | 2 | 5  | 6  | 7   | 1.090  | 0.727 | 1.090 | 1.072 | 13.18  | 5.78  | 7  | 7   | 1073 | 119.4 | 7.06 |
| Q9D906   | Ubiquitin-like modifier-activating enzyme ATG7<br>OS=Mus musculus<br>GN=Atg7 PE=1 SV=1 - [ATG7_MOUSE]               | 32.38 | 1 | 17 | 17 | 58  | 0.879  | 0.891 | 1.061 | 1.072 | 166.81 | 32.38 | 29 | 58  | 698  | 77.5  | 6.40 |
| Q80VM7   | Ankyrin repeat domain-containing protein 24<br>OS=Mus musculus<br>GN=Ankrd24 PE=2 SV=4 - [ANR24_MOUSE]              | 5.18  | 2 | 4  | 5  | 12  | 0.844  | 1.347 | 1.204 | 1.072 | 22.62  | 5.18  | 7  | 12  | 985  | 106.2 | 4.89 |
| Q8K3Z7   | Type II inositol 1,4,5-trisphosphate 5-phosphatase<br>OS=Mus musculus<br>GN=Inpp5b PE=1 SV=1 - [INPP5B_MOUSE]       | 7.15  | 3 | 6  | 7  | 11  | 1.178  | 1.229 | 1.118 | 1.073 | 26.63  | 7.15  | 9  | 11  | 993  | 112.7 | 5.64 |
| Q8C0K5   | Graves disease carrier protein homolog<br>OS=Mus musculus<br>GN=Slc25a16 PE=2 SV=1 - [GDC_MOUSE]                    | 16.27 | 3 | 3  | 4  | 11  | 0.807  | 1.203 | 1.037 | 1.073 | 30.17  | 16.27 | 7  | 11  | 332  | 36.2  | 9.88 |
| O88951   | Protein lin-7 homolog B<br>OS=Mus musculus<br>GN=Lin7b PE=1 SV=2 - [LIN7B_MOUSE]                                    | 43.00 | 4 | 5  | 10 | 67  | 1.212  | 1.141 | 1.080 | 1.073 | 175.24 | 43.00 | 17 | 67  | 207  | 22.9  | 8.68 |
| Q3UMF0-4 | Isoform 4 of Cordon-bleu protein-like 1<br>OS=Mus musculus<br>GN=Cobl1 - [COBL1_MOUSE]                              | 22.86 | 6 | 1  | 20 | 76  | 1.266  | 0.659 | 1.042 | 1.073 | 231.18 | 22.86 | 34 | 76  | 1203 | 129.5 | 8.00 |
| P58750   | Serine/threonine-protein kinase pim-3<br>OS=Mus musculus<br>GN=Pim3 PE=1 SV=1 - [PIM3_MOUSE]                        | 6.44  | 1 | 1  | 1  | 1   | 1.419  | 0.759 | 1.059 | 1.073 | 2.58   | 6.44  | 1  | 1   | 326  | 35.9  | 5.83 |
| Q8VC16   | Leucine-rich repeat-containing protein 14<br>OS=Mus musculus<br>GN=Lrrc14 PE=2 SV=1 - [LRC14_MOUSE]                 | 12.58 | 3 | 4  | 5  | 9   | 1.067  | 0.901 | 0.939 | 1.073 | 26.11  | 12.58 | 7  | 9   | 493  | 54.9  | 6.67 |
| Q9DBS1   | Transmembrane protein 43<br>OS=Mus musculus<br>GN=Tmem43 PE=1 SV=1 - [TMEM43_MOUSE]                                 | 39.75 | 1 | 11 | 11 | 29  | 0.636  | 1.293 | 0.849 | 1.073 | 95.67  | 39.75 | 16 | 29  | 400  | 44.8  | 7.36 |
| A6H8H5   | Potassium voltage-gated channel subfamily B member 2<br>OS=Mus musculus<br>GN=Kcnb2 PE=2 SV=2 - [KCNB2_MOUSE]       | 8.27  | 1 | 5  | 5  | 9   | 1.368  | 0.996 | 1.116 | 1.073 | 28.42  | 8.27  | 7  | 9   | 907  | 102.3 | 6.10 |
| Q99MR1   | PERQ amino acid-rich with GYF domain-containing protein 1<br>OS=Mus musculus<br>GN=Gigyf1 PE=1 SV=2 - [GYGF1_MOUSE] | 7.47  | 1 | 6  | 6  | 10  | 0.808  | 0.761 | 1.182 | 1.073 | 26.04  | 7.47  | 9  | 10  | 1044 | 116.2 | 5.39 |
| Q60700   | Mitogen-activated protein kinase kinase 12<br>OS=Mus musculus<br>GN=Map3k12 PE=1 SV=1 - [M3K12_MOUSE]               | 10.92 | 3 | 7  | 8  | 18  | 0.902  | 0.701 | 1.021 | 1.073 | 49.18  | 10.92 | 13 | 18  | 888  | 96.0  | 6.24 |
| Q9CPV2   | Anaphase-promoting complex subunit 16<br>OS=Mus musculus<br>GN=Anapc16 PE=2 SV=1 - [APC16_MOUSE]                    | 6.36  | 1 | 1  | 1  | 2   | 1.075  | 0.956 | 1.052 | 1.073 | 4.40   | 6.36  | 2  | 2   | 110  | 11.7  | 4.97 |
| Q8BGT5   | Alanine aminotransferase 2<br>OS=Mus musculus<br>GN=Gpt2 PE=2 SV=1 - [ALAT2_MOUSE]                                  | 26.44 | 2 | 9  | 11 | 38  | 0.832  | 0.909 | 0.894 | 1.073 | 107.60 | 26.44 | 20 | 38  | 522  | 57.9  | 8.00 |
| Q8K1H1   | Tudor domain-containing protein 7<br>OS=Mus musculus<br>GN=Tdrd7 PE=1 SV=1 - [TDRD7_MOUSE]                          | 13.54 | 1 | 13 | 13 | 21  | 1.109  | 1.102 | 1.040 | 1.073 | 47.46  | 13.54 | 18 | 21  | 1086 | 122.1 | 6.70 |
| P54254   | Ataxin-1<br>OS=Mus musculus<br>GN=Atxn1 PE=1 SV=2 - [ATX1_MOUSE]                                                    | 14.66 | 2 | 8  | 8  | 21  | 1.522  | 1.414 | 1.860 | 1.073 | 42.87  | 14.66 | 15 | 21  | 791  | 83.7  | 8.16 |
| D3Z495   | Protein spire homolog 1<br>OS=Mus musculus<br>GN=Spire1 PE=2 SV=1 - [D3Z495_MOUSE]                                  | 16.12 | 6 | 7  | 8  | 36  | 0.713  | 0.835 | 1.118 | 1.073 | 102.82 | 16.12 | 14 | 36  | 515  | 59.4  | 9.52 |

|          |                                                                                                                                           |       |   |    |    |     |       |       |       |       |         |       |    |     |      |       |      |
|----------|-------------------------------------------------------------------------------------------------------------------------------------------|-------|---|----|----|-----|-------|-------|-------|-------|---------|-------|----|-----|------|-------|------|
| Q8CAU8   | EGF-like repeat and discoidin I-like domain-containing protein 3<br>OS=Mus musculus<br>GN=Edi3 PE=2 SV=1 - [ED3_MOUSE]                    | 25.32 | 4 | 11 | 11 | 21  | 1.054 | 0.639 | 0.804 | 1.073 | 65.20   | 25.32 | 17 | 21  | 470  | 52.7  | 7.80 |
| Q61171   | Peroxiredoxin-2<br>OS=Mus musculus<br>GN=Prdx2 PE=1 SV=3 - [PRDX2_MOUSE]                                                                  | 53.54 | 2 | 12 | 12 | 343 | 1.528 | 1.115 | 0.964 | 1.074 | 1001.15 | 53.54 | 24 | 343 | 198  | 21.8  | 5.41 |
| P70660   | Neurogenin-1<br>OS=Mus musculus<br>GN=Neurog1 PE=1 SV=1 - [NGN1_MOUSE]                                                                    | 8.61  | 1 | 1  | 1  | 2   | 1.836 | 1.581 | 1.101 | 1.074 | 5.92    | 8.61  | 1  | 2   | 244  | 26.3  | 6.54 |
| Q8VD65   | Phosphoinositide 3-kinase regulatory subunit 4<br>OS=Mus musculus<br>GN=PI3R4 PE=1 SV=3 - [PI3R4_MOUSE]                                   | 21.87 | 1 | 24 | 24 | 66  | 0.690 | 0.998 | 1.025 | 1.074 | 172.71  | 21.87 | 40 | 66  | 1358 | 152.5 | 7.12 |
| Q64448   | Gap junction alpha-3 protein<br>OS=Mus musculus<br>GN=Gja3 PE=2 SV=4 - [CX33_MOUSE]                                                       | 1.68  | 1 | 1  | 1  | 2   | 0.953 | 1.406 | 0.914 | 1.074 | 4.22    | 1.68  | 2  | 2   | 417  | 46.3  | 7.53 |
| Q8CHG7   | Rap guanine nucleotide exchange factor 2<br>OS=Mus musculus<br>GN=Rapgef2 PE=1 SV=2 - [RPGF2_MOUSE]                                       | 35.56 | 3 | 32 | 38 | 154 | 1.003 | 1.146 | 1.316 | 1.074 | 504.85  | 35.56 | 61 | 154 | 1496 | 166.3 | 6.61 |
| A2AIL4   | NADH dehydrogenase (ubiquinone) complex I, assembly factor 6<br>OS=Mus musculus<br>GN=Ndufa6 PE=1 SV=1 - [NDUFA6_MOUSE]                   | 5.71  | 1 | 2  | 2  | 3   | 1.091 | 1.048 | 0.890 | 1.074 | 8.79    | 5.71  | 3  | 3   | 333  | 38.3  | 9.44 |
| E9PZP8   | Protein Herc1<br>OS=Mus musculus<br>GN=Herc1 PE=2 SV=1 - [E9PZP8_MOUSE]                                                                   | 12.02 | 2 | 41 | 41 | 97  | 0.738 | 0.802 | 1.000 | 1.074 | 281.45  | 12.02 | 63 | 97  | 4859 | 532.3 | 6.04 |
| D3Z451   | MCG54087<br>OS=Mus musculus<br>GN=Serpina3 PE=3 SV=1 - [D3Z451_MOUSE]                                                                     | 11.19 | 1 | 1  | 3  | 7   | 1.669 | 1.075 | 1.038 | 1.074 | 19.94   | 11.19 | 4  | 7   | 420  | 47.3  | 7.50 |
| P28063   | Proteasome subunit beta type-8<br>OS=Mus musculus<br>GN=Psmb8 PE=1 SV=2 - [PSB8_MOUSE]                                                    | 12.32 | 2 | 3  | 3  | 9   | 1.560 | 1.516 | 0.772 | 1.074 | 16.18   | 12.32 | 6  | 9   | 276  | 30.2  | 6.68 |
| Q9ER73   | Elongator complex protein 4<br>OS=Mus musculus<br>GN=Elp4 PE=2 SV=2 - [ELP4_MOUSE]                                                        | 30.09 | 2 | 11 | 11 | 41  | 0.699 | 0.963 | 1.007 | 1.074 | 119.50  | 30.09 | 20 | 41  | 422  | 46.3  | 8.78 |
| Q80Y24   | Prickle-like protein 2<br>OS=Mus musculus<br>GN=Prickle2 PE=1 SV=3 - [PRIC2_MOUSE]                                                        | 24.14 | 2 | 15 | 15 | 47  | 0.821 | 1.704 | 1.608 | 1.074 | 143.81  | 24.14 | 27 | 47  | 845  | 95.7  | 7.27 |
| Q7TN33   | CLUGBP Elav-like family member 6<br>OS=Mus musculus<br>GN=Celf6 PE=2 SV=1 - [CELF6_MOUSE]                                                 | 16.96 | 6 | 3  | 7  | 34  | 0.713 | 1.061 | 0.528 | 1.074 | 90.30   | 16.96 | 13 | 34  | 460  | 48.2  | 8.65 |
| P70390-2 | Isoform 2 of Short stature homeobox protein 2<br>OS=Mus musculus<br>GN=Shox2 - [SHOX2_MOUSE]                                              | 15.05 | 2 | 4  | 4  | 8   | 2.109 | 0.944 | 1.167 | 1.074 | 14.26   | 15.05 | 4  | 8   | 319  | 33.6  | 9.11 |
| Q7TQI7   | Ankyrin repeat and BTB/POZ domain-containing protein 2<br>OS=Mus musculus<br>GN=Abtb2 PE=2 SV=1 - [ABTB2_MOUSE]                           | 13.77 | 1 | 10 | 10 | 14  | 2.517 | 1.123 | 1.242 | 1.074 | 33.76   | 13.77 | 14 | 14  | 1024 | 113.4 | 6.28 |
| O70281   | Protein-tyrosine sulfotransferase 1<br>OS=Mus musculus<br>GN=Tpst1 PE=2 SV=1 - [TPST1_MOUSE]                                              | 11.89 | 2 | 3  | 3  | 8   | 1.206 | 1.019 | 0.896 | 1.074 | 13.69   | 11.89 | 5  | 8   | 370  | 42.1  | 9.09 |
| O55026   | Ectonucleoside triphosphate diphosphohydrolase 2<br>OS=Mus musculus<br>GN=Entpd2 PE=1 SV=2 - [ENTPD2_MOUSE]                               | 12.53 | 2 | 6  | 6  | 21  | 0.745 | 1.189 | 0.658 | 1.074 | 57.03   | 12.53 | 10 | 21  | 495  | 54.3  | 8.37 |
| F7B0R9   | Protein 2010300C02Rik (Fragment)<br>OS=Mus musculus<br>GN=2010300C02Rik PE=4 SV=1 - [F7B0R9_MOUSE]                                        | 64.88 | 1 | 1  | 31 | 118 | 3.729 | 1.282 | 2.470 | 1.074 | 337.17  | 64.88 | 51 | 118 | 652  | 69.5  | 9.39 |
| P80313   | T-complex protein 1 subunit epsilon<br>OS=Mus musculus<br>GN=Cct7 PE=1 SV=1 - [TCPH1_MOUSE]                                               | 58.82 | 1 | 28 | 28 | 146 | 0.631 | 1.027 | 0.859 | 1.074 | 462.79  | 58.82 | 49 | 146 | 544  | 59.6  | 7.84 |
| D3YZG8   | Probable bifunctional methylenetetrahydrofolate dehydrogenase/cyclohydrolyase 2<br>OS=Mus musculus<br>GN=Mthfd2 PE=3 SV=1 - [MTD2L_MOUSE] | 35.50 | 1 | 8  | 9  | 16  | 2.501 | 0.559 | 0.531 | 1.074 | 41.08   | 35.50 | 14 | 16  | 338  | 36.4  | 9.39 |
| Q8R0G9   | Nuclear pore complex protein Nup133<br>OS=Mus musculus<br>GN=Nup133 PE=1 SV=2 - [NU133_MOUSE]                                             | 16.71 | 1 | 12 | 13 | 42  | 0.947 | 0.975 | 0.919 | 1.074 | 127.02  | 16.71 | 21 | 42  | 1155 | 128.5 | 5.20 |
| Q9CQ54   | Solute carrier family 25 member 46<br>OS=Mus musculus<br>GN=Slc25a46 PE=1 SV=1                                                            | 44.02 | 1 | 12 | 12 | 67  | 0.717 | 0.981 | 0.946 | 1.074 | 161.70  | 44.02 | 21 | 67  | 418  | 46.2  | 7.64 |
| Q9CXR1   | Dehydrogenase/reductase SDR family member 7<br>OS=Mus musculus<br>GN=Dhrs7 PE=2 SV=2 - [DHR57_MOUSE]                                      | 44.97 | 1 | 11 | 11 | 27  | 1.264 | 0.957 | 1.261 | 1.074 | 77.26   | 44.97 | 16 | 27  | 338  | 38.1  | 8.32 |
| Q9CXT8   | Mitochondrial-processing peptidase subunit beta<br>OS=Mus musculus<br>GN=Pmpcb PE=2 SV=1 - [MPPB_MOUSE]                                   | 43.15 | 3 | 15 | 16 | 58  | 0.995 | 1.055 | 0.858 | 1.074 | 179.60  | 43.15 | 28 | 58  | 489  | 54.6  | 6.99 |



|          |                                                                                                                                 |       |    |    |    |      |       |       |       |       |         |       |    |      |      |       |       |
|----------|---------------------------------------------------------------------------------------------------------------------------------|-------|----|----|----|------|-------|-------|-------|-------|---------|-------|----|------|------|-------|-------|
| Q0VF62   | Bcas3 protein OS=Mus musculus GN=Bcas3 PE=2 SV=1 - [Q0VF62_MOUSE]                                                               | 32.75 | 5  | 9  | 23 | 121  | 0.741 | 1.165 | 1.115 | 1.074 | 368.90  | 32.75 | 46 | 121  | 913  | 99.4  | 6.64  |
| Q02053   | Ubiquitin-like modifier-activating enzyme 1 OS=Mus musculus GN=Uba1 PE=1 SV=1 - [UBA1_MOUSE]                                    | 59.26 | 2  | 46 | 46 | 597  | 0.702 | 1.105 | 1.003 | 1.074 | 1972.15 | 59.26 | 84 | 597  | 1058 | 117.7 | 5.66  |
| Q91X51   | Golgi reassembly-stacking protein 1 OS=Mus musculus GN=Gorasp1 PE=2 SV=3 -                                                      | 12.56 | 1  | 3  | 3  | 20   | 1.885 | 1.050 | 0.981 | 1.074 | 64.44   | 12.56 | 6  | 20   | 446  | 46.9  | 4.65  |
| Q6A037   | NEDD4-binding protein 1 OS=Mus musculus GN=N4bp1 PE=1 SV=2 - [N4BP1_MOUSE]                                                      | 13.44 | 1  | 9  | 10 | 37   | 0.902 | 1.094 | 0.995 | 1.074 | 96.05   | 13.44 | 12 | 37   | 893  | 99.1  | 5.74  |
| Q80WJ1-2 | Isoform 2 of Gametogenetin OS=Mus musculus GN=Ggn - [GGN_MOUSE]                                                                 | 10.04 | 3  | 2  | 2  | 2    | 1.260 | 1.084 | 1.197 | 1.075 | 4.63    | 10.04 | 2  | 2    | 269  | 28.6  | 10.59 |
| Q3T0K6   | Protein rogd1 homolog OS=Mus musculus GN=Rogdi PE=2 SV=2 - [ROGDI_MOUSE]                                                        | 40.07 | 3  | 10 | 10 | 47   | 0.530 | 1.397 | 1.018 | 1.075 | 141.10  | 40.07 | 18 | 47   | 287  | 32.1  | 8.18  |
| Q3ULL6   | Protein Upf3b OS=Mus musculus GN=Upf3b PE=2 SV=1 - [Q3ULL6_MOUSE]                                                               | 15.68 | 2  | 6  | 6  | 12   | 1.474 | 1.162 | 1.073 | 1.075 | 32.16   | 15.68 | 9  | 12   | 472  | 57.0  | 9.44  |
| P63137-2 | Isoform 2 of Gamma-aminobutyric acid receptor subunit beta-2 OS=Mus musculus GN=Gabbr2 - [GBRB2_MOUSE]                          | 19.62 | 3  | 5  | 8  | 30   | 0.456 | 0.808 | 1.145 | 1.075 | 93.37   | 19.62 | 13 | 30   | 474  | 54.6  | 9.32  |
| O88697   | Serine/threonine-protein kinase 16 OS=Mus musculus GN=Stk16 PE=1 SV=3 - [STK16_MOUSE]                                           | 18.03 | 2  | 3  | 3  | 12   | 1.049 | 1.495 | 1.212 | 1.075 | 35.18   | 18.03 | 5  | 12   | 305  | 34.4  | 6.46  |
| P01863   | Ig gamma-2A chain C region, A allele OS=Mus musculus GN=Ighg PE=1 SV=1 - [GCAA_MOUSE]                                           | 15.45 | 3  | 3  | 4  | 14   | 3.594 | 9.571 | 0.177 | 1.075 | 35.93   | 15.45 | 8  | 14   | 330  | 36.4  | 7.40  |
| P22599   | Alpha-1-antitrypsin 1-2 OS=Mus musculus GN=Serpina1b PE=1 SV=2 - [A1AT2_MOUSE]                                                  | 47.46 | 2  | 3  | 15 | 166  | 2.929 | 2.390 | 0.614 | 1.075 | 467.41  | 47.46 | 27 | 166  | 413  | 45.9  | 5.54  |
| P61406   | Telomerase-binding protein EST1A OS=Mus musculus GN=Smg6 PE=2 SV=1 - [EST1A_MOUSE]                                              | 5.57  | 1  | 6  | 7  | 12   | 0.764 | 0.883 | 0.858 | 1.075 | 36.08   | 5.57  | 9  | 12   | 1418 | 160.4 | 6.77  |
| Q91XX1   | Protein Pcdhgb6 OS=Mus musculus GN=Pcdhgc3 PE=2 SV=1 - [Q91XX1_MOUSE]                                                           | 19.70 | 1  | 10 | 12 | 43   | 0.774 | 0.870 | 1.024 | 1.075 | 125.52  | 19.70 | 23 | 43   | 934  | 101.0 | 5.07  |
| Q8C570   | mRNA export factor OS=Mus musculus GN=Rae1 PE=1 SV=1 - [RAE1_MOUSE]                                                             | 40.22 | 2  | 14 | 14 | 44   | 1.213 | 1.100 | 1.023 | 1.075 | 131.43  | 40.22 | 22 | 44   | 368  | 40.9  | 7.83  |
| Q8K329   | Nuclear envelope pore membrane protein POM121 OS=Mus musculus GN=Pom121 PE=1 SV=2 - [PO121_MOUSE]                               | 9.75  | 2  | 8  | 8  | 12   | 1.156 | 0.767 | 1.250 | 1.075 | 38.12   | 9.75  | 12 | 12   | 1200 | 120.9 | 10.20 |
| Q91Z23   | Beta-synuclein OS=Mus musculus GN=Snca PE=1 SV=1 - [SYUB_MOUSE]                                                                 | 50.38 | 1  | 5  | 8  | 297  | 1.329 | 1.233 | 1.549 | 1.076 | 948.47  | 50.38 | 15 | 297  | 133  | 14.0  | 4.37  |
| P28663   | Beta-soluble NSF attachment protein OS=Mus musculus GN=Napb PE=1 SV=2 - [SNAB_MOUSE]                                            | 78.86 | 2  | 18 | 23 | 278  | 0.804 | 1.621 | 1.226 | 1.076 | 798.89  | 78.86 | 41 | 278  | 298  | 33.5  | 5.47  |
| P52480   | Pyruvate kinase PKM OS=Mus musculus GN=Pkm PE=1 SV=4 - [KPYM_MOUSE]                                                             | 80.41 | 1  | 2  | 45 | 1748 | 1.300 | 0.999 | 0.777 | 1.076 | 5260.02 | 80.41 | 83 | 1748 | 531  | 57.8  | 7.47  |
| O88705   | Potassium/sodium hyperpolarization-activated cyclic nucleotide-gated channel 3 OS=Mus musculus GN=Hcn3 PE=1 SV=1 - [HCN3_MOUSE] | 15.66 | 1  | 10 | 11 | 39   | 0.895 | 0.886 | 1.061 | 1.076 | 111.88  | 15.66 | 17 | 39   | 779  | 86.6  | 9.86  |
| Q8BLS7   | Ankyrin repeat domain-containing protein SOWAHA OS=Mus musculus GN=Sowaha PE=2 SV=2 - [SOWAHA_MOUSE]                            | 10.40 | 1  | 4  | 4  | 7    | 1.595 | 1.624 | 1.504 | 1.076 | 20.18   | 10.40 | 6  | 7    | 548  | 57.7  | 9.82  |
| E9Q9C3   | Afsin OS=Mus musculus GN=Milt4 PE=2 SV=1 - [F9Q9C3_MOUSE]                                                                       | 36.73 | 4  | 2  | 54 | 177  | 0.636 | 1.437 | 1.242 | 1.076 | 512.92  | 36.73 | 88 | 177  | 1827 | 207.2 | 6.23  |
| P35436   | Glutamate receptor ionotropic, NMDA 2A OS=Mus musculus GN=Grin2a PE=1 SV=2 - [NMDE1_MOUSE]                                      | 21.38 | 1  | 24 | 24 | 72   | 0.783 | 1.321 | 2.259 | 1.076 | 209.77  | 21.38 | 39 | 72   | 1464 | 165.3 | 7.01  |
| Q9CRA9-2 | Isoform 2 of FGFR1 oncogene partner 2 homolog OS=Mus musculus GN=Fgfr1op2 - [FGOP2_MOUSE]                                       | 36.28 | 2  | 1  | 8  | 37   | 1.496 | 1.084 | 1.335 | 1.076 | 123.01  | 36.28 | 11 | 37   | 215  | 24.9  | 5.57  |
| Q6PDN3   | Myosin light chain kinase, smooth muscle OS=Mus musculus GN=Myk PE=1 SV=3 - [MYLK_MOUSE]                                        | 14.17 | 12 | 24 | 25 | 77   | 0.950 | 2.448 | 0.905 | 1.076 | 198.83  | 14.17 | 43 | 77   | 1941 | 212.8 | 6.25  |
| Q8C4G3   | Probable phospholipid-transporting ATPase IIA OS=Mus musculus GN=Atp9a PE=2 SV=1 - [Q8C4G3_MOUSE]                               | 22.25 | 8  | 21 | 23 | 50   | 0.739 | 0.900 | 0.909 | 1.076 | 136.45  | 22.25 | 30 | 50   | 1029 | 116.3 | 7.27  |

|          |                                                                                                                                                     |       |    |    |    |     |       |       |       |       |         |       |    |     |      |       |       |
|----------|-----------------------------------------------------------------------------------------------------------------------------------------------------|-------|----|----|----|-----|-------|-------|-------|-------|---------|-------|----|-----|------|-------|-------|
| Q9D1G1   | Ras-related protein Rab-1B<br>OS=Mus musculus<br>GN=Rab1b PE=1 SV=1 -<br>[RAB1B_MOUSE]                                                              | 85.57 | 1  | 7  | 16 | 165 | 1.081 | 1.225 | 1.046 | 1.076 | 459.71  | 85.57 | 30 | 165 | 201  | 22.2  | 5.73  |
| O09117-2 | Isoform 2 of<br>Synaptophysin-like protein<br>1 OS=Mus musculus<br>GN=Synpl1 -                                                                      | 17.28 | 3  | 4  | 4  | 20  | 1.411 | 0.810 | 1.081 | 1.076 | 59.78   | 17.28 | 7  | 20  | 243  | 26.7  | 7.72  |
| Q6PAM0   | 5'-AMP-activated protein<br>kinase subunit beta-2<br>OS=Mus musculus<br>GN=Prkab2 PE=1 SV=1 -<br>[AAKB2_MOUSE]                                      | 27.68 | 3  | 5  | 5  | 25  | 0.843 | 1.117 | 1.197 | 1.077 | 47.08   | 27.68 | 8  | 25  | 271  | 30.2  | 6.46  |
| Q80UPS   | Ankyrin repeat domain-<br>containing protein 13A<br>OS=Mus musculus<br>GN=Ankrd13a PE=1 SV=2 -<br>[ANI3A_MOUSE]                                     | 14.80 | 2  | 6  | 6  | 12  | 1.122 | 0.741 | 0.891 | 1.077 | 39.98   | 14.80 | 10 | 12  | 588  | 67.1  | 5.08  |
| Q9ERK4   | Exportin-2 OS=Mus<br>musculus GN=Cse11 PE=2<br>SV=1 - [XPO2_MOUSE]                                                                                  | 34.09 | 4  | 2  | 30 | 113 | 0.613 | 1.183 | 0.831 | 1.077 | 324.10  | 34.09 | 50 | 113 | 971  | 110.4 | 5.77  |
| G3X9S1   | Protein FAM13C OS=Mus<br>musculus GN=Fam13c<br>PE=4 SV=1 -<br>[G3X9S1_MOUSE]                                                                        | 9.83  | 3  | 4  | 5  | 16  | 1.140 | 1.221 | 1.571 | 1.077 | 48.86   | 9.83  | 9  | 16  | 519  | 57.9  | 6.73  |
| Q99NF8   | Ran-binding protein 17<br>OS=Mus musculus<br>GN=Ranbp17 PE=2 SV=1 -<br>[RBP17_MOUSE]                                                                | 0.83  | 1  | 1  | 1  | 1   | 0.805 | 0.807 | 1.065 | 1.077 | 2.19    | 0.83  | 1  | 1   | 1088 | 124.0 | 6.38  |
| Q5SVG5   | AP-1 complex subunit beta<br>1 OS=Mus musculus<br>GN=Ap1b1 PE=2 SV=1 -<br>[Q5SVG5_MOUSE]                                                            | 61.46 | 7  | 26 | 53 | 396 | 0.736 | 1.026 | 0.992 | 1.077 | 1158.92 | 61.46 | 93 | 396 | 916  | 101.1 | 5.22  |
| Q8C167   | Prolyl endopeptidase-like<br>OS=Mus musculus<br>GN=Prepl PE=2 SV=1 -<br>[PPCEL_MOUSE]                                                               | 38.48 | 4  | 25 | 25 | 127 | 0.843 | 0.819 | 0.676 | 1.077 | 381.37  | 38.48 | 40 | 127 | 725  | 83.1  | 6.65  |
| Q4FJZ2   | Importin subunit alpha<br>OS=Mus musculus<br>GN=Kpna6 PE=2 SV=1 -<br>[Q4FJZ2_MOUSE]                                                                 | 40.71 | 3  | 12 | 19 | 76  | 0.802 | 0.866 | 0.983 | 1.077 | 201.61  | 40.71 | 32 | 76  | 533  | 59.6  | 4.98  |
| O54828   | Regulator of G-protein<br>signaling 9 OS=Mus<br>musculus GN=Rgs9 PE=1<br>SV=3 - [RGS9_MOUSE]                                                        | 10.07 | 4  | 5  | 6  | 14  | 1.490 | 1.029 | 5.186 | 1.077 | 30.54   | 10.07 | 10 | 14  | 675  | 76.9  | 9.33  |
| P16301   | Phosphatidylcholine-sterol<br>acyltransferase OS=Mus<br>musculus GN=Lcat PE=1<br>SV=2 - [LCAT_MOUSE]                                                | 5.48  | 1  | 2  | 2  | 3   | 2.471 | 1.518 | 0.827 | 1.077 | 10.11   | 5.48  | 3  | 3   | 438  | 49.7  | 6.43  |
| F8WI30   | Sorting nexin-7 OS=Mus<br>musculus GN=Snx7 PE=2<br>SV=1 - [F8WI30_MOUSE]                                                                            | 22.25 | 4  | 10 | 10 | 22  | 1.048 | 2.418 | 1.093 | 1.077 | 68.76   | 22.25 | 17 | 22  | 445  | 50.8  | 4.82  |
| Q8K2Q0   | COMM domain-containing<br>protein 9 OS=Mus<br>musculus GN=Comm9<br>PE=2 SV=3 -                                                                      | 36.87 | 1  | 6  | 6  | 23  | 1.084 | 1.252 | 0.936 | 1.077 | 70.06   | 36.87 | 11 | 23  | 198  | 21.8  | 5.82  |
| A2BFQ5   | Histone H2A OS=Mus<br>musculus GN=Gm14474<br>PE=3 SV=1 -<br>[A2BFQ5_MOUSE]                                                                          | 31.43 | 3  | 1  | 1  | 2   | 0.500 | 1.399 | 0.607 | 1.077 | 2.84    | 31.43 | 1  | 2   | 105  | 12.1  | 10.23 |
| Q8BM10   | F-box only protein 38<br>OS=Mus musculus<br>GN=Fbxo38 PE=1 SV=1 -<br>[FBX38_MOUSE]                                                                  | 7.37  | 1  | 7  | 7  | 10  | 0.894 | 0.809 | 1.067 | 1.077 | 24.67   | 7.37  | 10 | 10  | 1194 | 133.8 | 6.09  |
| Q6P0X2   | Zinc finger protein 511<br>OS=Mus musculus<br>GN=Znf511 PE=2 SV=2 -<br>[ZN511_MOUSE]                                                                | 11.01 | 2  | 2  | 2  | 3   | 1.479 | 1.102 | 1.198 | 1.077 | 5.67    | 11.01 | 3  | 3   | 227  | 25.7  | 6.25  |
| E9Q5E2   | Protein BC005561 OS=Mus<br>musculus GN=BC005561<br>PE=2 SV=1 -<br>[E9Q5E2_MOUSE]                                                                    | 1.83  | 1  | 1  | 3  | 6   | 1.741 | 1.272 | 1.480 | 1.077 | 6.75    | 1.83  | 4  | 6   | 1589 | 182.6 | 8.56  |
| A2AFI8   | RalBP1-associated Eps<br>domain-containing protein<br>2 OS=Mus musculus<br>GN=Reps2 PE=2 SV=1 -<br>[A2AFI8_MOUSE]                                   | 42.97 | 4  | 20 | 22 | 76  | 1.114 | 1.173 | 1.460 | 1.077 | 238.32  | 42.97 | 38 | 76  | 647  | 70.4  | 7.25  |
| Q9D4H1   | Exocyst complex<br>component 2 OS=Mus<br>musculus GN=Exoc2 PE=1<br>SV=1 - [EXOC2_MOUSE]                                                             | 22.40 | 1  | 22 | 22 | 58  | 0.561 | 1.300 | 1.078 | 1.077 | 172.68  | 22.40 | 40 | 58  | 924  | 103.9 | 7.18  |
| B0QZL5   | Phosphatidylinositol 4,5-<br>bisphosphate 3-kinase<br>catalytic subunit delta<br>isoform OS=Mus musculus<br>GN=Plk3cd PE=2 SV=1 -<br>[B0QZL5_MOUSE] | 2.31  | 10 | 1  | 3  | 9   | 0.889 | 1.307 | 0.980 | 1.078 | 12.40   | 2.31  | 5  | 9   | 1040 | 119.3 | 7.34  |
| E9Q6Y8   | Ubiquitin carboxyl-terminal<br>hydrolase OS=Mus<br>musculus GN=Usp31 PE=2<br>SV=1 - [E9Q6Y8_MOUSE]                                                  | 21.50 | 1  | 21 | 21 | 80  | 0.914 | 0.804 | 1.369 | 1.078 | 199.93  | 21.50 | 35 | 80  | 1344 | 146.2 | 9.17  |
| O35874   | Neutral amino acid<br>transporter A OS=Mus<br>musculus GN=Slc1a4<br>PE=1 SV=1 -                                                                     | 23.50 | 2  | 9  | 11 | 61  | 0.596 | 0.908 | 0.865 | 1.078 | 156.82  | 23.50 | 19 | 61  | 532  | 56.0  | 5.87  |
| E9Q2X2   | Neurexin-3 OS=Mus<br>musculus GN=Nrx3 PE=2<br>SV=1 - [E9Q2X2_MOUSE]                                                                                 | 33.50 | 1  | 3  | 40 | 159 | 0.861 | 0.975 | 0.863 | 1.078 | 509.10  | 33.50 | 72 | 159 | 1391 | 153.5 | 5.77  |
| P61205   | ADP-ribosylation factor 3<br>OS=Mus musculus<br>GN=Arf3 PE=2 SV=2 -<br>[ARF3_MOUSE]                                                                 | 67.40 | 5  | 2  | 12 | 275 | 1.039 | 1.322 | 1.020 | 1.078 | 749.67  | 67.40 | 20 | 275 | 181  | 20.6  | 7.43  |
| Q68FF6   | ARF GTPase-activating<br>protein GIT1 OS=Mus<br>musculus GN=Git1 PE=1<br>SV=1 - [GIT1_MOUSE]                                                        | 57.01 | 5  | 33 | 36 | 150 | 0.585 | 1.130 | 1.207 | 1.078 | 448.32  | 57.01 | 60 | 150 | 770  | 85.2  | 6.93  |

|          |                                                                                                                           |       |    |    |    |     |       |       |       |       |         |       |    |     |      |       |      |
|----------|---------------------------------------------------------------------------------------------------------------------------|-------|----|----|----|-----|-------|-------|-------|-------|---------|-------|----|-----|------|-------|------|
| G3UY87   | PCTP-like protein (Fragment) OS=Mus musculus GN=Stard10 PE=4 SV=1 -                                                       | 13.43 | 8  | 4  | 4  | 8   | 0.858 | 0.835 | 0.810 | 1.078 | 24.90   | 13.43 | 5  | 8   | 283  | 31.6  | 8.70 |
| P17156   | Heat shock-related 70 kDa protein 2 OS=Mus musculus GN=Hspa2 PE=1 SV=2 - [HSP72_MOUSE]                                    | 59.40 | 1  | 20 | 40 | 852 | 0.917 | 2.344 | 1.224 | 1.078 | 2313.73 | 59.40 | 74 | 852 | 633  | 69.6  | 5.67 |
| Q8BYZ7-2 | Isoform 2 of Engulfment and cell motility protein 3 OS=Mus musculus GN=Elmo3 - [ELMO3_MOUSE]                              | 7.25  | 2  | 3  | 4  | 5   | 1.051 | 1.066 | 1.089 | 1.078 | 8.25    | 7.25  | 4  | 5   | 607  | 69.2  | 6.30 |
| Q9D4H8   | Cullin-2 OS=Mus musculus GN=Cul2 PE=1 SV=2 - [CUL2_MOUSE]                                                                 | 38.52 | 4  | 28 | 29 | 97  | 0.697 | 0.933 | 0.947 | 1.078 | 289.01  | 38.52 | 51 | 97  | 745  | 86.8  | 7.01 |
| Q92019   | WD repeat-containing protein 7 OS=Mus musculus GN=Wdr7 PE=1 SV=3 - [WDR7_MOUSE]                                           | 40.36 | 2  | 47 | 47 | 238 | 0.553 | 1.083 | 1.050 | 1.078 | 728.94  | 40.36 | 83 | 238 | 1489 | 163.3 | 6.90 |
| Q8BG94   | COMM domain-containing protein 7 OS=Mus musculus GN=Comm7 PE=2 SV=1 -                                                     | 24.00 | 2  | 3  | 3  | 10  | 0.745 | 0.838 | 1.021 | 1.078 | 28.38   | 24.00 | 6  | 10  | 200  | 22.6  | 5.94 |
| Q60769   | Tumor necrosis factor alpha-induced protein 3 OS=Mus musculus GN=Tnfrsf3 PE=1 SV=2 - [TNFR3_MOUSE]                        | 1.55  | 1  | 1  | 1  | 2   | 1.070 | 1.572 | 1.417 | 1.078 | 2.66    | 1.55  | 2  | 2   | 775  | 87.6  | 8.16 |
| Q9R111   | Guanine deaminase OS=Mus musculus GN=Gda PE=1 SV=1 - [GUAD_MOUSE]                                                         | 68.06 | 2  | 26 | 26 | 237 | 0.948 | 2.831 | 1.109 | 1.078 | 662.56  | 68.06 | 47 | 237 | 454  | 51.0  | 5.53 |
| Q99K74-2 | Isoform 2 of Mediator of RNA polymerase II transcription subunit 24 OS=Mus musculus GN=Med24 - [MED24_MOUSE]              | 4.18  | 4  | 3  | 3  | 5   | 0.512 | 0.881 | 0.869 | 1.078 | 17.81   | 4.18  | 5  | 5   | 956  | 105.9 | 6.79 |
| P02089   | Hemoglobin subunit beta-2 OS=Mus musculus GN=Hbb-b2 PE=1 SV=2 - [HBB2_MOUSE]                                              | 85.03 | 2  | 5  | 14 | 904 | 1.579 | 7.987 | 1.146 | 1.079 | 2507.89 | 85.03 | 28 | 904 | 147  | 15.9  | 8.05 |
| Q8R5C5   | Beta-centractin OS=Mus musculus GN=Actr1b PE=1 SV=1 - [ACTY_MOUSE]                                                        | 56.12 | 3  | 9  | 17 | 101 | 0.720 | 0.983 | 1.071 | 1.079 | 297.29  | 56.12 | 30 | 101 | 376  | 42.3  | 6.40 |
| O88322   | Nidogen-2 OS=Mus musculus GN=Nid2 PE=1 SV=2 - [NID2_MOUSE]                                                                | 11.76 | 1  | 11 | 11 | 35  | 1.537 | 1.447 | 1.136 | 1.079 | 124.02  | 11.76 | 20 | 35  | 1403 | 153.8 | 5.38 |
| O70496   | H(+)/Cl(-) exchange transporter 7 OS=Mus musculus GN=Cln7 PE=1 SV=1 - [CLCN7_MOUSE]                                       | 13.20 | 3  | 8  | 8  | 27  | 0.915 | 0.839 | 0.874 | 1.079 | 61.49   | 13.20 | 12 | 27  | 803  | 88.7  | 7.27 |
| Q9D8Z1   | Activating signal cointegrator 1 complex subunit 1 OS=Mus musculus GN=Ascc1 PE=2 SV=1 - [ASCC1_MOUSE]                     | 8.71  | 1  | 3  | 3  | 5   | 0.846 | 1.004 | 0.893 | 1.079 | 13.92   | 8.71  | 5  | 5   | 356  | 41.3  | 6.54 |
| E9PYX5   | Probable cation-transporting ATPase 13A2 (Fragment) OS=Mus musculus GN=Atp13a2 PE=2 SV=1 - [ATP13A2_MOUSE]                | 2.16  | 3  | 1  | 2  | 2   | 0.591 | 0.799 | 1.042 | 1.079 | 5.43    | 2.16  | 2  | 2   | 970  | 104.9 | 7.91 |
| Q3SXD3   | HD domain-containing protein 2 OS=Mus musculus GN=Hddc2 PE=2 SV=1 - [HDDC2_MOUSE]                                         | 31.16 | 2  | 4  | 4  | 20  | 1.044 | 1.098 | 1.040 | 1.079 | 69.59   | 31.16 | 8  | 20  | 199  | 22.7  | 5.02 |
| Q9WUR2-2 | Isoform 2 of Enoyl-CoA delta isomerase 2, mitochondrial OS=Mus musculus GN=Eci2 - [ECI2_MOUSE]                            | 37.15 | 11 | 11 | 11 | 57  | 0.856 | 1.208 | 0.903 | 1.079 | 154.16  | 37.15 | 19 | 57  | 358  | 39.5  | 8.43 |
| A6H5Z3   | Exocyst complex component 6B OS=Mus musculus GN=Exoc6b PE=2 SV=1 -                                                        | 35.80 | 4  | 23 | 25 | 56  | 0.601 | 1.475 | 1.053 | 1.079 | 170.38  | 35.80 | 41 | 56  | 810  | 94.1  | 6.39 |
| Q8K3J1   | NADH dehydrogenase [ubiquinone] iron-sulfur protein 8, mitochondrial OS=Mus musculus GN=Ndufs8 PE=1 SV=1 - [NDUFS8_MOUSE] | 32.08 | 1  | 6  | 6  | 57  | 1.003 | 1.133 | 1.015 | 1.079 | 130.50  | 32.08 | 11 | 57  | 212  | 24.0  | 6.21 |
| Q92511   | ATPase family AAA domain-containing protein 3 OS=Mus musculus GN=Atad3 PE=1 SV=1 - [ATAD3_MOUSE]                          | 47.88 | 5  | 25 | 26 | 106 | 0.760 | 0.908 | 0.917 | 1.079 | 324.21  | 47.88 | 44 | 106 | 591  | 66.7  | 9.29 |
| D6RIQ3   | Phytanoyl-CoA dioxygenase domain-containing protein 1 OS=Mus musculus GN=Phyh1 PE=2 SV=1 - [PHYH1_MOUSE]                  | 21.38 | 6  | 3  | 3  | 11  | 1.328 | 0.991 | 0.958 | 1.079 | 32.42   | 21.38 | 6  | 11  | 159  | 18.0  | 6.68 |
| P56974-2 | Isoform DON-1M of Pro-neuregulin-2, membrane-bound isoform OS=Mus musculus GN=Nrg2 - [NRG2_MOUSE]                         | 2.52  | 4  | 1  | 1  | 3   | 1.064 | 0.903 | 1.053 | 1.079 | 13.02   | 2.52  | 2  | 3   | 754  | 82.0  | 9.19 |
| P97329   | Kinesin-like protein KIF20A OS=Mus musculus GN=Kif20a PE=2 SV=1 - [KIF20A_MOUSE]                                          | 5.19  | 1  | 2  | 4  | 9   | 1.721 | 0.819 | 1.072 | 1.079 | 22.15   | 5.19  | 4  | 9   | 887  | 99.8  | 6.99 |
| Q09200   | Beta-1,4 N-acetylgalactosaminyltransferase 1 OS=Mus musculus GN=B4galnt1 PE=2 SV=1 - [B4GN1_MOUSE]                        | 12.01 | 1  | 6  | 7  | 12  | 0.911 | 1.039 | 1.132 | 1.079 | 31.26   | 12.01 | 10 | 12  | 533  | 59.2  | 8.59 |

|          |                                                                                                            |       |    |    |    |      |        |       |       |       |         |       |     |      |      |       |       |
|----------|------------------------------------------------------------------------------------------------------------|-------|----|----|----|------|--------|-------|-------|-------|---------|-------|-----|------|------|-------|-------|
| Q80X95   | Ras-related GTP-binding protein A OS=Mus musculus GN=Rraga PE=2 SV=1 - [RRAGA_MOUSE]                       | 32.59 | 3  | 3  | 11 | 31   | 0.464  | 0.935 | 0.905 | 1.079 | 108.10  | 32.59 | 19  | 31   | 313  | 36.5  | 7.72  |
| P47739   | Aldehyde dehydrogenase, dimeric NADP-prefering OS=Mus musculus GN=Aldh3a1 PE=2 SV=2 - [AL3A1_MOUSE]        | 9.71  | 1  | 3  | 5  | 9    | 1.074  | 1.179 | 1.079 | 1.080 | 21.25   | 9.71  | 7   | 9    | 453  | 50.4  | 6.95  |
| P08249   | Malate dehydrogenase, mitochondrial OS=Mus musculus GN=Mdh2 PE=1 SV=3 - [MDHM_MOUSE]                       | 75.44 | 1  | 29 | 29 | 1483 | 1.951  | 1.067 | 0.947 | 1.080 | 4515.14 | 75.44 | 57  | 1483 | 338  | 35.6  | 8.68  |
| Q99F31   | Hsp70-binding protein 1 OS=Mus musculus GN=Hspbp1 PE=2 SV=1 - [HBP1_MOUSE]                                 | 30.81 | 1  | 8  | 8  | 22   | 0.890  | 0.938 | 0.861 | 1.080 | 70.26   | 30.81 | 13  | 22   | 357  | 39.1  | 5.36  |
| Q9EP89   | Serine beta-lactamase-like protein LACTB, mitochondrial OS=Mus musculus GN=Lactb PE=1 SV=1 - [LACTB_MOUSE] | 21.42 | 1  | 12 | 12 | 31   | 0.784  | 1.285 | 1.395 | 1.080 | 90.14   | 21.42 | 17  | 31   | 551  | 60.7  | 8.90  |
| Q6IMP4-2 | Isoform 2 of Pannexin-2 OS=Mus musculus GN=Pannx2 - [PANX2_MOUSE]                                          | 12.90 | 2  | 5  | 6  | 12   | 1.039  | 0.617 | 0.910 | 1.080 | 40.44   | 12.90 | 9   | 12   | 651  | 71.6  | 8.69  |
| Q3U2J5   | Calmodulin-lysine N-methyltransferase OS=Mus musculus GN=Camkmt PE=1 SV=1 - [CMKMT_MOUSE]                  | 19.50 | 2  | 6  | 6  | 13   | 0.912  | 1.051 | 0.963 | 1.080 | 41.30   | 19.50 | 9   | 13   | 323  | 35.9  | 7.47  |
| G3X8X1   | RIKEN cDNA 2810439F02 OS=Mus musculus GN=Ttc39c PE=4 SV=1 - [G3X8X1_MOUSE]                                 | 9.83  | 3  | 6  | 6  | 16   | 0.821  | 1.240 | 1.026 | 1.080 | 46.02   | 9.83  | 12  | 16   | 580  | 65.4  | 6.87  |
| Q8K330   | Protein phosphatase Slingshot homolog 3 OS=Mus musculus GN=Ssh3 PE=1 SV=1 - [SSH3_MOUSE]                   | 7.70  | 6  | 4  | 5  | 11   | 1.162  | 0.973 | 1.032 | 1.080 | 30.77   | 7.70  | 8   | 11   | 649  | 72.2  | 5.57  |
| Q3KNK3   | NADH-cytochrome b5 reductase 2 OS=Mus musculus GN=Cybb2 PE=2 SV=2 - [CYBB2_MOUSE]                          | 10.87 | 2  | 2  | 2  | 2    | 13.157 | 1.199 | 1.334 | 1.080 | 4.29    | 10.87 | 2   | 2    | 276  | 31.3  | 6.76  |
| P51830   | Adenylate cyclase type 9 OS=Mus musculus GN=Adcy9 PE=1 SV=1 - [ADCY9_MOUSE]                                | 22.62 | 2  | 29 | 29 | 87   | 0.626  | 0.908 | 1.220 | 1.080 | 219.94  | 22.62 | 46  | 87   | 1353 | 150.9 | 7.21  |
| P49615   | Cyclin-dependent kinase 5 OS=Mus musculus GN=Cdk5 PE=1 SV=1 - [CDK5_MOUSE]                                 | 54.79 | 15 | 13 | 15 | 86   | 0.547  | 0.917 | 1.001 | 1.080 | 229.19  | 54.79 | 27  | 86   | 292  | 33.3  | 7.66  |
| P54320   | Elastin OS=Mus musculus GN=Elin PE=2 SV=2 - [ELN_MOUSE]                                                    | 12.33 | 1  | 4  | 4  | 9    | 0.448  | 0.827 | 0.928 | 1.080 | 21.38   | 12.33 | 5   | 9    | 860  | 71.9  | 10.43 |
| E9QP54   | Joubertin OS=Mus musculus GN=Ahi1 PE=2 SV=1 - [E9QP54_MOUSE]                                               | 55.01 | 4  | 49 | 50 | 242  | 0.859  | 1.013 | 0.661 | 1.080 | 677.90  | 55.01 | 82  | 242  | 1047 | 119.6 | 7.20  |
| P61329-2 | Isoform 2 of Fibroblast growth factor 12 OS=Mus musculus GN=Fgf12 - [FGF12_MOUSE]                          | 45.30 | 5  | 8  | 8  | 36   | 1.187  | 0.826 | 1.150 | 1.081 | 117.51  | 45.30 | 15  | 36   | 181  | 20.4  | 8.87  |
| Q80WG5   | Leucine-rich repeat-containing protein 8A OS=Mus musculus GN=Lrrc8a PE=1 SV=1 - [LRC8A_MOUSE]              | 30.12 | 1  | 17 | 19 | 46   | 0.770  | 0.815 | 0.838 | 1.081 | 136.80  | 30.12 | 32  | 46   | 810  | 94.1  | 7.94  |
| Q78JE5   | F-box only protein 22 OS=Mus musculus GN=Fbxo22 PE=2 SV=2 - [FBX22_MOUSE]                                  | 24.13 | 4  | 7  | 8  | 15   | 0.696  | 1.059 | 0.907 | 1.081 | 50.73   | 24.13 | 12  | 15   | 402  | 44.2  | 7.61  |
| Q91X78   | Erlin-1 OS=Mus musculus GN=Erlin1 PE=1 SV=1 - [ERLN1_MOUSE]                                                | 26.88 | 2  | 6  | 10 | 46   | 0.887  | 1.630 | 1.269 | 1.081 | 122.66  | 26.88 | 18  | 46   | 346  | 38.9  | 7.21  |
| Q9QZQ8-2 | Isoform 1 of Core histone macro-H2A.1 OS=Mus musculus GN=H2afy - [H2AY_MOUSE]                              | 44.99 | 2  | 13 | 15 | 85   | 0.377  | 0.828 | 0.772 | 1.081 | 283.94  | 44.99 | 26  | 85   | 369  | 39.3  | 9.83  |
| H7BX79   | Coiled-coil domain-containing protein 162 OS=Mus musculus GN=Ccdc162 PE=2 SV=2 - [H7BX79_MOUSE]            | 7.76  | 7  | 5  | 5  | 9    | 7.951  | 3.140 | 2.087 | 1.081 | 13.83   | 7.76  | 5   | 9    | 722  | 83.4  | 8.10  |
| Q03719   | Potassium voltage-gated channel subfamily D member 1 OS=Mus musculus GN=Kcnd1 PE=1 SV=1 - [KCND1_MOUSE]    | 8.14  | 1  | 4  | 5  | 6    | 0.985  | 0.783 | 1.168 | 1.081 | 9.85    | 8.14  | 6   | 6    | 651  | 71.7  | 8.21  |
| Q76KF0-3 | Isoform 2 of Semaphorin-6D OS=Mus musculus GN=Sema6d - [SEM6D_MOUSE]                                       | 7.21  | 7  | 7  | 7  | 13   | 1.056  | 1.071 | 1.007 | 1.081 | 39.42   | 7.21  | 9   | 13   | 998  | 111.7 | 8.66  |
| Q9QZX7-2 | Isoform 2 of Serine racemase OS=Mus musculus GN=Srr - [SRR_MOUSE]                                          | 46.82 | 4  | 10 | 10 | 60   | 0.453  | 2.289 | 1.729 | 1.081 | 225.86  | 46.82 | 19  | 60   | 314  | 34.0  | 6.01  |
| E0CZ01   | von Willebrand factor A domain-containing protein 5B2 OS=Mus musculus GN=Vvasb2 PE=2 SV=1 - [E0CZ01_MOUSE] | 3.21  | 4  | 3  | 4  | 14   | 0.949  | 0.965 | 0.936 | 1.081 | 38.42   | 3.21  | 6   | 14   | 1248 | 133.3 | 6.25  |
| Q775J2   | Microtubule-associated protein 6 OS=Mus musculus GN=Map6 PE=1 SV=2 - [MAP6_MOUSE]                          | 80.46 | 3  | 56 | 74 | 903  | 1.354  | 0.850 | 1.397 | 1.081 | 2442.24 | 80.46 | 140 | 903  | 906  | 96.4  | 9.50  |

|          |                                                                                                                |       |   |    |    |     |       |       |       |       |        |       |    |     |      |       |      |
|----------|----------------------------------------------------------------------------------------------------------------|-------|---|----|----|-----|-------|-------|-------|-------|--------|-------|----|-----|------|-------|------|
| Q61206   | Platelet-activating factor acetylhydrolase IB subunit beta OS=Mus musculus GN=Pafah1b2 PE=1 SV=2 [PA1B2_MOUSE] | 45.85 | 1 | 6  | 7  | 86  | 1.265 | 1.083 | 1.038 | 1.081 | 287.70 | 45.85 | 11 | 86  | 229  | 25.6  | 5.92 |
| Q9Z1G3   | V-type proton ATPase subunit C 1 OS=Mus musculus GN=Atp6v1c1 PE=1 SV=4                                         | 77.75 | 5 | 33 | 33 | 234 | 0.615 | 1.287 | 1.032 | 1.081 | 620.23 | 77.75 | 58 | 234 | 382  | 43.9  | 7.46 |
| Q99LB6-2 | Isoform 2 of Methionine adenosyltransferase 2 subunit beta OS=Mus musculus GN=Mat2b - [MAT2B_MOUSE]            | 44.89 | 3 | 13 | 13 | 41  | 1.069 | 1.240 | 1.229 | 1.081 | 128.78 | 44.89 | 23 | 41  | 323  | 36.2  | 6.60 |
| P47791   | Glutathione reductase, mitochondrial OS=Mus musculus GN=Gsr PE=2 SV=3 - [GSHR_MOUSE]                           | 43.40 | 2 | 18 | 18 | 65  | 1.850 | 1.192 | 1.250 | 1.081 | 230.60 | 43.40 | 31 | 65  | 500  | 53.6  | 7.99 |
| Q9D7N9   | Adipocyte plasma membrane-associated protein OS=Mus musculus GN=Apmmap PE=1 SV=1 - [APMAP_MOUSE]               | 53.98 | 1 | 20 | 20 | 62  | 0.807 | 1.021 | 0.943 | 1.082 | 192.54 | 53.98 | 33 | 62  | 415  | 46.4  | 6.32 |
| P62835   | Ras-related protein Rap-1A OS=Mus musculus GN=Rap1a PE=2 SV=1 - [RAP1A_MOUSE]                                  | 64.13 | 1 | 3  | 9  | 109 | 0.875 | 0.489 | 0.957 | 1.082 | 306.44 | 64.13 | 17 | 109 | 184  | 21.0  | 6.67 |
| P06800-3 | Isoform 3 of Receptor-type tyrosine-protein phosphatase C OS=Mus musculus GN=Ptprc - [PTPRC_MOUSE]             | 0.95  | 3 | 1  | 1  | 3   | 0.936 | 1.510 | 1.092 | 1.082 | 9.72   | 0.95  | 2  | 3   | 1152 | 130.5 | 6.33 |
| Q99JT1   | Glutamy-tRNA(Gln) amidotransferase subunit B, mitochondrial OS=Mus musculus GN=Pet112 PE=2 SV=1 [GATB_MOUSE]   | 31.06 | 3 | 13 | 13 | 38  | 1.039 | 0.950 | 1.036 | 1.082 | 106.25 | 31.06 | 19 | 38  | 557  | 62.1  | 8.54 |
| P27671   | Ras-specific guanine nucleotide-releasing factor 1 OS=Mus musculus GN=Rasgrf1 PE=1 SV=2 - [RGRF1_MOUSE]        | 27.97 | 2 | 27 | 33 | 81  | 0.641 | 0.919 | 0.877 | 1.082 | 249.54 | 27.97 | 47 | 81  | 1262 | 144.0 | 7.17 |
| P24161   | T-cell surface glycoprotein CD3 zeta chain OS=Mus musculus GN=Cd247 PE=1 SV=1 - [CD3Z_MOUSE]                   | 6.71  | 5 | 1  | 1  | 1   | 1.205 | 0.804 | 0.837 | 1.082 | 0.00   | 6.71  | 1  | 1   | 164  | 18.6  | 9.28 |
| Q6PD31   | Trafficking kinesin-binding protein 1 OS=Mus musculus GN=Trak1 PE=1 SV=1 - [TRAK1_MOUSE]                       | 10.22 | 2 | 7  | 7  | 14  | 2.175 | 1.442 | 1.145 | 1.082 | 33.77  | 10.22 | 10 | 14  | 939  | 104.4 | 5.78 |
| Q9Z0S9   | Prenylated Rab acceptor protein 1 OS=Mus musculus GN=Rabac1 PE=1 SV=1                                          | 24.32 | 1 | 4  | 4  | 14  | 0.610 | 0.815 | 0.761 | 1.082 | 38.34  | 24.32 | 7  | 14  | 185  | 20.6  | 7.90 |
| Q7TPD0   | Integrator complex subunit 3 OS=Mus musculus GN=Ints3 PE=1 SV=2 - [INT3_MOUSE]                                 | 5.76  | 2 | 4  | 5  | 9   | 0.703 | 1.133 | 1.325 | 1.082 | 34.08  | 5.76  | 8  | 9   | 1041 | 117.9 | 5.80 |
| Q5RKZ7   | Molybdenum cofactor biosynthesis protein 1 OS=Mus musculus GN=Mocs1 PE=2 SV=2 - [MOCS1_MOUSE]                  | 10.38 | 6 | 4  | 5  | 9   | 1.298 | 1.318 | 1.081 | 1.082 | 13.08  | 10.38 | 7  | 9   | 636  | 69.8  | 9.14 |
| P70388-2 | Isoform 2 of DNA repair protein RAD50 OS=Mus musculus GN=Rad50 - [RAD50_MOUSE]                                 | 6.16  | 7 | 6  | 8  | 16  | 1.490 | 1.142 | 1.505 | 1.082 | 35.93  | 6.16  | 14 | 16  | 1251 | 146.2 | 7.05 |
| Q3V460   | Gene model 561, (NCBI) OS=Mus musculus GN=Gm561 PE=4 SV=1 - [Q3V460_MOUSE]                                     | 15.89 | 1 | 2  | 2  | 3   | 0.846 | 0.905 | 1.054 | 1.082 | 7.76   | 15.89 | 3  | 3   | 107  | 12.0  | 5.19 |
| Q7TNI2   | Transmembrane protein 59 like OS=Mus musculus GN=Tmem59l PE=2 SV=1 [TM59L_MOUSE]                               | 9.79  | 1 | 3  | 3  | 5   | 0.616 | 1.046 | 0.775 | 1.082 | 17.61  | 9.79  | 4  | 5   | 337  | 37.6  | 7.69 |
| Q99L27   | GMP reductase 2 OS=Mus musculus GN=Gmpr2 PE=2 SV=2 - [GMPR2_MOUSE]                                             | 24.43 | 1 | 5  | 7  | 30  | 1.667 | 0.824 | 0.832 | 1.082 | 89.07  | 24.43 | 13 | 30  | 348  | 38.0  | 7.44 |
| A2AKS7   | Cadherin 17, isoform CRA_a OS=Mus musculus GN=Cdh17 PE=4 SV=1 - [A2AKS7_MOUSE]                                 | 2.88  | 2 | 1  | 1  | 1   | 3.985 | 1.240 | 0.702 | 1.082 | 3.46   | 2.88  | 1  | 1   | 728  | 80.6  | 4.70 |
| Q0PD20   | Rab34 OS=Mus musculus GN=Rab34 PE=2 SV=1 - [Q0PD20_MOUSE]                                                      | 22.01 | 5 | 5  | 6  | 17  | 0.654 | 0.647 | 0.752 | 1.082 | 51.73  | 22.01 | 9  | 17  | 259  | 29.1  | 8.27 |
| Q8QZT2   | Centriole, cilia and spindle-associated protein OS=Mus musculus GN=Ccsap PE=2 SV=1 - [CCSAP_MOUSE]             | 27.38 | 1 | 6  | 6  | 20  | 0.975 | 1.610 | 3.031 | 1.082 | 53.46  | 27.38 | 11 | 20  | 252  | 28.4  | 9.22 |
| P55144-3 | Isoform 1 of Tyrosine-protein kinase receptor TYRO3 OS=Mus musculus GN=Tyro3 [TYRO3_MOUSE]                     | 13.13 | 3 | 10 | 10 | 23  | 1.284 | 0.872 | 1.802 | 1.082 | 66.82  | 13.13 | 17 | 23  | 876  | 96.0  | 5.60 |
| Q8BQR7   | MCG61680 OS=Mus musculus GN=Mageb18 PE=2 SV=1 - [Q8BQR7_MOUSE]                                                 | 3.06  | 1 | 1  | 1  | 1   | 1.397 | 1.484 | 1.233 | 1.083 | 2.78   | 3.06  | 1  | 1   | 327  | 37.2  | 6.90 |
| Q8BJW5-2 | Isoform 2 of Nucleolar protein 11 OS=Mus musculus GN=Nol11 - [NOL11_MOUSE]                                     | 3.27  | 2 | 2  | 2  | 2   | 0.667 | 0.620 | 0.935 | 1.083 | 4.17   | 3.27  | 2  | 2   | 703  | 78.5  | 6.21 |

|          |                                                                                                                  |       |   |    |    |     |       |       |       |       |        |       |     |     |      |       |       |
|----------|------------------------------------------------------------------------------------------------------------------|-------|---|----|----|-----|-------|-------|-------|-------|--------|-------|-----|-----|------|-------|-------|
| MQQW7    | Ubiquitin carboxyl-terminal hydrolase OS=Mus musculus GN=Usp35 PE=3 SV=1 - [MQQW7_MOUSE]                         | 12.39 | 2 | 9  | 10 | 28  | 0.713 | 0.879 | 0.955 | 1.083 | 73.16  | 12.39 | 17  | 28  | 1009 | 112.4 | 6.16  |
| Q8BU85   | Methionine-R-sulfoxide reductase B3, mitochondrial OS=Mus musculus GN=MsrB3 PE=1 SV=2 - [MSRB3_MOUSE]            | 3.56  | 1 | 1  | 1  | 2   | 1.837 | 1.438 | 1.033 | 1.083 | 5.26   | 3.56  | 2   | 2   | 253  | 26.8  | 7.99  |
| Q3V3A3   | MCG22200, isoform CRA_b OS=Mus musculus GN=Gpr165 PE=2 SV=1 - [Q3V3A3_MOUSE]                                     | 6.15  | 1 | 2  | 2  | 8   | 1.237 | 1.370 | 0.950 | 1.083 | 24.86  | 6.15  | 3   | 8   | 455  | 51.0  | 7.33  |
| Q91YM4-2 | isoform 2 of Protein TBRG4 OS=Mus musculus GN=Tbrg4 - [TBRG4_MOUSE]                                              | 20.00 | 5 | 8  | 8  | 29  | 0.698 | 0.867 | 0.996 | 1.083 | 95.15  | 20.00 | 14  | 29  | 600  | 68.1  | 8.32  |
| Q99NF7   | Ppm1b protein OS=Mus musculus GN=Ppm1b PE=2 SV=1 - [Q99NF7_MOUSE]                                                | 34.80 | 5 | 1  | 14 | 102 | 0.964 | 1.064 | 1.036 | 1.083 | 281.58 | 34.80 | 26  | 102 | 477  | 52.1  | 5.11  |
| O35902-2 | isoform 2 of Desmoglein-3 OS=Mus musculus GN=Dsg3 - [DSG3_MOUSE]                                                 | 1.72  | 3 | 1  | 2  | 2   | 2.112 | 1.368 | 0.948 | 1.083 | 5.14   | 1.72  | 2   | 2   | 929  | 101.3 | 4.98  |
| Q8R278   | Protein Vmn1r213 OS=Mus musculus GN=Vmn1r213 PE=4 SV=1 - [Q8R278_MOUSE]                                          | 1.82  | 1 | 1  | 1  | 1   | 1.532 | 0.779 | 0.968 | 1.083 | 2.22   | 1.82  | 1   | 1   | 384  | 44.2  | 9.19  |
| Q56A10-2 | isoform 2 of Zinc finger protein 608 OS=Mus musculus GN=Znf608 - [ZNF608_MOUSE]                                  | 0.62  | 2 | 1  | 1  | 2   | 1.368 | 1.076 | 1.095 | 1.083 | 2.41   | 0.62  | 1   | 2   | 1455 | 155.9 | 8.79  |
| Q8BMD5-3 | isoform 3 of Cytidine and dCMP deaminase domain-containing protein 1 OS=Mus musculus GN=Cdad1 - [CDAD1_MOUSE]    | 4.83  | 6 | 2  | 2  | 6   | 0.921 | 0.643 | 0.941 | 1.083 | 20.27  | 4.83  | 3   | 6   | 497  | 56.1  | 6.79  |
| E9PXL4   | Gamma-aminobutyric acid receptor subunit alpha-1 (Fragment) OS=Mus musculus GN=Gabra1 PE=2 SV=1 - [GABRA1_MOUSE] | 8.33  | 1 | 1  | 1  | 1   | 1.644 | 1.186 | 1.295 | 1.083 | 2.54   | 8.33  | 1   | 1   | 132  | 14.5  | 11.19 |
| Q791V5   | Mitochondrial carrier homolog 2 OS=Mus musculus GN=Mtch2 PE=1 SV=1 - [MTCH2_MOUSE]                               | 26.40 | 3 | 7  | 7  | 37  | 0.599 | 1.117 | 0.985 | 1.083 | 107.18 | 26.40 | 12  | 37  | 303  | 33.5  | 8.25  |
| Q8BX70-3 | isoform 3 of Vacuolar protein sorting-associated protein 13C OS=Mus musculus GN=Vps13c - [VP13C_MOUSE]           | 24.46 | 4 | 75 | 76 | 185 | 0.952 | 0.891 | 0.971 | 1.083 | 512.84 | 24.46 | 116 | 185 | 3708 | 415.0 | 6.77  |
| P49117   | Nuclear receptor subfamily 2 group C member 2 OS=Mus musculus GN=Nr2c2 PE=1 SV=1 - [NR2C2_MOUSE]                 | 9.90  | 2 | 4  | 4  | 6   | 1.392 | 2.066 | 1.134 | 1.083 | 16.90  | 9.90  | 5   | 6   | 596  | 65.2  | 6.28  |
| Q9ERK7   | Neuronal acetylcholine receptor subunit beta-2 OS=Mus musculus GN=Chrb2 PE=2 SV=1 - [ACHB2_MOUSE]                | 15.57 | 2 | 5  | 5  | 9   | 1.085 | 1.040 | 0.877 | 1.084 | 22.01  | 15.57 | 7   | 9   | 501  | 57.1  | 7.03  |
| Q9QX66-3 | isoform 3 of Zinc finger protein neuro-d4 OS=Mus musculus GN=Dpf1 - [DPF1_MOUSE]                                 | 8.73  | 6 | 2  | 2  | 2   | 2.849 | 1.707 | 0.543 | 1.084 | 4.73   | 8.73  | 2   | 2   | 332  | 37.9  | 7.23  |
| O88543   | COP9 signalosome complex subunit 3 OS=Mus musculus GN=Cops3 PE=1 SV=3 - [COPS3_MOUSE]                            | 43.50 | 3 | 14 | 14 | 83  | 0.856 | 1.047 | 0.958 | 1.084 | 250.12 | 43.50 | 26  | 83  | 423  | 47.8  | 6.65  |
| Q80YF9   | Rho GTPase-activating protein 33 OS=Mus musculus GN=Arhgap33 PE=1 SV=1 - [ARHAP33_MOUSE]                         | 14.10 | 1 | 13 | 14 | 32  | 0.906 | 1.541 | 1.484 | 1.084 | 101.82 | 14.10 | 20  | 32  | 1305 | 139.7 | 9.19  |
| D3Z001   | Protein 2310057118rik OS=Mus musculus GN=2310057118rik PE=4 SV=1 - [D3Z001_MOUSE]                                | 10.16 | 2 | 1  | 1  | 1   | 0.794 | 0.838 | 1.018 | 1.084 | 2.19   | 10.16 | 1   | 1   | 246  | 28.1  | 4.27  |
| Q91V48   | MCG1033322 OS=Mus musculus GN=Pchb21 PE=2 SV=1 - [Q91V48_MOUSE]                                                  | 5.30  | 1 | 2  | 2  | 3   | 2.104 | 1.119 | 1.203 | 1.084 | 2.83   | 5.30  | 2   | 3   | 774  | 85.2  | 4.83  |
| Q8BVQ5   | Protein phosphatase methylesterase 1 OS=Mus musculus GN=Ppme1 PE=1 SV=5 - [PPME1_MOUSE]                          | 46.63 | 1 | 15 | 15 | 89  | 0.613 | 1.087 | 0.946 | 1.084 | 207.80 | 46.63 | 28  | 89  | 386  | 42.2  | 5.97  |
| Q8R4V2   | Dual specificity protein phosphatase 15 OS=Mus musculus GN=Dusp15 PE=2 SV=3 - [DUSP15_MOUSE]                     | 37.02 | 3 | 7  | 7  | 23  | 1.293 | 0.306 | 0.920 | 1.084 | 83.45  | 37.02 | 11  | 23  | 235  | 26.2  | 9.26  |
| P53994   | Ras-related protein Rab-2A OS=Mus musculus GN=Rab2a PE=1 SV=1 - [RAB2A_MOUSE]                                    | 67.45 | 3 | 6  | 13 | 141 | 1.311 | 1.071 | 1.004 | 1.084 | 410.24 | 67.45 | 26  | 141 | 212  | 23.5  | 6.54  |
| P08508   | Low affinity immunoglobulin gamma Fc region receptor III OS=Mus musculus GN=Fcgr3 PE=1 SV=1 - [FCGR3_MOUSE]      | 3.83  | 5 | 1  | 1  | 2   | 0.734 | 1.919 | 1.076 | 1.084 | 7.24   | 3.83  | 2   | 2   | 261  | 30.0  | 9.29  |
| Q91YNO   | Uncharacterized protein C12orf4 homolog OS=Mus musculus GN=D6Wsu163e PE=1 SV=1 - [CL004_MOUSE]                   | 20.65 | 1 | 9  | 9  | 26  | 0.476 | 0.890 | 0.922 | 1.084 | 57.26  | 20.65 | 15  | 26  | 552  | 63.6  | 6.18  |
| J3QPX8   | Uncharacterized protein OS=Mus musculus GN=Olf1187-ps1 PE=4 SV=1 - [J3QPX8_MOUSE]                                | 23.91 | 1 | 1  | 1  | 4   | 1.398 | 1.298 | 0.796 | 1.084 | 0.00   | 23.91 | 1   | 4   | 92   | 10.4  | 7.18  |

|          |                                                                                                                                                            |       |   |    |    |     |       |       |       |       |         |       |    |     |      |       |      |
|----------|------------------------------------------------------------------------------------------------------------------------------------------------------------|-------|---|----|----|-----|-------|-------|-------|-------|---------|-------|----|-----|------|-------|------|
| A3KGB4   | TBC1 domain family member 8B OS=Mus musculus GN=Tbc1d8b PE=2 SV=1 -                                                                                        | 3.32  | 1 | 2  | 3  | 17  | 0.545 | 1.640 | 0.829 | 1.084 | 27.65   | 3.32  | 4  | 17  | 1114 | 127.8 | 5.49 |
| D3Z7E5   | Glycogen synthase kinase-3 alpha OS=Mus musculus GN=Gsk3a PE=2 SV=1 - [D3Z7E5_MOUSE]                                                                       | 44.03 | 2 | 9  | 16 | 101 | 0.881 | 1.084 | 1.124 | 1.084 | 294.72  | 44.03 | 29 | 101 | 486  | 51.2  | 8.91 |
| Q7TNS5   | Protein B630019K06Rik OS=Mus musculus GN=B630019K06Rik PE=2 SV=1 - [Q7TNS5_MOUSE]                                                                          | 27.03 | 2 | 7  | 7  | 31  | 0.760 | 0.763 | 0.576 | 1.084 | 97.25   | 27.03 | 11 | 31  | 333  | 34.8  | 6.65 |
| P53690   | Matrix metalloproteinase-14 OS=Mus musculus GN=Mmp14 PE=2 SV=3 - [MMP14_MOUSE]                                                                             | 5.15  | 1 | 2  | 2  | 3   | 0.914 | 1.029 | 0.941 | 1.084 | 5.85    | 5.15  | 2  | 3   | 582  | 65.9  | 8.03 |
| P53395   | Lipoamide acyltransferase component of branched-chain alpha-keto acid dehydrogenase complex, mitochondrial OS=Mus musculus GN=Dbt PE=2 SV=2 - [ODB2_MOUSE] | 34.02 | 1 | 17 | 17 | 65  | 1.032 | 1.134 | 1.096 | 1.084 | 156.22  | 34.02 | 30 | 65  | 482  | 53.2  | 8.60 |
| D3Z6H3   | Dynactin 6, isoform CRA_b OS=Mus musculus GN=Dctn6 PE=4 SV=1 - [D3Z6H3_MOUSE]                                                                              | 31.89 | 4 | 3  | 5  | 19  | 0.873 | 0.911 | 1.096 | 1.084 | 57.53   | 31.89 | 9  | 19  | 185  | 20.0  | 6.38 |
| O88746   | Target of Myb protein 1 OS=Mus musculus GN=Tom1 PE=1 SV=1 - [TOM1_MOUSE]                                                                                   | 56.10 | 3 | 18 | 18 | 92  | 2.000 | 1.074 | 1.220 | 1.084 | 259.19  | 56.10 | 30 | 92  | 492  | 54.3  | 4.94 |
| O88602   | Voltage-dependent calcium channel gamma-2 subunit OS=Mus musculus GN=Cacng2 PE=1 SV=1 - [CCG2_MOUSE]                                                       | 29.72 | 1 | 6  | 7  | 51  | 0.632 | 0.648 | 1.024 | 1.084 | 176.57  | 29.72 | 13 | 51  | 323  | 35.9  | 8.98 |
| Q99K8    | von Willebrand factor A domain-containing protein 5A OS=Mus musculus GN=Vwa5a PE=1 SV=2 - [VMASA_MOUSE]                                                    | 35.69 | 2 | 20 | 23 | 74  | 1.027 | 0.931 | 0.836 | 1.084 | 217.98  | 35.69 | 39 | 74  | 793  | 87.1  | 6.58 |
| Q8K1M6   | Dynamin-1-like protein OS=Mus musculus GN=Dnm1l PE=1 SV=2 - [DNM1L_MOUSE]                                                                                  | 72.24 | 4 | 2  | 45 | 396 | 0.992 | 1.333 | 1.065 | 1.085 | 1122.31 | 72.24 | 81 | 396 | 742  | 82.6  | 7.05 |
| D3YUR7   | Lipoxygenase homology domain-containing protein 1 (Fragment) OS=Mus musculus GN=Loxhd1 PE=2 SV=1 - [LXHD1_MOUSE]                                           | 1.76  | 4 | 2  | 2  | 2   | 3.753 | 1.578 | 1.230 | 1.085 | 2.48    | 1.76  | 2  | 2   | 1478 | 168.6 | 5.14 |
| P46737   | Lys-63-specific deubiquitinase BRCC36 OS=Mus musculus GN=Brcc3 PE=2 SV=1 - [BRCC3_MOUSE]                                                                   | 29.55 | 5 | 8  | 8  | 21  | 0.870 | 1.086 | 0.972 | 1.085 | 66.58   | 29.55 | 14 | 21  | 291  | 33.3  | 5.83 |
| D3YY50   | Copper homeostasis protein cutC homolog (Fragment) OS=Mus musculus GN=Cutc PE=2 SV=1 - [D3YY50_MOUSE]                                                      | 26.77 | 3 | 5  | 5  | 8   | 1.470 | 1.508 | 1.115 | 1.085 | 27.18   | 26.77 | 7  | 8   | 254  | 27.1  | 6.68 |
| P28828   | Receptor-type tyrosine-protein phosphatase mu OS=Mus musculus GN=Ptpm PE=2 SV=2 - [PTPRM_MOUSE]                                                            | 8.82  | 1 | 8  | 12 | 31  | 1.563 | 0.993 | 1.080 | 1.085 | 74.80   | 8.82  | 20 | 31  | 1452 | 163.5 | 6.68 |
| Q61730   | Interleukin-1 receptor accessory protein OS=Mus musculus GN=Il1rap PE=1 SV=1 - [IL1AP_MOUSE]                                                               | 17.54 | 3 | 1  | 11 | 40  | 0.772 | 0.259 | 0.957 | 1.085 | 110.80  | 17.54 | 19 | 40  | 570  | 65.7  | 7.77 |
| Q9CRA7   | ATP synthase subunit s, mitochondrial OS=Mus musculus GN=Atp5s PE=2 SV=1 - [ATP5S_MOUSE]                                                                   | 26.50 | 1 | 5  | 5  | 16  | 0.958 | 1.589 | 0.883 | 1.085 | 47.17   | 26.50 | 10 | 16  | 200  | 23.3  | 8.06 |
| D6RIK0   | Prestin OS=Mus musculus GN=Slc26a5 PE=2 SV=1 - [D6RIK0_MOUSE]                                                                                              | 3.36  | 4 | 1  | 1  | 2   | 1.182 | 0.832 | 1.552 | 1.085 | 5.15    | 3.36  | 1  | 2   | 447  | 48.6  | 8.59 |
| P55258   | Ras-related protein Rab-8A OS=Mus musculus GN=Rab8a PE=1 SV=2 - [RAB8A_MOUSE]                                                                              | 56.04 | 1 | 4  | 13 | 110 | 1.051 | 0.833 | 1.026 | 1.085 | 307.70  | 56.04 | 23 | 110 | 207  | 23.7  | 9.07 |
| Q9D964   | Glycine amidinotransferase, mitochondrial OS=Mus musculus GN=Gatm PE=1 SV=1 - [GATM_MOUSE]                                                                 | 29.31 | 1 | 10 | 10 | 26  | 0.931 | 0.556 | 0.866 | 1.085 | 73.02   | 29.31 | 19 | 26  | 423  | 48.3  | 7.88 |
| Q91WT9-2 | Isoform 2 of Cystathionine beta-synthase OS=Mus musculus GN=Cbs - [CBS_MOUSE]                                                                              | 24.68 | 5 | 10 | 11 | 26  | 0.891 | 0.699 | 0.867 | 1.085 | 71.90   | 24.68 | 18 | 26  | 547  | 60.2  | 6.61 |
| P01635   | Ig kappa chain V-V region K2 (Fragment) OS=Mus musculus PE=1 SV=1 - [KV5A3_MOUSE]                                                                          | 8.70  | 1 | 1  | 1  | 2   | 2.883 | 4.349 | 0.766 | 1.085 | 5.70    | 8.70  | 2  | 2   | 115  | 12.6  | 8.31 |
| Q5XG73-2 | Isoform 2 of Acyl-CoA-binding domain-containing protein 5 OS=Mus musculus GN=Acbd5 - [ACBD5_MOUSE]                                                         | 16.95 | 4 | 7  | 7  | 18  | 1.045 | 0.908 | 0.939 | 1.085 | 61.00   | 16.95 | 12 | 18  | 472  | 52.3  | 5.29 |
| Q8K3B1   | F-box/SPRY domain-containing protein 1 OS=Mus musculus GN=Fbxo45 PE=1 SV=2 - [FBSP1_MOUSE]                                                                 | 29.37 | 1 | 6  | 6  | 10  | 1.057 | 1.259 | 1.072 | 1.085 | 17.39   | 29.37 | 8  | 10  | 286  | 30.6  | 7.85 |

|          |                                                                                                                               |       |    |    |    |      |       |       |       |       |         |       |    |      |      |       |       |
|----------|-------------------------------------------------------------------------------------------------------------------------------|-------|----|----|----|------|-------|-------|-------|-------|---------|-------|----|------|------|-------|-------|
| G3X8X7   | Vacuolar protein sorting 16 (Yeast) OS=Mus musculus GN=Vps16 PE=4 SV=1 - [G3X8X7_MOUSE]                                       | 24.79 | 4  | 16 | 16 | 36   | 0.639 | 0.825 | 0.976 | 1.085 | 141.14  | 24.79 | 24 | 36   | 839  | 94.8  | 6.92  |
| Q3TFQ1   | SPRY domain-containing protein 7 OS=Mus musculus GN=Spryd7 PE=2 SV=2 -                                                        | 36.22 | 2  | 6  | 6  | 33   | 0.856 | 0.895 | 0.874 | 1.085 | 93.95   | 36.22 | 11 | 33   | 196  | 21.7  | 6.70  |
| Q99NF3   | Centrosomal protein of 41 kDa OS=Mus musculus GN=Cep41 PE=1 SV=1 - [CEP41_MOUSE]                                              | 35.39 | 2  | 9  | 9  | 30   | 1.153 | 1.157 | 1.083 | 1.085 | 94.72   | 35.39 | 14 | 30   | 373  | 41.4  | 8.12  |
| P68134   | Actin, alpha skeletal muscle OS=Mus musculus GN=Acta1 PE=1 SV=1 - [ACTS_MOUSE]                                                | 67.37 | 3  | 2  | 27 | 2327 | 0.772 | 1.243 | 1.197 | 1.085 | 6680.19 | 67.37 | 45 | 2327 | 377  | 42.0  | 5.39  |
| Q6A009   | E3 ubiquitin-protein ligase listerin OS=Mus musculus GN=Ltn1 PE=1 SV=3 - [LTN1_MOUSE]                                         | 6.90  | 1  | 12 | 12 | 27   | 0.864 | 0.920 | 0.806 | 1.086 | 69.46   | 6.90  | 20 | 27   | 1767 | 198.8 | 6.55  |
| P47937   | Neuromedin-K receptor OS=Mus musculus GN=Tacr3 PE=2 SV=2 - [NK3R_MOUSE]                                                       | 1.99  | 1  | 1  | 1  | 1    | 1.229 | 0.877 | 0.908 | 1.086 | 1.69    | 1.99  | 1  | 1    | 452  | 51.0  | 9.31  |
| Q99KD5   | Protein unc-45 homolog A OS=Mus musculus GN=Unc45a PE=1 SV=2 - [UN45A_MOUSE]                                                  | 17.37 | 4  | 14 | 14 | 27   | 0.949 | 1.377 | 0.844 | 1.086 | 84.80   | 17.37 | 20 | 27   | 944  | 103.4 | 6.34  |
| Q3UMB5   | Smith-Magenis syndrome chromosomal region candidate gene 8 protein homolog OS=Mus musculus GN=Smcr8 PE=1 SV=2 - [SMCR8_MOUSE] | 29.84 | 2  | 20 | 20 | 53   | 1.043 | 0.954 | 0.988 | 1.086 | 160.36  | 29.84 | 32 | 53   | 935  | 104.9 | 5.40  |
| Q8BYK5-2 | Isoform 2 of Phosphatase and actin regulator 3 OS=Mus musculus GN=Phactr3 -                                                   | 19.68 | 5  | 9  | 10 | 21   | 0.975 | 1.035 | 1.401 | 1.086 | 55.05   | 19.68 | 16 | 21   | 559  | 63.1  | 9.45  |
| E9Q3C1   | Protein C2cd2 OS=Mus musculus GN=C2cd2 PE=2 SV=1 - [E9Q3C1_MOUSE]                                                             | 5.60  | 1  | 4  | 4  | 7    | 1.028 | 1.217 | 1.177 | 1.086 | 8.09    | 5.60  | 6  | 7    | 696  | 76.5  | 7.72  |
| Q9J174   | Kelch-like protein 1 OS=Mus musculus GN=Klh1 PE=1 SV=2 - [KLHL1_MOUSE]                                                        | 6.92  | 1  | 3  | 3  | 9    | 1.334 | 0.582 | 0.909 | 1.086 | 15.63   | 6.92  | 4  | 9    | 751  | 82.8  | 6.42  |
| Q8CHX7   | Raftin-2 OS=Mus musculus GN=Rftn2 PE=2 SV=3 - [RFTN2_MOUSE]                                                                   | 28.00 | 2  | 10 | 10 | 61   | 1.015 | 1.017 | 0.946 | 1.086 | 209.07  | 28.00 | 19 | 61   | 500  | 54.9  | 5.50  |
| Q8VCH8   | UBX domain-containing protein 4 OS=Mus musculus GN=Ubxn4 PE=1 SV=1 -                                                          | 27.67 | 1  | 8  | 8  | 20   | 0.813 | 0.663 | 0.963 | 1.086 | 59.36   | 27.67 | 13 | 20   | 506  | 56.4  | 6.61  |
| P62331   | ADP-ribosylation factor 6 OS=Mus musculus GN=Arf6 PE=1 SV=2 - [ARF6_MOUSE]                                                    | 45.71 | 5  | 6  | 7  | 17   | 0.861 | 1.014 | 1.000 | 1.086 | 51.48   | 45.71 | 10 | 17   | 175  | 20.1  | 8.95  |
| O35495   | Cyclin-dependent kinase 14 OS=Mus musculus GN=Cdk14 PE=2 SV=2 - [CDK14_MOUSE]                                                 | 29.00 | 20 | 8  | 11 | 67   | 1.223 | 1.213 | 1.107 | 1.086 | 204.82  | 29.00 | 19 | 67   | 469  | 53.0  | 8.92  |
| Q3UHK1   | Proton myo-inositol cotransporter OS=Mus musculus GN=Slc2a13 PE=2 SV=2 -                                                      | 13.50 | 1  | 8  | 8  | 54   | 0.797 | 1.074 | 0.900 | 1.086 | 163.18  | 13.50 | 16 | 54   | 637  | 69.0  | 6.86  |
| P56393   | Cytochrome c oxidase subunit 7B, mitochondrial OS=Mus musculus GN=Cox7b PE=2 SV=1 - [COX7B_MOUSE]                             | 10.00 | 1  | 2  | 2  | 5    | 0.975 | 0.919 | 1.088 | 1.086 | 15.44   | 10.00 | 4  | 5    | 80   | 9.0   | 10.27 |
| Q9EQG9   | Collagen type IV alpha-3-binding protein OS=Mus musculus GN=Col4a3bp PE=1 SV=1 - [C43BP_MOUSE]                                | 17.15 | 3  | 12 | 12 | 23   | 1.314 | 0.963 | 0.722 | 1.086 | 58.08   | 17.15 | 17 | 23   | 624  | 71.1  | 5.44  |
| Q9DBJ6   | Josephin-1 OS=Mus musculus GN=Josi1 PE=2 SV=1 - [JOS1_MOUSE]                                                                  | 5.45  | 1  | 1  | 1  | 2    | 1.527 | 1.455 | 1.232 | 1.086 | 7.28    | 5.45  | 2  | 2    | 202  | 23.1  | 8.53  |
| A2AV19   | Exosome complex component RRP4 (Fragment) OS=Mus musculus GN=Exosc2 PE=2 SV=1 - [RRP4_MOUSE]                                  | 23.89 | 2  | 3  | 3  | 6    | 1.360 | 1.074 | 1.086 | 1.086 | 20.29   | 23.89 | 6  | 6    | 247  | 27.3  | 8.16  |
| Q9ERA0   | Alpha-globin transcription factor CP2 OS=Mus musculus GN=Ttcp2 PE=1 SV=1 - [TFCP2_MOUSE]                                      | 14.34 | 3  | 4  | 5  | 12   | 0.600 | 1.029 | 0.911 | 1.086 | 36.73   | 14.34 | 8  | 12   | 502  | 57.0  | 5.54  |
| Q3UNT6   | B-lymphocyte antigen CD20 OS=Mus musculus GN=Msra2 PE=2 SV=1 - [Q3UNT6_MOUSE]                                                 | 9.09  | 2  | 1  | 1  | 1    | 2.366 | 0.986 | 0.863 | 1.086 | 0.00    | 9.09  | 1  | 1    | 198  | 22.2  | 4.44  |
| P31001   | Desmin OS=Mus musculus GN=Des PE=1 SV=3 - [TFPM_MOUSE]                                                                        | 41.36 | 1  | 12 | 18 | 194  | 1.264 | 2.792 | 1.073 | 1.086 | 475.64  | 41.36 | 31 | 194  | 469  | 53.5  | 5.27  |
| Q64133   | Amine oxidase [flavin-containing] A OS=Mus musculus GN=Maoa PE=1 SV=3 - [AOFA_MOUSE]                                          | 45.63 | 1  | 18 | 23 | 109  | 0.846 | 0.845 | 0.784 | 1.086 | 296.11  | 45.63 | 43 | 109  | 526  | 59.6  | 7.81  |
| Q6F5F2   | Protein Sirpb1a OS=Mus musculus GN=Sirpb1a PE=2 SV=1 - [Q6F5F2_MOUSE]                                                         | 3.84  | 4  | 1  | 3  | 26   | 0.800 | 0.881 | 1.152 | 1.086 | 53.23   | 3.84  | 5  | 26   | 391  | 43.5  | 7.99  |
| Q9Z2X8   | Kelch-like ECH-associated protein 1 OS=Mus musculus GN=Keap1 PE=1 SV=1 - [KEAP1_MOUSE]                                        | 14.90 | 1  | 9  | 9  | 18   | 1.080 | 1.004 | 0.892 | 1.086 | 39.07   | 14.90 | 14 | 18   | 624  | 69.5  | 6.44  |



|          |                                                                                                                    |       |   |    |    |     |       |       |       |       |         |       |     |     |      |       |       |
|----------|--------------------------------------------------------------------------------------------------------------------|-------|---|----|----|-----|-------|-------|-------|-------|---------|-------|-----|-----|------|-------|-------|
| Q62073   | Mitogen-activated protein kinase kinase kinase 7<br>OS=Mus musculus<br>GN=Map3k7 PE=1 SV=1 - [M3K7_MOUSE]          | 18.48 | 4 | 9  | 9  | 25  | 1.588 | 0.969 | 1.354 | 1.086 | 80.75   | 18.48 | 15  | 25  | 579  | 64.2  | 6.67  |
| P61315   | Galactose-3-O-sulfotransferase 3<br>OS=Mus musculus<br>GN=Gal3st3 PE=2 SV=1 -                                      | 5.57  | 1 | 2  | 2  | 4   | 0.848 | 1.534 | 1.121 | 1.087 | 9.59    | 5.57  | 4   | 4   | 431  | 49.2  | 9.76  |
| Q9D3X9-2 | Isoform 2 of Microfibrillar-associated protein 3-like<br>OS=Mus musculus<br>GN=Mfap3l - [MFA3L_MOUSE]              | 7.52  | 3 | 3  | 3  | 5   | 0.728 | 1.248 | 1.012 | 1.087 | 13.13   | 7.52  | 5   | 5   | 306  | 34.2  | 4.89  |
| G3UYK8   | Coronin<br>OS=Mus musculus<br>GN=Coro1a PE=2 SV=1 - [G3UYK8_MOUSE]                                                 | 33.68 | 4 | 1  | 14 | 68  | 0.452 | 1.596 | 1.470 | 1.087 | 195.76  | 33.68 | 25  | 68  | 389  | 43.2  | 6.74  |
| P59041   | DnaJ homolog subfamily C member 30<br>OS=Mus musculus<br>GN=Dnajc30 PE=2 SV=1 -                                    | 11.42 | 1 | 2  | 2  | 2   | 0.557 | 0.901 | 0.967 | 1.087 | 4.99    | 11.42 | 2   | 2   | 219  | 24.7  | 10.21 |
| Q9D6Y9   | 1,4-alpha-glucan-branching enzyme<br>OS=Mus musculus<br>GN=Gbe1 PE=2 SV=1 -                                        | 31.62 | 3 | 19 | 19 | 50  | 0.833 | 0.713 | 0.907 | 1.087 | 133.65  | 31.62 | 35  | 50  | 702  | 80.3  | 6.43  |
| Q5U4C1   | G-protein coupled receptor-associated sorting protein 1<br>OS=Mus musculus<br>GN=Gprasp1 PE=2 SV=1 - [GASP1_MOUSE] | 23.61 | 2 | 30 | 31 | 90  | 1.043 | 1.094 | 0.755 | 1.087 | 241.32  | 23.61 | 51  | 90  | 1347 | 151.6 | 5.08  |
| Q8BX37   | Iron/zinc purple acid phosphatase-like protein<br>OS=Mus musculus<br>GN=Papl PE=2 SV=2 - [PAPL_MOUSE]              | 2.51  | 2 | 1  | 1  | 2   | 0.551 | 1.245 | 1.348 | 1.087 | 2.01    | 2.51  | 1   | 2   | 438  | 50.6  | 9.04  |
| O54984   | ATPase Asna1<br>OS=Mus musculus<br>GN=Asna1 PE=1 SV=2 - [ASNA_MOUSE]                                               | 37.36 | 1 | 9  | 9  | 45  | 0.756 | 1.323 | 0.984 | 1.087 | 132.16  | 37.36 | 18  | 45  | 348  | 38.8  | 4.91  |
| Q8R146-2 | Isoform 2 of Acylaminic acid-releasing enzyme<br>OS=Mus musculus<br>GN=Apeh - [APEH_MOUSE]                         | 50.63 | 2 | 26 | 26 | 81  | 1.204 | 0.936 | 0.801 | 1.087 | 272.54  | 50.63 | 43  | 81  | 717  | 79.9  | 5.54  |
| Q62009-5 | Isoform 5 of Periostin<br>OS=Mus musculus<br>GN=Postn - [POSTN_MOUSE]                                              | 3.83  | 5 | 2  | 3  | 5   | 1.204 | 1.294 | 0.853 | 1.087 | 11.48   | 3.83  | 4   | 5   | 783  | 87.0  | 7.66  |
| Q9DBE8   | Alpha-1,3/1,6-mannosyltransferase ALG2<br>OS=Mus musculus<br>GN=Alg2 PE=2 SV=2 -                                   | 41.69 | 2 | 16 | 16 | 82  | 0.626 | 0.823 | 0.834 | 1.087 | 244.02  | 41.69 | 29  | 82  | 415  | 47.4  | 7.97  |
| Q9Z2Y1   | UBX domain-containing protein 1<br>OS=Mus musculus<br>GN=Ubxn1 PE=1 SV=1 -                                         | 40.40 | 1 | 10 | 10 | 54  | 1.686 | 0.898 | 1.114 | 1.087 | 127.48  | 40.40 | 17  | 54  | 297  | 33.6  | 5.26  |
| Q6PCX9   | E3 ubiquitin-protein ligase TRIM37<br>OS=Mus musculus<br>GN=Trim37 PE=2 SV=1 - [TRIM37_MOUSE]                      | 1.14  | 1 | 1  | 1  | 2   | 1.442 | 1.037 | 1.663 | 1.087 | 7.23    | 1.14  | 1   | 2   | 961  | 107.6 | 5.21  |
| Q8V151   | VPS10 domain-containing receptor SorCS3<br>OS=Mus musculus<br>GN=Sorcs3 PE=1 SV=1 - [SORCS3_MOUSE]                 | 6.56  | 1 | 8  | 8  | 15  | 0.920 | 1.298 | 1.296 | 1.088 | 32.62   | 6.56  | 12  | 15  | 1219 | 135.9 | 6.49  |
| P52840   | Sulfotransferase 1A1<br>OS=Mus musculus<br>GN=Sult1a1 PE=2 SV=1 - [ST1A1_MOUSE]                                    | 13.40 | 5 | 2  | 3  | 4   | 1.452 | 1.318 | 0.820 | 1.088 | 5.95    | 13.40 | 3   | 4   | 291  | 34.0  | 8.10  |
| O70310   | Glycylpeptide N-tetradecanoyltransferase 1<br>OS=Mus musculus<br>GN=Nimt1 PE=1 SV=1 - [NMT1_MOUSE]                 | 21.77 | 1 | 7  | 10 | 31  | 0.760 | 0.800 | 1.122 | 1.088 | 94.29   | 21.77 | 17  | 31  | 496  | 56.9  | 8.00  |
| D3YZ62   | Unconventional myosin-Va<br>OS=Mus musculus<br>GN=Myo5a PE=2 SV=1 - [D3YZ62_MOUSE]                                 | 50.00 | 8 | 81 | 92 | 550 | 0.679 | 0.912 | 1.092 | 1.088 | 1526.21 | 50.00 | 158 | 550 | 1828 | 212.2 | 8.62  |
| Q9D7S7-2 | Isoform 2 of 60S ribosomal protein L22-like 1<br>OS=Mus musculus<br>GN=Rpl22l1 -                                   | 25.62 | 2 | 3  | 3  | 5   | 0.694 | 0.840 | 0.811 | 1.088 | 12.25   | 25.62 | 4   | 5   | 121  | 14.3  | 9.45  |
| G3X8Y7   | Long-chain fatty acid transport protein 3<br>OS=Mus musculus<br>GN=Slc27a3 PE=4 SV=1 - [G3X8Y7_MOUSE]              | 3.90  | 3 | 2  | 2  | 3   | 0.564 | 0.731 | 0.942 | 1.088 | 12.99   | 3.90  | 3   | 3   | 667  | 73.0  | 7.65  |
| Q8C014   | Enhancer of polycomb homolog 2<br>OS=Mus musculus<br>GN=Epc2 PE=2 SV=2 - [EPC2_MOUSE]                              | 5.69  | 1 | 4  | 4  | 8   | 0.619 | 1.080 | 1.116 | 1.088 | 16.02   | 5.69  | 6   | 8   | 808  | 90.9  | 8.73  |
| Q8R2K1-2 | Isoform 2 of Fucose mutarotase<br>OS=Mus musculus<br>GN=Fuom - [FUCM_MOUSE]                                        | 24.81 | 8 | 3  | 3  | 9   | 1.139 | 1.217 | 0.852 | 1.088 | 29.18   | 24.81 | 5   | 9   | 133  | 14.7  | 5.31  |
| E9Q722   | Upstream stimulatory factor 1<br>OS=Mus musculus<br>GN=Irf1 PE=2 SV=1 - [E9Q722_MOUSE]                             | 6.42  | 2 | 1  | 1  | 7   | 0.779 | 1.511 | 0.918 | 1.088 | 18.67   | 6.42  | 2   | 7   | 296  | 32.0  | 5.50  |
| Q9D0T1   | NHP2-like protein 1<br>OS=Mus musculus<br>GN=Nhp2l1 PE=2 SV=4 - [NH2L1_MOUSE]                                      | 40.63 | 2 | 6  | 6  | 25  | 0.930 | 1.054 | 0.793 | 1.088 | 69.85   | 40.63 | 11  | 25  | 128  | 14.2  | 8.46  |
| Q9D5V5   | Cullin-5<br>OS=Mus musculus<br>GN=Cul5 PE=1 SV=3 - [CUL5_MOUSE]                                                    | 37.31 | 4 | 24 | 26 | 98  | 0.757 | 1.043 | 1.082 | 1.089 | 266.13  | 37.31 | 44  | 98  | 780  | 90.9  | 7.81  |

|          |                                                                                                                                    |       |   |    |    |     |       |       |       |       |        |       |    |     |      |       |      |
|----------|------------------------------------------------------------------------------------------------------------------------------------|-------|---|----|----|-----|-------|-------|-------|-------|--------|-------|----|-----|------|-------|------|
| E9QAD8   | IQ motif and SEC7 domain-containing protein 2<br>OS=Mus musculus<br>GN=Iqsec2 PE=2 SV=1 - [E9QAD8_MOUSE]                           | 38.24 | 5 | 36 | 42 | 186 | 1.559 | 1.611 | 1.802 | 1.089 | 580.92 | 38.24 | 72 | 186 | 1488 | 162.7 | 8.56 |
| Q8CDN6   | Thioredoxin-like protein 1<br>OS=Mus musculus<br>GN=Txnl1 PE=1 SV=3 - [TXNL1_MOUSE]                                                | 48.10 | 1 | 9  | 9  | 82  | 1.346 | 1.140 | 0.966 | 1.089 | 228.02 | 48.10 | 17 | 82  | 289  | 32.2  | 4.96 |
| Q91Y22   | C-terminal binding protein 2, isoform CRA_b OS=Mus musculus<br>GN=Ctbp2 PE=2 SV=1 - [Q91Y22_MOUSE]                                 | 30.24 | 5 | 6  | 9  | 37  | 0.700 | 1.054 | 0.731 | 1.089 | 102.85 | 30.24 | 16 | 37  | 420  | 45.9  | 6.48 |
| D3Z657   | Immunoglobulin superfamily member 11<br>OS=Mus musculus<br>GN=Igf11 PE=4 SV=1 - [D3Z657_MOUSE]                                     | 16.80 | 2 | 4  | 4  | 38  | 0.905 | 1.142 | 1.327 | 1.089 | 88.62  | 16.80 | 7  | 38  | 369  | 39.9  | 7.17 |
| E9Q6P9   | Voltage-dependent T-type calcium channel subunit alpha-1H OS=Mus musculus<br>GN=Cacna1h PE=4 SV=1 - [E9Q6P9_MOUSE]                 | 3.22  | 7 | 5  | 7  | 11  | 1.254 | 1.277 | 1.262 | 1.089 | 23.49  | 3.22  | 11 | 11  | 2359 | 261.1 | 6.92 |
| Q8K0G5   | Protein TSSC1 OS=Mus musculus<br>GN=Tssc1 PE=1 SV=2 - [TSSC1_MOUSE]                                                                | 24.61 | 1 | 7  | 7  | 35  | 1.008 | 1.342 | 1.085 | 1.089 | 119.70 | 24.61 | 12 | 35  | 386  | 43.1  | 5.14 |
| Q920E5   | Farnesyl pyrophosphate synthase OS=Mus musculus<br>GN=Fdps PE=2 SV=1 - [FPPS_MOUSE]                                                | 33.71 | 1 | 11 | 11 | 38  | 0.906 | 0.914 | 0.849 | 1.089 | 123.43 | 33.71 | 19 | 38  | 353  | 40.6  | 5.66 |
| Q8K0D5   | Elongation factor G, mitochondrial OS=Mus musculus<br>GN=Gfm1 PE=2 SV=1 - [EFGM_MOUSE]                                             | 31.29 | 2 | 23 | 23 | 81  | 0.797 | 0.801 | 1.006 | 1.089 | 219.65 | 31.29 | 43 | 81  | 751  | 83.5  | 6.92 |
| Q8BQP9   | Regulator of G-protein signaling 7-binding protein OS=Mus musculus<br>GN=Rgs7bp PE=1 SV=1 - [R7BP_MOUSE]                           | 38.52 | 1 | 6  | 6  | 29  | 0.653 | 1.191 | 1.414 | 1.089 | 84.13  | 38.52 | 10 | 29  | 257  | 29.0  | 8.46 |
| P62962   | Profilin-1 OS=Mus musculus<br>GN=Pfn1 PE=1 SV=2 - [PROF1_MOUSE]                                                                    | 73.57 | 3 | 10 | 10 | 175 | 0.907 | 0.940 | 0.980 | 1.089 | 547.76 | 73.57 | 20 | 175 | 140  | 14.9  | 8.28 |
| Q6GQW0   | Ankyrin repeat and BTB/POZ domain-containing protein BTBD11 OS=Mus musculus<br>GN=Btb11 PE=2 SV=2 - [BTBD11_MOUSE]                 | 12.17 | 6 | 10 | 10 | 26  | 0.687 | 0.850 | 0.753 | 1.089 | 60.89  | 12.17 | 19 | 26  | 1109 | 121.5 | 6.81 |
| A2AQ17   | Complex I intermediate-associated protein 30, mitochondrial OS=Mus musculus<br>GN=Ndufaf1 PE=4 SV=1 - [A2AQ17_MOUSE]               | 33.23 | 2 | 10 | 10 | 28  | 1.110 | 1.095 | 1.053 | 1.089 | 88.87  | 33.23 | 17 | 28  | 328  | 37.8  | 8.60 |
| Q9Z2B2-2 | Formin-1 isoform 2<br>Isoform 2 of Brain mitochondrial carrier protein 1 OS=Mus musculus<br>GN=Slc25a14 PE=1 SV=1 - [Q9Z2B2_MOUSE] | 11.49 | 2 | 2  | 4  | 11  | 1.082 | 1.152 | 1.017 | 1.089 | 11.76  | 11.49 | 7  | 11  | 322  | 36.0  | 9.69 |
| Q9JK81   | UPF0160 protein MYG1, mitochondrial OS=Mus musculus<br>GN=Myg1 PE=2 SV=1 - [MYG1_MOUSE]                                            | 41.84 | 3 | 13 | 13 | 48  | 0.634 | 0.970 | 0.873 | 1.089 | 134.52 | 41.84 | 22 | 48  | 380  | 42.7  | 7.02 |
| Q9D854   | Oligoribonuclease, mitochondrial OS=Mus musculus<br>GN=Rexx2 PE=1 SV=2 - [ORN_MOUSE]                                               | 39.66 | 1 | 8  | 9  | 25  | 1.312 | 0.972 | 1.161 | 1.089 | 76.52  | 39.66 | 17 | 25  | 237  | 26.7  | 7.15 |
| O54824   | Pro-interleukin-16 OS=Mus musculus<br>GN=Il16 PE=1 SV=3 - [IL16_MOUSE]                                                             | 7.87  | 2 | 6  | 7  | 8   | 1.489 | 0.861 | 1.213 | 1.090 | 18.87  | 7.87  | 8  | 8   | 1322 | 141.3 | 7.78 |
| O70439   | Syntaxin-7 OS=Mus musculus<br>GN=Stx7 PE=1 SV=3 - [STX7_MOUSE]                                                                     | 54.41 | 1 | 10 | 11 | 67  | 1.008 | 1.195 | 1.080 | 1.090 | 204.87 | 54.41 | 19 | 67  | 261  | 29.8  | 5.78 |
| Q8BJ1    | Sodium-dependent neutral amino acid transporter SLC6A17 OS=Mus musculus<br>GN=Slc6a17 PE=1 SV=1 - [S6A17_MOUSE]                    | 18.84 | 2 | 11 | 11 | 78  | 0.681 | 1.237 | 1.130 | 1.090 | 190.12 | 18.84 | 19 | 78  | 727  | 81.0  | 6.23 |
| E9Q3K3   | Arf-GAP with GTPase, ANK repeat and PH domain-containing protein 1 OS=Mus musculus<br>GN=Agap1 PE=2 SV=1 - [E9Q3K3_MOUSE]          | 21.77 | 3 | 10 | 16 | 62  | 0.624 | 0.710 | 0.886 | 1.090 | 197.11 | 21.77 | 27 | 62  | 804  | 89.0  | 8.03 |
| Q8CEC0-3 | Isoform 3 of Nuclear pore complex protein Nup88 OS=Mus musculus<br>GN=Nup88                                                        | 14.56 | 3 | 9  | 10 | 15  | 1.324 | 1.149 | 1.085 | 1.090 | 41.17  | 14.56 | 13 | 15  | 742  | 83.6  | 6.10 |
| Q8CHK3   | Lysophospholipid acyltransferase 7 OS=Mus musculus<br>GN=Mboat7 PE=2 SV=1 - [MFF_MOUSE]                                            | 9.73  | 2 | 4  | 4  | 28  | 0.356 | 1.054 | 0.920 | 1.090 | 86.45  | 9.73  | 6  | 28  | 473  | 53.4  | 8.69 |
| Q6PCP5   | Mitochondrial fission factor OS=Mus musculus<br>GN=Mff PE=1 SV=1 - [MFF_MOUSE]                                                     | 45.36 | 7 | 3  | 10 | 83  | 1.176 | 0.972 | 1.090 | 1.090 | 269.07 | 45.36 | 17 | 83  | 291  | 32.9  | 6.83 |
| Q3V2Q8   | NEDD4-binding protein 2-like 1 OS=Mus musculus<br>GN=N4bp2l1 PE=2 SV=1 - [N42L1_MOUSE]                                             | 7.56  | 2 | 1  | 2  | 14  | 1.781 | 1.456 | 1.048 | 1.090 | 25.04  | 7.56  | 4  | 14  | 238  | 28.0  | 9.94 |
| Q06185   | ATP synthase subunit e, mitochondrial OS=Mus musculus<br>GN=Atp5i PE=1 SV=2 - [ATP5I_MOUSE]                                        | 53.52 | 2 | 3  | 4  | 16  | 0.713 | 1.644 | 1.115 | 1.090 | 34.63  | 53.52 | 7  | 16  | 71   | 8.2   | 9.35 |

|        |                                                                                                                    |       |   |    |    |     |       |       |       |       |        |       |    |     |      |       |      |
|--------|--------------------------------------------------------------------------------------------------------------------|-------|---|----|----|-----|-------|-------|-------|-------|--------|-------|----|-----|------|-------|------|
| Q8BFR5 | Elongation factor Tu, mitochondrial OS=Mus musculus GN=Tufm PE=1 SV=1 - [EFTU_MOUSE]                               | 69.25 | 3 | 27 | 27 | 282 | 0.969 | 1.045 | 1.086 | 1.090 | 891.65 | 69.25 | 52 | 282 | 452  | 49.5  | 7.56 |
| B1AZA5 | Transmembrane protein 245 OS=Mus musculus GN=Tmem245 PE=1 SV=1 - [TM245_MOUSE]                                     | 7.76  | 3 | 6  | 6  | 18  | 0.850 | 1.415 | 1.104 | 1.090 | 41.16  | 7.76  | 12 | 18  | 876  | 97.3  | 8.75 |
| Q8VCG3 | WD repeat-containing protein 74 OS=Mus musculus GN=Wdr74 PE=2 SV=1 -                                               | 3.13  | 1 | 1  | 1  | 3   | 0.872 | 0.890 | 1.092 | 1.090 | 6.14   | 3.13  | 2  | 3   | 384  | 42.6  | 7.78 |
| Q8C6I5 | Cysteine desulfurase, mitochondrial OS=Mus musculus GN=Nfs1 PE=2 SV=1 - [Q8C6I5_MOUSE]                             | 53.38 | 6 | 19 | 19 | 72  | 1.062 | 0.899 | 0.978 | 1.090 | 248.52 | 53.38 | 37 | 72  | 459  | 50.5  | 8.16 |
| A2A6J4 | Lymphocyte-specific protein 1 OS=Mus musculus GN=Lsp1 PE=2 SV=1 - [A2A6J4_MOUSE]                                   | 13.98 | 4 | 4  | 4  | 5   | 3.207 | 1.490 | 1.519 | 1.090 | 16.13  | 13.98 | 5  | 5   | 322  | 35.7  | 5.12 |
| Q91YX0 | Protein THEMIS2 OS=Mus musculus GN=Themis2 PE=1 SV=2 - [THMS2_MOUSE]                                               | 1.51  | 1 | 1  | 1  | 1   | 0.873 | 0.774 | 0.931 | 1.090 | 2.64   | 1.51  | 1  | 1   | 663  | 74.3  | 6.19 |
| P973B4 | Annexin A11 OS=Mus musculus GN=Anxa11 PE=1 SV=2 - [ANX11_MOUSE]                                                    | 26.24 | 2 | 11 | 12 | 34  | 0.962 | 2.226 | 1.169 | 1.091 | 108.43 | 26.24 | 21 | 34  | 503  | 54.0  | 7.66 |
| Q91YS7 | Dual-specificity mitogen-activated protein kinase kinase 2 OS=Mus musculus GN=Map2k2 PE=2 SV=1 - [MAP2K2_MOUSE]    | 41.00 | 4 | 10 | 17 | 75  | 0.567 | 1.075 | 0.904 | 1.091 | 194.46 | 41.00 | 29 | 75  | 400  | 44.3  | 7.05 |
| Q9D6J6 | NADH dehydrogenase [ubiquinone] flavoprotein 2, mitochondrial OS=Mus musculus GN=Ndufv2 PE=1 SV=2 - [NDUFV2_MOUSE] | 55.24 | 4 | 13 | 14 | 312 | 1.851 | 0.914 | 1.254 | 1.091 | 960.98 | 55.24 | 23 | 312 | 248  | 27.3  | 7.40 |
| O547Z4 | Polymerase I and transcript release factor OS=Mus musculus GN=Ptf1 PE=1 SV=1 - [PTF1_MOUSE]                        | 26.79 | 1 | 9  | 12 | 33  | 1.016 | 1.980 | 1.142 | 1.091 | 98.31  | 26.79 | 19 | 33  | 392  | 43.9  | 5.52 |
| Q80TB8 | Synaptic vesicle membrane protein VAT-1 homolog-like OS=Mus musculus GN=Vat1l PE=2 SV=2 - [VAT1L_MOUSE]            | 43.88 | 1 | 12 | 16 | 93  | 0.905 | 0.841 | 0.755 | 1.091 | 264.90 | 43.88 | 28 | 93  | 417  | 45.8  | 5.06 |
| Q8K2Z1 | Arfaptin-2 OS=Mus musculus GN=Arfp2 PE=2 SV=2 - [ARFP2_MOUSE]                                                      | 45.16 | 3 | 14 | 14 | 51  | 0.831 | 1.653 | 0.982 | 1.091 | 150.71 | 45.16 | 22 | 51  | 341  | 37.7  | 5.87 |
| Q8C0K8 | Protein Uvrug OS=Mus musculus GN=Uvrug PE=2 SV=1 - [Q8C0K8_MOUSE]                                                  | 17.19 | 1 | 10 | 11 | 18  | 0.676 | 0.951 | 1.119 | 1.091 | 49.92  | 17.19 | 17 | 18  | 698  | 77.5  | 7.97 |
| O351I4 | Lysosome membrane protein 2 OS=Mus musculus GN=Scarb2 PE=1 SV=3 -                                                  | 16.53 | 1 | 9  | 9  | 31  | 0.868 | 1.027 | 0.789 | 1.091 | 79.34  | 16.53 | 16 | 31  | 478  | 54.0  | 5.10 |
| Q91W34 | UPF0420 protein C16orf58 homolog OS=Mus musculus PE=2 SV=1 - [CP058_MOUSE]                                         | 16.31 | 3 | 7  | 7  | 22  | 0.591 | 0.846 | 0.775 | 1.091 | 58.57  | 16.31 | 12 | 22  | 466  | 50.4  | 7.15 |
| Q80Y39 | Uncharacterized protein C10orf62 homolog OS=Mus musculus PE=2 SV=1 - [C1062_MOUSE]                                 | 8.22  | 1 | 1  | 2  | 2   | 2.228 | 1.519 | 1.896 | 1.091 | 5.00   | 8.22  | 2  | 2   | 304  | 34.0  | 9.51 |
| Q80TL4 | Protein KIAA1045 OS=Mus musculus GN=Kiaa1045 PE=1 SV=2 - [K1045_MOUSE]                                             | 35.25 | 3 | 15 | 15 | 61  | 0.750 | 1.402 | 1.526 | 1.091 | 160.17 | 35.25 | 28 | 61  | 400  | 45.2  | 5.77 |
| A2AD03 | Rab proteins geranylgeranyltransferase component A 1 OS=Mus musculus GN=Chm PE=2 SV=1 - [A2AD03_MOUSE]             | 9.67  | 3 | 5  | 5  | 12  | 0.516 | 1.160 | 1.195 | 1.091 | 39.09  | 9.67  | 8  | 12  | 662  | 73.6  | 4.69 |
| F6UDR6 | E3 ubiquitin-protein ligase RNF170 (Fragment) OS=Mus musculus GN=Rnf170 PE=4 SV=1 - [F6UDR6_MOUSE]                 | 12.39 | 8 | 1  | 1  | 5   | 0.804 | 1.062 | 1.135 | 1.091 | 19.36  | 12.39 | 2  | 5   | 113  | 12.9  | 4.70 |
| Q7TPM9 | Myotubularin-related protein 10 OS=Mus musculus GN=Mtmr10 PE=2 SV=2 -                                              | 2.46  | 1 | 2  | 2  | 3   | 1.101 | 1.015 | 0.870 | 1.091 | 10.43  | 2.46  | 3  | 3   | 771  | 88.1  | 8.68 |
| Q9CQM0 | Nicotin-1 OS=Mus musculus GN=Nicn1 PE=1 SV=1 - [NICN1_MOUSE]                                                       | 9.39  | 1 | 2  | 2  | 5   | 0.872 | 0.874 | 0.935 | 1.091 | 12.30  | 9.39  | 4  | 5   | 213  | 24.3  | 7.08 |
| Q8BP40 | Lysophosphatidic acid phosphatase type 6 OS=Mus musculus GN=Acp6 PE=2 SV=1 -                                       | 37.32 | 1 | 11 | 11 | 38  | 1.913 | 1.336 | 1.059 | 1.091 | 113.45 | 37.32 | 18 | 38  | 418  | 47.6  | 7.72 |
| Q8K0S5 | Reticulon-4 receptor-like 1 OS=Mus musculus GN=Rtn4rl1 PE=2 SV=1 - [R4RL1_MOUSE]                                   | 8.09  | 1 | 3  | 3  | 5   | 0.837 | 1.252 | 1.090 | 1.091 | 14.67  | 8.09  | 5  | 5   | 445  | 49.8  | 8.65 |
| B1AR09 | Protein Millt6 OS=Mus musculus GN=Millt6 PE=2 SV=1 - [B1AR09_MOUSE]                                                | 9.27  | 2 | 6  | 6  | 8   | 1.919 | 1.047 | 1.529 | 1.092 | 27.14  | 9.27  | 6  | 8   | 1079 | 110.5 | 8.47 |
| E9QPH0 | cGMP-dependent protein kinase OS=Mus musculus GN=Prkg2 PE=2 SV=1 - [E9QPH0_MOUSE]                                  | 18.42 | 3 | 10 | 13 | 25  | 1.020 | 1.874 | 1.258 | 1.092 | 57.71  | 18.42 | 18 | 25  | 733  | 84.2  | 8.40 |
| Q8K2T4 | UPF0723 protein C11orf83 homolog OS=Mus musculus PE=2 SV=1 - [CK083_MOUSE]                                         | 11.24 | 1 | 1  | 1  | 3   | 1.374 | 1.250 | 1.277 | 1.092 | 5.72   | 11.24 | 2  | 3   | 89   | 9.6   | 9.52 |

|          |                                                                                                                       |       |    |    |    |     |       |       |       |       |         |       |     |     |      |       |       |
|----------|-----------------------------------------------------------------------------------------------------------------------|-------|----|----|----|-----|-------|-------|-------|-------|---------|-------|-----|-----|------|-------|-------|
| Q80VP0-2 | Isoform 2 of Tectonin beta-propeller repeat-containing protein 1 OS=Mus musculus GN=Tecpr1 - [TCPRI_MOUSE]            | 20.49 | 3  | 18 | 19 | 63  | 0.709 | 1.031 | 1.118 | 1.092 | 202.40  | 20.49 | 32  | 63  | 1025 | 114.0 | 6.96  |
| P58854   | Gamma-tubulin complex component 3 OS=Mus musculus GN=Tubgcp3 PE=2 SV=2 - [GCP3_MOUSE]                                 | 15.58 | 3  | 13 | 13 | 33  | 0.706 | 1.018 | 0.890 | 1.092 | 93.63   | 15.58 | 23  | 33  | 905  | 103.4 | 8.32  |
| E9Q242   | Adenylosuccinate lyase OS=Mus musculus GN=Adsl PE=2 SV=1 - [E9Q242_MOUSE]                                             | 35.39 | 5  | 13 | 13 | 54  | 0.633 | 0.886 | 0.879 | 1.092 | 161.02  | 35.39 | 20  | 54  | 469  | 53.1  | 7.27  |
| O08545   | Ephrin-A3 OS=Mus musculus GN=Efn3 PE=1 SV=4 - [EFNA3_MOUSE]                                                           | 6.96  | 1  | 1  | 1  | 3   | 1.934 | 1.053 | 0.978 | 1.092 | 7.84    | 6.96  | 1   | 3   | 230  | 25.6  | 8.44  |
| Q8K4T5   | Dual specificity protein phosphatase 19 OS=Mus musculus GN=Duspp19 PE=2 SV=1 - [DUSPP19_MOUSE]                        | 5.91  | 2  | 2  | 2  | 4   | 0.787 | 0.865 | 1.009 | 1.092 | 5.87    | 5.91  | 2   | 4   | 220  | 24.2  | 5.99  |
| Q8J2P2   | Synapsin-3 OS=Mus musculus GN=Syn3 PE=1 SV=2 - [SYN3_MOUSE]                                                           | 48.70 | 2  | 19 | 21 | 136 | 1.157 | 1.021 | 1.183 | 1.092 | 369.52  | 48.70 | 35  | 136 | 579  | 63.3  | 9.38  |
| E9Q411   | Protein Nbas OS=Mus musculus GN=Nbas PE=2 SV=1 - [E9Q411_MOUSE]                                                       | 14.90 | 1  | 29 | 30 | 68  | 1.029 | 0.885 | 0.879 | 1.092 | 184.31  | 14.90 | 52  | 68  | 2356 | 265.6 | 5.95  |
| Q9Z2D3   | Non-syndromic hearing impairment protein 5 homolog OS=Mus musculus GN=Dfna5 PE=2 SV=1 - [DFNA5_MOUSE]                 | 22.66 | 4  | 10 | 10 | 24  | 0.869 | 1.052 | 0.989 | 1.092 | 68.35   | 22.66 | 17  | 24  | 512  | 56.6  | 5.39  |
| Q8C3Q5-2 | Isoform 2 of Protein shisa-7 OS=Mus musculus GN=Shisa7 - [SHSA7_MOUSE]                                                | 29.39 | 3  | 11 | 11 | 60  | 0.853 | 3.109 | 2.820 | 1.092 | 183.31  | 29.39 | 21  | 60  | 541  | 56.4  | 9.86  |
| P35285   | Ras-related protein Rab-22A OS=Mus musculus GN=Rab22a PE=1 SV=2 - [RB22A_MOUSE]                                       | 48.45 | 3  | 6  | 8  | 28  | 1.163 | 1.054 | 1.049 | 1.092 | 94.90   | 48.45 | 13  | 28  | 194  | 21.8  | 8.15  |
| E9PUW6   | Cardiolipin synthase OS=Mus musculus GN=Crls1 PE=2 SV=1 - [E9PUW6_MOUSE]                                              | 12.99 | 3  | 1  | 1  | 2   | 0.735 | 0.943 | 0.951 | 1.092 | 7.58    | 12.99 | 2   | 2   | 154  | 15.9  | 10.98 |
| Q8R2Z5   | von Willebrand factor A domain-containing protein 1 OS=Mus musculus GN=Vwa1 PE=1 SV=1 - [VWA1_MOUSE]                  | 16.87 | 1  | 4  | 4  | 14  | 1.114 | 1.079 | 0.979 | 1.092 | 63.14   | 16.87 | 7   | 14  | 415  | 44.7  | 6.54  |
| Q9Z0V7   | Mitochondrial import inner membrane translocase subunit Tim17-B OS=Mus musculus GN=Timm17b PE=2 SV=1 - [TIM17B_MOUSE] | 30.23 | 2  | 3  | 3  | 7   | 0.840 | 0.854 | 0.884 | 1.092 | 26.60   | 30.23 | 5   | 7   | 172  | 18.3  | 9.03  |
| Q9D7B6   | Isobutyryl-CoA dehydrogenase, mitochondrial OS=Mus musculus GN=Acad8 PE=2 SV=2 - [ACAD8_MOUSE]                        | 52.06 | 2  | 21 | 21 | 57  | 0.973 | 1.130 | 0.989 | 1.092 | 163.11  | 52.06 | 33  | 57  | 413  | 45.0  | 8.13  |
| B7FAU9   | Filamin, alpha OS=Mus musculus GN=Flna PE=4 SV=1 - [B7FAU9_MOUSE]                                                     | 47.82 | 8  | 91 | 97 | 370 | 0.835 | 3.002 | 0.895 | 1.092 | 1182.14 | 47.82 | 170 | 370 | 2639 | 280.3 | 6.01  |
| H7BX09   | Nuclear receptor coactivator 2 OS=Mus musculus GN=Grip1 PE=2 SV=1 - [H7BX09_MOUSE]                                    | 16.68 | 13 | 15 | 17 | 44  | 1.344 | 1.222 | 1.117 | 1.093 | 127.24  | 16.68 | 27  | 44  | 1061 | 114.3 | 5.78  |
| D3Z7V3   | Sarcolemmal membrane-associated protein OS=Mus musculus GN=Slmap PE=2 SV=1 - [D3Z7V3_MOUSE]                           | 43.04 | 13 | 31 | 32 | 105 | 0.964 | 1.317 | 1.311 | 1.093 | 270.68  | 43.04 | 57  | 105 | 790  | 90.7  | 5.25  |
| Q3UFY8   | Mitochondrial ribonuclease P protein 1 OS=Mus musculus GN=Trtm10c PE=2 SV=2 - [MRRP1_MOUSE]                           | 9.18  | 1  | 3  | 3  | 7   | 0.875 | 0.838 | 1.123 | 1.093 | 16.44   | 9.18  | 5   | 7   | 414  | 48.4  | 9.38  |
| G3X9K4   | SAPS domain family, member 2, isoform CRA_a OS=Mus musculus GN=Ppp6r2 PE=4 SV=1 - [G3X9K4_MOUSE]                      | 34.24 | 2  | 23 | 24 | 85  | 0.987 | 1.135 | 1.207 | 1.093 | 304.53  | 34.24 | 40  | 85  | 923  | 100.4 | 4.82  |
| P46096   | Synaptotagmin-1 OS=Mus musculus GN=Sytl PE=1 SV=1 - [SYT1_MOUSE]                                                      | 54.39 | 2  | 16 | 26 | 427 | 0.551 | 1.167 | 1.334 | 1.093 | 1178.65 | 54.39 | 45  | 427 | 421  | 47.4  | 8.53  |
| Q91VU6   | DBP1- and CUL4-associated factor 11 OS=Mus musculus GN=Dcaf11 PE=1 SV=1 - [DCAF11_MOUSE]                              | 18.03 | 10 | 7  | 7  | 24  | 0.882 | 0.952 | 1.184 | 1.093 | 74.84   | 18.03 | 13  | 24  | 549  | 62.0  | 6.44  |
| Q8R0V5   | Indoleamine 2,3-dioxygenase 2 OS=Mus musculus GN=Ido2 PE=1 SV=2 - [I23O2_MOUSE]                                       | 3.77  | 2  | 1  | 1  | 2   | 2.731 | 1.585 | 0.863 | 1.093 | 0.00    | 3.77  | 1   | 2   | 398  | 44.4  | 6.80  |
| P70296   | Phosphatidylethanolamine-binding protein 1 OS=Mus musculus GN=Pebp1 PE=1 SV=3 - [PEBP1_MOUSE]                         | 63.64 | 6  | 9  | 9  | 492 | 1.646 | 1.299 | 1.310 | 1.093 | 1925.55 | 63.64 | 17  | 492 | 187  | 20.8  | 5.40  |
| Q5MJS3   | Extracellular serine/threonine protein kinase FAM20C OS=Mus musculus GN=Fam20c PE=2 SV=1 - [FAM20C_MOUSE]             | 7.25  | 2  | 3  | 3  | 8   | 1.517 | 0.965 | 1.035 | 1.093 | 23.34   | 7.25  | 5   | 8   | 579  | 65.7  | 7.47  |

|        |                                                                                                                  |       |    |    |    |     |       |       |       |       |         |       |     |     |      |       |       |
|--------|------------------------------------------------------------------------------------------------------------------|-------|----|----|----|-----|-------|-------|-------|-------|---------|-------|-----|-----|------|-------|-------|
| A2AE98 | WD and tetrapeptide repeats protein 1 OS=Mus musculus GN=Wdtr1 PE=2 SV=1 - [A2AE98_MOUSE]                        | 3.25  | 2  | 2  | 2  | 3   | 1.131 | 0.896 | 0.996 | 1.093 | 3.40    | 3.25  | 3   | 3   | 615  | 69.0  | 8.40  |
| Q8VBX6 | Multiple PDZ domain protein OS=Mus musculus GN=Mpdz PE=1 SV=2 - [MPDZ_MOUSE]                                     | 14.89 | 12 | 22 | 24 | 63  | 1.130 | 1.148 | 0.856 | 1.093 | 187.75  | 14.89 | 38  | 63  | 2055 | 218.6 | 5.02  |
| E9Q6R7 | Protein Ultr OS=Mus musculus GN=Ultr PE=2 SV=1 - [E9Q6R7_MOUSE]                                                  | 21.20 | 3  | 58 | 63 | 152 | 0.942 | 1.571 | 1.011 | 1.093 | 446.57  | 21.20 | 101 | 152 | 3430 | 392.5 | 5.33  |
| Q68FH0 | Plakophilin-4 OS=Mus musculus GN=Pkp4 PE=1 SV=1 - [PKP4_MOUSE]                                                   | 58.07 | 6  | 49 | 54 | 242 | 1.123 | 1.242 | 1.153 | 1.093 | 662.51  | 58.07 | 93  | 242 | 1190 | 131.5 | 8.94  |
| Q3TC93 | HCLS1-binding protein 3 OS=Mus musculus GN=Hs1bp3 PE=1 SV=2 - [H1BP3_MOUSE]                                      | 12.15 | 1  | 4  | 4  | 9   | 1.491 | 1.033 | 1.087 | 1.093 | 18.08   | 12.15 | 8   | 9   | 395  | 43.7  | 4.98  |
| Q05A66 | Dystrophin-related protein 2 OS=Mus musculus GN=Drp2 PE=1 SV=1 - [DRP2_MOUSE]                                    | 7.52  | 2  | 7  | 9  | 17  | 1.389 | 1.121 | 1.164 | 1.093 | 30.62   | 7.52  | 12  | 17  | 957  | 108.0 | 6.25  |
| Q80UP8 | Sodium-dependent phosphate transporter 2 OS=Mus musculus GN=Slc20a2 PE=1 SV=2 - [S20A2_MOUSE]                    | 9.60  | 1  | 6  | 8  | 20  | 0.970 | 1.154 | 0.930 | 1.093 | 42.30   | 9.60  | 13  | 20  | 656  | 70.8  | 6.48  |
| K4D177 | WD repeat-containing protein 81 (Fragment) OS=Mus musculus GN=Wdr81 PE=4 SV=1 - [K4D177_MOUSE]                   | 11.58 | 5  | 16 | 16 | 36  | 0.709 | 0.875 | 0.968 | 1.093 | 75.47   | 11.58 | 28  | 36  | 1934 | 211.8 | 5.77  |
| O54829 | Regulator of G-protein signaling 7 OS=Mus musculus GN=Rgs7 PE=1 SV=2 - [RGS7_MOUSE]                              | 28.57 | 1  | 11 | 14 | 71  | 0.782 | 1.399 | 1.256 | 1.094 | 191.58  | 28.57 | 24  | 71  | 469  | 54.8  | 8.13  |
| F8WH29 | Fibrocystin-L OS=Mus musculus GN=Pkd11l1 PE=2 SV=1 - [F8WH29_MOUSE]                                              | 1.37  | 4  | 5  | 5  | 5   | 1.935 | 0.542 | 1.502 | 1.094 | 4.14    | 1.37  | 5   | 5   | 4247 | 464.2 | 6.42  |
| P63024 | Vesicle-associated membrane protein 3 OS=Mus musculus GN=Vamp3 PE=1 SV=1 - [VAMP3_MOUSE]                         | 48.54 | 1  | 2  | 5  | 179 | 1.519 | 0.636 | 0.882 | 1.094 | 522.22  | 48.54 | 9   | 179 | 103  | 11.5  | 8.50  |
| Q9WV54 | MAPK/MAK/MRK overlapping kinase OS=Mus musculus GN=Mok PE=1 SV=1 - [MOK_MOUSE]                                   | 3.10  | 3  | 1  | 2  | 13  | 1.050 | 0.965 | 1.079 | 1.094 | 37.98   | 3.10  | 2   | 13  | 420  | 48.0  | 9.48  |
| Q8B1J6 | Isoleucine-tRNA ligase, mitochondrial OS=Mus musculus GN=lars2 PE=2 SV=1 - [SYIM_MOUSE]                          | 40.12 | 3  | 31 | 31 | 137 | 0.852 | 1.074 | 0.996 | 1.094 | 433.38  | 40.12 | 52  | 137 | 1012 | 112.7 | 6.81  |
| P47857 | 6-phosphofructokinase, muscle type OS=Mus musculus GN=Pfkfb1 PE=1 SV=3 - [K6PF_MOUSE]                            | 51.92 | 1  | 31 | 36 | 551 | 1.709 | 0.979 | 0.986 | 1.094 | 1900.35 | 51.92 | 66  | 551 | 780  | 85.2  | 8.00  |
| Q91WG4 | Elongator complex protein 2 OS=Mus musculus GN=Elp2 PE=1 SV=1 - [ELP2_MOUSE]                                     | 15.64 | 2  | 12 | 12 | 22  | 1.270 | 1.100 | 0.835 | 1.094 | 63.48   | 15.64 | 17  | 22  | 831  | 93.0  | 5.82  |
| Q9JLK3 | Calcium-binding protein 5 OS=Mus musculus GN=Calp5 PE=1 SV=1 - [CABP5_MOUSE]                                     | 8.67  | 2  | 1  | 1  | 1   | 1.250 | 1.332 | 1.448 | 1.094 | 2.82    | 8.67  | 1   | 1   | 173  | 19.7  | 4.45  |
| Q5HZ12 | C2 calcium-dependent domain-containing protein 4C OS=Mus musculus GN=C2orf4c2cd4 PE=2 SV=1 - [C2ORF4C2CD4_MOUSE] | 40.10 | 1  | 10 | 11 | 37  | 1.066 | 1.448 | 1.060 | 1.094 | 121.14  | 40.10 | 17  | 37  | 419  | 44.6  | 9.73  |
| Q8K394 | Inactive phospholipase C-like protein 2 OS=Mus musculus GN=Plcl2 PE=1 SV=2 - [PLCL2_MOUSE]                       | 23.05 | 1  | 21 | 22 | 78  | 0.525 | 0.880 | 1.330 | 1.094 | 220.81  | 23.05 | 39  | 78  | 1128 | 125.7 | 6.92  |
| O35343 | Importin subunit alpha-3 OS=Mus musculus GN=Kpna4 PE=2 SV=1 - [JMA3_MOUSE]                                       | 18.62 | 2  | 4  | 8  | 30  | 1.280 | 1.369 | 1.080 | 1.094 | 93.72   | 18.62 | 14  | 30  | 521  | 57.9  | 4.94  |
| D3YW55 | Glutamate decarboxylase-like protein 1 OS=Mus musculus GN=Gad1l1 PE=2 SV=1 - [D3YW55_MOUSE]                      | 3.35  | 4  | 1  | 2  | 4   | 1.050 | 1.007 | 1.054 | 1.094 | 11.78   | 3.35  | 3   | 4   | 478  | 54.4  | 7.39  |
| Q99N32 | Beta-klotho OS=Mus musculus GN=Klb PE=1 SV=1 - [KLOTB_MOUSE]                                                     | 2.01  | 2  | 2  | 2  | 2   | 0.521 | 0.659 | 1.251 | 1.094 | 4.18    | 2.01  | 2   | 2   | 1043 | 120.1 | 9.04  |
| P42859 | Huntingtin OS=Mus musculus GN=Htt PE=1 SV=2 - [HTT_MOUSE]                                                        | 24.43 | 3  | 58 | 58 | 173 | 0.649 | 0.989 | 1.056 | 1.095 | 486.65  | 24.43 | 95  | 173 | 3119 | 344.5 | 6.29  |
| Q9ES74 | Serine/threonine-protein kinase Nek7 OS=Mus musculus GN=Nek7 PE=2 SV=1 - [NEK7_MOUSE]                            | 35.10 | 1  | 8  | 9  | 25  | 0.792 | 1.113 | 1.024 | 1.095 | 82.73   | 35.10 | 17  | 25  | 302  | 34.5  | 8.25  |
| Q9D6W8 | Uncharacterized protein C17orf59 homolog OS=Mus musculus PE=1 SV=1 - [CQ059_MOUSE]                               | 26.94 | 1  | 6  | 6  | 24  | 1.962 | 1.182 | 1.361 | 1.095 | 74.62   | 26.94 | 11  | 24  | 360  | 38.0  | 5.34  |
| D3Z7G3 | Protein 2010107G23Rik (Fragment) OS=Mus musculus GN=2010107G23Rik PE=2 SV=1 - [D3Z7G3_MOUSE]                     | 24.24 | 5  | 2  | 2  | 19  | 0.567 | 1.399 | 0.980 | 1.095 | 64.32   | 24.24 | 4   | 19  | 99   | 10.8  | 11.15 |

|          |                                                                                                                        |       |   |    |    |     |       |       |       |       |        |       |    |     |      |       |      |
|----------|------------------------------------------------------------------------------------------------------------------------|-------|---|----|----|-----|-------|-------|-------|-------|--------|-------|----|-----|------|-------|------|
| Q8C669   | E3 ubiquitin-protein ligase pellino homolog 1 OS=Mus musculus GN=Peli1 PE=1 SV=2 - [PELI1_MOUSE]                       | 4.55  | 4 | 2  | 2  | 3   | 1.220 | 1.439 | 1.237 | 1.095 | 5.13   | 4.55  | 3  | 3   | 418  | 46.2  | 8.03 |
| Q6KAR6   | Exocyst complex component 3 OS=Mus musculus GN=Exoc3 PE=1 SV=2 - [EXOC3_MOUSE]                                         | 27.28 | 1 | 19 | 19 | 58  | 0.685 | 1.469 | 1.066 | 1.095 | 158.62 | 27.28 | 35 | 58  | 755  | 86.4  | 6.20 |
| Q8CAK1   | Putative transferase CAF17 homolog, mitochondrial OS=Mus musculus GN=Iba57 PE=2 SV=1 - [CAF17_MOUSE]                   | 24.02 | 2 | 6  | 6  | 13  | 1.017 | 1.362 | 1.263 | 1.095 | 38.64  | 24.02 | 9  | 13  | 358  | 38.4  | 9.01 |
| P80560   | Receptor-type tyrosine-protein phosphatase N2 OS=Mus musculus GN=Ptpn2 PE=1 SV=2 - [PTPRK2_MOUSE]                      | 37.56 | 1 | 30 | 31 | 132 | 0.977 | 1.176 | 0.881 | 1.095 | 417.47 | 37.56 | 53 | 132 | 1001 | 111.4 | 5.95 |
| Q8BZ9A   | Fructose-2,6-bisphosphatase TIGAR OS=Mus musculus GN=Tigar PE=2 SV=1 - [TIGAR_MOUSE]                                   | 36.06 | 1 | 5  | 5  | 19  | 1.019 | 1.081 | 0.901 | 1.095 | 61.86  | 36.06 | 9  | 19  | 269  | 29.2  | 8.18 |
| P49446-2 | Isoform 2 of Receptor-type tyrosine-protein phosphatase epsilon OS=Mus musculus GN=Ptpre - [PTPRE_MOUSE]               | 30.06 | 3 | 14 | 16 | 58  | 0.947 | 1.222 | 1.051 | 1.095 | 159.47 | 30.06 | 28 | 58  | 642  | 74.7  | 7.80 |
| A2A4N9   | ATP-dependent RNA helicase DHX8 (Fragment) OS=Mus musculus GN=Dhx8 PE=2 SV=1 - [A2A4N9_MOUSE]                          | 3.15  | 2 | 2  | 3  | 7   | 0.458 | 0.858 | 1.058 | 1.095 | 14.19  | 3.15  | 3  | 7   | 1175 | 134.4 | 7.40 |
| Q8K212   | Phosphofurin acidic cluster sorting protein 1 OS=Mus musculus GN=Pacs1 PE=1 SV=2 - [PACCS1_MOUSE]                      | 37.98 | 1 | 27 | 29 | 117 | 0.716 | 1.056 | 1.097 | 1.095 | 314.77 | 37.98 | 51 | 117 | 961  | 104.8 | 7.74 |
| P21237   | Brain-derived neurotrophic factor OS=Mus musculus GN=Bdnf PE=1 SV=1 - [BDNF_MOUSE]                                     | 11.24 | 3 | 2  | 2  | 3   | 1.614 | 0.720 | 0.860 | 1.095 | 7.40   | 11.24 | 3  | 3   | 249  | 28.1  | 8.66 |
| P17427   | AP-2 complex subunit alpha-2 OS=Mus musculus GN=Ap2a2 PE=1 SV=2 - [AP2A2_MOUSE]                                        | 54.80 | 2 | 34 | 50 | 355 | 0.527 | 1.486 | 1.147 | 1.095 | 995.62 | 54.80 | 92 | 355 | 938  | 104.0 | 6.93 |
| Q921G8   | Gamma-tubulin complex component 2 OS=Mus musculus GN=Tubgcp2 PE=2 SV=2 - [GCP2_MOUSE]                                  | 25.30 | 1 | 19 | 19 | 57  | 0.736 | 1.210 | 0.907 | 1.096 | 176.19 | 25.30 | 32 | 57  | 905  | 103.2 | 6.77 |
| Q8VCN9   | Tubulin-specific chaperone C OS=Mus musculus GN=Tbcc PE=2 SV=1 - [TBCC_MOUSE]                                          | 31.38 | 1 | 10 | 10 | 32  | 1.158 | 1.033 | 1.001 | 1.096 | 118.60 | 31.38 | 17 | 32  | 341  | 38.1  | 5.30 |
| P49442   | Inositol polyphosphate 1-phosphatase OS=Mus musculus GN=Inpp1 PE=1 SV=2 - [INPP_MOUSE]                                 | 38.64 | 5 | 14 | 14 | 35  | 0.567 | 1.054 | 0.901 | 1.096 | 105.46 | 38.64 | 22 | 35  | 396  | 43.3  | 5.01 |
| P58281-2 | Isoform 2 of Dynamin-like 120 kDa protein, mitochondrial OS=Mus musculus GN=Opa1 - [OPA1_MOUSE]                        | 52.26 | 5 | 50 | 51 | 255 | 0.791 | 1.126 | 1.136 | 1.096 | 810.68 | 52.26 | 87 | 255 | 997  | 115.5 | 7.55 |
| Q80UG1   | Fatty acid desaturase 6 OS=Mus musculus GN=Fads6 PE=2 SV=1 - [FADS6_MOUSE]                                             | 2.05  | 1 | 1  | 1  | 1   | 0.372 | 0.506 | 0.959 | 1.096 | 2.27   | 2.05  | 1  | 1   | 342  | 38.8  | 8.46 |
| Q8VHX6-2 | Isoform 2 of Filamin-C OS=Mus musculus GN=Flnc - [FLNC_MOUSE]                                                          | 17.23 | 4 | 27 | 35 | 90  | 1.821 | 2.037 | 0.798 | 1.096 | 274.95 | 17.23 | 58 | 90  | 2693 | 287.2 | 5.95 |
| Q9CPU0   | Lactoylglutathione lyase OS=Mus musculus GN=Glo1 PE=1 SV=3 - [LGUL_MOUSE]                                              | 57.07 | 1 | 13 | 13 | 90  | 2.050 | 0.890 | 0.870 | 1.096 | 262.52 | 57.07 | 23 | 90  | 184  | 20.8  | 5.47 |
| P32037   | Solute carrier family 2, facilitated glucose transporter member 3 OS=Mus musculus GN=Slc2a3 PE=1 SV=1 - [SLC2A3_MOUSE] | 20.69 | 2 | 9  | 9  | 65  | 0.492 | 1.156 | 1.202 | 1.096 | 205.08 | 20.69 | 15 | 65  | 493  | 53.4  | 4.98 |
| Q8VBV7   | COP9 signalosome complex subunit 8 OS=Mus musculus GN=Cops8 PE=1 SV=1 - [COPS8_MOUSE]                                  | 38.28 | 1 | 6  | 6  | 48  | 0.884 | 1.271 | 1.055 | 1.096 | 141.03 | 38.28 | 11 | 48  | 209  | 23.2  | 5.20 |
| A2ARL5   | Protein Gm14419 OS=Mus musculus GN=Gm14419 PE=2 SV=1 - [A2ARL5_MOUSE]                                                  | 1.37  | 1 | 1  | 1  | 1   | 0.782 | 1.214 | 1.233 | 1.097 | 0.00   | 1.37  | 1  | 1   | 582  | 67.1  | 9.23 |
| Q9DB20   | ATP synthase subunit O, mitochondrial OS=Mus musculus GN=Atp5o PE=1 SV=1 - [ATPO_MOUSE]                                | 62.44 | 2 | 10 | 15 | 223 | 0.747 | 0.883 | 1.035 | 1.097 | 573.73 | 62.44 | 28 | 223 | 213  | 23.3  | 9.99 |
| P21995   | Embigin OS=Mus musculus GN=Emb PE=1 SV=2 - [EMB_MOUSE]                                                                 | 22.42 | 1 | 7  | 8  | 44  | 0.987 | 1.073 | 0.876 | 1.097 | 99.16  | 22.42 | 14 | 44  | 330  | 37.0  | 6.02 |
| Q4QQM5   | Protein FAM73A OS=Mus musculus GN=Fam73a PE=2 SV=1 - [FA73A_MOUSE]                                                     | 23.00 | 3 | 9  | 9  | 21  | 0.654 | 0.838 | 0.922 | 1.097 | 72.25  | 23.00 | 14 | 21  | 600  | 67.5  | 5.48 |
| Q3UM45   | Protein phosphatase 1 regulatory subunit 7 OS=Mus musculus GN=Ppp1r7 PE=1 SV=2 - [PP1R7_MOUSE]                         | 54.57 | 2 | 17 | 17 | 104 | 1.143 | 2.092 | 1.342 | 1.097 | 294.84 | 54.57 | 32 | 104 | 361  | 41.3  | 4.92 |

|          |                                                                                                                    |       |    |    |    |     |       |       |       |       |         |       |     |     |      |       |       |
|----------|--------------------------------------------------------------------------------------------------------------------|-------|----|----|----|-----|-------|-------|-------|-------|---------|-------|-----|-----|------|-------|-------|
| A2AST1   | Coiled-coil protein associated with myosin II and DISC1 OS=Mus musculus GN=Ccdc141 PE=2 SV=1 - [A2AST1_MOUSE]      | 8.48  | 4  | 12 | 12 | 29  | 1.132 | 0.964 | 0.941 | 1.097 | 78.86   | 8.48  | 20  | 29  | 1451 | 164.8 | 5.63  |
| Q80WC7-2 | Form 2 of Arf-GAP domain and FG repeat-containing protein 2 OS=Mus musculus GN=Agfg2 - [Q80WC7_MOUSE]              | 46.02 | 4  | 10 | 12 | 36  | 1.030 | 1.336 | 1.208 | 1.097 | 102.99  | 46.02 | 22  | 36  | 289  | 30.7  | 9.44  |
| Q8BY16-2 | Form 2 of Lysophosphatidylcholine acyltransferase 2 OS=Mus musculus GN=Lpcat2 - [PCAT2_MOUSE]                      | 6.94  | 3  | 4  | 4  | 8   | 0.773 | 0.669 | 0.857 | 1.097 | 11.74   | 6.94  | 7   | 8   | 504  | 55.8  | 5.48  |
| P80317   | T-complex protein 1 subunit zeta OS=Mus musculus GN=Cct6a PE=1 SV=3 - [TCPZ_MOUSE]                                 | 60.83 | 4  | 31 | 31 | 164 | 0.949 | 1.114 | 0.930 | 1.097 | 514.79  | 60.83 | 51  | 164 | 531  | 58.0  | 7.08  |
| Q9DBG3   | AP-2 complex subunit beta OS=Mus musculus GN=Ap2b1 PE=1 SV=1 - [AP2B1_MOUSE]                                       | 66.60 | 10 | 32 | 59 | 552 | 0.881 | 1.371 | 1.126 | 1.097 | 1521.41 | 66.60 | 103 | 552 | 937  | 104.5 | 5.38  |
| D3YXV0   | Otofelin (Fragment) OS=Mus musculus GN=Otof PE=2 SV=1 - [D3YXV0_MOUSE]                                             | 4.92  | 5  | 7  | 8  | 10  | 1.335 | 1.001 | 1.451 | 1.097 | 23.41   | 4.92  | 10  | 10  | 1932 | 219.0 | 5.53  |
| Q9DB40-2 | Form 2 of Mediator of RNA polymerase II transcription subunit 27 OS=Mus musculus GN=Med27 - [Q9DB40_MOUSE]         | 15.87 | 2  | 2  | 2  | 12  | 0.959 | 1.072 | 0.968 | 1.097 | 28.84   | 15.87 | 4   | 12  | 208  | 23.1  | 9.26  |
| Q80XC3   | USP6 N-terminal-like protein OS=Mus musculus GN=Usp6nl PE=1 SV=2 - [US6NL_MOUSE]                                   | 8.67  | 2  | 6  | 6  | 9   | 1.038 | 1.002 | 1.246 | 1.097 | 16.71   | 8.67  | 7   | 9   | 819  | 93.5  | 9.13  |
| Q8K3G9   | DCC-interacting protein 13-beta OS=Mus musculus GN=App12 PE=2 SV=1 - [DP13B_MOUSE]                                 | 38.82 | 5  | 19 | 20 | 57  | 0.710 | 0.905 | 0.948 | 1.097 | 166.24  | 38.82 | 32  | 57  | 662  | 73.8  | 5.03  |
| Q8BGW1   | Alpha-ketoglutarate-dependent dioxygenase FTO OS=Mus musculus GN=Fto PE=1 SV=1 - [FTO_MOUSE]                       | 33.07 | 6  | 16 | 16 | 35  | 0.855 | 0.863 | 0.878 | 1.097 | 93.23   | 33.07 | 27  | 35  | 502  | 58.0  | 5.12  |
| Q9D6L8   | Peptidyl-prolyl cis-trans isomerase-like 3 OS=Mus musculus GN=Ppil3 PE=2 SV=1 - [PPIL3_MOUSE]                      | 27.33 | 2  | 4  | 4  | 13  | 1.393 | 1.340 | 1.127 | 1.098 | 31.38   | 27.33 | 7   | 13  | 161  | 18.1  | 6.79  |
| O89050   | Muskelin OS=Mus musculus GN=Mkln1 PE=2 SV=1 - [MKLN1_MOUSE]                                                        | 10.88 | 1  | 6  | 6  | 15  | 0.902 | 1.328 | 0.945 | 1.098 | 38.35   | 10.88 | 10  | 15  | 735  | 84.8  | 6.34  |
| P63040   | Complexin-1 OS=Mus musculus GN=Cplx1 PE=1 SV=1 - [CPLX1_MOUSE]                                                     | 51.49 | 2  | 3  | 6  | 123 | 2.037 | 0.789 | 1.623 | 1.098 | 353.31  | 51.49 | 10  | 123 | 134  | 15.1  | 4.97  |
| A2AJA9   | Uncharacterized protein C9orf172 homolog OS=Mus musculus GN=Gm996 PE=1 SV=1 - [C1172_MOUSE]                        | 36.65 | 2  | 26 | 26 | 84  | 0.704 | 1.191 | 1.379 | 1.098 | 279.33  | 36.65 | 44  | 84  | 974  | 107.1 | 9.11  |
| Q9D114   | Guanosine-3',5'-bis(diphosphate) 3'-pyrophosphohydrolase MESH1 OS=Mus musculus GN=Hddc3 PE=2 SV=1 - [MESH1_MOUSE]  | 15.64 | 1  | 2  | 2  | 4   | 1.418 | 1.289 | 1.250 | 1.098 | 12.33   | 15.64 | 4   | 4   | 179  | 20.2  | 5.96  |
| G3X909   | Slit homolog 2 protein OS=Mus musculus GN=Slit2 PE=2 SV=1 - [G3X909_MOUSE]                                         | 2.00  | 6  | 1  | 1  | 3   | 1.453 | 0.776 | 2.419 | 1.098 | 0.00    | 2.00  | 1   | 3   | 851  | 95.4  | 8.54  |
| Q8R4G0-4 | Form 4 of Netrin-G1 OS=Mus musculus GN=Ntng1 - [NTNG1_MOUSE]                                                       | 18.96 | 9  | 2  | 7  | 22  | 0.627 | 1.402 | 1.199 | 1.098 | 65.97   | 18.96 | 13  | 22  | 480  | 53.9  | 6.92  |
| G3UXW9   | COP9 signalosome complex subunit 1 OS=Mus musculus GN=Gps1 PE=4 SV=1 - [G3UXW9_MOUSE]                              | 42.40 | 5  | 19 | 20 | 71  | 0.881 | 1.257 | 0.890 | 1.098 | 228.71  | 42.40 | 33  | 71  | 526  | 58.8  | 6.74  |
| E9QAN9   | Interferon-activable protein 203 OS=Mus musculus GN=Irf203 PE=2 SV=1 - [E9QAN9_MOUSE]                              | 3.33  | 4  | 2  | 2  | 4   | 1.482 | 1.231 | 1.589 | 1.098 | 2.64    | 3.33  | 2   | 4   | 871  | 95.2  | 9.77  |
| Q8VHK5   | Membrane protein MLC1 OS=Mus musculus GN=Mlcl PE=2 SV=1 - [MLC1_MOUSE]                                             | 9.95  | 2  | 4  | 4  | 15  | 0.567 | 0.728 | 1.049 | 1.099 | 48.15   | 9.95  | 7   | 15  | 382  | 41.6  | 7.90  |
| Q91VE6-2 | Form 2 of MKI67 FHA domain-interacting nuclear phosphoprotein OS=Mus musculus GN=Mki67p - [Q91VE6_MOUSE]           | 12.64 | 2  | 3  | 3  | 6   | 0.709 | 0.821 | 0.850 | 1.099 | 23.55   | 12.64 | 4   | 6   | 269  | 30.6  | 10.20 |
| P80315   | T-complex protein 1 subunit delta OS=Mus musculus GN=Cct4 PE=1 SV=3 - [TCPD_MOUSE]                                 | 66.42 | 5  | 32 | 33 | 233 | 0.629 | 0.904 | 0.851 | 1.099 | 681.62  | 66.42 | 61  | 233 | 539  | 58.0  | 8.02  |
| Q8BGC4   | Zinc-binding alcohol dehydrogenase domain-containing protein 2 OS=Mus musculus GN=Zadh2 PE=2 SV=1 - [Q8BGC4_MOUSE] | 41.11 | 1  | 11 | 11 | 36  | 0.922 | 1.157 | 1.048 | 1.099 | 103.07  | 41.11 | 21  | 36  | 377  | 40.5  | 7.42  |
| Q6WKZ8   | E3 ubiquitin-protein ligase UBR2 OS=Mus musculus GN=Ubr2 PE=1 SV=2 - [UBR2_MOUSE]                                  | 4.22  | 3  | 8  | 8  | 21  | 0.777 | 0.873 | 1.048 | 1.099 | 57.70   | 4.22  | 11  | 21  | 1755 | 199.0 | 6.33  |
| D3YXZ3   | Kinesin light chain 2 OS=Mus musculus GN=Klc2 PE=4 SV=1 - [D3YXZ3_MOUSE]                                           | 56.40 | 4  | 25 | 31 | 171 | 1.201 | 0.830 | 1.145 | 1.099 | 485.72  | 56.40 | 58  | 171 | 617  | 68.1  | 7.06  |

|          |                                                                                                                        |       |   |    |    |     |       |       |       |       |        |       |    |     |      |       |      |
|----------|------------------------------------------------------------------------------------------------------------------------|-------|---|----|----|-----|-------|-------|-------|-------|--------|-------|----|-----|------|-------|------|
| E9PX19   | Microcephalin OS=Mus musculus GN=McpH1 PE=2 SV=1 - [E9PX19_MOUSE]                                                      | 3.50  | 4 | 2  | 2  | 2   | 2.674 | 1.115 | 1.043 | 1.099 | 3.04   | 3.50  | 2  | 2   | 600  | 65.6  | 7.11 |
| Q8BGZ3   | DBB1- and CUL4-associated factor 12 OS=Mus musculus GN=Dcaf12 PE=2 SV=1 - [Q8BGZ3_MOUSE]                               | 1.55  | 1 | 1  | 1  | 1   | 1.701 | 0.980 | 1.842 | 1.099 | 2.47   | 1.55  | 1  | 1   | 453  | 50.4  | 9.03 |
| O09172   | Glutamate--cysteine ligase regulatory subunit OS=Mus musculus GN=Gclm PE=2 SV=1 - [GSH0_MOUSE]                         | 32.85 | 3 | 9  | 9  | 37  | 1.156 | 0.845 | 0.810 | 1.099 | 127.46 | 32.85 | 16 | 37  | 274  | 30.5  | 5.52 |
| Q9Z2L7   | Cytokine receptor-like factor 3 OS=Mus musculus GN=Crlf3 PE=2 SV=1 - [CRLF3_MOUSE]                                     | 5.43  | 4 | 2  | 2  | 4   | 1.208 | 1.131 | 0.908 | 1.099 | 14.07  | 5.43  | 2  | 4   | 442  | 49.5  | 5.03 |
| Q99M80-4 | Isoform 4 of Receptor-type tyrosine-protein phosphatase T OS=Mus musculus GN=Ptptr - [PTPRT_MOUSE]                     | 22.72 | 6 | 23 | 24 | 67  | 1.049 | 1.363 | 1.049 | 1.099 | 199.61 | 22.72 | 43 | 67  | 1435 | 161.1 | 6.84 |
| Q78J03   | Methionine-R-sulfoxide reductase B2, mitochondrial OS=Mus musculus GN=Msb2 PE=1 SV=1 - [MSRB2_MOUSE]                   | 34.86 | 1 | 8  | 8  | 28  | 1.607 | 1.025 | 1.529 | 1.099 | 83.40  | 34.86 | 14 | 28  | 175  | 19.1  | 9.06 |
| E9QKE4   | Rab3 GTPase-activating protein non-catalytic subunit OS=Mus musculus GN=Rab3gap2 PE=2 SV=1 - [E9QKE4_MOUSE]            | 33.74 | 4 | 42 | 42 | 152 | 0.583 | 1.182 | 0.978 | 1.099 | 498.00 | 33.74 | 69 | 152 | 1387 | 154.5 | 6.07 |
| O08532-5 | Isoform 2E of Voltage-dependent calcium channel subunit alpha-2/delta-1 OS=Mus musculus GN=Cacna2d1 - [CACNA2D1_MOUSE] | 44.64 | 6 | 41 | 42 | 268 | 0.780 | 1.913 | 1.013 | 1.099 | 737.72 | 44.64 | 73 | 268 | 1091 | 123.2 | 5.27 |
| E9QL80   | Acyl-CoA:lysophosphatidylglycerol acyltransferase 1 OS=Mus musculus GN=Lipat1 PE=2 SV=1 - [LIPAT1_MOUSE]               | 19.80 | 4 | 9  | 9  | 24  | 0.521 | 0.894 | 0.968 | 1.099 | 66.31  | 19.80 | 16 | 24  | 409  | 47.0  | 9.03 |
| P70280   | Vesicle-associated membrane protein 7 OS=Mus musculus GN=Vamp7 PE=1 SV=1 - [VAMP7_MOUSE]                               | 31.36 | 1 | 8  | 8  | 26  | 0.548 | 0.861 | 0.891 | 1.099 | 70.74  | 31.36 | 13 | 26  | 220  | 25.0  | 8.60 |
| P62077   | Mitochondrial import inner membrane translocase subunit Tim8 B OS=Mus musculus GN=Timm8b PE=3 SV=1 - [TIM8B_MOUSE]     | 54.22 | 1 | 5  | 5  | 19  | 1.717 | 0.776 | 1.521 | 1.099 | 54.75  | 54.22 | 8  | 19  | 83   | 9.3   | 5.12 |
| Q14CH0-2 | Isoform 2 of Protein FAM171B OS=Mus musculus GN=Fam171b - [F171B_MOUSE]                                                | 33.13 | 3 | 20 | 21 | 87  | 1.351 | 1.228 | 1.412 | 1.099 | 236.76 | 33.13 | 37 | 87  | 821  | 91.5  | 8.37 |
| P54818   | Galactocerebrosidase OS=Mus musculus GN=Galc PE=1 SV=2 - [GALC_MOUSE]                                                  | 6.43  | 1 | 4  | 4  | 15  | 1.049 | 0.877 | 0.933 | 1.100 | 37.76  | 6.43  | 7  | 15  | 684  | 77.2  | 6.74 |
| Q8BG26   | RUN and SH3 domain-containing protein 1 OS=Mus musculus GN=Rusc1 PE=1 SV=2 - [RUSC1_MOUSE]                             | 13.21 | 3 | 9  | 9  | 16  | 1.051 | 0.912 | 1.091 | 1.100 | 50.47  | 13.21 | 13 | 16  | 893  | 95.1  | 6.02 |
| Q0GA42   | Metal transporter CNM1 OS=Mus musculus GN=Cnm1 PE=1 SV=5 - [CNM1_MOUSE]                                                | 19.24 | 1 | 12 | 16 | 53  | 0.960 | 0.919 | 1.055 | 1.100 | 136.71 | 19.24 | 25 | 53  | 951  | 103.9 | 6.51 |
| Q9DCL9   | Multifunctional protein ADE2 OS=Mus musculus GN=Paics PE=1 SV=4 - [PURE_MOUSE]                                         | 44.47 | 3 | 20 | 21 | 87  | 0.926 | 0.926 | 1.025 | 1.100 | 261.20 | 44.47 | 36 | 87  | 425  | 47.0  | 7.23 |
| Q3UE37   | Ubiquitin-conjugating enzyme E2 Z OS=Mus musculus GN=Ube2z PE=1 SV=2 - [UBE2Z_MOUSE]                                   | 19.66 | 1 | 7  | 7  | 34  | 0.633 | 0.940 | 0.916 | 1.100 | 86.77  | 19.66 | 13 | 34  | 356  | 38.3  | 5.62 |
| A2AED5   | RIKEN cDNA 4921515J06 OS=Mus musculus GN=Henmt1 PE=4 SV=1 - [A2AED5_MOUSE]                                             | 6.87  | 2 | 1  | 1  | 1   | 0.864 | 1.333 | 0.884 | 1.100 | 2.31   | 6.87  | 1  | 1   | 262  | 29.5  | 6.61 |
| Q64337   | Sequestosome-1 OS=Mus musculus GN=Sqstm1 PE=1 SV=1 - [SQSTM_MOUSE]                                                     | 26.92 | 4 | 7  | 7  | 25  | 1.283 | 0.938 | 1.088 | 1.100 | 52.92  | 26.92 | 10 | 25  | 442  | 48.1  | 5.21 |
| Q6PHS9-4 | Isoform 4 of Voltage-dependent calcium channel subunit alpha-2/delta-2 OS=Mus musculus GN=Cacna2d2 - [CACNA2D2_MOUSE]  | 26.42 | 7 | 26 | 27 | 134 | 0.620 | 0.465 | 0.792 | 1.100 | 403.56 | 26.42 | 47 | 134 | 1147 | 129.6 | 5.60 |
| Q8K021   | Secretory carrier-associated membrane protein 1 OS=Mus musculus GN=Scamp1 PE=1 SV=1 - [SCAMP1_MOUSE]                   | 36.69 | 3 | 9  | 9  | 127 | 0.928 | 1.138 | 1.095 | 1.100 | 376.74 | 36.69 | 17 | 127 | 338  | 38.0  | 7.71 |
| Q923X4-2 | Isoform 2 of Glutaredoxin-2, mitochondrial OS=Mus musculus GN=Glx2 - [GLRX2_MOUSE]                                     | 23.58 | 3 | 2  | 2  | 3   | 1.762 | 1.174 | 1.159 | 1.100 | 10.04  | 23.58 | 3  | 3   | 123  | 14.0  | 8.94 |
| Q9CYW4   | Haloacetic dehalogenase-like hydrolase domain-containing protein 3 OS=Mus musculus GN=Hhd3 PE=2 SV=1 - [HDHD3_MOUSE]   | 39.44 | 1 | 8  | 8  | 27  | 1.268 | 1.307 | 1.322 | 1.100 | 76.46  | 39.44 | 16 | 27  | 251  | 28.0  | 6.80 |



|          |                                                                                                                                                                    |       |   |    |    |     |       |       |       |       |        |       |    |     |      |       |      |
|----------|--------------------------------------------------------------------------------------------------------------------------------------------------------------------|-------|---|----|----|-----|-------|-------|-------|-------|--------|-------|----|-----|------|-------|------|
| Q9D2G2   | Dihydropolypyllysine-residue succinyltransferase component of 2-oxoglutarate dehydrogenase complex, mitochondrial OS=Mus musculus GN=Dist PE=1 SV=1 - [ODO2_MOUSE] | 38.99 | 2 | 15 | 15 | 191 | 1.706 | 0.839 | 1.007 | 1.100 | 534.17 | 38.99 | 26 | 191 | 454  | 49.0  | 8.95 |
| Q8VCE2   | GPN-loop GTPase 1 OS=Mus musculus GN=Gpn1 PE=1 SV=1 - [GPN1_MOUSE]                                                                                                 | 15.32 | 1 | 4  | 4  | 14  | 0.799 | 1.160 | 0.954 | 1.100 | 44.36  | 15.32 | 7  | 14  | 372  | 41.6  | 4.88 |
| P21761   | Thyrotropin-releasing hormone receptor OS=Mus musculus GN=Trhr PE=2 SV=1 - [TRFR_MOUSE]                                                                            | 10.18 | 1 | 3  | 3  | 6   | 0.873 | 2.010 | 1.176 | 1.100 | 17.45  | 10.18 | 4  | 6   | 393  | 44.5  | 8.37 |
| P80318   | T-complex protein 1 subunit gamma OS=Mus musculus GN=Cct3 PE=1 SV=1 - [TCPG_MOUSE]                                                                                 | 61.65 | 6 | 33 | 33 | 242 | 0.630 | 0.926 | 0.855 | 1.101 | 726.46 | 61.65 | 60 | 242 | 545  | 60.6  | 6.70 |
| AZARA8-2 | Isoform 2 of Integrin alpha 8 OS=Mus musculus GN=Itga8 - [IT8_MOUSE]                                                                                               | 3.50  | 3 | 1  | 1  | 2   | 1.374 | 2.237 | 0.788 | 1.101 | 5.41   | 3.50  | 2  | 2   | 286  | 31.0  | 7.27 |
| E9Q5Y2   | Splicing factor U2AF 26 kDa subunit OS=Mus musculus GN=U2af1H PE=2 SV=1 -                                                                                          | 9.39  | 8 | 1  | 2  | 6   | 1.344 | 0.749 | 1.226 | 1.101 | 8.72   | 9.39  | 3  | 6   | 181  | 21.3  | 8.98 |
| Q8K0W3   | RING finger protein 208 OS=Mus musculus GN=Rnf208 PE=2 SV=2 - [RN208_MOUSE]                                                                                        | 8.30  | 1 | 1  | 1  | 1   | 6.261 | 5.943 | 1.168 | 1.101 | 3.54   | 8.30  | 1  | 1   | 265  | 28.4  | 7.49 |
| Q99J0    | Mitogen-activated protein kinase kinase kinase OS=Mus musculus GN=Map4k3 PE=1 SV=4 -                                                                               | 16.89 | 2 | 12 | 14 | 33  | 0.910 | 1.025 | 1.081 | 1.101 | 91.27  | 16.89 | 25 | 33  | 894  | 101.1 | 7.64 |
| Q8BUW1   | Potassium channel, subfamily K, member 10 OS=Mus musculus GN=Kcnk10 PE=2 SV=1 - [Q8BUW1_MOUSE]                                                                     | 5.23  | 1 | 2  | 2  | 6   | 1.301 | 0.907 | 1.159 | 1.101 | 9.41   | 5.23  | 3  | 6   | 535  | 59.4  | 8.82 |
| O54833   | Casein kinase II subunit alpha' OS=Mus musculus GN=Csk2a2 PE=2 SV=1 - [CSK22_MOUSE]                                                                                | 49.71 | 1 | 13 | 16 | 71  | 0.685 | 0.973 | 1.093 | 1.101 | 215.14 | 49.71 | 28 | 71  | 350  | 41.2  | 8.56 |
| O88428   | Bifunctional 3'-phosphoadenosine 5'-phosphosulfate synthase 2 OS=Mus musculus GN=Paps2 PE=1 SV=2 -                                                                 | 15.46 | 1 | 5  | 8  | 22  | 1.309 | 0.999 | 1.179 | 1.101 | 63.48  | 15.46 | 13 | 22  | 621  | 70.3  | 7.58 |
| D3Z7P3-2 | Isoform 2 of Glutaminase kidney isoform, mitochondrial OS=Mus musculus GN=Gls -                                                                                    | 43.95 | 4 | 1  | 24 | 118 | 1.496 | 1.343 | 1.720 | 1.101 | 398.40 | 43.95 | 40 | 118 | 603  | 66.0  | 8.12 |
| P60882   | Multiple epidermal growth factor-like domains protein 8 OS=Mus musculus GN=Megf8 PE=2 SV=2 - [MEGF8_MOUSE]                                                         | 1.69  | 1 | 4  | 4  | 8   | 0.808 | 0.851 | 0.898 | 1.101 | 17.39  | 1.69  | 7  | 8   | 2789 | 297.3 | 6.80 |
| Q8R2U4   | N-terminal Xaa-Pro-Lys N-methyltransferase 1 OS=Mus musculus GN=Ntmt1 PE=2 SV=3 - [NTM1A_MOUSE]                                                                    | 30.04 | 2 | 5  | 5  | 15  | 1.274 | 1.227 | 1.165 | 1.101 | 40.53  | 30.04 | 7  | 15  | 223  | 25.4  | 6.90 |
| Q9JII6   | Alcohol dehydrogenase [NADP(+)] OS=Mus musculus GN=Akr1a1 PE=1 SV=3 -                                                                                              | 53.54 | 2 | 16 | 17 | 142 | 0.819 | 1.225 | 1.028 | 1.101 | 382.57 | 53.54 | 28 | 142 | 325  | 36.6  | 7.39 |
| Q8BNN1   | Spermatogenesis-associated protein 2-like protein OS=Mus musculus GN=Spata2l PE=2 SV=1 - [SPA2L_MOUSE]                                                             | 25.59 | 1 | 7  | 7  | 24  | 1.506 | 2.083 | 1.742 | 1.101 | 58.97  | 25.59 | 12 | 24  | 426  | 46.7  | 5.20 |
| Q9CRB9   | Coiled-coil-helix-coiled-coil-helix domain-containing protein 3, mitochondrial OS=Mus musculus GN=Chchd3 PE=1 SV=1 - [CHCH3_MOUSE]                                 | 51.98 | 4 | 17 | 17 | 187 | 1.451 | 0.941 | 1.220 | 1.101 | 501.57 | 51.98 | 29 | 187 | 227  | 26.3  | 8.37 |
| Q8C7D2-2 | Isoform 2 of Protein cereblon OS=Mus musculus GN=Crbn - [CRBN_MOUSE]                                                                                               | 12.76 | 3 | 4  | 4  | 16  | 1.048 | 0.880 | 1.141 | 1.101 | 47.35  | 12.76 | 7  | 16  | 431  | 49.5  | 5.45 |
| P63248   | cAMP-dependent protein kinase inhibitor alpha OS=Mus musculus GN=PkiA PE=1 SV=2 - [PKA_MOUSE]                                                                      | 51.32 | 1 | 3  | 3  | 33  | 1.632 | 1.451 | 1.488 | 1.101 | 90.21  | 51.32 | 6  | 33  | 76   | 8.0   | 4.54 |
| Q99KK9   | Probable histidine-tRNA ligase, mitochondrial OS=Mus musculus GN=Hars2 PE=2 SV=1 - [SYHM_MOUSE]                                                                    | 27.92 | 2 | 11 | 14 | 38  | 0.837 | 0.892 | 0.979 | 1.101 | 91.73  | 27.92 | 21 | 38  | 505  | 56.9  | 8.32 |
| O88441   | Metaxin-2 OS=Mus musculus GN=Mbx2 PE=1 SV=1 - [MTX2_MOUSE]                                                                                                         | 53.23 | 1 | 10 | 10 | 78  | 0.910 | 1.259 | 1.038 | 1.101 | 255.41 | 53.23 | 18 | 78  | 263  | 29.7  | 5.63 |
| Q8CG72   | Poly(ADP-ribose) glycohydrolase ARH3 OS=Mus musculus GN=Adprh2 PE=1 SV=1 - [ARHL2_MOUSE]                                                                           | 31.62 | 4 | 8  | 9  | 35  | 1.069 | 0.908 | 0.964 | 1.101 | 118.15 | 31.62 | 15 | 35  | 370  | 39.4  | 4.96 |
| A2AF47   | Dedicator of cytokinesis protein 11 OS=Mus musculus GN=Dock11 PE=1 SV=1 -                                                                                          | 7.81  | 2 | 8  | 14 | 27  | 0.876 | 0.996 | 0.814 | 1.101 | 70.65  | 7.81  | 22 | 27  | 2073 | 237.6 | 7.78 |

|          |                                                                                                                          |       |     |    |    |     |       |       |       |       |         |       |    |     |      |       |       |
|----------|--------------------------------------------------------------------------------------------------------------------------|-------|-----|----|----|-----|-------|-------|-------|-------|---------|-------|----|-----|------|-------|-------|
| Q0VF55   | ATPase, Ca++<br>transporting, plasma<br>membrane 3 OS=Mus<br>musculus GN=Atp2b3<br>PE=2 SV=1 -<br>[ATP2B_MOUSE]          | 37.87 | 2   | 1  | 46 | 320 | 0.495 | 0.667 | 1.313 | 1.102 | 875.61  | 37.87 | 77 | 320 | 1220 | 134.3 | 5.69  |
| Q9QZ59-2 | Isoform 2 of Doublesex-<br>and mab-3-related<br>transcription factor 1<br>OS=Mus musculus<br>GN=Dmrt1 -<br>[DMRT1_MOUSE] | 15.57 | 3   | 1  | 1  | 18  | 1.444 | 1.481 | 1.028 | 1.102 | 42.15   | 15.57 | 1  | 18  | 212  | 21.9  | 8.90  |
| Q8BV15   | Syntaxin-16 OS=Mus<br>musculus GN=Sbx16 PE=1<br>SV=3 - [STX16_MOUSE]                                                     | 28.22 | 6   | 8  | 8  | 36  | 0.514 | 1.084 | 0.883 | 1.102 | 112.10  | 28.22 | 15 | 36  | 326  | 37.1  | 5.86  |
| Q8CFE2   | UPF0609 protein C4orf27<br>homolog OS=Mus<br>musculus PE=2 SV=1 -<br>[CD027_MOUSE]                                       | 8.96  | 2   | 3  | 3  | 6   | 1.390 | 1.061 | 0.711 | 1.102 | 13.47   | 8.96  | 6  | 6   | 346  | 39.3  | 7.69  |
| P97813   | Phospholipase D2 OS=Mus<br>musculus GN=Pld2 PE=1<br>SV=2 - [PLD2_MOUSE]                                                  | 6.11  | 4   | 5  | 5  | 12  | 0.799 | 1.061 | 0.926 | 1.102 | 40.58   | 6.11  | 8  | 12  | 933  | 106.1 | 7.39  |
| B1AS29   | Glutamate receptor<br>ionotropic, kainate 3<br>OS=Mus musculus<br>GN=Grik3 PE=2 SV=1 -<br>[GRK3_MOUSE]                   | 12.19 | 1   | 7  | 8  | 14  | 0.762 | 1.021 | 1.037 | 1.102 | 35.21   | 12.19 | 13 | 14  | 919  | 104.0 | 7.52  |
| B1ASQ7   | Protein Gm13212 OS=Mus<br>musculus GN=Gm13212<br>PE=2 SV=1 -<br>[B1ASQ7_MOUSE]                                           | 14.64 | 151 | 1  | 2  | 2   | 1.968 | 1.484 | 1.461 | 1.102 | 4.90    | 14.64 | 2  | 2   | 799  | 94.6  | 8.79  |
| P35293   | Ras-related protein Rab-18<br>OS=Mus musculus<br>GN=Rab18 PE=2 SV=2 -<br>[RAB18_MOUSE]                                   | 62.14 | 1   | 11 | 12 | 50  | 0.746 | 1.000 | 1.037 | 1.102 | 151.60  | 62.14 | 22 | 50  | 206  | 23.0  | 5.36  |
| Q80U30   | Protein CLEC16A OS=Mus<br>musculus GN=Clec16a<br>PE=2 SV=2 -<br>[CL16A_MOUSE]                                            | 8.88  | 6   | 8  | 8  | 15  | 0.804 | 1.031 | 1.135 | 1.102 | 31.84   | 8.88  | 11 | 15  | 1036 | 116.2 | 6.05  |
| Q9R0P9   | Ubiquitin carboxyl-terminal<br>hydrolase isozyme L1<br>OS=Mus musculus<br>GN=Uchl1 PE=1 SV=1 -<br>[UCHL1_MOUSE]          | 87.44 | 1   | 18 | 19 | 771 | 1.750 | 1.207 | 1.340 | 1.102 | 2122.45 | 87.44 | 38 | 771 | 223  | 24.8  | 5.24  |
| E9PX66   | STAGA complex 65 subunit<br>gamma OS=Mus musculus<br>GN=Supt7l PE=2 SV=1 -<br>[E9PX66_MOUSE]                             | 7.85  | 3   | 2  | 2  | 2   | 1.682 | 1.292 | 1.243 | 1.102 | 6.36    | 7.85  | 2  | 2   | 344  | 38.5  | 5.35  |
| Q3V3N7   | Protein Bbs1 OS=Mus<br>musculus GN=Bbs1 PE=2<br>SV=1 - [Q3V3N7_MOUSE]                                                    | 14.33 | 1   | 5  | 6  | 21  | 1.004 | 1.053 | 0.971 | 1.102 | 54.94   | 14.33 | 9  | 21  | 593  | 65.1  | 8.54  |
| Q922D8   | C-1-tetrahydrofolate<br>synthase, cytoplasmic<br>OS=Mus musculus<br>GN=Mthfd1 PE=1 SV=4 -<br>[C1TC_MOUSE]                | 43.42 | 1   | 36 | 37 | 154 | 0.622 | 0.808 | 0.827 | 1.102 | 442.52  | 43.42 | 63 | 154 | 935  | 101.1 | 7.14  |
| Q921M7   | Protein FAM49B OS=Mus<br>musculus GN=Fam49b<br>PE=2 SV=1 -<br>[FA49B_MOUSE]                                              | 62.96 | 1   | 15 | 18 | 151 | 0.595 | 1.116 | 1.041 | 1.102 | 467.32  | 62.96 | 30 | 151 | 324  | 36.8  | 6.06  |
| P84244   | Histone H3.3 OS=Mus<br>musculus GN=H3f3a PE=1<br>SV=2 - [H33_MOUSE]                                                      | 59.56 | 6   | 3  | 11 | 60  | 0.414 | 1.073 | 0.964 | 1.102 | 167.46  | 59.56 | 18 | 60  | 136  | 15.3  | 11.27 |
| Q9CZWH   | Long-chain-fatty-acid-CoA<br>ligase 3 OS=Mus musculus<br>GN=Acsl3 PE=2 SV=2 -<br>[ACSL3_MOUSE]                           | 35.14 | 3   | 18 | 20 | 54  | 0.579 | 0.671 | 0.839 | 1.102 | 169.65  | 35.14 | 32 | 54  | 720  | 80.4  | 8.54  |
| Q6NXM2   | RCC1 and BTB domain-<br>containing protein 1<br>OS=Mus musculus<br>GN=Rctb1 PE=2 SV=1 -<br>[RCBT1_MOUSE]                 | 7.16  | 3   | 3  | 3  | 6   | 1.411 | 0.830 | 0.857 | 1.102 | 19.56   | 7.16  | 6  | 6   | 531  | 58.3  | 6.43  |
| P15208   | Insulin receptor OS=Mus<br>musculus GN=Insr PE=1<br>SV=2 - [INSR_MOUSE]                                                  | 12.17 | 1   | 14 | 15 | 29  | 0.912 | 1.093 | 0.985 | 1.102 | 76.61   | 12.17 | 25 | 29  | 1372 | 155.5 | 5.95  |
| O35454   | Chloride transport protein<br>6 OS=Mus musculus<br>GN=Cln6 PE=1 SV=1 -<br>[CLCN6_MOUSE]                                  | 15.17 | 3   | 9  | 9  | 24  | 0.924 | 0.812 | 0.962 | 1.103 | 72.98   | 15.17 | 14 | 24  | 870  | 96.9  | 7.02  |
| Q9QYR7-2 | Isoform 2 of Acyl-<br>coenzyme A thioesterase 3<br>OS=Mus musculus<br>GN=Acot3 -                                         | 20.90 | 4   | 2  | 5  | 12  | 0.962 | 0.940 | 0.879 | 1.103 | 37.20   | 20.90 | 9  | 12  | 421  | 46.2  | 7.24  |
| Q91WF7   | Polyphosphoinositide<br>phosphatase OS=Mus<br>musculus GN=Fig4 PE=1<br>SV=1 - [FIG4_MOUSE]                               | 9.59  | 1   | 8  | 8  | 17  | 0.760 | 1.152 | 0.921 | 1.103 | 42.31   | 9.59  | 13 | 17  | 907  | 103.4 | 6.98  |
| Q8K0S2   | Uncharacterized protein<br>C8orf47 homolog OS=Mus<br>musculus PE=2 SV=1 -<br>[CH047_MOUSE]                               | 16.02 | 1   | 5  | 5  | 14  | 1.634 | 1.959 | 1.620 | 1.103 | 37.94   | 16.02 | 7  | 14  | 362  | 38.5  | 4.82  |
| Q9D0C4-2 | Isoform 2 of tRNA<br>(guanine(37)-N1)-<br>methyltransferase OS=Mus<br>musculus GN=Trmt5 -<br>[TRMS_MOUSE]                | 7.39  | 2   | 3  | 3  | 4   | 1.062 | 1.243 | 0.950 | 1.103 | 9.36    | 7.39  | 4  | 4   | 487  | 55.4  | 8.32  |
| P24527   | Leukotriene A-4 hydrolase<br>OS=Mus musculus<br>GN=Lta4h PE=1 SV=4 -<br>[LKHA4_MOUSE]                                    | 42.39 | 1   | 24 | 24 | 105 | 0.873 | 1.449 | 1.022 | 1.103 | 320.59  | 42.39 | 44 | 105 | 611  | 69.0  | 6.42  |
| Q8BIV3   | Ran-binding protein 6<br>OS=Mus musculus<br>GN=Ranbp6 PE=2 SV=3 -<br>[RNBP6_MOUSE]                                       | 18.73 | 2   | 14 | 16 | 37  | 0.664 | 0.850 | 0.860 | 1.103 | 89.59   | 18.73 | 25 | 37  | 1105 | 124.5 | 5.03  |
| Q3U487   | E3 ubiquitin-protein ligase<br>HECTD3 OS=Mus<br>musculus GN=Hectd3<br>PE=1 SV=2 -                                        | 20.79 | 2   | 14 | 15 | 35  | 0.875 | 0.832 | 0.890 | 1.103 | 100.37  | 20.79 | 26 | 35  | 861  | 97.3  | 5.47  |

|          |                                                                                                                                          |       |    |    |    |     |       |       |       |       |        |       |    |     |     |       |      |
|----------|------------------------------------------------------------------------------------------------------------------------------------------|-------|----|----|----|-----|-------|-------|-------|-------|--------|-------|----|-----|-----|-------|------|
| Q9Z2M7   | Phosphomannomutase 2<br>OS=Mus musculus<br>GN=Pmm2 PE=2 SV=1 -<br>[PMM2_MOUSE]                                                           | 50.41 | 1  | 9  | 11 | 41  | 0.923 | 1.137 | 1.101 | 1.103 | 111.35 | 50.41 | 17 | 41  | 242 | 27.6  | 6.42 |
| O35382   | Exocyst complex<br>component 4 OS=Mus<br>musculus GN=Exoc4 PE=1<br>SV=2 - [EXOC4_MOUSE]                                                  | 31.28 | 3  | 25 | 28 | 105 | 0.621 | 1.227 | 1.066 | 1.103 | 331.21 | 31.28 | 46 | 105 | 975 | 110.5 | 6.49 |
| Q91XE9   | Cyclic AMP-responsive<br>element-binding protein 3-<br>like protein 3 OS=Mus<br>musculus GN=Creb3l3<br>PE=2 SV=1 -<br>[CREB3_MOUSE]      | 2.09  | 1  | 1  | 1  | 1   | 1.601 | 1.477 | 1.187 | 1.103 | 3.03   | 2.09  | 1  | 1   | 479 | 52.1  | 5.07 |
| A1L314   | Macrophage-expressed<br>gene 1 protein OS=Mus<br>musculus GN=Mpeg1<br>PE=2 SV=1 -<br>[MPEG1_MOUSE]                                       | 3.51  | 2  | 1  | 1  | 2   | 2.144 | 1.508 | 1.080 | 1.103 | 0.00   | 3.51  | 1  | 2   | 713 | 78.3  | 5.92 |
| P70295   | Ancient ubiquitous protein<br>1 OS=Mus musculus<br>GN=Aup1 PE=2 SV=1 -<br>[AUP1_MOUSE]                                                   | 17.80 | 2  | 4  | 4  | 14  | 1.145 | 1.037 | 0.967 | 1.103 | 46.90  | 17.80 | 8  | 14  | 410 | 46.1  | 8.40 |
| Q8R0H9   | ADP-ribosylation factor-<br>binding protein GGA1<br>OS=Mus musculus<br>GN=Gga1 PE=1 SV=1 -<br>[GGA1_MOUSE]                               | 21.10 | 1  | 10 | 11 | 63  | 0.899 | 1.002 | 1.051 | 1.103 | 158.75 | 21.10 | 19 | 63  | 635 | 69.9  | 5.27 |
| Q04736   | Tyrosine-protein kinase<br>Yes OS=Mus musculus<br>GN=Yes1 PE=1 SV=3 -<br>[YES_MOUSE]                                                     | 36.78 | 15 | 9  | 19 | 96  | 0.659 | 0.626 | 0.831 | 1.104 | 233.22 | 36.78 | 34 | 96  | 541 | 60.6  | 6.64 |
| Q61474   | RNA-binding protein<br>Musashi homolog 1<br>OS=Mus musculus<br>GN=Msi1 PE=1 SV=1 -<br>[MSI1_MOUSE]                                       | 32.32 | 3  | 8  | 9  | 21  | 0.854 | 0.683 | 0.828 | 1.104 | 66.11  | 32.32 | 15 | 21  | 362 | 39.1  | 7.87 |
| Q91XU3   | Phosphatidylinositol 5-<br>phosphate 4-kinase type-2<br>gamma OS=Mus musculus<br>GN=Pip4k2c PE=2 SV=1 -<br>[PI42C_MOUSE]                 | 38.24 | 1  | 13 | 13 | 30  | 0.938 | 1.581 | 1.584 | 1.104 | 78.30  | 38.24 | 22 | 30  | 421 | 47.3  | 6.89 |
| Q03734   | Serine protease inhibitor<br>A3M OS=Mus musculus<br>GN=Serpin3m PE=1<br>SV=2 - [SPA3M_MOUSE]                                             | 25.12 | 1  | 1  | 8  | 40  | 2.810 | 1.005 | 1.311 | 1.104 | 132.32 | 25.12 | 11 | 40  | 418 | 47.0  | 6.10 |
| Q9D892   | Inosine triphosphate<br>pyrophosphatase OS=Mus<br>musculus GN=Itpa PE=1<br>SV=2 - [ITPA_MOUSE]                                           | 36.87 | 1  | 6  | 6  | 55  | 0.754 | 1.365 | 1.044 | 1.104 | 179.11 | 36.87 | 12 | 55  | 198 | 21.9  | 5.87 |
| Q8K366   | Exosc10 protein OS=Mus<br>musculus GN=Exosc10<br>PE=2 SV=1 -<br>[Q8K366_MOUSE]                                                           | 12.99 | 3  | 10 | 10 | 15  | 0.700 | 0.948 | 1.021 | 1.104 | 26.89  | 12.99 | 13 | 15  | 862 | 98.1  | 8.29 |
| Q6P069-2 | Isoform 2 of Sorcin<br>OS=Mus musculus GN=Sri<br>- [SORCN_MOUSE]                                                                         | 46.45 | 2  | 10 | 10 | 53  | 1.424 | 1.401 | 0.984 | 1.104 | 150.21 | 46.45 | 17 | 53  | 183 | 20.3  | 5.34 |
| Q05144   | Ras-related C3 botulinum<br>toxin substrate 2 OS=Mus<br>musculus GN=Rac2 PE=2<br>SV=1 - [RAC2_MOUSE]                                     | 28.65 | 7  | 2  | 6  | 40  | 0.820 | 1.074 | 0.934 | 1.104 | 103.88 | 28.65 | 10 | 40  | 192 | 21.4  | 7.61 |
| Q80V91   | Probable E3 ubiquitin-<br>protein ligase DTX3<br>OS=Mus musculus<br>GN=Dtx3 PE=2 SV=2 -<br>[DTX3_MOUSE]                                  | 15.85 | 3  | 3  | 3  | 35  | 0.759 | 0.836 | 1.052 | 1.104 | 72.47  | 15.85 | 6  | 35  | 347 | 38.0  | 8.73 |
| P63085   | Mitogen-activated protein<br>kinase 1 OS=Mus<br>musculus GN=Mapk1<br>PE=1 SV=3 -<br>[MAPK1_MOUSE]                                        | 56.98 | 10 | 13 | 22 | 249 | 0.753 | 2.513 | 1.211 | 1.104 | 637.23 | 56.98 | 44 | 249 | 358 | 41.2  | 6.98 |
| O08797   | Protein Serpinb9 OS=Mus<br>musculus GN=Serpinb9<br>PE=2 SV=1 -<br>[O08797_MOUSE]                                                         | 39.57 | 2  | 11 | 14 | 49  | 0.769 | 1.541 | 0.799 | 1.104 | 139.07 | 39.57 | 27 | 49  | 374 | 42.2  | 5.40 |
| P60904   | DnaI homolog subfamily C<br>member 5 OS=Mus<br>musculus GN=Dnajc5<br>PE=1 SV=1 -<br>[DNAJ5_MOUSE]                                        | 44.44 | 3  | 5  | 6  | 209 | 1.238 | 1.624 | 1.281 | 1.104 | 334.27 | 44.44 | 11 | 209 | 198 | 22.1  | 5.07 |
| Q921G7   | Electron transfer<br>flavoprotein-ubiquinone<br>oxidoreductase,<br>mitochondrial OS=Mus<br>musculus GN=Etrdh PE=1<br>SV=1 - [ETFD_MOUSE] | 42.53 | 2  | 22 | 22 | 119 | 1.029 | 1.172 | 1.007 | 1.104 | 368.77 | 42.53 | 39 | 119 | 616 | 68.0  | 7.58 |
| Q91ZU6-6 | Isoform 6 of Dystonin<br>OS=Mus musculus<br>GN=Dst - [DYST_MOUSE]                                                                        | 14.52 | 2  | 4  | 7  | 17  | 1.177 | 0.762 | 0.986 | 1.105 | 48.20  | 14.52 | 13 | 17  | 482 | 55.0  | 9.38 |
| O08967   | Cytohesin-3 OS=Mus<br>musculus GN=Cyth3 PE=1<br>SV=1 - [CYH3_MOUSE]                                                                      | 30.33 | 4  | 7  | 12 | 31  | 0.978 | 0.996 | 1.280 | 1.105 | 81.20  | 30.33 | 19 | 31  | 399 | 46.3  | 5.54 |
| Q61068   | Ubiquitin carboxyl-terminal<br>hydrolase DUB-1 OS=Mus<br>musculus GN=Dub1 PE=1<br>SV=1 - [UBPW_MOUSE]                                    | 2.28  | 1  | 1  | 1  | 1   | 1.640 | 1.017 | 0.989 | 1.105 | 2.48   | 2.28  | 1  | 1   | 526 | 59.0  | 7.74 |
| O35393   | Ephrin-B3 OS=Mus<br>musculus GN=Efnb3 PE=1<br>SV=1 - [EFNB3_MOUSE]                                                                       | 46.18 | 1  | 10 | 11 | 47  | 1.123 | 0.863 | 0.968 | 1.105 | 142.11 | 46.18 | 20 | 47  | 340 | 35.9  | 8.25 |
| Q9CX1    | Probable glutamate-tRNA<br>ligase, mitochondrial<br>OS=Mus musculus<br>GN=Ears2 PE=2 SV=1 -<br>[SYEM_MOUSE]                              | 16.44 | 1  | 7  | 7  | 18  | 0.627 | 1.862 | 1.439 | 1.105 | 53.91  | 16.44 | 12 | 18  | 523 | 58.3  | 8.75 |
| Q9J100   | Phospholipid scramblase 1<br>OS=Mus musculus<br>GN=Plscr1 PE=2 SV=1 -<br>[PLS1_MOUSE]                                                    | 4.27  | 1  | 2  | 2  | 3   | 1.321 | 1.162 | 0.992 | 1.105 | 6.26   | 4.27  | 3  | 3   | 328 | 35.9  | 5.06 |

|          |                                                                                                                                   |       |   |    |    |     |       |       |       |       |        |       |    |     |      |       |      |
|----------|-----------------------------------------------------------------------------------------------------------------------------------|-------|---|----|----|-----|-------|-------|-------|-------|--------|-------|----|-----|------|-------|------|
| Q8R1Q9   | Ribokinase OS=Mus musculus GN=Rbks PE=1 SV=1 - [RBSK_MOUSE]                                                                       | 7.74  | 1 | 2  | 2  | 5   | 3.147 | 0.742 | 1.189 | 1.105 | 15.03  | 7.74  | 3  | 5   | 323  | 34.1  | 5.47 |
| P35283   | Ras-related protein Rab-12 OS=Mus musculus GN=Rab12 PE=1 SV=3 - [RAB12_MOUSE]                                                     | 49.79 | 2 | 13 | 14 | 86  | 0.753 | 1.084 | 0.992 | 1.105 | 239.35 | 49.79 | 22 | 86  | 243  | 27.3  | 8.41 |
| Q91240   | Gbp6 protein OS=Mus musculus GN=Gbp7 PE=2 SV=2 - [Q91240_MOUSE]                                                                   | 10.19 | 3 | 3  | 7  | 13  | 1.279 | 1.330 | 0.920 | 1.105 | 35.31  | 10.19 | 11 | 13  | 638  | 72.7  | 6.33 |
| Q99LF7   | Protein Dcaf4 OS=Mus musculus GN=Dcaf4 PE=2 SV=1 - [Q99LF7_MOUSE]                                                                 | 2.12  | 1 | 1  | 1  | 2   | 1.515 | 1.503 | 0.789 | 1.105 | 0.00   | 2.12  | 1  | 2   | 519  | 58.1  | 8.37 |
| G3XA00   | Glutamate receptor, metabotropic 4 OS=Mus musculus GN=Gm4 PE=3 SV=1 - [G3XA00_MOUSE]                                              | 16.78 | 5 | 11 | 13 | 40  | 0.594 | 0.508 | 1.193 | 1.105 | 123.42 | 16.78 | 23 | 40  | 912  | 101.7 | 8.85 |
| Q9WV56   | Growth/differentiation factor 2 OS=Mus musculus GN=Gdf2 PE=2 SV=2 - [GDF2_MOUSE]                                                  | 3.04  | 1 | 1  | 1  | 1   | 1.732 | 1.349 | 1.151 | 1.105 | 2.25   | 3.04  | 1  | 1   | 428  | 47.7  | 5.44 |
| Q8K0B2-3 | Isoform 3 of Probable lysosomal cobalamin transporter OS=Mus musculus GN=Lmbrd1 - [LMBD1_MOUSE]                                   | 3.85  | 3 | 1  | 1  | 11  | 0.892 | 0.558 | 1.090 | 1.105 | 49.25  | 3.85  | 2  | 11  | 467  | 53.4  | 7.80 |
| Q921Q3-2 | Isoform 2 of Chitobiosyl(diphosphodolichol beta-mannosyltransferase OS=Mus musculus GN=Alg1 - [ALG1_MOUSE]                        | 17.54 | 2 | 6  | 6  | 10  | 0.566 | 0.945 | 0.921 | 1.106 | 28.38  | 17.54 | 10 | 10  | 456  | 51.4  | 8.21 |
| Q9WTK5   | Nuclear factor NF-kappa-B p100 subunit OS=Mus musculus GN=Nfkb2 PE=1 SV=1 - [NFKB2_MOUSE]                                         | 3.56  | 1 | 2  | 2  | 4   | 3.757 | 1.674 | 1.592 | 1.106 | 3.69   | 3.56  | 2  | 4   | 899  | 96.8  | 6.37 |
| Q8C3X2   | Coiled-coil domain-containing protein 90B, mitochondrial OS=Mus musculus GN=Cdc90b PE=2 SV=1 - [CDC90_MOUSE]                      | 30.86 | 2 | 7  | 9  | 26  | 0.904 | 1.829 | 0.946 | 1.106 | 83.27  | 30.86 | 14 | 26  | 256  | 29.6  | 8.53 |
| Q6R163   | Constitutive coactivator of peroxisome proliferator-activated receptor gamma OS=Mus musculus GN=Fam120b PE=1 SV=1 - [F120B_MOUSE] | 12.34 | 2 | 8  | 8  | 27  | 0.737 | 1.051 | 0.919 | 1.106 | 52.02  | 12.34 | 12 | 27  | 786  | 89.3  | 6.52 |
| Q9Z127   | Large neutral amino acids transporter small subunit 1 OS=Mus musculus GN=Slc7a5 PE=1 SV=2 - [LAT1_MOUSE]                          | 2.54  | 1 | 1  | 1  | 2   | 1.524 | 1.212 | 1.441 | 1.106 | 8.22   | 2.54  | 1  | 2   | 512  | 55.8  | 7.90 |
| O88845   | A-kinase anchor protein 10, mitochondrial OS=Mus musculus GN=Akap10 PE=1 SV=3 [AKA10_MOUSE]                                       | 35.20 | 3 | 16 | 16 | 47  | 0.763 | 0.918 | 1.144 | 1.106 | 128.37 | 35.20 | 26 | 47  | 662  | 73.6  | 6.79 |
| P97346   | Nucleoredoxin OS=Mus musculus GN=Nxn PE=1 SV=1 - [NXN_MOUSE]                                                                      | 20.00 | 2 | 6  | 6  | 13  | 1.081 | 1.284 | 0.821 | 1.106 | 39.13  | 20.00 | 12 | 13  | 435  | 48.3  | 4.93 |
| Q8BHN1   | Gamma-taxilin OS=Mus musculus GN=Txing PE=1 SV=1 - [TXLNG_MOUSE]                                                                  | 12.79 | 6 | 2  | 6  | 9   | 1.417 | 1.728 | 1.252 | 1.106 | 19.61  | 12.79 | 7  | 9   | 524  | 60.3  | 8.12 |
| Q5SUAS   | Unconventional myosin-Ig OS=Mus musculus GN=Myo1g PE=2 SV=1 - [MYO1G_MOUSE]                                                       | 6.05  | 1 | 4  | 5  | 6   | 1.774 | 1.099 | 1.004 | 1.106 | 15.69  | 6.05  | 6  | 6   | 1024 | 117.2 | 8.59 |
| Q3T5E0   | IQ motif and SEC7 domain-containing protein 3 OS=Mus musculus GN=Iqsec3 PE=1 SV=1 - [IQEC3_MOUSE]                                 | 25.27 | 2 | 24 | 29 | 115 | 1.109 | 0.814 | 0.978 | 1.106 | 328.80 | 25.27 | 50 | 115 | 1195 | 129.0 | 6.19 |
| Q9CYH2   | Redox-regulatory protein FAM213A OS=Mus musculus GN=Fam213a PE=1 SV=2 -                                                           | 42.66 | 8 | 12 | 12 | 51  | 0.765 | 1.004 | 0.884 | 1.106 | 122.96 | 42.66 | 20 | 51  | 218  | 24.4  | 9.17 |
| Q0MW30   | E3 ubiquitin-protein ligase NEURL1B OS=Mus musculus GN=Neurl1b PE=1 SV=1 - [NEU1B_MOUSE]                                          | 5.68  | 1 | 2  | 2  | 3   | 0.860 | 0.782 | 0.948 | 1.106 | 2.56   | 5.68  | 2  | 3   | 546  | 58.5  | 8.37 |
| Q9JJ61   | Polypeptide N-acetylgalactosaminyltransferase 16 OS=Mus musculus GN=Galnt16 PE=2 SV=2 -                                           | 22.58 | 1 | 9  | 10 | 25  | 0.799 | 1.022 | 0.840 | 1.106 | 78.29  | 22.58 | 15 | 25  | 558  | 62.8  | 8.92 |
| G3UWF6   | MCG1027453 OS=Mus musculus GN=2010015L04Rik PE=4 SV=1 - [G3UWF6_MOUSE]                                                            | 25.58 | 3 | 3  | 4  | 6   | 2.802 | 1.705 | 1.114 | 1.106 | 13.56  | 25.58 | 6  | 6   | 129  | 14.9  | 4.86 |
| Q8BU33   | Acetolactate synthase-like protein OS=Mus musculus GN=Ilvbl PE=2 SV=1 - [ILVBL_MOUSE]                                             | 16.93 | 3 | 9  | 9  | 21  | 1.023 | 0.689 | 0.873 | 1.106 | 54.29  | 16.93 | 16 | 21  | 632  | 68.1  | 8.69 |
| O55013   | Trafficking protein particle complex subunit 3 OS=Mus musculus GN=Trappc3 PE=1 SV=1 - [TPPC3_MOUSE]                               | 39.44 | 1 | 6  | 6  | 25  | 0.805 | 1.052 | 0.941 | 1.106 | 60.90  | 39.44 | 10 | 25  | 180  | 20.3  | 4.96 |

|          |                                                                                                            |       |   |    |    |     |       |       |       |       |        |       |    |     |      |       |      |
|----------|------------------------------------------------------------------------------------------------------------|-------|---|----|----|-----|-------|-------|-------|-------|--------|-------|----|-----|------|-------|------|
| Q5Y5T1-2 | Isoform 2 of Probable palmitoyltransferase ZDHH20 OS=Mus musculus GN=Zdhhc20 - [ZDH20_MOUSE]               | 13.86 | 2 | 2  | 4  | 15  | 0.668 | 0.629 | 0.759 | 1.106 | 36.91  | 13.86 | 7  | 15  | 368  | 42.5  | 8.00 |
| Q9D7A8   | Armadillo repeat-containing protein 1 OS=Mus musculus GN=Armc1 PE=2 SV=1 -                                 | 49.29 | 1 | 13 | 13 | 44  | 0.763 | 1.020 | 1.093 | 1.106 | 113.07 | 49.29 | 23 | 44  | 282  | 31.2  | 5.57 |
| Q8R0F8   | Acylpyruvase FAHD1, mitochondrial OS=Mus musculus GN=Fahd1 PE=1 SV=2 - [FAHD1_MOUSE]                       | 70.48 | 1 | 13 | 13 | 35  | 1.889 | 0.972 | 1.188 | 1.107 | 109.12 | 70.48 | 20 | 35  | 227  | 25.2  | 7.69 |
| F6UIK0   | Protein Dusp16 (Fragment) OS=Mus musculus GN=Dusp16 PE=2 SV=1 -                                            | 2.58  | 1 | 1  | 1  | 3   | 0.774 | 1.168 | 1.053 | 1.107 | 7.48   | 2.58  | 1  | 3   | 271  | 30.3  | 7.28 |
| D3Z0F5   | COP9 signalosome complex subunit 6 OS=Mus musculus GN=Cops6 PE=2 SV=1 -                                    | 70.71 | 3 | 14 | 14 | 58  | 0.581 | 0.956 | 0.943 | 1.107 | 178.19 | 70.71 | 25 | 58  | 297  | 33.6  | 6.00 |
| Q8BHC1   | Ras-related protein Rab-39B OS=Mus musculus GN=Rab39b PE=2 SV=1 - [RB39B_MOUSE]                            | 69.95 | 2 | 15 | 17 | 98  | 0.773 | 1.022 | 0.998 | 1.107 | 269.04 | 69.95 | 30 | 98  | 213  | 24.6  | 7.83 |
| A2AMH5   | Choline transporter-like protein 1 OS=Mus musculus GN=Slc44a1 PE=2 SV=1 -                                  | 17.07 | 4 | 1  | 11 | 41  | 0.639 | 0.442 | 1.111 | 1.107 | 128.11 | 17.07 | 19 | 41  | 656  | 73.0  | 8.60 |
| Q924T7-2 | Isoform 2 of E3 ubiquitin-protein ligase RNF31 OS=Mus musculus GN=Rnf31 -                                  | 17.41 | 4 | 15 | 15 | 44  | 1.082 | 0.983 | 1.051 | 1.107 | 137.18 | 17.41 | 27 | 44  | 1057 | 118.1 | 6.49 |
| Q8BGV8   | Mitochondrial dynamic protein MIDS1 OS=Mus musculus GN=Smcr7l PE=1 SV=1 - [MIDS1_MOUSE]                    | 14.69 | 3 | 7  | 7  | 18  | 1.105 | 1.026 | 1.070 | 1.107 | 38.30  | 14.69 | 12 | 18  | 463  | 51.2  | 7.88 |
| Q9CQ4    | Gen-associated protein 2 OS=Mus musculus GN=Gemin2 PE=2 SV=1 - [GEM2_MOUSE]                                | 7.06  | 1 | 2  | 2  | 8   | 0.549 | 1.496 | 1.013 | 1.107 | 16.09  | 7.06  | 3  | 8   | 269  | 30.4  | 5.53 |
| Q8R1Y2   | Uncharacterized protein C16orf45 homolog OS=Mus musculus PE=2 SV=1 - [CP045_MOUSE]                         | 23.15 | 3 | 6  | 6  | 18  | 0.891 | 1.272 | 1.075 | 1.107 | 38.89  | 23.15 | 11 | 18  | 203  | 23.5  | 5.63 |
| Q9CR26   | Vacuolar protein sorting-associated protein VTA1 homolog OS=Mus musculus GN=Vta1 PE=1 SV=1 - [VTA1_MOUSE]  | 34.30 | 2 | 10 | 10 | 37  | 0.935 | 1.048 | 1.044 | 1.107 | 104.43 | 34.30 | 17 | 37  | 309  | 33.9  | 6.13 |
| Q6NXX7   | Inactive dipeptidyl peptidase 10 OS=Mus musculus GN=Dpp10 PE=2 SV=1 -                                      | 48.31 | 3 | 34 | 36 | 133 | 0.625 | 1.386 | 1.140 | 1.107 | 363.34 | 48.31 | 60 | 133 | 797  | 90.8  | 6.48 |
| M0QWJ9   | Protein Tmem178b OS=Mus musculus GN=Tmem178b PE=4 SV=1 - [M0QWJ9_MOUSE]                                    | 18.60 | 1 | 3  | 3  | 6   | 0.522 | 1.905 | 1.113 | 1.107 | 13.79  | 18.60 | 6  | 6   | 172  | 19.4  | 9.77 |
| Q9QY01   | Serine/threonine-protein kinase ULK2 OS=Mus musculus GN=Ulk2 PE=1 SV=1 - [ULK2_MOUSE]                      | 11.96 | 1 | 6  | 6  | 12  | 0.704 | 0.782 | 1.119 | 1.107 | 34.74  | 11.96 | 9  | 12  | 1037 | 112.8 | 8.53 |
| A2AEV2   | WD repeat domain phosphoinositide-interacting protein 4 OS=Mus musculus GN=Wdr45 PE=2 SV=1 - [WDR45_MOUSE] | 25.78 | 7 | 6  | 6  | 15  | 1.465 | 0.981 | 1.018 | 1.107 | 45.60  | 25.78 | 11 | 15  | 256  | 28.5  | 7.65 |
| Q9D4Z8   | Golgin subfamily A member 7B OS=Mus musculus GN=GOLGA7B PE=2 SV=1 -                                        | 22.16 | 1 | 4  | 4  | 15  | 1.161 | 1.155 | 0.927 | 1.107 | 34.66  | 22.16 | 6  | 15  | 167  | 18.3  | 6.01 |
| Q8K297   | Procollagen galactosyltransferase 1 OS=Mus musculus GN=Colgalt1 PE=1 SV=2 -                                | 3.24  | 1 | 2  | 2  | 3   | 0.827 | 1.520 | 0.829 | 1.107 | 3.16   | 3.24  | 3  | 3   | 617  | 71.0  | 7.28 |
| Q99JY0   | Trifunctional enzyme subunit beta, mitochondrial OS=Mus musculus GN=Hadhb PE=1 SV=1 - [HADHB_MOUSE]        | 47.79 | 2 | 18 | 19 | 121 | 0.830 | 0.874 | 0.856 | 1.107 | 301.07 | 47.79 | 36 | 121 | 475  | 51.4  | 9.38 |
| Q61035   | Histidine-tRNA ligase, cytoplasmic OS=Mus musculus GN=Hars PE=2 SV=2 - [SYHC_MOUSE]                        | 45.78 | 1 | 19 | 22 | 88  | 1.046 | 1.014 | 0.871 | 1.107 | 240.65 | 45.78 | 37 | 88  | 509  | 57.4  | 6.00 |
| Q0QWG9-2 | Isoform 2 of Delphinin OS=Mus musculus GN=Grd2ip - [GRD2I_MOUSE]                                           | 8.01  | 3 | 6  | 6  | 13  | 1.109 | 0.630 | 1.113 | 1.107 | 16.12  | 8.01  | 8  | 13  | 1024 | 112.5 | 6.89 |
| Q8VDP3-2 | Isoform 2 of Protein-methionine sulfoxide oxidase MICAL1 OS=Mus musculus GN=Mical1 - [MICAL1_MOUSE]        | 17.95 | 4 | 15 | 15 | 44  | 1.248 | 1.256 | 1.128 | 1.108 | 128.33 | 17.95 | 26 | 44  | 975  | 108.6 | 5.57 |
| E9QPY6   | DNA mismatch repair protein Msh3 OS=Mus musculus GN=Msh3 PE=2 SV=1 - [E9QPY6_MOUSE]                        | 5.84  | 2 | 3  | 3  | 4   | 1.404 | 1.136 | 1.140 | 1.108 | 9.32   | 5.84  | 4  | 4   | 1095 | 123.3 | 7.83 |
| Q6Z179   | Semaphorin-4B OS=Mus musculus GN=Sema4b PE=1 SV=2 - [SEM4B_MOUSE]                                          | 10.57 | 2 | 8  | 9  | 21  | 0.831 | 1.181 | 0.988 | 1.108 | 45.58  | 10.57 | 15 | 21  | 823  | 91.3  | 8.15 |
| F6WKU5   | Multidrug resistance-associated protein 9 (Fragment) OS=Mus musculus GN=Abcc12 PE=4 SV=1 - [ABCC12_MOUSE]  | 5.34  | 2 | 2  | 2  | 6   | 1.930 | 1.206 | 0.982 | 1.108 | 2.47   | 5.34  | 2  | 6   | 524  | 58.7  | 6.79 |

|          |                                                                                                            |       |    |    |    |     |       |       |       |       |        |       |    |     |      |       |      |
|----------|------------------------------------------------------------------------------------------------------------|-------|----|----|----|-----|-------|-------|-------|-------|--------|-------|----|-----|------|-------|------|
| Q11011   | Puromycin-sensitive aminopeptidase OS=Mus musculus GN=Npepps PE=1 SV=2 - [PSA_MOUSE]                       | 57.39 | 7  | 44 | 44 | 301 | 0.642 | 1.160 | 1.004 | 1.108 | 826.73 | 57.39 | 81 | 301 | 920  | 103.3 | 5.90 |
| Q91V24   | ATP-binding cassette sub-family A member 7 OS=Mus musculus GN=Abca7 PE=1 SV=1 - [ABCA7_MOUSE]              | 8.99  | 2  | 13 | 13 | 32  | 0.714 | 0.786 | 1.045 | 1.108 | 97.15  | 8.99  | 20 | 32  | 2159 | 236.7 | 7.28 |
| Q9JLC8-3 | Isoform 3 of Sacs1 OS=Mus musculus GN=Sacs - [SACS_MOUSE]                                                  | 13.10 | 6  | 51 | 52 | 96  | 0.999 | 0.735 | 1.037 | 1.108 | 263.98 | 13.10 | 77 | 96  | 4579 | 519.9 | 7.09 |
| Q05860-3 | Isoform 3 of Formin-1 OS=Mus musculus GN=Fmn1 - [FMN1_MOUSE]                                               | 1.61  | 6  | 1  | 3  | 4   | 1.271 | 1.321 | 1.142 | 1.108 | 4.04   | 1.61  | 4  | 4   | 1368 | 152.5 | 8.82 |
| Q8K211   | Protein farnesyltransferase subunit beta OS=Mus musculus GN=Fntb PE=1 SV=1 - [FNTB_MOUSE]                  | 17.62 | 2  | 5  | 6  | 15  | 1.132 | 0.866 | 0.896 | 1.108 | 36.96  | 17.62 | 10 | 15  | 437  | 48.8  | 5.80 |
| E9Q5C3   | Fibroblast growth factor receptor (Fragment) OS=Mus musculus GN=Fgfr2 PE=2 SV=1 - [E9Q5C3_MOUSE]           | 8.48  | 34 | 2  | 5  | 27  | 2.120 | 1.458 | 1.233 | 1.108 | 54.73  | 8.48  | 7  | 27  | 696  | 78.3  | 8.10 |
| Q61334   | B-cell receptor-associated protein 29 OS=Mus musculus GN=Bcap29 PE=1 SV=1 - [Bcap29_MOUSE]                 | 10.42 | 1  | 4  | 4  | 19  | 0.490 | 0.895 | 0.915 | 1.108 | 42.75  | 10.42 | 8  | 19  | 240  | 27.9  | 9.72 |
| P52795   | Ephrin-B1 OS=Mus musculus GN=Efnb1 PE=1 SV=1 - [EFNB1_MOUSE]                                               | 34.20 | 1  | 7  | 9  | 27  | 0.696 | 2.685 | 1.130 | 1.108 | 75.65  | 34.20 | 16 | 27  | 345  | 37.8  | 9.03 |
| Q8K070   | Sterile alpha motif domain-containing protein 14 OS=Mus musculus GN=Samd14 PE=1 SV=1 - [SAM14_MOUSE]       | 26.38 | 2  | 8  | 8  | 14  | 0.907 | 0.716 | 1.101 | 1.108 | 39.55  | 26.38 | 12 | 14  | 417  | 45.1  | 9.47 |
| F8WH72   | Schlafen family member 5 (Fragment) OS=Mus musculus GN=Sfn5 PE=2 SV=1 - [F8WH72_MOUSE]                     | 1.85  | 2  | 1  | 1  | 1   | 0.830 | 0.356 | 0.941 | 1.109 | 1.91   | 1.85  | 1  | 1   | 378  | 43.0  | 6.04 |
| Q8C6B0   | MCG20149, isoform CRA_a OS=Mus musculus GN=Mett7a1 PE=2 SV=1 - [Q8C6B0_MOUSE]                              | 26.23 | 5  | 1  | 6  | 10  | 0.913 | 1.539 | 1.085 | 1.109 | 22.48  | 26.23 | 8  | 10  | 244  | 28.1  | 8.31 |
| Q61578   | NADPH:adrenodoxin oxidoreductase, mitochondrial OS=Mus musculus GN=Fdxr PE=2 SV=1 - [ADRO_MOUSE]           | 44.94 | 1  | 15 | 15 | 50  | 0.707 | 0.874 | 0.839 | 1.109 | 146.64 | 44.94 | 24 | 50  | 494  | 54.2  | 8.66 |
| P20108   | Thioredoxin-dependent peroxide reductase, mitochondrial OS=Mus musculus GN=Prdx3 PE=1 SV=1 - [PRDX3_MOUSE] | 49.42 | 1  | 10 | 10 | 225 | 2.044 | 1.172 | 0.916 | 1.109 | 700.26 | 49.42 | 19 | 225 | 257  | 28.1  | 7.58 |
| A2ADY9   | Protein DDI1 homolog 2 OS=Mus musculus GN=Did2 PE=1 SV=1 - [DDI2_MOUSE]                                    | 44.11 | 2  | 13 | 13 | 58  | 1.423 | 1.488 | 1.110 | 1.109 | 178.33 | 44.11 | 24 | 58  | 399  | 44.6  | 5.05 |
| O09126   | Semaphorin-4D OS=Mus musculus GN=Sema4d PE=1 SV=2 - [SEMD_MOUSE]                                           | 20.56 | 1  | 15 | 15 | 35  | 0.867 | 1.093 | 0.948 | 1.109 | 102.32 | 20.56 | 23 | 35  | 861  | 95.6  | 7.81 |
| E9Q175   | Unconventional myosin-VI OS=Mus musculus GN=Myo6 PE=2 SV=1 - [E9Q175_MOUSE]                                | 44.77 | 2  | 12 | 55 | 172 | 0.890 | 0.851 | 1.092 | 1.109 | 487.44 | 44.77 | 92 | 172 | 1253 | 144.7 | 8.51 |
| Q5NCF2   | Trafficking protein particle complex subunit 1 OS=Mus musculus GN=Trappc1 PE=1 SV=1 - [TPPC1_MOUSE]        | 11.03 | 3  | 2  | 2  | 7   | 0.641 | 0.838 | 0.830 | 1.109 | 16.64  | 11.03 | 3  | 7   | 145  | 16.9  | 9.16 |
| Q8C0L0   | Thioredoxin-related transmembrane protein 4 OS=Mus musculus GN=Tmx4 PE=1 SV=2 - [TMX4_MOUSE]               | 17.31 | 3  | 6  | 6  | 35  | 0.715 | 1.141 | 1.002 | 1.109 | 108.66 | 17.31 | 11 | 35  | 335  | 37.1  | 4.37 |
| Q922R1   | UPF0183 protein C16orf70 homolog OS=Mus musculus PE=2 SV=2 - [CP070_MOUSE]                                 | 16.59 | 4  | 6  | 6  | 12  | 0.536 | 1.112 | 1.080 | 1.109 | 46.64  | 16.59 | 8  | 12  | 422  | 47.4  | 7.74 |
| Q9QUI0   | Transforming protein RhoA OS=Mus musculus GN=Rhoa PE=1 SV=1 - [RHOA_MOUSE]                                 | 65.28 | 3  | 2  | 9  | 142 | 0.692 | 0.804 | 0.854 | 1.109 | 424.66 | 65.28 | 18 | 142 | 193  | 21.8  | 6.10 |
| Q37ZX3   | Solute carrier family 25 member 33 OS=Mus musculus GN=Slc25a33 PE=2 SV=1 - [Slc25a33_MOUSE]                | 5.00  | 1  | 2  | 2  | 4   | 0.848 | 0.799 | 0.687 | 1.109 | 5.52   | 5.00  | 3  | 4   | 320  | 35.0  | 9.67 |
| Q99LB4   | Capping protein (Actin filament), gelsolin-like OS=Mus musculus GN=Capp PE=1 SV=1 - [Q99LB4_MOUSE]         | 24.93 | 8  | 8  | 8  | 24  | 1.211 | 1.259 | 0.693 | 1.110 | 75.83  | 24.93 | 12 | 24  | 349  | 38.7  | 6.95 |
| D3YU06   | Abhydrolase domain-containing protein 3 OS=Mus musculus GN=Abhd3 PE=2 SV=1 - [D3YU06_MOUSE]                | 14.43 | 5  | 5  | 5  | 14  | 1.102 | 0.932 | 0.924 | 1.110 | 32.12  | 14.43 | 7  | 14  | 402  | 45.2  | 7.30 |
| Q8BHH2   | Ras-related protein Rab-9B OS=Mus musculus GN=Rab9b PE=2 SV=1 - [RAB9B_MOUSE]                              | 46.77 | 1  | 6  | 8  | 36  | 0.899 | 0.822 | 0.626 | 1.110 | 125.70 | 46.77 | 13 | 36  | 201  | 22.7  | 4.93 |

|          |                                                                                                          |       |   |    |    |     |       |       |       |       |        |       |    |     |      |       |       |
|----------|----------------------------------------------------------------------------------------------------------|-------|---|----|----|-----|-------|-------|-------|-------|--------|-------|----|-----|------|-------|-------|
| Q60805   | Tyrosine-protein kinase Mer OS=Mus musculus GN=Mertk PE=1 SV=1 - [MERTK_MOUSE]                           | 11.37 | 1 | 10 | 11 | 27  | 0.965 | 1.506 | 1.390 | 1.110 | 65.60  | 11.37 | 18 | 27  | 994  | 110.1 | 5.50  |
| P59644   | Phosphatidylinositol 4,5-bisphosphate 5-phosphatase A OS=Mus musculus GN=Inpp5 PE=1 SV=2 - [INPP5_MOUSE] | 27.62 | 2 | 18 | 18 | 56  | 1.065 | 0.819 | 1.310 | 1.110 | 141.55 | 27.62 | 28 | 56  | 1003 | 107.5 | 9.36  |
| Q921E2   | Ras-related protein Rab-31 OS=Mus musculus GN=Rab31 PE=1 SV=1 - [RAB31_MOUSE]                            | 69.59 | 3 | 9  | 11 | 47  | 0.905 | 0.646 | 0.962 | 1.110 | 159.17 | 69.59 | 19 | 47  | 194  | 21.3  | 7.40  |
| Q8BH66   | Atlastin-1 OS=Mus musculus GN=At11 PE=1 SV=1 - [ATLA1_MOUSE]                                             | 42.47 | 1 | 21 | 23 | 152 | 0.601 | 1.118 | 1.096 | 1.110 | 446.61 | 42.47 | 45 | 152 | 558  | 63.3  | 6.49  |
| Q9WVJ3-2 | Isoform 2 of Carboxypeptidase Q OS=Mus musculus GN=Cpq - [CBPQ_MOUSE]                                    | 13.97 | 2 | 5  | 5  | 14  | 1.988 | 1.463 | 1.049 | 1.110 | 40.67  | 13.97 | 8  | 14  | 458  | 50.5  | 6.40  |
| Q9QWT9-3 | Isoform 3 of Kinesin-like protein KIFC1 OS=Mus musculus GN=Kifc1 - [KIFC1_MOUSE]                         | 1.15  | 4 | 1  | 1  | 3   | 0.955 | 1.117 | 1.050 | 1.110 | 8.24   | 1.15  | 1  | 3   | 611  | 67.1  | 8.59  |
| E9P2Y0   | Dual-specificity protein phosphatase isoform MDSP OS=Mus musculus GN=Dusp13 PE=2 SV=1 - [E9P2Y0_MOUSE]   | 7.38  | 2 | 1  | 1  | 1   | 1.118 | 1.011 | 1.100 | 1.110 | 0.00   | 7.38  | 1  | 1   | 149  | 16.3  | 9.13  |
| AZACC6   | Ral GTPase-activating protein subunit beta OS=Mus musculus GN=Ralgapb PE=2 SV=1 - [AZACC6_MOUSE]         | 23.55 | 6 | 22 | 22 | 95  | 0.951 | 1.109 | 1.043 | 1.110 | 289.25 | 23.55 | 40 | 95  | 1495 | 166.5 | 6.74  |
| Q8BG40   | Katanin p80 WD40 repeat-containing subunit B1 OS=Mus musculus GN=Katnb1 PE=1 SV=1 - [KTNB1_MOUSE]        | 29.03 | 1 | 14 | 14 | 51  | 0.926 | 1.029 | 1.076 | 1.110 | 156.21 | 29.03 | 21 | 51  | 658  | 72.6  | 7.27  |
| Q9D1H8   | 39S ribosomal protein L53, mitochondrial OS=Mus musculus GN=Mrp153 PE=2 SV=1 - [RMS3_MOUSE]              | 35.59 | 1 | 3  | 3  | 11  | 0.883 | 0.814 | 0.951 | 1.110 | 38.19  | 35.59 | 6  | 11  | 118  | 12.7  | 9.52  |
| P09225   | Lymphotoxin-alpha OS=Mus musculus GN=Lta PE=2 SV=1 - [TNFB_MOUSE]                                        | 12.87 | 1 | 2  | 3  | 8   | 1.148 | 1.109 | 0.909 | 1.110 | 13.66  | 12.87 | 4  | 8   | 202  | 22.0  | 10.14 |
| Q5SUC9   | Protein SCO1 homolog, mitochondrial OS=Mus musculus GN=Sco1 PE=2 SV=1 - [SCO1_MOUSE]                     | 17.25 | 2 | 6  | 6  | 12  | 0.881 | 1.096 | 1.076 | 1.111 | 32.85  | 17.25 | 11 | 12  | 284  | 31.6  | 8.47  |
| Q8CITO   | Corticotiberin OS=Mus musculus GN=Crh PE=2 SV=1 - [CRF_MOUSE]                                            | 24.60 | 1 | 4  | 4  | 14  | 1.234 | 1.209 | 0.968 | 1.111 | 27.16  | 24.60 | 7  | 14  | 187  | 20.8  | 10.52 |
| G3X9B1   | HEAT repeat containing 1 OS=Mus musculus GN=Heatr1 PE=4 SV=1 - [G3X9B1_MOUSE]                            | 2.24  | 1 | 3  | 5  | 11  | 1.020 | 0.904 | 0.831 | 1.111 | 18.04  | 2.24  | 7  | 11  | 2143 | 241.9 | 6.98  |
| D3Z4X7   | ADP-ribosylation factor-like protein 10 (Fragment) OS=Mus musculus GN=Arl10 PE=2 SV=1 - [D3Z4X7_MOUSE]   | 32.67 | 3 | 4  | 4  | 12  | 0.791 | 0.868 | 0.661 | 1.111 | 39.19  | 32.67 | 8  | 12  | 202  | 22.8  | 4.77  |
| Q92M07   | Synaptotagmin-17 OS=Mus musculus GN=Sytl7 PE=2 SV=1 - [SYT17_MOUSE]                                      | 17.66 | 1 | 8  | 8  | 12  | 0.509 | 2.479 | 1.446 | 1.111 | 29.99  | 17.66 | 9  | 12  | 470  | 53.3  | 7.15  |
| P49718   | DNA replication licensing factor MCM5 OS=Mus musculus GN=Mcm5 PE=2 SV=1 - [MCM5_MOUSE]                   | 8.05  | 2 | 2  | 2  | 2   | 1.759 | 1.666 | 1.655 | 1.111 | 5.71   | 8.05  | 2  | 2   | 733  | 82.3  | 8.43  |
| Q8BLI4   | Dermatan-sulfate epimerase OS=Mus musculus GN=Dse PE=2 SV=1 - [DSE_MOUSE]                                | 1.46  | 1 | 2  | 2  | 2   | 3.585 | 1.742 | 0.876 | 1.111 | 5.06   | 1.46  | 2  | 2   | 958  | 109.7 | 7.25  |
| Q91WQ3   | Tyrosine-tRNA ligase, cytoplasmic OS=Mus musculus GN=Yars PE=2 SV=3 - [SYYC_MOUSE]                       | 70.45 | 3 | 39 | 40 | 171 | 1.012 | 0.945 | 0.983 | 1.111 | 474.14 | 70.45 | 70 | 171 | 528  | 59.1  | 7.01  |
| B1ASP2   | Tyrosine-protein kinase OS=Mus musculus GN=Jak1 PE=3 SV=1 - [BIASP2_MOUSE]                               | 15.26 | 3 | 13 | 15 | 29  | 0.845 | 0.925 | 0.939 | 1.111 | 81.65  | 15.26 | 28 | 29  | 1153 | 133.3 | 7.53  |
| E9Q2V5   | Protein BC037034 OS=Mus musculus GN=BC037034 PE=4 SV=1 [E9Q2V5_MOUSE]                                    | 14.31 | 2 | 6  | 6  | 19  | 0.669 | 1.007 | 0.985 | 1.111 | 47.47  | 14.31 | 11 | 19  | 580  | 62.7  | 8.68  |
| Q9QUJ7-2 | Isoform Short of Long-chain-fatty-acid-CoA ligase 4 OS=Mus musculus GN=Acsl4 - [ACSL4_MOUSE]             | 23.73 | 2 | 12 | 14 | 33  | 0.889 | 1.048 | 1.002 | 1.111 | 86.05  | 23.73 | 22 | 33  | 670  | 74.3  | 8.00  |
| Q3UYV8   | Dynein assembly factor 3, axonemal OS=Mus musculus GN=Dnaaf3 PE=2 SV=1 - [DAAF3_MOUSE]                   | 1.88  | 1 | 1  | 1  | 2   | 0.886 | 1.055 | 1.297 | 1.111 | 5.85   | 1.88  | 1  | 2   | 586  | 64.6  | 6.11  |
| Q8BSB7   | Tissue factor pathway inhibitor OS=Mus musculus GN=TFpi PE=2 SV=1 - [Q8BSB7_MOUSE]                       | 3.40  | 6 | 1  | 1  | 1   | 0.725 | 1.673 | 1.350 | 1.111 | 2.04   | 3.40  | 1  | 1   | 235  | 26.8  | 5.71  |
| Q99KJ0   | UBX domain-containing protein 2A OS=Mus musculus GN=Ubxn2a PE=2 SV=1 -                                   | 26.74 | 2 | 5  | 5  | 8   | 1.567 | 1.188 | 1.066 | 1.111 | 24.18  | 26.74 | 8  | 8   | 258  | 29.2  | 5.80  |

|          |                                                                                                                                  |       |    |    |    |     |       |       |       |       |        |       |    |     |      |       |      |
|----------|----------------------------------------------------------------------------------------------------------------------------------|-------|----|----|----|-----|-------|-------|-------|-------|--------|-------|----|-----|------|-------|------|
| Q8BHD8   | Protein-L-isoaspartate O-methyltransferase domain-containing protein 2<br>OS=Mus musculus<br>GN=Pcmdt2 PE=2 SV=1 - [PCMD2_MOUSE] | 15.04 | 3  | 5  | 6  | 8   | 1.381 | 1.003 | 1.125 | 1.111 | 17.57  | 15.04 | 7  | 8   | 359  | 40.7  | 6.46 |
| Q8CBF3   | Ephrin type-B receptor 1<br>OS=Mus musculus<br>GN=Ephb1 PE=1 SV=1 - [EPHB1_MOUSE]                                                | 18.29 | 4  | 7  | 14 | 32  | 0.672 | 0.382 | 0.902 | 1.111 | 82.39  | 18.29 | 24 | 32  | 984  | 109.8 | 6.40 |
| Q9CQX6   | MCG141091, isoform CRA_a OS=Mus musculus<br>GN=Gm16286 PE=2 SV=1 - [Q9CQX6_MOUSE]                                                | 36.82 | 5  | 4  | 8  | 22  | 1.025 | 0.673 | 0.963 | 1.111 | 60.09  | 36.82 | 13 | 22  | 220  | 24.8  | 6.23 |
| Q9CPY7   | Cytosol aminopeptidase<br>OS=Mus musculus<br>GN=Lap3 PE=1 SV=3 - [AMPL_MOUSE]                                                    | 71.87 | 2  | 29 | 29 | 188 | 1.744 | 0.888 | 1.017 | 1.111 | 558.50 | 71.87 | 53 | 188 | 519  | 56.1  | 7.72 |
| Q9WTP7   | GTP:AMP phosphotransferase AK3, mitochondrial OS=Mus musculus<br>GN=AK3 PE=1 SV=3 - [KAD3_MOUSE]                                 | 81.94 | 2  | 18 | 18 | 96  | 0.812 | 1.234 | 1.030 | 1.112 | 298.50 | 81.94 | 33 | 96  | 227  | 25.4  | 8.84 |
| Q8R2H9   | Phosphoethanolamine/phosphocholine phosphatase<br>OS=Mus musculus<br>GN=Phospho1 PE=2 SV=1 - [PHOP1_MOUSE]                       | 26.97 | 3  | 5  | 5  | 10  | 1.030 | 0.763 | 0.977 | 1.112 | 32.11  | 26.97 | 9  | 10  | 267  | 29.9  | 7.94 |
| Q80TQ2   | Ubiquitin carboxyl-terminal hydrolase CYLD OS=Mus musculus<br>GN=Cyld PE=1 SV=2 - [CYLD_MOUSE]                                   | 28.26 | 3  | 22 | 22 | 54  | 1.037 | 1.494 | 1.625 | 1.112 | 177.09 | 28.26 | 36 | 54  | 952  | 106.5 | 5.63 |
| Q8R404   | Protein QIL1 OS=Mus musculus<br>GN=Qil1 PE=2 SV=1 - [QIL1_MOUSE]                                                                 | 41.18 | 1  | 3  | 3  | 12  | 0.984 | 1.330 | 1.034 | 1.112 | 53.71  | 41.18 | 4  | 12  | 119  | 13.4  | 8.63 |
| B1AWN6   | Protein Scn2a1 OS=Mus musculus<br>GN=Scn2a1 PE=3 SV=1 - [B1AWN6_MOUSE]                                                           | 19.79 | 11 | 19 | 36 | 130 | 0.622 | 1.292 | 1.428 | 1.112 | 390.20 | 19.79 | 61 | 130 | 2006 | 227.8 | 5.67 |
| Q8V163   | MOB kinase activator 2<br>OS=Mus musculus<br>GN=Mob2 PE=2 SV=1 - [MOB2_MOUSE]                                                    | 11.49 | 2  | 3  | 3  | 12  | 0.750 | 1.007 | 0.953 | 1.112 | 31.85  | 11.49 | 6  | 12  | 235  | 26.8  | 6.52 |
| Q7M759   | Alpha/beta hydrolase domain-containing protein 17B OS=Mus musculus<br>GN=Abhd17b PE=2 SV=1 - [AB17B_MOUSE]                       | 39.58 | 1  | 7  | 8  | 19  | 0.628 | 0.571 | 1.141 | 1.112 | 47.67  | 39.58 | 14 | 19  | 288  | 32.2  | 6.29 |
| Q61411   | GTPase HRas OS=Mus musculus<br>GN=Hras1 PE=1 SV=2 - [RASH_MOUSE]                                                                 | 77.78 | 5  | 5  | 12 | 109 | 0.581 | 0.925 | 1.112 | 1.112 | 266.41 | 77.78 | 22 | 109 | 189  | 21.3  | 5.31 |
| Q8K2Z8-2 | Isoform 2 of Ubiquitin-conjugating enzyme E2 Q2<br>OS=Mus musculus<br>GN=Ube2q2 -                                                | 12.94 | 4  | 1  | 3  | 6   | 1.180 | 0.939 | 1.064 | 1.112 | 18.17  | 12.94 | 5  | 6   | 255  | 28.9  | 4.83 |
| H3BK59   | Atrial natriuretic peptide-converting enzyme<br>OS=Mus musculus<br>GN=Corin PE=2 SV=1 - [H3BK59_MOUSE]                           | 5.00  | 5  | 2  | 3  | 4   | 0.804 | 1.160 | 1.243 | 1.112 | 4.50   | 5.00  | 3  | 4   | 980  | 109.3 | 5.22 |
| P42128   | Forkhead box protein K1<br>OS=Mus musculus<br>GN=Foxk1 PE=1 SV=2 - [FOXK1_MOUSE]                                                 | 19.33 | 1  | 8  | 8  | 15  | 0.820 | 1.233 | 1.222 | 1.113 | 42.21  | 19.33 | 11 | 15  | 719  | 74.9  | 9.17 |
| O35604   | Niemann-Pick C1 protein<br>OS=Mus musculus<br>GN=Npc1 PE=1 SV=2 - [NPC1_MOUSE]                                                   | 6.50  | 1  | 6  | 6  | 10  | 0.908 | 0.785 | 1.011 | 1.113 | 24.12  | 6.50  | 8  | 10  | 1277 | 142.8 | 5.71 |
| Q18PE0-2 | Isoform 2 of Protein Dok-7<br>OS=Mus musculus<br>GN=Dok7 - [DOK7_MOUSE]                                                          | 10.00 | 3  | 2  | 2  | 3   | 1.296 | 0.907 | 0.880 | 1.113 | 10.28  | 10.00 | 3  | 3   | 360  | 37.1  | 7.14 |
| Q8R2D7   | Protein Vmn1r26 OS=Mus musculus<br>GN=Vmn1r26 PE=4 SV=1 - [Q8R2D7_MOUSE]                                                         | 7.96  | 1  | 1  | 1  | 1   | 1.568 | 3.943 | 1.094 | 1.113 | 0.00   | 7.96  | 1  | 1   | 339  | 38.8  | 9.45 |
| Q8BLE7   | Vesicular glutamate transporter 2 OS=Mus musculus<br>GN=Slc17a6 PE=1 SV=1 -                                                      | 16.84 | 1  | 10 | 10 | 85  | 0.613 | 0.483 | 0.744 | 1.113 | 237.62 | 16.84 | 17 | 85  | 582  | 64.5  | 6.68 |
| A6H8H2   | DENN domain-containing protein 4C OS=Mus musculus<br>GN=Dennd4c PE=1 SV=1 -                                                      | 7.87  | 4  | 12 | 12 | 24  | 0.672 | 1.061 | 1.037 | 1.113 | 61.96  | 7.87  | 19 | 24  | 1906 | 211.3 | 6.40 |
| Q3TYX3   | SET and MYND domain-containing protein 5<br>OS=Mus musculus<br>GN=Smyd5 PE=2 SV=2 - [SMYD5_MOUSE]                                | 20.91 | 1  | 8  | 8  | 19  | 0.671 | 1.339 | 1.064 | 1.113 | 35.50  | 20.91 | 12 | 19  | 416  | 47.1  | 5.21 |
| Q14B11   | Protein FAM89A OS=Mus musculus<br>GN=Fam89a PE=2 SV=2 - [FA89A_MOUSE]                                                            | 12.00 | 1  | 1  | 1  | 1   | 8.778 | 2.671 | 1.043 | 1.113 | 2.60   | 12.00 | 1  | 1   | 175  | 18.7  | 5.80 |
| Q8BU31   | Ras-related protein Rap-2c OS=Mus musculus<br>GN=Rap2c PE=1 SV=1 - [RAP2C_MOUSE]                                                 | 73.22 | 2  | 4  | 10 | 66  | 0.643 | 0.837 | 0.940 | 1.113 | 223.95 | 73.22 | 20 | 66  | 183  | 20.7  | 4.94 |
| Q3UX10   | Tubulin alpha chain-like 3 OS=Mus musculus<br>GN=Tuba3 PE=2 SV=2 - [TBAL3_MOUSE]                                                 | 16.59 | 1  | 3  | 6  | 58  | 1.076 | 1.195 | 0.981 | 1.113 | 124.11 | 16.59 | 10 | 58  | 446  | 50.0  | 5.58 |
| Q91YH5   | Atlastin-3 OS=Mus musculus<br>GN=Atb3 PE=2 SV=1 - [ATLA3_MOUSE]                                                                  | 40.11 | 3  | 14 | 16 | 45  | 0.995 | 1.148 | 1.031 | 1.113 | 142.30 | 40.11 | 30 | 45  | 541  | 60.5  | 6.10 |



|          |                                                                                                                         |       |   |    |    |     |       |       |       |       |         |       |    |     |      |       |       |
|----------|-------------------------------------------------------------------------------------------------------------------------|-------|---|----|----|-----|-------|-------|-------|-------|---------|-------|----|-----|------|-------|-------|
| Q8K2A1   | PTB domain-containing engulfment adapter protein 1 OS=Mus musculus GN=Gulp1 PE=1 SV=1 - [GULP1_MOUSE]                   | 9.54  | 3 | 3  | 3  | 3   | 1.539 | 1.147 | 1.051 | 1.113 | 8.13    | 9.54  | 3  | 3   | 304  | 34.4  | 7.90  |
| Q9ESN6   | Tripartite motif-containing protein 2 OS=Mus musculus GN=Trim2 PE=1 SV=1 - [TRIM2_MOUSE]                                | 43.55 | 8 | 23 | 25 | 172 | 0.968 | 0.846 | 1.200 | 1.113 | 508.73  | 43.55 | 44 | 172 | 744  | 81.4  | 6.96  |
| Q99JY8   | Lipid phosphate phosphohydrolase 3 OS=Mus musculus GN=Ppap2b PE=1 SV=1 - [PPAP2B_MOUSE]                                 | 24.36 | 1 | 10 | 10 | 62  | 0.508 | 1.077 | 1.057 | 1.113 | 178.96  | 24.36 | 17 | 62  | 312  | 35.2  | 9.07  |
| Q9J191   | Alpha-actinin-2 OS=Mus musculus GN=Actn2 PE=1 SV=2 - [ACTN2_MOUSE]                                                      | 63.09 | 4 | 34 | 49 | 223 | 0.975 | 3.948 | 3.777 | 1.113 | 634.19  | 63.09 | 89 | 223 | 894  | 103.8 | 5.45  |
| Q8BGN5   | NIPA-like protein 3 OS=Mus musculus GN=Nipal3 PE=2 SV=1 - [NPAL3_MOUSE]                                                 | 12.20 | 3 | 3  | 3  | 7   | 0.853 | 0.882 | 1.393 | 1.113 | 34.71   | 12.20 | 4  | 7   | 410  | 44.8  | 7.75  |
| Q810J8   | Zinc finger FYVE domain-containing protein 1 OS=Mus musculus GN=Zfyve1 PE=2 SV=2 - [ZFYV1_MOUSE]                        | 25.23 | 1 | 15 | 15 | 39  | 0.724 | 0.973 | 1.030 | 1.113 | 118.45  | 25.23 | 26 | 39  | 777  | 86.9  | 7.34  |
| Q9Z1P6   | NADH dehydrogenase [ubiquinone] 1 alpha subcomplex subunit 7 OS=Mus musculus GN=Ndufa7 PE=1 SV=3 - [NDUFA7_MOUSE]       | 73.45 | 1 | 13 | 13 | 104 | 1.063 | 1.012 | 1.373 | 1.113 | 296.03  | 73.45 | 24 | 104 | 113  | 12.6  | 10.17 |
| Q8BKZ9   | Pyruvate dehydrogenase protein X component, mitochondrial OS=Mus musculus GN=Pdhx PE=2 SV=1 - [ODPX_MOUSE]              | 45.71 | 3 | 18 | 18 | 140 | 1.069 | 1.114 | 1.248 | 1.113 | 358.44  | 45.71 | 31 | 140 | 501  | 54.0  | 7.75  |
| O35864   | COP9 signalosome complex subunit 5 OS=Mus musculus GN=Cops5 PE=1 SV=3 - [COPS5_MOUSE]                                   | 56.29 | 1 | 15 | 15 | 80  | 0.912 | 1.090 | 0.969 | 1.113 | 233.02  | 56.29 | 25 | 80  | 334  | 37.5  | 6.54  |
| Q61644   | Protein kinase C and casein kinase substrate in neurons protein 1 OS=Mus musculus GN=Pacsin1 PE=1 SV=1 - [PACSN1_MOUSE] | 61.90 | 1 | 28 | 30 | 439 | 1.420 | 1.313 | 1.660 | 1.113 | 1358.09 | 61.90 | 54 | 439 | 441  | 50.5  | 5.24  |
| I7HJR1   | Collagen alpha-2(DX) chain OS=Mus musculus GN=Col9a2 PE=4 SV=1 - [I7HJR1_MOUSE]                                         | 2.03  | 2 | 1  | 1  | 1   | 0.875 | 0.724 | 1.270 | 1.113 | 2.94    | 2.03  | 1  | 1   | 688  | 65.3  | 9.52  |
| D3YV40   | Protein kinase C-binding protein NELL1 (Fragment) OS=Mus musculus GN=Nell1 PE=2 SV=1 - [D3YV40_MOUSE]                   | 7.92  | 3 | 3  | 3  | 5   | 0.676 | 0.811 | 0.873 | 1.113 | 11.39   | 7.92  | 5  | 5   | 379  | 42.3  | 8.65  |
| F6TY66   | Claudin-10A (Fragment) OS=Mus musculus GN=Cldn10 PE=4 SV=1 - [F6TY66_MOUSE]                                             | 21.31 | 5 | 2  | 2  | 9   | 0.752 | 0.667 | 1.125 | 1.113 | 28.09   | 21.31 | 3  | 9   | 122  | 13.1  | 8.76  |
| Q8BHC9   | Alpha-(1,3)-fucosyltransferase 11 OS=Mus musculus GN=Fut11 PE=2 SV=1 - [FUT11_MOUSE]                                    | 7.16  | 1 | 2  | 2  | 4   | 1.033 | 1.053 | 0.979 | 1.113 | 10.80   | 7.16  | 4  | 4   | 489  | 55.5  | 6.23  |
| Q9JL62   | Glycolipid transfer protein OS=Mus musculus GN=Gltp PE=2 SV=3 - [GLTP_MOUSE]                                            | 53.11 | 3 | 9  | 9  | 46  | 0.892 | 0.338 | 0.899 | 1.113 | 136.48  | 53.11 | 16 | 46  | 209  | 23.7  | 7.39  |
| P62823   | Ras-related protein Rab-3C OS=Mus musculus GN=Rab3c PE=1 SV=1 - [RAB3C_MOUSE]                                           | 60.79 | 1 | 6  | 13 | 255 | 0.820 | 1.149 | 1.148 | 1.114 | 733.06  | 60.79 | 25 | 255 | 227  | 25.9  | 5.24  |
| A2AIV2   | Protein virilizer homolog OS=Mus musculus GN=Kiaa1429 PE=1 SV=1 [VIR_MOUSE]                                             | 3.09  | 3 | 3  | 5  | 11  | 2.460 | 1.002 | 0.895 | 1.114 | 34.37   | 3.09  | 7  | 11  | 1811 | 201.3 | 4.96  |
| P16388   | Potassium voltage-gated channel subfamily A member 1 OS=Mus musculus GN=Kcna1 PE=2 SV=1 - [KCNA1_MOUSE]                 | 26.26 | 3 | 5  | 10 | 50  | 1.062 | 0.479 | 1.425 | 1.114 | 156.26  | 26.26 | 17 | 50  | 495  | 56.4  | 5.14  |
| A2AG06-2 | Isoform 2 of Uncharacterized protein C17orf104 homolog OS=Mus musculus GN=Gm1564 - [G1564_MOUSE]                        | 2.53  | 2 | 2  | 2  | 4   | 0.990 | 1.175 | 0.904 | 1.114 | 8.24    | 2.53  | 2  | 4   | 909  | 102.8 | 6.80  |
| Q8CAL5   | Glypican-5 OS=Mus musculus GN=Gpc5 PE=2 SV=1 - [GPC5_MOUSE]                                                             | 12.94 | 3 | 7  | 7  | 15  | 0.916 | 0.975 | 0.878 | 1.114 | 38.85   | 12.94 | 11 | 15  | 572  | 63.8  | 7.30  |
| Q9EQZ6-3 | Isoform 3 of Rap guanine nucleotide exchange factor 4 OS=Mus musculus GN=Rapgaf4 - [RPGF4_MOUSE]                        | 31.92 | 4 | 27 | 30 | 107 | 0.614 | 1.228 | 1.084 | 1.114 | 283.23  | 31.92 | 52 | 107 | 993  | 113.4 | 6.83  |
| A2ASQ1   | Aggrin OS=Mus musculus GN=Aggrn PE=1 SV=1 - [AGGRN_MOUSE]                                                               | 21.23 | 1 | 2  | 33 | 117 | 0.858 | 1.354 | 1.096 | 1.114 | 341.40  | 21.23 | 59 | 117 | 1950 | 207.4 | 6.32  |
| Q9R049-2 | Isoform 2 of E3 ubiquitin-protein ligase AMFR OS=Mus musculus GN=Amfr - [AMFR_MOUSE]                                    | 12.52 | 2 | 5  | 5  | 6   | 0.830 | 0.970 | 1.115 | 1.114 | 18.20   | 12.52 | 6  | 6   | 639  | 72.7  | 6.46  |
| P97785   | GDNF family receptor alpha-1 OS=Mus musculus GN=Gfra1 PE=2 SV=2 - [GFRA1_MOUSE]                                         | 24.36 | 5 | 9  | 10 | 21  | 0.679 | 0.446 | 0.735 | 1.114 | 61.92   | 24.36 | 16 | 21  | 468  | 51.7  | 7.84  |
| Q6PF93   | Phosphatidylinositol 3-kinase catalytic subunit type 3 OS=Mus musculus GN=Pik3c3 PE=1 SV=1 - [PIK3C3_MOUSE]             | 25.48 | 5 | 19 | 20 | 44  | 0.832 | 1.027 | 1.068 | 1.114 | 127.17  | 25.48 | 32 | 44  | 887  | 101.4 | 6.73  |

|          |                                                                                                                     |       |   |    |    |     |       |       |       |       |         |       |    |     |      |       |       |
|----------|---------------------------------------------------------------------------------------------------------------------|-------|---|----|----|-----|-------|-------|-------|-------|---------|-------|----|-----|------|-------|-------|
| Q8BXA7   | PH domain leucine-rich repeat-containing protein phosphatase 2 OS=Mus musculus GN=Phlpp2 PE=2 SV=3 - [PHLPP2_MOUSE] | 2.35  | 2 | 3  | 3  | 4   | 0.889 | 0.922 | 0.933 | 1.114 | 13.23   | 2.35  | 4  | 4   | 1320 | 145.9 | 5.95  |
| Q9D8U8   | Sorting nexin-5 OS=Mus musculus GN=Snx5 PE=1 SV=1 - [SNX5_MOUSE]                                                    | 40.35 | 1 | 15 | 16 | 63  | 1.421 | 1.264 | 0.926 | 1.114 | 185.06  | 40.35 | 28 | 63  | 404  | 46.8  | 6.62  |
| POC913   | Overexpressed in colon carcinoma 1 protein homolog OS=Mus musculus PE=3 SV=1 - [POC913_MOUSE]                       | 46.03 | 1 | 2  | 2  | 3   | 1.244 | 1.254 | 0.894 | 1.114 | 14.17   | 46.03 | 2  | 3   | 63   | 6.4   | 6.57  |
| Q9CQF9   | Prenylcysteine oxidase OS=Mus musculus GN=Pcyox1 PE=1 SV=1 - [PCYOX_MOUSE]                                          | 38.22 | 3 | 14 | 14 | 70  | 0.968 | 1.364 | 0.940 | 1.114 | 199.26  | 38.22 | 25 | 70  | 505  | 56.5  | 6.92  |
| E9QKV6   | Unconventional myosin-Ixb OS=Mus musculus GN=Myo9b PE=2 SV=1 - [E9QKV6_MOUSE]                                       | 4.08  | 6 | 5  | 5  | 13  | 1.363 | 0.782 | 1.009 | 1.114 | 14.96   | 4.08  | 7  | 13  | 1961 | 222.3 | 8.40  |
| Q9D3D9   | ATP synthase subunit delta, mitochondrial OS=Mus musculus GN=Atp5d PE=1 SV=1 - [ATPD_MOUSE]                         | 44.05 | 2 | 4  | 5  | 49  | 1.836 | 1.257 | 1.557 | 1.115 | 121.61  | 44.05 | 8  | 49  | 168  | 17.6  | 5.08  |
| P62827   | GTP-binding nuclear protein Ran OS=Mus musculus GN=Ran PE=1 SV=3 - [RAN_MOUSE]                                      | 48.61 | 2 | 4  | 11 | 92  | 0.425 | 0.914 | 0.857 | 1.115 | 257.50  | 48.61 | 21 | 92  | 216  | 24.4  | 7.49  |
| Q8VC03   | Echinoderm microtubule-associated protein-like 3 OS=Mus musculus GN=Emi3 PE=2 SV=1 - [EMAL3_MOUSE]                  | 5.80  | 1 | 4  | 4  | 8   | 1.736 | 0.803 | 1.070 | 1.115 | 23.16   | 5.80  | 8  | 8   | 897  | 95.6  | 7.05  |
| P12032   | Metalloproteinase inhibitor 1 OS=Mus musculus GN=Timp1 PE=2 SV=2 - [TIMP1_MOUSE]                                    | 4.39  | 1 | 1  | 1  | 2   | 1.322 | 1.192 | 0.939 | 1.115 | 2.24    | 4.39  | 1  | 2   | 205  | 22.6  | 8.82  |
| Q80UJ7   | Rab3 GTPase-activating protein catalytic subunit OS=Mus musculus GN=Rab3gap1 PE=2 SV=4 - [RB3GP_MOUSE]              | 39.76 | 1 | 34 | 34 | 158 | 0.695 | 1.172 | 1.009 | 1.115 | 470.67  | 39.76 | 64 | 158 | 981  | 110.1 | 5.73  |
| Q9DB05   | Alpha-soluble NSF attachment protein OS=Mus musculus GN=Napa PE=1 SV=1 - [SNAA_MOUSE]                               | 70.17 | 1 | 13 | 18 | 154 | 0.842 | 1.172 | 1.006 | 1.115 | 472.47  | 70.17 | 32 | 154 | 295  | 33.2  | 5.45  |
| Q3UHB1   | 5'-nucleotidase domain-containing protein 3 OS=Mus musculus GN=NT5d3 PE=2 SV=1 - [NT5D3_MOUSE]                      | 46.34 | 1 | 20 | 20 | 73  | 0.635 | 0.993 | 1.034 | 1.115 | 220.22  | 46.34 | 36 | 73  | 546  | 63.1  | 8.56  |
| Q8CC35   | Synaptopodin OS=Mus musculus GN=Synpo PE=1 SV=2 - [SYNPO_MOUSE]                                                     | 37.24 | 4 | 23 | 23 | 132 | 1.086 | 2.870 | 4.190 | 1.115 | 435.04  | 37.24 | 39 | 132 | 929  | 99.5  | 9.42  |
| Q9DAC9   | POU domain, class 5, transcription factor 2 OS=Mus musculus GN=Pou5f2 PE=2 SV=1 - [PO5F2_MOUSE]                     | 27.36 | 1 | 4  | 5  | 8   | 2.426 | 0.150 | 1.658 | 1.115 | 13.45   | 27.36 | 5  | 8   | 329  | 36.4  | 8.91  |
| Q3UDK1-2 | Isoform 2 of TRAF-type zinc finger domain-containing protein 1 OS=Mus musculus GN=Trafd1 - [TRAFD1_MOUSE]           | 12.85 | 3 | 6  | 6  | 12  | 1.589 | 1.251 | 1.458 | 1.115 | 28.48   | 12.85 | 9  | 12  | 576  | 63.8  | 5.41  |
| D3Z5R9   | Cytoplasmic polyadenylation element-binding protein 3 OS=Mus musculus GN=Cpeb3 PE=2 SV=1 - [D3Z5R9_MOUSE]           | 27.61 | 1 | 2  | 14 | 52  | 1.747 | 0.959 | 1.247 | 1.115 | 140.57  | 27.61 | 24 | 52  | 699  | 76.2  | 7.03  |
| J3QPNS   | Uncharacterized protein OS=Mus musculus GN=Flg PE=4 SV=1 - [J3QPNS_MOUSE]                                           | 5.16  | 8 | 1  | 1  | 1   | 0.498 | 7.025 | 0.808 | 1.115 | 1.86    | 5.16  | 1  | 1   | 252  | 26.7  | 10.90 |
| D3Z399   | F-box/LRR-repeat protein 13 OS=Mus musculus GN=Fbxl13 PE=2 SV=1 - [D3Z399_MOUSE]                                    | 2.85  | 2 | 1  | 1  | 1   | 0.951 | 0.816 | 1.270 | 1.115 | 0.00    | 2.85  | 1  | 1   | 632  | 72.5  | 9.03  |
| Q8RS16   | Glutathione S-transferase mu 4 OS=Mus musculus GN=Gstm4 PE=2 SV=1 - [Q8RS16_MOUSE]                                  | 30.28 | 3 | 2  | 7  | 130 | 0.830 | 1.889 | 1.032 | 1.115 | 479.25  | 30.28 | 12 | 130 | 218  | 25.5  | 6.93  |
| Q8VE18   | Protein SMG8 OS=Mus musculus GN=Smg8 PE=2 SV=1 - [SMG8_MOUSE]                                                       | 6.16  | 2 | 5  | 5  | 12  | 1.099 | 1.106 | 1.097 | 1.115 | 26.08   | 6.16  | 9  | 12  | 991  | 109.6 | 7.77  |
| P12787   | Cytochrome c oxidase subunit 5A, mitochondrial OS=Mus musculus GN=Cox5a PE=1 SV=2 - [COX5A_MOUSE]                   | 59.59 | 1 | 9  | 10 | 429 | 1.472 | 0.974 | 1.374 | 1.115 | 1124.29 | 59.59 | 18 | 429 | 146  | 16.1  | 6.54  |
| Q8BGC9   | Protein CREG2 OS=Mus musculus GN=Creg2 PE=1 SV=1 - [CREG2_MOUSE]                                                    | 9.03  | 1 | 2  | 2  | 5   | 1.902 | 1.137 | 0.890 | 1.116 | 17.14   | 9.03  | 3  | 5   | 288  | 31.7  | 7.77  |
| Q3UU35   | Ovostatin homolog OS=Mus musculus GN=Ovos PE=2 SV=2 - [OVOS_MOUSE]                                                  | 4.40  | 1 | 3  | 3  | 3   | 3.032 | 1.767 | 0.814 | 1.116 | 6.24    | 4.40  | 3  | 3   | 1456 | 162.2 | 5.26  |
| Q9D1X0   | Nucleolar protein 3 OS=Mus musculus GN=Nol3 PE=1 SV=1 - [NOL3_MOUSE]                                                | 47.73 | 1 | 7  | 7  | 48  | 1.531 | 0.855 | 1.250 | 1.116 | 184.78  | 47.73 | 14 | 48  | 220  | 24.6  | 4.07  |

|          |                                                                                                                   |       |   |    |    |      |       |       |       |       |         |       |     |      |      |       |      |
|----------|-------------------------------------------------------------------------------------------------------------------|-------|---|----|----|------|-------|-------|-------|-------|---------|-------|-----|------|------|-------|------|
| Q8R1K1   | Ubiquitin-associated domain-containing protein 2 OS=Mus musculus GN=Uba2 PE=2 SV=1 - [UBAC2_MOUSE]                | 12.17 | 1 | 4  | 4  | 19   | 0.838 | 0.893 | 0.897 | 1.116 | 51.96   | 12.17 | 7   | 19   | 345  | 39.0  | 9.44 |
| Q78Y26-3 | Isoform 3 of Short coiled-coil protein OS=Mus musculus GN=Scoc - [SCOC_MOUSE]                                     | 22.22 | 3 | 1  | 1  | 13   | 2.691 | 0.826 | 1.208 | 1.116 | 35.92   | 22.22 | 2   | 13   | 81   | 9.3   | 4.75 |
| Q8C739   | Protein FAM110B OS=Mus musculus GN=Fam110b PE=2 SV=1 - [F110B_MOUSE]                                              | 34.70 | 2 | 9  | 9  | 24   | 1.339 | 0.964 | 1.378 | 1.116 | 59.44   | 34.70 | 15  | 24   | 366  | 40.3  | 9.23 |
| O88342   | WD repeat-containing protein 1 OS=Mus musculus GN=Wdr1 PE=1 SV=3 - [WDR1_MOUSE]                                   | 62.21 | 1 | 31 | 31 | 243  | 1.165 | 1.256 | 0.947 | 1.116 | 830.65  | 62.21 | 55  | 243  | 606  | 66.4  | 6.60 |
| P31750   | RAC-alpha serine/threonine-protein kinase OS=Mus musculus GN=Akt1 PE=1 SV=2 - [AKT1_MOUSE]                        | 34.79 | 4 | 7  | 14 | 32   | 0.738 | 0.914 | 1.016 | 1.116 | 82.53   | 34.79 | 24  | 32   | 480  | 55.7  | 5.90 |
| D3YXS8   | Mitochondrial import receptor subunit TOM40B OS=Mus musculus GN=Tomm40 PE=2 SV=1 - [D3YXS8_MOUSE]                 | 22.99 | 5 | 5  | 5  | 18   | 0.878 | 1.345 | 1.284 | 1.116 | 58.88   | 22.99 | 8   | 18   | 274  | 30.4  | 7.27 |
| O08539   | Myc box-dependent-interacting protein 1 OS=Mus musculus GN=Bin1 PE=1 SV=1 - [BIN1_MOUSE]                          | 57.31 | 3 | 29 | 31 | 471  | 1.535 | 1.018 | 1.508 | 1.116 | 1304.70 | 57.31 | 59  | 471  | 588  | 64.4  | 5.03 |
| Q5U3K5   | Rab-like protein 6 OS=Mus musculus GN=Rab6 PE=1 SV=2 - [RABL6_MOUSE]                                              | 29.93 | 1 | 19 | 19 | 50   | 0.858 | 1.053 | 1.161 | 1.116 | 162.72  | 29.93 | 29  | 50   | 725  | 79.8  | 5.53 |
| Q9CY45   | N(6)-adenine-specific DNA methyltransferase 2 OS=Mus musculus GN=N6amt2 PE=2 SV=1 - [N6MT2_MOUSE]                 | 22.90 | 1 | 4  | 4  | 7    | 2.235 | 1.028 | 1.044 | 1.117 | 20.47   | 22.90 | 5   | 7    | 214  | 24.5  | 4.67 |
| Q61391   | Nephrysin OS=Mus musculus GN=Mme PE=1 SV=3 - [NEP_MOUSE]                                                          | 11.20 | 1 | 9  | 9  | 17   | 0.987 | 0.871 | 1.262 | 1.117 | 30.34   | 11.20 | 14  | 17   | 750  | 85.6  | 5.81 |
| E9PUZ5   | PRKCA-binding protein OS=Mus musculus GN=Pick1 PE=4 SV=1 - [E9PUZ5_MOUSE]                                         | 33.65 | 2 | 2  | 13 | 48   | 0.751 | 1.553 | 0.920 | 1.117 | 143.95  | 33.65 | 22  | 48   | 416  | 46.5  | 5.30 |
| Q6P8M1   | Putative deoxyribonuclease TATDN1 OS=Mus musculus GN=Tatdn1 PE=2 SV=1 - [TATDN1_MOUSE]                            | 30.51 | 2 | 7  | 7  | 12   | 1.244 | 1.144 | 1.096 | 1.117 | 34.79   | 30.51 | 10  | 12   | 295  | 33.3  | 6.18 |
| B1AYL1   | Protein Scn7a OS=Mus musculus GN=Scn7a PE=2 SV=1 - [B1AYL1_MOUSE]                                                 | 7.61  | 1 | 8  | 8  | 14   | 1.777 | 1.699 | 0.858 | 1.117 | 33.64   | 7.61  | 10  | 14   | 1681 | 192.1 | 7.42 |
| B1AYM9   | Protein CK137956 OS=Mus musculus GN=CK137956 PE=2 SV=1 - [B1AYM9_MOUSE]                                           | 10.07 | 1 | 3  | 3  | 6    | 0.611 | 1.599 | 0.870 | 1.117 | 2.80    | 10.07 | 3   | 6    | 596  | 65.4  | 8.92 |
| Q8K482   | EMILIN-2 OS=Mus musculus GN=Emilin2 PE=1 SV=1 - [EMIL2_MOUSE]                                                     | 3.54  | 1 | 3  | 3  | 8    | 1.435 | 1.188 | 1.130 | 1.117 | 20.64   | 3.54  | 6   | 8    | 1074 | 117.2 | 5.62 |
| P08553   | Neurofilament medium polypeptide OS=Mus musculus GN=Nefm PE=1 SV=4 - [NFM_MOUSE]                                  | 57.08 | 2 | 47 | 52 | 1382 | 3.004 | 0.348 | 1.579 | 1.117 | 3833.99 | 57.08 | 93  | 1382 | 848  | 95.9  | 4.77 |
| Q9DCJ5   | NADH dehydrogenase [ubiquinone] 1 alpha subcomplex subunit 8 OS=Mus musculus GN=Ndufa8 PE=1 SV=3 - [NDUFA8_MOUSE] | 47.09 | 1 | 7  | 7  | 61   | 1.017 | 0.905 | 1.099 | 1.117 | 147.79  | 47.09 | 14  | 61   | 172  | 20.0  | 8.46 |
| Q9DBC3   | Cap-specific mRNA (nucleoside-2'-O-)-methyltransferase 1 OS=Mus musculus GN=Ftsj2 PE=1 SV=1 - [F1TSD1_MOUSE]      | 23.30 | 4 | 15 | 17 | 37   | 0.775 | 1.022 | 0.961 | 1.118 | 86.76   | 23.30 | 26  | 37   | 837  | 95.6  | 7.27 |
| O70176   | Pituitary adenylate cyclase-activating polypeptide OS=Mus musculus GN=Adcyap1 PE=2 SV=1 - [PACA_MOUSE]            | 40.57 | 1 | 7  | 7  | 21   | 1.551 | 0.902 | 0.669 | 1.118 | 57.62   | 40.57 | 13  | 21   | 175  | 19.4  | 9.23 |
| A2AL18   | Rho GTPase-activating protein 11A OS=Mus musculus GN=Arhgap11a PE=2 SV=1 - [ARHAP11_MOUSE]                        | 4.60  | 3 | 1  | 1  | 1    | 0.938 | 1.072 | 1.319 | 1.118 | 3.49    | 4.60  | 1   | 1    | 457  | 50.4  | 9.86 |
| Q3U4B1   | Protein Ssbp4 OS=Mus musculus GN=Ssbp4 PE=2 SV=1 - [Q3U4B1_MOUSE]                                                 | 8.26  | 1 | 2  | 2  | 4    | 1.426 | 1.256 | 1.718 | 1.118 | 10.90   | 8.26  | 4   | 4    | 363  | 37.4  | 6.64 |
| K3W4R5   | Cytoskeleton-associated protein 5 OS=Mus musculus GN=Ckap5 PE=4 SV=1 - [K3W4R5_MOUSE]                             | 42.62 | 4 | 78 | 79 | 278  | 0.627 | 0.883 | 0.997 | 1.118 | 733.67  | 42.62 | 140 | 278  | 2032 | 225.5 | 7.85 |
| P24270   | Catalase OS=Mus musculus GN=Cat PE=1 SV=4 - [CATA_MOUSE]                                                          | 61.48 | 2 | 25 | 25 | 161  | 1.592 | 0.757 | 0.717 | 1.118 | 468.13  | 61.48 | 45  | 161  | 527  | 59.8  | 7.88 |
| Q9JKF7   | 39S ribosomal protein L39, mitochondrial OS=Mus musculus GN=Mrp39 PE=2 SV=4 - [RM39_MOUSE]                        | 25.00 | 1 | 7  | 7  | 9    | 1.151 | 1.058 | 1.123 | 1.118 | 25.83   | 25.00 | 8   | 9    | 336  | 38.5  | 7.94 |
| Q66JW3   | Thymocyte selection-associated high mobility group box protein TOX OS=Mus musculus GN=Tox PE=1 SV=2 - [TOX_MOUSE] | 6.65  | 1 | 2  | 4  | 9    | 6.312 | 0.563 | 1.584 | 1.118 | 20.98   | 6.65  | 7   | 9    | 526  | 57.2  | 7.27 |

|          |                                                                                                                                |       |   |    |    |     |       |       |       |       |        |       |    |     |      |       |       |
|----------|--------------------------------------------------------------------------------------------------------------------------------|-------|---|----|----|-----|-------|-------|-------|-------|--------|-------|----|-----|------|-------|-------|
| J3QP43   | Protein 6330403A02Rik<br>OS=Mus musculus<br>GN=6330403A02Rik PE=4<br>SV=1 - [J3QP43_MOUSE]                                     | 21.28 | 2 | 2  | 2  | 74  | 0.836 | 3.066 | 1.855 | 1.118 | 256.14 | 21.28 | 4  | 74  | 141  | 15.0  | 6.51  |
| Q9D975   | Sulfiredoxin-1 OS=Mus musculus GN=Srxn1 PE=2<br>SV=1 - [SRXN1_MOUSE]                                                           | 23.53 | 2 | 3  | 3  | 6   | 1.784 | 0.941 | 0.935 | 1.118 | 17.81  | 23.53 | 5  | 6   | 136  | 14.1  | 8.02  |
| Q9D328   | Transmembrane protein 35<br>OS=Mus musculus<br>GN=Tmem35 PE=2 SV=1 - [TMM35_MOUSE]                                             | 13.17 | 2 | 3  | 3  | 13  | 1.510 | 1.513 | 1.195 | 1.118 | 42.37  | 13.17 | 4  | 13  | 167  | 18.5  | 9.99  |
| Q9CPQ8   | ATP synthase subunit g, mitochondrial OS=Mus musculus GN=Atp5l PE=1<br>SV=1 - [ATP5L_MOUSE]                                    | 63.11 | 3 | 7  | 8  | 116 | 0.633 | 1.142 | 1.069 | 1.118 | 328.27 | 63.11 | 14 | 116 | 103  | 11.4  | 9.74  |
| Q9CRT8   | Exportin-T OS=Mus musculus GN=Xpot PE=2<br>SV=3 - [XPOT_MOUSE]                                                                 | 9.14  | 1 | 8  | 8  | 30  | 0.995 | 1.289 | 0.902 | 1.118 | 76.41  | 9.14  | 14 | 30  | 963  | 109.7 | 5.25  |
| O54791   | Transcription factor Maff<br>OS=Mus musculus<br>GN=Maff PE=2 SV=1 - [MAFF_MOUSE]                                               | 4.49  | 3 | 1  | 1  | 2   | 0.908 | 0.467 | 1.066 | 1.118 | 4.99   | 4.49  | 2  | 2   | 156  | 16.9  | 9.80  |
| Q8R015-2 | Isoform 2 of Biogenesis of lysosome-related organelles complex 1 subunit 5 OS=Mus musculus GN=Blc1s5 - [BL1S5_MOUSE]           | 13.61 | 2 | 2  | 2  | 2   | 1.293 | 1.246 | 1.000 | 1.118 | 4.77   | 13.61 | 2  | 2   | 169  | 18.8  | 6.87  |
| Q8K3H0   | DCC-interacting protein 13-alpha OS=Mus musculus GN=App1 PE=1 SV=1 - [DP13A_MOUSE]                                             | 47.95 | 1 | 25 | 27 | 131 | 0.834 | 1.264 | 1.141 | 1.118 | 430.41 | 47.95 | 46 | 131 | 707  | 79.3  | 5.41  |
| Q8C4X2   | Casein kinase I isoform gamma-3 OS=Mus musculus GN=Csk1g3 PE=1 SV=2 -                                                          | 36.32 | 1 | 5  | 12 | 26  | 0.708 | 0.578 | 0.979 | 1.118 | 102.31 | 36.32 | 18 | 26  | 424  | 48.9  | 9.11  |
| O70370   | Cathepsin S OS=Mus musculus GN=Ctss PE=2<br>SV=2 - [CATS_MOUSE]                                                                | 22.35 | 2 | 5  | 5  | 11  | 1.318 | 1.340 | 1.631 | 1.119 | 31.16  | 22.35 | 8  | 11  | 340  | 38.4  | 6.96  |
| Q5EBJ4   | Ermin OS=Mus musculus GN=Ermin PE=1 SV=1 - [ERMIN_MOUSE]                                                                       | 53.02 | 1 | 12 | 13 | 243 | 2.826 | 0.441 | 1.432 | 1.119 | 679.78 | 53.02 | 22 | 243 | 281  | 32.1  | 4.59  |
| Q8C7U7   | Polypeptide N-acetylgalactosaminyltransferase 6 OS=Mus musculus GN=Galt6 PE=2 SV=1 - [GALT6_MOUSE]                             | 0.96  | 1 | 1  | 1  | 1   | 0.717 | 1.227 | 1.327 | 1.119 | 1.86   | 0.96  | 1  | 1   | 622  | 71.5  | 8.53  |
| Q8BLQ9-3 | Isoform 3 of Cell adhesion molecule 2 OS=Mus musculus GN=Cadm2 - [CADM2_MOUSE]                                                 | 42.03 | 5 | 14 | 14 | 118 | 0.638 | 1.227 | 1.707 | 1.119 | 307.82 | 42.03 | 24 | 118 | 395  | 43.5  | 5.33  |
| E9Q9S2   | Centrosomal protein of 89 kDa OS=Mus musculus GN=Cep89 PE=2 SV=1 - [E9Q9S2_MOUSE]                                              | 2.19  | 2 | 1  | 1  | 1   | 1.141 | 0.897 | 1.252 | 1.119 | 3.00   | 2.19  | 1  | 1   | 639  | 73.0  | 8.19  |
| Q3TL53   | GDP-D-glucose phosphorylase 1 OS=Mus musculus GN=Gdpgp1 PE=2 SV=2 -                                                            | 25.65 | 1 | 8  | 8  | 32  | 0.710 | 1.091 | 1.157 | 1.119 | 92.47  | 25.65 | 16 | 32  | 386  | 42.5  | 6.19  |
| A2ABY3   | Ethanolamine-phosphate cytidyltransferase OS=Mus musculus GN=Pcyt2 PE=4 SV=1 - [A2ABY3_MOUSE]                                  | 43.52 | 2 | 17 | 17 | 75  | 1.394 | 0.822 | 1.067 | 1.119 | 210.51 | 43.52 | 30 | 75  | 386  | 43.4  | 6.73  |
| Q80US4-3 | Isoform 3 of Actin-related protein 5 OS=Mus musculus GN=Actr5 - [ARPS_MOUSE]                                                   | 12.03 | 2 | 2  | 2  | 8   | 0.689 | 1.000 | 0.854 | 1.119 | 19.23  | 12.03 | 3  | 8   | 266  | 28.9  | 6.86  |
| F8WJ74   | GRAM domain-containing protein 1A OS=Mus musculus GN=Gramd1a PE=2 SV=1 - [F8WJ74_MOUSE]                                        | 10.47 | 4 | 5  | 5  | 19  | 1.135 | 1.006 | 1.006 | 1.120 | 70.43  | 10.47 | 10 | 19  | 688  | 76.5  | 6.80  |
| Q99K70   | Ras-related GTP-binding protein C OS=Mus musculus GN=Rragc PE=2 SV=1 - [RRAGC_MOUSE]                                           | 26.63 | 2 | 6  | 8  | 25  | 1.014 | 0.985 | 1.057 | 1.120 | 81.92  | 26.63 | 15 | 25  | 398  | 44.1  | 5.10  |
| E9QP44   | Art-GAP with Rho-GAP domain, ANK repeat and PH domain-containing protein 2 OS=Mus musculus GN=Arpp2 PE=2 SV=1 - [E9QP44_MOUSE] | 3.17  | 4 | 5  | 5  | 5   | 0.895 | 0.768 | 1.116 | 1.120 | 10.22  | 3.17  | 5  | 5   | 1703 | 193.3 | 7.17  |
| Q3U7U3   | F-box only protein 7 OS=Mus musculus GN=Fbxo7 PE=2 SV=2 - [FBX7_MOUSE]                                                         | 12.24 | 5 | 4  | 4  | 14  | 1.285 | 1.184 | 1.186 | 1.120 | 35.33  | 12.24 | 8  | 14  | 523  | 57.6  | 5.83  |
| Q9D967   | Magnesium-dependent phosphatase 1 OS=Mus musculus GN=Mdp1 PE=1 SV=1 - [MGDP1_MOUSE]                                            | 47.56 | 1 | 7  | 7  | 24  | 1.109 | 1.200 | 0.989 | 1.120 | 90.82  | 47.56 | 13 | 24  | 164  | 18.6  | 6.80  |
| Q9CQZ5   | NADH dehydrogenase [ubiquinone] 1 alpha subcomplex subunit 6 OS=Mus musculus GN=Ndufa6 PE=1 SV=1 - [NDUFA6_MOUSE]              | 44.27 | 1 | 6  | 6  | 37  | 0.467 | 0.978 | 1.037 | 1.120 | 101.45 | 44.27 | 10 | 37  | 131  | 15.3  | 10.11 |
| F7BTZ2   | Protein PML (Fragment) OS=Mus musculus GN=Pml PE=4 SV=1 - [F7BTZ2_MOUSE]                                                       | 7.79  | 6 | 3  | 3  | 5   | 0.957 | 1.524 | 0.777 | 1.120 | 14.99  | 7.79  | 5  | 5   | 578  | 64.6  | 5.07  |
| Q8C799   | Uncharacterized protein (Fragment) OS=Mus musculus GN=D330020A13Rik PE=2 SV=1 - [Q8C799_MOUSE]                                 | 9.95  | 1 | 1  | 1  | 3   | 1.208 | 0.955 | 1.707 | 1.120 | 3.88   | 9.95  | 1  | 3   | 211  | 22.6  | 11.43 |

|          |                                                                                                                     |       |   |    |    |      |       |        |       |       |         |       |    |      |      |       |      |
|----------|---------------------------------------------------------------------------------------------------------------------|-------|---|----|----|------|-------|--------|-------|-------|---------|-------|----|------|------|-------|------|
| E9Q0D4   | Protein Sbf2 OS=Mus musculus GN=Sbf2 PE=2 SV=1 - [E9Q0D4_MOUSE]                                                     | 11.39 | 6 | 13 | 16 | 35   | 0.905 | 0.941  | 1.096 | 1.120 | 74.27   | 11.39 | 26 | 35   | 1826 | 204.9 | 7.37 |
| Q6PDI6   | Protein FAM63B OS=Mus musculus GN=Fam63b PE=1 SV=1 - [FAM63B_MOUSE]                                                 | 21.13 | 3 | 8  | 9  | 30   | 1.272 | 1.215  | 1.339 | 1.120 | 85.14   | 21.13 | 16 | 30   | 601  | 65.6  | 4.63 |
| Q61703   | Inter-alpha-trypsin inhibitor heavy chain H2 OS=Mus musculus GN=Ith2 PE=1 SV=1 - [ITH2_MOUSE]                       | 13.64 | 3 | 11 | 11 | 26   | 1.777 | 1.979  | 0.605 | 1.120 | 68.54   | 13.64 | 19 | 26   | 946  | 105.9 | 7.27 |
| Q3UGR5   | Haloacid dehalogenase-like hydrolase domain-containing protein 2 OS=Mus musculus GN=Hdh2 PE=1 SV=2 - [HDHD2_MOUSE]  | 84.56 | 4 | 14 | 15 | 78   | 2.077 | 1.011  | 0.905 | 1.121 | 221.72  | 84.56 | 28 | 78   | 259  | 28.7  | 6.05 |
| F6UII7   | Poliovirus receptor-related protein 3 (Fragment) OS=Mus musculus GN=Pvr3 PE=4 SV=1 - [F6UII7_MOUSE]                 | 14.75 | 2 | 2  | 2  | 2    | 0.771 | 1.611  | 1.076 | 1.121 | 2.54    | 14.75 | 2  | 2    | 122  | 13.2  | 9.76 |
| Q9EQ32-2 | Isoform 2 of Phosphoinositide 3-kinase adapter protein 1 OS=Mus musculus GN=PIK3ap1 - [BCAP_MOUSE]                  | 4.11  | 2 | 1  | 1  | 2    | 0.927 | 0.979  | 0.911 | 1.121 | 6.96    | 4.11  | 2  | 2    | 632  | 70.8  | 5.48 |
| P02088   | Hemoglobin subunit beta-1 OS=Mus musculus GN=Hbb-b1 PE=1 SV=2 - [HBB1_MOUSE]                                        | 85.03 | 1 | 3  | 14 | 2055 | 1.455 | 11.761 | 1.046 | 1.121 | 6554.71 | 85.03 | 28 | 2055 | 147  | 15.8  | 7.65 |
| J3QPUI9  | Protein Zfp853 OS=Mus musculus GN=Zfp853 PE=4 SV=1 - [J3QPUI9_MOUSE]                                                | 1.69  | 1 | 1  | 1  | 1    | 0.726 | 1.070  | 1.052 | 1.121 | 2.31    | 1.69  | 1  | 1    | 652  | 75.0  | 6.18 |
| F6V3Y9   | Autophagy-related protein 2 homolog A (Fragment) OS=Mus musculus GN=Atg2a PE=4 SV=1 - [F6V3Y9_MOUSE]                | 8.09  | 2 | 10 | 11 | 24   | 0.617 | 0.859  | 1.172 | 1.121 | 61.34   | 8.09  | 15 | 24   | 1718 | 188.6 | 6.20 |
| Q99K46   | Ubiquitin carboxyl-terminal hydrolase 11 OS=Mus musculus GN=Usp11 PE=2 SV=4 - [UBP11_MOUSE]                         | 25.30 | 1 | 17 | 18 | 57   | 0.804 | 1.689  | 1.052 | 1.121 | 159.57  | 25.30 | 31 | 57   | 921  | 105.3 | 4.96 |
| Q64332-2 | Isoform Iib of Synapsin-2 OS=Mus musculus GN=Syn2 - [SYN2_MOUSE]                                                    | 66.39 | 1 | 1  | 24 | 643  | 0.915 | 1.029  | 1.064 | 1.121 | 1990.22 | 66.39 | 45 | 643  | 479  | 52.4  | 7.72 |
| G3XBU3   | MCG6895 OS=Mus musculus GN=2210016F16Rik PE=4 SV=1 - [G3XBU3_MOUSE]                                                 | 18.05 | 1 | 6  | 6  | 13   | 0.823 | 1.116  | 0.777 | 1.121 | 34.28   | 18.05 | 9  | 13   | 338  | 38.6  | 5.64 |
| Q9WVS7-2 | Isoform 2 of Dual specificity mitogen-activated protein kinase kinase 5 OS=Mus musculus GN=Map2k5 - [MAP2K5_MOUSE]  | 20.05 | 4 | 6  | 6  | 20   | 0.883 | 1.031  | 1.057 | 1.121 | 57.41   | 20.05 | 12 | 20   | 439  | 49.1  | 6.20 |
| Q6PB70   | Anoctamin-8 OS=Mus musculus GN=Ano8 PE=2 SV=3 - [ANOB_MOUSE]                                                        | 11.51 | 2 | 10 | 10 | 21   | 0.722 | 0.753  | 0.797 | 1.121 | 57.16   | 11.51 | 15 | 21   | 1060 | 119.0 | 5.74 |
| Q80XQ2   | TBC1 domain family member 5 OS=Mus musculus GN=Tbc1d5 PE=1 SV=2 - [TBC1D5_MOUSE]                                    | 24.66 | 1 | 14 | 14 | 42   | 1.006 | 0.797  | 1.222 | 1.121 | 123.85  | 24.66 | 24 | 42   | 815  | 91.8  | 6.79 |
| Q9D720   | Non-structural maintenance of chromosomes element 1 homolog OS=Mus musculus GN=Nsmce1 PE=1 SV=1 - [NSMCE1_MOUSE]    | 7.52  | 3 | 2  | 2  | 3    | 0.951 | 1.093  | 0.837 | 1.121 | 5.51    | 7.52  | 3  | 3    | 266  | 30.7  | 6.89 |
| Q8R1X6   | Spartin OS=Mus musculus GN=Spg20 PE=2 SV=1 - [SPG20_MOUSE]                                                          | 29.81 | 5 | 18 | 19 | 56   | 1.205 | 0.863  | 0.975 | 1.121 | 154.05  | 29.81 | 32 | 56   | 671  | 72.6  | 5.86 |
| E9Q6C8   | XK-related protein 6 OS=Mus musculus GN=Xkr6 PE=2 SV=1 - [XKR6_MOUSE]                                               | 9.40  | 5 | 4  | 4  | 16   | 0.954 | 0.767  | 0.758 | 1.121 | 61.38   | 9.40  | 7  | 16   | 638  | 70.9  | 7.97 |
| O55131   | Septin-7 OS=Mus musculus GN=Sept7 PE=1 SV=1 - [SEPT7_MOUSE]                                                         | 64.68 | 3 | 1  | 28 | 542  | 0.712 | 0.777  | 1.119 | 1.121 | 1637.52 | 64.68 | 51 | 542  | 436  | 50.5  | 8.57 |
| P27600   | Guanine nucleotide-binding protein subunit alpha-12 OS=Mus musculus GN=Gna12 PE=1 SV=3 - [GNA12_MOUSE]              | 26.12 | 3 | 9  | 11 | 99   | 0.596 | 0.438  | 0.779 | 1.121 | 246.86  | 26.12 | 20 | 99   | 379  | 44.1  | 9.83 |
| Q8C6G1   | Protein C21orf2 homolog OS=Mus musculus PE=2 SV=1 - [CU002_MOUSE]                                                   | 18.07 | 2 | 4  | 4  | 13   | 1.058 | 1.156  | 1.026 | 1.121 | 35.50   | 18.07 | 8  | 13   | 249  | 28.2  | 6.93 |
| Q8BGX2   | Uncharacterized protein C19orf52 homolog OS=Mus musculus PE=2 SV=1 - [CS052_MOUSE]                                  | 23.31 | 1 | 4  | 4  | 19   | 0.878 | 1.258  | 0.971 | 1.122 | 48.30   | 23.31 | 8  | 19   | 266  | 29.4  | 6.73 |
| Q9DCS9   | NADH dehydrogenase [ubiquinone] 1 beta subcomplex subunit 10 OS=Mus musculus GN=Ndufb10 PE=1 SV=3 - [NDUFB10_MOUSE] | 49.43 | 2 | 9  | 9  | 75   | 1.401 | 1.362  | 1.136 | 1.122 | 227.14  | 49.43 | 18 | 75   | 176  | 21.0  | 8.03 |
| Q80YD1   | ATP-dependent RNA helicase SUP31, mitochondrial OS=Mus musculus GN=Sup31 PE=2 SV=1 - [SUP31_MOUSE]                  | 22.08 | 2 | 16 | 16 | 37   | 0.770 | 0.912  | 1.057 | 1.122 | 115.44  | 22.08 | 26 | 37   | 779  | 87.0  | 7.84 |

|          |                                                                                                                         |       |    |    |    |     |       |       |       |       |         |       |    |     |      |       |      |
|----------|-------------------------------------------------------------------------------------------------------------------------|-------|----|----|----|-----|-------|-------|-------|-------|---------|-------|----|-----|------|-------|------|
| Q66JZ4   | T-cell activation inhibitor, mitochondrial OS=Mus musculus GN=TCAIM PE=2 SV=1 - [TCAIM_MOUSE]                           | 8.42  | 3  | 3  | 3  | 5   | 0.632 | 0.623 | 0.995 | 1.122 | 10.85   | 8.42  | 4  | 5   | 499  | 57.4  | 9.25 |
| Q3UED7   | Interferon-gamma-inducible GTPase Ifiga2 protein OS=Mus musculus GN=Gm4951 PE=2 SV=1 - [Q3UED7_MOUSE]                   | 5.42  | 1  | 1  | 2  | 4   | 0.630 | 0.819 | 1.106 | 1.122 | 11.81   | 5.42  | 2  | 4   | 406  | 47.2  | 5.71 |
| Q9CZ52   | Anthrax toxin receptor 1 OS=Mus musculus GN=Antxr1 PE=2 SV=2 - [ANTR1_MOUSE]                                            | 6.94  | 2  | 3  | 3  | 8   | 1.117 | 0.752 | 0.661 | 1.122 | 20.51   | 6.94  | 5  | 8   | 562  | 62.3  | 7.61 |
| Q8BLN6   | Protein unc-80 homolog OS=Mus musculus GN=Unc80 PE=1 SV=2 - [UNC80_MOUSE]                                               | 8.31  | 5  | 17 | 18 | 37  | 0.767 | 0.923 | 0.895 | 1.122 | 99.56   | 8.31  | 29 | 37  | 3261 | 363.3 | 6.89 |
| E9PXM6   | Equilibrative nucleoside transporter 1 OS=Mus musculus GN=Slc29a1 PE=2 SV=1 -                                           | 7.82  | 11 | 3  | 3  | 12  | 0.698 | 0.802 | 0.905 | 1.122 | 36.40   | 7.82  | 6  | 12  | 358  | 38.9  | 7.15 |
| P17751   | Triosephosphate isomerase OS=Mus musculus GN=Tp1i PE=1 SV=4 - [TPIS_MOUSE]                                              | 60.54 | 2  | 16 | 16 | 812 | 1.490 | 1.143 | 1.346 | 1.122 | 2513.86 | 60.54 | 31 | 812 | 299  | 32.2  | 5.74 |
| P17012   | Zinc finger X-chromosomal protein OS=Mus musculus GN=Zfx PE=1 SV=2 - [ZFX_MOUSE]                                        | 1.25  | 1  | 1  | 1  | 1   | 1.895 | 1.238 | 1.408 | 1.122 | 1.98    | 1.25  | 1  | 1   | 799  | 90.0  | 6.19 |
| Q5DTZ0   | Protein NYNRIN OS=Mus musculus GN=Nynrin PE=1 SV=2 - [NYNR1_MOUSE]                                                      | 5.38  | 1  | 5  | 5  | 7   | 0.906 | 0.865 | 0.697 | 1.122 | 8.02    | 5.38  | 6  | 7   | 1840 | 202.9 | 6.99 |
| Q3U0M1   | Trafficking protein particle complex subunit 9 OS=Mus musculus GN=Trappc9 PE=1 SV=2 - [TPPC9_MOUSE]                     | 21.95 | 7  | 26 | 26 | 72  | 0.599 | 1.068 | 0.948 | 1.122 | 214.75  | 21.95 | 46 | 72  | 1148 | 128.2 | 6.47 |
| Q3U186   | Probable arginine-tRNA ligase, mitochondrial OS=Mus musculus GN=Rars2 PE=2 SV=1 - [SYRM_MOUSE]                          | 28.37 | 2  | 15 | 15 | 31  | 1.092 | 1.174 | 1.044 | 1.122 | 77.92   | 28.37 | 24 | 31  | 578  | 65.3  | 8.02 |
| Q9EQJ0   | Two pore calcium channel protein 1 OS=Mus musculus GN=Tpcn1 PE=2 SV=1 - [TPCL_MOUSE]                                    | 3.67  | 1  | 3  | 3  | 8   | 0.702 | 1.210 | 1.049 | 1.122 | 25.78   | 3.67  | 4  | 8   | 817  | 94.4  | 8.53 |
| E9Q296   | Acyl-coenzyme A oxidase OS=Mus musculus GN=Acox3 PE=2 SV=1 - [E9Q296_MOUSE]                                             | 17.31 | 1  | 1  | 10 | 24  | 0.949 | 0.589 | 0.660 | 1.122 | 54.19   | 17.31 | 16 | 24  | 728  | 81.2  | 6.86 |
| Q9JIY0   | Pleckstrin homology domain-containing family O member 1 OS=Mus musculus GN=Plekho1 PE=1 SV=1 - [PLEKH1_MOUSE]           | 10.05 | 3  | 3  | 4  | 8   | 0.982 | 0.645 | 1.123 | 1.122 | 6.86    | 10.05 | 6  | 8   | 408  | 46.0  | 8.97 |
| Q8C4G9   | MCG216Z3, isoform CRA_b OS=Mus musculus GN=Gpr123 PE=2 SV=1 - [Q8C4G9_MOUSE]                                            | 7.61  | 1  | 4  | 4  | 16  | 0.797 | 0.948 | 1.024 | 1.123 | 35.10   | 7.61  | 7  | 16  | 578  | 63.5  | 7.43 |
| Q8VE85   | Protein slowmo homolog 1 OS=Mus musculus GN=Slmo1 PE=2 SV=1 - [SLMO1_MOUSE]                                             | 33.14 | 1  | 5  | 5  | 12  | 0.726 | 0.975 | 1.116 | 1.123 | 35.49   | 33.14 | 9  | 12  | 172  | 19.0  | 7.91 |
| Q9JJA9   | General receptor for phosphoinositides 1-associated scaffold protein OS=Mus musculus GN=Grasp PE=1 SV=2 - [GRASP_MOUSE] | 20.41 | 1  | 4  | 5  | 8   | 1.128 | 3.013 | 2.699 | 1.123 | 26.31   | 20.41 | 6  | 8   | 392  | 42.3  | 9.10 |
| Q8BHL5-2 | Isoform 2 of Engulfment and cell motility protein 2 OS=Mus musculus GN=Elmo2 - [ELMO2_MOUSE]                            | 31.67 | 6  | 15 | 21 | 78  | 0.900 | 1.666 | 1.257 | 1.123 | 222.51  | 31.67 | 36 | 78  | 720  | 82.5  | 5.96 |
| E9QN52   | Leucine-rich repeat flightless-interacting protein 2 OS=Mus musculus GN=Lrrfp2 PE=2 SV=1 -                              | 38.07 | 3  | 13 | 14 | 79  | 2.036 | 0.654 | 1.467 | 1.123 | 214.55  | 38.07 | 24 | 79  | 415  | 47.1  | 5.68 |
| Q9JLV5   | Cullin-3 OS=Mus musculus GN=Cul3 PE=1 SV=1 - [CUL3_MOUSE]                                                               | 42.45 | 5  | 29 | 29 | 147 | 0.664 | 1.055 | 0.951 | 1.123 | 389.60  | 42.45 | 54 | 147 | 768  | 88.9  | 8.46 |
| Q9JIS9   | Junctional adhesion molecule B OS=Mus musculus GN=Jam2 PE=1 SV=1 - [JAM2_MOUSE]                                         | 23.15 | 2  | 7  | 7  | 19  | 1.167 | 1.239 | 1.068 | 1.123 | 44.11   | 23.15 | 12 | 19  | 298  | 33.0  | 8.40 |
| Q8CI75   | DIS3-like exonuclease 2 OS=Mus musculus GN=Dis3l2 PE=1 SV=1 - [DISL2_MOUSE]                                             | 18.97 | 2  | 16 | 17 | 48  | 0.892 | 0.908 | 1.166 | 1.123 | 155.83  | 18.97 | 31 | 48  | 870  | 97.7  | 5.90 |
| Q8R1H0   | Homeodomain-only protein OS=Mus musculus GN=Hopx PE=1 SV=1 - [HOP_MOUSE]                                                | 12.33 | 1  | 1  | 1  | 8   | 2.555 | 1.325 | 1.601 | 1.123 | 20.97   | 12.33 | 2  | 8   | 73   | 8.3   | 4.88 |
| D3YUC0   | DNA ligase (Fragment) OS=Mus musculus GN=Lig1 PE=3 SV=1 - [D3YUC0_MOUSE]                                                | 2.47  | 3  | 1  | 2  | 5   | 1.222 | 0.967 | 0.981 | 1.123 | 12.69   | 2.47  | 3  | 5   | 687  | 76.3  | 8.54 |
| Q9QX96   | Sal-like protein 2 OS=Mus musculus GN=Sal2 PE=2 SV=2 - [SALL2_MOUSE]                                                    | 2.79  | 2  | 1  | 1  | 4   | 0.933 | 0.744 | 1.183 | 1.123 | 10.35   | 2.79  | 2  | 4   | 1004 | 104.9 | 6.28 |
| Q8CCM6-2 | Isoform 2 of Mitochondrial import inner membrane translocase subunit Tim21 OS=Mus musculus GN=Timm21 - [TIMM21_MOUSE]   | 18.03 | 3  | 3  | 3  | 8   | 1.265 | 1.173 | 0.994 | 1.123 | 22.75   | 18.03 | 6  | 8   | 244  | 27.9  | 9.95 |

|          |                                                                                                        |       |   |    |    |      |       |       |       |       |          |       |     |      |      |       |       |
|----------|--------------------------------------------------------------------------------------------------------|-------|---|----|----|------|-------|-------|-------|-------|----------|-------|-----|------|------|-------|-------|
| P0C605-2 | Isoform Beta of cGMP-dependent protein kinase 1 OS=Mus musculus GN=Prkg1 -                             | 13.56 | 1 | 3  | 7  | 22   | 0.689 | 2.371 | 0.919 | 1.123 | 59.87    | 13.56 | 12  | 22   | 686  | 77.7  | 5.44  |
| Q52425   | NADH dehydrogenase [ubiquinone] 1 alpha subcomplex subunit 4 OS=Mus musculus GN=Ndufa4 PE=1 SV=2 -     | 41.46 | 1 | 5  | 5  | 93   | 0.801 | 0.979 | 1.058 | 1.123 | 217.88   | 41.46 | 9   | 93   | 82   | 9.3   | 9.52  |
| Q9D273   | CoX(D)ytic acid a,c-diamide adenosyltransferase, mitochondrial OS=Mus musculus GN=Mmab PE=2 SV=1 -     | 59.07 | 3 | 11 | 11 | 35   | 1.428 | 1.315 | 1.026 | 1.123 | 103.96   | 59.07 | 21  | 35   | 237  | 26.3  | 9.20  |
| Q8CFR5   | Dystrobrevin alpha OS=Mus musculus GN=Dtna PE=2 SV=1 -                                                 | 32.40 | 9 | 12 | 16 | 96   | 0.870 | 1.168 | 1.142 | 1.123 | 289.95   | 32.40 | 30  | 96   | 682  | 76.9  | 6.89  |
| E9QNP0   | Kxdl motif-containing protein 1 OS=Mus musculus GN=Kxd1 PE=2 SV=1 -                                    | 45.69 | 9 | 4  | 14 | 386  | 1.002 | 1.345 | 0.968 | 1.123 | 939.67   | 45.69 | 26  | 386  | 232  | 26.8  | 9.83  |
| Q7TQI3   | Ubiquitin thioesterase OTUB1 OS=Mus musculus GN=Otub1 PE=1 SV=2 -                                      | 62.73 | 3 | 13 | 13 | 121  | 0.924 | 1.257 | 1.084 | 1.123 | 388.81   | 62.73 | 22  | 121  | 271  | 31.3  | 4.94  |
| P22437   | Prostaglandin G/H synthase 1 OS=Mus musculus GN=Ptgs1 PE=2 SV=1 -                                      | 14.45 | 1 | 6  | 7  | 15   | 1.256 | 1.570 | 1.101 | 1.124 | 33.83    | 14.45 | 11  | 15   | 602  | 69.0  | 6.83  |
| F8WGM8   | Actin, cytoplasmic 2 (Fragment) OS=Mus musculus GN=Actg1 PE=2 SV=1 -                                   | 87.62 | 1 | 1  | 8  | 650  | 2.620 | 2.775 | 1.096 | 1.124 | 2589.54  | 87.62 | 15  | 650  | 105  | 11.9  | 7.21  |
| Q8R242   | Di-N-acetylchitobiase OS=Mus musculus GN=Ctbs PE=2 SV=2 -                                              | 11.75 | 2 | 4  | 4  | 13   | 1.556 | 1.374 | 1.287 | 1.124 | 32.24    | 11.75 | 6   | 13   | 366  | 41.3  | 5.60  |
| Q5SSM3   | Rho GTPase-activating protein 44 OS=Mus musculus GN=Arhgap44 PE=2 SV=1 -                               | 38.33 | 5 | 24 | 25 | 130  | 1.012 | 1.212 | 1.202 | 1.124 | 324.51   | 38.33 | 42  | 130  | 814  | 88.9  | 6.60  |
| Q8VD24   | Zinc finger CCHC domain-containing protein 18 OS=Mus musculus GN=Zcchc18 PE=2 SV=1 -                   | 10.18 | 1 | 3  | 3  | 5    | 0.963 | 1.085 | 0.805 | 1.124 | 19.74    | 10.18 | 5   | 5    | 393  | 43.9  | 5.38  |
| Q04690-2 | Isoform 1 of Neurofibromin OS=Mus musculus GN=Nf1 -                                                    | 28.55 | 5 | 66 | 67 | 207  | 0.601 | 0.840 | 0.896 | 1.124 | 576.68   | 28.55 | 113 | 207  | 2820 | 317.0 | 7.27  |
| P60766   | Cell division control protein 42 homolog OS=Mus musculus GN=Cdc42 PE=1 SV=2 -                          | 53.40 | 7 | 1  | 7  | 121  | 1.970 | 1.012 | 1.145 | 1.124 | 286.53   | 53.40 | 13  | 121  | 191  | 21.2  | 6.55  |
| P19788   | Matrix Gla protein OS=Mus musculus GN=Mgp PE=2 SV=1 -                                                  | 10.58 | 1 | 1  | 1  | 3    | 1.056 | 1.056 | 1.192 | 1.124 | 7.06     | 10.58 | 2   | 3    | 104  | 12.4  | 9.55  |
| Q9ERD7   | Tubulin beta-3 chain OS=Mus musculus GN=Tubb3 PE=1 SV=1 -                                              | 77.33 | 1 | 12 | 28 | 3849 | 0.830 | 0.965 | 1.025 | 1.124 | 10640.96 | 77.33 | 52  | 3849 | 450  | 50.4  | 4.93  |
| Q3UPE3-2 | Isoform 2 of RecQ-mediated genome instability protein 2 OS=Mus musculus GN=Rmi2 -                      | 4.83  | 2 | 1  | 1  | 3    | 1.023 | 0.868 | 1.339 | 1.124 | 6.16     | 4.83  | 2   | 3    | 145  | 15.4  | 10.76 |
| Q8CB27   | Ubiquitin thioesterase OTU1 OS=Mus musculus GN=Yod1 PE=1 SV=1 -                                        | 5.25  | 1 | 1  | 1  | 2    | 0.911 | 2.282 | 1.021 | 1.125 | 9.33     | 5.25  | 2   | 2    | 343  | 37.5  | 5.76  |
| O09118   | Netrin-1 OS=Mus musculus GN=Ntn1 PE=1 SV=3 -                                                           | 2.48  | 1 | 1  | 1  | 4    | 1.519 | 1.099 | 0.901 | 1.125 | 12.77    | 2.48  | 2   | 4    | 604  | 67.8  | 8.78  |
| Q8BHA3   | Probable D-tyrosyl-tRNA(Tyr) deacylase 2 OS=Mus musculus GN=Dtd2 PE=2 SV=1 -                           | 28.57 | 2 | 4  | 4  | 10   | 2.116 | 1.165 | 1.123 | 1.125 | 20.28    | 28.57 | 6   | 10   | 168  | 18.2  | 7.91  |
| Q9D6U8   | Protein FAM162A OS=Mus musculus GN=Fam162a PE=2 SV=1 -                                                 | 32.90 | 1 | 6  | 6  | 19   | 1.035 | 1.318 | 1.105 | 1.125 | 71.23    | 32.90 | 10  | 19   | 155  | 17.7  | 9.88  |
| E9QKX5   | Vacuolar protein sorting-associated protein 13B OS=Mus musculus GN=Vps13b PE=4 SV=1 -                  | 2.10  | 2 | 5  | 5  | 6    | 1.026 | 1.113 | 1.221 | 1.125 | 11.49    | 2.10  | 6   | 6    | 3993 | 443.7 | 6.46  |
| Q6PDG8-2 | Isoform 2 of Vacuolar fusion protein MON1 homolog A OS=Mus musculus GN=Mon1a -                         | 19.31 | 2 | 6  | 6  | 23   | 0.990 | 1.156 | 1.146 | 1.125 | 74.84    | 19.31 | 11  | 23   | 461  | 51.1  | 6.06  |
| P11531   | Dystrophin OS=Mus musculus GN=Dmd PE=1 SV=3 -                                                          | 11.61 | 3 | 32 | 38 | 133  | 1.171 | 1.092 | 1.173 | 1.125 | 361.77   | 11.61 | 65  | 133  | 3678 | 425.6 | 5.94  |
| Q66GT5   | Phosphatidyglycerophosphatase and protein-tyrosine phosphatase 1 OS=Mus musculus GN=Ptpmt1 PE=1 SV=1 - | 25.39 | 2 | 4  | 4  | 12   | 0.812 | 0.937 | 1.119 | 1.125 | 38.21    | 25.39 | 7   | 12   | 193  | 21.9  | 9.72  |

|          |                                                                                                                              |       |   |    |    |     |       |       |       |       |        |       |    |     |      |       |       |
|----------|------------------------------------------------------------------------------------------------------------------------------|-------|---|----|----|-----|-------|-------|-------|-------|--------|-------|----|-----|------|-------|-------|
| Q8K3R3-2 | Isoform 2 of 1-phosphatidylinositol 4,5-bisphosphate phosphodiesterase delta-4 OS=Mus musculus GN=Plcd4 - [PLCD4_MOUSE]      | 6.97  | 5 | 5  | 5  | 8   | 1.718 | 0.982 | 0.838 | 1.125 | 17.90  | 6.97  | 7  | 8   | 775  | 89.2  | 5.07  |
| Q3UMF0-3 | Isoform 3 of Cordon-bleu protein-like 1 OS=Mus musculus GN=Cobl1 - [COBL1_MOUSE]                                             | 22.88 | 4 | 1  | 20 | 74  | 1.607 | 0.628 | 1.215 | 1.125 | 226.96 | 22.88 | 34 | 74  | 1202 | 129.4 | 7.88  |
| E9Q2I4   | Uncharacterized protein OS=Mus musculus GN=Eimsan1 PE=4 SV=1 - [E9Q2I4_MOUSE]                                                | 2.66  | 1 | 2  | 2  | 5   | 1.167 | 1.113 | 1.227 | 1.125 | 16.12  | 2.66  | 3  | 5   | 1089 | 119.6 | 9.19  |
| D3Z1B6   | Regulator of G-protein-signaling 10 (Fragment) OS=Mus musculus GN=Rgs10 PE=2 SV=1 - [D3Z1B6_MOUSE]                           | 38.82 | 1 | 1  | 2  | 7   | 1.873 | 1.411 | 1.555 | 1.125 | 27.96  | 38.82 | 4  | 7   | 85   | 9.7   | 4.91  |
| Q5PR72   | Phosphodiesterase 2A, cGMP-stimulated OS=Mus musculus GN=Pde2a PE=2 SV=1 - [Q5PR72_MOUSE]                                    | 47.91 | 3 | 38 | 38 | 174 | 0.492 | 1.866 | 1.448 | 1.125 | 489.83 | 47.91 | 64 | 174 | 935  | 105.2 | 5.41  |
| Q8BHN7-2 | Isoform 2 of Uncharacterized protein C12orf29 homolog OS=Mus musculus - [Q8BHN7_MOUSE]                                       | 11.72 | 2 | 3  | 3  | 3   | 1.184 | 1.019 | 0.974 | 1.125 | 7.45   | 11.72 | 3  | 3   | 273  | 31.0  | 7.49  |
| B7ZCR6   | Protein Znf512b OS=Mus musculus GN=Znf512b PE=2 SV=1 - [B7ZCR6_MOUSE]                                                        | 4.03  | 3 | 2  | 3  | 6   | 2.568 | 1.037 | 1.478 | 1.125 | 5.54   | 4.03  | 4  | 6   | 869  | 95.3  | 9.77  |
| G3XA50   | MCGS1226 OS=Mus musculus GN=Lrrc10b PE=4 SV=1 - [G3XA50_MOUSE]                                                               | 6.51  | 1 | 1  | 2  | 2   | 1.488 | 1.133 | 2.395 | 1.126 | 4.80   | 6.51  | 2  | 2   | 292  | 33.0  | 7.36  |
| Q3UP23   | Transmembrane protein 26 OS=Mus musculus GN=Tmem26 PE=2 SV=2 - [TMM26_MOUSE]                                                 | 3.55  | 1 | 1  | 1  | 1   | 0.822 | 1.522 | 1.016 | 1.126 | 0.00   | 3.55  | 1  | 1   | 366  | 41.6  | 7.58  |
| Q61738-4 | Isoform Alpha-7X2A of Integrin alpha-7 OS=Mus musculus GN=Itga7 - [ITA7_MOUSE]                                               | 9.95  | 7 | 11 | 11 | 27  | 1.006 | 1.651 | 0.952 | 1.126 | 54.76  | 9.95  | 18 | 27  | 1116 | 122.1 | 6.00  |
| Q6PH56   | Sorting nexin-13 OS=Mus musculus GN=Snx13 PE=2 SV=1 - [SNX13_MOUSE]                                                          | 7.94  | 3 | 7  | 7  | 14  | 0.623 | 0.933 | 0.883 | 1.126 | 46.40  | 7.94  | 12 | 14  | 957  | 110.7 | 6.62  |
| E0CYK3   | Protein RRNAD1 OS=Mus musculus GN=Rmad1 PE=2 SV=1 - [E0CYK3_MOUSE]                                                           | 27.80 | 1 | 2  | 3  | 3   | 0.723 | 0.643 | 0.921 | 1.126 | 2.53   | 27.80 | 3  | 3   | 277  | 30.1  | 9.16  |
| Q8VC30   | Bifunctional ATP-dependent dihydroxyacetone kinase/FAD-AMP lyase (cyclizing) OS=Mus musculus GN=Dak PE=2 SV=1 - [DHAK_MOUSE] | 36.33 | 1 | 15 | 15 | 52  | 0.697 | 0.848 | 0.963 | 1.126 | 141.12 | 36.33 | 26 | 52  | 578  | 59.7  | 6.92  |
| Q3TZU5   | Protein kinase inhibitor beta, cAMP dependent, testis specific, isoform CRA_c OS=Mus musculus GN=Pkb PE=4 SV=1 - [Pkb_MOUSE] | 53.85 | 4 | 2  | 2  | 5   | 1.646 | 1.548 | 1.550 | 1.126 | 19.42  | 53.85 | 3  | 5   | 78   | 8.3   | 5.15  |
| Q80X85   | 28S ribosomal protein S7, mitochondrial OS=Mus musculus GN=Mps7 PE=2 SV=1 - [RT07_MOUSE]                                     | 14.88 | 1 | 3  | 3  | 9   | 0.585 | 0.904 | 0.936 | 1.126 | 33.73  | 14.88 | 6  | 9   | 242  | 28.0  | 9.94  |
| Q8BP47   | Asparagine-tRNA ligase, cytoplasmic OS=Mus musculus GN=Nars PE=1 SV=2 - [SYNC_MOUSE]                                         | 39.00 | 1 | 19 | 19 | 105 | 0.694 | 0.691 | 0.954 | 1.126 | 257.96 | 39.00 | 35 | 105 | 559  | 64.2  | 5.86  |
| Q8BFV2   | PCI domain-containing protein 2 OS=Mus musculus GN=Pcid2 PE=2 SV=1 - [PCID2_MOUSE]                                           | 20.30 | 3 | 7  | 7  | 13  | 1.143 | 1.012 | 1.153 | 1.126 | 28.36  | 20.30 | 11 | 13  | 399  | 46.1  | 8.53  |
| P59279   | Ras-related protein Rab-2B OS=Mus musculus GN=Rab2b PE=2 SV=1 - [RAB2B_MOUSE]                                                | 62.50 | 4 | 4  | 11 | 81  | 1.373 | 1.141 | 1.046 | 1.127 | 269.31 | 62.50 | 21 | 81  | 216  | 24.2  | 6.68  |
| Q9DCT1   | 1,5-anhydro-D-fructose reductase OS=Mus musculus GN=Akr1e2 PE=1 SV=1 - [AKR1E2_MOUSE]                                        | 42.19 | 2 | 12 | 13 | 46  | 0.849 | 1.088 | 1.081 | 1.127 | 110.84 | 42.19 | 23 | 46  | 301  | 34.4  | 7.33  |
| Q6P9N1   | Hyccin OS=Mus musculus GN=Fam126a PE=1 SV=2 - [HYCCI_MOUSE]                                                                  | 13.05 | 3 | 5  | 5  | 38  | 1.028 | 1.111 | 1.084 | 1.127 | 19.01  | 13.05 | 8  | 38  | 521  | 57.3  | 7.88  |
| Q6DFW0   | Protein C9orf72 homolog OS=Mus musculus PE=2 SV=1 - [CI072_MOUSE]                                                            | 7.38  | 3 | 4  | 4  | 10  | 0.572 | 1.111 | 0.892 | 1.127 | 24.00  | 7.38  | 6  | 10  | 420  | 47.3  | 5.67  |
| Q8K3V7   | UPF0258 protein KIAA1024 OS=Mus musculus GN=Kiaa1024 PE=2 SV=1 - [KIAA1024_MOUSE]                                            | 4.47  | 2 | 3  | 4  | 14  | 1.512 | 0.778 | 0.887 | 1.127 | 27.59  | 4.47  | 7  | 14  | 917  | 102.7 | 7.24  |
| Q9D0P0   | Enopamil-binding protein-like OS=Mus musculus GN=Ebpl PE=2 SV=1 - [EBPL_MOUSE]                                               | 4.37  | 1 | 1  | 1  | 1   | 4.146 | 1.108 | 1.399 | 1.127 | 2.71   | 4.37  | 1  | 1   | 206  | 23.3  | 6.89  |
| Q8R0K4   | Coiled-coil domain-containing protein 137 OS=Mus musculus GN=Ccdc137 PE=2 SV=1 - [CC137_MOUSE]                               | 7.59  | 1 | 1  | 2  | 2   | 9.261 | 0.560 | 1.570 | 1.127 | 5.62   | 7.59  | 2  | 2   | 290  | 32.9  | 10.68 |
| P63254   | Cysteine-rich protein 1 OS=Mus musculus GN=Crip1 PE=2 SV=2 - [CRIP1_MOUSE]                                                   | 32.47 | 1 | 3  | 4  | 20  | 1.266 | 2.989 | 0.987 | 1.127 | 47.92  | 32.47 | 7  | 20  | 77   | 8.5   | 8.57  |



|          |                                                                                                                            |       |    |    |    |     |        |       |       |       |        |       |    |     |      |       |      |
|----------|----------------------------------------------------------------------------------------------------------------------------|-------|----|----|----|-----|--------|-------|-------|-------|--------|-------|----|-----|------|-------|------|
| Q9D014   | Syntaxin-17 OS=Musculus GN=Sbx17 PE=1 SV=1 - [STX17_MOUSE]                                                                 | 15.28 | 2  | 1  | 5  | 14  | 1.341  | 0.905 | 0.915 | 1.127 | 38.76  | 15.28 | 8  | 14  | 301  | 33.2  | 6.74 |
| Q9CQ62   | 2,4-dienoyl-CoA reductase, mitochondrial OS=Musculus GN=Decr1 PE=1 SV=1 - [DECR_MOUSE]                                     | 29.25 | 1  | 10 | 10 | 55  | 1.050  | 1.081 | 0.903 | 1.127 | 175.97 | 29.25 | 18 | 55  | 335  | 36.2  | 8.95 |
| Q9Z1W9   | STE20/SPS1-related proline-alanine-rich protein kinase OS=Musculus GN=Sbk39 PE=1 SV=1 - [STK39_MOUSE]                      | 42.81 | 2  | 16 | 18 | 67  | 1.000  | 0.600 | 0.894 | 1.127 | 188.12 | 42.81 | 28 | 67  | 556  | 60.3  | 6.29 |
| E9PWX7   | TBC1 domain family member 25 OS=Musculus GN=Tbcd125 PE=2 SV=1 -                                                            | 1.52  | 2  | 1  | 1  | 2   | 1.135  | 1.265 | 0.940 | 1.127 | 7.24   | 1.52  | 2  | 2   | 723  | 80.2  | 6.37 |
| Q9EQC5   | N-terminal kinase-like protein OS=Musculus GN=Scyl1 PE=1 SV=1 - [NTKL_MOUSE]                                               | 20.47 | 1  | 13 | 13 | 35  | 0.779  | 0.841 | 1.003 | 1.128 | 104.58 | 20.47 | 21 | 35  | 806  | 89.1  | 6.44 |
| P07934   | Phosphorylase b kinase gamma catalytic chain, skeletal muscle/heart isoform OS=Musculus GN=Phkg1 PE=2 SV=3 - [PHKG1_MOUSE] | 27.58 | 3  | 9  | 10 | 17  | 1.182  | 1.190 | 0.927 | 1.128 | 46.75  | 27.58 | 14 | 17  | 388  | 44.9  | 6.55 |
| P56473   | Agouti-related protein OS=Musculus GN=AgRp PE=1 SV=1 - [AGRP_MOUSE]                                                        | 38.93 | 1  | 4  | 4  | 21  | 2.000  | 1.030 | 0.440 | 1.128 | 69.02  | 38.93 | 6  | 21  | 131  | 14.4  | 8.29 |
| A2AAE1-6 | isoform 6 of Uncharacterized protein KIAA1109 OS=Musculus GN=Kiaa1109 - [K1109_MOUSE]                                      | 7.26  | 10 | 31 | 32 | 64  | 1.016  | 1.026 | 1.144 | 1.128 | 162.83 | 7.26  | 47 | 64  | 4970 | 551.5 | 6.60 |
| P83093   | Stromal interaction molecule 2 OS=Musculus GN=Stim2 PE=1 SV=2 - [STIM2_MOUSE]                                              | 21.98 | 3  | 13 | 13 | 41  | 0.839  | 1.147 | 1.467 | 1.128 | 133.11 | 21.98 | 21 | 41  | 746  | 83.9  | 6.79 |
| O70325-2 | isoform Cytoplasmic of Phospholipid hydroperoxide glutathione peroxidase, mitochondrial OS=Musculus GN=Gpx4 - [GPX4_MOUSE] | 55.29 | 4  | 10 | 10 | 53  | 0.996  | 0.818 | 1.091 | 1.128 | 140.90 | 55.29 | 18 | 53  | 170  | 19.5  | 8.05 |
| Q9R1V4   | Disintegrin and metalloproteinase domain-containing protein 11 OS=Musculus GN=Adam11 PE=1 SV=2 - [ADAM11_MOUSE]            | 23.16 | 2  | 12 | 12 | 47  | 0.579  | 0.997 | 1.186 | 1.128 | 169.12 | 23.16 | 23 | 47  | 773  | 84.1  | 7.50 |
| Q9ER24   | Muscarinic acetylcholine receptor M2 OS=Musculus GN=Chrm2 PE=1 SV=2 -                                                      | 12.66 | 1  | 3  | 3  | 26  | 1.142  | 0.403 | 1.070 | 1.128 | 81.95  | 12.66 | 5  | 26  | 466  | 51.5  | 8.92 |
| Q9D920   | Loss of heterozygosity 12 chromosomal region 1 protein homolog OS=Musculus GN=Loh12cr1 PE=2 SV=1 - [L12R1_MOUSE]           | 51.28 | 2  | 9  | 9  | 36  | 1.294  | 1.225 | 1.003 | 1.128 | 108.88 | 51.28 | 16 | 36  | 195  | 22.1  | 6.55 |
| E9PX87   | E3 ubiquitin-protein ligase NEDD4-like OS=Musculus GN=Nedd4l PE=2 SV=1 -                                                   | 28.18 | 5  | 18 | 23 | 62  | 0.642  | 1.179 | 1.224 | 1.128 | 196.86 | 28.18 | 37 | 62  | 976  | 112.1 | 5.87 |
| Q8BL06   | Inactive ubiquitin carboxyl-terminal hydrolase 54 OS=Musculus GN=Usp54 PE=1 SV=2 - [UBP54_MOUSE]                           | 4.85  | 3  | 5  | 5  | 8   | 0.945  | 0.693 | 1.099 | 1.128 | 18.11  | 4.85  | 7  | 8   | 1588 | 176.6 | 7.62 |
| P70303   | CTP synthase 2 OS=Musculus GN=Ctps2 PE=1 SV=1 - [PYRG2_MOUSE]                                                              | 32.94 | 4  | 13 | 16 | 56  | 0.746  | 1.030 | 0.781 | 1.128 | 149.11 | 32.94 | 27 | 56  | 586  | 65.5  | 6.49 |
| P84075   | Neuron-specific calcium-binding protein hippocampal OS=Musculus GN=HpcA PE=1 SV=2 - [HPCA_MOUSE]                           | 66.84 | 4  | 5  | 14 | 241 | 0.799  | 0.978 | 2.211 | 1.129 | 637.82 | 66.84 | 26 | 241 | 193  | 22.4  | 4.97 |
| Q8CAQ8   | Mitochondrial inner membrane protein OS=Musculus GN=Immt PE=1 SV=1 - [IMMT_MOUSE]                                          | 69.48 | 2  | 2  | 53 | 307 | 1.047  | 1.174 | 1.274 | 1.129 | 933.41 | 69.48 | 95 | 307 | 757  | 83.8  | 6.61 |
| O54834-2 | isoform 2 of Rho GTPase-activating protein 6 OS=Musculus GN=Arhgap6 -                                                      | 15.76 | 7  | 7  | 7  | 16  | 0.867  | 2.165 | 1.060 | 1.129 | 45.36  | 15.76 | 12 | 16  | 660  | 72.7  | 8.88 |
| Q6ZPF4-2 | isoform 2 of Formin-like protein 3 OS=Musculus GN=Fmnl3 - [FMNL3_MOUSE]                                                    | 6.45  | 3  | 2  | 7  | 19  | 1.199  | 2.393 | 1.253 | 1.129 | 49.07  | 6.45  | 11 | 19  | 976  | 111.2 | 6.92 |
| Q2PZL6   | Protocadherin Fat 4 OS=Musculus GN=Fat4 PE=1 SV=2 - [FAT4_MOUSE]                                                           | 1.53  | 2  | 4  | 4  | 4   | 14.817 | 1.138 | 1.402 | 1.129 | 6.38   | 1.53  | 4  | 4   | 4981 | 540.0 | 4.91 |
| Q8C8R3-7 | isoform 7 of Ankyrin-2 OS=Musculus GN=Ank2 - [ANK2_MOUSE]                                                                  | 61.89 | 2  | 2  | 23 | 246 | 0.512  | 0.957 | 1.267 | 1.129 | 600.48 | 61.89 | 41 | 246 | 454  | 49.5  | 9.48 |
| Q9DCN1   | Peroxisomal NADH pyrophosphatase NUDT12 OS=Musculus GN=Nudt12 PE=2 SV=1 - [NUDT12_MOUSE]                                   | 13.42 | 2  | 5  | 5  | 8   | 0.750  | 0.805 | 0.807 | 1.129 | 24.39  | 13.42 | 8  | 8   | 462  | 51.5  | 7.12 |

|         |                                                                                                            |       |   |    |    |     |       |       |       |       |        |       |    |     |      |       |       |
|---------|------------------------------------------------------------------------------------------------------------|-------|---|----|----|-----|-------|-------|-------|-------|--------|-------|----|-----|------|-------|-------|
| Q9D0J4  | ADP-ribosylation factor-like protein 2 OS=Mus musculus GN=Arl2 PE=1 SV=1 - [ARL2_MOUSE]                    | 26.63 | 1 | 4  | 4  | 12  | 1.046 | 0.712 | 0.740 | 1.129 | 39.16  | 26.63 | 7  | 12  | 184  | 20.9  | 5.96  |
| Q8VGVW0 | MCG53396 OS=Mus musculus GN=OlfS84 PE=2 SV=1 - [Q8VGVW0_MOUSE]                                             | 11.60 | 1 | 2  | 2  | 3   | 0.993 | 0.755 | 1.935 | 1.129 | 2.75   | 11.60 | 2  | 3   | 319  | 36.0  | 9.29  |
| G5E8F4  | MCG140999 OS=Mus musculus GN=Fpge PE=4 SV=1 - [G5E8F4_MOUSE]                                               | 5.08  | 1 | 1  | 3  | 6   | 1.352 | 1.012 | 0.854 | 1.129 | 14.70  | 5.08  | 4  | 6   | 590  | 65.3  | 6.48  |
| O08529  | Calpain-2 catalytic subunit OS=Mus musculus GN=Capn2 PE=2 SV=4 - [CAN2_MOUSE]                              | 38.86 | 2 | 19 | 19 | 93  | 1.028 | 0.905 | 0.924 | 1.129 | 274.41 | 38.86 | 32 | 93  | 700  | 79.8  | 4.96  |
| Q8VDQ1  | Prostaglandin reductase 2 OS=Mus musculus GN=Pgr2 PE=1 SV=2 - [PTGR2_MOUSE]                                | 37.04 | 4 | 12 | 12 | 56  | 1.375 | 0.896 | 0.979 | 1.129 | 166.78 | 37.04 | 18 | 56  | 351  | 38.0  | 5.41  |
| O88544  | COP9 signalosome complex subunit 4 OS=Mus musculus GN=Cops4 PE=1 SV=1 - [COPS4_MOUSE]                      | 72.91 | 5 | 24 | 25 | 172 | 1.132 | 1.272 | 0.955 | 1.129 | 537.32 | 72.91 | 44 | 172 | 406  | 46.3  | 5.83  |
| Q8R1I1  | Cytochrome b-c1 complex subunit 9 OS=Mus musculus GN=Uqcrl0 PE=1 SV=1 - [UQCRL0_MOUSE]                     | 26.56 | 1 | 1  | 1  | 20  | 0.974 | 0.929 | 1.100 | 1.129 | 72.84  | 26.56 | 2  | 20  | 64   | 7.4   | 9.19  |
| E9PVD3  | Protein Dchs1 OS=Mus musculus GN=Dchs1 PE=2 SV=1 - [E9PVD3_MOUSE]                                          | 6.62  | 3 | 13 | 13 | 31  | 0.983 | 0.857 | 0.849 | 1.129 | 96.68  | 6.62  | 21 | 31  | 3291 | 346.2 | 5.00  |
| E9QK8   | Probable phospholipid-transporting ATPase 11C OS=Mus musculus GN=Atpl1c PE=2 SV=1 - [E9QK8_MOUSE]          | 9.50  | 4 | 6  | 7  | 13  | 1.316 | 1.060 | 1.003 | 1.130 | 46.87  | 9.50  | 10 | 13  | 1116 | 127.7 | 7.05  |
| Q91VK2  | Eef1d protein OS=Mus musculus GN=Eef1d PE=2 SV=1 - [Q91VK2_MOUSE]                                          | 79.71 | 2 | 1  | 18 | 171 | 0.976 | 1.054 | 1.084 | 1.130 | 529.31 | 79.71 | 32 | 171 | 276  | 30.6  | 4.98  |
| Q8JZW8  | Paraneoplastic antigen Ma3 homolog OS=Mus musculus GN=Pma3 PE=2 SV=1 - [PNMA3_MOUSE]                       | 6.87  | 1 | 3  | 3  | 8   | 0.934 | 0.754 | 0.805 | 1.130 | 18.71  | 6.87  | 6  | 8   | 466  | 54.0  | 9.25  |
| Q6ZWW7  | 60S ribosomal protein L35 OS=Mus musculus GN=Rpl35 PE=2 SV=1 - [RL35_MOUSE]                                | 40.65 | 4 | 5  | 7  | 14  | 0.816 | 0.736 | 0.872 | 1.130 | 35.98  | 40.65 | 9  | 14  | 123  | 14.5  | 11.05 |
| P51863  | V-type proton ATPase subunit d 1 OS=Mus musculus GN=Atpv0d1 PE=1 SV=2 - [ATPV0D1_MOUSE]                    | 49.00 | 1 | 15 | 15 | 81  | 0.531 | 1.422 | 1.150 | 1.130 | 211.88 | 49.00 | 25 | 81  | 351  | 40.3  | 5.00  |
| Q501P1  | Fibulin-7 OS=Mus musculus GN=Fbln7 PE=1 SV=1 - [FBLN7_MOUSE]                                               | 2.95  | 1 | 1  | 2  | 2   | 1.210 | 1.462 | 1.343 | 1.130 | 4.33   | 2.95  | 2  | 2   | 440  | 47.9  | 7.83  |
| F7CZ64  | Voltage-dependent calcium channel gamma-8 subunit OS=Mus musculus GN=Cacng8 PE=4 SV=2 - [F7CZ64_MOUSE]     | 30.02 | 2 | 6  | 6  | 62  | 0.620 | 2.242 | 1.530 | 1.130 | 232.65 | 30.02 | 11 | 62  | 423  | 43.4  | 9.20  |
| Q9JIG4  | Protein phosphatase 1 regulatory subunit 3F OS=Mus musculus GN=Ppp1r3f PE=1 SV=3 - [PPR3F_MOUSE]           | 33.17 | 5 | 15 | 15 | 40  | 0.717 | 0.918 | 0.943 | 1.130 | 93.41  | 33.17 | 25 | 40  | 799  | 84.1  | 4.70  |
| A2AH25  | Rho GTPase-activating protein 1 OS=Mus musculus GN=Arhgap1 PE=2 SV=1 - [ARHGA1_MOUSE]                      | 56.16 | 2 | 19 | 20 | 95  | 0.663 | 1.366 | 1.029 | 1.130 | 291.69 | 56.16 | 36 | 95  | 479  | 54.4  | 5.87  |
| Q8C353  | Transmembrane protein 252 OS=Mus musculus GN=Tmem252 PE=2 SV=1 - [TM252_MOUSE]                             | 8.74  | 1 | 1  | 1  | 1   | 0.946 | 0.985 | 1.444 | 1.130 | 0.00   | 8.74  | 1  | 1   | 183  | 20.4  | 4.82  |
| Q8QZV4  | Serine/threonine-protein kinase 32C OS=Mus musculus GN=Sk32c PE=2 SV=1 - [SK32C_MOUSE]                     | 16.39 | 2 | 7  | 8  | 74  | 0.860 | 1.359 | 1.527 | 1.130 | 185.63 | 16.39 | 14 | 74  | 488  | 55.2  | 6.16  |
| E9Q3A7  | Protein Cdh19 OS=Mus musculus GN=Cdh19 PE=3 SV=1 - [E9Q3A7_MOUSE]                                          | 10.26 | 1 | 5  | 6  | 11  | 1.481 | 0.833 | 1.254 | 1.130 | 23.82  | 10.26 | 7  | 11  | 770  | 87.2  | 4.70  |
| P58802  | TBC1 domain family member 10A OS=Mus musculus GN=Tbcd10a PE=1 SV=1 - [TBCD10A_MOUSE]                       | 24.80 | 2 | 10 | 10 | 31  | 0.800 | 0.969 | 1.011 | 1.130 | 77.59  | 24.80 | 17 | 31  | 500  | 56.2  | 7.85  |
| Q8BG39  | Synaptic vesicle glycoprotein 2B OS=Mus musculus GN=SV2b PE=1 SV=1 - [SV2B_MOUSE]                          | 15.52 | 1 | 10 | 11 | 119 | 1.297 | 2.071 | 1.809 | 1.131 | 374.32 | 15.52 | 19 | 119 | 683  | 77.4  | 5.57  |
| Q9WV02  | RNA-binding motif protein, X chromosome OS=Mus musculus GN=Rbmx PE=1 SV=1 - [RBMX_MOUSE]                   | 35.55 | 4 | 2  | 14 | 91  | 1.605 | 0.934 | 1.383 | 1.131 | 235.41 | 35.55 | 26 | 91  | 391  | 42.3  | 10.05 |
| Q8BK02  | KN motif and ankyrin repeat domain-containing protein 2 OS=Mus musculus GN=Kank2 PE=1 SV=1 - [KANK2_MOUSE] | 11.15 | 2 | 6  | 6  | 22  | 0.633 | 2.329 | 0.935 | 1.131 | 42.42  | 11.15 | 9  | 22  | 843  | 90.2  | 5.55  |
| Q8BH55  | Threonine synthase-like 1 OS=Mus musculus GN=Thns1 PE=2 SV=1 - [THNS1_MOUSE]                               | 35.74 | 6 | 21 | 22 | 83  | 1.012 | 1.146 | 0.950 | 1.131 | 254.46 | 35.74 | 37 | 83  | 747  | 83.0  | 7.20  |
| Q9DCI3  | MLN64 N-terminal domain homolog OS=Mus musculus GN=Stard3nl PE=1 SV=2 - [STARD3NL_MOUSE]                   | 9.79  | 1 | 2  | 2  | 8   | 1.339 | 1.058 | 0.921 | 1.131 | 23.42  | 9.79  | 4  | 8   | 235  | 26.8  | 5.02  |

|          |                                                                                                                                       |       |    |    |    |     |       |       |       |       |         |       |    |     |      |       |      |
|----------|---------------------------------------------------------------------------------------------------------------------------------------|-------|----|----|----|-----|-------|-------|-------|-------|---------|-------|----|-----|------|-------|------|
| Q9QZD5   | Rab proteins geranylgeranyltransferase component A 2 OS=Mus musculus GN=Chml PE=2 SV=2 - [RAE2_MOUSE]                                 | 2.09  | 1  | 1  | 1  | 2   | 1.312 | 0.435 | 0.870 | 1.131 | 5.64    | 2.09  | 2  | 2   | 621  | 70.0  | 5.19 |
| P62814   | V-type proton ATPase subunit B, brain isoform OS=Mus musculus GN=Atp6v1b2 PE=1 SV=1 [VATB2_MOUSE]                                     | 86.89 | 2  | 34 | 34 | 784 | 0.873 | 1.049 | 1.130 | 1.131 | 2445.46 | 86.89 | 62 | 784 | 511  | 56.5  | 5.81 |
| E9Q5J6   | Protein A730017C20Rik OS=Mus musculus GN=A730017C20Rik PE=2 SV=1 - [E9Q5J6_MOUSE]                                                     | 36.27 | 3  | 4  | 4  | 10  | 1.433 | 1.065 | 0.849 | 1.131 | 30.83   | 36.27 | 4  | 10  | 193  | 21.8  | 9.36 |
| A2AIH8   | Pirin (Fragment) OS=Mus musculus GN=Pir PE=2 SV=1 - [A2AIH8_MOUSE]                                                                    | 22.13 | 2  | 5  | 5  | 8   | 1.085 | 1.258 | 1.333 | 1.131 | 17.67   | 22.13 | 7  | 8   | 253  | 27.9  | 6.92 |
| A6X919   | Probable C-mannosyltransferase DPY19L1 OS=Mus musculus GN=Dpy19l1 PE=2 SV=1 - [DPY19L1_MOUSE]                                         | 11.26 | 3  | 5  | 5  | 12  | 0.727 | 0.540 | 0.846 | 1.132 | 38.37   | 11.26 | 7  | 12  | 746  | 84.1  | 9.16 |
| Q80VP9   | Aspartate beta-hydroxylase domain-containing protein 2 OS=Mus musculus GN=Asphd2 PE=2 SV=1 - [ASPHD2_MOUSE]                           | 14.29 | 3  | 4  | 5  | 12  | 0.732 | 1.181 | 1.309 | 1.132 | 33.07   | 14.29 | 7  | 12  | 343  | 38.7  | 7.05 |
| Q9DCS2   | UPF0585 protein C16orf13 homolog OS=Mus musculus PE=1 SV=1 - [CP013_MOUSE]                                                            | 48.04 | 5  | 9  | 9  | 28  | 0.738 | 0.989 | 0.785 | 1.132 | 68.27   | 48.04 | 15 | 28  | 204  | 22.7  | 6.52 |
| F6WV80   | Ephrin type-A receptor 10 (Fragment) OS=Mus musculus GN=Epha10 PE=4 SV=1 - [F6WV80_MOUSE]                                             | 17.52 | 3  | 7  | 8  | 12  | 0.936 | 0.931 | 1.289 | 1.132 | 31.51   | 17.52 | 9  | 12  | 862  | 93.1  | 7.08 |
| P35330   | Intercellular adhesion molecule 2 OS=Mus musculus GN=Icam2 PE=1 SV=1 - [ICAM2_MOUSE]                                                  | 19.86 | 4  | 4  | 4  | 9   | 1.144 | 1.252 | 0.922 | 1.132 | 21.18   | 19.86 | 7  | 9   | 277  | 31.4  | 7.91 |
| Q61151   | Serine/threonine-protein phosphatase 2A 56 kDa regulatory subunit epsilon isoform OS=Mus musculus GN=Ppp2r5e PE=2 SV=3 - [ZASE_MOUSE] | 34.26 | 1  | 10 | 16 | 54  | 0.598 | 0.849 | 1.026 | 1.132 | 178.28  | 34.26 | 27 | 54  | 467  | 54.7  | 6.95 |
| Q8BUM6   | Protein FAM163B OS=Mus musculus GN=Fam163b PE=1 SV=1 - [F163B_MOUSE]                                                                  | 41.32 | 1  | 3  | 3  | 17  | 2.670 | 1.475 | 1.952 | 1.132 | 57.81   | 41.32 | 5  | 17  | 167  | 18.3  | 5.15 |
| Q8BFP9   | [Pyruvate dehydrogenase [lipoamide]] kinase isozyme 1, mitochondrial OS=Mus musculus GN=Pdk1 PE=2 SV=2 - [PDK1_MOUSE]                 | 33.18 | 1  | 9  | 12 | 38  | 0.726 | 1.386 | 1.012 | 1.132 | 101.82  | 33.18 | 19 | 38  | 434  | 49.0  | 8.19 |
| A2ASR2   | Brefeldin A-inhibited guanine nucleotide-exchange protein 2 OS=Mus musculus GN=Argef2 PE=1 SV=1 - [ARAF2_MOUSE]                       | 29.69 | 2  | 30 | 44 | 122 | 0.812 | 1.010 | 1.101 | 1.132 | 361.38  | 29.69 | 72 | 122 | 1792 | 202.1 | 6.55 |
| Q8VCT3   | Aminopeptidase B OS=Mus musculus GN=Rnpep PE=2 SV=2 - [AMPB_MOUSE]                                                                    | 36.15 | 2  | 21 | 21 | 103 | 0.734 | 1.260 | 1.128 | 1.133 | 294.77  | 36.15 | 40 | 103 | 650  | 72.4  | 5.35 |
| Q80U87   | Ubiquitin carboxyl-terminal hydrolase 8 OS=Mus musculus GN=Usp8 PE=1 SV=2 - [UBP8_MOUSE]                                              | 20.93 | 2  | 19 | 20 | 68  | 1.448 | 0.747 | 1.076 | 1.133 | 192.65  | 20.93 | 33 | 68  | 1080 | 122.5 | 8.47 |
| Q9CQF4   | Uncharacterized protein C6orf203 homolog OS=Mus musculus PE=1 SV=1 - [CF203_MOUSE]                                                    | 27.92 | 1  | 3  | 9  | 19  | 2.973 | 1.131 | 1.189 | 1.133 | 39.04   | 27.92 | 12 | 19  | 240  | 27.8  | 9.36 |
| Q8BGY2   | Eukaryotic translation initiation factor 5A-2 OS=Mus musculus GN=Elf5a2 PE=2 SV=3 - [IF5A2_MOUSE]                                     | 50.98 | 1  | 3  | 9  | 94  | 3.291 | 1.402 | 1.087 | 1.133 | 276.96  | 50.98 | 15 | 94  | 153  | 16.8  | 5.58 |
| Q91WK7   | Ankyrin repeat domain-containing protein 54 OS=Mus musculus GN=Ankrd54 PE=1 SV=1 - [ANR54_MOUSE]                                      | 26.42 | 5  | 6  | 6  | 9   | 0.839 | 0.794 | 0.910 | 1.133 | 18.50   | 26.42 | 9  | 9   | 299  | 32.5  | 6.68 |
| P11798   | Calcium/calmodulin-dependent protein kinase type II subunit alpha OS=Mus musculus GN=Camk2a PE=1 SV=2 - [CAMK2A_MOUSE]                | 53.35 | 6  | 16 | 25 | 621 | 0.625 | 1.978 | 1.675 | 1.133 | 1668.22 | 53.35 | 46 | 621 | 478  | 54.1  | 7.08 |
| Q9D2V5   | Protein AAR2 homolog OS=Mus musculus GN=Aar2 PE=2 SV=3 - [AAR2_MOUSE]                                                                 | 8.59  | 1  | 2  | 2  | 4   | 1.037 | 0.807 | 0.929 | 1.133 | 14.16   | 8.59  | 4  | 4   | 384  | 43.4  | 5.48 |
| Q5DU14-3 | Isoform 3 of Unconventional myosin-XVI OS=Mus musculus GN=Myo16 - [MYO16_MOUSE]                                                       | 3.38  | 4  | 4  | 6  | 10  | 2.639 | 1.855 | 1.516 | 1.133 | 22.69   | 3.38  | 8  | 10  | 1863 | 205.0 | 7.21 |
| A2ARP1-3 | Isoform 3 of Inositol hexakisphosphate and diphosphoinositol-pentakisphosphate kinase 1 OS=Mus musculus GN=Ppip5k1 - [VIP1_MOUSE]     | 21.98 | 11 | 19 | 26 | 55  | 0.687 | 0.896 | 0.959 | 1.133 | 144.73  | 21.98 | 42 | 55  | 1415 | 157.5 | 5.33 |

|          |                                                                                                                 |       |   |    |    |     |       |       |       |       |         |       |    |     |      |       |      |
|----------|-----------------------------------------------------------------------------------------------------------------|-------|---|----|----|-----|-------|-------|-------|-------|---------|-------|----|-----|------|-------|------|
| Q9CZU6   | Citrate synthase, mitochondrial OS=Mus musculus GN=Cs PE=1 SV=1 - [CISY_MOUSE]                                  | 51.08 | 1 | 13 | 21 | 406 | 0.672 | 1.074 | 1.070 | 1.133 | 1048.36 | 51.08 | 39 | 406 | 464  | 51.7  | 8.57 |
| O35710-2 | Isoform 2 of Nocturnin OS=Mus musculus GN=Ccm4l - [NOCT_MOUSE]                                                  | 9.86  | 2 | 3  | 3  | 8   | 0.520 | 1.130 | 1.055 | 1.133 | 21.30   | 9.86  | 4  | 8   | 365  | 41.5  | 5.87 |
| P97950   | Ras-related protein Rab-33A OS=Mus musculus GN=Rab33a PE=2 SV=1 - [RB33A_MOUSE]                                 | 32.07 | 1 | 5  | 7  | 17  | 1.152 | 1.525 | 0.969 | 1.133 | 52.94   | 32.07 | 13 | 17  | 237  | 26.5  | 7.88 |
| P20152   | Vimentin OS=Mus musculus GN=Vim PE=1 SV=3 - [VIME_MOUSE]                                                        | 61.59 | 3 | 23 | 30 | 404 | 1.015 | 2.285 | 0.721 | 1.133 | 1063.94 | 61.59 | 57 | 404 | 466  | 53.7  | 5.12 |
| O54890   | Integrin beta-3 OS=Mus musculus GN=Itgb3 PE=1 SV=2 - [ITB3_MOUSE]                                               | 8.51  | 1 | 6  | 6  | 14  | 1.265 | 1.647 | 0.841 | 1.134 | 43.46   | 8.51  | 10 | 14  | 787  | 86.7  | 5.24 |
| Q3UHF3-2 | Isoform 2 of Mesoderm induction early response protein 3 OS=Mus musculus GN=Mier3 - [MIER3_MOUSE]               | 13.58 | 3 | 3  | 3  | 8   | 0.996 | 2.021 | 1.247 | 1.134 | 2.23    | 13.58 | 3  | 8   | 523  | 58.6  | 4.64 |
| Q8CF60   | Protein Zfp263 OS=Mus musculus GN=Zfp263 PE=2 SV=1 - [Q8CF60_MOUSE]                                             | 5.74  | 2 | 2  | 3  | 3   | 1.770 | 1.063 | 0.999 | 1.134 | 5.49    | 5.74  | 3  | 3   | 680  | 77.5  | 6.87 |
| Q5RKN9   | Capping protein (Actin filament) muscle Z-line, alpha 1 OS=Mus musculus GN=Capza1 PE=2 SV=1 - [Q5RKN9_MOUSE]    | 54.20 | 1 | 1  | 11 | 117 | 1.631 | 1.161 | 1.412 | 1.134 | 339.85  | 54.20 | 20 | 117 | 286  | 32.9  | 5.55 |
| Q8R179   | Kelch repeat and BTB domain-containing protein 4 OS=Mus musculus GN=Kbtbd4 PE=2 SV=1 - [KBTB4_MOUSE]            | 8.80  | 2 | 3  | 4  | 5   | 1.130 | 1.143 | 0.887 | 1.134 | 12.50   | 8.80  | 5  | 5   | 534  | 59.8  | 5.74 |
| O88962   | 7-alpha-hydroxycholesterol-4-en-3-one 12-alpha-hydroxylase OS=Mus musculus GN=Cyp8b1 PE=2 SV=1 - [CYP8B1_MOUSE] | 1.80  | 1 | 1  | 1  | 2   | 1.240 | 1.953 | 1.785 | 1.134 | 6.73    | 1.80  | 1  | 2   | 500  | 57.7  | 8.84 |
| Q99NF1   | Beta,beta-carotene 9',10'-oxygenase OS=Mus musculus GN=Bco2 PE=1 SV=1 - [BCDO2_MOUSE]                           | 8.27  | 1 | 2  | 2  | 2   | 1.940 | 2.441 | 0.760 | 1.134 | 0.00    | 8.27  | 2  | 2   | 532  | 60.1  | 6.54 |
| Q7TNE3   | Sperm-associated antigen 7 OS=Mus musculus GN=Spag7 PE=1 SV=1 - [SPAG7_MOUSE]                                   | 28.19 | 2 | 6  | 6  | 20  | 1.983 | 1.038 | 1.293 | 1.134 | 55.93   | 28.19 | 11 | 20  | 227  | 25.9  | 7.43 |
| Q6PCN3   | Tau-tubulin kinase 1 OS=Mus musculus GN=Ttk1 PE=2 SV=3 - [TTK1_MOUSE]                                           | 20.41 | 1 | 18 | 20 | 63  | 1.538 | 1.030 | 1.503 | 1.134 | 153.16  | 20.41 | 26 | 63  | 1308 | 141.5 | 5.62 |
| AZAKD7   | Alpha-1-syntrophin OS=Mus musculus GN=Snta1 PE=2 SV=1 - [AZAKD7_MOUSE]                                          | 41.88 | 2 | 16 | 17 | 54  | 0.716 | 1.025 | 1.022 | 1.134 | 156.63  | 41.88 | 29 | 54  | 499  | 53.2  | 6.80 |
| Q9ESL4-2 | Isoform 2 of Mitogen-activated protein kinase kinase kinase MLT OS=Mus musculus GN=Mltk - [MLTK_MOUSE]          | 10.35 | 3 | 1  | 4  | 10  | 1.196 | 1.182 | 0.897 | 1.134 | 39.13   | 10.35 | 6  | 10  | 454  | 51.3  | 5.35 |
| Q60710   | Deoxynucleoside triphosphate triphosphohydrolase SAMHD1 OS=Mus musculus GN=Samhd1 PE=1 SV=3                     | 30.94 | 6 | 16 | 16 | 29  | 0.798 | 1.099 | 0.937 | 1.134 | 71.38   | 30.94 | 25 | 29  | 627  | 72.6  | 7.96 |
| Q307W7   | Kinocilin OS=Mus musculus GN=Kncn PE=1 SV=1 - [KNCN_MOUSE]                                                      | 6.45  | 1 | 1  | 1  | 2   | 0.913 | 1.045 | 1.031 | 1.134 | 4.56    | 6.45  | 1  | 2   | 124  | 12.8  | 9.41 |
| E9Q9I2   | Protein Dlg5 OS=Mus musculus GN=Dlg5 PE=2 SV=1 - [E9Q9I2_MOUSE]                                                 | 7.90  | 4 | 11 | 11 | 16  | 1.151 | 0.925 | 1.294 | 1.135 | 39.38   | 7.90  | 16 | 16  | 1898 | 212.0 | 7.52 |
| P36916   | Guanine nucleotide-binding protein-like 1 OS=Mus musculus GN=Gnl1 PE=1 SV=4                                     | 22.57 | 2 | 13 | 13 | 46  | 0.633 | 0.921 | 1.055 | 1.135 | 147.50  | 22.57 | 23 | 46  | 607  | 68.7  | 5.68 |
| Q99JR1   | Sideroflexin-1 OS=Mus musculus GN=Sfxn1 PE=1 SV=3 - [SFXN1_MOUSE]                                               | 46.58 | 1 | 11 | 13 | 120 | 0.699 | 1.126 | 0.861 | 1.135 | 319.54  | 46.58 | 23 | 120 | 322  | 35.6  | 9.23 |
| Q8BVY0   | Protein Rsl1d1 OS=Mus musculus GN=Rsl1d1 PE=2 SV=1 - [Q8BVY0_MOUSE]                                             | 16.59 | 1 | 6  | 6  | 9   | 0.769 | 1.010 | 0.862 | 1.135 | 17.26   | 16.59 | 8  | 9   | 452  | 50.4  | 9.98 |
| P56942   | Pro-MCH OS=Mus musculus GN=Pmch PE=1 SV=2 - [MCH_MOUSE]                                                         | 36.97 | 1 | 6  | 6  | 42  | 1.700 | 0.330 | 1.063 | 1.135 | 139.04  | 36.97 | 10 | 42  | 165  | 18.5  | 7.14 |
| Q8CD92-2 | Isoform 2 of Tetratricopeptide repeat protein 27 OS=Mus musculus GN=Ttc27 - [TTC27_MOUSE]                       | 6.38  | 2 | 5  | 5  | 10  | 0.687 | 1.113 | 1.006 | 1.135 | 22.54   | 6.38  | 9  | 10  | 846  | 96.2  | 5.77 |
| Q8CBX0   | Transmembrane protein 63C OS=Mus musculus GN=Tmem63c PE=2 SV=1 - [TM63C_MOUSE]                                  | 7.48  | 1 | 5  | 5  | 11  | 0.885 | 1.300 | 0.936 | 1.135 | 22.98   | 7.48  | 8  | 11  | 802  | 93.0  | 7.77 |
| P48036   | Annexin A5 OS=Mus musculus GN=Anxa5 PE=1 SV=1 - [ANXA5_MOUSE]                                                   | 64.58 | 1 | 20 | 20 | 210 | 1.894 | 1.517 | 0.795 | 1.135 | 634.17  | 64.58 | 35 | 210 | 319  | 35.7  | 4.96 |

|          |                                                                                                                          |       |    |    |    |     |       |       |       |       |         |       |    |     |      |       |       |
|----------|--------------------------------------------------------------------------------------------------------------------------|-------|----|----|----|-----|-------|-------|-------|-------|---------|-------|----|-----|------|-------|-------|
| P70349   | Histidine triad nucleotide-binding protein 1 OS=Mus musculus GN=Hint1 PE=1 SV=3 - [HINT1_MOUSE]                          | 78.57 | 2  | 7  | 7  | 61  | 1.317 | 0.989 | 1.255 | 1.135 | 222.41  | 78.57 | 14 | 61  | 126  | 13.8  | 6.87  |
| P27808   | Alpha-1,3-mannosylglycoprotein 2-beta-N-acetylglucosaminyltransferase OS=Mus musculus GN=Mgat1 PE=2 SV=1 - [MGAT1_MOUSE] | 2.68  | 1  | 1  | 1  | 2   | 1.518 | 0.455 | 1.476 | 1.135 | 5.65    | 2.68  | 1  | 2   | 447  | 51.7  | 8.90  |
| Q922X9   | Protein arginine N-methyltransferase 7 OS=Mus musculus GN=Prmt7 PE=1 SV=1 - [ANM7_MOUSE]                                 | 3.61  | 2  | 2  | 2  | 8   | 1.845 | 0.808 | 1.013 | 1.135 | 17.71   | 3.61  | 4  | 8   | 692  | 78.3  | 5.74  |
| Q8C166   | Copine-1 OS=Mus musculus GN=Cpne1 PE=1 SV=1 - [CPNE1_MOUSE]                                                              | 31.72 | 8  | 10 | 16 | 46  | 0.607 | 0.990 | 0.851 | 1.135 | 131.88  | 31.72 | 28 | 46  | 536  | 58.8  | 5.66  |
| Q9D9V3-2 | Isoform 2 of Ethylmalonyl-CoA decarboxylase OS=Mus musculus GN=Echdc1 -                                                  | 45.48 | 3  | 12 | 12 | 50  | 1.275 | 0.744 | 0.826 | 1.135 | 152.42  | 45.48 | 22 | 50  | 299  | 32.7  | 7.02  |
| P09470   | Angiotensin-converting enzyme OS=Mus musculus GN=Ace PE=1 SV=3 - [ACE_MOUSE]                                             | 13.19 | 5  | 14 | 16 | 42  | 0.779 | 1.614 | 0.812 | 1.135 | 102.43  | 13.19 | 29 | 42  | 1312 | 150.8 | 6.55  |
| Q14951   | Tektin-4 OS=Mus musculus GN=Tekt4 PE=2 SV=1 - [TEKT4_MOUSE]                                                              | 5.37  | 1  | 2  | 2  | 2   | 1.690 | 1.212 | 1.287 | 1.135 | 4.51    | 5.37  | 2  | 2   | 447  | 52.0  | 6.16  |
| F8VQ75   | Kinesin-like protein KIF13A OS=Mus musculus GN=Kif13a PE=2 SV=1 - [F8VQ75_MOUSE]                                         | 5.55  | 2  | 6  | 9  | 12  | 1.051 | 0.893 | 1.365 | 1.135 | 25.85   | 5.55  | 10 | 12  | 1749 | 195.6 | 5.38  |
| Q8BVE3   | V-type proton ATPase subunit H OS=Mus musculus GN=Atp6v1h PE=1 SV=1 -                                                    | 50.93 | 1  | 21 | 21 | 305 | 0.808 | 1.313 | 1.110 | 1.135 | 1144.71 | 50.93 | 37 | 305 | 483  | 55.8  | 6.61  |
| Q61161   | Mitogen-activated protein kinase kinase kinase 2 OS=Mus musculus GN=Map4k2 PE=1 SV=1 -                                   | 23.51 | 5  | 13 | 14 | 32  | 1.065 | 0.805 | 1.046 | 1.136 | 110.16  | 23.51 | 23 | 32  | 821  | 91.2  | 6.46  |
| Q9CQ19   | Myosin regulatory light polypeptide 9 OS=Mus musculus GN=My19 PE=1 SV=3 - [MY19_MOUSE]                                   | 48.26 | 3  | 1  | 8  | 118 | 0.852 | 1.826 | 0.971 | 1.136 | 350.20  | 48.26 | 15 | 118 | 172  | 19.8  | 4.92  |
| Q9CR86   | Calcium-regulated heat stable protein 1 OS=Mus musculus GN=Carhsp1 PE=1 SV=1 - [CHSP1_MOUSE]                             | 66.89 | 2  | 8  | 8  | 36  | 1.990 | 0.428 | 1.418 | 1.136 | 90.80   | 66.89 | 12 | 36  | 148  | 16.1  | 8.21  |
| Q8BG51   | Mitochondrial Rho GTPase 1 OS=Mus musculus GN=Rhot1 PE=2 SV=1 - [MIRO1_MOUSE]                                            | 29.79 | 5  | 15 | 17 | 77  | 0.770 | 1.062 | 0.990 | 1.136 | 239.06  | 29.79 | 26 | 77  | 631  | 72.2  | 6.49  |
| Q61702   | Inter-alpha-trypsin inhibitor heavy chain H1 OS=Mus musculus GN=Ith1 PE=1 SV=2 - [ITH1_MOUSE]                            | 8.71  | 2  | 5  | 5  | 13  | 1.635 | 1.912 | 0.477 | 1.136 | 41.76   | 8.71  | 9  | 13  | 907  | 101.0 | 6.96  |
| P51791-2 | Isoform 2 of H(+)/Cl(-) exchange transporter 3 OS=Mus musculus GN=Cln3 -                                                 | 17.24 | 5  | 10 | 12 | 36  | 0.759 | 0.967 | 1.104 | 1.136 | 81.43   | 17.24 | 20 | 36  | 760  | 84.4  | 7.25  |
| Q9CR61   | NADH dehydrogenase [ubiquinone] 1 beta subcomplex subunit 7 OS=Mus musculus GN=Ndufb7 PE=1 SV=3 - [NDUFB7_MOUSE]         | 59.85 | 1  | 8  | 8  | 67  | 0.622 | 0.962 | 1.027 | 1.136 | 197.09  | 59.85 | 16 | 67  | 137  | 16.3  | 8.18  |
| P27661   | Histone H2A.x OS=Mus musculus GN=H2afx PE=1 SV=2 - [HZAX_MOUSE]                                                          | 37.76 | 1  | 2  | 5  | 130 | 0.766 | 1.054 | 1.156 | 1.136 | 308.81  | 37.76 | 10 | 130 | 143  | 15.1  | 10.74 |
| Q8C8C1   | Receptor-transporting protein 1 OS=Mus musculus GN=Rtp1 PE=1 SV=1 - [RTP1_MOUSE]                                         | 3.80  | 1  | 1  | 1  | 1   | 3.115 | 1.767 | 1.802 | 1.136 | 1.77    | 3.80  | 1  | 1   | 263  | 30.7  | 7.61  |
| P08228   | Superoxide dismutase [Cu-Zn] OS=Mus musculus GN=Sod1 PE=1 SV=2 - [SODC_MOUSE]                                            | 47.40 | 1  | 8  | 8  | 359 | 1.637 | 1.239 | 1.416 | 1.136 | 1176.09 | 47.40 | 15 | 359 | 154  | 15.9  | 6.51  |
| P50396   | Rab GDP dissociation inhibitor alpha OS=Mus musculus GN=Gdi1 PE=1 SV=3 - [GDI1_MOUSE]                                    | 73.38 | 3  | 25 | 31 | 561 | 0.978 | 1.117 | 1.043 | 1.136 | 1547.78 | 73.38 | 59 | 561 | 447  | 50.5  | 5.08  |
| P17426-2 | Isoform B of AP-2 complex subunit alpha-1 OS=Mus musculus GN=Ap2a1 - [AP2A1_MOUSE]                                       | 56.13 | 5  | 33 | 49 | 445 | 0.617 | 1.081 | 1.104 | 1.136 | 1205.03 | 56.13 | 91 | 445 | 955  | 105.4 | 7.66  |
| Q8B236-2 | Isoform 2 of RAD50-interacting protein 1 OS=Mus musculus GN=Rint1 -                                                      | 7.08  | 2  | 3  | 3  | 3   | 0.465 | 0.864 | 1.084 | 1.136 | 5.51    | 7.08  | 3  | 3   | 734  | 83.4  | 5.07  |
| Q9D5U0   | Lysophosphatidylcholine acyltransferase 2B OS=Mus musculus GN=Lpcat2b PE=2 SV=1 - [PCT2B_MOUSE]                          | 3.29  | 1  | 1  | 1  | 1   | 2.085 | 1.549 | 1.438 | 1.136 | 3.12    | 3.29  | 1  | 1   | 516  | 58.3  | 8.91  |
| P97302   | Transcription regulator protein BACH1 OS=Mus musculus GN=Bach1 PE=1 SV=1 - [BACH1_MOUSE]                                 | 4.60  | 1  | 3  | 3  | 4   | 1.319 | 1.073 | 0.843 | 1.137 | 10.80   | 4.60  | 4  | 4   | 739  | 81.3  | 5.01  |
| P05784   | Keratin, type I cytoskeletal 18 OS=Mus musculus GN=Krt18 PE=1 SV=5 - [K1C18_MOUSE]                                       | 35.93 | 13 | 10 | 13 | 36  | 1.201 | 1.326 | 0.883 | 1.137 | 104.54  | 35.93 | 22 | 36  | 423  | 47.5  | 5.33  |

|          |                                                                                                                                        |       |    |     |     |     |       |       |       |       |         |       |     |     |      |        |      |
|----------|----------------------------------------------------------------------------------------------------------------------------------------|-------|----|-----|-----|-----|-------|-------|-------|-------|---------|-------|-----|-----|------|--------|------|
| Q6ZWR6-4 | Isoform 4 of Nesprin-1 OS=Mus musculus GN=Syne1 - [SYNE1_MOUSE]                                                                        | 24.92 | 10 | 154 | 192 | 470 | 0.855 | 1.050 | 1.111 | 1.137 | 1327.83 | 24.92 | 310 | 470 | 8797 | 1009.0 | 5.59 |
| P63001   | Ras-related C3 botulinum toxin substrate 1 OS=Mus musculus GN=Rac1 PE=1 SV=1 - [RAC1_MOUSE]                                            | 43.23 | 8  | 6   | 12  | 102 | 0.546 | 1.020 | 1.071 | 1.137 | 318.38  | 43.23 | 22  | 102 | 192  | 21.4   | 8.50 |
| Q9DAI6   | Protein FAM135B OS=Mus musculus GN=Fam135b PE=2 SV=3 - [F135B_MOUSE]                                                                   | 3.92  | 1  | 5   | 5   | 7   | 0.442 | 0.859 | 0.938 | 1.137 | 12.83   | 3.92  | 7   | 7   | 1403 | 155.4  | 6.02 |
| F8VPY2   | Transcription initiation factor TFIIID subunit 5 OS=Mus musculus GN=Taf5 PE=4 SV=1 - [F8VPY2_MOUSE]                                    | 4.49  | 2  | 1   | 1   | 2   | 1.278 | 0.764 | 0.795 | 1.137 | 3.28    | 4.49  | 1   | 2   | 801  | 86.9   | 5.64 |
| Q9D279   | Mitotic interactor and substrate of PLK1 OS=Mus musculus GN=Misp PE=2 SV=1 - [MISP_MOUSE]                                              | 1.08  | 1  | 1   | 1   | 2   | 1.508 | 1.628 | 1.128 | 1.137 | 3.84    | 1.08  | 1   | 2   | 648  | 72.2   | 6.18 |
| Q91V92   | ATP-citrate synthase OS=Mus musculus GN=Acly PE=1 SV=1 - [ACLY_MOUSE]                                                                  | 50.41 | 1  | 1   | 49  | 323 | 0.623 | 0.643 | 0.978 | 1.137 | 991.93  | 50.41 | 93  | 323 | 1091 | 119.7  | 7.44 |
| Q8R3U1   | HRAS-like suppressor 3 OS=Mus musculus GN=Pla2g16 PE=1 SV=2 - [HRSL3_MOUSE]                                                            | 24.69 | 3  | 4   | 4   | 11  | 0.943 | 0.569 | 0.909 | 1.137 | 37.66   | 24.69 | 7   | 11  | 162  | 17.9   | 8.72 |
| Q62148   | Retinal dehydrogenase 2 OS=Mus musculus GN=Aldh1a2 PE=1 SV=2 - [AL1A2_MOUSE]                                                           | 27.61 | 3  | 10  | 13  | 56  | 0.820 | 3.044 | 0.886 | 1.137 | 175.27  | 27.61 | 24  | 56  | 518  | 56.6   | 5.74 |
| P34884   | Macrophage migration inhibitory factor OS=Mus musculus GN=Mif PE=1 SV=2 - [MIF_MOUSE]                                                  | 23.48 | 1  | 4   | 4   | 106 | 1.749 | 0.875 | 0.931 | 1.137 | 227.99  | 23.48 | 8   | 106 | 115  | 12.5   | 7.34 |
| Q6NS45-3 | Isoform 3 of Coiled-coil domain-containing protein 66 OS=Mus musculus GN=Ccdc66 - [CCD66_MOUSE]                                        | 2.11  | 3  | 2   | 2   | 2   | 1.834 | 1.534 | 0.926 | 1.138 | 0.00    | 2.11  | 2   | 2   | 902  | 103.7  | 7.71 |
| Q9D8V7   | Signal peptidase complex catalytic subunit SEC11C OS=Mus musculus GN=Sec11c PE=2 SV=3 - [SC11C_MOUSE]                                  | 23.96 | 3  | 4   | 4   | 15  | 0.773 | 0.841 | 0.692 | 1.138 | 54.79   | 23.96 | 8   | 15  | 192  | 21.6   | 9.23 |
| Q8BXR1   | Probable cationic amino acid transporter OS=Mus musculus GN=Slc7a14 PE=2 SV=1 - [S7A14_MOUSE]                                          | 15.43 | 2  | 8   | 8   | 59  | 0.572 | 1.420 | 1.074 | 1.138 | 195.84  | 15.43 | 12  | 59  | 771  | 83.9   | 5.35 |
| Q8BR76   | Meckelin OS=Mus musculus GN=Tmem67 PE=1 SV=2 - [MKS3_MOUSE]                                                                            | 1.92  | 3  | 2   | 2   | 3   | 1.486 | 0.909 | 0.817 | 1.138 | 5.62    | 1.92  | 3   | 3   | 992  | 111.7  | 7.74 |
| Q62277   | Synaptophysin OS=Mus musculus GN=Syp PE=1 SV=2 - [SYPH_MOUSE]                                                                          | 33.76 | 1  | 6   | 11  | 165 | 1.175 | 1.413 | 1.236 | 1.138 | 489.34  | 33.76 | 19  | 165 | 314  | 34.0   | 4.94 |
| Q8BXR9-2 | Isoform 2 of Oxysterol-binding protein-related protein 6 OS=Mus musculus GN=Osbp6 - [OSBL6_MOUSE]                                      | 21.01 | 2  | 1   | 15  | 42  | 0.835 | 0.419 | 0.718 | 1.138 | 125.80  | 21.01 | 25  | 42  | 928  | 105.2  | 6.79 |
| Q8CGE9   | Regulator of G-protein signaling 12 OS=Mus musculus GN=Rgs12 PE=1 SV=2 - [RGS12_MOUSE]                                                 | 5.00  | 11 | 5   | 5   | 12  | 1.037 | 1.944 | 1.853 | 1.138 | 36.64   | 5.00  | 9   | 12  | 1381 | 149.5  | 7.59 |
| Q61425   | Hydroxyacyl-coenzyme A dehydrogenase, mitochondrial OS=Mus musculus GN=Hadh PE=1 SV=2 - [HCDH_MOUSE]                                   | 62.42 | 1  | 17  | 18  | 77  | 0.817 | 0.981 | 0.892 | 1.138 | 201.01  | 62.42 | 27  | 77  | 314  | 34.4   | 8.65 |
| E9PXX4   | High affinity cAMP-specific and IBMX-insensitive 3',5'-cyclic phosphodiesterase 8B OS=Mus musculus GN=Pde8b PE=2 SV=1 - [E9PXX4_MOUSE] | 9.04  | 9  | 6   | 7   | 13  | 0.932 | 1.261 | 1.129 | 1.138 | 32.37   | 9.04  | 10  | 13  | 730  | 82.6   | 6.35 |
| Q9QXL8   | Nucleoside diphosphate kinase 7 OS=Mus musculus GN=Nme7 PE=2 SV=1 - [NDK7_MOUSE]                                                       | 21.27 | 2  | 7   | 8   | 15  | 0.855 | 1.367 | 1.024 | 1.139 | 44.88   | 21.27 | 13  | 15  | 395  | 44.4   | 7.12 |
| Q8BUE5   | Alpha-1D adrenergic receptor OS=Mus musculus GN=Adra1a PE=2 SV=1 - [ADRA1A_MOUSE]                                                      | 4.22  | 2  | 2   | 2   | 2   | 0.972 | 0.906 | 0.885 | 1.139 | 3.80    | 4.22  | 2   | 2   | 427  | 47.5   | 9.36 |
| Q62101   | Serine/threonine-protein kinase D1 OS=Mus musculus GN=Prkd1 PE=1 SV=2 - [KPCD1_MOUSE]                                                  | 4.68  | 4  | 3   | 3   | 6   | 1.563 | 1.148 | 0.949 | 1.139 | 18.44   | 4.68  | 4   | 6   | 918  | 102.0  | 6.58 |
| P35492   | Histidine ammonia-lyase OS=Mus musculus GN=Hal PE=1 SV=1 - [HUTH_MOUSE]                                                                | 2.59  | 1  | 1   | 2   | 2   | 1.034 | 0.654 | 1.215 | 1.139 | 4.76    | 2.59  | 2   | 2   | 657  | 72.2   | 6.34 |
| Q6P5E6   | ADP-ribosylation factor-binding protein GGA2 OS=Mus musculus GN=Gga2 PE=1 SV=1 - [GGA2_MOUSE]                                          | 11.61 | 2  | 4   | 5   | 18  | 1.055 | 1.120 | 1.045 | 1.139 | 51.85   | 11.61 | 9   | 18  | 603  | 66.0   | 7.30 |
| Q9D1F9   | Protein Slc37a4 OS=Mus musculus GN=Slc37a4 PE=2 SV=1 - [Q9D1F9_MOUSE]                                                                  | 3.03  | 1  | 1   | 1   | 2   | 0.737 | 0.927 | 1.052 | 1.139 | 4.07    | 3.03  | 2   | 2   | 429  | 46.0   | 8.88 |
| Q8CBE3   | WD repeat-containing protein 37 OS=Mus musculus GN=Wdr37 PE=2 SV=1 - [WDR37_MOUSE]                                                     | 30.24 | 9  | 10  | 15  | 68  | 0.651 | 0.981 | 1.106 | 1.139 | 188.79  | 30.24 | 28  | 68  | 496  | 55.0   | 7.23 |

|          |                                                                                                                         |       |    |    |    |     |       |       |       |       |         |       |    |     |      |       |      |
|----------|-------------------------------------------------------------------------------------------------------------------------|-------|----|----|----|-----|-------|-------|-------|-------|---------|-------|----|-----|------|-------|------|
| P46664   | Adenylosuccinate synthetase isozyme 2<br>OS=Mus musculus<br>GN=Adss PE=1 SV=2 - [PURA2_MOUSE]                           | 47.59 | 1  | 16 | 18 | 92  | 0.884 | 0.820 | 0.988 | 1.139 | 268.03  | 47.59 | 33 | 92  | 456  | 50.0  | 6.38 |
| G5E8M7   | Glutathione S-transferase Mu 6<br>OS=Mus musculus<br>GN=Gstm6 PE=3 SV=1 - [G5E8M7_MOUSE]                                | 21.12 | 3  | 1  | 6  | 38  | 1.195 | 1.185 | 1.001 | 1.139 | 86.59   | 21.12 | 11 | 38  | 232  | 27.3  | 5.91 |
| Q9JL04   | Formin-2<br>OS=Mus musculus<br>GN=Fmn2 PE=1 SV=2 - [FMN2_MOUSE]                                                         | 18.06 | 1  | 21 | 23 | 100 | 0.741 | 0.977 | 1.526 | 1.139 | 282.98  | 18.06 | 41 | 100 | 1578 | 167.3 | 5.48 |
| P55264-2 | Isoform Short of Adenosine kinase<br>OS=Mus musculus<br>GN=Adk - [ADK_MOUSE]                                            | 41.74 | 2  | 14 | 14 | 99  | 0.778 | 0.853 | 1.039 | 1.139 | 235.15  | 41.74 | 23 | 99  | 345  | 38.4  | 6.04 |
| Q8CH72   | E3 ubiquitin-protein ligase TRIM32<br>OS=Mus musculus<br>GN=Trim32 PE=1 SV=2 - [TRIM32_MOUSE]                           | 31.15 | 3  | 16 | 16 | 54  | 1.088 | 1.077 | 1.055 | 1.139 | 153.27  | 31.15 | 28 | 54  | 655  | 72.0  | 6.90 |
| D3Z2Q2   | Syntaxin-binding protein 5<br>OS=Mus musculus<br>GN=Sxbp5 PE=2 SV=1 - [D3Z2Q2_MOUSE]                                    | 35.49 | 5  | 29 | 30 | 121 | 0.715 | 1.144 | 1.045 | 1.139 | 375.57  | 35.49 | 49 | 121 | 1099 | 121.6 | 6.96 |
| Q9D6D0   | Protein Slc25a27<br>OS=Mus musculus<br>GN=Slc25a27 PE=2 SV=1 - [Q9D6D0_MOUSE]                                           | 44.72 | 1  | 13 | 13 | 28  | 1.022 | 1.547 | 1.134 | 1.139 | 80.90   | 44.72 | 22 | 28  | 322  | 35.8  | 9.39 |
| Q9CQN3   | Mitochondrial import receptor subunit TOM6 homolog<br>OS=Mus musculus<br>GN=Tomm6 PE=3 SV=1 - [TOM6_MOUSE]              | 18.92 | 1  | 1  | 1  | 1   | 1.224 | 0.833 | 1.198 | 1.140 | 2.43    | 18.92 | 1  | 1   | 74   | 7.9   | 4.89 |
| Q8BUR4   | Dedicator of cytokinesis protein 1<br>OS=Mus musculus<br>GN=Dock1 PE=1 SV=3 - [DOCK1_MOUSE]                             | 14.64 | 2  | 21 | 24 | 58  | 0.960 | 0.672 | 0.996 | 1.140 | 152.93  | 14.64 | 42 | 58  | 1865 | 214.9 | 7.62 |
| P59016   | Vacuolar protein sorting-associated protein 33B<br>OS=Mus musculus<br>GN=Vps33b PE=1 SV=1 - [VP33B_MOUSE]               | 35.49 | 1  | 18 | 18 | 38  | 0.836 | 1.112 | 0.996 | 1.140 | 126.99  | 35.49 | 29 | 38  | 617  | 70.5  | 6.86 |
| Q8C033   | Rho guanine nucleotide exchange factor 10<br>OS=Mus musculus<br>GN=Arhgef10 PE=1 SV=2 - [ARHGA_MOUSE]                   | 13.38 | 4  | 13 | 13 | 31  | 0.861 | 0.353 | 0.893 | 1.140 | 87.18   | 13.38 | 21 | 31  | 1345 | 147.9 | 5.73 |
| Q8C181   | Muscleblind-like protein 2<br>OS=Mus musculus<br>GN=Mbnl2 PE=2 SV=2 - [MBNL2_MOUSE]                                     | 15.82 | 5  | 1  | 6  | 22  | 0.861 | 1.172 | 1.158 | 1.140 | 58.33   | 15.82 | 10 | 22  | 373  | 40.1  | 9.00 |
| Q61012   | Guanine nucleotide-binding protein G(T) subunit gamma-T1<br>OS=Mus musculus<br>GN=Gngt1 PE=1 SV=3 - [GPT1_MOUSE]        | 40.54 | 2  | 2  | 3  | 3   | 0.797 | 0.471 | 0.916 | 1.140 | 9.42    | 40.54 | 3  | 3   | 74   | 8.5   | 4.82 |
| Q9Z1G4-3 | Isoform A1-III of V-type proton ATPase 116 kDa subunit a<br>OS=Mus musculus<br>GN=Atp9a1 - [Atp9_MOUSE]                 | 40.75 | 7  | 32 | 33 | 528 | 0.671 | 1.261 | 1.206 | 1.141 | 1695.39 | 40.75 | 59 | 528 | 832  | 95.6  | 6.77 |
| Q9R078   | 5'-AMP-activated protein kinase subunit beta-1<br>OS=Mus musculus<br>GN=Prkab1 PE=1 SV=2 - [AAKB1_MOUSE]                | 19.63 | 1  | 3  | 3  | 13  | 1.039 | 0.900 | 0.931 | 1.141 | 52.11   | 19.63 | 5  | 13  | 270  | 30.3  | 6.23 |
| Q9D9D5-2 | Isoform 2 of Transmembrane and coiled coil domain-containing protein 5A<br>OS=Mus musculus<br>GN=Tmco5a - [TMCO5_MOUSE] | 3.53  | 2  | 1  | 1  | 1   | 0.888 | 1.007 | 1.223 | 1.141 | 2.58    | 3.53  | 1  | 1   | 283  | 33.5  | 4.91 |
| Q80T6A   | Myotubularin-related protein 12<br>OS=Mus musculus<br>GN=Mtmr12 PE=2 SV=2 - [MTR12_MOUSE]                               | 7.50  | 4  | 4  | 4  | 10  | 0.906 | 1.633 | 1.740 | 1.141 | 24.88   | 7.50  | 7  | 10  | 747  | 85.5  | 6.84 |
| O35638   | Cohesin subunit SA-2<br>OS=Mus musculus<br>GN=Stag2 PE=1 SV=3 - [STAG2_MOUSE]                                           | 7.55  | 3  | 5  | 9  | 15  | 1.037 | 1.135 | 0.850 | 1.141 | 43.86   | 7.55  | 13 | 15  | 1231 | 141.2 | 5.43 |
| E9PUB6   | Protein Fbrs1<br>OS=Mus musculus<br>GN=Fbrs1 PE=2 SV=1 - [E9PUB6_MOUSE]                                                 | 6.41  | 2  | 2  | 3  | 6   | 0.751 | 0.964 | 1.283 | 1.141 | 12.86   | 6.41  | 5  | 6   | 593  | 63.8  | 7.58 |
| P97825   | Hematological and neurological expressed 1 protein<br>OS=Mus musculus<br>GN=Hn1 PE=1 SV=3 - [HN1_MOUSE]                 | 41.56 | 1  | 4  | 4  | 45  | 1.824 | 1.654 | 1.456 | 1.142 | 178.83  | 41.56 | 7  | 45  | 154  | 16.1  | 5.31 |
| P15379-2 | Isoform 13 of CD44 antigen<br>OS=Mus musculus<br>GN=Cd44 - [CD44_MOUSE]                                                 | 18.73 | 21 | 5  | 5  | 7   | 1.302 | 1.398 | 0.951 | 1.142 | 18.45   | 18.73 | 7  | 7   | 363  | 40.0  | 5.92 |
| Q63870   | Collagen alpha-1(VII) chain<br>OS=Mus musculus<br>GN=Col7a1 PE=2 SV=3 - [CO7A1_MOUSE]                                   | 0.78  | 1  | 2  | 2  | 3   | 5.681 | 1.891 | 1.452 | 1.142 | 7.42    | 0.78  | 2  | 3   | 2944 | 295.1 | 6.34 |
| Q9DBK7   | MCG18845, isoform CRA_d<br>OS=Mus musculus<br>GN=Uba7 PE=2 SV=1 - [Q9DBK7_MOUSE]                                        | 4.20  | 2  | 3  | 3  | 4   | 0.882 | 1.426 | 0.975 | 1.142 | 4.78    | 4.20  | 3  | 4   | 977  | 108.6 | 5.97 |
| F6VEG4   | Lysosomal alpha-glucosidase (Fragment)<br>OS=Mus musculus<br>GN=Gaa PE=4 SV=1 - [F6VEG4_MOUSE]                          | 48.11 | 1  | 1  | 4  | 39  | 1.355 | 1.103 | 1.294 | 1.142 | 180.52  | 48.11 | 7  | 39  | 106  | 12.4  | 6.28 |

|          |                                                                                                                                        |       |   |    |    |     |        |       |       |       |         |       |    |     |      |       |       |
|----------|----------------------------------------------------------------------------------------------------------------------------------------|-------|---|----|----|-----|--------|-------|-------|-------|---------|-------|----|-----|------|-------|-------|
| G5E8J4   | Protein tyrosine phosphatase, non-receptor type 21, isoform CRA_a<br>OS=Mus musculus<br>GN=Ptpn21 PE=4 SV=1 - [PTPN21_MOUSE]           | 1.28  | 2 | 2  | 2  | 2   | 11.499 | 1.437 | 0.480 | 1.142 | 4.97    | 1.28  | 2  | 2   | 1176 | 133.4 | 7.85  |
| Q3TYW3   | Protein BC023829<br>OS=Mus musculus<br>GN=BC023829 PE=2 SV=1 - [Q3TYW3_MOUSE]                                                          | 2.80  | 3 | 1  | 1  | 2   | 0.574  | 0.819 | 1.122 | 1.142 | 5.50    | 2.80  | 2  | 2   | 322  | 37.2  | 7.20  |
| B2RY04   | Dedicator of cytokinesis protein 5<br>OS=Mus musculus<br>GN=Dock5 PE=1 SV=2 - [DOCK5_MOUSE]                                            | 7.76  | 1 | 11 | 13 | 26  | 1.464  | 0.947 | 0.947 | 1.142 | 51.96   | 7.76  | 22 | 26  | 1868 | 214.3 | 7.55  |
| A2ALK6   | Band 4.1-like protein 4B<br>OS=Mus musculus<br>GN=Epb4.1Hb PE=2 SV=1 - [A2ALK6_MOUSE]                                                  | 12.01 | 2 | 7  | 9  | 18  | 0.905  | 1.238 | 1.089 | 1.142 | 60.49   | 12.01 | 15 | 18  | 899  | 99.7  | 9.17  |
| Q78IK2   | Up-regulated during skeletal muscle growth protein 5<br>OS=Mus musculus<br>GN=Usmg5 PE=1 SV=1 - [USMG5_MOUSE]                          | 29.31 | 1 | 3  | 3  | 7   | 0.934  | 1.482 | 1.052 | 1.143 | 22.75   | 29.31 | 5  | 7   | 58   | 6.4   | 9.83  |
| Q07417   | Short-chain specific acyl-CoA dehydrogenase, mitochondrial<br>OS=Mus musculus<br>GN=Acads PE=2 SV=2 - [ACADS_MOUSE]                    | 43.69 | 2 | 14 | 14 | 34  | 0.988  | 1.030 | 0.990 | 1.143 | 101.26  | 43.69 | 22 | 34  | 412  | 44.9  | 8.47  |
| Q8BND3-2 | Isoform 2 of WD repeat-containing protein 35<br>OS=Mus musculus<br>GN=Wdr35 - [WDR35_MOUSE]                                            | 3.59  | 2 | 3  | 5  | 7   | 0.977  | 1.083 | 0.619 | 1.143 | 15.82   | 3.59  | 7  | 7   | 1170 | 132.7 | 6.58  |
| Q99MS8   | Tubulin polyglutamylase complex subunit 1<br>OS=Mus musculus<br>GN=Tpgs1 PE=1 SV=1 - [TPGS1_MOUSE]                                     | 35.97 | 1 | 8  | 8  | 20  | 1.036  | 1.220 | 0.906 | 1.143 | 69.46   | 35.97 | 15 | 20  | 303  | 32.6  | 8.94  |
| Q62432-2 | Isoform Short of Mothers against decapentaplegic homolog 2<br>OS=Mus musculus<br>GN=Smad2 - [SMAD2_MOUSE]                              | 21.97 | 8 | 4  | 8  | 21  | 1.462  | 1.164 | 0.996 | 1.143 | 57.70   | 21.97 | 13 | 21  | 437  | 48.9  | 7.09  |
| Q9DCD0   | 6-phosphogluconate dehydrogenase, decarboxylating<br>OS=Mus musculus<br>GN=Pgd PE=2 SV=3 - [6PGD_MOUSE]                                | 52.38 | 1 | 20 | 22 | 125 | 0.698  | 1.151 | 0.917 | 1.143 | 361.29  | 52.38 | 39 | 125 | 483  | 53.2  | 7.23  |
| O35326   | Serine/arginine-rich splicing factor 5<br>OS=Mus musculus<br>GN=Srsf5 PE=1 SV=2 - [SRSF5_MOUSE]                                        | 30.11 | 2 | 6  | 8  | 45  | 1.046  | 0.896 | 1.067 | 1.143 | 122.85  | 30.11 | 12 | 45  | 269  | 30.9  | 11.56 |
| O35129   | Prohibitin-2<br>OS=Mus musculus<br>GN=Phb2 PE=1 SV=1 - [PHB2_MOUSE]                                                                    | 69.90 | 3 | 24 | 24 | 158 | 0.758  | 0.924 | 0.982 | 1.143 | 463.26  | 69.90 | 43 | 158 | 299  | 33.3  | 9.83  |
| F6TFF2   | Pituitary tumor-transforming gene 1 protein-interacting protein (Fragment)<br>OS=Mus musculus<br>GN=Pttg1ip PE=4 SV=1 - [F6TFF2_MOUSE] | 18.02 | 3 | 3  | 3  | 6   | 1.028  | 1.099 | 1.067 | 1.143 | 12.55   | 18.02 | 4  | 6   | 172  | 19.8  | 8.68  |
| Q6GTL7   | 6-phosphofructo-2-kinase/fructose-2,6-biphosphatase 2<br>OS=Mus musculus<br>GN=Pfkfb2 PE=2 SV=1 - [Q6GTL7_MOUSE]                       | 44.40 | 4 | 18 | 21 | 49  | 0.903  | 0.955 | 0.977 | 1.143 | 137.18  | 44.40 | 37 | 49  | 518  | 59.8  | 8.12  |
| Q6P3N8   | DALR anticodon-binding domain-containing protein 3<br>OS=Mus musculus<br>GN=Dalrd3 PE=2 SV=1 - [DALD3_MOUSE]                           | 6.51  | 1 | 3  | 3  | 6   | 0.743  | 0.933 | 0.871 | 1.143 | 16.25   | 6.51  | 6  | 6   | 538  | 58.7  | 8.15  |
| Q66X19   | NACHT, LRR and PYD domains-containing protein 4E<br>OS=Mus musculus<br>GN=Nlrp4e PE=2 SV=2 - [NLRP4E_MOUSE]                            | 1.64  | 1 | 1  | 2  | 2   | 1.062  | 1.161 | 1.236 | 1.143 | 4.82    | 1.64  | 2  | 2   | 978  | 112.4 | 6.52  |
| Q149F3   | Eukaryotic peptide chain release factor GTP-binding subunit<br>ERF3B<br>OS=Mus musculus<br>GN=Cgpt2 PE=1 SV=1 - [ERF3B_MOUSE]          | 30.38 | 2 | 7  | 19 | 61  | 1.051  | 1.163 | 0.958 | 1.143 | 164.33  | 30.38 | 32 | 61  | 632  | 69.1  | 5.20  |
| Q3TWW4   | AP-2 complex subunit mu<br>OS=Mus musculus<br>GN=Ap2m1 PE=2 SV=1 - [Q3TWW4_MOUSE]                                                      | 66.28 | 2 | 31 | 31 | 289 | 0.493  | 1.051 | 1.174 | 1.143 | 832.99  | 66.28 | 55 | 289 | 433  | 49.4  | 9.54  |
| O08599   | Syntaxin-binding protein 1<br>OS=Mus musculus<br>GN=Sxbp1 PE=1 SV=2 - [STXB1_MOUSE]                                                    | 76.94 | 1 | 2  | 50 | 835 | 0.284  | 1.348 | 1.261 | 1.144 | 2453.51 | 76.94 | 91 | 835 | 594  | 67.5  | 6.96  |
| P54731   | FAS-associated factor 1<br>OS=Mus musculus<br>GN=Faf1 PE=1 SV=2 - [FAF1_MOUSE]                                                         | 29.12 | 1 | 16 | 16 | 36  | 1.206  | 0.981 | 0.976 | 1.144 | 90.71   | 29.12 | 27 | 36  | 649  | 73.8  | 4.86  |
| Q8BLV3   | Sodium/hydrogen exchanger 7<br>OS=Mus musculus<br>GN=Slc9a7 PE=2 SV=1 - [SLC9A7_MOUSE]                                                 | 10.19 | 2 | 6  | 6  | 31  | 0.726  | 0.750 | 0.907 | 1.144 | 71.02   | 10.19 | 11 | 31  | 726  | 80.2  | 6.40  |
| Q3V1L4   | Cytosolic purine 5'-nucleotidase<br>OS=Mus musculus<br>GN=Nt5c2 PE=1 SV=2 - [SNTC_MOUSE]                                               | 34.29 | 3 | 15 | 15 | 37  | 0.935  | 1.018 | 0.945 | 1.144 | 100.41  | 34.29 | 24 | 37  | 560  | 64.8  | 6.21  |
| Q6GYP7   | Ral GTPase-activating protein subunit alpha-1<br>OS=Mus musculus<br>GN=Ralgap1 PE=1 SV=1 [RGPA1_MOUSE]                                 | 15.82 | 6 | 26 | 28 | 84  | 0.749  | 0.945 | 1.067 | 1.144 | 230.30  | 15.82 | 46 | 84  | 2035 | 229.2 | 6.10  |
| P63030   | Mitochondrial pyruvate carrier 1<br>OS=Mus musculus<br>GN=Mpc1 PE=1 SV=1 - [MPC1_MOUSE]                                                | 39.45 | 5 | 4  | 4  | 20  | 0.805  | 0.963 | 1.146 | 1.144 | 54.24   | 39.45 | 8  | 20  | 109  | 12.4  | 9.61  |



|          |                                                                                                                          |       |    |    |    |     |       |       |       |       |         |       |    |     |      |       |      |
|----------|--------------------------------------------------------------------------------------------------------------------------|-------|----|----|----|-----|-------|-------|-------|-------|---------|-------|----|-----|------|-------|------|
| Q64378   | Peptidyl-prolyl cis-trans isomerase FKBP5 OS=Mus musculus GN=Fkbp5 PE=1 SV=1 - [FKBP5_MOUSE]                             | 26.10 | 2  | 10 | 10 | 30  | 0.842 | 1.433 | 1.193 | 1.144 | 82.73   | 26.10 | 15 | 30  | 456  | 50.9  | 7.80 |
| P58064   | 28S ribosomal protein S6, mitochondrial OS=Mus musculus GN=Mrps6 PE=2 SV=3 - [RT06_MOUSE]                                | 64.00 | 1  | 7  | 7  | 19  | 0.889 | 0.906 | 1.068 | 1.144 | 45.45   | 64.00 | 14 | 19  | 125  | 14.3  | 9.50 |
| E9Q070   | Uncharacterized protein OS=Mus musculus GN=Gm8730 PE=2 SV=1 - [E9Q070_MOUSE]                                             | 41.32 | 2  | 1  | 13 | 65  | 0.330 | 2.604 | 0.475 | 1.144 | 160.75  | 41.32 | 24 | 65  | 317  | 34.2  | 6.25 |
| H3BKGO   | Caveolin-1 OS=Mus musculus GN=Cav1 PE=2 SV=1 - [H3BKGO_MOUSE]                                                            | 54.84 | 6  | 4  | 6  | 28  | 0.917 | 1.874 | 1.097 | 1.144 | 59.37   | 54.84 | 10 | 28  | 93   | 10.4  | 6.05 |
| P51432   | 1-phosphatidylinositol 4,5-bisphosphate phosphodiesterase beta-3 OS=Mus musculus GN=Ptd3 PE=2 SV=2 - [PLCB3_MOUSE]       | 16.61 | 1  | 17 | 18 | 49  | 1.024 | 1.056 | 0.961 | 1.144 | 149.29  | 16.61 | 30 | 49  | 1234 | 139.4 | 5.94 |
| Q9D715-2 | Isoform 2 of Phosphotyrosine phosphohistidine inorganic pyrophosphate phosphatase OS=Mus musculus GN=Lhpp - [LHPP_MOUSE] | 33.47 | 2  | 5  | 5  | 14  | 1.589 | 0.917 | 1.088 | 1.144 | 35.35   | 33.47 | 10 | 14  | 242  | 26.0  | 5.69 |
| Q9Z320   | Keratin, type I cytoskeletal 27 OS=Mus musculus GN=Krt27 PE=1 SV=1 - [K1CZ7_MOUSE]                                       | 5.58  | 1  | 1  | 2  | 7   | 0.536 | 0.810 | 2.558 | 1.145 | 12.38   | 5.58  | 3  | 7   | 448  | 49.1  | 5.05 |
| F8VPV8   | Protein BC030307 OS=Mus musculus GN=BC030307 PE=2 SV=1 - [F8VPV8_MOUSE]                                                  | 5.54  | 5  | 4  | 5  | 12  | 1.111 | 1.282 | 1.372 | 1.145 | 21.50   | 5.54  | 6  | 12  | 1318 | 150.7 | 8.62 |
| Q9WV68   | Peroxisomal 2,4-dienoyl-CoA reductase OS=Mus musculus GN=Decr2 PE=1 SV=1 - [DECR2_MOUSE]                                 | 8.22  | 1  | 2  | 2  | 5   | 0.887 | 1.120 | 0.824 | 1.145 | 15.98   | 8.22  | 4  | 5   | 292  | 31.3  | 8.81 |
| P09411   | Phosphoglycerate kinase 1 OS=Mus musculus GN=Pgk1 PE=1 SV=4 - [PGK1_MOUSE]                                               | 87.53 | 5  | 36 | 36 | 584 | 0.864 | 1.179 | 1.087 | 1.145 | 1702.60 | 87.53 | 66 | 584 | 417  | 44.5  | 7.90 |
| Q9DA03   | Complex III assembly factor LYRM7 OS=Mus musculus GN=Lym7 PE=2 SV=2 - [LYRM7_MOUSE]                                      | 37.50 | 2  | 4  | 4  | 12  | 1.611 | 1.077 | 1.571 | 1.145 | 35.66   | 37.50 | 6  | 12  | 104  | 12.0  | 9.45 |
| Q6RKD8   | Fibronectin leucine rich transmembrane protein 1 OS=Mus musculus GN=Fit1 PE=2 SV=1 - [Q6RKD8_MOUSE]                      | 8.75  | 1  | 5  | 5  | 10  | 0.869 | 1.147 | 1.028 | 1.145 | 28.03   | 8.75  | 10 | 10  | 674  | 74.1  | 6.60 |
| Q8VCA8   | Secernin-2 OS=Mus musculus GN=Scrn2 PE=2 SV=1 - [SCRN2_MOUSE]                                                            | 20.47 | 2  | 5  | 5  | 10  | 1.684 | 1.241 | 1.120 | 1.145 | 34.61   | 20.47 | 9  | 10  | 425  | 46.6  | 5.71 |
| Q3TJ18   | Corticosteroid 11-beta-dehydrogenase isozyme 1 OS=Mus musculus GN=Hsd11b1 PE=2 SV=1 - [Q3TJ18_MOUSE]                     | 13.74 | 4  | 5  | 5  | 13  | 0.913 | 0.451 | 1.113 | 1.145 | 31.22   | 13.74 | 9  | 13  | 262  | 28.7  | 8.72 |
| E9PY14   | Uncharacterized protein OS=Mus musculus GN=Mroh8 PE=2 SV=1 - [E9PY14_MOUSE]                                              | 6.10  | 1  | 3  | 3  | 3   | 1.096 | 1.347 | 1.120 | 1.145 | 6.49    | 6.10  | 3  | 3   | 1049 | 119.4 | 8.21 |
| Q6NXM6   | Gene model 1008, (NCBI) OS=Mus musculus GN=Zfp663 PE=2 SV=1 - [Q6NXM6_MOUSE]                                             | 1.98  | 1  | 1  | 1  | 1   | 2.167 | 0.935 | 1.116 | 1.145 | 3.45    | 1.98  | 1  | 1   | 656  | 74.2  | 8.97 |
| F8VPM0   | Bromodomain adjacent to zinc finger domain protein 2A OS=Mus musculus GN=Baz2a PE=2 SV=1 - [F8VPM0_MOUSE]                | 2.91  | 5  | 3  | 4  | 5   | 0.370 | 0.838 | 0.983 | 1.145 | 14.11   | 2.91  | 4  | 5   | 1887 | 209.3 | 6.51 |
| P48193   | Protein 4.1 OS=Mus musculus GN=Epb41 PE=1 SV=2 - [41_MOUSE]                                                              | 39.04 | 9  | 16 | 26 | 92  | 0.856 | 1.064 | 0.863 | 1.146 | 251.05  | 39.04 | 41 | 92  | 858  | 95.9  | 5.60 |
| Q61563   | Fibroblast growth factor receptor OS=Mus musculus GN=Fgfr3 PE=2 SV=2 - [Q61563_MOUSE]                                    | 14.71 | 21 | 7  | 10 | 39  | 1.491 | 1.120 | 1.064 | 1.146 | 83.41   | 14.71 | 16 | 39  | 782  | 85.8  | 6.92 |
| Q9DCN2-2 | Isoform 2 of NADH-cytochrome b5 reductase 3 OS=Mus musculus GN=Cyb5r3 -                                                  | 61.15 | 4  | 14 | 14 | 94  | 0.817 | 1.379 | 0.897 | 1.146 | 233.29  | 61.15 | 26 | 94  | 278  | 31.5  | 8.38 |
| P70339   | Proto-oncogene FRAT1 OS=Mus musculus GN=Frat1 PE=1 SV=2 - [FRAT1_MOUSE]                                                  | 7.30  | 1  | 1  | 1  | 4   | 1.254 | 0.843 | 1.145 | 1.146 | 17.47   | 7.30  | 2  | 4   | 274  | 28.9  | 6.54 |
| Q91ZR1   | Ras-related protein Rab-4B OS=Mus musculus GN=Rab4b PE=2 SV=2 - [RAB4B_MOUSE]                                            | 52.11 | 1  | 7  | 10 | 72  | 0.735 | 0.736 | 0.969 | 1.146 | 203.16  | 52.11 | 19 | 72  | 213  | 23.6  | 6.06 |
| P97390   | Vacuolar protein sorting-associated protein 45 OS=Mus musculus GN=Vps45 PE=1 SV=1 - [VPS45_MOUSE]                        | 43.16 | 1  | 24 | 24 | 76  | 0.614 | 0.994 | 0.910 | 1.146 | 192.20  | 43.16 | 43 | 76  | 570  | 65.0  | 8.25 |
| Q8BPF6   | Peflin OS=Mus musculus GN=Pef1 PE=2 SV=1 - [PEF1_MOUSE]                                                                  | 15.64 | 1  | 5  | 5  | 22  | 0.963 | 1.669 | 1.126 | 1.146 | 51.27   | 15.64 | 10 | 22  | 275  | 29.2  | 6.30 |
| B1ART1   | Protein Vps13d OS=Mus musculus GN=Vps13d PE=2 SV=1 - [B1ART1_MOUSE]                                                      | 10.19 | 3  | 32 | 32 | 55  | 0.684 | 0.882 | 0.955 | 1.147 | 137.48  | 10.19 | 48 | 55  | 4359 | 487.0 | 6.49 |

|          |                                                                                                                                    |       |   |    |    |     |       |       |       |       |        |       |    |     |      |       |      |
|----------|------------------------------------------------------------------------------------------------------------------------------------|-------|---|----|----|-----|-------|-------|-------|-------|--------|-------|----|-----|------|-------|------|
| Q9QYK9   | Calcium/calmodulin-dependent protein kinase type 1B OS=Mus musculus GN=Pnck PE=2 SV=1 - [KCC1B_MOUSE]                              | 44.02 | 2 | 12 | 12 | 34  | 0.964 | 1.683 | 0.855 | 1.147 | 95.08  | 44.02 | 21 | 34  | 343  | 38.5  | 6.47 |
| Q80VP1   | Epsin-1 OS=Mus musculus GN=Epn1 PE=1 SV=3 - [EPN1_MOUSE]                                                                           | 34.78 | 3 | 12 | 14 | 74  | 1.180 | 1.636 | 1.620 | 1.147 | 197.82 | 34.78 | 24 | 74  | 575  | 60.2  | 4.81 |
| Q9QYB1   | Chloride intracellular channel protein 4 OS=Mus musculus GN=Clic4 PE=1 SV=3 - [CLIC4_MOUSE]                                        | 76.28 | 2 | 16 | 17 | 96  | 1.160 | 0.500 | 0.926 | 1.147 | 262.52 | 76.28 | 26 | 96  | 253  | 28.7  | 5.59 |
| Q3U3Q1-2 | Isoform 2 of Serine/threonine-protein kinase ULK3 OS=Mus musculus GN=Ulk3 - [ULK3_MOUSE]                                           | 11.89 | 2 | 4  | 4  | 7   | 1.365 | 0.772 | 0.993 | 1.147 | 24.94  | 11.89 | 5  | 7   | 471  | 53.3  | 7.36 |
| Q9Z1K6   | E3 ubiquitin-protein ligase ARIH2 OS=Mus musculus GN=Arih2 PE=2 SV=1 - [ARI2_MOUSE]                                                | 22.56 | 1 | 10 | 10 | 43  | 0.981 | 1.107 | 1.106 | 1.147 | 98.33  | 22.56 | 17 | 43  | 492  | 57.7  | 5.69 |
| Q8CHS8   | Vacuolar protein sorting-associated protein 37A OS=Mus musculus GN=Vps37a PE=2 SV=1 - [VP37A_MOUSE]                                | 18.14 | 3 | 6  | 7  | 15  | 1.632 | 1.112 | 1.250 | 1.147 | 44.78  | 18.14 | 10 | 15  | 397  | 44.4  | 5.67 |
| Q7T5S8   | Antigen presenting cell lectin-like receptor A2 OS=Mus musculus GN=Clec4b1 PE=2 SV=1 - [Q7T5S8_MOUSE]                              | 9.57  | 5 | 1  | 2  | 2   | 5.222 | 1.067 | 1.504 | 1.147 | 1.75   | 9.57  | 2  | 2   | 209  | 24.2  | 7.08 |
| D3YTZ7   | Josephin-2 OS=Mus musculus GN=Josd2 PE=2 SV=1 - [D3YTZ7_MOUSE]                                                                     | 31.51 | 4 | 3  | 3  | 14  | 0.836 | 0.307 | 0.872 | 1.147 | 21.15  | 31.51 | 5  | 14  | 146  | 16.1  | 5.49 |
| Q9DB75-2 | Isoform 2 of Cell death-inducing p53-target protein 1 OS=Mus musculus GN=Cdip1 - [CDIP1_MOUSE]                                     | 8.38  | 3 | 2  | 2  | 10  | 0.824 | 0.895 | 0.911 | 1.147 | 24.51  | 8.38  | 4  | 10  | 191  | 20.0  | 5.34 |
| Q91VN4   | Coiled-coil-helix-coiled-coil-helix domain-containing protein 6, mitochondrial OS=Mus musculus GN=Chchd6 PE=2 SV=2 - [CHCH6_MOUSE] | 54.21 | 1 | 3  | 16 | 107 | 1.396 | 0.952 | 1.192 | 1.147 | 349.42 | 54.21 | 25 | 107 | 273  | 29.8  | 8.41 |
| Q62465   | Synaptic vesicle membrane protein VAT-1 homolog OS=Mus musculus GN=Vat1 PE=1 SV=3 - [VAT1_MOUSE]                                   | 42.12 | 1 | 14 | 14 | 79  | 0.942 | 1.005 | 0.589 | 1.147 | 229.16 | 42.12 | 25 | 79  | 406  | 43.1  | 6.37 |
| Q9Z2D0   | Myotubularin-related protein 9 OS=Mus musculus GN=Mtmr9 PE=2 SV=2 -                                                                | 15.05 | 1 | 8  | 8  | 29  | 0.747 | 0.912 | 0.986 | 1.147 | 92.00  | 15.05 | 14 | 29  | 545  | 62.9  | 6.62 |
| F8VQ43   | Laminin subunit alpha-2 OS=Mus musculus GN=Lama2 PE=2 SV=1 - [F8VQ43_MOUSE]                                                        | 13.31 | 2 | 36 | 37 | 85  | 1.457 | 1.031 | 1.087 | 1.147 | 227.45 | 13.31 | 59 | 85  | 3118 | 343.6 | 6.09 |
| Q8K0S0   | Phytanoyl-CoA hydroxylase interacting protein OS=Mus musculus GN=Phyhip PE=1 SV=1 - [PHYIP_MOUSE]                                  | 33.94 | 2 | 10 | 12 | 103 | 0.727 | 2.061 | 1.682 | 1.147 | 312.08 | 33.94 | 21 | 103 | 330  | 37.5  | 7.01 |
| Q8B122-2 | Isoform 2 of Centrosomal protein of 128 kDa OS=Mus musculus GN=Cep128 -                                                            | 6.34  | 4 | 5  | 9  | 21  | 1.401 | 1.085 | 1.097 | 1.147 | 32.38  | 6.34  | 12 | 21  | 1026 | 120.1 | 6.39 |
| D3Z3B8   | Disks large homolog 1 OS=Mus musculus GN=Dlg1 PE=2 SV=1 - [D3Z3B8_MOUSE]                                                           | 47.84 | 2 | 2  | 31 | 224 | 0.514 | 1.317 | 1.886 | 1.147 | 608.03 | 47.84 | 56 | 224 | 834  | 91.6  | 6.34 |
| A2RTH5   | Leucine carboxyl methyltransferase 1 OS=Mus musculus GN=Lcmt1 PE=2 SV=1 -                                                          | 35.84 | 1 | 11 | 11 | 36  | 0.563 | 1.289 | 1.056 | 1.147 | 102.68 | 35.84 | 18 | 36  | 332  | 38.2  | 5.62 |
| Q8BVW0   | Neutral alpha-glucosidase C OS=Mus musculus GN=Ganc PE=2 SV=2 - [GANC_MOUSE]                                                       | 5.79  | 3 | 4  | 4  | 11  | 1.196 | 1.573 | 0.942 | 1.147 | 36.57  | 5.79  | 7  | 11  | 898  | 101.9 | 6.32 |
| Q08024-4 | Isoform 4 of Core-binding factor subunit beta OS=Mus musculus GN=Cbfb - [PEBB_MOUSE]                                               | 20.95 | 4 | 2  | 2  | 2   | 1.464 | 0.920 | 1.041 | 1.147 | 6.97   | 20.95 | 2  | 2   | 148  | 17.6  | 6.01 |
| Q78IK4   | Apolipoprotein O-like OS=Mus musculus GN=Apool PE=2 SV=1 - [APOOL_MOUSE]                                                           | 38.49 | 2 | 9  | 9  | 32  | 0.881 | 0.819 | 1.074 | 1.148 | 90.86  | 38.49 | 18 | 32  | 265  | 29.2  | 9.31 |
| G5E876   | Hect domain and RLD 3, isoform CRA_a OS=Mus musculus GN=Herc3 PE=4 SV=1 - [G5E876_MOUSE]                                           | 6.02  | 3 | 4  | 4  | 5   | 0.765 | 0.829 | 1.144 | 1.148 | 3.70   | 6.02  | 5  | 5   | 913  | 101.4 | 6.79 |
| Q8VG21   | Olfactory receptor 1195 OS=Mus musculus GN=Olfr1195 PE=3 SV=1 - [Q8VG21_MOUSE]                                                     | 2.60  | 2 | 1  | 1  | 1   | 3.428 | 1.241 | 1.675 | 1.148 | 2.31   | 2.60  | 1  | 1   | 308  | 34.8  | 8.05 |
| Q9D180   | WD repeat-containing protein 65 OS=Mus musculus GN=Wdr65 PE=2 SV=3 -                                                               | 4.96  | 1 | 5  | 7  | 10  | 1.680 | 0.976 | 1.266 | 1.148 | 20.02  | 4.96  | 7  | 10  | 1249 | 144.8 | 5.74 |
| Q9JLB9   | Poliovirus receptor-related protein 3 OS=Mus musculus GN=Pvr3 PE=1 SV=1 - [PVRL3_MOUSE]                                            | 15.12 | 2 | 7  | 7  | 14  | 1.360 | 1.636 | 1.035 | 1.148 | 39.79  | 15.12 | 11 | 14  | 549  | 60.5  | 6.54 |

|          |                                                                                                                                                              |       |   |    |    |     |       |       |       |       |         |       |    |     |      |       |      |
|----------|--------------------------------------------------------------------------------------------------------------------------------------------------------------|-------|---|----|----|-----|-------|-------|-------|-------|---------|-------|----|-----|------|-------|------|
| Q8CDJ3   | Beclin 1-associated autophagy-related key regulator OS=Mus musculus GN=Atg14 PE=1 SV=1 - [BAKOR_MOUSE]                                                       | 1.42  | 1 | 1  | 1  | 1   | 1.083 | 1.150 | 0.992 | 1.148 | 1.70    | 1.42  | 1  | 1   | 492  | 55.4  | 7.81 |
| Q91WA9   | ATP-binding cassette transporter ABCG4 OS=Mus musculus GN=Abcg4 PE=2 SV=2 - [Q91WA9_MOUSE]                                                                   | 5.11  | 2 | 2  | 3  | 5   | 0.841 | 0.751 | 1.056 | 1.148 | 9.10    | 5.11  | 4  | 5   | 646  | 72.1  | 8.19 |
| Q924M4   | Solute carrier family 12 member 6 OS=Mus musculus GN=Slc12a6 PE=1 SV=2 -                                                                                     | 15.30 | 5 | 9  | 15 | 79  | 0.758 | 0.849 | 1.060 | 1.148 | 212.42  | 15.30 | 26 | 79  | 1150 | 127.4 | 7.03 |
| P56392   | Cytochrome c oxidase subunit 7A1, mitochondrial OS=Mus musculus GN=Cox7a1 PE=2 SV=1 - [CX7A1_MOUSE]                                                          | 47.50 | 1 | 2  | 2  | 3   | 1.148 | 1.560 | 1.054 | 1.148 | 4.13    | 47.50 | 2  | 3   | 80   | 9.0   | 9.79 |
| Q8BJL0-2 | Isoform 2 of SWI/SNF-related matrix-associated actin-dependent regulator of chromatin subfamily A-like protein 1 OS=Mus musculus GN=Smarca11 - [SMAL1_MOUSE] | 10.41 | 6 | 5  | 5  | 19  | 0.829 | 0.746 | 1.059 | 1.148 | 52.05   | 10.41 | 9  | 19  | 788  | 87.1  | 9.74 |
| Q9WVA2   | Mitochondrial import inner membrane translocase subunit Tim8 A OS=Mus musculus GN=Timm8a1 PE=1 SV=1 - [TIM8A_MOUSE]                                          | 42.27 | 2 | 4  | 4  | 32  | 2.129 | 0.767 | 1.551 | 1.148 | 89.84   | 42.27 | 6  | 32  | 97   | 11.0  | 5.16 |
| G3UZ36   | Interferon-inducible protein AIM2 (Fragment) OS=Mus musculus GN=Aim2 PE=2 SV=1 - [G3UZ36_MOUSE]                                                              | 31.91 | 3 | 2  | 2  | 2   | 0.832 | 1.226 | 1.231 | 1.149 | 2.30    | 31.91 | 2  | 2   | 94   | 10.8  | 5.85 |
| P46686   | Tubby-related protein 2 OS=Mus musculus GN=Tulp2 PE=2 SV=3 - [TULF2_MOUSE]                                                                                   | 2.67  | 2 | 1  | 1  | 2   | 1.025 | 0.755 | 1.219 | 1.149 | 2.81    | 2.67  | 1  | 2   | 562  | 62.7  | 6.65 |
| Q8CHQ0   | F-box only protein 4 OS=Mus musculus GN=Fbxo4 PE=1 SV=2 - [FBX4_MOUSE]                                                                                       | 19.22 | 1 | 6  | 6  | 9   | 1.053 | 1.272 | 1.010 | 1.149 | 24.28   | 19.22 | 9  | 9   | 385  | 43.7  | 6.11 |
| Q8BYN3   | Inositol tetrakisphosphate 1-kinase OS=Mus musculus GN=Itpk1 PE=2 SV=1 - [ITPK1_MOUSE]                                                                       | 23.15 | 2 | 7  | 7  | 20  | 1.070 | 1.003 | 0.844 | 1.149 | 48.19   | 23.15 | 10 | 20  | 419  | 46.1  | 6.29 |
| P35802   | Neuronal membrane glycoprotein Me-a OS=Mus musculus GN=Gpm6a PE=1 SV=1 - [GPM6A_MOUSE]                                                                       | 29.50 | 1 | 7  | 8  | 109 | 0.501 | 1.670 | 1.210 | 1.149 | 258.17  | 29.50 | 13 | 109 | 278  | 31.1  | 5.27 |
| Q8CHC4   | Synaptotagmin-1 OS=Mus musculus GN=Synj1 PE=1 SV=3 - [SYNJ1_MOUSE]                                                                                           | 45.49 | 6 | 52 | 56 | 375 | 0.711 | 1.094 | 1.139 | 1.149 | 1067.24 | 45.49 | 97 | 375 | 1574 | 172.5 | 6.89 |
| P97315   | Cysteine and glycine-rich protein 1 OS=Mus musculus GN=Csrp1 PE=1 SV=3 - [CSR1_MOUSE]                                                                        | 66.84 | 2 | 15 | 15 | 212 | 1.702 | 0.946 | 1.588 | 1.149 | 753.56  | 66.84 | 26 | 212 | 193  | 20.6  | 8.57 |
| Q91V35   | Protein tyrosin phosphatase receptor type alpha OS=Mus musculus GN=Ptptra PE=2 SV=1 - [Q91V35_MOUSE]                                                         | 27.62 | 3 | 18 | 21 | 78  | 0.689 | 1.442 | 1.038 | 1.149 | 217.42  | 27.62 | 37 | 78  | 793  | 89.8  | 6.64 |
| A3KG59-2 | Isoform 2 of Peptidase M20 domain-containing protein 2 OS=Mus musculus GN=Pm20d2 - [P20D2_MOUSE]                                                             | 6.89  | 2 | 1  | 2  | 7   | 0.609 | 0.744 | 0.814 | 1.149 | 19.00   | 6.89  | 3  | 7   | 305  | 32.8  | 5.63 |
| Q8BZW8   | NHL repeat-containing protein 2 OS=Mus musculus GN=Nhlrc2 PE=2 SV=1 -                                                                                        | 20.97 | 1 | 12 | 12 | 31  | 1.419 | 1.034 | 1.149 | 1.149 | 90.10   | 20.97 | 20 | 31  | 725  | 78.4  | 5.54 |
| Q8CI33-2 | Isoform 2 of CWF19-like protein 1 OS=Mus musculus GN=Cwf19l1 - [C19L1_MOUSE]                                                                                 | 18.30 | 2 | 4  | 5  | 8   | 1.386 | 1.404 | 1.338 | 1.149 | 18.26   | 18.30 | 7  | 8   | 399  | 45.1  | 7.68 |
| B2RWE3   | CDGSH iron sulfur domain 3 OS=Mus musculus GN=Csd3 PE=2 SV=1 - [B2RWE3_MOUSE]                                                                                | 38.06 | 2 | 5  | 5  | 15  | 0.555 | 0.853 | 0.818 | 1.149 | 52.85   | 38.06 | 7  | 15  | 134  | 15.0  | 9.95 |
| Q8K126   | Peptide chain release factor 1, mitochondrial OS=Mus musculus GN=Ntrf1 PE=2 SV=1 - [RF1M_MOUSE]                                                              | 2.24  | 1 | 1  | 1  | 2   | 1.529 | 1.089 | 1.331 | 1.150 | 5.79    | 2.24  | 2  | 2   | 446  | 52.4  | 8.35 |
| P70236   | Dual specificity mitogen-activated protein kinase kinase 6 OS=Mus musculus GN=Map2k6 PE=1 SV=1 -                                                             | 38.32 | 2 | 9  | 11 | 56  | 0.754 | 1.264 | 1.266 | 1.150 | 171.43  | 38.32 | 20 | 56  | 334  | 37.4  | 7.39 |
| Q80Z17   | Sorting nexin-32 OS=Mus musculus GN=Smx32 PE=2 SV=1 - [SNX32_MOUSE]                                                                                          | 28.47 | 1 | 11 | 12 | 31  | 1.005 | 1.153 | 0.933 | 1.150 | 86.96   | 28.47 | 20 | 31  | 404  | 46.6  | 6.96 |
| Q8BJY1   | 26S proteasome non-ATPase regulatory subunit 5 OS=Mus musculus GN=Psm5 PE=1 SV=4 - [PSMD5_MOUSE]                                                             | 47.22 | 2 | 19 | 20 | 77  | 0.600 | 1.019 | 0.796 | 1.150 | 257.97  | 47.22 | 37 | 77  | 504  | 55.9  | 5.21 |
| A2AF65   | Dedicator of cytokinesis protein 11 OS=Mus musculus GN=Dock11 PE=2 SV=1 -                                                                                    | 10.63 | 1 | 1  | 6  | 11  | 1.422 | 0.903 | 0.898 | 1.150 | 23.63   | 10.63 | 8  | 11  | 527  | 61.0  | 7.85 |

|          |                                                                                                                               |       |   |    |    |     |       |       |       |       |         |       |     |     |      |       |      |
|----------|-------------------------------------------------------------------------------------------------------------------------------|-------|---|----|----|-----|-------|-------|-------|-------|---------|-------|-----|-----|------|-------|------|
| P97807-2 | Isoform Cytoplasmic of Fumarate hydratase, mitochondrial OS=Mus musculus GN=Fh -                                              | 76.45 | 3 | 28 | 29 | 413 | 1.535 | 1.022 | 0.989 | 1.150 | 1279.32 | 76.45 | 54  | 413 | 467  | 50.0  | 7.94 |
| Q8BMS1   | Trifunctional enzyme subunit alpha, mitochondrial OS=Mus musculus GN=Hadha PE=1 SV=1 -                                        | 61.73 | 1 | 38 | 39 | 182 | 0.813 | 0.883 | 0.875 | 1.150 | 528.47  | 61.73 | 68  | 182 | 763  | 82.6  | 9.14 |
| Q7TSE6   | Serine/threonine-protein kinase 38-like OS=Mus musculus GN=Shk38l PE=1 SV=2 - [ST38L_MOUSE]                                   | 23.92 | 2 | 8  | 9  | 23  | 1.025 | 0.954 | 1.252 | 1.150 | 60.69   | 23.92 | 15  | 23  | 464  | 53.7  | 6.96 |
| Q6P3E7   | Histone deacetylase 10 OS=Mus musculus GN=Hdac10 PE=2 SV=2 - [HDA10_MOUSE]                                                    | 1.65  | 1 | 1  | 1  | 2   | 0.730 | 0.828 | 0.907 | 1.150 | 5.28    | 1.65  | 2   | 2   | 666  | 72.1  | 5.39 |
| F6YUL1   | Cbp/p300-interacting transactivator 1 (Fragment) OS=Mus musculus GN=Cited1 PE=2 SV=1 -                                        | 29.66 | 4 | 2  | 2  | 2   | 1.990 | 1.400 | 1.224 | 1.150 | 6.45    | 29.66 | 2   | 2   | 118  | 12.0  | 9.64 |
| Q99K85   | Phosphoserine aminotransferase OS=Mus musculus GN=Psat1 PE=1 SV=1 - [SERC_MOUSE]                                              | 63.78 | 3 | 21 | 21 | 134 | 2.211 | 0.576 | 1.059 | 1.150 | 407.70  | 63.78 | 37  | 134 | 370  | 40.4  | 8.03 |
| Q9QYB5-2 | Isoform 1 of Gamma-adducin OS=Mus musculus GN=Add3 - [ADDG_MOUSE]                                                             | 36.65 | 1 | 2  | 21 | 132 | 0.981 | 1.018 | 1.283 | 1.150 | 325.10  | 36.65 | 36  | 132 | 674  | 75.4  | 6.34 |
| B1AY13   | Ubiquitin carboxyl-terminal hydrolase 24 OS=Mus musculus GN=Usp24 PE=1 SV=1 - [UBP24_MOUSE]                                   | 21.09 | 6 | 36 | 40 | 99  | 0.752 | 1.158 | 1.011 | 1.150 | 292.06  | 21.09 | 63  | 99  | 2617 | 293.8 | 6.19 |
| Q3TMV7   | Pyridine nucleotide-disulfide oxidoreductase domain-containing protein 1 OS=Mus musculus GN=Pyroxd1 PE=2 SV=1 - [PYRD1_MOUSE] | 4.02  | 1 | 2  | 2  | 3   | 0.925 | 0.938 | 0.962 | 1.150 | 5.02    | 4.02  | 3   | 3   | 498  | 55.6  | 5.33 |
| Q92426-2 | Isoform 2 of Exportin-6 OS=Mus musculus GN=Xpo6 - [XPO6_MOUSE]                                                                | 2.31  | 3 | 2  | 2  | 4   | 0.582 | 0.747 | 1.169 | 1.150 | 13.69   | 2.31  | 4   | 4   | 1124 | 128.5 | 6.37 |
| P84309   | Adenylate cyclase type 5 OS=Mus musculus GN=Adcy5 PE=1 SV=2 - [ADCY5_MOUSE]                                                   | 23.30 | 2 | 15 | 21 | 106 | 0.742 | 0.943 | 2.231 | 1.150 | 331.05  | 23.30 | 35  | 106 | 1262 | 139.0 | 7.06 |
| Q99M01   | Phenylalanine-tRNA ligase, mitochondrial OS=Mus musculus GN=Fars2 PE=2 SV=1 - [SYFM_MOUSE]                                    | 19.29 | 2 | 7  | 7  | 17  | 1.324 | 1.167 | 1.005 | 1.150 | 41.99   | 19.29 | 12  | 17  | 451  | 52.3  | 7.17 |
| Q9Z0V1-2 | Isoform 2 of Potassium voltage-gated channel subfamily D member 3 OS=Mus musculus GN=Kcnd3 - [KCNK3_MOUSE]                    | 18.24 | 3 | 8  | 10 | 35  | 0.850 | 1.091 | 1.168 | 1.150 | 114.26  | 18.24 | 14  | 35  | 636  | 71.4  | 8.25 |
| EQ401    | Ryanodine receptor 2 OS=Mus musculus GN=Ryr2 PE=1 SV=1 - [RZR2_MOUSE]                                                         | 20.66 | 3 | 76 | 84 | 242 | 0.676 | 1.799 | 1.561 | 1.151 | 719.85  | 20.66 | 142 | 242 | 4966 | 564.5 | 6.09 |
| D3Z0Q6   | Glycogen [starch] synthase, muscle OS=Mus musculus GN=Gys1 PE=2 SV=1 - [D3Z0Q6_MOUSE]                                         | 13.80 | 2 | 8  | 8  | 22  | 0.573 | 1.404 | 1.170 | 1.151 | 62.66   | 13.80 | 12  | 22  | 674  | 76.6  | 6.47 |
| Q921Q7   | Ras and Rab interactor 1 OS=Mus musculus GN=Rin1 PE=1 SV=1 - [RIN1_MOUSE]                                                     | 18.87 | 2 | 12 | 13 | 40  | 0.613 | 2.605 | 1.894 | 1.151 | 95.56   | 18.87 | 22  | 40  | 763  | 83.0  | 8.72 |
| Q3TCH7   | Cullin-4A OS=Mus musculus GN=Cul4a PE=1 SV=1 - [CUL4A_MOUSE]                                                                  | 36.63 | 3 | 17 | 27 | 71  | 0.727 | 1.146 | 1.006 | 1.151 | 186.82  | 36.63 | 44  | 71  | 759  | 87.7  | 8.35 |
| Q99KR3   | Beta-lactamase-like protein 2 OS=Mus musculus GN=Lactb2 PE=1 SV=1 -                                                           | 20.83 | 1 | 7  | 7  | 18  | 2.319 | 1.233 | 1.219 | 1.151 | 52.41   | 20.83 | 13  | 18  | 288  | 32.7  | 6.33 |
| Q61290   | Voltage-dependent R-type calcium channel subunit alpha-1E OS=Mus musculus GN=Cacna1e PE=1 SV=1 -                              | 14.17 | 2 | 20 | 25 | 81  | 0.730 | 1.494 | 1.791 | 1.151 | 279.01  | 14.17 | 39  | 81  | 2272 | 257.1 | 8.18 |
| Q9Z120   | tRNA (guanine-N(7))-methyltransferase OS=Mus musculus GN=Metw1 PE=2 SV=1 - [TRMB_MOUSE]                                       | 13.81 | 2 | 2  | 2  | 4   | 0.653 | 0.909 | 0.960 | 1.151 | 9.86    | 13.81 | 3   | 4   | 268  | 30.6  | 7.34 |
| Q8C8T7   | Protein ELFN1 OS=Mus musculus GN=Elfn1 PE=2 SV=1 - [ELFN1_MOUSE]                                                              | 24.88 | 1 | 13 | 16 | 39  | 0.677 | 1.300 | 1.547 | 1.151 | 131.51  | 24.88 | 26  | 39  | 828  | 90.8  | 8.18 |
| Q91V51   | Probable tubulin polyglutamylase TTL1 OS=Mus musculus GN=Ttl1 PE=1 SV=1 -                                                     | 7.80  | 2 | 2  | 2  | 2   | 0.665 | 1.063 | 1.048 | 1.151 | 7.94    | 7.80  | 2   | 2   | 423  | 49.1  | 8.72 |
| Q8K285   | FCH domain only protein 1 OS=Mus musculus GN=Fcho1 PE=1 SV=2 - [FCHO1_MOUSE]                                                  | 2.75  | 4 | 2  | 2  | 3   | 0.805 | 1.271 | 1.253 | 1.152 | 8.56    | 2.75  | 3   | 3   | 873  | 95.1  | 7.11 |
| Q9Z2U2-2 | Isoform 2 of Zinc finger protein 292 OS=Mus musculus GN=Zfp292 - [ZN292_MOUSE]                                                | 2.67  | 2 | 5  | 7  | 16  | 1.690 | 1.036 | 0.817 | 1.152 | 35.01   | 2.67  | 8   | 16  | 2693 | 300.3 | 7.56 |
| Q8R356   | Exocyst complex component 1 OS=Mus musculus GN=Exoc1 PE=2 SV=4 - [EXOC1_MOUSE]                                                | 32.44 | 3 | 1  | 26 | 82  | 0.638 | 0.531 | 0.729 | 1.152 | 221.58  | 32.44 | 44  | 82  | 894  | 101.8 | 6.52 |

|          |                                                                                                                  |       |    |    |    |     |       |       |       |       |        |       |    |     |      |       |       |
|----------|------------------------------------------------------------------------------------------------------------------|-------|----|----|----|-----|-------|-------|-------|-------|--------|-------|----|-----|------|-------|-------|
| Q9D051   | Pyruvate dehydrogenase E1 component subunit beta, mitochondrial OS=Mus musculus GN=Pdhb PE=1 SV=1 - [ODPB_MOUSE] | 61.84 | 1  | 16 | 16 | 301 | 0.896 | 1.116 | 1.130 | 1.152 | 912.37 | 61.84 | 28 | 301 | 359  | 38.9  | 6.87  |
| P50247   | Adenosylhomocysteinase OS=Mus musculus GN=Ahcy PE=1 SV=3 - [SAHH_MOUSE]                                          | 68.29 | 2  | 25 | 27 | 169 | 1.231 | 0.956 | 0.847 | 1.152 | 458.32 | 68.29 | 50 | 169 | 432  | 47.7  | 6.54  |
| P30548   | Substance-P receptor OS=Mus musculus GN=Tacr1 PE=2 SV=2 - [NK1R_MOUSE]                                           | 3.69  | 1  | 1  | 1  | 7   | 1.591 | 1.486 | 1.378 | 1.152 | 18.10  | 3.69  | 2  | 7   | 407  | 46.3  | 7.64  |
| Q5Q9Q6   | Oxysterol-binding protein 2 OS=Mus musculus GN=Osbp2 PE=2 SV=1 - [OSBP2_MOUSE]                                   | 10.35 | 4  | 4  | 8  | 17  | 0.709 | 1.079 | 1.121 | 1.152 | 42.21  | 10.35 | 12 | 17  | 908  | 101.3 | 7.14  |
| P43274   | Histone H1.4 OS=Mus musculus GN=Hist1h1e PE=1 SV=2 - [H14_MOUSE]                                                 | 49.77 | 3  | 6  | 20 | 128 | 0.366 | 1.080 | 1.045 | 1.152 | 304.10 | 49.77 | 37 | 128 | 219  | 22.0  | 11.11 |
| Q80U56   | Late secretory pathway protein AVL9 homolog OS=Mus musculus GN=Avl9 PE=2 SV=2 - [AVL9_MOUSE]                     | 33.28 | 1  | 15 | 15 | 74  | 0.606 | 1.183 | 1.057 | 1.152 | 166.60 | 33.28 | 27 | 74  | 649  | 72.1  | 6.14  |
| Q8CGP6   | Histone H2A type 1-H OS=Mus musculus GN=Hist1h2ah PE=1 SV=3 - [H2A1H_MOUSE]                                      | 58.59 | 7  | 2  | 5  | 184 | 1.159 | 1.130 | 1.012 | 1.152 | 387.73 | 58.59 | 10 | 184 | 128  | 13.9  | 11.03 |
| Q6P5E8   | Diacylglycerol kinase theta OS=Mus musculus GN=Dgkq PE=1 SV=1 - [DGKQ_MOUSE]                                     | 26.34 | 4  | 19 | 19 | 63  | 0.956 | 0.859 | 0.953 | 1.152 | 171.63 | 26.34 | 34 | 63  | 934  | 102.2 | 7.52  |
| Q9CWE0   | Mitochondrial fission regulator 1-like OS=Mus musculus GN=Mtfr1 PE=1 SV=1 - [MFR1L_MOUSE]                        | 41.87 | 5  | 9  | 9  | 52  | 1.326 | 0.898 | 1.476 | 1.153 | 158.97 | 41.87 | 16 | 52  | 289  | 31.7  | 6.10  |
| Q8R092-2 | Isoform 3 of Uncharacterized protein Clorf43 homolog OS=Mus musculus -                                           | 23.28 | 5  | 4  | 5  | 9   | 0.913 | 1.167 | 1.063 | 1.153 | 22.72  | 23.28 | 6  | 9   | 189  | 21.4  | 8.72  |
| E0CZE0   | NEDD8-activating enzyme E1 regulatory subunit OS=Mus musculus GN=Nae1 PE=2 SV=1 - [E0CZE0_MOUSE]                 | 25.29 | 2  | 12 | 12 | 45  | 0.891 | 0.961 | 0.970 | 1.153 | 118.45 | 25.29 | 19 | 45  | 510  | 57.6  | 5.85  |
| Q9EPL4   | Methyltransferase-like protein 9 OS=Mus musculus GN=Metf9 PE=2 SV=1 - [METL9_MOUSE]                              | 11.01 | 1  | 3  | 3  | 7   | 2.135 | 1.162 | 1.378 | 1.153 | 15.87  | 11.01 | 5  | 7   | 318  | 36.4  | 6.68  |
| Q05BH3   | Dhx16 protein OS=Mus musculus GN=Dhx16 PE=2 SV=1 - [Q05BH3_MOUSE]                                                | 7.15  | 2  | 3  | 4  | 11  | 1.543 | 1.302 | 1.255 | 1.153 | 24.94  | 7.15  | 5  | 11  | 741  | 84.0  | 6.55  |
| Q8BHW6   | Spermatogenesis-associated protein 21 OS=Mus musculus GN=Spata21 PE=2 SV=1 -                                     | 9.10  | 1  | 4  | 4  | 4   | 1.051 | 0.623 | 1.095 | 1.153 | 4.47   | 9.10  | 4  | 4   | 681  | 75.5  | 8.48  |
| P48760-2 | Isoform 2 of Folylpolylglutamate synthase, mitochondrial OS=Mus musculus GN=Fpqs - [FOLY_MOUSE]                  | 10.28 | 5  | 2  | 2  | 6   | 1.200 | 1.385 | 1.053 | 1.153 | 2.41   | 10.28 | 2  | 6   | 545  | 60.6  | 7.84  |
| Q9JMC3   | DnaJ homolog subfamily A member 4 OS=Mus musculus GN=Dnaja4 PE=2 SV=1 -                                          | 43.83 | 2  | 13 | 15 | 31  | 1.259 | 1.396 | 1.415 | 1.153 | 75.05  | 43.83 | 22 | 31  | 397  | 44.9  | 7.58  |
| P50285   | Dimethylaniline monooxygenase [N-oxide-forming] 1 OS=Mus musculus GN=Fmo1 PE=1 SV=1 - [FMO1_MOUSE]               | 17.48 | 3  | 6  | 6  | 11  | 0.864 | 1.657 | 0.814 | 1.153 | 29.53  | 17.48 | 10 | 11  | 532  | 59.9  | 8.47  |
| Q6P2B1   | Transportin-3 OS=Mus musculus GN=Tnpo3 PE=1 SV=1 - [TNPO3_MOUSE]                                                 | 16.36 | 4  | 11 | 12 | 36  | 0.670 | 1.586 | 1.039 | 1.153 | 111.49 | 16.36 | 23 | 36  | 923  | 104.1 | 5.57  |
| Q8CDA1   | Phosphatidylinositol phosphatase SAC2 OS=Mus musculus GN=Inpp5f PE=1 SV=1 - [SAC2_MOUSE]                         | 24.56 | 4  | 25 | 25 | 68  | 1.157 | 0.605 | 1.053 | 1.153 | 175.75 | 24.56 | 42 | 68  | 1132 | 127.5 | 7.11  |
| Q9J155   | Synaptic vesicle glycoprotein 2A OS=Mus musculus GN=Syv2a PE=1 SV=1 - [SV2A_MOUSE]                               | 21.29 | 1  | 17 | 17 | 171 | 0.783 | 1.087 | 1.120 | 1.154 | 489.60 | 21.29 | 30 | 171 | 742  | 82.6  | 5.57  |
| Q8R373   | CXADR-like membrane protein OS=Mus musculus GN=Cmp PE=1 SV=1 - [CLMP_MOUSE]                                      | 6.70  | 1  | 2  | 2  | 3   | 0.545 | 1.949 | 1.827 | 1.154 | 7.26   | 6.70  | 2  | 3   | 373  | 41.2  | 8.38  |
| P10833   | Ras-related protein R-Ras OS=Mus musculus GN=Rras PE=2 SV=1 - [RRAS_MOUSE]                                       | 34.86 | 1  | 4  | 7  | 49  | 1.157 | 1.114 | 1.093 | 1.154 | 132.07 | 34.86 | 13 | 49  | 218  | 23.7  | 6.79  |
| P62932   | F-box only protein 40 OS=Mus musculus GN=Fbxo40 PE=2 SV=1 - [FBX40_MOUSE]                                        | 1.55  | 1  | 1  | 1  | 4   | 0.731 | 1.304 | 0.989 | 1.154 | 3.32   | 1.55  | 1  | 4   | 710  | 79.9  | 6.92  |
| D3Z781   | Sickle tail protein OS=Mus musculus GN=Et4 PE=2 SV=2 - [D3Z781_MOUSE]                                            | 32.74 | 16 | 1  | 39 | 149 | 1.091 | 1.121 | 1.972 | 1.154 | 395.98 | 32.74 | 68 | 149 | 1347 | 146.5 | 9.25  |
| Q50H33   | BTB/POZ domain-containing protein KCTD8 OS=Mus musculus GN=Kctd8 PE=1 SV=1 - [KCTD8_MOUSE]                       | 23.53 | 2  | 9  | 11 | 35  | 0.410 | 0.400 | 0.861 | 1.154 | 102.91 | 23.53 | 19 | 35  | 476  | 52.7  | 8.38  |

|          |                                                                                                                      |       |   |    |     |       |       |       |       |        |         |       |     |      |      |       |       |
|----------|----------------------------------------------------------------------------------------------------------------------|-------|---|----|-----|-------|-------|-------|-------|--------|---------|-------|-----|------|------|-------|-------|
| Q9WVC2-2 | Isoform 2 of Ly-6/neurotoxin-like protein 1<br>OS=Mus musculus<br>GN=Lynx1 -                                         | 19.83 | 1 | 2  | 2   | 7     | 0.892 | 0.376 | 0.952 | 1.154  | 17.21   | 19.83 | 4   | 7    | 116  | 12.8  | 8.19  |
| Q8K596   | Protein Slc8a2 OS=Mus musculus<br>GN=Slc8a2<br>PE=2 SV=1 -<br>[Q8K596_MOUSE]                                         | 29.97 | 1 | 19 | 20  | 134   | 0.741 | 1.815 | 1.619 | 1.155  | 414.27  | 29.97 | 39  | 134  | 921  | 100.6 | 5.12  |
| Q9QZ06   | Toll-interacting protein<br>OS=Mus musculus<br>GN=Tollip PE=1 SV=1 -<br>[TOLLIP_MOUSE]                               | 45.99 | 4 | 10 | 10  | 103   | 1.300 | 1.022 | 1.029 | 1.155  | 314.01  | 45.99 | 18  | 103  | 274  | 30.3  | 5.17  |
| Q9CZJ2   | Heat shock 70 kDa protein 12B OS=Mus musculus<br>GN=Hspa12b PE=1 SV=1 -<br>[HS12B_MOUSE]                             | 24.38 | 2 | 12 | 15  | 48    | 0.941 | 1.235 | 1.028 | 1.155  | 122.57  | 24.38 | 26  | 48   | 685  | 76.1  | 8.47  |
| P52927   | High mobility group protein HMGI-C OS=Mus musculus<br>GN=Hmga2<br>PE=1 SV=1 -                                        | 32.41 | 2 | 2  | 2   | 3     | 2.788 | 4.293 | 3.987 | 1.155  | 5.42    | 32.41 | 2   | 3    | 108  | 11.8  | 10.62 |
| Q61626   | Glutamate receptor ionotropic, kainate 5 OS=Mus musculus<br>GN=Grik5 PE=2 SV=2 -<br>[GRIK5_MOUSE]                    | 5.52  | 1 | 4  | 5   | 6     | 0.784 | 2.078 | 1.186 | 1.155  | 18.53   | 5.52  | 6   | 6    | 979  | 109.2 | 8.21  |
| Q9D0S9   | Histidine triad nucleotide-binding protein 2, mitochondrial OS=Mus musculus<br>GN=Hint2 PE=2 SV=1 -<br>[HINT2_MOUSE] | 49.08 | 1 | 6  | 6   | 32    | 0.979 | 1.089 | 0.980 | 1.155  | 107.52  | 49.08 | 12  | 32   | 163  | 17.3  | 9.82  |
| K3W4N2   | Interleukin-18 OS=Mus musculus<br>GN=Il18 PE=3 SV=1 -<br>[K3W4N2_MOUSE]                                              | 20.31 | 2 | 3  | 3   | 3     | 1.439 | 0.961 | 1.261 | 1.155  | 8.01    | 20.31 | 3   | 3    | 192  | 22.1  | 4.91  |
| O08638   | Myosin-11 OS=Mus musculus<br>GN=Myl11<br>PE=1 SV=1 -<br>[MYH11_MOUSE]                                                | 45.03 | 4 | 3  | 96  | 488   | 0.888 | 2.275 | 1.205 | 1.155  | 1386.19 | 45.03 | 166 | 488  | 1972 | 226.9 | 5.45  |
| Q8BH70   | F-box/LRR-repeat protein 4 OS=Mus musculus<br>GN=Fbx4 PE=2 SV=1 -<br>[FBXL4_MOUSE]                                   | 13.69 | 1 | 6  | 6   | 13    | 1.215 | 0.875 | 0.934 | 1.155  | 36.88   | 13.69 | 11  | 13   | 621  | 70.2  | 6.37  |
| E5CY99   | Protein unc-79 homolog OS=Mus musculus<br>GN=Unc79 PE=2 SV=1 -<br>[E5CY99_MOUSE]                                     | 1.21  | 4 | 3  | 3   | 5     | 1.275 | 1.014 | 1.158 | 1.155  | 10.13   | 1.21  | 5   | 5    | 2654 | 297.1 | 6.39  |
| A6Z144   | Fructose-bisphosphate aldolase OS=Mus musculus<br>GN=Aldoa PE=2 SV=1 -<br>[A6Z144_MOUSE]                             | 79.67 | 5 | 6  | 35  | 1834  | 1.242 | 1.151 | 1.066 | 1.156  | 5613.81 | 79.67 | 63  | 1834 | 418  | 45.1  | 7.91  |
| Q6NWW3   | Intraflagellar transport protein 122 homolog OS=Mus musculus<br>GN=Ifi122 PE=2 SV=1 -<br>[IFI122_MOUSE]              | 5.33  | 3 | 5  | 5   | 8     | 0.650 | 1.104 | 0.951 | 1.156  | 27.83   | 5.33  | 8   | 8    | 1182 | 134.7 | 6.98  |
| Q3U2V3   | 8-oxo-dGDP phosphatase NUDT18 OS=Mus musculus<br>GN=Nudt18<br>PE=2 SV=1 -                                            | 17.03 | 2 | 4  | 4   | 7     | 0.527 | 1.100 | 1.006 | 1.156  | 18.35   | 17.03 | 7   | 7    | 323  | 35.7  | 6.62  |
| A6H6A9   | Rab GTPase-activating protein 1-like OS=Mus musculus<br>GN=Rabgap1l<br>PE=1 SV=1 -<br>[RBG1L_MOUSE]                  | 15.58 | 3 | 8  | 14  | 41    | 1.021 | 1.320 | 1.209 | 1.156  | 104.79  | 15.58 | 23  | 41   | 815  | 92.3  | 5.31  |
| Q9WUE4   | Nitrogen permease regulator 2-like protein OS=Mus musculus<br>GN=Npri2 PE=2 SV=1 -<br>[NPR12_MOUSE]                  | 10.00 | 1 | 2  | 2   | 2     | 1.184 | 0.964 | 0.967 | 1.156  | 6.32    | 10.00 | 2   | 2    | 380  | 43.6  | 6.67  |
| Q8CHT0   | Delta-1-pyrroline-5-carboxylate dehydrogenase, mitochondrial OS=Mus musculus<br>GN=Aldh1a1<br>PE=1 SV=2 -            | 43.59 | 2 | 23 | 107 | 0.676 | 1.533 | 0.880 | 1.156 | 332.94 | 43.59   | 40    | 107 | 562  | 61.8 | 8.24  |       |
| Q3URS9-2 | Isoform 2 of Coiled-coil domain-containing protein 51 OS=Mus musculus<br>GN=Ccd51 -<br>[CCD51_MOUSE]                 | 27.20 | 2 | 8  | 8   | 35    | 0.987 | 1.212 | 1.268 | 1.156  | 132.81  | 27.20 | 13  | 35   | 375  | 41.7  | 7.56  |
| Q3UVK0   | Endoplasmic reticulum metallopeptidase 1 OS=Mus musculus<br>GN=Ermp1 PE=1 SV=2 -<br>[ERMP1_MOUSE]                    | 14.59 | 4 | 9  | 9   | 24    | 0.703 | 0.855 | 0.884 | 1.156  | 75.53   | 14.59 | 15  | 24   | 898  | 100.1 | 7.49  |
| P38647   | Stress-70 protein, mitochondrial OS=Mus musculus<br>GN=Hspa9 PE=1 SV=3 -<br>[GRP75_MOUSE]                            | 61.71 | 1 | 38 | 39  | 501   | 1.290 | 1.010 | 1.202 | 1.156  | 1538.68 | 61.71 | 72  | 501  | 679  | 73.4  | 6.07  |
| E9PWY6   | 2-amino-3-ketobutyrate coenzyme A ligase, mitochondrial OS=Mus musculus<br>GN=Ccat PE=2 SV=1 -<br>[E9PWY6_MOUSE]     | 38.74 | 2 | 9  | 9   | 21    | 1.245 | 1.204 | 0.867 | 1.156  | 79.37   | 38.74 | 15  | 21   | 382  | 41.3  | 7.91  |
| O70481   | E3 ubiquitin-protein ligase UBR1 OS=Mus musculus<br>GN=Ubr1 PE=1 SV=2 -<br>[UBR1_MOUSE]                              | 12.58 | 1 | 17 | 17  | 33    | 0.889 | 0.985 | 1.057 | 1.156  | 105.62  | 12.58 | 27  | 33   | 1757 | 200.1 | 6.05  |
| Q9D8W7   | Oc1A domain-containing protein 2 OS=Mus musculus<br>GN=Ociad2<br>PE=2 SV=1 -                                         | 17.53 | 1 | 3  | 3   | 14    | 0.987 | 1.680 | 1.305 | 1.156  | 42.59   | 17.53 | 5   | 14   | 154  | 16.9  | 9.41  |
| Q60613   | Adenosine receptor A2a OS=Mus musculus<br>GN=Adora2a PE=2 SV=3 -<br>[AA2AR_MOUSE]                                    | 2.68  | 1 | 1  | 1   | 2     | 1.676 | 0.943 | 6.648 | 1.156  | 5.88    | 2.68  | 2   | 2    | 410  | 44.9  | 8.43  |
| Q9Z110-2 | Isoform Short of Delta-1-pyrroline-5-carboxylate synthase OS=Mus musculus<br>GN=Aldh18a1 -<br>[P5CS_MOUSE]           | 30.64 | 5 | 20 | 20  | 63    | 0.728 | 0.979 | 0.955 | 1.156  | 188.64  | 30.64 | 34  | 63   | 793  | 87.0  | 7.55  |

|          |                                                                                                                                    |       |    |    |    |     |       |       |       |       |         |       |     |     |      |       |      |
|----------|------------------------------------------------------------------------------------------------------------------------------------|-------|----|----|----|-----|-------|-------|-------|-------|---------|-------|-----|-----|------|-------|------|
| D3Z4N1   | Rhotekin (Fragment)<br>OS=Mus musculus<br>GN=Rtkn PE=2 SV=1 -<br>[D3Z4N1_MOUSE]                                                    | 31.34 | 2  | 1  | 6  | 11  | 1.378 | 0.688 | 0.815 | 1.156 | 30.70   | 31.34 | 9   | 11  | 217  | 24.0  | 6.35 |
| Q04519   | Sphingomyelin<br>phosphodiesterase<br>OS=Mus musculus<br>GN=Smpd1 PE=2 SV=2 -<br>[Q04519_MOUSE]                                    | 9.41  | 1  | 6  | 6  | 11  | 0.964 | 1.433 | 1.128 | 1.157 | 33.18   | 9.41  | 9   | 11  | 627  | 69.9  | 7.20 |
| F8VPM4   | Protein Agl OS=Mus<br>musculus GN=Agl PE=4<br>SV=1 - [F8VPM4_MOUSE]                                                                | 38.90 | 5  | 45 | 47 | 153 | 0.766 | 0.950 | 0.976 | 1.157 | 493.20  | 38.90 | 83  | 153 | 1532 | 174.2 | 6.74 |
| P08032   | Spectrin alpha chain,<br>erythrocytic 1 OS=Mus<br>musculus GN=Spta1 PE=2<br>SV=3 - [SPTA1_MOUSE]                                   | 43.35 | 3  | 82 | 84 | 302 | 2.768 | 1.785 | 0.696 | 1.157 | 913.90  | 43.35 | 138 | 302 | 2415 | 279.7 | 5.03 |
| Q6PAV2-2 | Isoform 2 of Probable E3<br>ubiquitin-protein ligase<br>HERC4 OS=Mus musculus<br>GN=Herc4 -<br>[HERC4_MOUSE]                       | 17.06 | 3  | 16 | 16 | 36  | 1.022 | 1.300 | 1.110 | 1.157 | 99.47   | 17.06 | 26  | 36  | 1049 | 117.5 | 6.37 |
| Q99JB2   | Stomatin-like protein 2,<br>mitochondrial OS=Mus<br>musculus GN=Stoml2<br>PE=1 SV=1 -<br>[STML2_MOUSE]                             | 55.24 | 4  | 15 | 15 | 79  | 1.057 | 1.221 | 1.070 | 1.157 | 194.47  | 55.24 | 25  | 79  | 353  | 38.4  | 8.87 |
| Q8BUM3   | Tyrosine-protein<br>phosphatase non-receptor<br>type 7 OS=Mus musculus<br>GN=Ptpn7 PE=1 SV=1 -<br>[PTN7_MOUSE]                     | 2.23  | 1  | 1  | 1  | 3   | 2.851 | 0.950 | 0.980 | 1.157 | 8.66    | 2.23  | 1   | 3   | 359  | 40.3  | 6.70 |
| F7A6H4   | E3 ubiquitin-protein ligase<br>RNF213 OS=Mus musculus<br>GN=Rnf213 PE=4 SV=2 -<br>[F7A6H4_MOUSE]                                   | 1.67  | 3  | 7  | 7  | 9   | 1.193 | 1.187 | 1.161 | 1.157 | 12.24   | 1.67  | 8   | 9   | 5152 | 584.4 | 6.80 |
| E9PX29   | Protein Sptbn4 OS=Mus<br>musculus GN=Sptbn4<br>PE=2 SV=1 -<br>[E9PX29_MOUSE]                                                       | 39.48 | 13 | 75 | 82 | 305 | 0.857 | 0.829 | 1.428 | 1.157 | 912.26  | 39.48 | 140 | 305 | 2561 | 288.6 | 6.00 |
| D3Z1D7   | Protein Gprin2 OS=Mus<br>musculus GN=Gprin2<br>PE=4 SV=1 -<br>[D3Z1D7_MOUSE]                                                       | 17.36 | 1  | 4  | 4  | 13  | 1.032 | 0.913 | 0.870 | 1.157 | 25.51   | 17.36 | 7   | 13  | 455  | 47.0  | 6.40 |
| P52633   | Signal transducer and<br>transcription activator 6<br>OS=Mus musculus<br>GN=Stat6 PE=2 SV=2 -<br>[STAT6_MOUSE]                     | 1.67  | 1  | 1  | 2  | 2   | 1.246 | 1.233 | 0.970 | 1.157 | 4.32    | 1.67  | 2   | 2   | 837  | 93.4  | 6.23 |
| Q8CC88   | von Willebrand factor A<br>domain-containing protein<br>8 OS=Mus musculus<br>GN=Vwa8 PE=2 SV=2 -<br>[VWA8_MOUSE]                   | 30.76 | 3  | 49 | 49 | 128 | 0.840 | 0.787 | 0.881 | 1.157 | 374.38  | 30.76 | 83  | 128 | 1905 | 213.3 | 6.60 |
| Q8VHQ9   | Acyl-coenzyme A<br>thioesterase 11 OS=Mus<br>musculus GN=Acot11<br>PE=2 SV=1 -<br>[Q8VHQ9_MOUSE]                                   | 31.99 | 6  | 16 | 16 | 56  | 0.747 | 0.630 | 0.899 | 1.157 | 171.33  | 31.99 | 28  | 56  | 594  | 67.3  | 6.80 |
| Q9R1C6   | Diacylglycerol kinase<br>epsilon OS=Mus musculus<br>GN=Dgke PE=2 SV=1 -<br>[DGKE_MOUSE]                                            | 16.31 | 2  | 9  | 9  | 25  | 0.718 | 1.137 | 1.202 | 1.158 | 69.35   | 16.31 | 15  | 25  | 564  | 63.6  | 7.44 |
| Q9J1Z8   | Protein flightless-1<br>homolog OS=Mus<br>musculus GN=Flil PE=1<br>SV=1 - [FLIL_MOUSE]                                             | 20.69 | 1  | 24 | 24 | 55  | 0.772 | 0.916 | 1.077 | 1.158 | 175.52  | 20.69 | 38  | 55  | 1271 | 144.7 | 6.06 |
| P59267   | Palmitoyltransferase<br>ZDHHc2 OS=Mus<br>musculus GN=Zdhhc2<br>PE=2 SV=1 -<br>[P59267_MOUSE]                                       | 11.75 | 1  | 3  | 5  | 10  | 1.633 | 0.765 | 0.986 | 1.158 | 20.18   | 11.75 | 7   | 10  | 366  | 42.0  | 8.48 |
| Q6XP57   | L-threonine aldolase<br>OS=Mus musculus<br>GN=Tha1 PE=2 SV=1 -<br>[Q6XP57_MOUSE]                                                   | 5.50  | 1  | 2  | 2  | 4   | 0.693 | 1.572 | 0.940 | 1.158 | 12.67   | 5.50  | 4   | 4   | 400  | 43.5  | 7.20 |
| E9Q8Y7   | Sarcospan OS=Sepn<br>musculus GN=Sepn PE=4<br>SV=1 - [E9Q8Y7_MOUSE]                                                                | 6.43  | 3  | 1  | 1  | 2   | 1.184 | 0.892 | 1.044 | 1.158 | 3.57    | 6.43  | 1   | 2   | 140  | 15.7  | 7.81 |
| Q9JL16   | Selenocysteine lyase<br>OS=Mus musculus<br>GN=Scly PE=1 SV=1 -<br>[SCLY_MOUSE]                                                     | 25.93 | 8  | 9  | 9  | 34  | 1.864 | 0.986 | 1.008 | 1.158 | 97.85   | 25.93 | 15  | 34  | 432  | 47.1  | 6.80 |
| Q99P58   | Ras-related protein Rab-<br>27B OS=Mus musculus<br>GN=Rab27b PE=1 SV=3 -<br>[RB27B_MOUSE]                                          | 36.70 | 1  | 5  | 6  | 33  | 1.899 | 0.988 | 0.984 | 1.158 | 105.46  | 36.70 | 12  | 33  | 218  | 24.5  | 5.54 |
| E9Q056   | Protein Tns1 OS=Mus<br>musculus GN=Tns1 PE=2<br>SV=1 - [E9Q056_MOUSE]                                                              | 33.74 | 1  | 35 | 38 | 169 | 1.508 | 1.513 | 1.126 | 1.158 | 505.21  | 33.74 | 67  | 169 | 1888 | 201.3 | 7.75 |
| Q6NT99   | Dual specificity protein<br>phosphatase 23 OS=Mus<br>musculus GN=Dusp23<br>PE=2 SV=1 -<br>[Q6NT99_MOUSE]                           | 31.33 | 1  | 4  | 4  | 9   | 1.223 | 1.207 | 1.198 | 1.158 | 29.18   | 31.33 | 7   | 9   | 150  | 16.6  | 8.21 |
| D3YXN7   | Tetraspanin-9 (Fragment)<br>OS=Mus musculus<br>GN=Tspan9 PE=2 SV=1 -<br>[D3YXN7_MOUSE]                                             | 15.12 | 2  | 2  | 2  | 10  | 1.357 | 1.132 | 0.984 | 1.158 | 18.78   | 15.12 | 4   | 10  | 172  | 19.1  | 4.93 |
| A1L341   | Dual-specificity tyrosine-<br>phosphorylation-regulated<br>kinase 1A OS=Mus<br>musculus GN=Dyrk1a<br>PE=2 SV=1 -<br>[A1L341_MOUSE] | 20.03 | 4  | 9  | 11 | 27  | 1.342 | 1.136 | 1.227 | 1.158 | 80.02   | 20.03 | 17  | 27  | 754  | 84.4  | 8.82 |
| P05201   | Aspartate<br>aminotransferase,<br>cytoplasmic OS=Mus<br>musculus GN=Got1 PE=1<br>SV=3 - [AATC_MOUSE]                               | 75.54 | 2  | 30 | 30 | 815 | 1.997 | 1.038 | 0.907 | 1.158 | 2203.85 | 75.54 | 54  | 815 | 413  | 46.2  | 7.14 |

|          |                                                                                                                      |       |   |    |    |     |       |       |       |       |         |       |    |     |      |       |       |
|----------|----------------------------------------------------------------------------------------------------------------------|-------|---|----|----|-----|-------|-------|-------|-------|---------|-------|----|-----|------|-------|-------|
| 054865   | Guanylate cyclase soluble subunit beta-1 OS=Mus musculus GN=Gucy1b3 PE=2 SV=1 - [GCYB1_MOUSE]                        | 38.87 | 3 | 27 | 27 | 97  | 0.593 | 1.242 | 1.258 | 1.158 | 269.74  | 38.87 | 50 | 97  | 620  | 70.6  | 5.31  |
| Q8CH18-5 | Isoform 5 of E1A-binding protein p400 OS=Mus musculus GN=Ep400 - [EP400_MOUSE]                                       | 6.29  | 6 | 10 | 13 | 40  | 0.841 | 0.888 | 1.173 | 1.158 | 79.15   | 6.29  | 19 | 40  | 2909 | 318.0 | 9.11  |
| Q5SRX1-2 | Isoform 2 of TOM1-like protein 2 OS=Mus musculus GN=Tom1l2 - [TM1L2_MOUSE]                                           | 48.67 | 9 | 15 | 15 | 158 | 1.661 | 1.225 | 1.247 | 1.159 | 556.19  | 48.67 | 27 | 158 | 487  | 53.3  | 4.87  |
| Q3V3V9-2 | Isoform 2 of Leucine-rich repeat-containing protein 16C OS=Mus musculus GN=Rltr - [LR16C_MOUSE]                      | 26.29 | 2 | 12 | 12 | 71  | 1.225 | 0.938 | 1.531 | 1.159 | 220.35  | 26.29 | 22 | 71  | 738  | 79.7  | 6.77  |
| Q8VD72-2 | Isoform 2 of Tetratricopeptide repeat protein 8 OS=Mus musculus GN=Ttc8 -                                            | 2.57  | 2 | 1  | 2  | 6   | 0.979 | 1.086 | 1.049 | 1.159 | 10.04   | 2.57  | 4  | 6   | 505  | 57.4  | 7.20  |
| Q8K07    | Protein unc-13 homolog C OS=Mus musculus GN=Unc13c PE=1 SV=3 - [UN13C_MOUSE]                                         | 12.04 | 1 | 18 | 25 | 57  | 0.811 | 0.697 | 1.177 | 1.159 | 148.64  | 12.04 | 38 | 57  | 2210 | 249.7 | 6.07  |
| Q9D8B4   | NADH dehydrogenase [ubiquinone] 1 alpha subcomplex subunit 11 OS=Mus musculus GN=Ndufa11 PE=2 SV=2 - [NDUFA11_MOUSE] | 32.62 | 2 | 2  | 2  | 3   | 1.618 | 1.134 | 1.008 | 1.159 | 11.60   | 32.62 | 3  | 3   | 141  | 15.0  | 8.35  |
| P50516   | V-type proton ATPase catalytic subunit A OS=Mus musculus GN=Atp6v1a PE=1 SV=2 - [VATA_MOUSE]                         | 84.93 | 5 | 47 | 47 | 949 | 0.928 | 1.228 | 1.122 | 1.159 | 2847.02 | 84.93 | 83 | 949 | 617  | 68.3  | 5.58  |
| Q8BZN6   | Dedicator of cytokinesis protein 10 OS=Mus musculus GN=Dock10 PE=1 SV=3 -                                            | 15.91 | 4 | 29 | 29 | 58  | 0.924 | 0.868 | 1.072 | 1.159 | 169.10  | 15.91 | 44 | 58  | 2150 | 245.6 | 7.05  |
| G3UZJ7   | Protein Obox3 (Fragment) OS=Mus musculus GN=Obox3 PE=2 SV=1 - [G3UZJ7_MOUSE]                                         | 11.92 | 4 | 1  | 2  | 2   | 0.841 | 0.648 | 0.961 | 1.159 | 5.38    | 11.92 | 2  | 2   | 151  | 17.5  | 10.10 |
| Q9DBC0   | Selenoprotein O OS=Mus musculus GN=Selo PE=1 SV=4 - [SELO_MOUSE]                                                     | 22.34 | 1 | 11 | 11 | 22  | 0.868 | 0.888 | 0.941 | 1.159 | 59.40   | 22.34 | 17 | 22  | 667  | 74.2  | 5.83  |
| Q91X7    | Tyrosyl-DNA phosphodiesterase 2 OS=Mus musculus GN=Tdp2 PE=1 SV=1 -                                                  | 7.03  | 1 | 2  | 2  | 2   | 1.052 | 1.120 | 1.009 | 1.159 | 4.78    | 7.03  | 2  | 2   | 370  | 41.0  | 5.50  |
| Q7TT21   | Tuberin OS=Mus musculus GN=Tsc2 PE=2 SV=1 - [Q7TT21_MOUSE]                                                           | 19.29 | 3 | 3  | 25 | 80  | 0.728 | 1.460 | 1.090 | 1.160 | 220.89  | 19.29 | 44 | 80  | 1742 | 194.0 | 6.89  |
| Q8BTE0   | UPF0369 protein C6orf57 homolog OS=Mus musculus PE=2 SV=2 - [CF057_MOUSE]                                            | 9.62  | 1 | 1  | 1  | 1   | 0.920 | 1.196 | 1.094 | 1.160 | 3.07    | 9.62  | 1  | 1   | 104  | 11.9  | 9.50  |
| P21279   | Guanine nucleotide-binding protein G(q) subunit alpha OS=Mus musculus GN=Gnaq PE=1 SV=4 - [GNAQ_MOUSE]               | 54.04 | 1 | 10 | 18 | 132 | 0.719 | 1.007 | 0.980 | 1.160 | 357.88  | 54.04 | 31 | 132 | 359  | 42.1  | 5.68  |
| P97499   | Telomerase protein component 1 OS=Mus musculus GN=Tepl1 PE=1 SV=1 - [TEP1_MOUSE]                                     | 2.32  | 1 | 3  | 4  | 9   | 1.095 | 0.940 | 1.162 | 1.160 | 16.41   | 2.32  | 4  | 9   | 2629 | 291.3 | 7.24  |
| Q9DBS2   | Tumor protein p63-regulated gene 1-like protein OS=Mus musculus GN=Tprgl1 PE=1 SV=1 - [TPRGL_MOUSE]                  | 50.38 | 2 | 9  | 9  | 74  | 0.774 | 1.365 | 1.084 | 1.160 | 163.87  | 50.38 | 17 | 74  | 266  | 29.8  | 7.37  |
| Q4PZA2-3 | Isoform C of Endothelin-converting enzyme 1 OS=Mus musculus GN=Ece1 -                                                | 7.30  | 4 | 5  | 5  | 11  | 1.058 | 1.269 | 0.858 | 1.160 | 39.75   | 7.30  | 9  | 11  | 753  | 85.4  | 5.82  |
| G3UVU9   | Bifunctional arginine demethylase and lysyl-hydroxylase JMJD6 OS=Mus musculus GN=Jmjd6 PE=4 SV=1 - [JMJD6_MOUSE]     | 11.11 | 5 | 2  | 2  | 4   | 2.075 | 0.978 | 0.984 | 1.160 | 10.62   | 11.11 | 3  | 4   | 270  | 32.0  | 9.28  |
| D3Z1K9   | Protein Tct18 OS=Mus musculus GN=Tct18 PE=2 SV=2 - [D3Z1K9_MOUSE]                                                    | 1.91  | 2 | 1  | 1  | 1   | 2.501 | 1.227 | 1.126 | 1.160 | 3.80    | 1.91  | 1  | 1   | 1097 | 123.0 | 5.52  |
| Q99KF0   | Caspase recruitment domain-containing protein 14 OS=Mus musculus GN=Card14 PE=2 SV=2 - [CAR14_MOUSE]                 | 3.50  | 1 | 2  | 2  | 6   | 1.003 | 0.689 | 1.412 | 1.160 | 2.64    | 3.50  | 2  | 6   | 999  | 113.4 | 6.10  |
| D6RET7   | GRAM domain-containing protein 4 OS=Mus musculus GN=Gramd4 PE=2 SV=1 -                                               | 12.69 | 3 | 2  | 3  | 10  | 0.880 | 1.177 | 1.092 | 1.160 | 24.30   | 12.69 | 5  | 10  | 323  | 37.6  | 8.13  |
| AZASZ8-5 | Isoform 5 of Calcium-binding mitochondrial carrier protein SCaMC-2 OS=Mus musculus GN=Slc25a25 - [SLC25A25_MOUSE]    | 48.50 | 8 | 18 | 21 | 80  | 0.936 | 0.700 | 0.867 | 1.160 | 229.16  | 48.50 | 36 | 80  | 501  | 56.0  | 8.87  |
| Q810B8   | SLIT and NTRK-like protein 4 OS=Mus musculus GN=Slitrk4 PE=2 SV=2 - [SLIK4_MOUSE]                                    | 6.81  | 1 | 3  | 4  | 7   | 0.853 | 0.897 | 1.012 | 1.160 | 19.47   | 6.81  | 6  | 7   | 837  | 94.5  | 7.80  |
| Q5SYH2   | Transmembrane protein 199 OS=Mus musculus GN=Tmem199 PE=2 SV=1 - [TM199_MOUSE]                                       | 7.69  | 1 | 2  | 2  | 3   | 0.805 | 0.957 | 0.855 | 1.160 | 6.77    | 7.69  | 3  | 3   | 208  | 23.1  | 9.10  |



|          |                                                                                                         |       |   |    |    |     |       |       |       |       |        |       |    |     |      |       |      |
|----------|---------------------------------------------------------------------------------------------------------|-------|---|----|----|-----|-------|-------|-------|-------|--------|-------|----|-----|------|-------|------|
| Q148B9   | MAP6 domain-containing protein 1 OS=Mus musculus GN=Map6d1 PE=1 SV=1 -                                  | 56.54 | 1 | 6  | 6  | 33  | 1.636 | 1.051 | 1.617 | 1.160 | 112.37 | 56.54 | 10 | 33  | 191  | 20.4  | 9.88 |
| Q80Y98   | Phospholipase DDHD2 OS=Mus musculus GN=Dhd2 PE=1 SV=3 - [DDHD2_MOUSE]                                   | 22.03 | 3 | 16 | 16 | 58  | 0.785 | 1.040 | 0.989 | 1.160 | 142.61 | 22.03 | 28 | 58  | 699  | 79.5  | 5.31 |
| Q64737   | Trifunctional purine biosynthetic protein adenosine-3 OS=Mus musculus GN=Gart PE=2 SV=3 - [PUR2_MOUSE]  | 45.25 | 3 | 34 | 34 | 108 | 0.944 | 0.982 | 0.998 | 1.160 | 361.35 | 45.25 | 59 | 108 | 1010 | 107.4 | 6.68 |
| Q3UR44   | Protein MRV11 (Fragment) OS=Mus musculus GN=Mrv11 PE=2 SV=1 - [Q3UR44_MOUSE]                            | 5.87  | 4 | 2  | 3  | 5   | 2.433 | 2.455 | 1.136 | 1.160 | 11.16  | 5.87  | 3  | 5   | 715  | 78.4  | 5.66 |
| Q9ER47   | Potassium voltage-gated channel subfamily H member 7 OS=Mus musculus GN=Kcnh7 PE=2 SV=2 - [KCNH7_MOUSE] | 3.10  | 1 | 3  | 3  | 8   | 1.478 | 1.082 | 0.868 | 1.160 | 18.57  | 3.10  | 5  | 8   | 1195 | 135.0 | 8.00 |
| Q99L53   | Phosphoserine phosphatase OS=Mus musculus GN=PspH PE=1 SV=1 - [SERB_MOUSE]                              | 24.89 | 3 | 4  | 4  | 13  | 0.675 | 1.453 | 1.116 | 1.160 | 40.51  | 24.89 | 6  | 13  | 225  | 25.1  | 6.14 |
| P21278   | Guanine nucleotide-binding protein subunit alpha-11 OS=Mus musculus GN=Gna11 PE=1 SV=1 -                | 55.43 | 1 | 13 | 20 | 109 | 0.693 | 1.255 | 0.986 | 1.161 | 310.51 | 55.43 | 36 | 109 | 359  | 42.0  | 5.97 |
| Q8CBY1-4 | Isoform 4 of Protein Smaug homolog 1 OS=Mus musculus GN=Samd4a -                                        | 11.59 | 4 | 2  | 2  | 4   | 0.565 | 0.288 | 0.681 | 1.161 | 8.80   | 11.59 | 3  | 4   | 302  | 32.8  | 9.35 |
| Q9Z2C4   | Myotubularin-related protein 1 OS=Mus musculus GN=Mtmr1 PE=1 SV=1 -                                     | 25.26 | 7 | 13 | 15 | 50  | 0.593 | 1.265 | 1.237 | 1.161 | 129.86 | 25.26 | 26 | 50  | 669  | 75.3  | 6.80 |
| Q9D1A2   | Cytosolic non-specific dipeptidase OS=Mus musculus GN=Cndp2 PE=1 SV=1 -                                 | 60.42 | 1 | 21 | 21 | 103 | 1.016 | 1.178 | 1.098 | 1.161 | 323.42 | 60.42 | 39 | 103 | 475  | 52.7  | 5.66 |
| D3YV3    | Protein Ankrd29 OS=Mus musculus GN=Ankrd29 PE=2 SV=1 - [D3YV3_MOUSE]                                    | 35.60 | 3 | 9  | 9  | 29  | 1.098 | 0.632 | 1.096 | 1.161 | 74.44  | 35.60 | 17 | 29  | 309  | 33.2  | 8.43 |
| Q9WU78   | Programmed cell death 6-interacting protein OS=Mus musculus GN=Pcdc6ip PE=1 SV=3 - [PDC6I_MOUSE]        | 57.08 | 3 | 40 | 40 | 179 | 0.851 | 1.020 | 1.012 | 1.161 | 612.41 | 57.08 | 66 | 179 | 869  | 96.0  | 6.52 |
| Q569Z5   | Probable ATP-dependent RNA helicase DDX46 OS=Mus musculus GN=Ddx46 PE=1 SV=2 - [DDX46_MOUSE]            | 20.54 | 1 | 3  | 21 | 45  | 1.277 | 1.002 | 1.167 | 1.161 | 139.09 | 20.54 | 35 | 45  | 1032 | 117.4 | 9.26 |
| P97355   | Spermine synthase OS=Mus musculus GN=Sms PE=1 SV=1 - [SPSY_MOUSE]                                       | 52.73 | 3 | 15 | 15 | 48  | 0.952 | 1.055 | 1.094 | 1.161 | 125.33 | 52.73 | 27 | 48  | 366  | 41.3  | 5.06 |
| G3UZ30   | Protein phosphatase 1 regulatory subunit 11 (Fragment) OS=Mus musculus GN=Ppp1r11 PE=2 SV=2 -           | 36.67 | 3 | 3  | 3  | 24  | 1.403 | 0.698 | 2.015 | 1.162 | 75.38  | 36.67 | 6  | 24  | 120  | 13.8  | 8.59 |
| Q9Z0J4   | Nitric oxide synthase, brain OS=Mus musculus GN=Nos1 PE=1 SV=1 - [NOS1_MOUSE]                           | 40.80 | 6 | 51 | 53 | 191 | 0.694 | 1.752 | 0.887 | 1.162 | 530.63 | 40.80 | 92 | 191 | 1429 | 160.4 | 7.15 |
| Q99KR8   | Plasma alpha-L-fucosidase OS=Mus musculus GN=Fuca2 PE=2 SV=1 - [FUCO2_MOUSE]                            | 4.12  | 1 | 2  | 2  | 8   | 1.083 | 1.159 | 0.818 | 1.162 | 17.49  | 4.12  | 3  | 8   | 461  | 53.6  | 6.61 |
| P35282   | Ras-related protein Rab-21 OS=Mus musculus GN=Rab21 PE=1 SV=4 - [RAB21_MOUSE]                           | 46.40 | 1 | 9  | 10 | 33  | 0.929 | 0.776 | 0.961 | 1.162 | 105.94 | 46.40 | 17 | 33  | 222  | 24.1  | 7.94 |
| P36993   | Protein phosphatase 1B OS=Mus musculus GN=Ppm1b PE=2 SV=1 - [PPM1B_MOUSE]                               | 43.59 | 5 | 1  | 13 | 91  | 0.861 | 0.856 | 1.610 | 1.162 | 254.22 | 43.59 | 24 | 91  | 390  | 42.8  | 5.19 |
| E9QN14   | SLIT-ROBO Rho GTPase-activating protein 3 OS=Mus musculus GN=Srgap3 PE=2 SV=1 - [E9QN14_MOUSE]          | 38.60 | 3 | 27 | 33 | 158 | 1.015 | 1.109 | 1.161 | 1.162 | 471.83 | 38.60 | 59 | 158 | 1075 | 121.6 | 6.57 |
| E9QB08   | Protein shisa-5 (Fragment) OS=Mus musculus GN=Shisa5 PE=2 SV=1 - [E9QB08_MOUSE]                         | 9.59  | 1 | 1  | 1  | 6   | 1.578 | 1.280 | 1.257 | 1.162 | 0.00   | 9.59  | 1  | 6   | 146  | 15.8  | 7.66 |
| A2AB59   | Rho GTPase-activating protein 27 OS=Mus musculus GN=Arhgap27 PE=1 SV=1 -                                | 5.29  | 3 | 3  | 3  | 11  | 1.047 | 0.708 | 1.102 | 1.162 | 24.56  | 5.29  | 6  | 11  | 869  | 97.0  | 5.94 |
| Q6P6I8   | Signal-regulatory protein alpha OS=Mus musculus GN=Sirpa PE=2 SV=1 - [Q6P6I8_MOUSE]                     | 43.61 | 8 | 14 | 16 | 230 | 0.909 | 1.989 | 1.553 | 1.162 | 664.42 | 43.61 | 28 | 230 | 509  | 56.0  | 8.28 |
| Q9R0N5   | Synaptotagmin-5 OS=Mus musculus GN=Syts5 PE=1 SV=1 - [SYTS_MOUSE]                                       | 34.97 | 1 | 8  | 13 | 69  | 0.766 | 1.510 | 0.889 | 1.162 | 143.72 | 34.97 | 22 | 69  | 386  | 43.1  | 9.60 |
| Q9CZL5   | Pterin-4-alpha-carbinolamine dehydratase 2 OS=Mus musculus GN=Pcbd2 PE=1 SV=2 - [PHS2_MOUSE]            | 34.56 | 1 | 3  | 5  | 11  | 1.183 | 1.264 | 1.967 | 1.162 | 26.82  | 34.56 | 8  | 11  | 136  | 14.8  | 9.16 |

|          |                                                                                                                          |       |    |    |    |     |       |       |       |       |        |       |    |     |      |       |      |
|----------|--------------------------------------------------------------------------------------------------------------------------|-------|----|----|----|-----|-------|-------|-------|-------|--------|-------|----|-----|------|-------|------|
| Q9CQI6   | Coactosin-like protein<br>OS=Mus musculus<br>GN=Cotl1 PE=1 SV=3 -<br>[COTL1_MOUSE]                                       | 66.90 | 1  | 8  | 8  | 65  | 1.060 | 1.090 | 0.899 | 1.162 | 183.26 | 66.90 | 15 | 65  | 142  | 15.9  | 5.40 |
| A2AGR6   | DNA damage-binding<br>protein 2 OS=Mus<br>musculus GN=Ddb2 PE=2<br>SV=1 - [A2AGR6_MOUSE]                                 | 6.42  | 2  | 2  | 2  | 2   | 1.167 | 0.810 | 0.951 | 1.162 | 4.79   | 6.42  | 2  | 2   | 296  | 33.4  | 8.35 |
| Q3UTH8-2 | Isoform 2 of Rho guanine<br>nucleotide exchange factor<br>9 OS=Mus musculus<br>GN=Arhgef9 -<br>[ARHG9_MOUSE]             | 27.07 | 10 | 13 | 15 | 40  | 0.897 | 1.366 | 1.065 | 1.162 | 105.70 | 27.07 | 23 | 40  | 495  | 58.6  | 5.92 |
| Q791T5-2 | Isoform 2 of Mitochondrial<br>carrier homolog 1 OS=Mus<br>musculus GN=Mtch1 -<br>[MTCH1_MOUSE]                           | 44.89 | 3  | 14 | 14 | 72  | 0.808 | 1.048 | 0.938 | 1.162 | 202.58 | 44.89 | 23 | 72  | 372  | 39.9  | 9.48 |
| P23780   | Beta-galactosidase<br>OS=Mus musculus<br>GN=Glb1 PE=2 SV=1 -<br>[BGAL_MOUSE]                                             | 13.91 | 2  | 8  | 8  | 16  | 0.646 | 1.175 | 1.006 | 1.162 | 48.76  | 13.91 | 12 | 16  | 647  | 73.1  | 7.47 |
| Q6NS52-2 | Isoform 2 of Diacylglycerol<br>kinase beta OS=Mus<br>musculus GN=Dgkb -<br>[DGKB_MOUSE]                                  | 33.96 | 2  | 21 | 22 | 67  | 0.817 | 2.232 | 1.735 | 1.162 | 191.98 | 33.96 | 34 | 67  | 795  | 89.4  | 7.93 |
| Q8BW41-2 | Isoform 2 of<br>Glycosyltransferase-like<br>domain-containing protein<br>2 OS=Mus musculus<br>GN=Qtdc2 -<br>[QTD2_MOUSE] | 25.69 | 2  | 9  | 9  | 26  | 0.957 | 1.003 | 0.816 | 1.163 | 82.62  | 25.69 | 17 | 26  | 580  | 66.6  | 8.47 |
| G3X9L6   | MCG55033 OS=Mus<br>musculus GN=Gm10250<br>PE=4 SV=1 -<br>[G3X9L6_MOUSE]                                                  | 88.75 | 3  | 13 | 15 | 170 | 1.052 | 1.061 | 1.337 | 1.163 | 453.80 | 88.75 | 24 | 170 | 160  | 18.6  | 5.44 |
| Q9D404   | 3-oxoacyl-[acyl-carrier-<br>protein] synthase,<br>mitochondrial OS=Mus<br>musculus GN=Oxsm PE=2<br>SV=1 - [OXSM_MOUSE]   | 23.31 | 2  | 6  | 6  | 24  | 1.589 | 1.001 | 0.888 | 1.163 | 70.43  | 23.31 | 11 | 24  | 459  | 48.6  | 7.06 |
| P36898   | Bone morphogenetic<br>protein receptor type-1B<br>OS=Mus musculus<br>GN=Bmpr1b PE=1 SV=1 -<br>[BMR1B_MOUSE]              | 8.57  | 1  | 2  | 3  | 3   | 1.943 | 1.274 | 1.570 | 1.163 | 5.92   | 8.57  | 3  | 3   | 502  | 56.9  | 7.53 |
| Q8K3I9   | Glucocorticoid-induced<br>transcript 1 protein<br>OS=Mus musculus<br>GN=Glc1 PE=1 SV=1 -<br>[GLC1_MOUSE]                 | 16.01 | 5  | 5  | 5  | 8   | 1.137 | 0.823 | 1.930 | 1.163 | 18.88  | 16.01 | 8  | 8   | 537  | 57.4  | 9.47 |
| P97313   | DNA-dependent protein<br>kinase catalytic subunit<br>OS=Mus musculus<br>GN=Pfkfb PE=1 SV=3 -<br>[PRKDC_MOUSE]            | 2.18  | 3  | 5  | 7  | 14  | 0.812 | 0.934 | 0.901 | 1.163 | 28.98  | 2.18  | 8  | 14  | 4128 | 471.2 | 7.12 |
| Q80U44   | Zinc finger FYVE domain-<br>containing protein 16<br>OS=Mus musculus<br>GN=Zfyve16 PE=1 SV=2 -<br>[ZFY16_MOUSE]          | 1.83  | 1  | 3  | 3  | 4   | 1.325 | 1.311 | 1.176 | 1.163 | 8.53   | 1.83  | 4  | 4   | 1528 | 166.6 | 4.78 |
| Q6ZPJO   | Testis-expressed sequence<br>2 protein OS=Mus<br>musculus GN=Tex2 PE=1<br>SV=2 - [TEX2_MOUSE]                            | 24.65 | 3  | 21 | 21 | 49  | 0.847 | 0.910 | 1.116 | 1.163 | 134.87 | 24.65 | 33 | 49  | 1128 | 125.1 | 5.80 |
| Q3UJU9   | Regulator of microtubule<br>dynamics protein 3<br>OS=Mus musculus<br>GN=Rmd3 PE=1 SV=2 -<br>[RMD3_MOUSE]                 | 35.74 | 4  | 12 | 12 | 73  | 0.895 | 1.356 | 1.025 | 1.163 | 202.02 | 35.74 | 22 | 73  | 470  | 52.0  | 5.21 |
| P70271   | PDZ and LIM domain<br>protein 4 OS=Mus<br>musculus GN=Pdlim4<br>PE=1 SV=3 -                                              | 36.67 | 3  | 8  | 8  | 28  | 1.353 | 1.268 | 1.131 | 1.164 | 58.32  | 36.67 | 14 | 28  | 330  | 35.5  | 8.05 |
| D3Z2R5   | Protein Sepn1 OS=Mus<br>musculus GN=Sepn1 PE=4<br>SV=1 - [D3Z2R5_MOUSE]                                                  | 5.75  | 1  | 3  | 3  | 5   | 1.568 | 1.104 | 0.637 | 1.164 | 16.29  | 5.75  | 5  | 5   | 557  | 62.4  | 5.55 |
| Q99NH8   | Triggering receptor<br>expressed on myeloid cells<br>2 OS=Mus musculus<br>GN=Trem2 PE=1 SV=1 -<br>[TREM2_MOUSE]          | 12.78 | 2  | 2  | 2  | 2   | 1.606 | 1.251 | 1.307 | 1.164 | 5.53   | 12.78 | 2  | 2   | 227  | 24.5  | 6.67 |
| Q9DC70   | NADH dehydrogenase<br>[ubiquinone] iron-sulfur<br>protein 7, mitochondrial<br>OS=Mus musculus<br>GN=Ndufs7 PE=1 SV=1 -   | 14.73 | 1  | 4  | 4  | 24  | 0.555 | 0.804 | 0.985 | 1.164 | 67.36  | 14.73 | 7  | 24  | 224  | 24.7  | 9.92 |
| Q920N2   | Biotin-protein ligase<br>OS=Mus musculus<br>GN=Hkcs PE=1 SV=1 -<br>[BPLL_MOUSE]                                          | 15.65 | 1  | 6  | 6  | 15  | 1.708 | 1.025 | 1.251 | 1.164 | 34.27  | 15.65 | 11 | 15  | 722  | 78.5  | 5.34 |
| Q91WD5   | NADH dehydrogenase<br>[ubiquinone] iron-sulfur<br>protein 2, mitochondrial<br>OS=Mus musculus<br>GN=Ndufs2 PE=1 SV=1 -   | 61.99 | 3  | 22 | 22 | 241 | 0.747 | 1.114 | 1.046 | 1.164 | 749.89 | 61.99 | 41 | 241 | 463  | 52.6  | 6.99 |
| Q8BGR9   | Ubiquitin-like domain-<br>containing CTD<br>phosphatase 1 OS=Mus<br>musculus GN=Ublcp1<br>PE=1 SV=1 -                    | 27.36 | 2  | 8  | 8  | 25  | 0.971 | 0.548 | 0.799 | 1.164 | 63.93  | 27.36 | 13 | 25  | 318  | 36.8  | 6.46 |
| Q8C143   | Myosin light chain 6B<br>OS=Mus musculus<br>GN=My6b PE=2 SV=1 -<br>[MYL6B_MOUSE]                                         | 56.04 | 1  | 10 | 12 | 63  | 1.900 | 0.702 | 1.398 | 1.165 | 172.64 | 56.04 | 19 | 63  | 207  | 22.7  | 5.53 |
| Q9ER74   | Sal-like protein 1 OS=Mus<br>musculus GN=Sall1 PE=1<br>SV=1 - [SALL1_MOUSE]                                              | 3.86  | 2  | 2  | 2  | 4   | 0.593 | 0.825 | 0.855 | 1.165 | 10.38  | 3.86  | 2  | 4   | 1322 | 140.1 | 7.08 |

|          |                                                                                                                                 |       |   |    |    |      |       |       |       |       |         |       |    |      |      |       |      |
|----------|---------------------------------------------------------------------------------------------------------------------------------|-------|---|----|----|------|-------|-------|-------|-------|---------|-------|----|------|------|-------|------|
| Q9D2E2   | Target of EGR1 protein 1<br>OS=Mus musculus<br>GN=Toe1 PE=2 SV=1 -<br>[TOE1_MOUSE]                                              | 3.52  | 2 | 2  | 2  | 5    | 1.525 | 1.394 | 1.202 | 1.165 | 5.86    | 3.52  | 3  | 5    | 511  | 56.8  | 6.64 |
| Q80ZD8   | Amphoterin-induced<br>protein 1 OS=Mus<br>musculus GN=Amigo1<br>PE=1 SV=1 -                                                     | 15.45 | 3 | 6  | 6  | 8    | 0.774 | 1.312 | 1.068 | 1.165 | 27.35   | 15.45 | 8  | 8    | 492  | 55.3  | 6.86 |
| E9QMR2   | Dedicator of cytokinesis<br>protein 9 OS=Mus<br>musculus GN=Dock9 PE=2<br>SV=1 - [E9QMR2_MOUSE]                                 | 20.36 | 2 | 1  | 37 | 98   | 0.848 | 1.055 | 1.007 | 1.165 | 257.11  | 20.36 | 60 | 98   | 2058 | 234.8 | 7.56 |
| D3YZ99   | Protein N-terminal<br>asparagine<br>amidohydrolase OS=Mus<br>musculus GN=Ntan1 PE=2<br>SV=1 - [D3YZ99_MOUSE]                    | 7.93  | 2 | 1  | 1  | 3    | 1.673 | 0.750 | 1.060 | 1.165 | 17.11   | 7.93  | 2  | 3    | 227  | 24.9  | 5.88 |
| Q4VA93   | Protein kinase C OS=Mus<br>musculus GN=Prkca PE=2<br>SV=1 - [Q4VA93_MOUSE]                                                      | 38.54 | 2 | 4  | 23 | 130  | 0.732 | 1.944 | 1.597 | 1.165 | 330.59  | 38.54 | 37 | 130  | 672  | 76.8  | 7.05 |
| Q91XP5   | Glycine receptor subunit<br>alpha-3 OS=Mus musculus<br>GN=GlaR3 PE=2 SV=2 -<br>[GLRA3_MOUSE]                                    | 8.19  | 2 | 4  | 4  | 9    | 0.759 | 0.883 | 0.954 | 1.166 | 28.19   | 8.19  | 5  | 9    | 464  | 53.7  | 8.50 |
| Q9Z2D6   | Methyl-CpG-binding<br>protein 2 OS=Mus<br>musculus GN=Mecp2<br>PE=1 SV=1 -                                                      | 50.21 | 4 | 19 | 19 | 122  | 0.744 | 1.187 | 1.204 | 1.166 | 369.74  | 50.21 | 36 | 122  | 484  | 52.3  | 9.96 |
| O35621   | Phosphomannomutase 1<br>OS=Mus musculus<br>GN=Pmm1 PE=1 SV=1 -<br>[PMM1_MOUSE]                                                  | 51.15 | 5 | 11 | 13 | 68   | 1.188 | 1.470 | 1.235 | 1.166 | 177.47  | 51.15 | 22 | 68   | 262  | 29.8  | 5.47 |
| P70178   | Homeobox protein SIX5<br>OS=Mus musculus<br>GN=Six5 PE=1 SV=2 -<br>[SIX5_MOUSE]                                                 | 6.54  | 1 | 2  | 2  | 2    | 2.113 | 0.584 | 0.876 | 1.166 | 4.44    | 6.54  | 2  | 2    | 719  | 73.7  | 5.14 |
| O70146   | Dual specificity testis-<br>specific protein kinase 1<br>OS=Mus musculus<br>GN=Tek1 PE=2 SV=3 -<br>[TESK1_MOUSE]                | 1.91  | 1 | 1  | 1  | 2    | 0.598 | 1.152 | 0.991 | 1.166 | 4.43    | 1.91  | 1  | 2    | 627  | 68.0  | 8.06 |
| E9QKU6   | Serine/threonine-protein<br>phosphatase 4 regulatory<br>subunit 4 OS=Mus<br>musculus GN=Ppp4r4<br>PE=4 SV=1 -<br>[PPP4R4_MOUSE] | 21.83 | 4 | 16 | 16 | 46   | 0.737 | 0.954 | 1.151 | 1.166 | 114.85  | 21.83 | 27 | 46   | 875  | 99.4  | 7.71 |
| Q8C8T8   | Pre-rRNA-processing<br>protein TSR2 homolog<br>OS=Mus musculus<br>GN=Trs2 PE=2 SV=1 -<br>[TSR2_MOUSE]                           | 13.61 | 2 | 2  | 2  | 26   | 1.543 | 1.431 | 1.349 | 1.166 | 81.51   | 13.61 | 4  | 26   | 191  | 20.9  | 4.23 |
| P16054   | Protein kinase C epsilon<br>type OS=Mus musculus<br>GN=Prkce PE=1 SV=1 -<br>[KPCE_MOUSE]                                        | 51.70 | 3 | 32 | 34 | 212  | 0.663 | 1.605 | 1.552 | 1.166 | 581.66  | 51.70 | 58 | 212  | 737  | 83.5  | 7.03 |
| A2AWI7   | Endophilin-B2 OS=Mus<br>musculus GN=Sh3glb2<br>PE=2 SV=1 -<br>[A2AWI7_MOUSE]                                                    | 53.47 | 1 | 1  | 19 | 125  | 0.841 | 1.197 | 1.329 | 1.166 | 373.90  | 53.47 | 35 | 125  | 404  | 44.9  | 5.58 |
| P67778   | Prohibitin OS=Mus<br>musculus GN=Pfb PE=1<br>SV=1 - [PHB_MOUSE]                                                                 | 53.31 | 2 | 14 | 14 | 110  | 0.749 | 1.112 | 1.035 | 1.166 | 410.01  | 53.31 | 27 | 110  | 272  | 29.8  | 5.76 |
| E9Q6Y0   | Transmembrane channel-<br>like protein 3 OS=Mus<br>musculus GN=Tmc3 PE=2<br>SV=1 - [E9Q6Y0_MOUSE]                               | 1.18  | 3 | 1  | 1  | 1    | 2.675 | 4.078 | 1.062 | 1.166 | 2.48    | 1.18  | 1  | 1    | 1101 | 125.6 | 9.11 |
| Q62240   | Lysine-specific<br>demethylase 5D OS=Mus<br>musculus GN=Kdm5d<br>PE=2 SV=2 -                                                    | 1.94  | 4 | 2  | 4  | 5    | 1.302 | 0.999 | 1.345 | 1.166 | 5.81    | 1.94  | 4  | 5    | 1548 | 176.9 | 6.16 |
| B7ZCJ1   | Rho GTPase-activating<br>protein 21 OS=Mus<br>musculus GN=Arhgap21<br>PE=4 SV=1 -                                               | 28.08 | 6 | 42 | 43 | 121  | 1.009 | 1.184 | 1.414 | 1.166 | 352.94  | 28.08 | 71 | 121  | 1955 | 216.8 | 7.64 |
| Q99K10   | Aconitate hydratase,<br>mitochondrial OS=Mus<br>musculus GN=Aco2 PE=1<br>SV=1 - [ACON_MOUSE]                                    | 58.33 | 1 | 47 | 47 | 1028 | 0.926 | 0.854 | 1.113 | 1.167 | 2947.45 | 58.33 | 86 | 1028 | 780  | 85.4  | 7.93 |
| Q65536-2 | Isoform 2 of Krev<br>interaction trapped protein<br>1 OS=Mus musculus<br>GN=Krt1 -<br>[KRIT1_MOUSE]                             | 7.03  | 4 | 4  | 4  | 9    | 1.329 | 1.014 | 1.427 | 1.167 | 20.07   | 7.03  | 7  | 9    | 697  | 79.5  | 8.41 |
| Q80VM5   | Dipeptidyl aminopeptidase-<br>like protein 6 OS=Mus<br>musculus GN=Dpp6 PE=2<br>SV=1 - [Q80VM5_MOUSE]                           | 33.25 | 3 | 1  | 25 | 174  | 1.479 | 1.087 | 2.022 | 1.167 | 480.88  | 33.25 | 49 | 174  | 803  | 91.2  | 6.48 |
| Q8CC86   | Nicotinate<br>phosphoribosyltransferase<br>OS=Mus musculus<br>GN=Naprt1 PE=2 SV=1 -<br>[PNCB_MOUSE]                             | 22.86 | 1 | 9  | 9  | 25   | 1.221 | 1.172 | 0.892 | 1.167 | 80.52   | 22.86 | 16 | 25   | 538  | 58.2  | 6.46 |
| Q62108-3 | Isoform 3 of Disks large<br>homolog 4 OS=Mus<br>musculus GN=Dlg4 -<br>[DLG4_MOUSE]                                              | 48.27 | 9 | 25 | 31 | 252  | 0.844 | 1.633 | 1.447 | 1.167 | 830.65  | 48.27 | 58 | 252  | 721  | 80.1  | 5.92 |
| Q8K3F6   | Potassium voltage-gated<br>channel subfamily KQT<br>member 3 OS=Mus<br>musculus GN=Kcna3 PE=1<br>SV=2 - [KCNQ3_MOUSE]           | 13.40 | 1 | 6  | 7  | 15   | 0.711 | 1.139 | 1.595 | 1.167 | 48.68   | 13.40 | 11 | 15   | 873  | 96.8  | 8.79 |
| F6SMJ7   | GTP-binding protein 8<br>(Fragment) OS=Mus<br>musculus GN=Gtbbp8<br>PE=4 SV=1 -                                                 | 27.89 | 4 | 3  | 3  | 10   | 0.870 | 0.840 | 1.041 | 1.168 | 33.34   | 27.89 | 6  | 10   | 147  | 16.3  | 8.85 |

|          |                                                                                                                                   |       |    |    |     |     |       |       |       |       |         |       |     |     |      |       |      |
|----------|-----------------------------------------------------------------------------------------------------------------------------------|-------|----|----|-----|-----|-------|-------|-------|-------|---------|-------|-----|-----|------|-------|------|
| A2AT37   | Protein Upf2 OS=Mus musculus GN=Upf2 PE=2 SV=1 - [A2AT37_MOUSE]                                                                   | 11.74 | 2  | 11 | 11  | 25  | 1.301 | 1.125 | 1.026 | 1.168 | 73.83   | 11.74 | 19  | 25  | 1269 | 147.5 | 5.64 |
| O35633-2 | Isoform 2 of Vesicular inhibitory amino acid transporter OS=Mus musculus GN=Slc32a1 - [VIAAT_MOUSE]                               | 30.52 | 2  | 13 | 14  | 96  | 0.573 | 0.631 | 0.956 | 1.168 | 257.70  | 30.52 | 26  | 96  | 521  | 56.8  | 6.90 |
| Q91V57   | N-chimaerin OS=Mus musculus GN=Chn1 PE=1 SV=2 - [CHIN_MOUSE]                                                                      | 28.54 | 8  | 12 | 12  | 36  | 0.895 | 0.819 | 1.021 | 1.168 | 116.75  | 28.54 | 18  | 36  | 459  | 53.2  | 6.76 |
| O08530   | Sphingosine 1-phosphate receptor 1 OS=Mus musculus GN=S1pr1 PE=2 SV=3 - [S1PR1_MOUSE]                                             | 8.38  | 1  | 3  | 3   | 12  | 0.492 | 0.981 | 1.117 | 1.168 | 37.91   | 8.38  | 6   | 12  | 382  | 42.6  | 9.42 |
| Q77Q33   | RGM domain family member B OS=Mus musculus GN=Rgmb PE=1 SV=1 - [RGM_B_MOUSE]                                                      | 6.19  | 1  | 2  | 2   | 2   | 1.389 | 1.011 | 1.424 | 1.168 | 7.28    | 6.19  | 2   | 2   | 436  | 47.2  | 6.34 |
| Q99LC5   | Electron transfer flavoprotein subunit alpha, mitochondrial OS=Mus musculus GN=EtfA PE=1 SV=2 - [ETFA_MOUSE]                      | 73.87 | 1  | 20 | 20  | 88  | 1.160 | 1.061 | 0.994 | 1.168 | 305.15  | 73.87 | 36  | 88  | 333  | 35.0  | 8.38 |
| P12657   | Muscarinic acetylcholine receptor M1 OS=Mus musculus GN=Chrm1 PE=2 SV=2 -                                                         | 5.65  | 1  | 2  | 2   | 8   | 0.596 | 2.753 | 2.864 | 1.168 | 17.43   | 5.65  | 4   | 8   | 460  | 51.3  | 9.32 |
| B2RUS7   | ATP-binding cassette, sub-family C (CFTR/MRP), member 8 OS=Mus musculus GN=Abcc8 PE=2 SV=1 - [B2RUS7_MOUSE]                       | 8.56  | 5  | 9  | 11  | 17  | 0.869 | 1.011 | 0.974 | 1.168 | 31.81   | 8.56  | 14  | 17  | 1588 | 178.0 | 8.19 |
| P56379   | 6.8 kDa mitochondrial proteolipid OS=Mus musculus GN=Mp68 PE=2 SV=1 - [68MP_MOUSE]                                                | 29.31 | 1  | 2  | 2   | 15  | 0.945 | 1.012 | 1.284 | 1.169 | 32.20   | 29.31 | 3   | 15  | 58   | 6.7   | 9.99 |
| Q91XY8   | Protein Pcdhgb6 OS=Mus musculus GN=Pcdhga11 PE=2 SV=1 - [Q91XY8_MOUSE]                                                            | 10.40 | 1  | 3  | 8   | 30  | 1.370 | 1.568 | 1.558 | 1.169 | 83.09   | 10.40 | 16  | 30  | 933  | 101.1 | 4.88 |
| Q8B260   | Stonin-2 OS=Mus musculus GN=Ston2 PE=2 SV=1 - [STON2_MOUSE]                                                                       | 16.54 | 2  | 11 | 11  | 25  | 1.056 | 1.129 | 1.025 | 1.169 | 73.44   | 16.54 | 17  | 25  | 895  | 99.5  | 5.26 |
| D9HP81   | Regulating synaptic membrane exocytosis 2 OS=Mus musculus GN=Rims2 PE=2 SV=1 - [D9HP81_MOUSE]                                     | 18.51 | 4  | 21 | 24  | 73  | 0.946 | 0.888 | 1.283 | 1.169 | 209.33  | 18.51 | 40  | 73  | 1572 | 177.5 | 9.36 |
| P04104   | Keratin, type II cytoskeletal 1 OS=Mus musculus GN=Krt1 PE=1 SV=4 - [K2C1_MOUSE]                                                  | 4.87  | 1  | 2  | 3   | 16  | 2.738 | 1.212 | 1.178 | 1.169 | 35.67   | 4.87  | 5   | 16  | 637  | 65.6  | 8.15 |
| H3B1W6   | 1-phosphatidylinositol 4,5-bisphosphate phosphodiesterase eta-2 OS=Mus musculus GN=Plch2 PE=2 SV=1 - [P3B1W6_MOUSE]               | 19.70 | 15 | 17 | 21  | 79  | 0.505 | 1.223 | 1.309 | 1.169 | 222.52  | 19.70 | 36  | 79  | 1137 | 125.7 | 6.79 |
| Q9WVG6-2 | Isoform 2 of Histone-arginine methyltransferase CARM1 OS=Mus musculus GN=Carm1 - [CARM1_MOUSE]                                    | 17.44 | 4  | 7  | 7   | 18  | 0.952 | 1.113 | 1.063 | 1.169 | 47.34   | 17.44 | 12  | 18  | 585  | 63.4  | 6.61 |
| Q8BGQ1   | Spermatogenesis-defective protein 39 homolog OS=Mus musculus GN=Vipas39 PE=1 SV=1 - [SPE39_MOUSE]                                 | 33.81 | 2  | 15 | 15  | 55  | 0.992 | 1.156 | 1.001 | 1.169 | 169.08  | 33.81 | 26  | 55  | 491  | 56.6  | 7.17 |
| Q3UGX2   | Spectrin beta 1 OS=Mus musculus GN=Sptb PE=2 SV=1 - [Q3UGX2_MOUSE]                                                                | 54.27 | 1  | 7  | 109 | 433 | 0.901 | 1.149 | 1.112 | 1.169 | 1366.96 | 54.27 | 193 | 433 | 2329 | 267.9 | 5.49 |
| D3YY34   | Polyhomeotic-like protein 3 OS=Mus musculus GN=Ptc3 PE=4 SV=1 - [D3YY34_MOUSE]                                                    | 7.28  | 7  | 4  | 4   | 13  | 1.989 | 1.757 | 1.610 | 1.169 | 27.37   | 7.28  | 6   | 13  | 948  | 102.1 | 6.65 |
| Q6ZQ38   | Cullin-associated NEDD8-dissociated protein 1 OS=Mus musculus GN=Cand1 PE=2 SV=2 - [CAND1_MOUSE]                                  | 38.05 | 2  | 42 | 44  | 231 | 0.637 | 1.225 | 0.956 | 1.170 | 753.86  | 38.05 | 79  | 231 | 1230 | 136.2 | 5.78 |
| P97454   | Mothers against decapentaplegic homolog 5 OS=Mus musculus GN=Smad5 PE=1 SV=2 - [SMAD5_MOUSE]                                      | 7.31  | 4  | 2  | 4   | 7   | 0.739 | 0.968 | 0.889 | 1.170 | 21.71   | 7.31  | 7   | 7   | 465  | 52.1  | 7.71 |
| Q9QZH6   | Evolutionarily conserved signaling intermediate in Toll pathway, mitochondrial OS=Mus musculus GN=Ecsit PE=1 SV=2 - [ECSIT_MOUSE] | 32.64 | 2  | 12 | 12  | 26  | 0.828 | 0.879 | 0.987 | 1.170 | 66.71   | 32.64 | 21  | 26  | 435  | 49.8  | 6.60 |
| Q8K0L4   | Heat shock 70 kDa protein 12A OS=Mus musculus GN=Hspa12a PE=1 SV=1 - [H512A_MOUSE]                                                | 62.37 | 1  | 34 | 37  | 259 | 0.935 | 0.976 | 1.094 | 1.170 | 734.25  | 62.37 | 66  | 259 | 675  | 74.8  | 6.77 |
| Q3T1U4   | 2',5'-phosphodiesterase 12 OS=Mus musculus GN=Pde12 PE=2 SV=2 - [PDE12_MOUSE]                                                     | 22.70 | 1  | 9  | 9   | 26  | 0.954 | 0.887 | 1.024 | 1.170 | 70.09   | 22.70 | 16  | 26  | 608  | 67.5  | 6.92 |
| Q9Z0X1   | Apoptosis-inducing factor 1, mitochondrial OS=Mus musculus GN=Aifm1 PE=1 SV=1 - [AIFM1_MOUSE]                                     | 33.82 | 2  | 17 | 17  | 94  | 1.020 | 1.018 | 1.090 | 1.170 | 286.59  | 33.82 | 32  | 94  | 612  | 66.7  | 9.17 |

|          |                                                                                                                                    |       |    |    |    |     |       |       |       |       |        |       |    |     |      |       |      |
|----------|------------------------------------------------------------------------------------------------------------------------------------|-------|----|----|----|-----|-------|-------|-------|-------|--------|-------|----|-----|------|-------|------|
| Q60759   | Glutaryl-CoA dehydrogenase, mitochondrial OS=Mus musculus GN=Gcdh PE=2 SV=2 - [GCDH_MOUSE]                                         | 29.91 | 2  | 8  | 11 | 52  | 0.586 | 0.989 | 0.942 | 1.170 | 124.56 | 29.91 | 16 | 52  | 438  | 48.6  | 8.73 |
| Q6ZPK0-5 | Isoform 5 of PHD finger protein 21A OS=Mus musculus GN=Pfh21a - [PF21A_MOUSE]                                                      | 5.31  | 18 | 3  | 3  | 4   | 0.713 | 0.551 | 1.168 | 1.170 | 8.86   | 5.31  | 4  | 4   | 527  | 59.1  | 9.54 |
| Q8VDG5   | Phosphopantothenate--cysteine ligase OS=Mus musculus GN=Ppcc PE=2 SV=1 - [PPCS_MOUSE]                                              | 23.15 | 2  | 7  | 7  | 12  | 1.316 | 0.998 | 0.967 | 1.170 | 26.44  | 23.15 | 8  | 12  | 311  | 33.8  | 6.55 |
| P60041   | Somatostatin OS=Mus musculus GN=Sst PE=2 SV=1 - [SMS_MOUSE]                                                                        | 44.83 | 1  | 3  | 3  | 15  | 1.273 | 1.506 | 1.278 | 1.170 | 31.46  | 44.83 | 5  | 15  | 116  | 12.7  | 5.52 |
| Q3V209-2 | Isoform 2 of Transmembrane and ubiquitin-like domain-containing protein 2 OS=Mus musculus                                          | 10.37 | 3  | 1  | 1  | 5   | 0.707 | 0.560 | 0.858 | 1.170 | 17.70  | 10.37 | 2  | 5   | 299  | 31.6  | 4.92 |
| Q60996   | Serine/threonine-protein phosphatase 2A 56 kDa regulatory subunit gamma isoform OS=Mus musculus GN=Ppp25c PE=1 SV=2 - [2A5G_MOUSE] | 33.78 | 4  | 8  | 15 | 35  | 0.586 | 1.031 | 1.049 | 1.170 | 119.38 | 33.78 | 24 | 35  | 524  | 60.8  | 6.64 |
| Q8BMK1   | Methyltransferase-like protein 2 OS=Mus musculus GN=Mettl2 PE=2 SV=2 - [METL2_MOUSE]                                               | 7.46  | 1  | 2  | 2  | 4   | 1.447 | 1.200 | 1.281 | 1.170 | 6.64   | 7.46  | 4  | 4   | 389  | 43.9  | 6.20 |
| Q5SQM0   | Echinoderm microtubule-associated protein-like 6 OS=Mus musculus GN=Emi6 PE=2 SV=1 - [EMAL6_MOUSE]                                 | 3.27  | 1  | 4  | 6  | 9   | 1.275 | 1.411 | 1.135 | 1.170 | 19.18  | 3.27  | 9  | 9   | 1958 | 217.8 | 7.42 |
| O35071   | Kinesin-like protein KIF1C OS=Mus musculus GN=Kif1c PE=1 SV=2 - [KIF1C_MOUSE]                                                      | 12.09 | 3  | 5  | 13 | 51  | 1.075 | 0.610 | 1.414 | 1.170 | 116.75 | 12.09 | 20 | 51  | 1100 | 122.4 | 7.03 |
| Q3UPC7   | Uncharacterized protein KIAA0825 homolog OS=Mus musculus PE=2 SV=3 - [K0825_MOUSE]                                                 | 0.86  | 1  | 1  | 1  | 1   | 0.815 | 0.798 | 1.085 | 1.170 | 0.00   | 0.86  | 1  | 1   | 1272 | 145.5 | 6.23 |
| Q99LY2   | Glycerophosphodiester phosphodiesterase domain-containing protein 3 OS=Mus musculus GN=Gdpd3 PE=2 SV=2 - [GDPD3_MOUSE]             | 3.03  | 1  | 1  | 1  | 1   | 0.433 | 0.989 | 1.139 | 1.170 | 0.00   | 3.03  | 1  | 1   | 330  | 38.5  | 7.25 |
| Q9D820-2 | Isoform 2 of Prolyl-HRNA synthetase associated domain-containing protein 1 OS=Mus musculus GN=Prorsd1 - [PRORS1_MOUSE]             | 26.67 | 2  | 3  | 3  | 6   | 1.374 | 0.831 | 0.996 | 1.170 | 15.66  | 26.67 | 4  | 6   | 135  | 15.0  | 7.18 |
| P28843   | Dipeptidyl peptidase 4 OS=Mus musculus GN=Dpp4 PE=1 SV=3 - [DPP4_MOUSE]                                                            | 6.97  | 1  | 3  | 4  | 10  | 0.828 | 4.083 | 0.948 | 1.170 | 16.80  | 6.97  | 6  | 10  | 760  | 87.4  | 6.42 |
| Q8C1D8   | Protein IWS1 homolog OS=Mus musculus GN=Iws1 PE=1 SV=1 - [IWS1_MOUSE]                                                              | 8.49  | 2  | 6  | 6  | 8   | 1.195 | 1.018 | 1.139 | 1.170 | 18.20  | 8.49  | 8  | 8   | 766  | 85.2  | 4.67 |
| O08852   | Polycystin-1 OS=Mus musculus GN=Pkd1 PE=1 SV=2 - [PKD1_MOUSE]                                                                      | 0.82  | 1  | 2  | 3  | 4   | 1.078 | 0.938 | 1.221 | 1.171 | 9.18   | 0.82  | 4  | 4   | 4293 | 466.3 | 5.87 |
| P32921-2 | Isoform 2 of Tryptophan--tRNA ligase, cytoplasmic OS=Mus musculus GN=Wars - [SYWC_MOUSE]                                           | 50.53 | 1  | 1  | 22 | 184 | 1.001 | 1.019 | 1.159 | 1.171 | 522.95 | 50.53 | 38 | 184 | 475  | 53.6  | 7.08 |
| Q9JHI7   | Exosome complex component RRP45 OS=Mus musculus GN=Exosc9 PE=2 SV=1 - [EXOS9_MOUSE]                                                | 4.79  | 1  | 2  | 2  | 3   | 1.049 | 0.795 | 0.919 | 1.171 | 3.25   | 4.79  | 3  | 3   | 438  | 48.9  | 5.11 |
| Q499X9   | Methionine--tRNA ligase, mitochondrial OS=Mus musculus GN=Mars2 PE=2 SV=2 - [SYMM_MOUSE]                                           | 13.48 | 1  | 8  | 8  | 17  | 0.810 | 0.856 | 1.060 | 1.171 | 51.28  | 13.48 | 15 | 17  | 586  | 65.8  | 8.09 |
| Q9CZ57   | 5-methylcytosine rRNA methyltransferase NSUN4 OS=Mus musculus GN=Nsun4 PE=2 SV=1 - [NSUN4_MOUSE]                                   | 14.17 | 2  | 4  | 4  | 6   | 0.706 | 1.117 | 1.003 | 1.171 | 18.47  | 14.17 | 6  | 6   | 381  | 42.8  | 8.25 |
| Q8K358   | Phosphatidylinositol glycan anchor biosynthesis class U protein OS=Mus musculus GN=Pigu PE=2 SV=4 - [PIGU_MOUSE]                   | 3.92  | 2  | 1  | 1  | 2   | 0.663 | 0.975 | 0.945 | 1.171 | 8.47   | 3.92  | 2  | 2   | 434  | 49.8  | 7.72 |
| P42703   | Leukemia inhibitory factor receptor OS=Mus musculus GN=Lifr PE=1 SV=1 - [LIFR_MOUSE]                                               | 13.83 | 1  | 3  | 13 | 28  | 1.644 | 0.911 | 1.131 | 1.171 | 83.68  | 13.83 | 20 | 28  | 1092 | 122.5 | 6.04 |
| A2AQP0   | Myosin-7B OS=Mus musculus GN=Myh7b PE=3 SV=1 - [MYH7B_MOUSE]                                                                       | 3.76  | 1  | 4  | 8  | 23  | 1.784 | 0.877 | 1.348 | 1.171 | 51.16  | 3.76  | 11 | 23  | 1941 | 221.4 | 5.88 |
| B1AWL4   | Protein Zfp462 OS=Mus musculus GN=Zfp462 PE=2 SV=1 - [B1AWL4_MOUSE]                                                                | 1.49  | 3  | 2  | 2  | 2   | 0.855 | 0.782 | 0.835 | 1.171 | 3.31   | 1.49  | 2  | 2   | 1407 | 160.6 | 7.69 |
| E9PWK1   | Epoxide hydrolase 1 OS=Mus musculus GN=Ephx1 PE=2 SV=1 - [E9PWK1_MOUSE]                                                            | 29.93 | 4  | 13 | 13 | 48  | 0.907 | 1.953 | 1.070 | 1.171 | 143.79 | 29.93 | 24 | 48  | 441  | 50.9  | 8.15 |

|          |                                                                                                                                                  |       |   |    |    |     |       |       |       |       |        |       |    |     |      |       |       |
|----------|--------------------------------------------------------------------------------------------------------------------------------------------------|-------|---|----|----|-----|-------|-------|-------|-------|--------|-------|----|-----|------|-------|-------|
| Q8BVG8   | N-acetyltransferase 14<br>OS=Mus musculus<br>GN=Nat14 PE=2 SV=1 -<br>[NAT14_MOUSE]                                                               | 14.56 | 1 | 3  | 3  | 6   | 0.468 | 1.707 | 1.301 | 1.171 | 11.96  | 14.56 | 5  | 6   | 206  | 21.8  | 10.74 |
| A2A716   | Protein Osbp17 OS=Mus<br>musculus GN=Osbp17<br>PE=2 SV=1 -<br>[A2A716_MOUSE]                                                                     | 14.02 | 2 | 10 | 12 | 41  | 1.125 | 0.855 | 1.152 | 1.171 | 109.20 | 14.02 | 20 | 41  | 963  | 108.1 | 7.69  |
| P60487   | Pyridoxal phosphate<br>phosphatase OS=Mus<br>musculus GN=Pdxp PE=1<br>SV=1 - [PLPP_MOUSE]                                                        | 75.68 | 1 | 18 | 18 | 125 | 1.542 | 1.466 | 1.052 | 1.171 | 365.02 | 75.68 | 33 | 125 | 292  | 31.5  | 5.74  |
| E9Q111   | Protein Gm3893 OS=Mus<br>musculus GN=Gm3893<br>PE=4 SV=1 -<br>[E9Q111_MOUSE]                                                                     | 3.64  | 3 | 1  | 1  | 1   | 0.872 | 0.332 | 0.745 | 1.171 | 0.00   | 3.64  | 1  | 1   | 302  | 33.2  | 5.57  |
| Q6PHN9   | Ras-related protein Rab-35<br>OS=Mus musculus<br>GN=Rab35 PE=1 SV=1 -<br>[RAB35_MOUSE]                                                           | 78.61 | 1 | 11 | 16 | 118 | 0.708 | 0.993 | 0.972 | 1.172 | 356.20 | 78.61 | 26 | 118 | 201  | 23.0  | 8.29  |
| E9Q368   | Protein Gm17296 OS=Mus<br>musculus GN=Gm17296<br>PE=4 SV=1 -<br>[E9Q368_MOUSE]                                                                   | 0.82  | 1 | 1  | 1  | 2   | 1.165 | 5.336 | 1.079 | 1.172 | 0.00   | 0.82  | 1  | 2   | 1579 | 175.6 | 6.62  |
| Q9EPC1   | Alpha-parvin OS=Mus<br>musculus GN=Parva PE=1<br>SV=1 - [PARVA_MOUSE]                                                                            | 24.73 | 4 | 6  | 9  | 29  | 0.930 | 1.598 | 0.931 | 1.172 | 75.97  | 24.73 | 16 | 29  | 372  | 42.3  | 5.95  |
| Q9D6K7   | Tetratricopeptide repeat<br>protein 33 OS=Mus<br>musculus GN=Ttc33 PE=2<br>SV=1 - [TTC33_MOUSE]                                                  | 21.76 | 4 | 5  | 5  | 5   | 1.132 | 0.960 | 1.052 | 1.172 | 10.78  | 21.76 | 5  | 5   | 262  | 29.4  | 5.35  |
| D3YTR2   | Receptor expression-<br>enhancing protein 6<br>OS=Mus musculus<br>GN=Reep6 PE=2 SV=1 -<br>[D3YTR2_MOUSE]                                         | 8.92  | 2 | 2  | 2  | 3   | 0.913 | 0.676 | 1.277 | 1.172 | 5.35   | 8.92  | 2  | 3   | 572  | 60.5  | 11.69 |
| A2AC60   | Protein D63003M21Rik<br>OS=Mus musculus<br>GN=D63003M21Rik PE=4<br>SV=1 - [A2AC60_MOUSE]                                                         | 3.44  | 2 | 2  | 2  | 2   | 0.530 | 0.908 | 0.983 | 1.172 | 5.44   | 3.44  | 2  | 2   | 1106 | 120.3 | 6.44  |
| H7BX05   | Obscurin OS=Mus<br>musculus GN=Obscn PE=2<br>SV=2 - [H7BX05_MOUSE]                                                                               | 1.56  | 9 | 9  | 10 | 16  | 1.418 | 1.545 | 1.152 | 1.172 | 23.44  | 1.56  | 12 | 16  | 8032 | 874.0 | 5.96  |
| Q5U4D8   | Sodium-dependent<br>multivitamin transporter<br>OS=Mus musculus<br>GN=Slc5a6 PE=2 SV=2 -<br>[SC5A6_MOUSE]                                        | 2.05  | 1 | 1  | 1  | 2   | 0.757 | 1.558 | 0.961 | 1.172 | 6.97   | 2.05  | 2  | 2   | 634  | 68.5  | 7.85  |
| Q912J5   | UTP--glucose-1-phosphate<br>uridylyltransferase<br>OS=Mus musculus<br>GN=Ugp2 PE=2 SV=3 -<br>[UGPA_MOUSE]                                        | 54.92 | 2 | 27 | 27 | 104 | 0.695 | 1.037 | 1.110 | 1.172 | 313.57 | 54.92 | 49 | 104 | 508  | 56.9  | 7.61  |
| O55100-2 | Isoform 1B of<br>Synaptogyrin-1 OS=Mus<br>musculus GN=Syng1 -<br>[SNG1_MOUSE]                                                                    | 16.23 | 2 | 3  | 3  | 18  | 0.631 | 1.447 | 1.262 | 1.172 | 46.61  | 16.23 | 5  | 18  | 191  | 21.3  | 5.26  |
| F7BWT7   | Tetraspanin-15 OS=Mus<br>musculus GN=Tspan15<br>PE=2 SV=2 -<br>[TSN15_MOUSE]                                                                     | 10.20 | 2 | 3  | 3  | 5   | 0.881 | 0.528 | 1.008 | 1.173 | 15.55  | 10.20 | 3  | 5   | 294  | 33.0  | 5.97  |
| D3Z4H6   | Nucleolysin TIA-1 OS=Mus<br>musculus GN=Tia1 PE=2<br>SV=1 - [D3Z4H6_MOUSE]                                                                       | 24.94 | 6 | 5  | 9  | 31  | 2.167 | 1.595 | 1.039 | 1.173 | 94.72  | 24.94 | 14 | 31  | 385  | 42.7  | 7.99  |
| Q9DAT5   | Mitochondrial tRNA-<br>specific 2-thiouridylase 1<br>OS=Mus musculus<br>GN=Trmu PE=2 SV=1 -<br>[MTU1_MOUSE]                                      | 15.59 | 2 | 6  | 6  | 11  | 0.674 | 0.775 | 0.871 | 1.173 | 36.79  | 15.59 | 9  | 11  | 417  | 47.2  | 8.40  |
| P16390   | Potassium voltage-gated<br>channel subfamily A<br>member 3 OS=Mus<br>musculus GN=Kcna3 PE=2<br>SV=3 - [KCNA3_MOUSE]                              | 23.11 | 2 | 5  | 9  | 67  | 0.868 | 1.010 | 1.158 | 1.173 | 235.00 | 23.11 | 14 | 67  | 528  | 58.5  | 5.33  |
| Q8CFX0   | Protein Wdr17 OS=Mus<br>musculus GN=Wdr17<br>PE=2 SV=1 -<br>[Q8CFX0_MOUSE]                                                                       | 3.61  | 5 | 4  | 4  | 5   | 1.193 | 1.526 | 1.447 | 1.173 | 9.19   | 3.61  | 5  | 5   | 1273 | 141.5 | 6.81  |
| F6Z5N5   | Enoyl-CoA hydratase<br>domain-containing protein<br>2, mitochondrial<br>(Fragment) OS=Mus<br>musculus GN=Echdc2<br>PE=4 SV=1 -<br>[F6Z5N5_MOUSE] | 47.06 | 5 | 4  | 4  | 12  | 0.784 | 1.475 | 0.802 | 1.173 | 25.94  | 47.06 | 7  | 12  | 119  | 12.7  | 10.24 |
| Q7T572   | Inositol-trisphosphate 3-<br>kinase C OS=Mus<br>musculus GN=Itpkc PE=1<br>SV=1 - [IP3KC_MOUSE]                                                   | 4.57  | 1 | 2  | 2  | 3   | 1.704 | 1.141 | 1.044 | 1.173 | 12.37  | 4.57  | 2  | 3   | 678  | 74.4  | 5.36  |
| Q04857   | Collagen alpha-1(VI) chain<br>OS=Mus musculus<br>GN=Col6a1 PE=2 SV=1 -<br>[CO6A1_MOUSE]                                                          | 14.44 | 1 | 12 | 12 | 58  | 0.632 | 4.928 | 0.781 | 1.173 | 172.58 | 14.44 | 21 | 58  | 1025 | 108.4 | 5.36  |
| Q6NVE9   | Protein phosphatase PTC7<br>homolog OS=Mus<br>musculus GN=Pptc7 PE=2<br>SV=1 - [PPTC7_MOUSE]                                                     | 33.87 | 2 | 7  | 7  | 28  | 1.719 | 0.755 | 1.204 | 1.173 | 94.97  | 33.87 | 14 | 28  | 310  | 33.0  | 5.27  |
| Q8R3I2-2 | Isoform 2 of<br>Lysophospholipid<br>acyltransferase 2 OS=Mus<br>musculus GN=Mboat2 -<br>[MBOA2_MOUSE]                                            | 10.06 | 3 | 3  | 3  | 10  | 0.696 | 0.539 | 1.041 | 1.173 | 12.89  | 10.06 | 5  | 10  | 487  | 55.3  | 8.60  |
| Q62245   | Son of sevenless homolog<br>1 OS=Mus musculus<br>GN=Sos1 PE=1 SV=2 -<br>[SOS1_MOUSE]                                                             | 18.04 | 1 | 20 | 25 | 58  | 0.833 | 0.841 | 0.920 | 1.173 | 148.41 | 18.04 | 42 | 58  | 1319 | 150.8 | 6.89  |

|          |                                                                                                                                  |       |    |    |    |     |       |       |       |       |        |       |    |     |      |       |      |
|----------|----------------------------------------------------------------------------------------------------------------------------------|-------|----|----|----|-----|-------|-------|-------|-------|--------|-------|----|-----|------|-------|------|
| Q4VAE3   | Transmembrane protein 65<br>OS=Mus musculus<br>GN=Tmem65 PE=2 SV=1 -<br>[TMM65_MOUSE]                                            | 26.50 | 1  | 6  | 6  | 49  | 0.796 | 1.147 | 1.156 | 1.173 | 130.36 | 26.50 | 12 | 49  | 234  | 24.9  | 7.78 |
| Q00623   | Apolipoprotein A-1<br>OS=Mus musculus<br>GN=Apoa1 PE=1 SV=2 -<br>[APOA1_MOUSE]                                                   | 49.62 | 1  | 17 | 17 | 157 | 3.132 | 3.819 | 0.617 | 1.174 | 428.53 | 49.62 | 31 | 157 | 264  | 30.6  | 5.73 |
| P70699   | Lysosomal alpha-glucosidase<br>OS=Mus musculus GN=Gaa PE=1 SV=2 - [LYAG_MOUSE]                                                   | 26.44 | 4  | 16 | 19 | 139 | 1.394 | 1.067 | 0.842 | 1.174 | 451.90 | 26.44 | 38 | 139 | 953  | 106.2 | 5.83 |
| Q8R4H2   | Rho guanine nucleotide exchange factor 12<br>OS=Mus musculus<br>GN=Arhgef12 PE=1 SV=2 -<br>[ARHGC_MOUSE]                         | 31.37 | 1  | 1  | 36 | 107 | 0.664 | 0.749 | 1.150 | 1.174 | 305.49 | 31.37 | 61 | 107 | 1543 | 172.2 | 5.74 |
| Q8CHP8   | Phosphoglycolate phosphatase<br>OS=Mus musculus GN=Pgp PE=2 SV=1 - [PGP_MOUSE]                                                   | 56.70 | 1  | 15 | 15 | 98  | 1.364 | 0.901 | 0.993 | 1.174 | 274.77 | 56.70 | 29 | 98  | 321  | 34.5  | 5.35 |
| Q9R0S0   | GADD45G<br>OS=Mus musculus GN=Gadd45g PE=2 SV=1 -<br>[Q9R0S0_MOUSE]                                                              | 3.77  | 2  | 1  | 1  | 1   | 1.378 | 1.470 | 1.731 | 1.174 | 2.90   | 3.77  | 1  | 1   | 159  | 17.3  | 4.30 |
| Q9D483   | DNA-directed RNA polymerase III subunit RPC3<br>OS=Mus musculus<br>GN=Polr3c PE=2 SV=1 -<br>[RPC3_MOUSE]                         | 4.69  | 3  | 3  | 3  | 4   | 0.581 | 1.041 | 1.172 | 1.174 | 4.15   | 4.69  | 4  | 4   | 533  | 60.7  | 7.58 |
| Q6PFK7-2 | Isoform 2 of Neuronal tyrosine-phosphorylated phosphoinositide-3-kinase adapter 1<br>OS=Mus musculus GN=Nyap1 -<br>[NYAP1_MOUSE] | 15.14 | 4  | 10 | 10 | 28  | 0.891 | 0.785 | 1.046 | 1.174 | 61.30  | 15.14 | 18 | 28  | 832  | 87.5  | 9.55 |
| Q80X14   | Phosphatidylinositol 5-phosphate 4-kinase type-2 beta<br>OS=Mus musculus<br>GN=Pip4k2b PE=1 SV=1 -<br>[P142B_MOUSE]              | 49.28 | 1  | 17 | 23 | 81  | 0.708 | 1.184 | 1.205 | 1.174 | 230.56 | 49.28 | 35 | 81  | 416  | 47.3  | 7.33 |
| Q8C163   | Nuclease EXOG, mitochondrial<br>OS=Mus musculus GN=Exog PE=2 SV=1 - [EXOG_MOUSE]                                                 | 41.58 | 2  | 12 | 13 | 49  | 0.910 | 1.232 | 1.058 | 1.174 | 148.49 | 41.58 | 22 | 49  | 368  | 41.4  | 8.12 |
| Q922G0   | Solute carrier family 25 member 36<br>OS=Mus musculus GN=Slc25a36 PE=2 SV=1 -                                                    | 10.61 | 4  | 3  | 3  | 7   | 0.676 | 0.957 | 0.854 | 1.174 | 22.11  | 10.61 | 5  | 7   | 311  | 34.1  | 8.65 |
| P20033-2 | Isoform Short of Platelet-derived growth factor subunit A<br>OS=Mus musculus GN=Pdgfa -<br>[PDGFA_MOUSE]                         | 9.18  | 4  | 1  | 1  | 4   | 2.080 | 1.386 | 0.902 | 1.175 | 8.48   | 9.18  | 2  | 4   | 196  | 22.3  | 8.21 |
| Q8C863   | E3 ubiquitin-protein ligase Itchy<br>OS=Mus musculus GN=Itch PE=1 SV=2 -<br>[ITCH_MOUSE]                                         | 21.06 | 2  | 12 | 16 | 42  | 0.711 | 0.904 | 1.131 | 1.175 | 126.60 | 21.06 | 25 | 42  | 864  | 98.9  | 6.28 |
| Q9D016   | WD repeat, SAM and U-box domain-containing protein 1<br>OS=Mus musculus GN=Wdsub1 PE=2 SV=1 -<br>[WDSUB1_MOUSE]                  | 14.14 | 3  | 5  | 6  | 14  | 1.325 | 0.843 | 0.899 | 1.175 | 36.54  | 14.14 | 10 | 14  | 474  | 51.7  | 6.34 |
| E9Q5B5   | Hexokinase-2<br>OS=Mus musculus GN=Hk2 PE=2 SV=1 - [E9Q5B5_MOUSE]                                                                | 9.34  | 3  | 2  | 9  | 71  | 0.974 | 1.343 | 1.004 | 1.175 | 201.95 | 9.34  | 14 | 71  | 889  | 99.2  | 6.09 |
| P46097   | Synaptotagmin-2<br>OS=Mus musculus GN=Syt2 PE=1 SV=1 - [SYT2_MOUSE]                                                              | 44.31 | 1  | 11 | 20 | 154 | 0.898 | 0.211 | 0.915 | 1.175 | 448.76 | 44.31 | 38 | 154 | 422  | 47.2  | 7.99 |
| Q8CSJ7   | Regulator of G-protein-signalling 20<br>OS=Mus musculus GN=Rgs20 PE=2 SV=1 - [Q8CSJ7_MOUSE]                                      | 23.08 | 4  | 3  | 4  | 17  | 0.599 | 1.403 | 1.768 | 1.175 | 54.23  | 23.08 | 8  | 17  | 208  | 23.9  | 5.11 |
| Q561M1   | Acp1 protein<br>OS=Mus musculus GN=Acp1 PE=2 SV=1 - [Q561M1_MOUSE]                                                               | 47.47 | 2  | 2  | 7  | 32  | 1.381 | 1.027 | 0.996 | 1.175 | 89.69  | 47.47 | 10 | 32  | 158  | 17.9  | 6.54 |
| Q9QZS3-4 | Isoform 4 of Protein numb homolog<br>OS=Mus musculus GN=Numb -<br>[NUMB_MOUSE]                                                   | 28.16 | 10 | 11 | 14 | 46  | 1.115 | 1.198 | 1.702 | 1.175 | 109.45 | 28.16 | 26 | 46  | 593  | 64.4  | 8.47 |
| Q8K3W0   | BRCA1-A complex subunit BRE<br>OS=Mus musculus<br>GN=Bre PE=1 SV=2 -<br>[BRE_MOUSE]                                              | 24.80 | 8  | 9  | 9  | 28  | 0.847 | 1.122 | 1.065 | 1.175 | 75.99  | 24.80 | 16 | 28  | 383  | 43.5  | 5.94 |
| P99028   | Cytochrome b-c1 complex subunit 6, mitochondrial<br>OS=Mus musculus<br>GN=Uqcrrh PE=1 SV=2 -<br>[QCR6_MOUSE]                     | 48.31 | 2  | 5  | 5  | 198 | 2.259 | 1.103 | 1.707 | 1.175 | 751.85 | 48.31 | 9  | 198 | 89   | 10.4  | 4.87 |
| Q9J138   | tRNA pseudouridine(38/39) synthase<br>OS=Mus musculus GN=Pus3 PE=1 SV=2 - [PUS3_MOUSE]                                           | 3.74  | 2  | 2  | 2  | 2   | 0.720 | 1.071 | 1.010 | 1.175 | 2.30   | 3.74  | 2  | 2   | 481  | 55.5  | 8.12 |
| G3UWA6   | 4F2 cell-surface antigen heavy chain<br>OS=Mus musculus GN=Slc3a2 PE=4 SV=1 -<br>[G3UWA6_MOUSE]                                  | 47.08 | 2  | 22 | 22 | 145 | 0.705 | 1.011 | 0.960 | 1.175 | 387.72 | 47.08 | 38 | 145 | 565  | 62.2  | 5.50 |
| Q8K1Z0   | Ubiquinone biosynthesis protein COQ9, mitochondrial<br>OS=Mus musculus GN=Coq9 PE=1 SV=1 - [COQ9_MOUSE]                          | 21.73 | 2  | 6  | 6  | 38  | 1.126 | 1.641 | 1.121 | 1.175 | 118.58 | 21.73 | 12 | 38  | 313  | 35.1  | 5.92 |
| Q9CWQ0   | Diphthine synthase<br>OS=Mus musculus<br>GN=Dph5 PE=2 SV=2 -<br>[DPH5_MOUSE]                                                     | 16.01 | 1  | 3  | 3  | 5   | 1.702 | 0.979 | 0.907 | 1.175 | 21.55  | 16.01 | 5  | 5   | 281  | 31.2  | 5.29 |

|          |                                                                                                                        |       |   |    |    |     |       |       |       |       |         |       |    |     |      |       |       |
|----------|------------------------------------------------------------------------------------------------------------------------|-------|---|----|----|-----|-------|-------|-------|-------|---------|-------|----|-----|------|-------|-------|
| B1APT1   | Metallophosphoesterase<br>MPPE2 (Fragment)<br>OS=Mus musculus<br>GN=Mpped2 PE=4 SV=1 -<br>[B1APT1_MOUSE]               | 12.37 | 3 | 2  | 2  | 9   | 1.427 | 0.967 | 1.077 | 1.176 | 39.88   | 12.37 | 4  | 9   | 283  | 32.2  | 6.46  |
| Q9Z1Q2   | Abhydrolase domain-<br>containing protein 16A<br>OS=Mus musculus<br>GN=Abhd16a PE=1 SV=3 -<br>[ABHGA_MOUSE]            | 36.56 | 6 | 16 | 16 | 52  | 0.827 | 1.095 | 1.031 | 1.176 | 177.82  | 36.56 | 29 | 52  | 558  | 63.0  | 8.25  |
| P56565   | Protein S100-A1 OS=Mus<br>musculus GN=S100a1<br>PE=1 SV=2 -<br>[S10A1_MOUSE]                                           | 19.15 | 2 | 2  | 2  | 16  | 1.309 | 0.917 | 1.232 | 1.176 | 45.67   | 19.15 | 3  | 16  | 94   | 10.5  | 4.50  |
| P05202   | Aspartate<br>aminotransferase,<br>mitochondrial OS=Mus<br>musculus GN=Got2 PE=1<br>SV=1 - [AATM_MOUSE]                 | 77.44 | 1 | 35 | 36 | 698 | 1.873 | 1.098 | 0.961 | 1.176 | 1849.68 | 77.44 | 71 | 698 | 430  | 47.4  | 9.00  |
| Q8BVG5-2 | Isoform 2 of Polypeptide N-<br>acetylgalactosaminyltransf<br>erase 14 OS=Mus<br>musculus GN=Galnt14 -<br>[GLT14_MOUSE] | 4.43  | 3 | 1  | 2  | 6   | 0.510 | 0.958 | 0.859 | 1.176 | 16.10   | 4.43  | 3  | 6   | 429  | 50.0  | 8.41  |
| Q8C1Y8   | Vacuolar fusion protein<br>CCZ1 homolog OS=Mus<br>musculus GN=Ccz1 PE=1<br>SV=1 - [CCZ1_MOUSE]                         | 16.04 | 1 | 7  | 7  | 13  | 1.031 | 1.124 | 1.187 | 1.176 | 30.37   | 16.04 | 11 | 13  | 480  | 55.5  | 6.02  |
| B1H3M0   | OXR1 short isoform C7C<br>OS=Mus musculus<br>GN=Oxr1 PE=2 SV=1 -<br>[B1H3M0_MOUSE]                                     | 47.22 | 1 | 1  | 8  | 37  | 1.078 | 0.849 | 1.034 | 1.177 | 102.13  | 47.22 | 15 | 37  | 216  | 24.4  | 6.43  |
| Q9E777   | Junctophilin-3 OS=Mus<br>musculus GN=Jph3 PE=1<br>SV=1 - [JPH3_MOUSE]                                                  | 20.56 | 2 | 14 | 14 | 33  | 1.023 | 1.104 | 1.526 | 1.177 | 80.14   | 20.56 | 22 | 33  | 744  | 81.2  | 9.22  |
| P52196   | Thiosulfate<br>sulfurtransferase OS=Mus<br>musculus GN=Tst PE=1<br>SV=3 - [THTR_MOUSE]                                 | 45.45 | 1 | 14 | 14 | 64  | 0.877 | 0.776 | 0.820 | 1.177 | 209.66  | 45.45 | 25 | 64  | 297  | 33.4  | 7.85  |
| Q9EPK7   | Exportin-7 OS=Mus<br>musculus GN=Xpo7 PE=2<br>SV=3 - [XPO7_MOUSE]                                                      | 31.37 | 3 | 30 | 30 | 107 | 0.855 | 1.405 | 0.994 | 1.177 | 305.02  | 31.37 | 51 | 107 | 1087 | 123.7 | 6.38  |
| B8ZX1-2  | Isoform 2 of Queuine tRNA<br>ribosyltransferase subunit<br>QTRTD1 OS=Mus<br>musculus GN=Qtrtd1 -<br>[QTRD1_MOUSE]      | 15.99 | 2 | 3  | 3  | 3   | 1.542 | 1.402 | 1.008 | 1.177 | 12.76   | 15.99 | 3  | 3   | 344  | 38.3  | 6.52  |
| Q8BGW6-2 | Isoform 2 of<br>Serine/threonine-protein<br>kinase 32A OS=Mus<br>musculus GN=Stk32a -<br>[ST32A_MOUSE]                 | 9.78  | 2 | 2  | 2  | 3   | 1.269 | 1.294 | 1.280 | 1.177 | 4.10    | 9.78  | 3  | 3   | 368  | 43.2  | 6.40  |
| O88188   | Lymphocyte antigen 86<br>OS=Mus musculus<br>GN=Ly86 PE=1 SV=1 -<br>[LY86_MOUSE]                                        | 5.56  | 1 | 1  | 1  | 2   | 1.508 | 0.976 | 1.037 | 1.177 | 3.91    | 5.56  | 2  | 2   | 162  | 17.8  | 5.22  |
| G3X9A7   | MCG49978 OS=Mus<br>musculus GN=Ploxd3<br>PE=4 SV=1 -<br>[G3X9A7_MOUSE]                                                 | 43.30 | 1 | 12 | 12 | 40  | 0.863 | 1.509 | 1.109 | 1.177 | 126.83  | 43.30 | 18 | 40  | 321  | 36.3  | 6.46  |
| P97794   | ATP-sensitive inward<br>rectifier potassium channel<br>8 OS=Mus musculus<br>GN=Kcnj8 PE=2 SV=1 -<br>[IRK8_MOUSE]       | 11.56 | 1 | 2  | 2  | 3   | 0.852 | 0.612 | 1.190 | 1.177 | 2.89    | 11.56 | 2  | 3   | 424  | 47.9  | 9.20  |
| B2RUF0   | Y box protein 2 OS=Mus<br>musculus GN=Ybx2 PE=2<br>SV=1 - [B2RUF0_MOUSE]                                               | 9.75  | 3 | 1  | 3  | 5   | 0.770 | 1.292 | 1.304 | 1.177 | 9.48    | 9.75  | 4  | 5   | 359  | 38.1  | 10.76 |
| Q3THG9   | Alanyl-tRNA editing protein<br>Aarsd1 OS=Mus musculus<br>GN=Aarsd1 PE=1 SV=2 -<br>[AASD1_MOUSE]                        | 37.38 | 3 | 12 | 12 | 36  | 1.010 | 0.907 | 0.873 | 1.177 | 112.90  | 37.38 | 22 | 36  | 412  | 44.9  | 6.42  |
| Q8BR63   | Protein FAM177A1<br>OS=Mus musculus<br>GN=Fam177a1 PE=2<br>SV=1 - [F177A_MOUSE]                                        | 31.88 | 1 | 5  | 5  | 29  | 1.321 | 0.587 | 1.095 | 1.177 | 107.69  | 31.88 | 10 | 29  | 207  | 23.6  | 4.59  |
| Q5NCJ0   | Protein Rappgef6 OS=Mus<br>musculus GN=Rappgef6<br>PE=2 SV=1 -<br>[Q5NCJ0_MOUSE]                                       | 9.56  | 6 | 8  | 14 | 25  | 1.274 | 0.995 | 1.127 | 1.178 | 67.82   | 9.56  | 20 | 25  | 1601 | 179.1 | 6.35  |
| E9Q4K0   | Actin-binding LIM protein<br>2 OS=Mus musculus<br>GN=Abim2 PE=2 SV=1 -<br>[E9Q4K0_MOUSE]                               | 49.70 | 4 | 4  | 25 | 161 | 2.183 | 0.758 | 1.670 | 1.178 | 516.75  | 49.70 | 46 | 161 | 664  | 73.6  | 8.07  |
| Q7TNF0   | Double C2-like domain-<br>containing protein alpha<br>OS=Mus musculus<br>GN=Doc2a PE=2 SV=1 -<br>[DOC2A_MOUSE]         | 28.15 | 6 | 8  | 10 | 38  | 0.743 | 1.171 | 1.172 | 1.178 | 109.65  | 28.15 | 17 | 38  | 405  | 44.6  | 7.12  |
| O08915   | AH receptor-interacting<br>protein OS=Mus musculus<br>GN=Aip PE=1 SV=1 -<br>[AIP_MOUSE]                                | 40.00 | 2 | 11 | 11 | 33  | 1.011 | 0.945 | 1.097 | 1.178 | 88.25   | 40.00 | 19 | 33  | 330  | 37.6  | 6.40  |
| Q9DD18-2 | Isoform 2 of D-tyrosyl-<br>tRNA(Tyr) deacylase 1<br>OS=Mus musculus<br>GN=Dtd1 -                                       | 30.85 | 2 | 4  | 4  | 21  | 0.690 | 0.886 | 1.043 | 1.178 | 63.03   | 30.85 | 6  | 21  | 201  | 22.5  | 8.76  |
| Q8BWR2   | PITH domain-containing<br>protein 1 OS=Mus<br>musculus GN=Pithd1 PE=2<br>SV=1 - [PITH1_MOUSE]                          | 55.45 | 4 | 11 | 11 | 73  | 2.065 | 1.124 | 0.940 | 1.178 | 198.99  | 55.45 | 21 | 73  | 211  | 24.2  | 5.74  |
| P70704   | Probable phospholipid-<br>transporting ATPase 1A<br>OS=Mus musculus<br>GN=Atp8a1 PE=1 SV=1 -<br>[AT8A1_MOUSE]          | 32.11 | 5 | 1  | 34 | 183 | 0.849 | 0.989 | 0.926 | 1.178 | 527.99  | 32.11 | 61 | 183 | 1149 | 129.7 | 7.27  |



|          |                                                                                                                   |       |     |    |    |      |        |       |       |       |         |       |     |      |      |       |       |
|----------|-------------------------------------------------------------------------------------------------------------------|-------|-----|----|----|------|--------|-------|-------|-------|---------|-------|-----|------|------|-------|-------|
| Q8BK75-2 | Isoform 2 of Elongator complex protein 6 OS=Mus musculus GN=Elp6 - [ELP6_MOUSE]                                   | 21.15 | 2   | 4  | 4  | 6    | 0.711  | 1.163 | 1.081 | 1.178 | 16.92   | 21.15 | 5   | 6    | 260  | 28.3  | 6.79  |
| F7D8Z3   | Uncharacterized protein OS=Mus musculus GN=Gm9894 PE=4 SV=2 - [F7D8Z3_MOUSE]                                      | 4.31  | 145 | 1  | 2  | 2    | 23.986 | 1.356 | 1.252 | 1.178 | 4.25    | 4.31  | 2   | 2    | 371  | 43.6  | 8.87  |
| F8VPZ3   | Ubiquitin carboxyl-terminal hydrolase OS=Mus musculus GN=Usp32 PE=2 SV=1 - [F8VPZ3_MOUSE]                         | 17.08 | 4   | 19 | 19 | 44   | 0.798  | 0.995 | 1.053 | 1.179 | 113.42  | 17.08 | 31  | 44   | 1604 | 181.6 | 6.51  |
| F2Z3Y1   | DNA-3-methyladenine glycosylase OS=Mus musculus GN=Mpg PE=4 SV=1 - [F2Z3Y1_MOUSE]                                 | 7.53  | 2   | 1  | 1  | 2    | 0.881  | 1.510 | 1.407 | 1.179 | 3.13    | 7.53  | 1   | 2    | 146  | 15.8  | 10.83 |
| Q9EQ80   | NIF3-like protein 1 OS=Mus musculus GN=Nif3l1 PE=1 SV=4 - [NIF3L_MOUSE]                                           | 26.33 | 3   | 9  | 9  | 40   | 0.980  | 0.831 | 0.926 | 1.179 | 120.64  | 26.33 | 17  | 40   | 376  | 41.7  | 6.76  |
| B0R091   | Protein Gm20056 OS=Mus musculus GN=Chp1 PE=2 SV=1 - [B0R091_MOUSE]                                                | 79.58 | 3   | 14 | 14 | 68   | 1.134  | 0.967 | 0.981 | 1.179 | 190.54  | 79.58 | 25  | 68   | 191  | 22.0  | 4.93  |
| Q7TNY3   | Calcipressin 1 large isoform OS=Mus musculus GN=Rcan1 PE=2 SV=1 - [Q7TNY3_MOUSE]                                  | 15.94 | 4   | 3  | 4  | 18   | 1.078  | 1.643 | 1.397 | 1.179 | 54.07   | 15.94 | 8   | 18   | 251  | 28.1  | 5.41  |
| Q8K1M3   | Protein kinase, cAMP dependent regulatory, type II alpha OS=Mus musculus GN=Prkar2a PE=2 SV=1 - [Q8K1M3_MOUSE]    | 55.97 | 2   | 16 | 22 | 110  | 0.895  | 1.591 | 0.977 | 1.180 | 334.89  | 55.97 | 38  | 110  | 402  | 45.6  | 4.93  |
| AZAHC7   | Protein Gm6592 OS=Mus musculus GN=Gm6592 PE=4 SV=1 - [AZAHC7_MOUSE]                                               | 5.36  | 1   | 1  | 1  | 1    | 0.432  | 0.881 | 1.209 | 1.180 | 2.29    | 5.36  | 1   | 1    | 168  | 19.4  | 5.08  |
| Q60932-2 | Isoform Mt-VDAC1 of Voltage-dependent anion-selective channel protein 1 OS=Mus musculus GN=Vdac1 - [Q60932_MOUSE] | 78.09 | 3   | 20 | 22 | 974  | 0.961  | 1.126 | 1.192 | 1.180 | 2989.33 | 78.09 | 40  | 974  | 283  | 30.7  | 8.54  |
| D3Z3P2   | Occludin/ELL domain-containing protein 1 OS=Mus musculus GN=Ocel1 PE=2 SV=1 - [D3Z3P2_MOUSE]                      | 8.89  | 1   | 1  | 1  | 1    | 2.423  | 1.322 | 1.043 | 1.180 | 2.17    | 8.89  | 1   | 1    | 135  | 15.1  | 11.75 |
| A2AEG6   | Glycoprotein m6b, isoform CRA_g OS=Mus musculus GN=Gpm6b PE=4 SV=1 - [A2AEG6_MOUSE]                               | 18.90 | 6   | 2  | 6  | 36   | 0.926  | 1.460 | 1.951 | 1.180 | 85.59   | 18.90 | 12  | 36   | 328  | 36.2  | 6.14  |
| Q69ZK9   | Neuroigin-2 OS=Mus musculus GN=Nlgn2 PE=1 SV=2 - [NLGN2_MOUSE]                                                    | 27.99 | 2   | 14 | 17 | 91   | 0.610  | 1.105 | 1.055 | 1.180 | 253.69  | 27.99 | 32  | 91   | 836  | 90.9  | 6.18  |
| P42125   | Enoyl-CoA delta isomerase 1, mitochondrial OS=Mus musculus GN=Ec1l PE=2 SV=2 - [EC1L_MOUSE]                       | 50.17 | 1   | 12 | 12 | 67   | 1.955  | 1.181 | 0.864 | 1.180 | 223.56  | 50.17 | 22  | 67   | 289  | 32.2  | 8.98  |
| Q91W45   | Polyadenylate-binding protein-interacting protein 2B OS=Mus musculus GN=Paip2b PE=2 SV=2 - [PAIP2B_MOUSE]         | 19.12 | 1   | 1  | 2  | 3    | 2.860  | 1.563 | 1.600 | 1.181 | 10.56   | 19.12 | 3   | 3    | 136  | 15.5  | 4.32  |
| Q805W1   | Putative adenosylhomocysteinase 2 OS=Mus musculus GN=Ahcy1 PE=1 SV=1 - [Q805W1_MOUSE]                             | 58.87 | 5   | 13 | 35 | 342  | 0.793  | 0.809 | 0.974 | 1.181 | 995.59  | 58.87 | 65  | 342  | 530  | 58.9  | 6.89  |
| Q8K157   | Aldose 1-epimerase OS=Mus musculus GN=Galm PE=2 SV=1 - [GALM_MOUSE]                                               | 7.31  | 1   | 2  | 2  | 8    | 4.180  | 2.413 | 1.250 | 1.181 | 26.56   | 7.31  | 3   | 8    | 342  | 37.8  | 6.74  |
| E0CYM0   | Protein 1700019G17Rik OS=Mus musculus GN=1700019G17Rik PE=2 SV=1 - [E0CYM0_MOUSE]                                 | 11.76 | 2   | 1  | 1  | 1    | 2.302  | 1.432 | 1.192 | 1.181 | 2.47    | 11.76 | 1   | 1    | 136  | 15.3  | 8.06  |
| Q6P1G0   | HEAT repeat-containing protein 6 OS=Mus musculus GN=Heatr6 PE=2 SV=1 - [Q6P1G0_MOUSE]                             | 6.59  | 1   | 4  | 5  | 11   | 1.289  | 1.095 | 1.011 | 1.181 | 14.26   | 6.59  | 6   | 11   | 1184 | 128.8 | 7.24  |
| Q6ZPE2-2 | Isoform 2 of Myotubularin-related protein 5 OS=Mus musculus GN=Sbf1 - [MTMR5_MOUSE]                               | 32.33 | 6   | 48 | 52 | 196  | 0.638  | 0.987 | 1.180 | 1.181 | 597.87  | 32.33 | 95  | 196  | 1893 | 211.3 | 7.33  |
| Q9JHK4   | Geranylgeranyl transferase type-2 subunit alpha OS=Mus musculus GN=Rabgga PE=1 SV=1 - [PGTA_MOUSE]                | 44.62 | 2   | 21 | 21 | 75   | 0.849  | 1.049 | 1.010 | 1.181 | 233.78  | 44.62 | 38  | 75   | 567  | 64.9  | 5.80  |
| Q8BHL3   | TBC1 domain family member 10B OS=Mus musculus GN=Tbc1d10b PE=1 SV=2 - [Q8BHL3_MOUSE]                              | 36.97 | 1   | 17 | 17 | 91   | 0.707  | 0.882 | 1.092 | 1.181 | 307.13  | 36.97 | 31  | 91   | 798  | 87.2  | 8.90  |
| J3KMK0   | Uncharacterized protein OS=Mus musculus GN=Gm9923 PE=4 SV=1 - [J3KMK0_MOUSE]                                      | 16.50 | 3   | 3  | 8  | 18   | 1.592  | 1.387 | 1.378 | 1.181 | 50.45   | 16.50 | 14  | 18   | 612  | 67.4  | 5.71  |
| Q9WTR6   | Cystine/glutamate transporter OS=Mus musculus GN=Slc7a11 PE=1 SV=1 - [Q9WTR6_MOUSE]                               | 6.77  | 1   | 3  | 3  | 37   | 0.495  | 1.466 | 1.092 | 1.181 | 105.57  | 6.77  | 5   | 37   | 502  | 55.4  | 9.23  |
| Q8VDN2   | Sodium/potassium-transporting ATPase subunit alpha-1 OS=Mus musculus GN=Atp1a1 PE=1 SV=1 - [Q8VDN2_MOUSE]         | 54.45 | 1   | 31 | 61 | 2252 | 0.608  | 1.398 | 1.488 | 1.182 | 6617.10 | 54.45 | 115 | 2252 | 1023 | 112.9 | 5.45  |

|        |                                                                                                                    |       |     |    |    |     |       |       |       |       |        |       |    |     |      |       |      |
|--------|--------------------------------------------------------------------------------------------------------------------|-------|-----|----|----|-----|-------|-------|-------|-------|--------|-------|----|-----|------|-------|------|
| A2ALW2 | Protein Zkscan16 OS=Mus musculus GN=Zkscan16 PE=4 SV=1 - [A2ALW2_MOUSE]                                            | 7.28  | 145 | 4  | 6  | 7   | 0.591 | 0.986 | 0.829 | 1.182 | 15.33  | 7.28  | 7  | 7   | 728  | 83.8  | 8.91 |
| Q9D456 | MCG10597 OS=Mus musculus GN=4930564B18Rik PE=2 SV=1 - [Q9D456_MOUSE]                                               | 7.73  | 1   | 1  | 1  | 1   | 2.727 | 1.090 | 0.884 | 1.182 | 0.00   | 7.73  | 1  | 1   | 220  | 24.7  | 4.65 |
| Q80XK6 | Autophagy-related protein 2 homolog B OS=Mus musculus GN=Atg2b PE=1 SV=3 - [ATG2B_MOUSE]                           | 12.67 | 3   | 24 | 24 | 56  | 0.770 | 0.914 | 1.048 | 1.182 | 161.94 | 12.67 | 39 | 56  | 2075 | 231.3 | 5.88 |
| P48722 | Heat shock 70 kDa protein 4L OS=Mus musculus GN=Hspa4l PE=1 SV=2 - [HS74L_MOUSE]                                   | 62.41 | 5   | 47 | 51 | 346 | 0.923 | 0.738 | 1.091 | 1.182 | 996.62 | 62.41 | 90 | 346 | 838  | 94.3  | 5.74 |
| D3Z0R2 | Protein phosphatase 1 regulatory subunit 36 OS=Mus musculus GN=Ppp1r36 PE=3 SV=1 - [PPR36_MOUSE]                   | 4.87  | 1   | 2  | 2  | 4   | 0.639 | 1.087 | 1.471 | 1.182 | 9.45   | 4.87  | 2  | 4   | 411  | 47.3  | 9.36 |
| Q8BQU3 | Protein ACN9 homolog, mitochondrial OS=Mus musculus GN=Acn9 PE=2 SV=1 - [ACN9_MOUSE]                               | 50.40 | 1   | 5  | 5  | 12  | 1.244 | 0.761 | 0.940 | 1.182 | 33.90  | 50.40 | 9  | 12  | 125  | 14.5  | 9.07 |
| Q8BMG8 | Mitochondrial folate transporter/carrier OS=Mus musculus GN=Slc25a32 PE=2 SV=1 - [MFTC_MOUSE]                      | 6.96  | 1   | 2  | 2  | 5   | 0.962 | 1.289 | 1.138 | 1.182 | 11.33  | 6.96  | 4  | 5   | 316  | 35.0  | 9.47 |
| Q9D211 | CDKN2AIP N-terminal-like protein OS=Mus musculus GN=Cdkn2aipnl PE=2 SV=1 - [C2AIL_MOUSE]                           | 20.69 | 1   | 1  | 2  | 3   | 2.083 | 1.963 | 1.217 | 1.183 | 6.19   | 20.69 | 3  | 3   | 116  | 13.2  | 5.29 |
| Q8BGB7 | Enolase-phosphatase E1 OS=Mus musculus GN=Enoph1 PE=2 SV=1 - [ENOPH_MOUSE]                                         | 35.02 | 2   | 7  | 7  | 38  | 0.754 | 1.265 | 1.049 | 1.183 | 112.68 | 35.02 | 13 | 38  | 257  | 28.6  | 4.92 |
| Q8R0Y6 | Cytosolic 10-formyltetrahydrofolate dehydrogenase OS=Mus musculus GN=Aldh1l1 PE=2 SV=1 - [A111_MOUSE]              | 65.30 | 1   | 43 | 51 | 274 | 0.724 | 0.842 | 0.971 | 1.183 | 791.26 | 65.30 | 91 | 274 | 902  | 98.6  | 5.91 |
| Q8K1S2 | Netrin receptor UNC5D OS=Mus musculus GN=Unc5d PE=2 SV=1 - [UNC5D_MOUSE]                                           | 6.90  | 1   | 5  | 5  | 12  | 0.680 | 1.827 | 0.916 | 1.183 | 33.52  | 6.90  | 8  | 12  | 956  | 106.3 | 6.14 |
| E9QJ0  | Protein 4833403115RIK OS=Mus musculus GN=4833403115RIK PE=4 SV=1 - [E9QJ0_MOUSE]                                   | 0.71  | 1   | 1  | 1  | 3   | 1.637 | 0.760 | 1.537 | 1.183 | 8.73   | 0.71  | 1  | 3   | 991  | 113.2 | 5.47 |
| Q9CQ75 | NADH dehydrogenase [ubiquinone] 1 alpha subcomplex subunit 2 OS=Mus musculus GN=Ndufa2 PE=1 SV=3 - [NDUFA2_MOUSE]  | 66.67 | 1   | 9  | 10 | 105 | 1.171 | 1.122 | 1.127 | 1.183 | 304.30 | 66.67 | 17 | 105 | 99   | 10.9  | 9.99 |
| Q80ZW2 | Protein THEM6 OS=Mus musculus GN=Them6 PE=2 SV=1 - [THEM6_MOUSE]                                                   | 38.65 | 1   | 8  | 8  | 30  | 0.983 | 0.492 | 1.237 | 1.183 | 92.93  | 38.65 | 16 | 30  | 207  | 23.8  | 9.11 |
| E9Q933 | Transmembrane protein 11, mitochondrial OS=Mus musculus GN=Tmem11 PE=2 SV=1 - [E9Q933_MOUSE]                       | 15.34 | 2   | 3  | 3  | 8   | 0.619 | 1.277 | 1.085 | 1.183 | 19.48  | 15.34 | 6  | 8   | 176  | 19.8  | 6.25 |
| Q8BRC6 | Protein MAATS1 OS=Mus musculus GN=Maats1 PE=2 SV=3 - [MAAT1_MOUSE]                                                 | 1.92  | 1   | 1  | 1  | 4   | 1.453 | 1.433 | 0.864 | 1.183 | 2.70   | 1.92  | 2  | 4   | 783  | 91.6  | 6.83 |
| Q9Z188 | Dual specificity tyrosine-phosphorylation-regulated kinase 1B OS=Mus musculus GN=Dyrk1b PE=1 SV=3 - [DYRK1B_MOUSE] | 12.40 | 3   | 4  | 6  | 14  | 1.314 | 1.402 | 1.119 | 1.183 | 33.53  | 12.40 | 8  | 14  | 629  | 69.1  | 9.09 |
| E9Q350 | BAI1-associated protein 3 OS=Mus musculus GN=Baiap3 PE=4 SV=1 - [E9Q350_MOUSE]                                     | 22.17 | 3   | 21 | 21 | 71  | 0.690 | 0.755 | 0.594 | 1.184 | 218.09 | 22.17 | 38 | 71  | 1150 | 129.0 | 6.25 |
| P03958 | Adenosine deaminase OS=Mus musculus GN=Ada PE=1 SV=3 - [ADA_MOUSE]                                                 | 8.52  | 1   | 2  | 2  | 3   | 0.862 | 1.101 | 0.654 | 1.184 | 10.37  | 8.52  | 3  | 3   | 352  | 40.0  | 5.72 |
| Q5EG47 | 5'-AMP-activated protein kinase catalytic subunit alpha-1 OS=Mus musculus GN=Pfkfb1 PE=1 SV=2 - [AAPK1_MOUSE]      | 24.69 | 1   | 7  | 11 | 40  | 0.751 | 0.981 | 1.055 | 1.184 | 130.60 | 24.69 | 18 | 40  | 559  | 63.9  | 8.12 |
| P50114 | Protein S100-B OS=Mus musculus GN=S100b PE=2 SV=2 - [S100B_MOUSE]                                                  | 85.87 | 1   | 4  | 5  | 167 | 2.239 | 0.816 | 1.384 | 1.184 | 545.41 | 85.87 | 10 | 167 | 92   | 10.7  | 4.55 |
| Q14BN8 | RWD domain containing 2, isoform CRA_a OS=Mus musculus GN=Rwdd2a PE=2 SV=1 - [Q14BN8_MOUSE]                        | 8.90  | 2   | 2  | 2  | 5   | 0.576 | 0.933 | 0.695 | 1.184 | 14.24  | 8.90  | 3  | 5   | 292  | 33.8  | 5.87 |
| F8VQN6 | Rho guanine nucleotide exchange factor 12 OS=Mus musculus GN=Arhgef12 PE=2 SV=1 - [F8VQN6_MOUSE]                   | 31.41 | 1   | 1  | 36 | 105 | 5.536 | 1.148 | 2.450 | 1.184 | 292.54 | 31.41 | 60 | 105 | 1544 | 172.4 | 5.74 |
| P23506 | Protein-L-isoaspartate(D-aspartate) O-methyltransferase OS=Mus musculus GN=Pcmt1 PE=1 SV=3 - [P1MT_MOUSE]          | 75.33 | 7   | 15 | 16 | 124 | 1.119 | 1.280 | 1.165 | 1.184 | 315.26 | 75.33 | 28 | 124 | 227  | 24.6  | 7.65 |

|          |                                                                                                                            |       |   |    |    |     |       |       |       |       |        |       |    |     |      |       |       |
|----------|----------------------------------------------------------------------------------------------------------------------------|-------|---|----|----|-----|-------|-------|-------|-------|--------|-------|----|-----|------|-------|-------|
| Q0GNC1-3 | Isoform 2 of Inverted formin-2 OS=Mus musculus GN=Inf2 - [INF2_MOUSE]                                                      | 15.98 | 5 | 14 | 16 | 61  | 0.921 | 0.410 | 1.797 | 1.184 | 173.48 | 15.98 | 26 | 61  | 1264 | 1374  | 5.31  |
| Q9D1D6   | Collagen triple helix repeat-containing protein 1 OS=Mus musculus GN=Cttrc1 PE=2 SV=2 - [CTHR1_MOUSE]                      | 4.90  | 1 | 1  | 1  | 6   | 1.562 | 0.544 | 0.752 | 1.184 | 11.50  | 4.90  | 2  | 6   | 245  | 26.4  | 7.50  |
| Q6GQ51   | Calcium-binding mitochondrial carrier protein SCA3 OS=Mus musculus GN=Slc25a3 PE=2 SV=1 - [SCA3_MOUSE]                     | 33.19 | 6 | 13 | 16 | 68  | 0.692 | 1.749 | 1.320 | 1.184 | 187.78 | 33.19 | 28 | 68  | 467  | 52.5  | 7.59  |
| F6W6X9   | RNA pseudouridylylate synthase domain-containing protein 4 (Fragment) OS=Mus musculus GN=Rpusd4 PE=4 SV=1 - [F6W6X9_MOUSE] | 34.29 | 2 | 1  | 1  | 2   | 0.595 | 0.562 | 1.091 | 1.184 | 2.79   | 34.29 | 2  | 2   | 35   | 4.1   | 11.43 |
| E9Q641   | Nebulin-related-anchoring protein OS=Mus musculus GN=Nrap PE=2 SV=1 - [E9Q641_MOUSE]                                       | 1.21  | 4 | 1  | 2  | 3   | 5.294 | 2.124 | 1.090 | 1.184 | 2.57   | 1.21  | 2  | 3   | 1485 | 167.4 | 9.20  |
| Q8VCE6   | 5'(3')-deoxyribonucleotidase, mitochondrial OS=Mus musculus GN=Nt5m PE=2 SV=1 - [NT5M_MOUSE]                               | 40.00 | 1 | 5  | 6  | 14  | 0.884 | 1.082 | 1.014 | 1.184 | 56.34  | 40.00 | 8  | 14  | 220  | 25.6  | 8.35  |
| Q9D387   | Lysosome-associated membrane glycoprotein 5 OS=Mus musculus GN=Lamp5 PE=1 SV=2 - [LAMP5_MOUSE]                             | 10.71 | 1 | 3  | 3  | 9   | 1.483 | 0.680 | 1.666 | 1.184 | 24.90  | 10.71 | 6  | 9   | 280  | 31.7  | 6.14  |
| Q9D0L7   | Armadillo repeat-containing protein 10 OS=Mus musculus GN=Armc10 PE=1 SV=1 - [ARMC10_MOUSE]                                | 60.13 | 3 | 11 | 11 | 53  | 0.711 | 1.474 | 1.017 | 1.184 | 156.64 | 60.13 | 18 | 53  | 306  | 33.3  | 7.99  |
| Q64735-2 | Isoform 2 of Complement component receptor 1-like protein OS=Mus musculus GN=Cr1l - [CR1L_MOUSE]                           | 13.86 | 2 | 6  | 6  | 22  | 0.700 | 1.192 | 0.871 | 1.185 | 68.29  | 13.86 | 11 | 22  | 440  | 49.0  | 5.73  |
| Q8CIV8   | Tubulin-specific chaperone E OS=Mus musculus GN=Tdce PE=1 SV=1 - [TBCE_MOUSE]                                              | 21.56 | 3 | 9  | 10 | 29  | 1.029 | 1.422 | 1.047 | 1.185 | 80.81  | 21.56 | 17 | 29  | 524  | 59.0  | 6.29  |
| Q8BMQ8   | Vacuolar fusion protein MON1 homolog B OS=Mus musculus GN=Mon1b PE=2 SV=1 - [MON1B_MOUSE]                                  | 13.92 | 1 | 6  | 6  | 11  | 1.312 | 1.274 | 0.999 | 1.185 | 29.92  | 13.92 | 9  | 11  | 553  | 60.0  | 5.57  |
| Q8VDQ8-2 | Isoform 2 of NAD-dependent protein deacetylase sirtuin-2 OS=Mus musculus GN=Sirt2 - [SIRT2_MOUSE]                          | 68.18 | 3 | 22 | 22 | 236 | 1.095 | 0.259 | 0.971 | 1.185 | 690.26 | 68.18 | 38 | 236 | 352  | 39.5  | 7.02  |
| Q8R2U6   | Diphosphoinositol polyphosphate phosphohydrolase 2 OS=Mus musculus GN=Nudt4 PE=1 SV=1 - [NUDT4_MOUSE]                      | 31.28 | 1 | 3  | 4  | 12  | 1.101 | 0.633 | 1.516 | 1.185 | 31.83  | 31.28 | 6  | 12  | 179  | 20.1  | 6.35  |
| Q60714   | Long-chain fatty acid transport protein 1 OS=Mus musculus GN=Slc27a1 PE=1 SV=1 - [S27A1_MOUSE]                             | 34.37 | 1 | 14 | 15 | 66  | 0.948 | 1.121 | 1.079 | 1.185 | 184.13 | 34.37 | 26 | 66  | 646  | 71.2  | 8.38  |
| Q6SKR2   | HemK methyltransferase family member 2, isoform CRA_c OS=Mus musculus GN=N6amt1 PE=2 SV=1 - [Q6SKR2_MOUSE]                 | 19.63 | 2 | 3  | 3  | 11  | 0.759 | 1.130 | 0.950 | 1.185 | 28.25  | 19.63 | 6  | 11  | 214  | 23.0  | 5.62  |
| P22315   | Ferrochelatase, mitochondrial OS=Mus musculus GN=Fech PE=1 SV=2 - [HEMH_MOUSE]                                             | 49.05 | 2 | 18 | 18 | 60  | 0.891 | 1.144 | 1.095 | 1.185 | 158.21 | 49.05 | 29 | 60  | 420  | 47.1  | 8.91  |
| Q3TUF7-2 | Isoform 2 of YEATS domain-containing protein 2 OS=Mus musculus GN=Yeats2 - [YETS2_MOUSE]                                   | 0.92  | 3 | 1  | 1  | 1   | 0.919 | 1.144 | 1.168 | 1.185 | 2.80   | 0.92  | 1  | 1   | 1305 | 137.2 | 9.14  |
| Q9R0M6   | Ras-related protein Rab-9A OS=Mus musculus GN=Rab9a PE=1 SV=1 - [RAB9A_MOUSE]                                              | 55.22 | 3 | 7  | 9  | 32  | 0.881 | 1.040 | 0.941 | 1.185 | 94.37  | 55.22 | 15 | 32  | 201  | 22.9  | 5.66  |
| F7C846   | Metaxin-1 OS=Mus musculus GN=Mtx1 PE=2 SV=1 - [F7C846_MOUSE]                                                               | 19.09 | 9 | 9  | 9  | 47  | 0.594 | 1.191 | 1.096 | 1.185 | 147.94 | 19.09 | 17 | 47  | 461  | 51.3  | 9.60  |
| Q8BTX9   | Inactive hydroxysteroid dehydrogenase-like protein 1 OS=Mus musculus GN=Hsd1l PE=2 SV=1 - [HSDL1_MOUSE]                    | 42.42 | 1 | 12 | 13 | 40  | 0.847 | 1.129 | 0.905 | 1.186 | 121.39 | 42.42 | 22 | 40  | 330  | 36.8  | 8.48  |
| Q8BGD5   | Carnitine O-palmitoyltransferase 1, brain isoform OS=Mus musculus GN=Cpt1c PE=1 SV=1 - [CPT1C_MOUSE]                       | 19.80 | 1 | 12 | 12 | 29  | 0.545 | 1.248 | 1.128 | 1.186 | 79.21  | 19.80 | 22 | 29  | 798  | 90.0  | 7.49  |
| Q7TSY8   | Shugoshin-like 2 OS=Mus musculus GN=Sgol2 PE=1 SV=1 - [SGOL2_MOUSE]                                                        | 2.58  | 1 | 2  | 3  | 5   | 0.814 | 0.917 | 1.764 | 1.186 | 8.82   | 2.58  | 3  | 5   | 1164 | 130.2 | 8.76  |
| Q8C0T7   | Major facilitator superfamily domain-containing protein 9 OS=Mus musculus GN=Mfsd9 PE=2 SV=1 - [MFS9_MOUSE]                | 3.22  | 1 | 1  | 1  | 1   | 1.259 | 1.060 | 0.984 | 1.186 | 4.83   | 3.22  | 1  | 1   | 466  | 49.6  | 8.28  |

|          |                                                                                                                                    |       |    |    |    |     |       |       |       |       |        |       |    |     |      |       |      |
|----------|------------------------------------------------------------------------------------------------------------------------------------|-------|----|----|----|-----|-------|-------|-------|-------|--------|-------|----|-----|------|-------|------|
| Q9JLM9   | Growth factor receptor-bound protein 14 OS=Mus musculus GN=Grb14 PE=1 SV=1 - [GRB14_MOUSE]                                         | 15.61 | 3  | 6  | 6  | 11  | 1.107 | 0.763 | 1.151 | 1.186 | 34.75  | 15.61 | 10 | 11  | 538  | 60.5  | 8.44 |
| D3YXQ4   | Beta-chimaerin (Fragment) OS=Mus musculus GN=Chn2 PE=2 SV=1 - [D3YXQ4_MOUSE]                                                       | 11.65 | 1  | 1  | 1  | 1   | 8.135 | 1.301 | 1.571 | 1.186 | 1.94   | 11.65 | 1  | 1   | 103  | 11.8  | 8.91 |
| E9Q8N8   | Electrogenic sodium bicarbonate cotransporter 1 OS=Mus musculus GN=Slc4a4 PE=2 SV=1 - [E9Q8N8_MOUSE]                               | 28.52 | 6  | 4  | 28 | 170 | 0.833 | 0.512 | 0.860 | 1.186 | 453.50 | 28.52 | 49 | 170 | 1094 | 123.0 | 6.89 |
| Q8RSZ7   | Rho-related GTP-binding protein RhoQ OS=Mus musculus GN=Rhoq PE=1 SV=2 - [RHOQ_MOUSE]                                              | 12.20 | 7  | 1  | 2  | 8   | 0.799 | 0.642 | 0.602 | 1.186 | 26.34  | 12.20 | 4  | 8   | 205  | 22.6  | 6.32 |
| P34928   | Apolipoprotein C-I OS=Mus musculus GN=Apoc1 PE=2 SV=1 - [APOC1_MOUSE]                                                              | 10.23 | 1  | 1  | 1  | 2   | 2.160 | 3.386 | 0.492 | 1.186 | 7.64   | 10.23 | 2  | 2   | 88   | 9.7   | 9.09 |
| Q924D0   | Reticulon-4-interacting protein 1, mitochondrial OS=Mus musculus GN=Rtnip1 PE=1 SV=2 - [RT4I1_MOUSE]                               | 36.36 | 2  | 12 | 12 | 27  | 0.912 | 1.034 | 0.909 | 1.186 | 78.23  | 36.36 | 21 | 27  | 396  | 43.3  | 9.20 |
| Q80TM9   | Nischarin OS=Mus musculus GN=Nisch PE=1 SV=2 - [NISCH_MOUSE]                                                                       | 17.51 | 14 | 22 | 22 | 90  | 0.779 | 1.387 | 0.991 | 1.187 | 280.10 | 17.51 | 36 | 90  | 1593 | 174.9 | 5.16 |
| E9QP85   | Protein Dos OS=Mus musculus GN=Dos PE=4 SV=1 - [E9QP85_MOUSE]                                                                      | 25.93 | 3  | 12 | 12 | 62  | 1.068 | 1.276 | 1.191 | 1.187 | 180.31 | 25.93 | 22 | 62  | 698  | 74.1  | 6.33 |
| G5E889   | Mitochondrial translation optimization 1 homolog (S. cerevisiae), isoform CRA_b OS=Mus musculus GN=Mto1 PE=3 SV=1 - [G5E889_MOUSE] | 12.11 | 4  | 7  | 7  | 10  | 1.250 | 1.033 | 1.266 | 1.187 | 28.23  | 12.11 | 10 | 10  | 669  | 74.3  | 8.92 |
| E9Q968   | Pituitary adenylate cyclase-activating polypeptide type I receptor OS=Mus musculus GN=Adcyap1r1 PE=2 SV=1 - [E9Q968_MOUSE]         | 9.29  | 7  | 5  | 5  | 22  | 0.942 | 1.063 | 1.025 | 1.187 | 64.54  | 9.29  | 8  | 22  | 495  | 56.5  | 6.52 |
| P56399   | Ubiquitin carboxyl-terminal hydrolase 5 OS=Mus musculus GN=Usp5 PE=1 SV=1 - [LUBP5_MOUSE]                                          | 44.64 | 4  | 31 | 32 | 268 | 0.884 | 1.256 | 1.108 | 1.187 | 764.48 | 44.64 | 57 | 268 | 858  | 95.8  | 5.01 |
| Q80X80   | C2 domain-containing protein 2-like OS=Mus musculus GN=C2cd2l PE=1 SV=3 -                                                          | 44.05 | 1  | 19 | 19 | 133 | 0.881 | 1.495 | 1.687 | 1.187 | 427.86 | 44.05 | 34 | 133 | 706  | 76.3  | 7.21 |
| P97490   | Adenylate cyclase type 8 OS=Mus musculus GN=Adcy8 PE=2 SV=2 - [ADCY8_MOUSE]                                                        | 12.01 | 1  | 13 | 13 | 32  | 0.653 | 1.042 | 0.949 | 1.187 | 76.51  | 12.01 | 23 | 32  | 1249 | 140.0 | 6.93 |
| P56388   | Cocaine- and amphetamine-regulated transcript protein OS=Mus musculus GN=Cartpt PE=2 SV=2 - [CART_MOUSE]                           | 58.14 | 1  | 2  | 7  | 20  | 1.281 | 0.917 | 0.820 | 1.187 | 59.96  | 58.14 | 13 | 20  | 129  | 14.3  | 8.87 |
| Q8VDH1-2 | Isoform 2 of F-box only protein 21 OS=Mus musculus GN=Fbxo21 - [FBX21_MOUSE]                                                       | 12.90 | 2  | 5  | 5  | 19  | 1.660 | 1.220 | 1.094 | 1.187 | 69.37  | 12.90 | 8  | 19  | 620  | 71.3  | 5.99 |
| Q3UHG7   | Protein LCHN OS=Mus musculus GN=Lchn PE=2 SV=1 - [LCHN_MOUSE]                                                                      | 14.29 | 2  | 6  | 6  | 16  | 0.973 | 0.789 | 1.140 | 1.187 | 37.62  | 14.29 | 9  | 16  | 455  | 51.4  | 5.25 |
| O35985   | Submaxillary gland androgen-regulated protein 2, isoform gamma OS=Mus musculus GN=Smr2 PE=2 SV=1 - [SMR2C_MOUSE]                   | 15.38 | 1  | 1  | 1  | 3   | 1.319 | 1.828 | 1.173 | 1.188 | 0.00   | 15.38 | 1  | 3   | 143  | 16.1  | 7.40 |
| Q9ESN4   | Complement C1q-like protein 3 OS=Mus musculus GN=C1ql3 PE=1 SV=1 - [C1QL3_MOUSE]                                                   | 28.24 | 2  | 3  | 4  | 11  | 1.238 | 1.583 | 1.848 | 1.188 | 26.08  | 28.24 | 8  | 11  | 255  | 26.7  | 6.79 |
| P24472   | Glutathione S-transferase A4 OS=Mus musculus GN=Gsta4 PE=1 SV=3 - [GSTA4_MOUSE]                                                    | 59.91 | 3  | 10 | 13 | 85  | 1.488 | 1.493 | 0.851 | 1.188 | 211.74 | 59.91 | 23 | 85  | 222  | 25.5  | 7.39 |
| D3YUM1   | NADH dehydrogenase [ubiquinone] flavoprotein 1, mitochondrial OS=Mus musculus GN=Ndufv1 PE=2 SV=1 - [NDUFB1_MOUSE]                 | 67.25 | 6  | 26 | 26 | 166 | 0.772 | 0.879 | 1.070 | 1.188 | 430.86 | 67.25 | 47 | 166 | 455  | 49.9  | 8.07 |
| F8WIV2   | Serpin B6 OS=Mus musculus GN=Serpib6a PE=2 SV=1 - [F8WIV2_MOUSE]                                                                   | 50.38 | 11 | 16 | 17 | 71  | 0.759 | 1.574 | 1.097 | 1.188 | 206.56 | 50.38 | 27 | 71  | 399  | 44.7  | 6.38 |
| Q8VBY2   | Calcium/calmodulin-dependent protein kinase kinase 1 OS=Mus musculus GN=Camkk1 PE=1 SV=1 - [CAMKK1_MOUSE]                          | 32.08 | 2  | 15 | 15 | 34  | 1.009 | 1.027 | 1.254 | 1.188 | 105.77 | 32.08 | 25 | 34  | 505  | 55.8  | 5.99 |
| Q6P9J5   | KN motif and ankyrin repeat domain-containing protein 4 OS=Mus musculus GN=Kank4 PE=2 SV=1 - [KANK4_MOUSE]                         | 13.48 | 1  | 9  | 9  | 36  | 2.119 | 0.410 | 1.281 | 1.188 | 72.41  | 13.48 | 13 | 36  | 1016 | 110.3 | 4.88 |

|        |                                                                                                                                     |       |    |    |    |      |       |        |       |       |         |       |    |      |      |       |      |
|--------|-------------------------------------------------------------------------------------------------------------------------------------|-------|----|----|----|------|-------|--------|-------|-------|---------|-------|----|------|------|-------|------|
| Q9Z1A9 | TBC1 domain family member 8 OS=Mus musculus GN=Tbc1d8 PE=2 SV=2 -                                                                   | 3.97  | 1  | 4  | 4  | 8    | 0.991 | 1.557  | 1.503 | 1.188 | 24.44   | 3.97  | 6  | 8    | 1134 | 130.0 | 5.48 |
| Q8BHF7 | CDP-diacylglycerol--glycerol-3-phosphate 3-phosphatidyltransferase, mitochondrial OS=Mus musculus GN=Pgs1 PE=2 SV=1 - [PGPS1_MOUSE] | 27.12 | 3  | 11 | 11 | 35   | 0.815 | 1.055  | 0.964 | 1.188 | 128.69  | 27.12 | 20 | 35   | 553  | 62.4  | 8.90 |
| O88842 | FYVE, RhoGEF and PH domain-containing protein 3 OS=Mus musculus GN=Fgd3 PE=2 SV=1 - [FGD3_MOUSE]                                    | 6.28  | 3  | 2  | 2  | 4    | 1.641 | 1.096  | 1.024 | 1.188 | 16.92   | 6.28  | 3  | 4    | 733  | 80.6  | 5.76 |
| Q8VEK0 | Cell cycle control protein 50A OS=Mus musculus GN=Tmem30a PE=1 SV=1 - [CC50A_MOUSE]                                                 | 26.37 | 3  | 11 | 11 | 78   | 1.393 | 1.282  | 1.159 | 1.188 | 183.63  | 26.37 | 18 | 78   | 364  | 41.0  | 8.37 |
| Q8C726 | BTB/POZ domain-containing protein 9 OS=Mus musculus GN=Btd9 PE=2 SV=1 -                                                             | 4.08  | 1  | 1  | 2  | 3    | 1.933 | 1.312  | 1.235 | 1.189 | 11.70   | 4.08  | 3  | 3    | 612  | 69.1  | 5.68 |
| Q922F4 | Tubulin beta-6 chain OS=Mus musculus GN=Tubb6 PE=1 SV=1 - [TBB6_MOUSE]                                                              | 60.40 | 1  | 9  | 23 | 2054 | 0.978 | 1.333  | 0.909 | 1.189 | 5436.67 | 60.40 | 40 | 2054 | 447  | 50.1  | 4.89 |
| Q9D0L4 | Uncharacterized aarf domain-containing protein kinase 1 OS=Mus musculus GN=Adck1 PE=2 SV=1 - [ADCK1_MOUSE]                          | 26.29 | 2  | 12 | 12 | 40   | 0.694 | 1.052  | 0.964 | 1.189 | 120.29  | 26.29 | 20 | 40   | 525  | 59.7  | 8.05 |
| Q9DCM2 | Glutathione S-transferase kappa 1 OS=Mus musculus GN=Gstk1 PE=1 SV=3 - [GSTK1_MOUSE]                                                | 64.60 | 1  | 12 | 13 | 43   | 1.003 | 1.335  | 1.014 | 1.189 | 133.89  | 64.60 | 20 | 43   | 226  | 25.7  | 8.88 |
| B7ZMP1 | Probable Xaa-Pro aminopeptidase 3 OS=Mus musculus GN=Xpnpep3 PE=2 SV=1 -                                                            | 25.49 | 2  | 3  | 8  | 23   | 1.022 | 1.282  | 0.955 | 1.189 | 78.38   | 25.49 | 15 | 23   | 506  | 56.6  | 7.68 |
| Q3UGP9 | Leucine-rich repeat-containing protein 58 OS=Mus musculus GN=Lrc58 PE=2 SV=1 - [LRCS8_MOUSE]                                        | 4.10  | 1  | 1  | 1  | 4    | 0.655 | 1.271  | 1.002 | 1.189 | 9.65    | 4.10  | 2  | 4    | 366  | 40.1  | 6.62 |
| O88653 | Regulator complex protein LAMTOR3 OS=Mus musculus GN=Lamtor3 PE=1 SV=1 - [LTOR3_MOUSE]                                              | 21.77 | 1  | 3  | 3  | 8    | 1.574 | 1.238  | 0.965 | 1.189 | 24.29   | 21.77 | 6  | 8    | 124  | 13.5  | 7.34 |
| P11214 | Tissue-type plasminogen activator OS=Mus musculus GN=Plat PE=1 SV=3 - [TPA_MOUSE]                                                   | 9.30  | 1  | 5  | 5  | 12   | 1.101 | 1.042  | 0.830 | 1.189 | 38.22   | 9.30  | 10 | 12   | 559  | 63.1  | 8.15 |
| B7ZBW1 | Potassium voltage-gated channel subfamily KQT member 2 OS=Mus musculus GN=Kcnq2 PE=2 SV=1 - [B7ZBW1_MOUSE]                          | 32.86 | 28 | 25 | 25 | 121  | 0.788 | 1.080  | 1.249 | 1.189 | 364.23  | 32.86 | 42 | 121  | 852  | 93.9  | 9.28 |
| Q69ZB3 | Testis-specific Y-encoded-like protein 5 OS=Mus musculus GN=Tspy5 PE=2 SV=2 - [TSYL5_MOUSE]                                         | 7.88  | 1  | 2  | 2  | 3    | 3.182 | 2.822  | 1.441 | 1.189 | 1.81    | 7.88  | 2  | 3    | 406  | 44.3  | 9.77 |
| O09111 | NADH dehydrogenase [ubiquinone] 1 beta subcomplex subunit 11, mitochondrial OS=Mus musculus GN=Ndufb11 PE=1 SV=2 - [NDUBB_MOUSE]    | 30.46 | 1  | 3  | 3  | 55   | 0.937 | 1.037  | 1.108 | 1.189 | 172.51  | 30.46 | 6  | 55   | 151  | 17.4  | 5.22 |
| Q91W96 | Anaphase-promoting complex subunit 4 OS=Mus musculus GN=Anapc4 PE=2 SV=1 - [APC4_MOUSE]                                             | 10.90 | 2  | 7  | 7  | 14   | 0.903 | 1.122  | 0.963 | 1.190 | 51.16   | 10.90 | 11 | 14   | 807  | 91.6  | 5.40 |
| D3YTU2 | 2-oxoglutarate and iron-dependent oxygenase domain-containing protein 1 OS=Mus musculus GN=Ogfod1 PE=2 SV=1 - [D3YTU2_MOUSE]        | 38.49 | 4  | 19 | 19 | 38   | 1.046 | 1.004  | 0.836 | 1.190 | 116.62  | 38.49 | 27 | 38   | 530  | 61.1  | 4.87 |
| P43432 | Interleukin-12 subunit beta OS=Mus musculus GN=Il12b PE=1 SV=1 - [IL12B_MOUSE]                                                      | 3.28  | 1  | 1  | 1  | 1    | 0.606 | 0.519  | 1.133 | 1.190 | 2.79    | 3.28  | 1  | 1    | 335  | 38.2  | 6.54 |
| Q8BGF9 | Solute carrier family 25 member 44 OS=Mus musculus GN=Slc25a44 PE=2 SV=1 -                                                          | 6.37  | 3  | 2  | 2  | 4    | 0.767 | 1.270  | 1.179 | 1.190 | 10.00   | 6.37  | 3  | 4    | 314  | 35.3  | 9.66 |
| P04247 | Myoglobin OS=Mus musculus GN=Mb PE=1 SV=3 - [MYG_MOUSE]                                                                             | 36.36 | 1  | 4  | 4  | 19   | 6.019 | 11.650 | 0.537 | 1.190 | 64.96   | 36.36 | 7  | 19   | 154  | 17.1  | 7.62 |
| P28028 | Serine/threonine-protein kinase B-raf OS=Mus musculus GN=Braf PE=1 SV=3 - [BRAF_MOUSE]                                              | 37.94 | 2  | 5  | 26 | 80   | 1.157 | 0.861  | 1.099 | 1.190 | 231.21  | 37.94 | 46 | 80   | 804  | 88.7  | 7.65 |
| Q9CQB4 | Cytochrome b-c1 complex subunit 7 OS=Mus musculus GN=Uqcrb PE=3 SV=1 - [Q9CQB4_MOUSE]                                               | 54.95 | 2  | 10 | 10 | 140  | 1.304 | 1.050  | 1.448 | 1.190 | 354.75  | 54.95 | 19 | 140  | 111  | 13.6  | 9.11 |
| Q925N0 | Sideroflexin-5 OS=Mus musculus GN=Sfxn5 PE=1 SV=2 - [SFXN5_MOUSE]                                                                   | 35.38 | 3  | 11 | 11 | 71   | 0.578 | 0.682  | 0.880 | 1.191 | 176.98  | 35.38 | 19 | 71   | 342  | 37.3  | 9.44 |

|          |                                                                                                                              |       |   |    |    |     |       |       |       |       |        |       |    |     |      |       |      |
|----------|------------------------------------------------------------------------------------------------------------------------------|-------|---|----|----|-----|-------|-------|-------|-------|--------|-------|----|-----|------|-------|------|
| O70443   | Guanine nucleotide-binding protein G(z) subunit alpha OS=Mus musculus GN=Gnaz PE=2 SV=4 - [GNAZ_MOUSE]                       | 48.17 | 2 | 13 | 16 | 147 | 0.615 | 1.248 | 1.178 | 1.191 | 451.91 | 48.17 | 28 | 147 | 355  | 40.8  | 7.61 |
| E9QLB8   | Uncharacterized aarF domain-containing protein kinase 4 OS=Mus musculus GN=Adck4 PE=4 SV=1 - [E9QLB8_MOUSE]                  | 11.07 | 2 | 4  | 4  | 11  | 1.361 | 0.881 | 0.915 | 1.191 | 43.17  | 11.07 | 7  | 11  | 533  | 59.1  | 7.75 |
| P28184   | Metallothionein-3 OS=Mus musculus GN=Mt3 PE=1 SV=1 - [MT3_MOUSE]                                                             | 33.82 | 1 | 2  | 2  | 4   | 0.941 | 0.960 | 2.292 | 1.191 | 8.73   | 33.82 | 4  | 4   | 68   | 7.0   | 7.47 |
| Q8BR99   | Calcium/calmodulin-dependent 3',5'-cyclic nucleotide phosphodiesterase 1A OS=Mus musculus GN=Med13 PE=1 SV=1 - [MED13_MOUSE] | 35.05 | 7 | 12 | 13 | 65  | 0.881 | 2.185 | 1.407 | 1.191 | 236.94 | 35.05 | 23 | 65  | 545  | 62.3  | 5.91 |
| Q80ZJ1   | Ras-related protein Rap-2a OS=Mus musculus GN=Rap2a PE=1 SV=2 - [RAP2A_MOUSE]                                                | 67.76 | 3 | 2  | 9  | 61  | 0.644 | 1.100 | 0.929 | 1.191 | 214.38 | 67.76 | 18 | 61  | 183  | 20.6  | 4.82 |
| Q3URE1   | Acyl-CoA synthetase family member 3, mitochondrial OS=Mus musculus GN=Acsf3 PE=2 SV=2 - [ACSF3_MOUSE]                        | 32.76 | 2 | 16 | 16 | 54  | 1.003 | 0.927 | 0.986 | 1.191 | 144.45 | 32.76 | 28 | 54  | 583  | 65.0  | 8.02 |
| Q80UW5   | Serine/threonine-protein kinase MRCK gamma OS=Mus musculus GN=Cdc42bpg PE=2 SV=2 - [MRCKG_MOUSE]                             | 4.26  | 1 | 3  | 6  | 11  | 1.372 | 0.904 | 1.232 | 1.191 | 33.51  | 4.26  | 8  | 11  | 1551 | 172.0 | 6.05 |
| AZAI8-2  | Isoform 2 of 1-aminocyclopropane-1-carboxylate synthase-like protein 1 OS=Mus musculus GN=Acsc - [ACSC_MOUSE]                | 9.39  | 3 | 3  | 3  | 12  | 0.890 | 0.977 | 0.792 | 1.191 | 18.08  | 9.39  | 6  | 12  | 479  | 54.5  | 6.33 |
| P62743   | AP-2 complex subunit sigma OS=Mus musculus GN=Ap2s1 PE=1 SV=1 - [AP2S1_MOUSE]                                                | 42.96 | 1 | 6  | 6  | 86  | 0.699 | 1.404 | 1.131 | 1.191 | 256.95 | 42.96 | 10 | 86  | 142  | 17.0  | 6.18 |
| Q9R0X0   | Mediator of RNA polymerase II transcription subunit 20 OS=Mus musculus GN=Med20 PE=1 SV=1 - [MED20_MOUSE]                    | 10.38 | 4 | 2  | 2  | 2   | 1.160 | 1.009 | 0.966 | 1.191 | 6.53   | 10.38 | 2  | 2   | 212  | 23.2  | 6.87 |
| Q9CR68   | Cytochrome b-c1 complex subunit Rieske, mitochondrial OS=Mus musculus GN=Uqcrls1 PE=1 SV=1 - [UQCRLS1_MOUSE]                 | 48.91 | 1 | 12 | 12 | 149 | 0.967 | 0.897 | 1.278 | 1.191 | 419.85 | 48.91 | 20 | 149 | 274  | 29.3  | 8.70 |
| Q9ES97-3 | Isoform 3 of Reticulon-3 OS=Mus musculus GN=Rtn3 - [RTN3_MOUSE]                                                              | 21.10 | 2 | 1  | 6  | 41  | 0.716 | 0.443 | 0.966 | 1.191 | 124.47 | 21.10 | 11 | 41  | 237  | 25.4  | 8.50 |
| Q91VN1   | Zinc finger protein 24 OS=Mus musculus GN=Znf24 PE=1 SV=1 - [ZNF24_MOUSE]                                                    | 9.51  | 1 | 2  | 2  | 5   | 0.481 | 0.720 | 1.216 | 1.191 | 5.69   | 9.51  | 3  | 5   | 368  | 41.9  | 6.04 |
| Q7TMC8   | L-fucose kinase OS=Mus musculus GN=Fuk PE=2 SV=1 - [Q7TMC8_MOUSE]                                                            | 14.95 | 1 | 14 | 14 | 37  | 0.894 | 1.311 | 1.211 | 1.191 | 105.59 | 14.95 | 24 | 37  | 1090 | 119.2 | 6.60 |
| Q8K1R3   | Polyribonucleotide nucleobdyltransferase 1, mitochondrial OS=Mus musculus GN=Pnpt1 PE=1 SV=1 - [PNPT1_MOUSE]                 | 20.05 | 2 | 13 | 15 | 37  | 1.032 | 1.067 | 1.042 | 1.192 | 96.34  | 20.05 | 22 | 37  | 783  | 85.6  | 8.03 |
| Q91WA3   | Histone deacetylase 11 OS=Mus musculus GN=Hdac11 PE=2 SV=1 - [HDA11_MOUSE]                                                   | 36.89 | 3 | 11 | 12 | 60  | 0.854 | 0.883 | 0.965 | 1.192 | 187.85 | 36.89 | 22 | 60  | 347  | 39.1  | 7.14 |
| Q9CYK2   | Glutaminyl-peptide cyclotransferase OS=Mus musculus GN=Qpct PE=1 SV=2 - [QPCT_MOUSE]                                         | 9.39  | 2 | 3  | 3  | 9   | 0.890 | 0.899 | 0.517 | 1.192 | 28.96  | 9.39  | 5  | 9   | 362  | 41.1  | 6.92 |
| Q9EQM6   | Microprocessor complex subunit DGCR8 OS=Mus musculus GN=Dgcr8 PE=2 SV=2 - [DGCR8_MOUSE]                                      | 1.81  | 1 | 1  | 1  | 1   | 1.218 | 0.743 | 0.774 | 1.192 | 0.00   | 1.81  | 1  | 1   | 773  | 86.3  | 6.06 |
| Q6PER3   | Microtubule-associated protein RP/EB family member 3 OS=Mus musculus GN=Mapre3 PE=1 SV=1 - [MAPRE3_MOUSE]                    | 41.99 | 2 | 3  | 15 | 128 | 1.191 | 0.884 | 1.165 | 1.192 | 328.14 | 41.99 | 28 | 128 | 281  | 31.9  | 5.54 |
| Q69ZS6   | Synaptic vesicle glycoprotein 2C OS=Mus musculus GN=Svgc PE=1 SV=2 - [SV2C_MOUSE]                                            | 12.65 | 1 | 8  | 9  | 42  | 1.460 | 0.686 | 1.521 | 1.192 | 118.94 | 12.65 | 14 | 42  | 727  | 82.2  | 5.11 |
| F7B8J4   | Probable carboxypeptidase PM20D1 (Fragment) OS=Mus musculus GN=Pm20d1 PE=4 SV=1 - [F7B8J4_MOUSE]                             | 31.31 | 2 | 2  | 2  | 5   | 0.801 | 1.462 | 0.957 | 1.192 | 15.87  | 31.31 | 3  | 5   | 99   | 11.4  | 5.67 |
| Q1JQR8   | Glucagon-like peptide 1 receptor OS=Mus musculus GN=Glp1r PE=2 SV=1 - [Q1JQR8_MOUSE]                                         | 1.73  | 2 | 1  | 1  | 2   | 0.703 | 0.898 | 0.863 | 1.192 | 6.68   | 1.73  | 2  | 2   | 463  | 53.0  | 8.44 |
| Q3U1D9   | UPF0602 protein C4orf47 homolog OS=Mus musculus PE=2 SV=1 - [CD047_MOUSE]                                                    | 5.70  | 1 | 1  | 1  | 2   | 2.041 | 1.266 | 0.979 | 1.192 | 0.00   | 5.70  | 1  | 2   | 316  | 35.2  | 9.73 |

|          |                                                                                                                                   |       |   |    |    |      |       |       |       |       |         |       |    |      |      |       |      |
|----------|-----------------------------------------------------------------------------------------------------------------------------------|-------|---|----|----|------|-------|-------|-------|-------|---------|-------|----|------|------|-------|------|
| Q6VNB8   | WD repeat and FYVE domain-containing protein 3 OS=Mus musculus GN=Wdfy3 PE=1 SV=1 - [WDFY3_MOUSE]                                 | 12.29 | 6 | 37 | 39 | 125  | 0.863 | 1.012 | 1.092 | 1.192 | 359.70  | 12.29 | 69 | 125  | 3508 | 392.1 | 6.80 |
| F6W8W7   | Protein Taf4a (Fragment) OS=Mus musculus GN=Taf4a PE=4 SV=1 - [F6W8W7_MOUSE]                                                      | 5.00  | 2 | 3  | 3  | 9    | 2.069 | 1.291 | 1.365 | 1.192 | 17.76   | 5.00  | 4  | 9    | 680  | 73.2  | 9.94 |
| F8VQK3   | Protein Gucy1a2 OS=Mus musculus GN=Gucy1a2 PE=2 SV=1 - [F8VQK3_MOUSE]                                                             | 40.41 | 1 | 22 | 22 | 65   | 0.547 | 0.935 | 1.239 | 1.193 | 208.49  | 40.41 | 37 | 65   | 730  | 81.8  | 6.87 |
| P81122   | Insulin receptor substrate 2 OS=Mus musculus GN=Irs2 PE=1 SV=2 - [IRS2_MOUSE]                                                     | 26.12 | 1 | 22 | 22 | 63   | 1.229 | 1.140 | 1.176 | 1.193 | 175.64  | 26.12 | 32 | 63   | 1321 | 136.7 | 8.69 |
| Q9CZ04   | COP9 signalosome complex subunit 7a OS=Mus musculus GN=Cops7a PE=1 SV=2 - [COPS7_MOUSE]                                           | 40.73 | 5 | 10 | 10 | 24   | 1.012 | 0.735 | 1.142 | 1.193 | 65.51   | 40.73 | 18 | 24   | 275  | 30.2  | 7.87 |
| P97930   | Thymidylate kinase OS=Mus musculus GN=Dtymk PE=2 SV=2 - [KTHY_MOUSE]                                                              | 33.96 | 3 | 8  | 9  | 20   | 0.986 | 1.349 | 1.038 | 1.193 | 51.98   | 33.96 | 17 | 20   | 212  | 23.9  | 7.90 |
| Q99LC3   | NADH dehydrogenase [ubiquinone] 1 alpha subcomplex subunit 10, mitochondrial OS=Mus musculus GN=Ndufa10 PE=1 SV=1 - [NDUAA_MOUSE] | 66.48 | 1 | 20 | 20 | 127  | 0.717 | 0.903 | 1.054 | 1.193 | 412.39  | 66.48 | 32 | 127  | 355  | 40.6  | 7.78 |
| Q9CPW9-2 | Isoform 2 of Methionine aminopeptidase 1D, mitochondrial OS=Mus musculus GN=Metap1d - [MAP12_MOUSE]                               | 10.14 | 2 | 2  | 2  | 3    | 1.867 | 1.806 | 0.555 | 1.193 | 8.69    | 10.14 | 3  | 3    | 217  | 24.0  | 5.26 |
| Q3ULJ0-2 | Isoform 2 of Glycerol-3-phosphate dehydrogenase 1-like protein OS=Mus musculus GN=Gpd1l - [GPD1L_MOUSE]                           | 64.38 | 3 | 20 | 22 | 134  | 0.497 | 1.671 | 1.198 | 1.193 | 361.87  | 64.38 | 39 | 134  | 320  | 34.6  | 6.87 |
| Q8BZG5-2 | Isoform 2 of Protein RRNAD1 OS=Mus musculus GN=Rrad1 - [RRNAD_MOUSE]                                                              | 11.29 | 4 | 1  | 2  | 2    | 2.078 | 0.931 | 1.165 | 1.193 | 0.00    | 11.29 | 2  | 2    | 310  | 34.3  | 8.65 |
| P31938   | Dual specificity mitogen-activated protein kinase kinase 1 OS=Mus musculus GN=Map2k1 PE=1 SV=2 - [MAP2K1_MOUSE]                   | 67.43 | 1 | 13 | 21 | 127  | 0.551 | 2.034 | 1.249 | 1.193 | 333.66  | 67.43 | 36 | 127  | 393  | 43.4  | 6.70 |
| P05063   | Fructose-bisphosphate aldolase C OS=Mus musculus GN=Aldoc PE=1 SV=4 - [ALDOC_MOUSE]                                               | 81.54 | 1 | 24 | 32 | 1090 | 1.408 | 0.731 | 1.011 | 1.193 | 2812.67 | 81.54 | 59 | 1090 | 363  | 39.4  | 7.12 |
| Q6NVF0   | Inositol polyphosphate 5-phosphatase OCRL-1 OS=Mus musculus GN=Ocr1 PE=2 SV=1 - [OCRL_MOUSE]                                      | 29.44 | 4 | 24 | 24 | 82   | 0.740 | 1.168 | 1.016 | 1.193 | 210.66  | 29.44 | 36 | 82   | 900  | 104.2 | 6.27 |
| Q80TC6   | Zinc finger SWIM domain-containing protein 5 OS=Mus musculus GN=Zswim5 PE=2 SV=2 - [ZSWM5_MOUSE]                                  | 1.60  | 1 | 1  | 2  | 2    | 1.287 | 1.853 | 1.362 | 1.193 | 5.52    | 1.60  | 2  | 2    | 1188 | 130.8 | 7.39 |
| Q8BH82   | N-acyl-phosphatidylethanolamine-hydrolyzing phospholipase D OS=Mus musculus GN=Napepld PE=1 SV=1 - [NAPEPLD_MOUSE]                | 19.95 | 1 | 7  | 7  | 12   | 1.491 | 1.206 | 1.060 | 1.194 | 36.86   | 19.95 | 11 | 12   | 396  | 45.8  | 5.94 |
| Q9JHR9-2 | Isoform 2 of Nuclear receptor-interacting protein 2 OS=Mus musculus GN=Nrip2 - [NRIP2_MOUSE]                                      | 34.93 | 4 | 7  | 7  | 32   | 1.340 | 0.696 | 0.948 | 1.194 | 91.21   | 34.93 | 14 | 32   | 229  | 25.3  | 7.34 |
| G3X925   | Pyruvate kinase OS=Mus musculus GN=Pfkf PE=3 SV=1 - [G3X925_MOUSE]                                                                | 23.17 | 4 | 6  | 9  | 69   | 1.441 | 1.522 | 1.372 | 1.194 | 158.76  | 23.17 | 16 | 69   | 574  | 62.2  | 7.09 |
| Q1HKZ5   | Mitogen-activated protein kinase kinase 13 OS=Mus musculus GN=Map3k13 PE=2 SV=1 - [M3K13_MOUSE]                                   | 4.90  | 1 | 2  | 4  | 13   | 0.891 | 0.726 | 1.588 | 1.194 | 40.13   | 4.90  | 7  | 13   | 959  | 106.9 | 6.74 |
| Q9DCM0   | Persulfide dioxygenase ETHE1, mitochondrial OS=Mus musculus GN=Eth1 PE=1 SV=2 - [ETHE1_MOUSE]                                     | 63.78 | 1 | 11 | 11 | 62   | 1.218 | 0.969 | 0.902 | 1.194 | 188.11  | 63.78 | 20 | 62   | 254  | 27.7  | 7.23 |
| Q92110   | ORM1-like protein 1 OS=Mus musculus GN=Ormdl1 PE=2 SV=1 - [ORML1_MOUSE]                                                           | 7.19  | 1 | 1  | 1  | 1    | 1.948 | 1.169 | 0.987 | 1.194 | 0.00    | 7.19  | 1  | 1    | 153  | 17.3  | 9.54 |
| Q9WUB0   | RanBP-type and C3HC4-type zinc finger-containing protein 1 OS=Mus musculus GN=Rbck1 PE=1 SV=2 - [HOIL1_MOUSE]                     | 32.87 | 2 | 16 | 16 | 47   | 1.590 | 1.276 | 1.058 | 1.195 | 149.40  | 32.87 | 27 | 47   | 508  | 57.5  | 6.19 |
| Q8BG67   | Protein EFR3 homolog A OS=Mus musculus GN=Efr3a PE=1 SV=1 - [EFR3A_MOUSE]                                                         | 23.93 | 3 | 15 | 17 | 55   | 0.680 | 1.091 | 0.987 | 1.195 | 166.96  | 23.93 | 29 | 55   | 819  | 92.6  | 6.83 |
| B1ASN7   | EF-hand calcium-binding domain-containing protein 3 (Fragment) OS=Mus musculus GN=Efcab3 PE=2 SV=2 - [EFCAB3_MOUSE]               | 3.06  | 1 | 1  | 1  | 1    | 4.224 | 1.943 | 1.378 | 1.195 | 2.27    | 3.06  | 1  | 1    | 359  | 40.8  | 9.00 |

|          |                                                                                                                        |       |   |    |    |     |       |       |       |       |         |       |    |     |      |       |       |
|----------|------------------------------------------------------------------------------------------------------------------------|-------|---|----|----|-----|-------|-------|-------|-------|---------|-------|----|-----|------|-------|-------|
| J3QP99   | FTS and Hook-interacting protein OS=Mus musculus GN=Fam160a2 PE=4 SV=1 - [J3QP99_MOUSE]                                | 22.75 | 3 | 1  | 16 | 40  | 2.118 | 1.369 | 1.087 | 1.195 | 119.01  | 22.75 | 25 | 40  | 989  | 108.0 | 6.76  |
| Q9CPV4   | Glyoxalase domain-containing protein 4 OS=Mus musculus GN=Glod4 PE=2 SV=1 - [GLOD4_MOUSE]                              | 80.87 | 8 | 19 | 19 | 127 | 1.081 | 1.116 | 1.039 | 1.195 | 389.11  | 80.87 | 37 | 127 | 298  | 33.3  | 5.47  |
| Q9DBL1   | Short/branched chain specific acyl-CoA dehydrogenase, mitochondrial OS=Mus musculus GN=Acadsb PE=1 SV=1                | 41.90 | 2 | 15 | 15 | 65  | 0.796 | 1.135 | 0.871 | 1.195 | 207.49  | 41.90 | 27 | 65  | 432  | 47.8  | 7.87  |
| Q91VC9   | Growth hormone-inducible transmembrane protein OS=Mus musculus GN=Ghtm PE=2 SV=1 - [GHITM_MOUSE]                       | 6.36  | 1 | 2  | 2  | 8   | 1.307 | 1.537 | 1.633 | 1.195 | 20.34   | 6.36  | 4  | 8   | 346  | 37.3  | 9.80  |
| A2ARM1   | Protein PAT1 homolog 2 OS=Mus musculus GN=Pat12 PE=2 SV=1 - [PATL2_MOUSE]                                              | 3.02  | 1 | 1  | 1  | 1   | 2.055 | 0.992 | 0.898 | 1.195 | 0.00    | 3.02  | 1  | 1   | 529  | 59.6  | 7.42  |
| Q91ZP9   | N-terminal EF-hand calcium-binding protein 2 OS=Mus musculus GN=Necab2 PE=1 SV=1 - [NECA2_MOUSE]                       | 60.67 | 3 | 19 | 19 | 95  | 0.807 | 1.686 | 1.390 | 1.196 | 297.97  | 60.67 | 35 | 95  | 389  | 43.4  | 5.30  |
| G3UZG5   | Kelch domain-containing protein 4 OS=Mus musculus GN=Kihdc4 PE=2 SV=1 -                                                | 2.09  | 3 | 1  | 1  | 1   | 1.172 | 0.951 | 1.045 | 1.196 | 2.06    | 2.09  | 1  | 1   | 527  | 58.5  | 5.81  |
| B1AWN4   | Protein Atp10b OS=Mus musculus GN=Atp10b PE=4 SV=1 - [B1AWN4_MOUSE]                                                    | 0.81  | 1 | 1  | 1  | 2   | 1.219 | 1.682 | 1.094 | 1.196 | 4.63    | 0.81  | 1  | 2   | 1474 | 166.3 | 6.60  |
| Q2TA57   | Aspartate beta-hydroxylase domain-containing protein 1 OS=Mus musculus GN=Asphd1 PE=2 SV=2 - [ASPHD1_MOUSE]            | 10.56 | 1 | 3  | 3  | 3   | 1.603 | 1.260 | 1.450 | 1.196 | 7.51    | 10.56 | 3  | 3   | 360  | 38.2  | 8.25  |
| D3Z1M4   | Calcium-binding protein 1 OS=Mus musculus GN=Cabp1 PE=2 SV=1 - [D3Z1M4_MOUSE]                                          | 15.71 | 4 | 5  | 6  | 20  | 2.035 | 0.846 | 1.915 | 1.196 | 50.89   | 15.71 | 11 | 20  | 350  | 37.9  | 8.28  |
| G3X9A8   | Ankyrin repeat domain 13 family, member D, isoform CRA_a OS=Mus musculus GN=Ankr13d PE=4 SV=1 - [G3X9A8_MOUSE]         | 10.08 | 5 | 5  | 5  | 11  | 0.742 | 1.010 | 0.931 | 1.196 | 33.87   | 10.08 | 8  | 11  | 605  | 68.0  | 5.47  |
| P10107   | Annexin A1 OS=Mus musculus GN=Anxa1 PE=1 SV=2 - [ANXA1_MOUSE]                                                          | 52.89 | 1 | 13 | 15 | 51  | 0.888 | 3.290 | 0.566 | 1.196 | 149.03  | 52.89 | 26 | 51  | 346  | 38.7  | 7.37  |
| Q8CA95-3 | Isoform 3 of cAMP and cAMP-inhibited cGMP 3',5'-cyclic phosphodiesterase 10A OS=Mus musculus GN=Pde10a - [PDE10_MOUSE] | 30.53 | 7 | 21 | 21 | 81  | 0.415 | 0.432 | 2.673 | 1.196 | 270.72  | 30.53 | 37 | 81  | 796  | 90.3  | 6.65  |
| P18872-2 | Isoform Alpha-2 of Guanine nucleotide-binding protein G(o) subunit alpha OS=Mus musculus GN=Gnap1 - [GNAO1_MOUSE]      | 64.97 | 5 | 3  | 23 | 492 | 0.397 | 0.548 | 1.070 | 1.196 | 1295.84 | 64.97 | 44 | 492 | 354  | 40.0  | 6.01  |
| Q8BVL3   | Sorting nexin-17 OS=Mus musculus GN=Snx17 PE=1 SV=2 - [SNX17_MOUSE]                                                    | 31.49 | 4 | 10 | 10 | 37  | 0.774 | 1.145 | 0.910 | 1.196 | 107.53  | 31.49 | 17 | 37  | 470  | 52.8  | 7.49  |
| Q9D8B6   | Protein FAM210B OS=Mus musculus GN=Fam210b PE=2 SV=3 - [F210B_MOUSE]                                                   | 13.16 | 1 | 2  | 2  | 6   | 0.480 | 0.608 | 1.304 | 1.196 | 11.73   | 13.16 | 4  | 6   | 190  | 20.3  | 10.51 |
| O54785-3 | Isoform 3 of LIM domain kinase 2 OS=Mus musculus GN=Limk2 - [LIMK2_MOUSE]                                              | 8.87  | 4 | 3  | 3  | 5   | 0.624 | 1.100 | 1.320 | 1.197 | 13.00   | 8.87  | 4  | 5   | 451  | 51.1  | 8.28  |
| Q8CJCS-2 | Isoform 2 of E3 ubiquitin-protein ligase NEURL3 OS=Mus musculus GN=Neur13 -                                            | 10.31 | 2 | 1  | 1  | 1   | 1.707 | 1.078 | 2.032 | 1.197 | 0.00    | 10.31 | 1  | 1   | 194  | 21.4  | 6.89  |
| Q811G0-2 | Isoform 2 of Protein PTHB1 OS=Mus musculus GN=Bbs9 - [PTHB1_MOUSE]                                                     | 10.11 | 6 | 7  | 7  | 15  | 1.333 | 1.924 | 0.992 | 1.197 | 47.20   | 10.11 | 11 | 15  | 880  | 98.4  | 6.19  |
| P28653   | Biglycan OS=Mus musculus GN=Bgn PE=2 SV=1 - [PGS1_MOUSE]                                                               | 22.76 | 1 | 7  | 7  | 27  | 0.908 | 4.387 | 0.985 | 1.197 | 59.37   | 22.76 | 11 | 27  | 369  | 41.6  | 7.27  |
| P58774-2 | Isoform 2 of Tropomyosin beta chain OS=Mus musculus GN=Tpm2 - [TPM2_MOUSE]                                             | 48.94 | 2 | 2  | 16 | 208 | 1.911 | 2.715 | 1.241 | 1.197 | 537.98  | 48.94 | 30 | 208 | 284  | 32.9  | 4.67  |
| Q632V0   | Insulinoma-associated protein 1 OS=Mus musculus GN=Insm1 PE=2 SV=1 - [INSM1_MOUSE]                                     | 3.07  | 1 | 1  | 1  | 1   | 0.298 | 1.056 | 0.931 | 1.197 | 3.33    | 3.07  | 1  | 1   | 521  | 54.0  | 9.01  |
| Q9ESJ1   | CDK5 and ABL1 enzyme substrate 1 OS=Mus musculus GN=Cables1 PE=1 SV=2 -                                                | 14.44 | 2 | 5  | 5  | 12  | 1.736 | 1.330 | 1.391 | 1.197 | 39.15   | 14.44 | 7  | 12  | 568  | 61.4  | 9.23  |
| Q9QXL2-4 | Isoform 4 of Kinesin-like protein KIF21A OS=Mus musculus GN=Kif21a - [KIF21A_MOUSE]                                    | 33.29 | 2 | 1  | 45 | 203 | 0.650 | 0.837 | 1.028 | 1.197 | 630.82  | 33.29 | 75 | 203 | 1616 | 180.4 | 6.34  |
| Q80U40-2 | Isoform 2 of RIMS-binding protein 2 OS=Mus musculus GN=Rimbp2 - [RIMB2_MOUSE]                                          | 23.29 | 3 | 16 | 17 | 57  | 1.292 | 1.306 | 1.758 | 1.198 | 161.25  | 23.29 | 30 | 57  | 1069 | 117.9 | 5.27  |



|          |                                                                                                                                     |       |   |    |    |     |       |       |       |       |         |       |    |     |      |       |      |
|----------|-------------------------------------------------------------------------------------------------------------------------------------|-------|---|----|----|-----|-------|-------|-------|-------|---------|-------|----|-----|------|-------|------|
| A6H5Y3   | Methionine synthase<br>OS=Mus musculus<br>GN=Mtr PE=2 SV=1 -<br>[METH_MOUSE]                                                        | 7.66  | 1 | 6  | 6  | 14  | 1.031 | 1.611 | 0.971 | 1.198 | 38.70   | 7.66  | 10 | 14  | 1253 | 139.0 | 5.57 |
| P31648   | Sodium- and chloride-<br>dependent GABA<br>transporter 1 OS=Mus<br>musculus GN=Slc6a1<br>PE=1 SV=2 -<br>[SODIUM_MOUSE]              | 16.69 | 1 | 7  | 7  | 121 | 0.663 | 0.792 | 1.036 | 1.198 | 203.76  | 16.69 | 12 | 121 | 599  | 67.0  | 7.96 |
| Q9WU84   | Copper chaperone for<br>superoxide dismutase<br>OS=Mus musculus<br>GN=Ccs PE=1 SV=1 -<br>[CCS_MOUSE]                                | 9.49  | 1 | 4  | 4  | 8   | 1.402 | 1.305 | 1.102 | 1.198 | 22.13   | 9.49  | 6  | 8   | 274  | 28.9  | 6.10 |
| D3Z093   | Lipoyltransferase 1,<br>mitochondrial (Fragment)<br>OS=Mus musculus<br>GN=Lip1 PE=2 SV=1 -<br>[D3Z093_MOUSE]                        | 9.13  | 4 | 2  | 2  | 6   | 1.246 | 0.944 | 0.944 | 1.198 | 15.90   | 9.13  | 4  | 6   | 230  | 25.7  | 9.25 |
| Q80U57   | Regulating synaptic<br>membrane exocytosis<br>protein 3 OS=Mus<br>musculus GN=Rims3 PE=1<br>SV=2 - [RIMS3_MOUSE]                    | 57.98 | 1 | 11 | 12 | 41  | 0.940 | 0.780 | 0.998 | 1.198 | 113.82  | 57.98 | 21 | 41  | 307  | 32.6  | 9.29 |
| P14152   | Malate dehydrogenase,<br>cytoplasmic OS=Mus<br>musculus GN=Mdh1 PE=1<br>SV=3 - [MDHC_MOUSE]                                         | 60.78 | 2 | 26 | 26 | 797 | 0.900 | 1.160 | 1.132 | 1.198 | 2166.75 | 60.78 | 47 | 797 | 334  | 36.5  | 6.58 |
| O70405   | Serine/threonine-protein<br>kinase ULK1 OS=Mus<br>musculus GN=Ulk1 PE=1<br>SV=1 - [ULK1_MOUSE]                                      | 12.18 | 1 | 10 | 10 | 24  | 0.962 | 0.975 | 1.058 | 1.199 | 51.50   | 12.18 | 14 | 24  | 1051 | 112.4 | 8.66 |
| Q9QZV9   | NTF2-related export<br>protein 1 OS=Mus<br>musculus GN=Nxt1 PE=1<br>SV=2 - [NXT1_MOUSE]                                             | 16.43 | 3 | 2  | 2  | 3   | 1.378 | 1.246 | 1.086 | 1.199 | 7.87    | 16.43 | 3  | 3   | 140  | 15.8  | 5.03 |
| O88839   | Disintegrin and<br>metalloproteinase domain-<br>containing protein 15<br>OS=Mus musculus<br>GN=Adam15 PE=1 SV=2 -<br>[ADAM15_MOUSE] | 15.63 | 4 | 9  | 9  | 28  | 0.922 | 0.924 | 1.098 | 1.199 | 55.93   | 15.63 | 15 | 28  | 864  | 92.6  | 6.54 |
| Q8R4N0   | Citrate lyase subunit beta-<br>like protein, mitochondrial<br>OS=Mus musculus<br>GN=Clybl PE=2 SV=2 -<br>[CLYBL_MOUSE]              | 58.28 | 1 | 16 | 16 | 76  | 1.056 | 1.184 | 1.007 | 1.199 | 228.37  | 58.28 | 28 | 76  | 338  | 37.5  | 8.54 |
| Q6PCZ4   | Melanoma-associated<br>antigen E1 OS=Mus<br>musculus GN=Magee1<br>PE=1 SV=1 -                                                       | 20.59 | 1 | 14 | 14 | 42  | 1.211 | 0.770 | 1.143 | 1.200 | 131.39  | 20.59 | 25 | 42  | 918  | 101.6 | 6.67 |
| P48962   | ADP/ATP translocase 1<br>OS=Mus musculus<br>GN=Slc25a4 PE=1 SV=4 -<br>[ADTL_MOUSE]                                                  | 72.82 | 1 | 16 | 30 | 830 | 0.654 | 0.923 | 1.017 | 1.200 | 2216.36 | 72.82 | 56 | 830 | 298  | 32.9  | 9.72 |
| O35683   | NADH dehydrogenase<br>[ubiquinone] 1 alpha<br>subcomplex subunit 1<br>OS=Mus musculus<br>GN=Ndufa1 PE=2 SV=1 -<br>[NDUFA1_MOUSE]    | 22.86 | 1 | 2  | 2  | 11  | 0.899 | 1.071 | 1.102 | 1.200 | 28.66   | 22.86 | 4  | 11  | 70   | 8.1   | 9.48 |
| Q9D394-4 | Isoform 4 of Protein<br>RUFY3 OS=Mus musculus<br>GN=Rufy3 -<br>[RUFY3_MOUSE]                                                        | 53.56 | 2 | 2  | 27 | 250 | 2.155 | 0.739 | 1.363 | 1.200 | 676.08  | 53.56 | 50 | 250 | 519  | 57.4  | 5.85 |
| Q69Z9H   | Rho GTPase-activating<br>protein 23 OS=Mus<br>musculus GN=Arhgap23<br>PE=1 SV=2 -                                                   | 21.44 | 3 | 11 | 26 | 66  | 0.812 | 0.773 | 1.050 | 1.201 | 201.50  | 21.44 | 40 | 66  | 1483 | 161.7 | 8.98 |
| Q8K0D7   | Tail-anchored protein<br>insertion receptor WRB<br>OS=Mus musculus<br>GN=Wrb PE=2 SV=1 -<br>[WRB_MOUSE]                             | 16.09 | 1 | 3  | 3  | 19  | 0.467 | 0.927 | 0.906 | 1.201 | 50.36   | 16.09 | 6  | 19  | 174  | 19.9  | 9.79 |
| Q9Z1B7   | Mitogen-activated protein<br>kinase 13 OS=Mus<br>musculus GN=Mapk13<br>PE=1 SV=2 -                                                  | 5.19  | 8 | 1  | 2  | 13  | 1.124 | 0.888 | 0.958 | 1.201 | 30.60   | 5.19  | 3  | 13  | 366  | 42.0  | 8.57 |
| P33146   | Cadherin-15 OS=Mus<br>musculus GN=Cdh15 PE=1<br>SV=3 - [CAD15_MOUSE]                                                                | 1.66  | 1 | 1  | 1  | 1   | 0.660 | 1.853 | 0.978 | 1.201 | 2.03    | 1.66  | 1  | 1   | 784  | 85.6  | 4.86 |
| G5E8B1   | Protein tyrosine<br>phosphatase, non-receptor<br>type 13 OS=Mus musculus<br>GN=Ptpn13 PE=4 SV=1 -<br>[G5E8B1_MOUSE]                 | 4.00  | 2 | 7  | 8  | 13  | 0.691 | 1.320 | 1.164 | 1.201 | 27.64   | 4.00  | 10 | 13  | 2451 | 270.1 | 6.35 |
| Q9CXP8   | Guanine nucleotide-<br>binding protein<br>G(I)/G(S)/G(O) subunit<br>gamma-10 OS=Mus<br>musculus GN=Gng10<br>PE=3 SV=1 -             | 61.76 | 2 | 3  | 4  | 12  | 0.889 | 5.644 | 1.872 | 1.201 | 42.32   | 61.76 | 8  | 12  | 68   | 7.2   | 7.85 |
| Q8R164   | Valacyclovir hydrolase<br>OS=Mus musculus<br>GN=Bphl PE=2 SV=1 -<br>[BPHL_MOUSE]                                                    | 55.33 | 1 | 14 | 14 | 55  | 1.885 | 1.189 | 1.060 | 1.201 | 158.82  | 55.33 | 26 | 55  | 291  | 32.8  | 8.94 |
| Q8BFW6   | Ectonucleoside<br>triphosphate<br>diphosphohydrolase 3<br>OS=Mus musculus<br>GN=Entpd3 PE=2 SV=1 -<br>[ENTPD3_MOUSE]                | 13.61 | 1 | 7  | 7  | 17  | 1.654 | 1.081 | 1.068 | 1.202 | 40.80   | 13.61 | 11 | 17  | 529  | 58.9  | 6.15 |
| Q6ZQ03   | Formin-binding protein 4<br>OS=Mus musculus<br>GN=Fbpb4 PE=1 SV=2 -<br>[FNBP4_MOUSE]                                                | 2.62  | 3 | 3  | 3  | 4   | 1.881 | 1.529 | 1.315 | 1.202 | 5.04    | 2.62  | 4  | 4   | 1031 | 111.2 | 4.73 |
| Q9CQ91   | NADH dehydrogenase<br>[ubiquinone] 1 alpha<br>subcomplex subunit 3<br>OS=Mus musculus<br>GN=Ndufa3 PE=1 SV=1 -<br>[NDUFA3_MOUSE]    | 57.14 | 2 | 5  | 5  | 82  | 0.870 | 0.954 | 1.072 | 1.202 | 204.87  | 57.14 | 9  | 82  | 84   | 9.3   | 8.47 |

|          |                                                                                                              |       |   |    |    |     |       |       |       |       |        |       |    |     |      |       |      |
|----------|--------------------------------------------------------------------------------------------------------------|-------|---|----|----|-----|-------|-------|-------|-------|--------|-------|----|-----|------|-------|------|
| G3UXN4   | KN motif and ankyrin repeat domain-containing protein 3 OS=Mus musculus GN=Kank3 PE=2 SV=1 - [G3UXN4_MOUSE]  | 3.81  | 4 | 2  | 3  | 4   | 1.107 | 1.381 | 0.960 | 1.202 | 8.50   | 3.81  | 4  | 4   | 603  | 64.3  | 4.84 |
| P32883-2 | Isoform 2B of GTPase KRas OS=Mus musculus GN=Kras - [RASK_MOUSE]                                             | 66.49 | 5 | 4  | 9  | 87  | 1.543 | 1.086 | 1.030 | 1.203 | 193.75 | 66.49 | 15 | 87  | 188  | 21.5  | 8.12 |
| Q5SSE9   | ATP-binding cassette sub-family A member 13 OS=Mus musculus GN=Abca13 PE=2 SV=1 - [ABCAD_MOUSE]              | 1.75  | 2 | 4  | 9  | 19  | 2.853 | 1.266 | 1.151 | 1.203 | 35.66  | 1.75  | 11 | 19  | 5034 | 568.5 | 6.52 |
| Q9WTL7   | Acyl-protein thioesterase 2 OS=Mus musculus GN=Lypla2 PE=1 SV=1 - [LYPA2_MOUSE]                              | 61.47 | 1 | 11 | 11 | 62  | 0.705 | 1.133 | 1.061 | 1.203 | 218.60 | 61.47 | 19 | 62  | 231  | 24.8  | 7.23 |
| Q8K183   | Pyridoxal kinase OS=Mus musculus GN=Pdkx PE=1 SV=1 - [PDKX_MOUSE]                                            | 60.26 | 2 | 16 | 16 | 311 | 1.409 | 1.041 | 0.906 | 1.203 | 869.71 | 60.26 | 29 | 311 | 312  | 35.0  | 6.29 |
| Q5U458   | DnaJ homolog subfamily C member 11 OS=Mus musculus GN=Dnajc11 PE=2 SV=2 -                                    | 42.04 | 3 | 21 | 21 | 71  | 1.004 | 1.071 | 1.130 | 1.203 | 220.30 | 42.04 | 37 | 71  | 559  | 63.2  | 8.32 |
| P97821   | Dipeptidyl peptidase 1 OS=Mus musculus GN=Ctsc PE=2 SV=1 - [CATC_MOUSE]                                      | 5.41  | 2 | 3  | 3  | 10  | 1.136 | 1.448 | 1.044 | 1.204 | 21.72  | 5.41  | 5  | 10  | 462  | 52.3  | 6.89 |
| H3B3L3   | Protein unc-13 homolog B (Fragment) OS=Mus musculus GN=Unc13a PE=4 SV=1 - [H3B3L3_MOUSE]                     | 43.31 | 2 | 1  | 7  | 15  | 2.240 | 1.702 | 1.444 | 1.204 | 45.76  | 43.31 | 10 | 15  | 254  | 27.9  | 5.44 |
| Q295A9   | Peripheral clock protein 1 OS=Mus musculus GN=Nckap5 PE=2 SV=1 - [Q295A9_MOUSE]                              | 1.74  | 6 | 2  | 2  | 2   | 1.826 | 1.704 | 1.140 | 1.204 | 5.97   | 1.74  | 2  | 2   | 1777 | 194.1 | 7.09 |
| D6RHQ6   | Ubiquitin carboxyl-terminal hydrolase 16 OS=Mus musculus GN=Usp16 PE=2 SV=1 - [D6RHQ6_MOUSE]                 | 8.38  | 5 | 2  | 2  | 3   | 1.698 | 0.528 | 0.941 | 1.204 | 4.26   | 8.38  | 2  | 3   | 334  | 38.1  | 8.34 |
| Q9QXZ7   | Photoreceptor-specific nuclear receptor OS=Mus musculus GN=Nr2e3 PE=1 SV=1 - [NR2E3_MOUSE]                   | 6.84  | 1 | 1  | 2  | 2   | 1.140 | 0.873 | 1.289 | 1.204 | 5.06   | 6.84  | 2  | 2   | 395  | 43.1  | 7.74 |
| Q9CWY3   | N-lysine methyltransferase SETD6 OS=Mus musculus GN=Setd6 PE=2 SV=1 - [SETD6_MOUSE]                          | 6.98  | 1 | 3  | 3  | 4   | 1.586 | 2.467 | 1.093 | 1.204 | 7.52   | 6.98  | 4  | 4   | 473  | 52.9  | 4.86 |
| O55229   | Choline/ethanolamine kinase OS=Mus musculus GN=Ctkb PE=1 SV=3 - [CHKB_MOUSE]                                 | 19.80 | 3 | 6  | 6  | 18  | 0.881 | 1.242 | 1.032 | 1.204 | 66.63  | 19.80 | 9  | 18  | 394  | 45.1  | 5.41 |
| Q8BYM8   | Probable cysteine-tRNA ligase, mitochondrial OS=Mus musculus GN=Cars2 PE=2 SV=2 - [SYCM_MOUSE]               | 20.15 | 2 | 8  | 8  | 24  | 0.852 | 1.382 | 1.036 | 1.205 | 65.13  | 20.15 | 11 | 24  | 551  | 61.2  | 8.18 |
| P51175   | Protoporphyrinogen oxidase OS=Mus musculus GN=Ppox PE=2 SV=1 - [PPOX_MOUSE]                                  | 26.00 | 1 | 8  | 9  | 22  | 0.913 | 0.945 | 1.008 | 1.205 | 72.72  | 26.00 | 17 | 22  | 477  | 50.8  | 8.84 |
| Q3UFY7-4 | Isoform 4 of 7-methylguanosine phosphate-specific 5'-nucleotidase OS=Mus musculus GN=Nt5c3b - [E9PWX1_MOUSE] | 41.78 | 4 | 11 | 11 | 38  | 0.966 | 1.172 | 0.912 | 1.205 | 84.44  | 41.78 | 19 | 38  | 292  | 33.6  | 6.54 |
| E9PWX1   | Dipeptidyl aminopeptidase-like protein 6 OS=Mus musculus GN=Dpp6 PE=2 SV=1 - [E9PWX1_MOUSE]                  | 33.29 | 3 | 2  | 26 | 184 | 0.734 | 1.115 | 1.133 | 1.205 | 507.51 | 33.29 | 51 | 184 | 859  | 97.2  | 6.48 |
| AZAKU9   | ATP synthase subunit gamma OS=Mus musculus GN=Atp5c1 PE=2 SV=1 - [AZAKU9_MOUSE]                              | 51.52 | 7 | 14 | 15 | 177 | 0.647 | 0.797 | 1.069 | 1.205 | 486.81 | 51.52 | 27 | 177 | 297  | 32.8  | 9.13 |
| Q9ES82   | Popeye domain-containing protein 2 OS=Mus musculus GN=Popdc2 PE=2 SV=1 -                                     | 7.90  | 2 | 1  | 1  | 2   | 1.857 | 0.894 | 1.161 | 1.205 | 6.03   | 7.90  | 1  | 2   | 367  | 41.2  | 5.83 |
| Q8BHE3   | Caytaxin OS=Mus musculus GN=Atcay PE=1 SV=1 - [ATCAY_MOUSE]                                                  | 22.85 | 1 | 6  | 6  | 60  | 0.745 | 1.347 | 1.171 | 1.205 | 165.89 | 22.85 | 11 | 60  | 372  | 42.2  | 4.68 |
| Q8BYR5   | Calcium-dependent secretion activator 2 OS=Mus musculus GN=Cads2 PE=1 SV=2 - [CAPS2_MOUSE]                   | 31.77 | 9 | 3  | 34 | 122 | 0.606 | 1.527 | 1.075 | 1.205 | 330.41 | 31.77 | 62 | 122 | 1297 | 147.7 | 6.14 |
| Q9JLZ8-2 | Isoform 2 of Single Ig IL-1-related receptor OS=Mus musculus GN=Sigirr - [SIGIR_MOUSE]                       | 2.07  | 2 | 1  | 1  | 1   | 1.076 | 1.233 | 1.111 | 1.205 | 1.76   | 2.07  | 1  | 1   | 387  | 43.7  | 6.92 |
| P26262   | Plasma kallikrein OS=Mus musculus GN=Klk1 PE=1 SV=2 - [KLKB1_MOUSE]                                          | 12.07 | 1 | 7  | 7  | 18  | 2.208 | 1.847 | 0.600 | 1.206 | 41.35  | 12.07 | 11 | 18  | 638  | 71.3  | 8.02 |
| O70318   | Band 4.1-like protein 2 OS=Mus musculus GN=Epb412 PE=1 SV=2 - [E41L2_MOUSE]                                  | 38.46 | 1 | 30 | 36 | 185 | 1.155 | 0.831 | 1.281 | 1.206 | 511.01 | 38.46 | 64 | 185 | 988  | 109.9 | 5.43 |
| O55126   | Protein NipSnap homolog 2 OS=Mus musculus GN=Gbas PE=2 SV=1 - [NIPS2_MOUSE]                                  | 53.02 | 2 | 14 | 15 | 68  | 0.845 | 1.099 | 1.116 | 1.206 | 204.51 | 53.02 | 26 | 68  | 281  | 32.9  | 9.26 |

|          |                                                                                                                                          |       |   |    |    |      |       |       |       |       |         |       |    |      |      |       |      |
|----------|------------------------------------------------------------------------------------------------------------------------------------------|-------|---|----|----|------|-------|-------|-------|-------|---------|-------|----|------|------|-------|------|
| Q9ER35   | Fructosamine-3-kinase<br>OS=Mus musculus<br>GN=Fn3k PE=2 SV=1 -<br>[FN3K_MOUSE]                                                          | 38.51 | 3 | 11 | 11 | 46   | 1.101 | 0.812 | 1.046 | 1.206 | 132.18  | 38.51 | 20 | 46   | 309  | 35.0  | 8.40 |
| Q9QXY6   | EH domain-containing<br>protein 3 OS=Mus<br>musculus GN=Ehd3 PE=1<br>SV=2 - [EHD3_MOUSE]                                                 | 56.64 | 1 | 18 | 31 | 193  | 0.859 | 1.505 | 1.307 | 1.206 | 556.85  | 56.64 | 57 | 193  | 535  | 60.8  | 6.46 |
| B7ZCV4   | Ubiquinone biosynthesis<br>protein COQ4 homolog,<br>mitochondrial (Fragment)<br>OS=Mus musculus<br>GN=Coc4 PE=2 SV=1 -<br>[B7ZCV4_MOUSE] | 17.50 | 2 | 1  | 3  | 8    | 0.854 | 1.515 | 0.969 | 1.206 | 23.86   | 17.50 | 6  | 8    | 200  | 22.4  | 8.84 |
| Q9E570   | Serine/threonine-protein<br>kinase Nek6 OS=Mus<br>musculus GN=Nek6 PE=1<br>SV=1 - [NEK6_MOUSE]                                           | 7.67  | 4 | 2  | 3  | 4    | 0.900 | 0.848 | 1.023 | 1.206 | 7.39    | 7.67  | 4  | 4    | 313  | 35.7  | 7.90 |
| Q91V74   | Carbonyl reductase family<br>member 4 OS=Mus<br>musculus GN=Cbr4 PE=2<br>SV=2 - [CBR4_MOUSE]                                             | 39.83 | 2 | 8  | 8  | 38   | 0.618 | 1.043 | 1.091 | 1.207 | 117.30  | 39.83 | 15 | 38   | 236  | 25.4  | 9.69 |
| Q91V77   | Ribonuclease inhibitor<br>OS=Mus musculus<br>GN=Rnh1 PE=1 SV=1 -<br>[RINH_MOUSE]                                                         | 56.14 | 1 | 19 | 19 | 106  | 1.384 | 1.220 | 0.978 | 1.207 | 331.87  | 56.14 | 32 | 106  | 456  | 49.8  | 4.78 |
| E9Q1N6   | Protein Rasgef1a OS=Mus<br>musculus GN=Rasgef1a<br>PE=2 SV=1 -<br>[E9Q1N6_MOUSE]                                                         | 16.77 | 1 | 7  | 7  | 12   | 1.040 | 3.785 | 1.645 | 1.207 | 43.44   | 16.77 | 11 | 12   | 489  | 55.8  | 8.02 |
| Q9CPT3   | N-acetylneuraminate-9-<br>phosphatase OS=Mus<br>musculus GN=Nanp PE=1<br>SV=1 - [NANP_MOUSE]                                             | 23.39 | 1 | 5  | 5  | 11   | 0.981 | 1.074 | 0.862 | 1.207 | 28.63   | 23.39 | 9  | 11   | 248  | 27.8  | 6.07 |
| P56480   | ATP synthase subunit<br>beta, mitochondrial<br>OS=Mus musculus<br>GN=Atp5b PE=1 SV=2 -<br>[ATPB_MOUSE]                                   | 84.31 | 1 | 35 | 35 | 3211 | 1.313 | 1.144 | 1.069 | 1.208 | 9996.32 | 84.31 | 65 | 3211 | 529  | 56.3  | 5.34 |
| Q5U4F6   | WD repeat-containing<br>protein 34 OS=Mus<br>musculus GN=Wdr34<br>PE=2 SV=2 -                                                            | 17.38 | 2 | 5  | 6  | 20   | 1.039 | 1.045 | 1.031 | 1.208 | 60.52   | 17.38 | 11 | 20   | 535  | 57.9  | 6.52 |
| Q9W7Z8   | Protein BEX2 OS=Mus<br>musculus GN=Bex2 PE=1<br>SV=1 - [BEX2_MOUSE]                                                                      | 24.03 | 1 | 3  | 3  | 13   | 0.910 | 1.429 | 1.012 | 1.208 | 24.81   | 24.03 | 5  | 13   | 129  | 15.4  | 6.96 |
| Q91V61-2 | Isoform 2 of Sideroflexin-3<br>OS=Mus musculus<br>GN=Sfxn3 -<br>[SPXN3_MOUSE]                                                            | 51.39 | 3 | 12 | 13 | 86   | 0.646 | 1.289 | 1.450 | 1.208 | 265.06  | 51.39 | 24 | 86   | 288  | 31.6  | 9.45 |
| F6VIG0   | Protein RMD5 homolog B<br>(Fragment) OS=Mus<br>musculus GN=Rmd5b<br>PE=4 SV=1 -<br>[F6VIG0_MOUSE]                                        | 5.95  | 2 | 1  | 1  | 5    | 2.165 | 1.149 | 1.111 | 1.208 | 11.10   | 5.95  | 1  | 5    | 185  | 20.4  | 7.25 |
| A2AH22-7 | Isoform 7 of Activating<br>molecule in BECN1-<br>regulated autophagy<br>protein 1 OS=Mus<br>musculus GN=Ambr1 -<br>[AMBR1_MOUSE]         | 4.49  | 7 | 5  | 5  | 10   | 1.242 | 1.098 | 1.158 | 1.208 | 24.36   | 4.49  | 8  | 10   | 1180 | 129.8 | 6.81 |
| Q8CDI6   | Coiled-coil domain-<br>containing protein 158<br>OS=Mus musculus<br>GN=Cdc158 PE=2 SV=1 -<br>[CD158_MOUSE]                               | 4.42  | 2 | 3  | 6  | 9    | 1.043 | 2.192 | 1.982 | 1.208 | 14.37   | 4.42  | 7  | 9    | 1109 | 126.7 | 6.40 |
| Q6PEE3   | Ribonucleoside-<br>diphosphate reductase<br>subunit M2 B OS=Mus<br>musculus GN=Rrm2b<br>PE=1 SV=1 -<br>[RPM2B_MOUSE]                     | 13.11 | 8 | 4  | 5  | 8    | 0.790 | 1.450 | 0.936 | 1.208 | 21.86   | 13.11 | 8  | 8    | 351  | 40.8  | 5.01 |
| O88329   | Unconventional myosin-1a<br>OS=Mus musculus<br>GN=Myo1a PE=2 SV=2 -<br>[MYO1A_MOUSE]                                                     | 3.93  | 1 | 1  | 4  | 13   | 0.921 | 1.320 | 1.023 | 1.209 | 25.46   | 3.93  | 5  | 13   | 1043 | 118.6 | 9.44 |
| Q8BGN8-2 | Isoform 2 of Synaptopodin<br>OS=Mus musculus<br>GN=Synpr -<br>[SYNPR_MOUSE]                                                              | 16.84 | 2 | 3  | 5  | 21   | 1.398 | 2.135 | 1.629 | 1.209 | 55.91   | 16.84 | 9  | 21   | 285  | 31.3  | 6.33 |
| Q8VE47   | Ubiquitin-like modifier-<br>activating enzyme 5<br>OS=Mus musculus<br>GN=Uba5 PE=2 SV=2 -<br>[UBA5_MOUSE]                                | 24.07 | 3 | 6  | 6  | 37   | 0.774 | 1.213 | 0.992 | 1.209 | 112.71  | 24.07 | 11 | 37   | 403  | 44.8  | 4.96 |
| E9QN99   | Alpha/beta hydrolase<br>domain-containing protein<br>14B OS=Mus musculus<br>GN=Ahh14b PE=4 SV=1 -<br>[E9QN99_MOUSE]                      | 25.71 | 2 | 4  | 4  | 15   | 1.748 | 1.072 | 1.079 | 1.209 | 47.19   | 25.71 | 7  | 15   | 210  | 22.4  | 6.52 |
| Q9CXS4   | Centromere protein V<br>OS=Mus musculus<br>GN=Cenpv PE=2 SV=2 -<br>[CENPV_MOUSE]                                                         | 55.56 | 3 | 11 | 11 | 33   | 0.717 | 0.861 | 1.196 | 1.209 | 109.56  | 55.56 | 18 | 33   | 252  | 27.5  | 9.79 |
| Q91W69   | Epsin-3 OS=Mus musculus<br>GN=Epn3 PE=2 SV=1 -<br>[EPN3_MOUSE]                                                                           | 15.88 | 1 | 4  | 8  | 25   | 2.056 | 0.443 | 1.233 | 1.209 | 62.90   | 15.88 | 13 | 25   | 636  | 68.2  | 5.88 |
| Q9J175   | Ribosyl-dihydropyridinamide<br>dehydrogenase<br>[quinone] OS=Mus<br>musculus GN=Nqo2 PE=2<br>SV=3 - [NQO2_MOUSE]                         | 47.19 | 1 | 7  | 7  | 30   | 1.637 | 1.273 | 0.966 | 1.209 | 94.05   | 47.19 | 13 | 30   | 231  | 26.2  | 7.01 |
| Q9DCT2   | NADH dehydrogenase<br>[ubiquinone] iron-sulfur<br>protein 3, mitochondrial<br>OS=Mus musculus<br>GN=Ndufs3 PE=1 SV=2 -<br>[NDUFS3_MOUSE] | 61.22 | 1 | 15 | 15 | 169  | 1.031 | 1.088 | 1.076 | 1.209 | 506.04  | 61.22 | 28 | 169  | 263  | 30.1  | 7.17 |

|         |                                                                                                                   |       |   |    |    |     |       |       |       |       |         |       |    |     |      |       |       |
|---------|-------------------------------------------------------------------------------------------------------------------|-------|---|----|----|-----|-------|-------|-------|-------|---------|-------|----|-----|------|-------|-------|
| E9Q5G3  | Protein Kif23 OS=Mus musculus GN=Kif23 PE=2 SV=1 - [E9Q5G3_MOUSE]                                                 | 2.20  | 1 | 1  | 2  | 4   | 1.622 | 1.711 | 1.367 | 1.209 | 9.44    | 2.20  | 3  | 4   | 953  | 108.7 | 8.66  |
| Q8R1T1  | Charged multivesicular body protein 7 OS=Mus musculus GN=Chmp7 PE=1 SV=1 -                                        | 30.60 | 2 | 9  | 9  | 24  | 0.726 | 1.291 | 1.124 | 1.210 | 46.26   | 30.60 | 13 | 24  | 451  | 50.6  | 5.22  |
| Q8CGV2  | Tryptophan 5-hydroxylase 2 OS=Mus musculus GN=Tph2 PE=2 SV=2 - [TPH2_MOUSE]                                       | 28.89 | 4 | 10 | 11 | 35  | 1.142 | 0.710 | 0.973 | 1.210 | 100.14  | 28.89 | 18 | 35  | 488  | 55.8  | 6.24  |
| Q9CY64  | Biliverdin reductase A OS=Mus musculus GN=Blvra PE=2 SV=1 - [BIEA_MOUSE]                                          | 53.22 | 4 | 15 | 15 | 69  | 0.769 | 0.983 | 1.038 | 1.210 | 195.75  | 53.22 | 29 | 69  | 295  | 33.5  | 7.02  |
| Q9CRC8  | Leucine-rich repeat-containing protein 40 OS=Mus musculus GN=Lrrc40 PE=2 SV=2 - [LRC40_MOUSE]                     | 52.33 | 5 | 29 | 29 | 73  | 0.737 | 1.039 | 0.950 | 1.210 | 201.39  | 52.33 | 50 | 73  | 602  | 68.0  | 6.89  |
| Q8R066  | Complement C1q tumor necrosis factor-related protein 4 OS=Mus musculus GN=C1qtnf4 PE=2 SV=1 - [C1QTNF4_MOUSE]     | 43.56 | 1 | 9  | 9  | 38  | 0.819 | 1.339 | 1.244 | 1.210 | 145.47  | 43.56 | 14 | 38  | 326  | 35.0  | 8.98  |
| Q64522  | Histone H2A type 2-B OS=Mus musculus GN=H2abh2ab PE=1 SV=3 - [H2A2B_MOUSE]                                        | 34.62 | 1 | 2  | 3  | 92  | 0.520 | 0.637 | 0.845 | 1.210 | 219.64  | 34.62 | 6  | 92  | 130  | 14.0  | 10.89 |
| Q3UW17  | Keratin, type II cytoskeletal 2 oral OS=Mus musculus GN=Krt76 PE=2 SV=1 -                                         | 5.72  | 3 | 1  | 5  | 34  | 8.604 | 1.172 | 1.400 | 1.211 | 72.10   | 5.72  | 9  | 34  | 594  | 62.8  | 8.43  |
| Q8K4I3  | Rho guanine nucleotide exchange factor 6 OS=Mus musculus GN=Arhgef6 PE=1 SV=1 - [ARHG6_MOUSE]                     | 12.58 | 5 | 6  | 10 | 33  | 0.863 | 0.863 | 0.984 | 1.211 | 85.60   | 12.58 | 17 | 33  | 771  | 87.0  | 5.87  |
| Q99L88  | Beta-1-syntrophin OS=Mus musculus GN=Sntb1 PE=1 SV=4 - [SNTB1_MOUSE]                                              | 31.10 | 2 | 11 | 13 | 37  | 1.013 | 1.117 | 1.007 | 1.211 | 111.19  | 31.10 | 20 | 37  | 537  | 58.0  | 8.31  |
| P70444  | BH3-interacting domain death agonist OS=Mus musculus GN=Bid PE=1 SV=2 - [BID_MOUSE]                               | 40.00 | 2 | 7  | 7  | 25  | 1.373 | 1.142 | 1.266 | 1.211 | 81.71   | 40.00 | 12 | 25  | 195  | 21.9  | 4.81  |
| Q8BXA5  | Cleft lip and palate transmembrane protein 1-like protein OS=Mus musculus GN=Cjptm11 PE=2 SV=1 - [CJPTM11_MOUSE]  | 7.24  | 1 | 3  | 3  | 7   | 1.319 | 1.151 | 0.861 | 1.211 | 24.90   | 7.24  | 5  | 7   | 539  | 62.1  | 8.84  |
| P63044  | Vesicle-associated membrane protein 2 OS=Mus musculus GN=Vamp2 PE=1 SV=2 - [VAMP2_MOUSE]                          | 43.10 | 2 | 2  | 5  | 365 | 0.776 | 1.979 | 1.353 | 1.211 | 1233.43 | 43.10 | 9  | 365 | 116  | 12.7  | 8.13  |
| P33609  | DNA polymerase alpha catalytic subunit OS=Mus musculus GN=Pola1 PE=1 SV=2 - [DPOLA_MOUSE]                         | 1.02  | 3 | 1  | 2  | 3   | 3.154 | 1.275 | 1.441 | 1.211 | 6.75    | 1.02  | 3  | 3   | 1465 | 167.2 | 5.74  |
| G3UZL4  | Ras-related protein Rab-11B (Fragment) OS=Mus musculus GN=Rab11b PE=3 SV=1 - [G3UZL4_MOUSE]                       | 72.00 | 2 | 1  | 7  | 39  | 0.772 | 1.860 | 1.084 | 1.211 | 105.59  | 72.00 | 12 | 39  | 125  | 14.3  | 6.18  |
| Q91WU5  | Arsenite methyltransferase OS=Mus musculus GN=As3mt PE=2 SV=2 - [AS3MT_MOUSE]                                     | 38.83 | 1 | 13 | 13 | 32  | 1.282 | 1.140 | 0.782 | 1.211 | 92.96   | 38.83 | 20 | 32  | 376  | 41.8  | 5.86  |
| B9EJ19  | Transmembrane protein 229A OS=Mus musculus GN=Tmem229a PE=2 SV=1 - [T229A_MOUSE]                                  | 11.05 | 1 | 3  | 3  | 6   | 1.007 | 0.615 | 1.055 | 1.211 | 25.03   | 11.05 | 5  | 6   | 371  | 41.5  | 9.35  |
| Q91VM9  | Inorganic pyrophosphatase 2, mitochondrial OS=Mus musculus GN=Ppa2 PE=2 SV=1 - [IPYR2_MOUSE]                      | 57.58 | 5 | 17 | 17 | 86  | 1.159 | 1.019 | 1.182 | 1.211 | 318.54  | 57.58 | 29 | 86  | 330  | 38.1  | 6.98  |
| Q91VD9  | NADH-ubiquinone oxidoreductase 75 kDa subunit, mitochondrial OS=Mus musculus GN=Ndufs1 PE=1 SV=2 - [NDUFS1_MOUSE] | 63.14 | 1 | 39 | 39 | 519 | 1.021 | 1.091 | 1.118 | 1.211 | 1695.98 | 63.14 | 75 | 519 | 727  | 79.7  | 5.72  |
| Q8CDI7  | Coiled-coil domain-containing protein 150 OS=Mus musculus GN=Ccdc150 PE=2 SV=2 - [CC150_MOUSE]                    | 1.17  | 4 | 1  | 2  | 9   | 2.933 | 1.523 | 1.562 | 1.211 | 23.83   | 1.17  | 2  | 9   | 1110 | 128.4 | 6.93  |
| Q62130  | Tyrosine-protein phosphatase non-receptor type 14 OS=Mus musculus GN=Ptpn14 PE=1 SV=2 - [PTN14_MOUSE]             | 2.19  | 1 | 1  | 2  | 3   | 2.506 | 1.026 | 1.509 | 1.211 | 7.30    | 2.19  | 2  | 3   | 1189 | 135.0 | 8.34  |
| P54071  | Isocitrate dehydrogenase [NADP], mitochondrial OS=Mus musculus GN=Idh2 PE=1 SV=3 - [IDHP_MOUSE]                   | 48.01 | 2 | 22 | 25 | 106 | 0.669 | 1.683 | 0.864 | 1.212 | 288.29  | 48.01 | 43 | 106 | 452  | 50.9  | 8.69  |
| Q9JKY7  | Cytochrome P450 CYP2D22 OS=Mus musculus GN=Cyp2d22 PE=2 SV=1 -                                                    | 22.40 | 2 | 8  | 9  | 34  | 0.799 | 0.998 | 0.820 | 1.212 | 104.33  | 22.40 | 16 | 34  | 500  | 56.4  | 6.98  |
| Q4VB4-2 | Isoform 2 of Pkchaurin OS=Mus musculus GN=Egflam - [EGFLA_MOUSE]                                                  | 2.78  | 2 | 2  | 2  | 2   | 2.980 | 2.231 | 0.785 | 1.212 | 0.00    | 2.78  | 2  | 2   | 1009 | 109.8 | 7.18  |

|          |                                                                                                       |       |   |    |    |     |       |       |       |       |         |       |    |     |      |       |      |
|----------|-------------------------------------------------------------------------------------------------------|-------|---|----|----|-----|-------|-------|-------|-------|---------|-------|----|-----|------|-------|------|
| P33174   | Chromosome-associated kinesin KIF4 OS=Mus musculus GN=Kif4 PE=1 SV=3 - [KIF4_MOUSE]                   | 6.09  | 1 | 3  | 7  | 11  | 1.591 | 1.818 | 1.056 | 1.212 | 19.77   | 6.09  | 8  | 11  | 1231 | 139.4 | 6.68 |
| Q6PAJ1   | Breakpoint cluster region protein OS=Mus musculus GN=Bcr PE=1 SV=3 - [BCR_MOUSE]                      | 22.52 | 1 | 21 | 26 | 100 | 0.838 | 1.095 | 1.475 | 1.212 | 286.81  | 22.52 | 43 | 100 | 1270 | 143.0 | 6.92 |
| A2A8K5   | Probable G-protein-coupled receptor 153 OS=Mus musculus GN=Gpr153 PE=2 SV=1 - [A2A8K5_MOUSE]          | 2.47  | 2 | 1  | 1  | 4   | 0.765 | 0.811 | 0.789 | 1.212 | 17.31   | 2.47  | 2  | 4   | 608  | 66.2  | 8.06 |
| Q9EQP2   | EH domain-containing protein 4 OS=Mus musculus GN=Ehd4 PE=1 SV=1 - [EHD4_MOUSE]                       | 47.50 | 1 | 20 | 26 | 98  | 0.765 | 1.482 | 1.058 | 1.213 | 285.55  | 47.50 | 43 | 98  | 541  | 61.4  | 6.76 |
| O08848   | 60 kDa SS-A/Ro ribonucleoprotein OS=Mus musculus GN=Trove2 PE=1 SV=1 - [TROVE2_MOUSE]                 | 17.29 | 1 | 7  | 7  | 20  | 0.763 | 0.824 | 0.927 | 1.213 | 58.25   | 17.29 | 12 | 20  | 538  | 60.1  | 7.90 |
| Q8K1S3-2 | isoform 2 of Ntrin receptor UNCSB OS=Mus musculus GN=Unc5b - [UNCSB_MOUSE]                            | 6.53  | 2 | 4  | 5  | 8   | 1.470 | 1.058 | 1.174 | 1.213 | 14.98   | 6.53  | 7  | 8   | 934  | 102.4 | 6.05 |
| Q80T62   | Probable G-protein coupled receptor 101 OS=Mus musculus GN=Gpr101 PE=2 SV=2 - [GP101_MOUSE]           | 3.13  | 1 | 2  | 2  | 2   | 1.242 | 1.366 | 0.961 | 1.213 | 4.11    | 3.13  | 2  | 2   | 511  | 56.2  | 5.77 |
| Q8BIQ3   | Zinc finger protein 2 OS=Mus musculus GN=Znf2 PE=2 SV=1 - [ZNF2_MOUSE]                                | 6.32  | 1 | 2  | 3  | 4   | 1.492 | 1.970 | 1.347 | 1.213 | 11.46   | 6.32  | 4  | 4   | 427  | 48.6  | 8.79 |
| Q8CHZ9   | Transcription termination factor, mitochondrial OS=Mus musculus GN=Mterf PE=2 SV=1 - [MTERF_MOUSE]    | 5.80  | 2 | 2  | 2  | 3   | 2.153 | 1.035 | 1.208 | 1.213 | 6.53    | 5.80  | 2  | 3   | 379  | 43.8  | 9.06 |
| Q9D075   | tRNA methyltransferase 10 homolog B OS=Mus musculus GN=Trmt10b PE=2 SV=2 - [TRMT10B_MOUSE]            | 1.89  | 3 | 1  | 1  | 1   | 0.743 | 0.784 | 0.899 | 1.214 | 2.26    | 1.89  | 1  | 1   | 318  | 36.4  | 7.71 |
| Q9JKZ2   | Sodium/myo-inositol cotransporter OS=Mus musculus GN=Slc5a3 PE=1 SV=2 - [SLC5A3_MOUSE]                | 11.84 | 1 | 5  | 5  | 33  | 1.362 | 1.010 | 0.979 | 1.214 | 47.00   | 11.84 | 8  | 33  | 718  | 79.5  | 7.30 |
| Q7TP55   | C2 domain-containing protein 5 OS=Mus musculus GN=C2cd5 PE=1 SV=2 - [C2CD5_MOUSE]                     | 15.45 | 4 | 14 | 14 | 28  | 1.331 | 1.283 | 1.189 | 1.214 | 63.91   | 15.45 | 20 | 28  | 1016 | 111.6 | 5.78 |
| O70423   | Membrane primary amine oxidase OS=Mus musculus GN=Aoc3 PE=2 SV=3 - [AOC3_MOUSE]                       | 15.82 | 3 | 11 | 11 | 43  | 0.723 | 2.710 | 0.899 | 1.214 | 162.58  | 15.82 | 20 | 43  | 765  | 84.5  | 6.42 |
| MQQUW0   | CXXC-type zinc finger protein 4 OS=Mus musculus GN=Cxxc4 PE=4 SV=1 - [CXXC4_MOUSE]                    | 11.20 | 1 | 1  | 1  | 4   | 1.100 | 1.222 | 1.048 | 1.214 | 2.02    | 11.20 | 1  | 4   | 366  | 36.4  | 9.07 |
| Q3UN16   | Probable G-protein coupled receptor 162 OS=Mus musculus GN=Gpr162 PE=2 SV=2 - [GP162_MOUSE]           | 22.28 | 1 | 10 | 10 | 26  | 0.742 | 1.066 | 1.421 | 1.214 | 81.73   | 22.28 | 16 | 26  | 588  | 64.1  | 8.79 |
| Q8BIK4   | Dedicator of cytokinesis protein 9 OS=Mus musculus GN=Dock9 PE=1 SV=2 - [DOCK9_MOUSE]                 | 20.00 | 3 | 1  | 36 | 96  | 0.832 | 0.686 | 1.181 | 1.214 | 253.76  | 20.00 | 58 | 96  | 2055 | 235.2 | 7.25 |
| P01887   | Beta-2-microglobulin OS=Mus musculus GN=B2m PE=1 SV=2 - [B2MG_MOUSE]                                  | 40.34 | 1 | 4  | 4  | 13  | 2.400 | 1.435 | 1.095 | 1.214 | 36.41   | 40.34 | 6  | 13  | 119  | 13.8  | 8.44 |
| Q8BZF8   | Phosphoglucosyltransferase-like protein 5 OS=Mus musculus GN=Pgm5 PE=1 SV=2 - [PGM5_MOUSE]            | 21.52 | 1 | 9  | 11 | 30  | 1.244 | 2.382 | 0.962 | 1.214 | 71.94   | 21.52 | 17 | 30  | 567  | 62.2  | 7.18 |
| Q0VGM9-4 | isoform 4 of Regulator of telomere elongation helicase 1 OS=Mus musculus GN=Rtel1 - [RTEL1_MOUSE]     | 2.13  | 5 | 2  | 2  | 2   | 2.476 | 1.915 | 1.522 | 1.214 | 4.33    | 2.13  | 2  | 2   | 1128 | 125.8 | 8.15 |
| P97765   | WW domain-binding protein 2 OS=Mus musculus GN=Wbp2 PE=1 SV=1 - [WBP2_MOUSE]                          | 49.04 | 2 | 11 | 12 | 68  | 1.834 | 1.196 | 1.147 | 1.214 | 203.73  | 49.04 | 20 | 68  | 261  | 28.0  | 6.33 |
| Q6P5G0   | Mitogen-activated protein kinase 4 OS=Mus musculus GN=Mapk4 PE=1 SV=1 - [MAPK4_MOUSE]                 | 5.66  | 3 | 2  | 3  | 5   | 1.285 | 1.548 | 1.592 | 1.214 | 14.82   | 5.66  | 5  | 5   | 583  | 65.5  | 5.40 |
| P61264   | Syntaxin-1B OS=Mus musculus GN=Stx1b PE=1 SV=1 - [STX1B_MOUSE]                                        | 72.92 | 1 | 18 | 24 | 496 | 1.081 | 1.043 | 1.115 | 1.215 | 1605.03 | 72.92 | 38 | 496 | 288  | 33.2  | 5.38 |
| E9Q0C6   | Protein Gm14569 OS=Mus musculus GN=Gm14569 PE=4 SV=1 - [E9Q0C6_MOUSE]                                 | 1.89  | 6 | 3  | 3  | 4   | 0.875 | 0.848 | 0.983 | 1.215 | 6.69    | 1.89  | 3  | 4   | 1637 | 180.9 | 8.70 |
| Q8VCW8   | Acyl-CoA synthetase family member 2, mitochondrial OS=Mus musculus GN=Acsf2 PE=2 SV=1 - [ACSF2_MOUSE] | 37.40 | 1 | 20 | 20 | 101 | 0.828 | 1.145 | 0.873 | 1.215 | 322.08  | 37.40 | 37 | 101 | 615  | 67.9  | 8.18 |
| Q8R127   | Saccharopine dehydrogenase-like oxidoreductase OS=Mus musculus GN=Sccpdh PE=2 SV=1 - [SCCPDH_MOUSE]   | 43.59 | 4 | 14 | 14 | 67  | 0.775 | 0.574 | 0.895 | 1.215 | 202.33  | 43.59 | 24 | 67  | 429  | 47.1  | 8.60 |

|          |                                                                                                                              |       |   |    |    |      |       |       |       |       |         |       |    |      |      |       |      |
|----------|------------------------------------------------------------------------------------------------------------------------------|-------|---|----|----|------|-------|-------|-------|-------|---------|-------|----|------|------|-------|------|
| E9PWG9   | Mitogen-activated protein kinase kinase kinase 5<br>OS=Mus musculus<br>GN=Map3k5 PE=2 SV=1 - [E9PWG9_MOUSE]                  | 12.83 | 4 | 14 | 16 | 42   | 0.616 | 1.779 | 1.369 | 1.215 | 131.04  | 12.83 | 26 | 42   | 1372 | 153.5 | 5.78 |
| Q3UHH1-2 | Isoform 2 of Zinc finger SWIM domain-containing protein 8 OS=Mus musculus GN=Zswim8 - [ZSWIM8_MOUSE]                         | 8.40  | 5 | 11 | 11 | 32   | 0.994 | 0.817 | 1.310 | 1.215 | 90.49   | 8.40  | 19 | 32   | 1798 | 193.4 | 6.99 |
| P47199   | Quinone oxidoreductase<br>OS=Mus musculus<br>GN=Cryz PE=2 SV=1 - [QOR_MOUSE]                                                 | 45.92 | 5 | 12 | 12 | 48   | 0.912 | 1.335 | 1.172 | 1.216 | 148.44  | 45.92 | 21 | 48   | 331  | 35.2  | 8.07 |
| Q9WV27   | Sodium/potassium-transporting ATPase subunit alpha-4 OS=Mus musculus GN=Atpla4 PE=1 SV=3 - [ATPLA4_MOUSE]                    | 17.83 | 1 | 4  | 19 | 1179 | 1.217 | 0.994 | 0.945 | 1.216 | 3429.14 | 17.83 | 34 | 1179 | 1032 | 114.8 | 5.71 |
| Q9D0P8   | Intraflagellar transport protein 27 homolog<br>OS=Mus musculus<br>GN=Ift27 PE=1 SV=1 - [IFT27_MOUSE]                         | 19.89 | 1 | 3  | 3  | 8    | 0.945 | 1.276 | 0.930 | 1.216 | 25.52   | 19.89 | 6  | 8    | 186  | 20.8  | 5.20 |
| P47746   | Cannabinoid receptor 1<br>OS=Mus musculus<br>GN=Cnr1 PE=2 SV=1 - [CNR1_MOUSE]                                                | 12.47 | 1 | 5  | 5  | 24   | 0.573 | 1.206 | 1.261 | 1.216 | 79.28   | 12.47 | 8  | 24   | 473  | 52.8  | 8.27 |
| Q8R3B1   | 1-phosphatidylinositol 4,5-bisphosphatase phosphodiesterase delta-1<br>OS=Mus musculus<br>GN=Plcd1 PE=2 SV=2 - [PLCD1_MOUSE] | 17.33 | 1 | 10 | 11 | 40   | 0.850 | 1.479 | 1.304 | 1.216 | 105.32  | 17.33 | 19 | 40   | 756  | 85.8  | 6.21 |
| J3QQ16   | Protein Col6a3 OS=Mus musculus GN=Col6a3 PE=4 SV=1 - [J3QQ16_MOUSE]                                                          | 19.09 | 3 | 42 | 43 | 99   | 0.817 | 3.622 | 0.828 | 1.216 | 261.73  | 19.09 | 74 | 99   | 2677 | 288.5 | 8.53 |
| H7BX60   | Protein Pot1b OS=Mus musculus GN=Pot1b PE=4 SV=1 - [H7BX60_MOUSE]                                                            | 2.03  | 1 | 1  | 1  | 1    | 1.988 | 1.666 | 2.152 | 1.217 | 0.00    | 2.03  | 1  | 1    | 640  | 71.6  | 6.10 |
| Q9JJV5   | Voltage-dependent calcium channel gamma-3 subunit<br>OS=Mus musculus<br>GN=Cacng3 PE=1 SV=2 - [CCG3_MOUSE]                   | 24.44 | 1 | 6  | 7  | 13   | 0.501 | 2.782 | 2.286 | 1.217 | 46.73   | 24.44 | 13 | 13   | 315  | 35.5  | 9.48 |
| Q8B1P0   | Aspartate--tRNA ligase, mitochondrial OS=Mus musculus GN=Dars2 PE=2 SV=1 - [SYDM_MOUSE]                                      | 18.68 | 1 | 10 | 10 | 19   | 0.889 | 1.143 | 1.114 | 1.217 | 49.02   | 18.68 | 15 | 19   | 653  | 74.1  | 6.98 |
| Q99JB8   | Protein kinase C and casein kinase II substrate protein 3 OS=Mus musculus GN=Pacsin3 PE=1 SV=1 - [PACSN3_MOUSE]              | 30.19 | 8 | 10 | 10 | 42   | 1.253 | 0.930 | 1.356 | 1.217 | 144.25  | 30.19 | 19 | 42   | 424  | 48.6  | 6.10 |
| Q62442-2 | Isoform 2 of Vesicle-associated membrane protein 1 OS=Mus musculus GN=Vamp1 - [VAMP1_MOUSE]                                  | 70.09 | 3 | 5  | 6  | 65   | 1.141 | 0.759 | 0.978 | 1.217 | 172.83  | 70.09 | 9  | 65   | 117  | 12.7  | 8.47 |
| D3Z0Z9   | Glyceraldehyde-3-phosphate dehydrogenase OS=Mus musculus GN=Gm5069 PE=3 SV=1 - [D3Z0Z9_MOUSE]                                | 62.31 | 1 | 4  | 21 | 976  | 0.646 | 1.098 | 1.349 | 1.217 | 2532.43 | 62.31 | 40 | 976  | 337  | 36.5  | 7.74 |
| E9Q0K9   | ELMO domain-containing protein 1 OS=Mus musculus GN=Elmod1 PE=2 SV=1 - [ELMOD1_MOUSE]                                        | 28.53 | 2 | 7  | 8  | 25   | 0.701 | 1.016 | 1.325 | 1.217 | 59.26   | 28.53 | 11 | 25   | 326  | 37.9  | 8.28 |
| P62748   | Hippocampin-like protein 1 OS=Mus musculus GN=Hpcal1 PE=2 SV=2 - [HPCL1_MOUSE]                                               | 66.84 | 1 | 5  | 13 | 200  | 1.408 | 2.491 | 1.038 | 1.217 | 560.23  | 66.84 | 24 | 200  | 193  | 22.3  | 5.50 |
| D3YZV2   | Potassium voltage-gated channel subfamily C member 3 OS=Mus musculus GN=Kcnc3 PE=2 SV=1 - [D3YZV2_MOUSE]                     | 9.23  | 6 | 5  | 7  | 16   | 1.663 | 0.381 | 1.013 | 1.217 | 39.47   | 9.23  | 12 | 16   | 769  | 81.9  | 6.98 |
| A2AIR9   | Voltage-dependent N-type calcium channel subunit alpha-1B OS=Mus musculus GN=Cacna1b PE=2 SV=1 - [CACNA1B_MOUSE]             | 11.27 | 6 | 15 | 20 | 51   | 0.917 | 1.457 | 1.439 | 1.217 | 160.71  | 11.27 | 32 | 51   | 2325 | 261.1 | 8.56 |
| Q60790   | Ras GTPase-activating protein 3 OS=Mus musculus GN=Rasa3 PE=1 SV=2 - [RASA3_MOUSE]                                           | 29.86 | 2 | 22 | 24 | 61   | 0.788 | 0.791 | 1.208 | 1.218 | 166.68  | 29.86 | 44 | 61   | 834  | 95.9  | 7.34 |
| B7ZCA7   | Kazrin (Fragment)<br>OS=Mus musculus<br>GN=Kazn PE=2 SV=1 - [B7ZCA7_MOUSE]                                                   | 48.28 | 1 | 1  | 11 | 55   | 1.237 | 0.688 | 1.399 | 1.218 | 148.03  | 48.28 | 17 | 55   | 261  | 29.6  | 8.54 |
| Q6P8J2   | Diamine acetyltransferase 2 OS=Mus musculus GN=Sat2 PE=2 SV=1 - [SAT2_MOUSE]                                                 | 8.24  | 1 | 2  | 2  | 7    | 1.249 | 1.044 | 0.894 | 1.218 | 16.48   | 8.24  | 4  | 7    | 170  | 19.3  | 6.04 |
| Q354Z7   | DNA-directed RNA polymerase III subunit RPC9 OS=Mus musculus GN=Crp PE=2 SV=1 - [RPC9_MOUSE]                                 | 25.00 | 1 | 2  | 2  | 5    | 1.408 | 1.421 | 1.222 | 1.218 | 20.52   | 25.00 | 3  | 5    | 148  | 16.7  | 5.00 |
| P30275   | Creatine kinase U-type, mitochondrial OS=Mus musculus GN=Ckmt1 PE=1 SV=1 - [KCRU_MOUSE]                                      | 64.35 | 5 | 19 | 25 | 565  | 1.047 | 1.097 | 1.123 | 1.218 | 1667.11 | 64.35 | 46 | 565  | 418  | 47.0  | 8.16 |

|          |                                                                                                                                |       |   |    |    |      |       |       |       |       |         |       |    |      |      |       |       |
|----------|--------------------------------------------------------------------------------------------------------------------------------|-------|---|----|----|------|-------|-------|-------|-------|---------|-------|----|------|------|-------|-------|
| P62482   | Voltage-gated potassium channel subunit beta-2<br>OS=Mus musculus<br>GN=Kcnab2 PE=1 SV=1 - [KCAB2_MOUSE]                       | 56.13 | 5 | 17 | 20 | 125  | 0.942 | 0.685 | 1.151 | 1.218 | 325.50  | 56.13 | 34 | 125  | 367  | 41.0  | 9.00  |
| Q8BQR4-4 | Isoform 3 of KAT8 regulatory NSL complex subunit 2 OS=Mus musculus GN=Kansl2 - [KANL2_MOUSE]                                   | 7.64  | 4 | 1  | 1  | 2    | 0.899 | 1.002 | 0.955 | 1.218 | 5.48    | 7.64  | 1  | 2    | 157  | 17.6  | 9.63  |
| E9Q3H7   | Protein Dnah6 OS=Mus musculus GN=Dnah6 PE=2 SV=1 - [E9Q3H7_MOUSE]                                                              | 1.64  | 3 | 5  | 6  | 6    | 0.946 | 1.361 | 1.340 | 1.218 | 10.82   | 1.64  | 6  | 6    | 4092 | 468.3 | 5.66  |
| Q7TSF1   | Desmoglein-1-beta OS=Mus musculus GN=Dsg1b PE=1 SV=1 - [DSG1B_MOUSE]                                                           | 8.11  | 4 | 4  | 5  | 5    | 2.511 | 1.062 | 1.380 | 1.218 | 13.30   | 8.11  | 5  | 5    | 1060 | 114.4 | 4.84  |
| Q9CQH3   | NADH dehydrogenase [ubiquinone] 1 beta subcomplex subunit 5, mitochondrial OS=Mus musculus GN=Ndufb5 PE=1 SV=1 - [NDUB5_MOUSE] | 31.75 | 5 | 6  | 6  | 34   | 0.911 | 1.070 | 1.160 | 1.218 | 105.54  | 31.75 | 11 | 34   | 189  | 21.7  | 9.41  |
| Q8C7J6   | Potassium channel tetramerisation domain containing 12b OS=Mus musculus GN=Kctd12b PE=2 SV=1 - [KCTD12B_MOUSE]                 | 11.99 | 1 | 1  | 4  | 12   | 1.422 | 0.598 | 0.460 | 1.218 | 29.72   | 11.99 | 7  | 12   | 292  | 33.3  | 5.95  |
| P47740   | Fatty aldehyde dehydrogenase OS=Mus musculus GN=Aldh3a2 PE=2 SV=2 - [ALDH3A2_MOUSE]                                            | 28.72 | 3 | 9  | 13 | 52   | 0.838 | 1.078 | 1.043 | 1.219 | 148.75  | 28.72 | 22 | 52   | 484  | 53.9  | 8.35  |
| B1AXP3   | MCG1697, isoform CRA_a OS=Mus musculus GN=Fam154a PE=4 SV=1 - [B1AXP3_MOUSE]                                                   | 3.57  | 1 | 1  | 1  | 2    | 1.595 | 1.364 | 1.169 | 1.219 | 0.00    | 3.57  | 1  | 2    | 476  | 54.7  | 8.82  |
| Q7M760   | Ubiquitin thioesterase Zranb1 OS=Mus musculus GN=Zranb1 PE=2 SV=1 - [ZRAN1_MOUSE]                                              | 3.25  | 1 | 2  | 2  | 4    | 1.792 | 1.165 | 1.400 | 1.219 | 8.20    | 3.25  | 3  | 4    | 708  | 80.9  | 5.68  |
| Q52KR2   | Leucine-rich repeats and immunoglobulin-like domains protein 2 OS=Mus musculus GN=Lrig2 PE=2 SV=1 - [LRIG2_MOUSE]              | 3.70  | 2 | 3  | 3  | 9    | 1.040 | 1.088 | 0.944 | 1.219 | 32.13   | 3.70  | 5  | 9    | 1054 | 117.8 | 5.49  |
| P16125   | L-lactate dehydrogenase B chain OS=Mus musculus GN=Ldhb PE=1 SV=2 - [LDHB_MOUSE]                                               | 64.67 | 5 | 21 | 24 | 426  | 0.868 | 0.975 | 1.207 | 1.219 | 1142.27 | 64.67 | 44 | 426  | 334  | 36.5  | 6.05  |
| Q8BGY6   | Lactosylceramide 1,3-N-acetyl-beta-D-glucosaminyltransferase OS=Mus musculus GN=B3gnt5 PE=2 SV=1 - [B3GNT5_MOUSE]              | 11.17 | 1 | 2  | 2  | 2    | 0.850 | 0.425 | 1.819 | 1.220 | 2.94    | 11.17 | 2  | 2    | 376  | 43.9  | 9.10  |
| Q8C3V4   | Signal transducer and activator of transcription 1 OS=Mus musculus GN=Stat1 PE=2 SV=1 - [Q8C3V4_MOUSE]                         | 25.77 | 2 | 15 | 15 | 29   | 1.112 | 1.190 | 1.057 | 1.220 | 82.99   | 25.77 | 23 | 29   | 749  | 87.3  | 5.71  |
| G5E881   | Mitochondrial translocator assembly and maintenance protein 41 homolog OS=Mus musculus GN=Tamm41 PE=4 SV=1 - [G5E881_MOUSE]    | 34.12 | 6 | 9  | 9  | 29   | 0.687 | 0.755 | 1.144 | 1.220 | 70.11   | 34.12 | 15 | 29   | 337  | 37.9  | 9.11  |
| Q3U7R1   | Extended synaptotagmin-1 OS=Mus musculus GN=Esy1 PE=2 SV=2 - [ESYT1_MOUSE]                                                     | 24.45 | 6 | 19 | 21 | 58   | 1.075 | 0.992 | 0.883 | 1.220 | 195.62  | 24.45 | 38 | 58   | 1092 | 121.5 | 5.95  |
| Q99LB2   | Dehydrogenase/reductase SDR family member 4 OS=Mus musculus GN=Dhrs4 PE=2 SV=3 - [DHRS4_MOUSE]                                 | 45.16 | 1 | 12 | 12 | 30   | 1.492 | 1.162 | 0.990 | 1.220 | 87.11   | 45.16 | 22 | 30   | 279  | 29.9  | 9.38  |
| Q9CPQ1   | Cytochrome c oxidase subunit 6C OS=Mus musculus GN=Cox6c PE=1 SV=3 - [COX6C_MOUSE]                                             | 47.37 | 2 | 8  | 8  | 72   | 0.895 | 0.973 | 1.122 | 1.220 | 157.35  | 47.37 | 14 | 72   | 76   | 8.5   | 10.14 |
| P70423   | Cationic amino acid transporter 3 OS=Mus musculus GN=Slc7a3 PE=2 SV=1 - [SLC7A3_MOUSE]                                         | 4.21  | 1 | 2  | 2  | 5    | 0.848 | 1.025 | 0.943 | 1.220 | 21.02   | 4.21  | 3  | 5    | 618  | 67.4  | 7.37  |
| Q04447   | Creatine kinase B-type OS=Mus musculus GN=Ckb PE=1 SV=1 - [KCRB_MOUSE]                                                         | 89.76 | 1 | 27 | 30 | 2525 | 1.509 | 0.997 | 1.264 | 1.221 | 7554.81 | 89.76 | 55 | 2525 | 381  | 42.7  | 5.67  |
| Q8BZ23   | NEDD4-like E3 ubiquitin-protein ligase WWP1 OS=Mus musculus GN=Wwp1 PE=1 SV=2 - [WWP1_MOUSE]                                   | 17.76 | 1 | 9  | 14 | 40   | 1.062 | 0.900 | 1.170 | 1.221 | 110.60  | 17.76 | 22 | 40   | 918  | 104.6 | 6.38  |
| Q3ULD5   | Methylcrotonoyl-CoA carboxylase beta chain, mitochondrial OS=Mus musculus GN=Mccc2 PE=2 SV=1 - [MCCB_MOUSE]                    | 46.18 | 1 | 18 | 18 | 90   | 0.792 | 1.084 | 0.958 | 1.221 | 277.02  | 46.18 | 33 | 90   | 563  | 61.3  | 8.00  |
| Q8BG73   | SH3 domain-binding glutamic acid-rich-like protein 2 OS=Mus musculus GN=Sh3bgrl2 PE=1 SV=1 - [SH3BGR12_MOUSE]                  | 66.36 | 1 | 5  | 5  | 55   | 1.491 | 1.294 | 1.327 | 1.221 | 156.02  | 66.36 | 9  | 55   | 107  | 12.2  | 5.55  |
| Q6A058   | Armادillo repeat-containing X-linked protein 2 OS=Mus musculus GN=Armcx2 PE=2 SV=2 - [ARMX2_MOUSE]                             | 24.36 | 1 | 12 | 12 | 44   | 1.501 | 0.848 | 1.097 | 1.221 | 168.43  | 24.36 | 20 | 44   | 784  | 81.0  | 9.33  |

|          |                                                                                                                       |       |   |    |    |     |       |       |       |       |         |       |    |     |      |       |      |
|----------|-----------------------------------------------------------------------------------------------------------------------|-------|---|----|----|-----|-------|-------|-------|-------|---------|-------|----|-----|------|-------|------|
| Q5DTT3   | Protein FAM208B OS=Mus musculus GN=Fam208b PE=2 SV=2 - [F208B_MOUSE]                                                  | 0.71  | 1 | 1  | 2  | 4   | 0.601 | 0.187 | 1.080 | 1.221 | 5.86    | 0.71  | 2  | 4   | 2382 | 264.1 | 6.44 |
| B0R054   | Rab9 effector protein with kelch motifs OS=Mus musculus GN=Rabepk PE=2 SV=1 - [B0R054_MOUSE]                          | 20.43 | 5 | 6  | 6  | 18  | 1.508 | 1.105 | 1.044 | 1.221 | 56.97   | 20.43 | 11 | 18  | 372  | 40.2  | 5.74 |
| Q8VCN5   | Cystathionine gamma-lyase OS=Mus musculus GN=Cth PE=1 SV=1 - [CGL_MOUSE]                                              | 20.60 | 1 | 6  | 6  | 18  | 1.582 | 0.770 | 0.953 | 1.221 | 57.96   | 20.60 | 11 | 18  | 398  | 43.5  | 7.65 |
| Q5NCB9   | Tripartite motif-containing protein 7 (Fragment) OS=Mus musculus GN=Trim7 PE=2 SV=2 - [Q5NCB9_MOUSE]                  | 25.93 | 1 | 1  | 1  | 3   | 0.596 | 6.035 | 1.218 | 1.221 | 7.72    | 25.93 | 1  | 3   | 54   | 6.1   | 4.78 |
| P61458   | Pterin-4-alpha-carbinolamine dehydratase OS=Mus musculus GN=Pcbd1 PE=1 SV=2 - [PHS_MOUSE]                             | 51.92 | 1 | 4  | 5  | 14  | 1.996 | 0.833 | 0.968 | 1.221 | 36.95   | 51.92 | 8  | 14  | 104  | 12.0  | 6.80 |
| Q8C413   | Diacylglycerol kinase gamma OS=Mus musculus GN=Dqkg PE=2 SV=1 - [Q8C413_MOUSE]                                        | 17.36 | 3 | 10 | 11 | 25  | 0.912 | 1.983 | 1.198 | 1.222 | 68.21   | 17.36 | 18 | 25  | 749  | 83.9  | 6.39 |
| Q91VA7   | Isocitrate dehydrogenase 3 (NAD+) beta OS=Mus musculus GN=Ihd3b PE=2 SV=1 - [Q91VA7_MOUSE]                            | 54.69 | 1 | 19 | 21 | 257 | 0.788 | 0.979 | 1.127 | 1.222 | 798.59  | 54.69 | 38 | 257 | 384  | 42.2  | 8.60 |
| Q542I8   | Integrin beta OS=Mus musculus GN=Itgb2 PE=2 SV=1 - [Q542I8_MOUSE]                                                     | 16.36 | 5 | 11 | 11 | 20  | 1.015 | 1.172 | 1.142 | 1.222 | 60.37   | 16.36 | 18 | 20  | 770  | 84.8  | 7.05 |
| P18872   | Guanine nucleotide-binding protein G(o) subunit alpha OS=Mus musculus GN=Gnao1 PE=1 SV=3 - [GNAO1_MOUSE]              | 64.97 | 7 | 7  | 24 | 547 | 0.571 | 1.459 | 1.302 | 1.222 | 1450.52 | 64.97 | 46 | 547 | 354  | 40.1  | 5.53 |
| P01642   | Ig kappa chain V-V region L7 (Fragment) OS=Mus musculus GN=Gm10881 PE=1 SV=1 - [KV5A9_MOUSE]                          | 10.43 | 1 | 1  | 1  | 4   | 2.325 | 1.933 | 1.418 | 1.222 | 10.25   | 10.43 | 2  | 4   | 115  | 12.6  | 5.94 |
| Q9CYZ8-2 | Isoform 2 of Single-stranded DNA-binding protein 2 OS=Mus musculus GN=Ssbp2 - [SSBP2_MOUSE]                           | 8.76  | 3 | 2  | 2  | 7   | 1.527 | 1.045 | 1.422 | 1.222 | 18.60   | 8.76  | 3  | 7   | 331  | 35.0  | 6.87 |
| D3YTK5   | THAP domain-containing protein 1 (Fragment) OS=Mus musculus GN=Thap1 PE=2 SV=1 - [D3YTK5_MOUSE]                       | 3.89  | 2 | 1  | 1  | 1   | 1.221 | 2.183 | 1.277 | 1.222 | 2.39    | 3.89  | 1  | 1   | 180  | 21.2  | 8.43 |
| Q810A3   | Tetratricopeptide repeat protein 9C OS=Mus musculus GN=Ttc9c PE=2 SV=1 - [TTC9C_MOUSE]                                | 24.56 | 2 | 3  | 4  | 10  | 0.716 | 1.233 | 1.061 | 1.222 | 26.40   | 24.56 | 7  | 10  | 171  | 20.0  | 9.29 |
| P52825   | Carnitine O-palmitoyltransferase 2, mitochondrial OS=Mus musculus GN=Cpt2 PE=1 SV=2 - [CPT2_MOUSE]                    | 32.22 | 4 | 16 | 16 | 51  | 0.906 | 1.093 | 0.765 | 1.222 | 156.88  | 32.22 | 27 | 51  | 658  | 73.9  | 8.37 |
| G3X9S2   | Ectonucleotide pyrophosphatase/phosphodiesterase 1, isoform CRA_d OS=Mus musculus GN=Enpp1 PE=1 SV=1 - [G3X9S2_MOUSE] | 15.91 | 4 | 12 | 12 | 26  | 1.273 | 1.755 | 1.096 | 1.223 | 75.51   | 15.91 | 20 | 26  | 905  | 103.0 | 6.57 |
| A7E1Z5   | Electrogenic Na-bicarbonate cotransporter splice variant NBCe1-E OS=Mus musculus GN=Slc4a4 PE=2 SV=1 - [NBCE1E_MOUSE] | 26.92 | 7 | 2  | 26 | 160 | 0.877 | 0.694 | 1.144 | 1.223 | 425.87  | 26.92 | 46 | 160 | 1070 | 120.4 | 6.84 |
| Q99JZ4   | GTP-binding protein SAR1a OS=Mus musculus GN=Sar1a PE=2 SV=1 - [Q99JZ4_MOUSE]                                         | 44.44 | 2 | 3  | 7  | 31  | 1.398 | 1.090 | 1.071 | 1.223 | 104.39  | 44.44 | 12 | 31  | 198  | 22.4  | 6.68 |
| Q61503   | 5'-nucleotidase OS=Mus musculus GN=Nt5e PE=1 SV=2 - [SVTD_MOUSE]                                                      | 11.63 | 1 | 6  | 6  | 21  | 1.441 | 1.415 | 1.733 | 1.223 | 58.33   | 11.63 | 11 | 21  | 576  | 63.8  | 6.64 |
| Q64669   | NAD(P)H dehydrogenase (quinone) 1 OS=Mus musculus GN=Nqo1 PE=1 SV=3 - [NQO1_MOUSE]                                    | 25.18 | 1 | 7  | 7  | 24  | 0.661 | 1.425 | 0.840 | 1.223 | 76.28   | 25.18 | 13 | 24  | 274  | 30.9  | 8.72 |
| P56528   | ADP-ribosyl cyclase 1 OS=Mus musculus GN=Cd38 PE=1 SV=2 - [CD38_MOUSE]                                                | 15.13 | 1 | 5  | 5  | 14  | 1.046 | 0.436 | 0.639 | 1.223 | 47.40   | 15.13 | 8  | 14  | 304  | 34.4  | 8.29 |
| Q80VR3   | Sulfotransferase 1C1 OS=Mus musculus GN=Sult1c1 PE=1 SV=1 - [ST1C1_MOUSE]                                             | 5.26  | 1 | 1  | 1  | 1   | 0.763 | 0.251 | 1.714 | 1.223 | 2.56    | 5.26  | 1  | 1   | 304  | 35.8  | 6.96 |
| Q6P9S1   | ATM interactor OS=Mus musculus GN=Atmin PE=2 SV=2 - [ATMIN_MOUSE]                                                     | 3.30  | 1 | 2  | 2  | 5   | 1.737 | 0.830 | 1.407 | 1.223 | 6.71    | 3.30  | 4  | 5   | 818  | 87.4  | 5.64 |
| Q9D186   | Apolipoprotein O OS=Mus musculus GN=ApoO PE=2 SV=1 - [Q9D186_MOUSE]                                                   | 12.80 | 3 | 2  | 2  | 11  | 0.753 | 1.124 | 1.191 | 1.223 | 35.60   | 12.80 | 3  | 11  | 164  | 18.8  | 8.37 |
| E9Q1Y3   | Apolipoprotein B-100 (Fragment) OS=Mus musculus GN=ApoB PE=2 SV=1 - [E9Q1Y3_MOUSE]                                    | 2.36  | 4 | 7  | 8  | 18  | 1.382 | 1.222 | 0.874 | 1.223 | 36.80   | 2.36  | 13 | 18  | 4456 | 503.6 | 6.83 |



|          |                                                                                                               |       |   |    |     |     |        |       |       |       |         |       |     |     |      |       |      |
|----------|---------------------------------------------------------------------------------------------------------------|-------|---|----|-----|-----|--------|-------|-------|-------|---------|-------|-----|-----|------|-------|------|
| D3YZN4   | Paraplegin OS=Mus musculus GN=Spg7 PE=2 SV=1 - [D3YZN4_MOUSE]                                                 | 35.06 | 8 | 17 | 17  | 37  | 0.755  | 1.081 | 1.019 | 1.223 | 109.06  | 35.06 | 24  | 37  | 676  | 75.0  | 7.40 |
| Q9CQX0   | Ubiquitin thioesterase OTUB2 OS=Mus musculus GN=Otub2 PE=2 SV=1 - [OTUB2_MOUSE]                               | 14.10 | 3 | 2  | 3   | 6   | 2.005  | 1.332 | 1.085 | 1.223 | 10.78   | 14.10 | 5   | 6   | 234  | 27.3  | 6.28 |
| Q4FZD7   | Inactive serine/threonine-protein kinase PLK5 OS=Mus musculus GN=Plk5 PE=1 SV=1 - [PLK5_MOUSE]                | 2.18  | 2 | 1  | 1   | 1   | 1.239  | 0.724 | 1.572 | 1.223 | 2.34    | 2.18  | 1   | 1   | 595  | 66.0  | 9.50 |
| A6H611   | Mitochondrial intermediate peptidase OS=Mus musculus GN=Mipep PE=2 SV=1 - [MPEP_MOUSE]                        | 19.69 | 1 | 12 | 12  | 29  | 0.714  | 1.078 | 1.068 | 1.224 | 75.77   | 19.69 | 19  | 29  | 711  | 80.8  | 7.15 |
| Q61581   | Insulin-like growth factor-binding protein 7 OS=Mus musculus GN=Igfbp7 PE=2 SV=3 - [IGBP7_MOUSE]              | 13.52 | 3 | 4  | 4   | 14  | 1.505  | 0.814 | 1.170 | 1.224 | 35.79   | 13.52 | 8   | 14  | 281  | 29.0  | 8.31 |
| Q9D3A9   | Protein tweety homolog 1 OS=Mus musculus GN=Ttyh1 PE=1 SV=1 - [TTYH1_MOUSE]                                   | 15.56 | 6 | 7  | 7   | 56  | 0.582  | 1.307 | 1.125 | 1.224 | 166.56  | 15.56 | 11  | 56  | 450  | 49.0  | 5.03 |
| Q8JZX9   | Cdc42 effector protein 2 OS=Mus musculus GN=Cdc42ep2 PE=1 SV=1 - [BORGI_MOUSE]                                | 27.10 | 1 | 4  | 4   | 14  | 1.996  | 1.191 | 1.335 | 1.224 | 49.04   | 27.10 | 6   | 14  | 214  | 23.0  | 5.54 |
| O88712-2 | Isoform 2 of C-terminal-binding protein 1 OS=Mus musculus GN=Ctbp1 - [CTBP1_MOUSE]                            | 43.02 | 3 | 9  | 13  | 89  | 0.688  | 1.352 | 1.306 | 1.224 | 292.59  | 43.02 | 25  | 89  | 430  | 46.6  | 6.65 |
| P99029-2 | Isoform Cytoplasmic+peroxisomal of Peroxiredoxin-5, mitochondrial OS=Mus musculus GN=Prdx5 - [PRDX5_MOUSE]    | 74.69 | 4 | 13 | 13  | 350 | 1.402  | 1.158 | 1.193 | 1.224 | 1155.88 | 74.69 | 25  | 350 | 162  | 17.0  | 7.87 |
| P70248   | Unconventional myosin-Ib OS=Mus musculus GN=Myo1f PE=1 SV=1 - [MYO1F_MOUSE]                                   | 4.19  | 3 | 3  | 3   | 3   | 1.203  | 1.003 | 0.836 | 1.224 | 6.68    | 4.19  | 3   | 3   | 1099 | 125.9 | 8.92 |
| P12815   | Programmed cell death protein 6 OS=Mus musculus GN=Pdc6 PE=1 SV=2 - [PDC6_MOUSE]                              | 47.12 | 1 | 7  | 7   | 41  | 0.760  | 1.339 | 1.105 | 1.225 | 133.38  | 47.12 | 13  | 41  | 191  | 21.9  | 5.40 |
| P46460   | Vesicle-fusing ATPase OS=Mus musculus GN=Nsf PE=1 SV=2 - [NSF_MOUSE]                                          | 70.56 | 3 | 48 | 48  | 771 | 0.677  | 1.285 | 1.252 | 1.225 | 2074.57 | 70.56 | 82  | 771 | 744  | 82.6  | 6.95 |
| D3YWM6   | Uncharacterized protein OS=Mus musculus GN=Ces2d-ps PE=4 SV=1 - [D3YWM6_MOUSE]                                | 3.58  | 3 | 2  | 2   | 2   | 1.302  | 0.733 | 1.022 | 1.225 | 4.08    | 3.58  | 2   | 2   | 558  | 62.2  | 5.88 |
| F8VQ40   | Laminin subunit alpha-1 OS=Mus musculus GN=Lama1 PE=4 SV=1 - [F8VQ40_MOUSE]                                   | 10.22 | 2 | 27 | 27  | 59  | 1.168  | 1.423 | 1.051 | 1.225 | 160.67  | 10.22 | 43  | 59  | 3083 | 337.9 | 6.71 |
| Q99JW2   | Aminoacylase-1 OS=Mus musculus GN=Acyl1 PE=1 SV=1 - [ACY1_MOUSE]                                              | 27.70 | 1 | 10 | 10  | 23  | 1.934  | 1.161 | 1.102 | 1.226 | 76.35   | 27.70 | 17  | 23  | 408  | 45.8  | 6.32 |
| J3QK48   | Acyl-protein thioesterase 1 (Fragment) OS=Mus musculus GN=Lypla1 PE=4 SV=1 - [J3QK48_MOUSE]                   | 32.73 | 7 | 6  | 6   | 36  | 0.906  | 1.131 | 1.074 | 1.226 | 102.34  | 32.73 | 10  | 36  | 220  | 23.2  | 6.77 |
| O70400   | PDZ and LIM domain protein 1 OS=Mus musculus GN=Pdlim1 PE=2 SV=4 -                                            | 44.04 | 1 | 11 | 11  | 49  | 1.454  | 2.219 | 1.548 | 1.226 | 135.10  | 44.04 | 21  | 49  | 327  | 35.8  | 6.84 |
| F8VFX2   | Protein Fbxw9 OS=Mus musculus GN=Fbxw9 PE=2 SV=1 - [F8VFX2_MOUSE]                                             | 4.15  | 1 | 2  | 2   | 3   | 0.790  | 1.004 | 1.070 | 1.226 | 10.31   | 4.15  | 3   | 3   | 458  | 50.5  | 6.90 |
| POCIQ2   | Dual 3',5'-cyclic-AMP and -GMP phosphodiesterase 11A OS=Mus musculus GN=Pde11a PE=1 SV=1 - [PDE11_MOUSE]      | 7.40  | 1 | 4  | 4   | 8   | 0.688  | 1.444 | 1.218 | 1.226 | 23.13   | 7.40  | 6   | 8   | 933  | 104.5 | 6.43 |
| Q61493   | DNA polymerase zeta catalytic subunit OS=Mus musculus GN=Rev3l PE=1 SV=3 - [DPOLZ_MOUSE]                      | 0.38  | 1 | 1  | 1   | 1   | 1.539  | 1.156 | 0.958 | 1.226 | 2.33    | 0.38  | 1   | 1   | 3122 | 350.5 | 8.32 |
| P15508   | Spectrin beta chain, erythrocytic OS=Mus musculus GN=Sptb PE=1 SV=4 - [SPTB1_MOUSE]                           | 55.69 | 1 | 2  | 103 | 407 | 2.050  | 1.853 | 1.067 | 1.227 | 1298.93 | 55.69 | 182 | 407 | 2128 | 245.1 | 5.33 |
| Q9QZM4   | F-box only protein 6 OS=Mus musculus GN=Fbxo6 PE=1 SV=1 - [FBX6_MOUSE]                                        | 29.49 | 3 | 7  | 7   | 19  | 1.102  | 1.196 | 1.014 | 1.227 | 56.39   | 29.49 | 13  | 19  | 295  | 34.5  | 8.18 |
| D3Z553   | Protein Churchill OS=Mus musculus GN=Churc1 PE=2 SV=1 - [D3Z553_MOUSE]                                        | 37.14 | 2 | 1  | 1   | 1   | 7.813  | 3.158 | 1.399 | 1.228 | 3.23    | 37.14 | 1   | 1   | 35   | 4.1   | 4.08 |
| Q3TG86   | Cytochrome P450, family 11, subfamily b, polypeptide 1 OS=Mus musculus GN=Cyp11b1 PE=2 SV=1 - [CYP11B1_MOUSE] | 9.38  | 1 | 2  | 2   | 2   | 12.085 | 2.162 | 1.613 | 1.228 | 4.59    | 9.38  | 2   | 2   | 501  | 57.7  | 9.38 |
| Q8VCT4   | Carboxylesterase 1D OS=Mus musculus GN=Ces1d PE=1 SV=1 - [CES1D_MOUSE]                                        | 10.80 | 1 | 3  | 5   | 19  | 1.319  | 0.846 | 0.692 | 1.228 | 49.78   | 10.80 | 9   | 19  | 565  | 61.7  | 6.61 |

|          |                                                                                                                           |       |     |    |     |      |       |       |       |       |          |       |     |      |      |       |       |
|----------|---------------------------------------------------------------------------------------------------------------------------|-------|-----|----|-----|------|-------|-------|-------|-------|----------|-------|-----|------|------|-------|-------|
| Q8BPX9   | Solute carrier family 15 member 3 OS=Mus musculus GN=Slc15a3 PE=2 SV=1 -                                                  | 1.90  | 1   | 1  | 1   | 1    | 0.819 | 1.246 | 1.061 | 1.228 | 2.01     | 1.90  | 1   | 1    | 578  | 64.0  | 8.81  |
| F8VFN2   | Protein Tex15 OS=Mus musculus GN=Tex15 PE=2 SV=1 - [F8VFN2_MOUSE]                                                         | 0.86  | 1   | 2  | 3   | 4    | 2.042 | 1.422 | 0.962 | 1.228 | 9.85     | 0.86  | 3   | 4    | 2785 | 311.1 | 6.39  |
| F6Q8C0   | Apoptotic chromatin condensation inducer in the nucleus (Fragment) OS=Mus musculus GN=Acin1 PE=4 SV=1 - [F6Q8C0_MOUSE]    | 21.28 | 1   | 1  | 2   | 5    | 1.179 | 1.091 | 1.455 | 1.228 | 12.79    | 21.28 | 3   | 5    | 141  | 16.7  | 10.55 |
| Q03391   | Glutamate receptor ionotropic, NMDA 2D OS=Mus musculus GN=Grin2d PE=1 SV=3 - [NMDE4_MOUSE]                                | 13.45 | 2   | 11 | 12  | 33   | 1.181 | 0.639 | 0.843 | 1.228 | 95.91    | 13.45 | 20  | 33   | 1323 | 142.9 | 8.37  |
| Q5PPQ4   | Protein Zfp658 OS=Mus musculus GN=Zfp658 PE=2 SV=1 - [Q5PPQ4_MOUSE]                                                       | 4.62  | 145 | 1  | 2   | 6    | 2.306 | 1.631 | 0.915 | 1.228 | 2.26     | 4.62  | 2   | 6    | 887  | 101.4 | 9.19  |
| P12382   | 6-phosphofructokinase, liver type OS=Mus musculus GN=Pfkfb1 PE=1 SV=4 - [K6PL_MOUSE]                                      | 41.15 | 2   | 21 | 29  | 223  | 1.050 | 1.422 | 1.138 | 1.228 | 683.67   | 41.15 | 57  | 223  | 780  | 85.3  | 7.17  |
| Q8BK7    | THO complex subunit 5 homolog OS=Mus musculus GN=Thoc5 PE=1 SV=2 - [THOCS_MOUSE]                                          | 7.03  | 3   | 4  | 5   | 9    | 0.805 | 1.056 | 0.831 | 1.228 | 17.61    | 7.03  | 7   | 9    | 683  | 78.6  | 7.12  |
| Q9Z1R4   | Uncharacterized protein C6orf47 homolog OS=Mus musculus GN=D17h653e PE=2 SV=1 - [CF047_MOUSE]                             | 12.29 | 1   | 4  | 4   | 11   | 0.792 | 0.754 | 1.084 | 1.228 | 35.28    | 12.29 | 8   | 11   | 293  | 32.0  | 6.89  |
| Q8CEC6   | Peptidylprolyl isomerase domain and WD repeat-containing protein 1 OS=Mus musculus GN=Ppwi1 PE=2 SV=2 - [Ppwi1_MOUSE]     | 3.10  | 1   | 2  | 2   | 3    | 0.880 | 0.770 | 1.202 | 1.228 | 8.36     | 3.10  | 3   | 3    | 646  | 73.3  | 7.15  |
| P97441   | Zinc transporter 3 OS=Mus musculus GN=Slc30a3 PE=1 SV=1 - [ZNT3_MOUSE]                                                    | 16.75 | 1   | 7  | 7   | 45   | 0.768 | 5.787 | 3.971 | 1.229 | 125.14   | 16.75 | 14  | 45   | 388  | 41.8  | 6.38  |
| Q64018   | Glycine receptor subunit alpha-1 OS=Mus musculus GN=Gria1 PE=1 SV=2 - [GLRA1_MOUSE]                                       | 15.10 | 3   | 4  | 5   | 15   | 1.424 | 0.642 | 1.061 | 1.229 | 27.68    | 15.10 | 8   | 15   | 457  | 52.6  | 8.90  |
| Q9D1X8   | Tetraspanin 2, isoform CRA_b OS=Mus musculus GN=Tspan2 PE=2 SV=1 - [Q9D1X8_MOUSE]                                         | 15.21 | 2   | 2  | 3   | 32   | 1.297 | 0.791 | 1.253 | 1.229 | 91.53    | 15.21 | 6   | 32   | 217  | 23.4  | 8.00  |
| Q9CYT6   | Adenylyl cyclase-associated protein 2 OS=Mus musculus GN=Cap2 PE=1 SV=1 - [CAP2_MOUSE]                                    | 52.73 | 2   | 21 | 23  | 146  | 0.870 | 1.755 | 1.550 | 1.229 | 397.66   | 52.73 | 41  | 146  | 476  | 52.8  | 6.43  |
| A2APY7   | NADH dehydrogenase [ubiquinone] 1 alpha subcomplex assembly factor 5 OS=Mus musculus GN=Ndufaf5 PE=2 SV=1 - [NDUF5_MOUSE] | 21.87 | 2   | 7  | 7   | 16   | 1.143 | 1.249 | 1.254 | 1.229 | 50.60    | 21.87 | 12  | 16   | 343  | 38.4  | 6.10  |
| Q03311   | Cholinesterase OS=Mus musculus GN=Bche PE=2 SV=2 - [CHLE_MOUSE]                                                           | 6.63  | 1   | 3  | 3   | 5    | 1.135 | 0.663 | 1.070 | 1.229 | 9.34     | 6.63  | 4   | 5    | 603  | 68.4  | 7.25  |
| Q9Z1M0   | P2X purinoceptor 7 OS=Mus musculus GN=P2rx7 PE=1 SV=2 - [P2RX7_MOUSE]                                                     | 15.63 | 3   | 9  | 9   | 27   | 0.877 | 0.740 | 1.035 | 1.229 | 72.69    | 15.63 | 15  | 27   | 595  | 68.3  | 8.22  |
| O54827   | Probable phospholipid-transporting ATPase VA OS=Mus musculus GN=Atp10a PE=1 SV=4 - [AT10A_MOUSE]                          | 2.06  | 1   | 2  | 2   | 2    | 1.277 | 1.025 | 1.140 | 1.229 | 6.55     | 2.06  | 2   | 2    | 1508 | 168.7 | 6.67  |
| E9PYK8   | Rho guanine nucleotide exchange factor 4 OS=Mus musculus GN=Arhgef4 PE=2 SV=2 - [E9PYK8_MOUSE]                            | 8.46  | 8   | 8  | 11  | 23   | 1.960 | 0.808 | 1.247 | 1.229 | 69.15    | 8.46  | 15  | 23   | 1855 | 206.2 | 6.52  |
| P68373   | Tubulin alpha-1C chain OS=Mus musculus GN=Tuba1c PE=1 SV=1 - [TBA1C_MOUSE]                                                | 61.25 | 1   | 7  | 28  | 3586 | 1.108 | 1.370 | 1.100 | 1.230 | 11123.93 | 61.25 | 54  | 3586 | 449  | 49.9  | 5.10  |
| Q8BKK4-3 | Isoform 3 of Protein phosphatase 1 regulatory subunit 1C OS=Mus musculus GN=Ppp1r1c - [PPR1C_MOUSE]                       | 15.38 | 2   | 2  | 2   | 3    | 2.612 | 0.823 | 2.499 | 1.230 | 6.13     | 15.38 | 2   | 3    | 91   | 10.4  | 9.63  |
| Q14880   | Potassium voltage-gated channel subfamily C member 2 OS=Mus musculus GN=Kcnc2 PE=1 SV=1 - [KCNC2_MOUSE]                   | 13.55 | 2   | 5  | 7   | 12   | 0.660 | 0.463 | 1.339 | 1.230 | 44.74    | 13.55 | 11  | 12   | 642  | 70.5  | 7.69  |
| Q3UY51   | Leucine-rich repeat-containing protein 55 OS=Mus musculus GN=Lrrc55 PE=2 SV=1 - [LRCS5_MOUSE]                             | 3.22  | 1   | 1  | 1   | 2    | 0.335 | 0.464 | 1.006 | 1.230 | 5.17     | 3.22  | 2   | 2    | 311  | 34.4  | 6.39  |
| Q68FD5   | Clathrin heavy chain 1 OS=Mus musculus GN=Ctcc PE=1 SV=3 - [CLH1_MOUSE]                                                   | 76.36 | 2   | 96 | 107 | 2314 | 0.695 | 1.286 | 1.202 | 1.231 | 6669.61  | 76.36 | 194 | 2314 | 1675 | 191.4 | 5.69  |
| Q9JJA4   | Ribosome biogenesis protein WDR12 OS=Mus musculus GN=Wdr12 PE=2 SV=1 - [WDR12_MOUSE]                                      | 16.78 | 1   | 5  | 5   | 10   | 1.620 | 0.974 | 1.173 | 1.231 | 28.59    | 16.78 | 7   | 10   | 423  | 47.3  | 5.60  |

|          |                                                                                                                   |       |   |    |    |     |       |       |       |       |         |       |    |     |      |       |      |
|----------|-------------------------------------------------------------------------------------------------------------------|-------|---|----|----|-----|-------|-------|-------|-------|---------|-------|----|-----|------|-------|------|
| Q9D6R2   | Isocitrate dehydrogenase [NAD] subunit alpha, mitochondrial OS=Mus musculus GN=Iidh3a PE=1 SV=1 - [IDH3A_MOUSE]   | 54.37 | 2 | 23 | 23 | 294 | 0.990 | 1.209 | 1.091 | 1.231 | 777.01  | 54.37 | 44 | 294 | 366  | 39.6  | 6.73 |
| E9Q9D5   | Protein Rab12 OS=Mus musculus GN=Rab12 PE=2 SV=1 - [E9Q9D5_MOUSE]                                                 | 21.97 | 7 | 3  | 4  | 4   | 1.019 | 0.789 | 1.221 | 1.231 | 11.11   | 21.97 | 4  | 4   | 223  | 25.6  | 5.66 |
| Q7TT28   | RNA exonuclease 1 homolog OS=Mus musculus GN=Rexo1 PE=1 SV=1 - [REXO1_MOUSE]                                      | 0.74  | 1 | 1  | 1  | 1   | 1.401 | 1.599 | 1.390 | 1.231 | 1.79    | 0.74  | 1  | 1   | 1213 | 130.7 | 8.97 |
| O35988   | Syndecan-4 OS=Mus musculus GN=Sdc4 PE=1 SV=1 - [SDC4_MOUSE]                                                       | 14.14 | 1 | 2  | 2  | 11  | 1.311 | 1.251 | 1.514 | 1.231 | 18.74   | 14.14 | 3  | 11  | 198  | 21.5  | 4.41 |
| Q6PD19   | UPF0668 protein C10orf76 homolog OS=Mus musculus PE=2 SV=2 - [C1076_MOUSE]                                        | 14.22 | 3 | 7  | 7  | 12  | 0.907 | 1.166 | 0.936 | 1.231 | 39.41   | 14.22 | 12 | 12  | 689  | 78.6  | 6.60 |
| Q3UYC0   | Protein phosphatase 1H OS=Mus musculus GN=Ppm1h PE=1 SV=1 - [PPM1H_MOUSE]                                         | 38.21 | 3 | 15 | 17 | 81  | 0.755 | 1.401 | 1.382 | 1.231 | 245.75  | 38.21 | 32 | 81  | 513  | 56.3  | 6.73 |
| P62874   | Guanine nucleotide-binding protein G(I)/G(S)/G(T) subunit beta-1 OS=Mus musculus GN=Gnb1 PE=1 SV=3 - [GNB1_MOUSE] | 59.41 | 3 | 8  | 15 | 387 | 0.630 | 1.250 | 1.173 | 1.231 | 1221.49 | 59.41 | 28 | 387 | 340  | 37.4  | 6.00 |
| Q9Z0E0   | Neurochondrin OS=Mus musculus GN=Ncdn PE=1 SV=1 - [NCDN_MOUSE]                                                    | 47.87 | 1 | 1  | 28 | 204 | 0.787 | 0.915 | 1.349 | 1.231 | 605.01  | 47.87 | 50 | 204 | 729  | 78.8  | 5.54 |
| Q09LZ8-2 | Isoform 2 of Cytosolic carboxypeptidase 6 OS=Mus musculus GN=Agb4 - [CBPC5_MOUSE]                                 | 9.07  | 7 | 4  | 4  | 11  | 0.808 | 1.111 | 1.117 | 1.232 | 27.56   | 9.07  | 7  | 11  | 463  | 53.9  | 8.43 |
| Q9JMI0   | Endothelin-converting enzyme-like 1 OS=Mus musculus GN=Ecel1 PE=2 SV=2 - [ECEL1_MOUSE]                            | 12.39 | 1 | 10 | 10 | 20  | 1.488 | 1.299 | 0.769 | 1.232 | 60.91   | 12.39 | 17 | 20  | 775  | 87.9  | 7.80 |
| J3QMF0   | Protein Gm5709 OS=Mus musculus GN=Gm5709 PE=4 SV=1 - [J3QMF0_MOUSE]                                               | 6.48  | 3 | 2  | 2  | 2   | 0.653 | 1.195 | 0.916 | 1.232 | 2.63    | 6.48  | 2  | 2   | 401  | 46.1  | 8.69 |
| Q69ZB8-2 | Isoform 2 of Zinc finger CCHC domain-containing protein 2 OS=Mus musculus GN=Zchc2 - [ZCHC2_MOUSE]                | 2.68  | 2 | 1  | 1  | 1   | 2.437 | 0.984 | 1.018 | 1.232 | 2.20    | 2.68  | 1  | 1   | 1155 | 123.2 | 6.95 |
| Q9D1H9   | Microfibril-associated glycoprotein 4 OS=Mus musculus GN=Mfap4 PE=1 SV=1 - [MFAP4_MOUSE]                          | 7.78  | 2 | 1  | 1  | 1   | 1.424 | 1.110 | 1.240 | 1.232 | 2.48    | 7.78  | 1  | 1   | 257  | 28.9  | 5.44 |
| E9Q828   | Protein Atp2b4 OS=Mus musculus GN=Atp2b4 PE=2 SV=1 - [E9Q828_MOUSE]                                               | 39.93 | 3 | 6  | 45 | 331 | 0.651 | 2.765 | 1.487 | 1.232 | 921.11  | 39.93 | 74 | 331 | 1172 | 129.2 | 6.73 |
| Q8BZ20   | Poly [ADP-ribose] polymerase 12 OS=Mus musculus GN=Parp12 PE=2 SV=3 - [Q8BZ20_MOUSE]                              | 4.36  | 1 | 2  | 2  | 4   | 1.283 | 1.446 | 0.851 | 1.232 | 13.51   | 4.36  | 2  | 4   | 711  | 79.9  | 8.54 |
| E9Q8M8   | Mineralocorticoid receptor OS=Mus musculus GN=Nr3c2 PE=2 SV=1 - [E9Q8M8_MOUSE]                                    | 5.28  | 7 | 2  | 3  | 3   | 1.160 | 1.124 | 1.346 | 1.232 | 6.90    | 5.28  | 3  | 3   | 984  | 107.0 | 7.87 |
| Q8CFK6   | DENN domain-containing protein 1C OS=Mus musculus GN=Dennd1c PE=2 SV=1 - [Q8CFK6_MOUSE]                           | 2.80  | 1 | 2  | 2  | 2   | 1.336 | 1.021 | 1.585 | 1.232 | 5.22    | 2.80  | 2  | 2   | 786  | 86.6  | 5.96 |
| F2Z461   | E3 ISG15--protein ligase Herc6 OS=Mus musculus GN=Herc6 PE=2 SV=1 - [HERC6_MOUSE]                                 | 1.79  | 1 | 2  | 2  | 2   | 1.051 | 1.156 | 1.165 | 1.232 | 3.65    | 1.79  | 2  | 2   | 1003 | 112.9 | 7.52 |
| Q6NV72-2 | Isoform 2 of WD repeat-containing protein C2orf44 homolog OS=Mus musculus - [Q6NV72-2_MOUSE]                      | 5.04  | 2 | 3  | 3  | 6   | 1.066 | 0.834 | 1.241 | 1.233 | 6.15    | 5.04  | 5  | 6   | 635  | 69.2  | 7.65 |
| Q8BSM7   | Large neutral amino acids transporter small subunit 3 OS=Mus musculus GN=Slc43a1 PE=1 SV=1 - [LAT3_MOUSE]         | 7.62  | 3 | 3  | 3  | 4   | 1.711 | 1.306 | 0.752 | 1.233 | 14.73   | 7.62  | 4  | 4   | 564  | 62.6  | 8.12 |
| Q9DBH0   | NEDD4-like E3 ubiquitin-protein ligase WWP2 OS=Mus musculus GN=Wwp2 PE=1 SV=1 - [WWP2_MOUSE]                      | 12.07 | 1 | 6  | 11 | 18  | 1.071 | 0.912 | 1.066 | 1.233 | 49.83   | 12.07 | 15 | 18  | 870  | 98.7  | 7.11 |
| D3YXX0   | Transmembrane gamma-carboxyglutamic acid protein 2 (Fragment) OS=Mus musculus GN=Prrg2 PE=2 SV=1 - [D3YXX0_MOUSE] | 14.71 | 3 | 1  | 1  | 1   | 1.430 | 1.148 | 1.623 | 1.233 | 2.05    | 14.71 | 1  | 1   | 68   | 7.4   | 8.56 |
| Q14BV6-2 | Isoform 2 of UPF0249 protein y9jC homolog OS=Mus musculus GN=Y9jc - [Y9JC_MOUSE]                                  | 11.07 | 3 | 3  | 3  | 5   | 0.877 | 1.525 | 1.010 | 1.233 | 15.56   | 11.07 | 5  | 5   | 271  | 28.9  | 6.77 |
| Q8BWF0   | Succinate-semialdehyde dehydrogenase, mitochondrial OS=Mus musculus GN=Aldh5a1 PE=1 SV=1 - [ALDH5A1_MOUSE]        | 60.42 | 1 | 27 | 27 | 263 | 0.780 | 0.837 | 1.007 | 1.234 | 812.18  | 60.42 | 47 | 263 | 523  | 55.9  | 8.25 |
| Q99PL6   | UBX domain-containing protein 6 OS=Mus musculus GN=Ubxn6 PE=1 SV=1 - [Q99PL6_MOUSE]                               | 43.21 | 3 | 16 | 16 | 76  | 1.035 | 1.197 | 1.329 | 1.234 | 240.27  | 43.21 | 24 | 76  | 442  | 49.8  | 8.54 |

|          |                                                                                                                 |       |   |    |    |     |       |       |       |       |         |       |    |     |      |       |      |
|----------|-----------------------------------------------------------------------------------------------------------------|-------|---|----|----|-----|-------|-------|-------|-------|---------|-------|----|-----|------|-------|------|
| F8VP06   | Ubiquitin carboxyl-terminal hydrolase OS=Mus musculus GN=Usp9y PE=3 SV=1 - [F8VP06_MOUSE]                       | 7.16  | 5 | 1  | 20 | 75  | 0.994 | 1.430 | 1.009 | 1.234 | 192.41  | 7.16  | 35 | 75  | 2556 | 292.1 | 6.07 |
| O35682   | Myeloid-associated differentiation marker OS=Mus musculus GN=Myadm PE=2 SV=2 - [MYADM_MOUSE]                    | 12.50 | 1 | 3  | 3  | 65  | 0.535 | 0.676 | 1.087 | 1.234 | 241.16  | 12.50 | 6  | 65  | 320  | 35.3  | 8.31 |
| Q91Y78   | Transmembrane protein 63A OS=Mus musculus GN=Tmem63a PE=2 SV=1 - [TM63A_MOUSE]                                  | 6.97  | 3 | 5  | 5  | 21  | 1.300 | 0.246 | 0.940 | 1.234 | 52.51   | 6.97  | 9  | 21  | 804  | 91.8  | 7.93 |
| F6WDS8   | Regulator of G-protein-signaling 6 OS=Mus musculus GN=Rgs6 PE=4 SV=1 - [F6WDS8_MOUSE]                           | 34.21 | 3 | 12 | 15 | 78  | 0.482 | 0.575 | 1.107 | 1.234 | 238.52  | 34.21 | 27 | 78  | 456  | 52.9  | 6.67 |
| Q8R191   | Synaptogyrin-3 OS=Mus musculus GN=Syngr3 PE=1 SV=1 - [SNG3_MOUSE]                                               | 35.81 | 1 | 6  | 6  | 59  | 0.613 | 1.592 | 1.198 | 1.234 | 165.19  | 35.81 | 10 | 59  | 229  | 24.5  | 8.18 |
| Q8K354   | Carbonyl reductase [NADPH] 3 OS=Mus musculus GN=Cbr3 PE=2 SV=1 - [CBR3_MOUSE]                                   | 65.34 | 1 | 13 | 16 | 77  | 1.444 | 1.519 | 1.793 | 1.234 | 228.35  | 65.34 | 29 | 77  | 277  | 30.9  | 6.57 |
| Q9CWF6   | Bardet-Biedl syndrome 2 protein homolog OS=Mus musculus GN=Bbs2 PE=2 SV=1 - [BBS2_MOUSE]                        | 9.71  | 1 | 7  | 7  | 16  | 0.802 | 1.079 | 0.962 | 1.234 | 44.56   | 9.71  | 11 | 16  | 721  | 79.9  | 5.86 |
| P14094   | Sodium/potassium-transporting ATPase subunit beta-1 OS=Mus musculus GN=Atp1b1 PE=1 SV=1 - [ATP1B1_MOUSE]        | 42.43 | 1 | 17 | 17 | 731 | 0.602 | 0.839 | 1.125 | 1.234 | 1957.45 | 42.43 | 32 | 731 | 304  | 35.2  | 8.65 |
| B2RQX9   | Transporter OS=Mus musculus GN=Slc6a5 PE=2 SV=1 - [B2RQX9_MOUSE]                                                | 18.20 | 3 | 9  | 10 | 43  | 3.975 | 0.298 | 0.840 | 1.234 | 146.19  | 18.20 | 18 | 43  | 791  | 87.0  | 7.40 |
| Q3THS6   | S-adenosylmethionine synthase isoform type-2 OS=Mus musculus GN=Mat2a PE=2 SV=2 - [METK2_MOUSE]                 | 46.33 | 1 | 14 | 16 | 103 | 1.077 | 0.911 | 1.122 | 1.234 | 299.30  | 46.33 | 30 | 103 | 395  | 43.7  | 6.48 |
| P19783   | Cytochrome c oxidase subunit 4 isoform 1, mitochondrial OS=Mus musculus GN=Cox4i1 PE=1 SV=2 - [COX4I1_MOUSE]    | 57.99 | 4 | 11 | 11 | 342 | 1.013 | 1.123 | 1.145 | 1.235 | 1012.36 | 57.99 | 22 | 342 | 169  | 19.5  | 9.23 |
| P97364   | Selenide, water dikinase 2 OS=Mus musculus GN=Sephs2 PE=1 SV=3 - [SPS2_MOUSE]                                   | 7.96  | 3 | 3  | 4  | 7   | 0.670 | 1.039 | 1.155 | 1.235 | 13.15   | 7.96  | 5  | 7   | 452  | 47.8  | 6.06 |
| Q61036-2 | Isoform 2 of Serine/threonine-protein kinase PAK 3 OS=Mus musculus GN=Pak3 - [PAK3_MOUSE]                       | 45.40 | 5 | 9  | 24 | 287 | 0.993 | 1.068 | 1.162 | 1.235 | 868.05  | 45.40 | 45 | 287 | 544  | 60.7  | 5.45 |
| Q5PSV9   | Mediator of DNA damage checkpoint protein 1 OS=Mus musculus GN=Mdc1 PE=1 SV=1 - [MDC1_MOUSE]                    | 5.21  | 3 | 6  | 6  | 9   | 1.258 | 0.921 | 1.043 | 1.235 | 22.82   | 5.21  | 9  | 9   | 1707 | 184.6 | 5.19 |
| F6XGJ4   | Protein Gm17093 (Fragment) OS=Mus musculus GN=Gm17093 PE=4 SV=1 - [Gm17093_MOUSE]                               | 9.81  | 1 | 1  | 1  | 2   | 1.313 | 0.937 | 1.240 | 1.235 | 5.25    | 9.81  | 1  | 2   | 214  | 25.0  | 8.34 |
| Q9QY15   | DnaJ homolog subfamily B member 2 OS=Mus musculus GN=Dnajb2 PE=2 SV=2 - [DNJB2_MOUSE]                           | 45.13 | 2 | 10 | 10 | 49  | 1.377 | 0.967 | 1.060 | 1.236 | 136.86  | 45.13 | 18 | 49  | 277  | 30.6  | 4.98 |
| Q80UK7   | Spindle assembly abnormal protein 6 homolog OS=Mus musculus GN=Sas6 PE=2 SV=2 - [SAS6_MOUSE]                    | 5.96  | 2 | 2  | 4  | 11  | 0.903 | 0.910 | 0.889 | 1.236 | 23.00   | 5.96  | 7  | 11  | 654  | 74.0  | 7.37 |
| Q14DN9-2 | Isoform 2 of Ankyrin repeat and death domain-containing protein 1B OS=Mus musculus GN=Ankdd1b - [ANKDD1B_MOUSE] | 1.72  | 3 | 1  | 1  | 2   | 0.628 | 0.844 | 0.716 | 1.236 | 4.72    | 1.72  | 2  | 2   | 465  | 52.1  | 7.31 |
| O88829-2 | Isoform 2 of Lactosylceramide alpha-2,3-sialyltransferase OS=Mus musculus GN=St3gal5 - [ST3GAL5_MOUSE]          | 2.73  | 2 | 1  | 1  | 2   | 0.636 | 1.236 | 1.179 | 1.236 | 9.99    | 2.73  | 2  | 2   | 403  | 46.1  | 8.28 |
| Q9Z210   | LETM1 and EF-hand domain-containing protein 1, mitochondrial OS=Mus musculus GN=Letm1 PE=2 SV=1 - [LETM1_MOUSE] | 47.43 | 1 | 35 | 35 | 143 | 0.728 | 1.277 | 1.250 | 1.236 | 414.57  | 47.43 | 57 | 143 | 738  | 82.9  | 6.52 |
| A2RSX7   | tRNA wybutosine-synthesizing protein 5 OS=Mus musculus GN=Tyw5 PE=2 SV=2 - [TYW5_MOUSE]                         | 8.25  | 1 | 1  | 2  | 3   | 0.613 | 0.992 | 1.109 | 1.237 | 10.34   | 8.25  | 2  | 3   | 315  | 36.6  | 6.34 |
| P70181   | Phosphatidylinositol 4-phosphate 5-kinase type-1 beta OS=Mus musculus GN=Pip5k1b PE=1 SV=1 - [PIS1B_MOUSE]      | 16.33 | 2 | 4  | 6  | 18  | 1.364 | 1.687 | 1.022 | 1.237 | 52.02   | 16.33 | 10 | 18  | 539  | 60.8  | 6.86 |
| Q61327   | Sodium-dependent dopamine transporter OS=Mus musculus GN=Slc6a3 PE=1 SV=2 - [SLC6A3_MOUSE]                      | 6.14  | 1 | 3  | 4  | 16  | 0.836 | 0.438 | 3.812 | 1.237 | 37.04   | 6.14  | 8  | 16  | 619  | 68.8  | 7.21 |

|          |                                                                                                                                                   |       |    |    |    |      |       |       |       |       |         |       |    |      |      |       |       |
|----------|---------------------------------------------------------------------------------------------------------------------------------------------------|-------|----|----|----|------|-------|-------|-------|-------|---------|-------|----|------|------|-------|-------|
| Q3TWN3-2 | Isoform 2 of Metal transporter CNNM2 OS=Mus musculus GN=Cnm2 -                                                                                    | 30.83 | 2  | 13 | 20 | 49   | 0.623 | 0.739 | 0.888 | 1.237 | 133.71  | 30.83 | 30 | 49   | 853  | 94.4  | 6.14  |
| Q8R5M8-4 | Isoform 4 of Cell adhesion molecule 1 OS=Mus musculus GN=Cadm1 - [CADM1_MOUSE]                                                                    | 42.45 | 9  | 13 | 13 | 77   | 0.724 | 2.020 | 1.409 | 1.237 | 268.21  | 42.45 | 23 | 77   | 417  | 45.8  | 5.12  |
| Q8VCK3   | Tubulin gamma-2 chain OS=Mus musculus GN=Tubg2 PE=1 SV=1 - [TUBG2_MOUSE]                                                                          | 36.81 | 1  | 1  | 14 | 52   | 0.588 | 1.360 | 1.013 | 1.237 | 167.04  | 36.81 | 24 | 52   | 451  | 51.1  | 6.21  |
| P56382   | ATP synthase subunit epsilon, mitochondrial OS=Mus musculus GN=Atp5e PE=2 SV=2 - [ATP5E_MOUSE]                                                    | 42.31 | 1  | 3  | 3  | 18   | 1.296 | 0.714 | 1.136 | 1.238 | 38.96   | 42.31 | 5  | 18   | 52   | 5.8   | 10.01 |
| Q62172   | RalA-binding protein 1 OS=Mus musculus GN=Ralbp1 PE=1 SV=4 - [RBP1_MOUSE]                                                                         | 19.14 | 3  | 14 | 14 | 43   | 0.896 | 1.135 | 1.199 | 1.238 | 116.50  | 19.14 | 22 | 43   | 648  | 75.0  | 5.92  |
| Q701V5-2 | Isoform 2 of Synemin OS=Mus musculus GN=Synm - [SYNEM_MOUSE]                                                                                      | 22.00 | 3  | 19 | 21 | 64   | 1.172 | 1.621 | 0.809 | 1.238 | 188.40  | 22.00 | 34 | 64   | 1259 | 140.8 | 5.15  |
| P97952   | Sodium channel subunit beta-1 OS=Mus musculus GN=Scn1b PE=2 SV=1 - [SCN1B_MOUSE]                                                                  | 30.73 | 1  | 5  | 5  | 22   | 1.225 | 1.976 | 1.510 | 1.238 | 71.92   | 30.73 | 9  | 22   | 218  | 24.6  | 4.83  |
| M0QWP1   | Agrin OS=Mus musculus GN=Agm PE=4 SV=1 - [M0QWP1_MOUSE]                                                                                           | 22.71 | 2  | 4  | 35 | 121  | 1.733 | 1.066 | 1.265 | 1.238 | 361.81  | 22.71 | 62 | 121  | 2034 | 216.5 | 6.15  |
| Q9CQC7   | NADH dehydrogenase [ubiquinone] 1 beta subcomplex subunit 4 OS=Mus musculus GN=Ndufb4 PE=1 SV=3 - [NDUFB4_MOUSE]                                  | 51.16 | 2  | 5  | 6  | 56   | 0.602 | 0.866 | 1.095 | 1.238 | 159.44  | 51.16 | 11 | 56   | 129  | 15.1  | 9.89  |
| P63328   | Serine/threonine-protein phosphatase 2B catalytic subunit alpha isoform OS=Mus musculus GN=Ppp3ca PE=1 SV=1 - [PP2BA_MOUSE]                       | 44.34 | 1  | 1  | 20 | 365  | 1.417 | 1.695 | 1.829 | 1.239 | 982.08  | 44.34 | 37 | 365  | 521  | 58.6  | 5.86  |
| Q9JJP9   | Signal peptide peptidase-like 2A OS=Mus musculus GN=Spp2a PE=1 SV=2 - [SPP2A_MOUSE]                                                               | 1.91  | 1  | 1  | 1  | 2    | 1.631 | 1.196 | 0.967 | 1.239 | 5.52    | 1.91  | 1  | 2    | 523  | 58.1  | 7.06  |
| Q9D6K5   | Synaptotagmin-2-binding protein OS=Mus musculus GN=Synj2bp PE=1 SV=1 - [SYJ2B_MOUSE]                                                              | 57.93 | 6  | 1  | 6  | 47   | 1.091 | 0.987 | 1.042 | 1.239 | 127.58  | 57.93 | 11 | 47   | 145  | 15.8  | 6.30  |
| Q3V132   | ADP/ATP translocase 4 OS=Mus musculus GN=Slc25a31 PE=2 SV=1 - [ADT4_MOUSE]                                                                        | 24.38 | 1  | 5  | 10 | 256  | 0.590 | 1.023 | 0.959 | 1.239 | 679.56  | 24.38 | 17 | 256  | 320  | 35.2  | 9.58  |
| P97817   | Cerebellar degeneration-related protein 2 OS=Mus musculus GN=Cdr2 PE=1 SV=2 - [CDR2_MOUSE]                                                        | 9.45  | 1  | 3  | 3  | 5    | 2.137 | 1.470 | 1.392 | 1.240 | 6.48    | 9.45  | 3  | 5    | 455  | 52.1  | 5.00  |
| Q61361   | Brevican core protein OS=Mus musculus GN=Bcan PE=1 SV=2 - [PGCB_MOUSE]                                                                            | 35.90 | 1  | 30 | 31 | 284  | 1.669 | 1.050 | 1.131 | 1.240 | 811.76  | 35.90 | 55 | 284  | 883  | 95.8  | 4.93  |
| H3BK50   | Serine/threonine-protein phosphatase 2A 65 kDa regulatory subunit A beta isoform (Fragment) OS=Mus musculus GN=Ppp2r1b PE=2 SV=1 - [H3BK50_MOUSE] | 35.48 | 1  | 1  | 2  | 4    | 0.737 | 1.298 | 1.178 | 1.240 | 14.22   | 35.48 | 4  | 4    | 93   | 10.2  | 8.51  |
| Q8CCB5   | Methyltransferase-like protein 24 OS=Mus musculus GN=Mettl24 PE=2 SV=1 -                                                                          | 6.34  | 1  | 2  | 2  | 2    | 1.187 | 1.779 | 0.885 | 1.240 | 0.00    | 6.34  | 2  | 2    | 363  | 40.6  | 9.33  |
| P13707   | Glycerol-3-phosphate dehydrogenase [NAD(+)], cytoplasmic OS=Mus musculus GN=Gpd1 PE=1 SV=3 - [GPDA_MOUSE]                                         | 74.50 | 2  | 23 | 25 | 106  | 0.978 | 0.627 | 1.294 | 1.240 | 291.28  | 74.50 | 47 | 106  | 349  | 37.5  | 7.17  |
| E9QNR6   | Protein AI837181 OS=Mus musculus GN=AI837181 PE=2 SV=1 - [E9QNR6_MOUSE]                                                                           | 43.62 | 2  | 11 | 11 | 45   | 1.036 | 0.996 | 1.127 | 1.240 | 131.73  | 43.62 | 20 | 45   | 298  | 31.8  | 6.10  |
| J3QM67   | Protein LOC100040083 OS=Mus musculus GN=Gm20825 PE=4 SV=1 - [J3QM67_MOUSE]                                                                        | 7.05  | 11 | 1  | 1  | 1    | 1.037 | 0.828 | 1.123 | 1.241 | 2.65    | 7.05  | 1  | 1    | 227  | 25.7  | 8.44  |
| G3X9P9   | MGI1048453 OS=Mus musculus GN=AF366264 PE=4 SV=1 - [G3X9P9_MOUSE]                                                                                 | 7.37  | 2  | 2  | 2  | 2    | 2.161 | 1.263 | 1.056 | 1.241 | 4.86    | 7.37  | 2  | 2    | 502  | 57.0  | 7.64  |
| Q9EPK2-3 | Isoform 3 of Protein XRP2 OS=Mus musculus GN=Rp2 - [XRP2_MOUSE]                                                                                   | 21.43 | 4  | 7  | 7  | 22   | 0.642 | 1.087 | 1.099 | 1.241 | 62.11   | 21.43 | 13 | 22   | 322  | 36.5  | 5.48  |
| Q9Z123   | Semaphorin-4F OS=Mus musculus GN=Sema4f PE=2 SV=2 - [SEM4F_MOUSE]                                                                                 | 6.18  | 2  | 4  | 4  | 12   | 1.127 | 0.884 | 0.966 | 1.241 | 30.56   | 6.18  | 7  | 12   | 777  | 84.4  | 6.93  |
| P62737   | Actin, aortic smooth muscle OS=Mus musculus GN=Acta2 PE=1 SV=1 - [ACTA_MOUSE]                                                                     | 73.47 | 6  | 3  | 28 | 2426 | 0.699 | 1.682 | 1.066 | 1.241 | 6932.08 | 73.47 | 47 | 2426 | 377  | 42.0  | 5.39  |
| Q91VF2   | Histamine N-methyltransferase OS=Mus musculus GN=Hnmt PE=1 SV=1 - [HNMT_MOUSE]                                                                    | 22.03 | 1  | 7  | 7  | 20   | 0.647 | 1.218 | 0.969 | 1.241 | 56.63   | 22.03 | 12 | 20   | 295  | 33.6  | 5.06  |

|          |                                                                                                                                          |       |   |    |    |     |       |       |       |       |         |       |    |     |      |       |      |
|----------|------------------------------------------------------------------------------------------------------------------------------------------|-------|---|----|----|-----|-------|-------|-------|-------|---------|-------|----|-----|------|-------|------|
| Q8BHW2   | Protein OSCP1 OS=Mus musculus GN=Oscp1 PE=2 SV=1 - [OSCP1_MOUSE]                                                                         | 38.26 | 1 | 14 | 14 | 50  | 0.773 | 1.481 | 1.130 | 1.242 | 127.92  | 38.26 | 25 | 50  | 379  | 43.2  | 7.20 |
| Q8K207   | Uncharacterized protein C1orf21 homolog OS=Mus musculus PE=1 SV=1 - [CA021_MOUSE]                                                        | 19.83 | 1 | 2  | 2  | 4   | 2.335 | 1.214 | 1.369 | 1.242 | 13.43   | 19.83 | 3  | 4   | 121  | 13.9  | 5.22 |
| B1AS81   | CMP-N-acetylneuraminat-beta-1,4-galactoside alpha-2,3-sialyltransferase (Fragment) OS=Mus musculus GN=St3gal3 PE=2 SV=1 - [B1AS81_MOUSE] | 10.06 | 4 | 1  | 1  | 1   | 1.842 | 0.893 | 1.450 | 1.242 | 0.00    | 10.06 | 1  | 1   | 159  | 18.3  | 9.57 |
| Q9R1T4-2 | Isoform 1 of Septin-6 OS=Mus musculus GN=Sept6 - [SEPT6_MOUSE]                                                                           | 50.12 | 4 | 10 | 21 | 209 | 0.784 | 0.966 | 1.352 | 1.242 | 553.62  | 50.12 | 38 | 209 | 427  | 48.7  | 6.55 |
| Q9D032-2 | Isoform 2 of Single-stranded DNA-binding protein 3 OS=Mus musculus GN=Ssbp3 - [SSBP3_MOUSE]                                              | 8.31  | 4 | 2  | 2  | 3   | 1.701 | 1.495 | 1.372 | 1.242 | 10.52   | 8.31  | 3  | 3   | 361  | 37.7  | 6.73 |
| P06745   | Glucose-6-phosphate isomerase OS=Mus musculus GN=Gpi PE=1 SV=4 - [G6PI_MOUSE]                                                            | 57.17 | 1 | 16 | 34 | 739 | 1.353 | 1.283 | 1.145 | 1.242 | 1912.52 | 57.17 | 65 | 739 | 558  | 62.7  | 8.13 |
| Q60936   | Chaperone activity of bcl complex-like, mitochondrial OS=Mus musculus GN=Adck3 PE=2 SV=2 - [ADCK3_MOUSE]                                 | 14.26 | 4 | 6  | 7  | 22  | 1.137 | 1.367 | 1.126 | 1.242 | 76.20   | 14.26 | 13 | 22  | 645  | 71.7  | 6.54 |
| A2A6U3   | Septin-9 OS=Mus musculus GN=Sept9 PE=2 SV=1 - [A2A6U3_MOUSE]                                                                             | 55.22 | 6 | 28 | 28 | 118 | 1.061 | 1.342 | 1.437 | 1.243 | 335.05  | 55.22 | 49 | 118 | 565  | 63.7  | 8.32 |
| Q8K4Z0-2 | Isoform 2 of Leucine-rich repeat LGI family member 2 OS=Mus musculus GN=Lgi2 - [LGI2_MOUSE]                                              | 24.91 | 2 | 13 | 13 | 38  | 0.840 | 0.604 | 1.088 | 1.243 | 111.52  | 24.91 | 23 | 38  | 542  | 62.0  | 6.54 |
| Q8JZZ0   | UDP-glucuronosyltransferase 3A2 OS=Mus musculus GN=Ugt3a2 PE=2 SV=2 - [TAGL3_MOUSE]                                                      | 7.07  | 1 | 3  | 3  | 3   | 3.441 | 1.061 | 1.163 | 1.243 | 5.36    | 7.07  | 3  | 3   | 523  | 59.6  | 7.53 |
| Q9R1Q8   | Transgelin-3 OS=Mus musculus GN=Tagln3 PE=1 SV=1 - [TAGL3_MOUSE]                                                                         | 80.90 | 1 | 14 | 17 | 266 | 1.363 | 0.896 | 1.206 | 1.243 | 767.64  | 80.90 | 32 | 266 | 199  | 22.5  | 7.33 |
| A2A8L1   | Protein Chd5 OS=Mus musculus GN=Chd5 PE=2 SV=1 - [A2A8L1_MOUSE]                                                                          | 9.04  | 5 | 4  | 16 | 35  | 0.890 | 0.904 | 1.234 | 1.243 | 92.63   | 9.04  | 24 | 35  | 1946 | 222.4 | 6.24 |
| E9PX70   | Collagen alpha-1(XII) chain OS=Mus musculus GN=Col12a1 PE=2 SV=1 - [E9PX70_MOUSE]                                                        | 12.60 | 8 | 24 | 24 | 69  | 1.097 | 4.647 | 1.189 | 1.243 | 222.10  | 12.60 | 40 | 69  | 3064 | 333.5 | 5.80 |
| Q99KP3   | Lambda-crystallin homolog OS=Mus musculus GN=Cryl1 PE=2 SV=3 - [CRYL1_MOUSE]                                                             | 54.86 | 1 | 14 | 14 | 33  | 0.667 | 1.720 | 1.286 | 1.243 | 104.32  | 54.86 | 22 | 33  | 319  | 35.2  | 5.86 |
| Q7TQD2   | Tubulin polymerization-promoting protein OS=Mus musculus GN=Tppp PE=1 SV=1 - [TPPP_MOUSE]                                                | 68.35 | 2 | 16 | 17 | 356 | 1.290 | 0.728 | 1.827 | 1.243 | 1017.44 | 68.35 | 27 | 356 | 218  | 23.6  | 9.42 |
| Q6VWV5   | Atrial natriuretic peptide receptor 2 OS=Mus musculus GN=Npr2 PE=2 SV=2 - [ANPRB_MOUSE]                                                  | 11.37 | 7 | 9  | 10 | 14  | 0.884 | 1.099 | 0.830 | 1.243 | 31.95   | 11.37 | 12 | 14  | 1047 | 117.0 | 6.87 |
| P43006-2 | Isoform Glt-1A of Excitatory amino acid transporter 2 OS=Mus musculus GN=Slc1a2 - [EAA2_MOUSE]                                           | 33.04 | 5 | 3  | 20 | 704 | 0.689 | 1.203 | 1.442 | 1.243 | 2203.04 | 33.04 | 33 | 704 | 569  | 61.7  | 6.84 |
| Q9R053   | Sodium channel protein type 11 subunit alpha OS=Mus musculus GN=Scn11a PE=1 SV=2 - [SCNBA_MOUSE]                                         | 1.76  | 1 | 1  | 3  | 11  | 1.563 | 1.378 | 1.050 | 1.244 | 23.06   | 1.76  | 3  | 11  | 1765 | 201.3 | 8.27 |
| Q9WU79   | Proline dehydrogenase 1, mitochondrial OS=Mus musculus GN=Prodh PE=2 SV=2 - [PROD_MOUSE]                                                 | 30.05 | 5 | 14 | 14 | 58  | 0.844 | 1.508 | 1.212 | 1.244 | 193.93  | 30.05 | 26 | 58  | 599  | 68.0  | 8.24 |
| Q61753   | D-3-phosphoglycerate dehydrogenase OS=Mus musculus GN=Phgdh PE=1 SV=3 - [SERA_MOUSE]                                                     | 40.34 | 2 | 21 | 21 | 146 | 0.741 | 0.953 | 1.097 | 1.244 | 457.57  | 40.34 | 40 | 146 | 533  | 56.5  | 6.54 |
| P97494   | Glutamate-cysteine ligase catalytic subunit OS=Mus musculus GN=Gclc PE=2 SV=4 - [GSH1_MOUSE]                                             | 45.37 | 1 | 20 | 20 | 76  | 0.871 | 1.146 | 1.113 | 1.244 | 226.87  | 45.37 | 32 | 76  | 637  | 72.5  | 5.90 |
| Q9D0M1   | Phosphoribosyl pyrophosphate synthase-associated protein 1 OS=Mus musculus GN=Ppssg1 PE=1 SV=1 - [PPSSG1_MOUSE]                          | 58.71 | 4 | 11 | 15 | 62  | 0.860 | 1.141 | 1.009 | 1.244 | 212.95  | 58.71 | 28 | 62  | 356  | 39.4  | 7.20 |
| Q9WTK7   | Serine/threonine-protein kinase STK11 OS=Mus musculus GN=Stk11 PE=1 SV=1 - [STK11_MOUSE]                                                 | 27.29 | 4 | 11 | 12 | 25  | 0.909 | 1.035 | 1.117 | 1.244 | 68.89   | 27.29 | 20 | 25  | 436  | 49.2  | 6.84 |

|          |                                                                                                                      |       |    |    |    |      |       |       |       |       |         |       |     |      |      |       |      |
|----------|----------------------------------------------------------------------------------------------------------------------|-------|----|----|----|------|-------|-------|-------|-------|---------|-------|-----|------|------|-------|------|
| Q8CGK7   | Guanine nucleotide-binding protein G(olf) subunit alpha OS=Mus musculus GN=Gnal PE=1 SV=1 - [GNAL_MOUSE]             | 42.26 | 4  | 10 | 13 | 109  | 1.076 | 1.563 | 3.245 | 1.245 | 298.89  | 42.26 | 22  | 109  | 381  | 44.3  | 6.65 |
| Q6PBC0   | Cds2 protein OS=Mus musculus GN=Cds2 PE=2 SV=1 - [Q6PBC0_MOUSE]                                                      | 20.93 | 3  | 2  | 2  | 29   | 0.572 | 1.188 | 0.966 | 1.245 | 94.76   | 20.93 | 4   | 29   | 129  | 14.9  | 4.94 |
| F6SZ47   | Serine/threonine-protein kinase B-raf (Fragment) OS=Mus musculus GN=Brar PE=2 SV=1 - [F6SZ47_MOUSE]                  | 38.40 | 3  | 3  | 24 | 82   | 1.078 | 1.186 | 1.245 | 1.245 | 245.26  | 38.40 | 44  | 82   | 750  | 83.1  | 7.68 |
| Q8BWT1   | 3-ketoacyl-CoA thiolase, mitochondrial OS=Mus musculus GN=Acaa2 PE=1 SV=3 - [THIM_MOUSE]                             | 75.82 | 1  | 22 | 23 | 150  | 1.247 | 1.510 | 0.989 | 1.245 | 521.46  | 75.82 | 37  | 150  | 397  | 41.8  | 8.09 |
| P27681   | Gamma-aminobutyric acid receptor subunit gamma-3 OS=Mus musculus GN=Gabrg3 PE=2 SV=2 - [GBRG3_MOUSE]                 | 4.28  | 2  | 2  | 2  | 3    | 1.660 | 1.509 | 1.021 | 1.245 | 4.09    | 4.28  | 3   | 3    | 467  | 54.3  | 8.05 |
| Q02357-5 | Isoform 5 of Ankyrin-1 OS=Mus musculus GN=Ank1 - [ANK1_MOUSE]                                                        | 38.47 | 17 | 55 | 59 | 223  | 1.054 | 0.728 | 0.841 | 1.245 | 682.99  | 38.47 | 103 | 223  | 1744 | 191.9 | 7.87 |
| O88741   | Ganglioside-induced differentiation-associated protein 1 OS=Mus musculus GN=Gdap1 PE=1 SV=1 - [GDAP1_MOUSE]          | 33.80 | 2  | 11 | 12 | 119  | 0.739 | 0.737 | 1.006 | 1.245 | 330.82  | 33.80 | 24  | 119  | 358  | 41.3  | 8.37 |
| E9Q2P0   | Slit homolog 1 protein OS=Mus musculus GN=Slit1 PE=2 SV=1 - [E9Q2P0_MOUSE]                                           | 7.82  | 4  | 9  | 9  | 19   | 1.672 | 0.767 | 0.814 | 1.245 | 59.00   | 7.82  | 14  | 19   | 1458 | 159.0 | 6.68 |
| Q9D3P9   | Neurotensin/neurodynin N OS=Mus musculus GN=Nts PE=2 SV=1 - [NEUT_MOUSE]                                             | 12.43 | 1  | 2  | 2  | 5    | 1.074 | 1.073 | 0.979 | 1.245 | 15.97   | 12.43 | 3   | 5    | 169  | 19.6  | 7.30 |
| Q8K1G2   | Limbin OS=Mus musculus GN=Evic2 PE=1 SV=1 - [LBN_MOUSE]                                                              | 5.90  | 1  | 3  | 6  | 7    | 0.820 | 1.244 | 1.358 | 1.246 | 19.79   | 5.90  | 6   | 7    | 1220 | 137.6 | 6.20 |
| Q7TMF3   | NADH dehydrogenase [ubiquinone] 1 alpha subcomplex subunit 12 OS=Mus musculus GN=Ndufa12 PE=1 SV=2 - [NDUFA12_MOUSE] | 87.59 | 2  | 12 | 12 | 99   | 0.938 | 1.133 | 1.157 | 1.246 | 351.54  | 87.59 | 22  | 99   | 145  | 17.1  | 9.36 |
| Q8R123   | FAD synthase OS=Mus musculus GN=Flad1 PE=1 SV=1 - [FAD1_MOUSE]                                                       | 35.57 | 4  | 13 | 13 | 33   | 0.686 | 1.155 | 1.138 | 1.246 | 88.99   | 35.57 | 20  | 33   | 492  | 54.7  | 6.64 |
| Q9JKL5   | Calcineurin B homologous protein 3 OS=Mus musculus GN=Tesc PE=1 SV=2 - [CHP3_MOUSE]                                  | 35.98 | 1  | 6  | 6  | 36   | 1.349 | 1.656 | 2.098 | 1.246 | 107.64  | 35.98 | 11  | 36   | 214  | 24.6  | 4.98 |
| Q6P3B9   | Putative ribosome-binding factor A, mitochondrial OS=Mus musculus GN=Rbfa PE=2 SV=1 - [RBFA_MOUSE]                   | 6.29  | 1  | 2  | 2  | 4    | 1.227 | 0.721 | 1.131 | 1.247 | 7.74    | 6.29  | 3   | 4    | 350  | 39.3  | 7.33 |
| A9Z1V5   | von Willebrand factor A domain-containing protein 5B1 OS=Mus musculus GN=Vwa5b1 PE=2 SV=1 - [VWSB1_MOUSE]            | 12.35 | 2  | 11 | 11 | 35   | 0.931 | 1.159 | 0.743 | 1.247 | 82.79   | 12.35 | 20  | 35   | 1215 | 133.9 | 7.93 |
| P02798   | Metallothionein-2 OS=Mus musculus GN=Mt2 PE=1 SV=2 - [MT2_MOUSE]                                                     | 32.79 | 1  | 2  | 2  | 3    | 1.127 | 0.783 | 1.630 | 1.247 | 8.44    | 32.79 | 3   | 3    | 61   | 6.1   | 7.83 |
| Q9DBB8   | Trans-1,2-dihydrobenzene-1,2-diol dehydrogenase OS=Mus musculus GN=Dhdh PE=2 SV=1 - [DHDH_MOUSE]                     | 40.54 | 1  | 11 | 11 | 45   | 1.339 | 1.599 | 1.119 | 1.247 | 158.40  | 40.54 | 20  | 45   | 333  | 36.3  | 6.44 |
| J3QQ18   | Ras GTPase-activating protein SynGAP OS=Mus musculus GN=Syngap1 PE=4 SV=1 [J3QQ18_MOUSE]                             | 40.67 | 1  | 1  | 49 | 371  | 0.992 | 2.477 | 2.599 | 1.248 | 1090.43 | 40.67 | 87  | 371  | 1308 | 144.8 | 9.01 |
| Q8K097-2 | Isoform 2 of Protein lifeguard 2 OS=Mus musculus GN=Faim2 - [LFG2_MOUSE]                                             | 15.08 | 2  | 3  | 3  | 24   | 1.530 | 1.286 | 1.126 | 1.248 | 69.71   | 15.08 | 6   | 24   | 305  | 34.2  | 7.46 |
| Q9DAC2   | Complement component 8, gamma subunit, isoform CRA_b OS=Mus musculus GN=C8g PE=2 SV=1 - [Q9DAC2_MOUSE]               | 19.05 | 2  | 2  | 2  | 9    | 2.035 | 1.405 | 1.021 | 1.248 | 35.96   | 19.05 | 4   | 9    | 168  | 18.9  | 8.32 |
| Q02788   | Collagen alpha-2(VI) chain OS=Mus musculus GN=Col6a2 PE=2 SV=3 - [CO6A2_MOUSE]                                       | 14.80 | 3  | 12 | 13 | 37   | 1.032 | 4.204 | 0.887 | 1.248 | 80.63   | 14.80 | 21  | 37   | 1034 | 110.3 | 6.42 |
| Q8K274   | Ketosamine-3-kinase OS=Mus musculus GN=Fn3krp PE=2 SV=2 - [KT3K_MOUSE]                                               | 33.01 | 1  | 10 | 10 | 48   | 0.760 | 1.036 | 1.133 | 1.248 | 133.95  | 33.01 | 17  | 48   | 309  | 34.4  | 7.87 |
| P17183   | Gamma-enolase OS=Mus musculus GN=Eno2 PE=1 SV=2 - [ENOG_MOUSE]                                                       | 79.95 | 8  | 20 | 30 | 1753 | 1.785 | 1.147 | 1.123 | 1.248 | 5705.41 | 79.95 | 55  | 1753 | 434  | 47.3  | 5.11 |
| Q35350   | Calpain-1 catalytic subunit OS=Mus musculus GN=Capn1 PE=2 SV=1 - [CAN1_MOUSE]                                        | 31.14 | 1  | 18 | 18 | 42   | 0.803 | 1.160 | 1.031 | 1.248 | 128.06  | 31.14 | 29  | 42   | 713  | 82.1  | 5.87 |
| Q9ETS4-3 | Isoform 3 of Palladin OS=Mus musculus GN=Palld - [PALLD_MOUSE]                                                       | 21.72 | 7  | 11 | 11 | 27   | 1.002 | 3.141 | 0.936 | 1.249 | 70.89   | 21.72 | 17  | 27   | 663  | 72.3  | 7.68 |

|          |                                                                                                             |       |   |    |    |     |       |       |       |       |        |       |    |     |      |       |      |
|----------|-------------------------------------------------------------------------------------------------------------|-------|---|----|----|-----|-------|-------|-------|-------|--------|-------|----|-----|------|-------|------|
| Q5DQR4-3 | Isoform 3 of Syntaxin-binding protein 5-like<br>OS=Mus musculus<br>GN=Sbcbp5l -                             | 31.27 | 5 | 1  | 27 | 109 | 0.760 | 0.656 | 1.197 | 1.249 | 350.16 | 31.27 | 49 | 109 | 1161 | 128.8 | 6.76 |
| Q99ML4   | Protein FAM69B OS=Mus musculus GN=Fam69b<br>PE=1 SV=1 -<br>[FA69B_MOUSE]                                    | 12.06 | 3 | 5  | 5  | 9   | 0.916 | 0.742 | 1.291 | 1.250 | 23.04  | 12.06 | 9  | 9   | 431  | 48.8  | 8.15 |
| Q924S8   | Sprouty-related, EVH1 domain-containing protein 1 OS=Mus musculus<br>GN=Spred1 PE=1 SV=1 -<br>[SPRE1_MOUSE] | 22.52 | 2 | 8  | 9  | 26  | 0.900 | 0.818 | 1.214 | 1.250 | 67.82  | 22.52 | 17 | 26  | 444  | 50.6  | 6.47 |
| Q91JK5   | Nucleolar RNA helicase 2 OS=Mus musculus<br>GN=Ddx21 PE=1 SV=3 -<br>[DDX21_MOUSE]                           | 8.93  | 1 | 7  | 7  | 13  | 0.954 | 0.852 | 0.913 | 1.250 | 34.02  | 8.93  | 11 | 13  | 851  | 93.5  | 9.11 |
| Q9QXL2-3 | Isoform 3 of Kinesin-like protein KIF21A OS=Mus musculus GN=Kif21a -<br>[KIF21A_MOUSE]                      | 33.44 | 2 | 1  | 43 | 198 | 0.968 | 0.708 | 0.892 | 1.250 | 620.49 | 33.44 | 72 | 198 | 1567 | 174.7 | 6.06 |
| Q61146   | Occludin OS=Mus musculus GN=Ocln PE=1 SV=1 -<br>[OCLN_MOUSE]                                                | 9.02  | 2 | 3  | 3  | 7   | 1.606 | 0.984 | 0.885 | 1.250 | 12.35  | 9.02  | 5  | 7   | 521  | 59.0  | 6.48 |
| Q8BGP6   | Solute carrier family 25 member 40 OS=Mus musculus GN=Slc25a40<br>PE=2 SV=1 -                               | 5.34  | 2 | 2  | 2  | 8   | 0.835 | 1.030 | 0.935 | 1.250 | 9.54   | 5.34  | 3  | 8   | 337  | 37.9  | 8.95 |
| Q80WB5   | Protein N-terminal glutamine amidohydrolase OS=Mus musculus<br>GN=Wdyhv1 PE=1 SV=1 -<br>[NTAQ1_MOUSE]       | 20.57 | 1 | 3  | 3  | 8   | 3.148 | 1.244 | 0.685 | 1.250 | 23.24  | 20.57 | 4  | 8   | 209  | 24.3  | 5.43 |
| Q6NY15-2 | Isoform 2 of Testis-specific gene 10 protein OS=Mus musculus GN=Tsga10 -<br>[TSG10_MOUSE]                   | 3.33  | 4 | 2  | 3  | 5   | 0.931 | 0.908 | 1.061 | 1.250 | 9.74   | 3.33  | 5  | 5   | 690  | 80.3  | 5.80 |
| Q9EQ06   | Estradiol 17-beta-dehydrogenase 11 OS=Mus musculus<br>GN=Hsd17b11 PE=2 SV=1 -<br>[DHB11_MOUSE]              | 51.01 | 5 | 13 | 13 | 36  | 0.664 | 1.182 | 0.964 | 1.250 | 119.66 | 51.01 | 25 | 36  | 298  | 32.9  | 8.66 |
| A2APV2-3 | Isoform 3 of Formin-like protein 2 OS=Mus musculus GN=Fmnl2 -<br>[FMNL2_MOUSE]                              | 24.56 | 7 | 9  | 28 | 85  | 0.969 | 0.773 | 1.229 | 1.250 | 256.92 | 24.56 | 52 | 85  | 1091 | 123.9 | 7.65 |
| P52293   | Importin subunit alpha-1 OS=Mus musculus<br>GN=Kpna2 PE=1 SV=2 -<br>[IMA1_MOUSE]                            | 7.37  | 4 | 2  | 3  | 8   | 0.864 | 0.583 | 0.696 | 1.250 | 31.05  | 7.37  | 5  | 8   | 529  | 57.9  | 5.68 |
| A7M7C7   | SKI family transcriptional corepressor 2 OS=Mus musculus GN=Skor2 PE=1 SV=1 -<br>[SKOR2_MOUSE]              | 3.27  | 1 | 2  | 2  | 3   | 1.180 | 1.253 | 1.281 | 1.250 | 0.00   | 3.27  | 2  | 3   | 1008 | 105.6 | 6.67 |
| E9Q6E9   | Uncharacterized protein OS=Mus musculus<br>GN=Simc1 PE=2 SV=1 -<br>[E9Q6E9_MOUSE]                           | 3.69  | 2 | 3  | 3  | 7   | 1.176 | 2.086 | 1.874 | 1.251 | 16.97  | 3.69  | 5  | 7   | 1354 | 146.5 | 6.39 |
| P16283   | Anion exchange protein 3 OS=Mus musculus<br>GN=Slc4a3 PE=1 SV=2 -<br>[B3A3_MOUSE]                           | 18.09 | 9 | 14 | 17 | 59  | 0.729 | 0.702 | 1.229 | 1.251 | 167.43 | 18.09 | 28 | 59  | 1227 | 135.3 | 6.51 |
| Q9ESJ4   | NCK-interacting protein with SH3 domain OS=Mus musculus GN=Nckipsd<br>PE=2 SV=2 -<br>[SPN90_MOUSE]          | 35.85 | 1 | 24 | 24 | 167 | 0.781 | 1.197 | 1.229 | 1.251 | 479.31 | 35.85 | 45 | 167 | 714  | 78.5  | 6.05 |
| P97314   | Cysteine and glycine-rich protein 2 OS=Mus musculus GN=Csrp2 PE=1 SV=3 -<br>[CSR2_MOUSE]                    | 45.08 | 1 | 7  | 7  | 39  | 1.257 | 3.909 | 1.068 | 1.252 | 118.35 | 45.08 | 14 | 39  | 193  | 20.9  | 8.62 |
| P41969   | ETS domain-containing protein Elk-1 OS=Mus musculus GN=Elk1 PE=2 SV=3 -<br>[ELK1_MOUSE]                     | 15.62 | 1 | 3  | 3  | 4   | 2.609 | 1.166 | 1.238 | 1.252 | 8.26   | 15.62 | 4  | 4   | 429  | 45.2  | 6.80 |
| Q3U1V6   | Ubiquitin-conjugating enzyme E2 variant 3 OS=Mus musculus<br>GN=Uevl3 PE=2 SV=1 -<br>[UEVL3_MOUSE]          | 19.11 | 3 | 8  | 9  | 38  | 0.691 | 1.034 | 0.924 | 1.252 | 105.91 | 19.11 | 16 | 38  | 471  | 51.6  | 7.28 |
| B2RY83   | Inactive heparanase-2 OS=Mus musculus<br>GN=Hpse2 PE=2 SV=1 -<br>[HPSE2_MOUSE]                              | 1.69  | 1 | 1  | 1  | 1   | 0.872 | 1.082 | 2.082 | 1.252 | 1.73   | 1.69  | 1  | 1   | 592  | 66.6  | 9.96 |
| Q9CWD3   | Nucleoside diphosphate-linked moiety X motif 17 OS=Mus musculus<br>GN=Nudt17 PE=2 SV=1 -<br>[NUDT17_MOUSE]  | 5.41  | 2 | 1  | 1  | 3   | 0.742 | 1.115 | 0.895 | 1.252 | 15.26  | 5.41  | 2  | 3   | 296  | 32.7  | 5.63 |
| Q9D1R2   | Protein KTI12 homolog OS=Mus musculus<br>GN=Kti12 PE=1 SV=1 -<br>[KTI12_MOUSE]                              | 4.56  | 1 | 2  | 2  | 2   | 1.347 | 1.095 | 1.174 | 1.252 | 3.71   | 4.56  | 2  | 2   | 351  | 38.4  | 6.92 |
| Q8CDJ6   | Protein 4932411E22Rik OS=Mus musculus<br>GN=4932411E22Rik PE=2 SV=1 -<br>[Q8CDJ6_MOUSE]                     | 9.68  | 1 | 3  | 3  | 4   | 1.818 | 1.541 | 1.350 | 1.253 | 8.08   | 9.68  | 4  | 4   | 403  | 44.0  | 6.11 |
| Q8K4Z3   | NAD(P)H-hydrate epimerase OS=Mus musculus GN=Apoa1bp<br>PE=1 SV=1 -                                         | 55.67 | 1 | 10 | 10 | 74  | 0.837 | 1.080 | 1.012 | 1.253 | 212.98 | 55.67 | 17 | 74  | 282  | 31.0  | 7.69 |
| Q91WE3   | Ribonuclease P protein subunit p25 OS=Mus musculus GN=Rpp25<br>PE=2 SV=1 -                                  | 41.71 | 1 | 5  | 5  | 25  | 1.289 | 0.781 | 1.937 | 1.253 | 34.27  | 41.71 | 5  | 25  | 199  | 21.0  | 9.16 |



|          |                                                                                                                          |       |     |    |    |     |       |       |       |       |        |       |     |     |      |       |       |
|----------|--------------------------------------------------------------------------------------------------------------------------|-------|-----|----|----|-----|-------|-------|-------|-------|--------|-------|-----|-----|------|-------|-------|
| B1AU41   | Alpha-1B adrenergic receptor (Fragment)<br>OS=Mus musculus<br>GN=Adra1b PE=2 SV=1 - [B1AU41_MOUSE]                       | 5.84  | 3   | 2  | 2  | 3   | 1.358 | 0.603 | 1.171 | 1.253 | 6.56   | 5.84  | 3   | 3   | 462  | 51.1  | 9.54  |
| Q8VIG0-2 | Isoform 2 of Zinc finger CCHC domain-containing protein 14 OS=Mus musculus GN=Zcchc14 - [ZCH14_MOUSE]                    | 3.71  | 3   | 1  | 1  | 1   | 4.880 | 4.567 | 0.647 | 1.253 | 2.24   | 3.71  | 1   | 1   | 944  | 98.6  | 8.25  |
| H3BLS1   | Probable tRNA pseudouridine synthase 2 OS=Mus musculus GN=Tru2 PE=4 SV=1 - [H3BLS1_MOUSE]                                | 10.74 | 4   | 1  | 1  | 4   | 3.247 | 3.221 | 0.495 | 1.253 | 7.04   | 10.74 | 1   | 4   | 121  | 13.2  | 10.67 |
| F6UQD0   | Protein Zfp273 OS=Mus musculus GN=Zfp273 PE=4 SV=1 - [F6UQD0_MOUSE]                                                      | 16.24 | 146 | 1  | 2  | 3   | 1.928 | 1.218 | 1.016 | 1.253 | 5.05   | 16.24 | 2   | 3   | 468  | 54.3  | 9.06  |
| F8VQ72   | Mitogen-activated protein kinase kinase kinase 1 OS=Mus musculus GN=Map3k1 PE=2 SV=1 - [F8VQ72_MOUSE]                    | 5.29  | 2   | 3  | 3  | 6   | 1.428 | 1.090 | 1.162 | 1.253 | 14.86  | 5.29  | 3   | 6   | 1493 | 161.3 | 7.88  |
| Q9JKL4   | NADH dehydrogenase [ubiquinone] 1 alpha subcomplex assembly factor 3 OS=Mus musculus GN=Nduf3 PE=2 SV=1 - [NDUF3_MOUSE]  | 29.19 | 1   | 3  | 3  | 17  | 1.229 | 1.137 | 1.179 | 1.254 | 52.76  | 29.19 | 5   | 17  | 185  | 20.7  | 8.05  |
| Q8C5L6   | Inositol polyphosphate 5-phosphatase K OS=Mus musculus GN=Inpp5k PE=2 SV=2 - [INPSK_MOUSE]                               | 9.62  | 2   | 4  | 4  | 7   | 0.718 | 1.146 | 1.012 | 1.254 | 14.54  | 9.62  | 6   | 7   | 468  | 54.1  | 5.88  |
| Q9QYB8   | Beta-adducin OS=Mus musculus GN=Add2 PE=1 SV=4 - [ADDB_MOUSE]                                                            | 44.41 | 3   | 29 | 30 | 228 | 0.909 | 1.154 | 1.701 | 1.255 | 662.42 | 44.41 | 52  | 228 | 725  | 80.6  | 6.21  |
| Q8BGV9   | Cysteine protease ATG4D OS=Mus musculus GN=Atg4d PE=1 SV=1 - [ATG4D_MOUSE]                                               | 2.11  | 1   | 1  | 1  | 2   | 0.594 | 0.603 | 0.923 | 1.255 | 7.51   | 2.11  | 2   | 2   | 474  | 52.9  | 8.62  |
| O89112   | LanC-like protein 1 OS=Mus musculus GN=Lanc1 PE=1 SV=1 - [LANC1_MOUSE]                                                   | 29.07 | 2   | 10 | 10 | 59  | 0.727 | 1.445 | 1.413 | 1.255 | 166.90 | 29.07 | 15  | 59  | 399  | 45.3  | 7.77  |
| Q64471   | Glutathione S-transferase theta-1 OS=Mus musculus GN=Gstt1 PE=1 SV=4 - [GSTT1_MOUSE]                                     | 32.08 | 3   | 9  | 9  | 29  | 0.900 | 1.553 | 0.887 | 1.256 | 83.06  | 32.08 | 17  | 29  | 240  | 27.4  | 7.27  |
| Q9D2I5-7 | Isoform 7 of Lish domain-containing protein ARMC9 OS=Mus musculus GN=Armc9 - [ARMC9_MOUSE]                               | 3.02  | 7   | 2  | 2  | 3   | 0.899 | 0.622 | 0.975 | 1.256 | 4.02   | 3.02  | 3   | 3   | 496  | 55.3  | 5.77  |
| E9PZ16   | Basement membrane-specific heparan sulfate proteoglycan core protein OS=Mus musculus GN=Hspg2 PE=2 SV=1 - [E9PZ16_MOUSE] | 22.34 | 3   | 73 | 73 | 300 | 1.266 | 1.610 | 1.064 | 1.256 | 883.47 | 22.34 | 132 | 300 | 4383 | 469.5 | 6.47  |
| Q8R464   | Cell adhesion molecule 4 OS=Mus musculus GN=Cadm4 PE=1 SV=1 - [CADM4_MOUSE]                                              | 39.95 | 1   | 12 | 12 | 122 | 1.358 | 0.683 | 1.056 | 1.256 | 408.91 | 39.95 | 24  | 122 | 388  | 42.7  | 6.30  |
| A6Z147   | Fructose-bisphosphate aldolase OS=Mus musculus GN=Aldoa2 PE=2 SV=1 - [ALDOA2_MOUSE]                                      | 28.02 | 1   | 2  | 15 | 317 | 0.889 | 1.010 | 1.061 | 1.256 | 790.46 | 28.02 | 27  | 317 | 364  | 39.3  | 7.44  |
| Q80UW3   | Ras and Rab interactor-like protein OS=Mus musculus GN=Rinl PE=1 SV=1 - [RINL_MOUSE]                                     | 1.07  | 1   | 1  | 1  | 2   | 1.550 | 1.710 | 1.102 | 1.257 | 0.00   | 1.07  | 1   | 2   | 563  | 62.3  | 6.20  |
| Q9Z1S5-2 | Isoform 2 of Neuronal-specific septin-3 OS=Mus musculus GN=Sept3 - [SEPT3_MOUSE]                                         | 56.38 | 2   | 15 | 15 | 151 | 1.007 | 1.394 | 1.274 | 1.257 | 383.42 | 56.38 | 26  | 151 | 337  | 38.7  | 6.81  |
| P97370   | Sodium/potassium-transporting ATPase subunit beta-3 OS=Mus musculus GN=Atp1b3 PE=1 SV=1 - [ATP1B3_MOUSE]                 | 48.20 | 1   | 11 | 11 | 35  | 0.653 | 1.150 | 0.936 | 1.257 | 93.11  | 48.20 | 19  | 35  | 278  | 31.8  | 8.51  |
| Q812A5-2 | Isoform 2 of Proline-rich protein 5 OS=Mus musculus GN=Prr5 - [PRRS_MOUSE]                                               | 11.11 | 2   | 2  | 2  | 6   | 1.420 | 1.236 | 1.009 | 1.257 | 20.37  | 11.11 | 4   | 6   | 378  | 41.3  | 6.86  |
| D3Z0U3   | Transmembrane protein 120A (Fragment) OS=Mus musculus GN=Tmem120a PE=2 SV=1 - [D3Z0U3_MOUSE]                             | 10.75 | 2   | 2  | 2  | 3   | 0.919 | 1.052 | 1.182 | 1.257 | 6.00   | 10.75 | 3   | 3   | 93   | 10.7  | 5.15  |
| Q8CH3    | Plexin-B1 OS=Mus musculus GN=Plxb1 PE=1 SV=2 - [PLXB1_MOUSE]                                                             | 12.65 | 1   | 21 | 24 | 116 | 0.965 | 1.135 | 1.091 | 1.257 | 354.79 | 12.65 | 42  | 116 | 2119 | 231.2 | 5.55  |
| Q3UZD7   | Protein FAM71F1 OS=Mus musculus GN=Fam71f1 PE=2 SV=1 - [F71F1_MOUSE]                                                     | 3.52  | 3   | 1  | 1  | 1   | 0.599 | 2.710 | 2.274 | 1.258 | 2.59   | 3.52  | 1   | 1   | 341  | 38.7  | 9.23  |
| A7XUY5-2 | Isoform 2 of Selection and upkeep of intraepithelial T-cells protein 5 OS=Mus musculus GN=Skint5 - [SKIT5_MOUSE]         | 5.21  | 6   | 4  | 5  | 6   | 1.598 | 2.784 | 1.855 | 1.258 | 9.52   | 5.21  | 5   | 6   | 1440 | 163.4 | 8.16  |
| Q8K1S6-2 | Isoform 2 of Protein spire homolog 2 OS=Mus musculus GN=Spire2 - [SPIR2_MOUSE]                                           | 4.69  | 3   | 2  | 3  | 9   | 3.187 | 1.687 | 1.578 | 1.258 | 16.45  | 4.69  | 4   | 9   | 618  | 69.6  | 7.75  |

|          |                                                                                                                                   |       |   |    |    |     |       |       |       |       |         |       |     |     |      |       |      |
|----------|-----------------------------------------------------------------------------------------------------------------------------------|-------|---|----|----|-----|-------|-------|-------|-------|---------|-------|-----|-----|------|-------|------|
| O70622-2 | Isoform 2 of Reticulon-2<br>OS=Mus musculus<br>GN=Rtn2 -<br>[RTN2_MOUSE]                                                          | 8.33  | 2 | 1  | 1  | 2   | 0.356 | 0.817 | 0.982 | 1.258 | 5.52    | 8.33  | 2   | 2   | 204  | 22.2  | 9.44 |
| Q9E503-2 | Isoform 2 of T-box<br>transcription factor TBX20<br>OS=Mus musculus<br>GN=Tbx20 -                                                 | 5.39  | 2 | 1  | 1  | 1   | 1.075 | 1.030 | 1.291 | 1.258 | 2.87    | 5.39  | 1   | 1   | 297  | 33.2  | 7.58 |
| Q99NB1   | Acetyl-coenzyme A<br>synthetase 2-like,<br>mitochondrial OS=Mus<br>musculus GN=Acsc1 PE=1<br>SV=1 - [ACS2L_MOUSE]                 | 30.06 | 1 | 17 | 17 | 54  | 1.007 | 1.062 | 0.948 | 1.258 | 154.26  | 30.06 | 29  | 54  | 682  | 74.6  | 6.98 |
| Q6IMK7   | Diamine oxidase-like<br>protein 2 OS=Mus<br>musculus GN=Dox2 PE=3<br>SV=1 - [Q6IMK7_MOUSE]                                        | 1.52  | 1 | 1  | 1  | 1   | 0.934 | 1.546 | 0.996 | 1.259 | 2.88    | 1.52  | 1   | 1   | 723  | 81.8  | 7.06 |
| F8WHW6   | Phosphatidylinositol 4-<br>phosphate 5-kinase type-1<br>gamma OS=Mus musculus<br>GN=Pip5k1c PE=2 SV=1 -<br>[F8WHW6_MOUSE]         | 32.75 | 7 | 13 | 16 | 89  | 0.604 | 1.351 | 1.568 | 1.259 | 349.57  | 32.75 | 29  | 89  | 687  | 75.5  | 6.14 |
| Q3V117   | ATP-citrate synthase<br>OS=Mus musculus<br>GN=Acly PE=2 SV=1 -<br>[Q3V117_MOUSE]                                                  | 50.41 | 2 | 1  | 49 | 326 | 0.825 | 1.024 | 0.995 | 1.259 | 1011.73 | 50.41 | 93  | 326 | 1101 | 120.7 | 7.44 |
| E9QME5   | E3 ubiquitin-protein ligase<br>TRIM33 OS=Mus musculus<br>GN=Trim33 PE=2 SV=1 -<br>[E9QME5_MOUSE]                                  | 4.99  | 4 | 5  | 5  | 7   | 1.562 | 0.997 | 1.385 | 1.259 | 20.13   | 4.99  | 7   | 7   | 1123 | 121.6 | 6.73 |
| E9Q4T9   | Transmembrane protease<br>serine 4 OS=Mus musculus<br>GN=Tmprss4 PE=2 SV=1 -<br>[E9Q4T9_MOUSE]                                    | 8.06  | 2 | 1  | 1  | 1   | 1.345 | 0.709 | 0.859 | 1.259 | 0.00    | 8.06  | 1   | 1   | 335  | 36.7  | 7.52 |
| Q7TN22-2 | Isoform 2 of Thioredoxin<br>domain-containing protein<br>16 OS=Mus musculus<br>GN=Txdc16 -<br>[TXD16_MOUSE]                       | 3.66  | 2 | 2  | 2  | 2   | 1.873 | 1.016 | 1.532 | 1.259 | 4.63    | 3.66  | 2   | 2   | 819  | 92.0  | 5.31 |
| E9Q2C0   | Protein 9330101J02Rik<br>(Fragment) OS=Mus<br>musculus<br>GN=9330101J02Rik PE=2<br>SV=1 - [E9Q2C0_MOUSE]                          | 1.76  | 3 | 2  | 2  | 2   | 1.325 | 0.476 | 1.180 | 1.259 | 5.09    | 1.76  | 2   | 2   | 1423 | 163.6 | 7.61 |
| M0QWY6   | Cell surface glycoprotein<br>CD200 receptor 1 OS=Mus<br>musculus GN=Cd200r1<br>PE=4 SV=1 -<br>[M0QWY6_MOUSE]                      | 7.35  | 2 | 1  | 1  | 1   | 1.539 | 3.264 | 1.040 | 1.259 | 2.71    | 7.35  | 1   | 1   | 245  | 26.7  | 6.64 |
| Q60992   | Guanine nucleotide<br>exchange factor VAV2<br>OS=Mus musculus<br>GN=Vav2 PE=1 SV=1 -                                              | 4.95  | 1 | 3  | 3  | 5   | 1.746 | 0.971 | 1.048 | 1.259 | 6.33    | 4.95  | 3   | 5   | 868  | 99.9  | 6.84 |
| Q9CWR0-2 | Isoform 2 of Rho guanine<br>nucleotide exchange factor<br>25 OS=Mus musculus<br>GN=Arhgef25 -<br>[ARHGP_MOUSE]                    | 8.05  | 3 | 2  | 5  | 16  | 0.575 | 1.545 | 1.212 | 1.260 | 51.78   | 8.05  | 9   | 16  | 609  | 67.4  | 5.19 |
| Q497Y9   | C130050018Rik protein<br>OS=Mus musculus<br>GN=C130050018Rik PE=2<br>SV=1 - [Q497Y9_MOUSE]                                        | 1.97  | 1 | 1  | 1  | 2   | 0.577 | 1.868 | 1.402 | 1.260 | 4.89    | 1.97  | 2   | 2   | 356  | 38.7  | 8.34 |
| Q3UW66   | Sulfurtransferase OS=Mus<br>musculus GN=Mpst PE=2<br>SV=1 - [Q3UW66_MOUSE]                                                        | 44.44 | 2 | 11 | 11 | 62  | 0.752 | 1.748 | 1.664 | 1.260 | 191.70  | 44.44 | 20  | 62  | 297  | 33.1  | 6.47 |
| A1L3P4   | Sodium/hydrogen<br>exchanger OS=Mus<br>musculus GN=Slc9a6<br>PE=2 SV=1 -                                                          | 10.40 | 3 | 7  | 7  | 55  | 0.951 | 1.012 | 1.104 | 1.260 | 187.57  | 10.40 | 13  | 55  | 702  | 77.9  | 6.37 |
| Q01065   | Calcium/calmodulin-<br>dependent 3',5'-cyclic<br>nucleotide<br>phosphodiesterase 1B<br>OS=Mus musculus<br>GN=Cdc25c PE=1 SV=1 -   | 50.28 | 1 | 20 | 21 | 128 | 0.668 | 1.057 | 2.300 | 1.261 | 389.00  | 50.28 | 40  | 128 | 535  | 61.2  | 5.72 |
| Q80TJ1-2 | Isoform 2 of Calcium-<br>dependent secretion<br>activator 1 OS=Mus<br>musculus GN=Cadps -<br>[CAPS1_MOUSE]                        | 53.49 | 3 | 3  | 60 | 419 | 0.433 | 1.400 | 1.280 | 1.261 | 1262.61 | 53.49 | 103 | 419 | 1361 | 153.9 | 5.86 |
| Q99KE8-3 | Isoform 3 of Zinc finger<br>protein 64 OS=Mus<br>musculus GN=Zfp64 -<br>[ZFP64_MOUSE]                                             | 1.69  | 2 | 1  | 1  | 1   | 1.646 | 1.310 | 1.168 | 1.261 | 2.38    | 1.69  | 1   | 1   | 473  | 53.3  | 8.78 |
| E9PV66   | LIM domain kinase 1<br>OS=Mus musculus<br>GN=Limk1 PE=2 SV=1 -<br>[E9PV66_MOUSE]                                                  | 12.05 | 3 | 6  | 6  | 23  | 1.169 | 0.396 | 0.856 | 1.261 | 92.43   | 12.05 | 11  | 23  | 639  | 71.8  | 7.77 |
| Q8C4Q6   | Axin interactor,<br>dorsalization-associated<br>protein OS=Mus musculus<br>GN=Aida PE=1 SV=1 -<br>[AIDA_MOUSE]                    | 38.03 | 2 | 11 | 11 | 39  | 1.032 | 0.880 | 0.904 | 1.261 | 103.30  | 38.03 | 18  | 39  | 305  | 34.9  | 6.74 |
| P04919-2 | Isoform Kidney of Band 3<br>anion transport protein<br>OS=Mus musculus<br>GN=Slc4a1 -<br>[B3AT_MOUSE]                             | 25.06 | 2 | 13 | 13 | 67  | 1.213 | 1.497 | 0.608 | 1.261 | 185.80  | 25.06 | 24  | 67  | 850  | 94.2  | 6.68 |
| Q3V3R1   | Monofunctional C1-<br>tetrahydrofolate synthase,<br>mitochondrial OS=Mus<br>musculus GN=Mthfd11<br>PE=1 SV=2 -<br>[MTHFD11_MOUSE] | 38.28 | 1 | 32 | 33 | 110 | 0.803 | 1.150 | 0.959 | 1.261 | 310.20  | 38.28 | 60  | 110 | 977  | 105.7 | 7.02 |
| A2AWL7-3 | Isoform 3 of MAX gene-<br>associated protein<br>OS=Mus musculus<br>GN=Mga -                                                       | 2.46  | 6 | 3  | 4  | 10  | 1.395 | 1.080 | 0.909 | 1.261 | 28.34   | 2.46  | 5   | 10  | 2924 | 320.1 | 7.23 |

|          |                                                                                                                     |       |   |    |    |      |       |       |       |       |         |       |    |      |      |       |       |
|----------|---------------------------------------------------------------------------------------------------------------------|-------|---|----|----|------|-------|-------|-------|-------|---------|-------|----|------|------|-------|-------|
| D2EAC2-2 | Isoform 2 of Zinc finger BED domain-containing protein 6 OS=Mus musculus GN=Zbed6 - [ZBED6_MOUSE]                   | 1.07  | 2 | 1  | 1  | 1    | 1.889 | 2.279 | 1.250 | 1.261 | 0.00    | 1.07  | 1  | 1    | 934  | 104.4 | 6.89  |
| Q8V156-2 | Isoform 2 of Low-density lipoprotein receptor-related protein 4 OS=Mus musculus GN=Lrp4 - [LRP4_MOUSE]              | 3.03  | 2 | 5  | 5  | 10   | 0.976 | 1.080 | 1.316 | 1.262 | 24.06   | 3.03  | 8  | 10   | 1848 | 205.2 | 5.36  |
| Q99KE1   | NAD-dependent malic enzyme, mitochondrial OS=Mus musculus GN=Me2 PE=2 SV=1 - [MAOM_MOUSE]                           | 52.63 | 1 | 23 | 24 | 130  | 1.481 | 1.202 | 1.006 | 1.262 | 359.12  | 52.63 | 43 | 130  | 589  | 65.8  | 7.61  |
| Q9CQ54   | NADH dehydrogenase [ubiquinone] 1 subunit C2 OS=Mus musculus GN=Ndufc2 PE=1 SV=1 - [NDUC2_MOUSE]                    | 59.17 | 1 | 8  | 8  | 68   | 0.806 | 1.001 | 1.086 | 1.262 | 186.08  | 59.17 | 14 | 68   | 120  | 14.2  | 9.20  |
| Q924W6-2 | Isoform 2 of Tripartite motif-containing protein 66 OS=Mus musculus GN=Trim66 - [TRI66_MOUSE]                       | 5.54  | 4 | 5  | 5  | 10   | 0.842 | 0.591 | 0.979 | 1.262 | 23.92   | 5.54  | 7  | 10   | 1209 | 133.2 | 7.06  |
| Q8K1C9   | Leucine-rich repeat-containing protein 41 OS=Mus musculus GN=Lrrc41 PE=1 SV=3 - [LRC41_MOUSE]                       | 9.29  | 1 | 4  | 5  | 25   | 1.175 | 0.912 | 1.545 | 1.262 | 13.57   | 9.29  | 6  | 25   | 807  | 88.1  | 8.31  |
| F8WIE1   | Alpha-mannosidase 2C1 OS=Mus musculus GN=Man2c1 PE=2 SV=1 - [F8WIE1_MOUSE]                                          | 21.89 | 5 | 14 | 14 | 37   | 0.619 | 1.049 | 0.985 | 1.262 | 133.02  | 21.89 | 24 | 37   | 1037 | 115.4 | 6.46  |
| Q6PDC8   | Major facilitator superfamily domain-containing protein 4 OS=Mus musculus GN=Mfsd4 PE=2 SV=2 - [MFS4_MOUSE]         | 8.43  | 9 | 4  | 4  | 9    | 0.673 | 1.652 | 1.498 | 1.263 | 24.89   | 8.43  | 7  | 9    | 510  | 56.1  | 8.00  |
| Q8VEB6   | Zinc phosphodiesterase ELAC protein 1 OS=Mus musculus GN=Elac1 PE=2 SV=1 - [RNZ1_MOUSE]                             | 11.88 | 2 | 4  | 4  | 13   | 1.660 | 1.113 | 0.912 | 1.263 | 31.83   | 11.88 | 7  | 13   | 362  | 39.7  | 6.60  |
| Q9R112   | Sulfide:quinone oxidoreductase, mitochondrial OS=Mus musculus GN=Sqr1 PE=2 SV=3 - [SQRD_MOUSE]                      | 24.67 | 4 | 12 | 12 | 34   | 0.772 | 1.365 | 0.875 | 1.263 | 97.78   | 24.67 | 21 | 34   | 450  | 50.2  | 9.09  |
| P17182   | Alpha-enolase OS=Mus musculus GN=Eno1 PE=1 SV=3 - [ENOA_MOUSE]                                                      | 86.41 | 4 | 17 | 39 | 1795 | 0.955 | 1.259 | 1.226 | 1.263 | 5858.03 | 86.41 | 71 | 1795 | 434  | 47.1  | 6.80  |
| Q9R244-2 | Isoform 2 of Short transient receptor potential channel 2 OS=Mus musculus GN=Trpc2 - [TRPC2_MOUSE]                  | 1.12  | 9 | 1  | 2  | 4    | 1.236 | 1.407 | 1.512 | 1.263 | 7.35    | 1.12  | 2  | 4    | 1072 | 119.4 | 8.13  |
| Q64692   | CMP-N-acetylneuraminate-poly-alpha-2,8-sialyltransferase OS=Mus musculus GN=St8sia4 PE=2 SV=1 - [ST8A4_MOUSE]       | 5.57  | 1 | 1  | 1  | 1    | 2.057 | 1.354 | 1.339 | 1.263 | 3.12    | 5.57  | 1  | 1    | 359  | 41.2  | 9.80  |
| Q3UWH7   | Beta-adrenergic receptor kinase 2 OS=Mus musculus GN=Adrbk2 PE=2 SV=2 - [ADRBK2_MOUSE]                              | 15.70 | 1 | 7  | 12 | 26   | 1.123 | 1.569 | 1.064 | 1.264 | 70.03   | 15.70 | 17 | 26   | 688  | 79.6  | 7.69  |
| Q9R1V7   | Disintegrin and metalloproteinase domain-containing protein 23 OS=Mus musculus GN=Adam23 PE=1 SV=1 - [ADAM23_MOUSE] | 21.71 | 7 | 15 | 15 | 96   | 0.837 | 0.751 | 1.162 | 1.264 | 294.76  | 21.71 | 28 | 96   | 829  | 91.5  | 7.68  |
| O08553   | Dihydropyrimidinase-related protein 2 OS=Mus musculus GN=Dpysl2 PE=1 SV=2 - [DPYSL2_MOUSE]                          | 80.07 | 1 | 37 | 43 | 2645 | 1.413 | 1.275 | 1.172 | 1.264 | 8139.76 | 80.07 | 81 | 2645 | 572  | 62.2  | 6.38  |
| D3YWN6   | Protein downstream neighbor of Son OS=Mus musculus GN=Donson PE=2 SV=1 - [DONSON_MOUSE]                             | 7.36  | 7 | 2  | 2  | 3    | 0.699 | 2.372 | 1.944 | 1.264 | 6.04    | 7.36  | 2  | 3    | 489  | 54.2  | 7.78  |
| P10922   | Histone H1.0 OS=Mus musculus GN=H1f0 PE=2 SV=4 - [H10_MOUSE]                                                        | 43.81 | 1 | 11 | 11 | 46   | 0.640 | 1.365 | 1.161 | 1.264 | 109.34  | 43.81 | 16 | 46   | 194  | 20.8  | 10.90 |
| Q3U1Y4   | DENN domain-containing protein 4B OS=Mus musculus GN=Dennd4b PE=2 SV=2 - [DENND4B_MOUSE]                            | 12.61 | 6 | 13 | 13 | 38   | 1.195 | 0.851 | 1.100 | 1.264 | 124.54  | 12.61 | 22 | 38   | 1499 | 164.6 | 7.71  |
| P97290   | Plasma protease C1 inhibitor OS=Mus musculus GN=Serp1 PE=1 SV=3 - [SERP1_MOUSE]                                     | 12.10 | 2 | 5  | 5  | 13   | 1.493 | 1.608 | 0.618 | 1.264 | 49.19   | 12.10 | 9  | 13   | 504  | 55.5  | 6.29  |
| Q5SX40   | Myosin-1 OS=Mus musculus GN=Myh1 PE=1 SV=1 - [MYH1_MOUSE]                                                           | 4.53  | 2 | 2  | 7  | 24   | 1.512 | 1.295 | 1.322 | 1.264 | 48.89   | 4.53  | 9  | 24   | 1942 | 223.2 | 5.76  |
| Q8VCM3   | Zinc finger FYVE domain-containing protein 21 OS=Mus musculus GN=Zfyve21 PE=2 SV=2 - [ZFY21_MOUSE]                  | 17.95 | 1 | 4  | 5  | 9    | 1.441 | 0.798 | 0.970 | 1.265 | 24.23   | 17.95 | 7  | 9    | 234  | 26.0  | 8.34  |
| Q8CGB6-2 | Isoform 2 of Tensin-like C1 domain-containing phosphatase OS=Mus musculus GN=Tenc1 - [TENC1_MOUSE]                  | 12.27 | 4 | 9  | 11 | 21   | 0.929 | 2.198 | 1.226 | 1.265 | 66.92   | 12.27 | 18 | 21   | 1377 | 149.4 | 8.34  |

|          |                                                                                                                   |       |    |    |     |      |       |       |       |       |         |       |     |      |      |       |       |
|----------|-------------------------------------------------------------------------------------------------------------------|-------|----|----|-----|------|-------|-------|-------|-------|---------|-------|-----|------|------|-------|-------|
| P17879   | Heat shock 70 kDa protein 1B OS=Mus musculus GN=Hspa1b PE=1 SV=3 - [H571B_MOUSE]                                  | 55.30 | 2  | 13 | 32  | 380  | 0.771 | 2.374 | 1.214 | 1.265 | 985.95  | 55.30 | 55  | 380  | 642  | 70.1  | 5.72  |
| Q8CIA5-2 | Isoform 2 of UDP-xylose and UDP-N-acetylglucosamine transporter OS=Mus musculus GN=Slc35b4 - [P7444_MOUSE]        | 18.87 | 2  | 1  | 1   | 1    | 1.085 | 1.004 | 1.289 | 1.265 | 0.00    | 18.87 | 1   | 1    | 159  | 18.6  | 8.41  |
| Q8VC42   | Uncharacterized protein C18orf8 homolog OS=Mus musculus GN=Mic1 PE=2 SV=1 - [MIC1_MOUSE]                          | 17.20 | 3  | 8  | 8   | 14   | 0.744 | 1.242 | 1.153 | 1.265 | 38.34   | 17.20 | 12  | 14   | 657  | 74.9  | 7.83  |
| Q8K010   | 5-oxoprolinase OS=Mus musculus GN=Oplah PE=2 SV=1 - [OPLA_MOUSE]                                                  | 32.45 | 5  | 32 | 34  | 111  | 0.937 | 1.465 | 1.143 | 1.265 | 361.03  | 32.45 | 60  | 111  | 1288 | 137.5 | 6.28  |
| A2AQ49   | Protein Neb OS=Mus musculus GN=Neb PE=2 SV=1 - [A2AQ49_MOUSE]                                                     | 1.51  | 5  | 7  | 8   | 8    | 2.650 | 1.480 | 1.360 | 1.265 | 13.79   | 1.51  | 8   | 8    | 6909 | 800.1 | 9.09  |
| Q14B11   | Protein Slc24a2 OS=Mus musculus GN=Slc24a2 PE=2 SV=1 - [Q14B11_MOUSE]                                             | 16.17 | 1  | 2  | 8   | 98   | 0.870 | 0.685 | 1.255 | 1.266 | 240.07  | 16.17 | 14  | 98   | 711  | 78.9  | 6.20  |
| Q8BWW3   | Phosphoacetylglucosamine mutase OS=Mus musculus GN=Pgm3 PE=2 SV=1 - [Q8BWW3_MOUSE]                                | 43.51 | 2  | 17 | 17  | 54   | 0.702 | 1.154 | 1.005 | 1.266 | 150.53  | 43.51 | 26  | 54   | 501  | 55.0  | 6.29  |
| Q8CF15   | Probable proline-tRNA ligase, mitochondrial OS=Mus musculus GN=Pars2 PE=2 SV=2 - [SYPM_MOUSE]                     | 22.74 | 3  | 8  | 8   | 17   | 1.280 | 1.369 | 1.503 | 1.266 | 57.85   | 22.74 | 12  | 17   | 475  | 53.5  | 7.84  |
| F8WGT1   | Adenosylhomocysteinase OS=Mus musculus GN=Ahcy2 PE=2 SV=1 - [F8WGT1_MOUSE]                                        | 45.42 | 11 | 2  | 33  | 258  | 0.535 | 0.844 | 1.074 | 1.266 | 684.04  | 45.42 | 60  | 258  | 612  | 66.7  | 7.36  |
| A2A9Y7   | Cytochrome P450 4X1 OS=Mus musculus GN=Cyp4x1 PE=2 SV=1 - [A2A9Y7_MOUSE]                                          | 8.52  | 2  | 4  | 4   | 5    | 0.957 | 1.406 | 1.223 | 1.266 | 13.03   | 8.52  | 5   | 5    | 481  | 55.5  | 7.21  |
| Q07797   | Galectin-3-binding protein OS=Mus musculus GN=Lgals3bp PE=1 SV=1 - [LG3BP_MOUSE]                                  | 15.25 | 2  | 7  | 7   | 17   | 1.761 | 1.378 | 0.995 | 1.266 | 50.71   | 15.25 | 13  | 17   | 577  | 64.4  | 5.14  |
| P97477   | Aurora kinase A OS=Mus musculus GN=Aurka PE=1 SV=1 - [AURKA_MOUSE]                                                | 11.14 | 2  | 2  | 2   | 2    | 0.392 | 0.722 | 0.984 | 1.266 | 2.30    | 11.14 | 2   | 2    | 395  | 44.7  | 9.38  |
| Q00915   | Retinol-binding protein 1 OS=Mus musculus GN=Rbp1 PE=2 SV=2 - [RET1_MOUSE]                                        | 68.15 | 1  | 8  | 9   | 36   | 0.939 | 3.198 | 1.140 | 1.267 | 122.14  | 68.15 | 16  | 36   | 135  | 15.8  | 5.25  |
| Q9CQ26   | NADH dehydrogenase [ubiquinone] 1 beta subcomplex subunit 3 OS=Mus musculus GN=Ndufb3 PE=1 SV=1 - [NNDUFB3_MOUSE] | 17.31 | 1  | 2  | 2   | 16   | 0.818 | 1.051 | 1.166 | 1.267 | 31.81   | 17.31 | 4   | 16   | 104  | 11.7  | 9.04  |
| E9QP49   | Eh domain-binding protein 1-like protein 1 OS=Mus musculus GN=Ehbp111 PE=2 SV=1 - [E9QP49_MOUSE]                  | 8.09  | 7  | 8  | 9   | 14   | 1.501 | 1.558 | 0.963 | 1.267 | 33.08   | 8.09  | 12  | 14   | 1718 | 184.7 | 4.74  |
| Q9D7J4   | Cytochrome c oxidase protein 2D homolog OS=Mus musculus GN=Cox20 PE=2 SV=1 - [COX20_MOUSE]                        | 22.22 | 1  | 2  | 2   | 5    | 0.829 | 1.044 | 1.047 | 1.267 | 11.22   | 22.22 | 4   | 5    | 117  | 13.2  | 9.01  |
| O54830-2 | Isoform 2 of Prolactin-7A1 OS=Mus musculus GN=Prl7a1 - [PR7A1_MOUSE]                                              | 7.17  | 2  | 1  | 1   | 3    | 1.449 | 1.102 | 1.067 | 1.267 | 0.00    | 7.17  | 1   | 3    | 265  | 29.9  | 4.56  |
| Q91Y57   | Sialic acid-binding Ig-like lectin 12 OS=Mus musculus GN=Siglec12 PE=1 SV=3 -                                     | 1.71  | 1  | 1  | 1   | 1    | 1.132 | 1.259 | 1.006 | 1.267 | 2.51    | 1.71  | 1   | 1    | 467  | 51.9  | 7.84  |
| Q99PP6-3 | Isoform Gamma of Tripartite motif-containing protein 34A OS=Mus musculus GN=Trim34a - [TR34A_MOUSE]               | 4.91  | 6  | 1  | 1   | 1    | 0.624 | 0.229 | 1.721 | 1.267 | 3.58    | 4.91  | 1   | 1    | 326  | 37.6  | 8.44  |
| Q9CR53   | Neuromedin-B OS=Mus musculus GN=Nmb PE=2 SV=1 - [NMB_MOUSE]                                                       | 7.44  | 2  | 1  | 1   | 2    | 1.969 | 7.014 | 1.925 | 1.267 | 7.91    | 7.44  | 2   | 2    | 121  | 13.6  | 11.72 |
| O35219   | Potassium voltage-gated channel subfamily H member 2 OS=Mus musculus GN=Kcnh2 PE=2 SV=2 - [KCNH2_MOUSE]           | 11.02 | 4  | 10 | 10  | 20   | 1.177 | 0.963 | 0.992 | 1.267 | 61.14   | 11.02 | 14  | 20   | 1162 | 126.8 | 7.78  |
| Q8C8R3-2 | Isoform 2 of Ankyrin-2 OS=Mus musculus GN=Ank2 - [ANK2_MOUSE]                                                     | 54.02 | 2  | 6  | 171 | 1396 | 0.800 | 1.078 | 1.206 | 1.268 | 4047.97 | 54.02 | 301 | 1396 | 3926 | 428.5 | 5.16  |
| Q9JH8    | ICOS ligand OS=Mus musculus GN=Icoslg PE=1 SV=1 - [ICOSL_MOUSE]                                                   | 10.25 | 2  | 3  | 3   | 3    | 1.054 | 1.357 | 1.319 | 1.268 | 4.32    | 10.25 | 3   | 3    | 322  | 35.9  | 7.91  |
| F6TQG5   | Adenosine deaminase domain-containing protein 1 (Fragment) OS=Mus musculus GN=Adad1 PE=4 SV=1 - [F6TQG5_MOUSE]    | 10.95 | 4  | 1  | 1   | 1    | 1.552 | 1.457 | 2.029 | 1.268 | 0.00    | 10.95 | 1   | 1    | 201  | 22.5  | 8.63  |
| Q04899   | Cyclin-dependent kinase 18 OS=Mus musculus GN=Cdk18 PE=1 SV=1 - [CDK18_MOUSE]                                     | 36.14 | 17 | 10 | 16  | 65   | 0.869 | 1.319 | 1.096 | 1.268 | 166.85  | 36.14 | 27  | 65   | 451  | 51.8  | 8.51  |

|          |                                                                                                                                  |       |   |    |    |      |       |       |       |       |          |       |     |      |      |       |      |
|----------|----------------------------------------------------------------------------------------------------------------------------------|-------|---|----|----|------|-------|-------|-------|-------|----------|-------|-----|------|------|-------|------|
| Q60857   | Sodium-dependent serotonin transporter<br>OS=Mus musculus<br>GN=Slc6a4 PE=1 SV=4 - [SC6A4_MOUSE]                                 | 3.97  | 1 | 2  | 2  | 10   | 0.529 | 0.699 | 1.026 | 1.268 | 34.85    | 3.97  | 4   | 10   | 630  | 70.0  | 6.18 |
| G5E8R3   | Pyruvate carboxylase<br>OS=Mus musculus<br>GN=Pcx PE=3 SV=1 - [G5E8R3_MOUSE]                                                     | 52.80 | 3 | 50 | 51 | 306  | 0.820 | 0.849 | 1.021 | 1.268 | 928.20   | 52.80 | 91  | 306  | 1178 | 129.6 | 6.71 |
| Q8BGE4   | Protein 4933426M11Rik<br>OS=Mus musculus<br>GN=4933426M11Rik PE=2 SV=1 - [Q8BGE4_MOUSE]                                          | 4.64  | 1 | 1  | 1  | 4    | 1.238 | 1.042 | 1.151 | 1.269 | 12.84    | 4.64  | 2   | 4    | 302  | 32.0  | 5.00 |
| Q61205   | Platelet-activating factor acetylhydrolase 1B subunit gamma OS=Mus musculus<br>GN=Pafah1b3 PE=1 SV=1 - [PA1B3_MOUSE]             | 18.97 | 4 | 6  | 6  | 27   | 0.918 | 0.941 | 0.689 | 1.269 | 62.33    | 18.97 | 12  | 27   | 232  | 25.8  | 6.93 |
| Q810Y8   | PRAME17 OS=Mus musculus<br>GN=Pramel7 PE=2 SV=1 - [Q810Y8_MOUSE]                                                                 | 1.67  | 1 | 1  | 1  | 1    | 1.478 | 1.001 | 1.237 | 1.269 | 2.19     | 1.67  | 1   | 1    | 479  | 55.8  | 7.24 |
| E9QG3    | Protein Srap OS=Mus musculus<br>GN=Srap PE=2 SV=1 - [E9QG3_MOUSE]                                                                | 5.34  | 1 | 2  | 2  | 5    | 1.385 | 0.981 | 2.485 | 1.269 | 13.64    | 5.34  | 2   | 5    | 431  | 45.3  | 9.83 |
| Q9CZ13   | Cytochrome b-c1 complex subunit 1, mitochondrial<br>OS=Mus musculus<br>GN=Uqcrc1 PE=1 SV=2 - [QCR1_MOUSE]                        | 52.29 | 1 | 18 | 19 | 504  | 0.995 | 1.135 | 1.168 | 1.269 | 1366.00  | 52.29 | 34  | 504  | 480  | 52.8  | 6.21 |
| Q3U1N2-2 | Isoform 2 of Sterol regulatory element-binding protein 2 OS=Mus musculus<br>GN=Sreb2 - [SRBP2_MOUSE]                             | 2.01  | 2 | 2  | 3  | 4    | 1.205 | 1.325 | 1.437 | 1.269 | 6.83     | 2.01  | 4   | 4    | 1096 | 119.8 | 8.32 |
| Q6R0H7-4 | Isoform XLas-4 of Guanine nucleotide-binding protein G(s) subunit alpha isoforms XLas OS=Mus musculus<br>GN=Gnas - [GNAS1_MOUSE] | 22.79 | 7 | 13 | 21 | 165  | 0.545 | 1.246 | 0.951 | 1.269 | 462.21   | 22.79 | 35  | 165  | 1119 | 120.0 | 4.83 |
| Q91XE8   | Transmembrane protein 205 OS=Mus musculus<br>GN=Tmem205 PE=1 SV=1 - [TM205_MOUSE]                                                | 17.46 | 1 | 3  | 3  | 13   | 0.796 | 0.809 | 0.806 | 1.269 | 41.54    | 17.46 | 5   | 13   | 189  | 21.2  | 9.42 |
| P16332   | Methylmalonyl-CoA mutase, mitochondrial<br>OS=Mus musculus<br>GN=Mut PE=2 SV=2 - [MUTA_MOUSE]                                    | 44.52 | 1 | 24 | 24 | 86   | 0.990 | 1.481 | 1.194 | 1.269 | 266.26   | 44.52 | 40  | 86   | 748  | 82.8  | 6.89 |
| Q3TC72   | Fumarylacetoacetate hydrolase domain-containing protein 2A<br>OS=Mus musculus<br>GN=Fahd2 PE=1 SV=1 - [FAHD2_MOUSE]              | 64.22 | 1 | 14 | 14 | 67   | 1.724 | 1.433 | 1.097 | 1.269 | 248.21   | 64.22 | 21  | 67   | 313  | 34.7  | 8.16 |
| O55226   | Chondroadherin OS=Mus musculus<br>GN=Chad PE=2 SV=1 - [CHAD_MOUSE]                                                               | 3.91  | 1 | 2  | 2  | 7    | 0.789 | 0.556 | 0.950 | 1.269 | 14.07    | 3.91  | 2   | 7    | 358  | 40.3  | 9.39 |
| A3KFX0   | Cytosolic 5'-nucleotidase 1A OS=Mus musculus<br>GN=Nt5c1a PE=2 SV=1 - [NT1A_MOUSE]                                               | 33.42 | 1 | 9  | 10 | 25   | 1.091 | 1.166 | 0.924 | 1.269 | 78.81    | 33.42 | 18  | 25   | 365  | 40.7  | 7.06 |
| P01786   | Ig heavy chain V region MOPC 47A OS=Mus musculus<br>PE=1 SV=1 - [HVM17_MOUSE]                                                    | 13.68 | 9 | 1  | 1  | 2    | 1.334 | 1.703 | 0.664 | 1.269 | 7.02     | 13.68 | 2   | 2    | 117  | 13.0  | 8.84 |
| P29758   | Ornithine aminotransferase, mitochondrial OS=Mus musculus<br>GN=Oat PE=1 SV=1 - [OAT_MOUSE]                                      | 51.03 | 3 | 20 | 21 | 82   | 1.545 | 1.466 | 1.012 | 1.270 | 256.96   | 51.03 | 35  | 82   | 439  | 48.3  | 6.62 |
| Q8BVZ5   | Interleukin-33 OS=Mus musculus<br>GN=Il33 PE=1 SV=1 - [IL33_MOUSE]                                                               | 10.53 | 3 | 2  | 2  | 5    | 1.671 | 1.504 | 1.270 | 1.270 | 16.46    | 10.53 | 3   | 5    | 266  | 30.0  | 8.60 |
| Q6PIC6   | Sodium/potassium-transporting ATPase subunit alpha-3 OS=Mus musculus<br>GN=Atp1a3 PE=1 SV=1 - [ATP1A3_MOUSE]                     | 61.30 | 2 | 41 | 71 | 4449 | 0.703 | 0.681 | 1.122 | 1.270 | 13378.25 | 61.30 | 136 | 4449 | 1013 | 111.6 | 5.41 |
| Q6P6N5   | Sprouty-related, EVH1 domain-containing protein 3 OS=Mus musculus<br>GN=Spred3 PE=2 SV=1 - [SPRE3_MOUSE]                         | 3.92  | 1 | 1  | 1  | 3    | 0.860 | 0.975 | 1.497 | 1.270 | 12.79    | 3.92  | 2   | 3    | 408  | 42.8  | 8.34 |
| AZASS6-3 | Isoform 3 of Titin OS=Mus musculus<br>GN=Ttn - [TITIN_MOUSE]                                                                     | 1.53  | 1 | 4  | 5  | 5    | 3.021 | 1.305 | 0.949 | 1.270 | 11.36    | 1.53  | 5   | 5    | 5508 | 618.9 | 5.68 |
| Q922H2   | [Pyruvate dehydrogenase [lipoamide]] kinase isozyme 3, mitochondrial<br>OS=Mus musculus<br>GN=Pdk3 PE=2 SV=1 - [PDK3_MOUSE]      | 32.53 | 1 | 11 | 12 | 51   | 0.728 | 1.224 | 1.259 | 1.270 | 141.84   | 32.53 | 21  | 51   | 415  | 47.9  | 8.82 |
| Q921U8-2 | Isoform L2 of Smoothelin OS=Mus musculus<br>GN=Smtn - [SMTN_MOUSE]                                                               | 15.31 | 7 | 12 | 12 | 24   | 0.734 | 2.466 | 0.880 | 1.271 | 62.20    | 15.31 | 17  | 24   | 921  | 100.1 | 8.81 |
| Q9ET80   | Junctophilin-1 OS=Mus musculus<br>GN=Jph1 PE=1 SV=1 - [JPH1_MOUSE]                                                               | 13.94 | 1 | 7  | 8  | 14   | 1.167 | 1.293 | 3.205 | 1.271 | 36.74    | 13.94 | 9   | 14   | 660  | 71.9  | 9.22 |

|          |                                                                                                                                        |       |   |    |    |     |       |       |       |       |        |       |    |     |      |       |      |
|----------|----------------------------------------------------------------------------------------------------------------------------------------|-------|---|----|----|-----|-------|-------|-------|-------|--------|-------|----|-----|------|-------|------|
| O35598   | Disintegrin and metalloproteinase domain-containing protein 10<br>OS=Mus musculus<br>GN=Adam10 PE=1 SV=2 - [FAM107_MOUSE]              | 20.69 | 3 | 13 | 13 | 49  | 1.151 | 0.890 | 1.086 | 1.271 | 137.81 | 20.69 | 22 | 49  | 749  | 83.9  | 7.94 |
| Q80Z38   | EF-hand calcium-binding domain-containing protein 4A<br>OS=Mus musculus<br>GN=Efcab4a PE=2 SV=2 - [EFC4A_MOUSE]                        | 8.63  | 3 | 2  | 3  | 5   | 2.018 | 3.306 | 1.550 | 1.271 | 13.02  | 8.63  | 5  | 5   | 394  | 44.4  | 5.20 |
| Q810F8-2 | Isoform 2 of T-box transcription factor TBX10<br>OS=Mus musculus<br>GN=Tx10 - [TBX10_MOUSE]                                            | 5.81  | 2 | 2  | 2  | 2   | 1.511 | 0.845 | 1.083 | 1.271 | 5.39   | 5.81  | 2  | 2   | 344  | 38.1  | 9.39 |
| Q92359   | Ras-related protein Rab-30<br>OS=Mus musculus<br>GN=Rab30 PE=2 SV=1 - [RAB30_MOUSE]                                                    | 36.95 | 2 | 4  | 7  | 64  | 0.720 | 1.013 | 1.037 | 1.271 | 193.59 | 36.95 | 11 | 64  | 203  | 23.0  | 4.97 |
| Q6GQV0-2 | Isoform 2 of Uncharacterized protein C16orf59 homolog<br>OS=Mus musculus - [C16orf59_MOUSE]                                            | 4.78  | 2 | 1  | 1  | 1   | 1.711 | 1.198 | 1.245 | 1.272 | 3.08   | 4.78  | 1  | 1   | 251  | 27.7  | 6.52 |
| Q80U23   | Syntrophin OS=Mus musculus<br>GN=Snph PE=1 SV=3 - [SNPH_MOUSE]                                                                         | 35.96 | 3 | 10 | 12 | 43  | 0.711 | 0.844 | 1.298 | 1.272 | 135.91 | 35.96 | 21 | 43  | 495  | 53.7  | 5.90 |
| P28654   | Decorin OS=Mus musculus<br>GN=Dcn PE=2 SV=1 - [FACD_MOUSE]                                                                             | 25.99 | 1 | 7  | 8  | 20  | 1.636 | 5.846 | 0.963 | 1.272 | 53.92  | 25.99 | 14 | 20  | 354  | 39.8  | 8.68 |
| Q8BLY3   | Leucine-rich repeat and fibronectin type-III domain containing protein 3<br>OS=Mus musculus<br>GN=Lrfr3 PE=1 SV=1 - [LRF3_MOUSE]       | 8.95  | 1 | 3  | 4  | 10  | 1.170 | 1.411 | 1.174 | 1.272 | 30.98  | 8.95  | 6  | 10  | 626  | 66.0  | 7.08 |
| Q9WU39   | Amiloride-sensitive sodium channel subunit gamma<br>OS=Mus musculus<br>GN=Scn1g PE=1 SV=1 - [SCN1G_MOUSE]                              | 2.75  | 1 | 1  | 1  | 1   | 0.735 | 1.233 | 1.349 | 1.272 | 3.50   | 2.75  | 1  | 1   | 655  | 74.6  | 7.47 |
| Q80X13-2 | Isoform 2 of Eukaryotic translation initiation factor 4 gamma 3<br>OS=Mus musculus<br>GN=Eif4g3 - [IF4G3_MOUSE]                        | 29.87 | 6 | 1  | 39 | 155 | 0.944 | 1.039 | 1.130 | 1.272 | 437.82 | 29.87 | 70 | 155 | 1560 | 172.8 | 5.50 |
| P70193   | Leucine-rich repeats and immunoglobulin-like domains protein 1<br>OS=Mus musculus<br>GN=Lrig1 PE=2 SV=2 - [LRIG1_MOUSE]                | 10.72 | 1 | 10 | 10 | 16  | 0.822 | 0.651 | 0.740 | 1.272 | 51.29  | 10.72 | 14 | 16  | 1091 | 119.1 | 6.86 |
| M0QWX4   | Sentrin-specific protease 1<br>OS=Mus musculus<br>GN=Senp1 PE=4 SV=1 - [M0QWX4_MOUSE]                                                  | 6.31  | 3 | 2  | 3  | 13  | 1.107 | 1.192 | 1.156 | 1.272 | 24.83  | 6.31  | 4  | 13  | 666  | 75.5  | 8.59 |
| P35486   | Pyruvate dehydrogenase E1 component subunit alpha, somatic form, mitochondrial<br>OS=Mus musculus<br>GN=Pdh1 PE=1 SV=1 - [ODPA_MOUSE]  | 75.13 | 1 | 29 | 30 | 332 | 0.789 | 1.075 | 1.193 | 1.272 | 832.83 | 75.13 | 54 | 332 | 390  | 43.2  | 8.19 |
| F6XCE3   | Myosin regulatory light chain 2, ventricular/cardiac muscle isoform (Fragment)<br>OS=Mus musculus<br>GN=My2 PE=4 SV=1 - [F6XCE3_MOUSE] | 17.74 | 5 | 1  | 1  | 1   | 1.686 | 1.251 | 1.009 | 1.273 | 0.00   | 17.74 | 1  | 1   | 62   | 7.2   | 5.99 |
| F6SBP3   | Serine/threonine-protein kinase SIK3 (Fragment)<br>OS=Mus musculus<br>GN=Si3 PE=4 SV=1 - [F6SBP3_MOUSE]                                | 49.30 | 1 | 1  | 2  | 2   | 1.404 | 1.477 | 1.078 | 1.273 | 1.76   | 49.30 | 2  | 2   | 71   | 7.7   | 4.28 |
| P51450-2 | Isoform 2 of Nuclear receptor ROR-gamma<br>OS=Mus musculus<br>GN=Rorc - [RORC_MOUSE]                                                   | 5.25  | 5 | 2  | 3  | 3   | 1.092 | 1.258 | 1.499 | 1.273 | 2.51   | 5.25  | 3  | 3   | 495  | 55.7  | 7.72 |
| O35600   | Retinal-specific ATP-binding cassette transporter OS=Mus musculus<br>GN=Abca4 PE=2 SV=1 - [ABCA4_MOUSE]                                | 1.17  | 1 | 1  | 3  | 6   | 1.033 | 1.201 | 1.522 | 1.273 | 10.41  | 1.17  | 5  | 6   | 2310 | 260.0 | 6.20 |
| Q9CPU2   | NADH dehydrogenase [ubiquinone] 1 beta subcomplex subunit 2, mitochondrial<br>OS=Mus musculus<br>GN=Ndufb2 PE=3 SV=1 - [NDUB2_MOUSE]   | 8.57  | 1 | 2  | 2  | 3   | 1.493 | 1.078 | 1.240 | 1.273 | 5.04   | 8.57  | 3  | 3   | 105  | 12.0  | 6.52 |
| Q8R3P0   | Aspartoacylase OS=Mus musculus<br>GN=Aspa PE=1 SV=2 - [ACY2_MOUSE]                                                                     | 37.82 | 3 | 10 | 10 | 54  | 2.704 | 0.360 | 1.005 | 1.273 | 171.79 | 37.82 | 17 | 54  | 312  | 35.3  | 6.58 |
| D3Z1B2   | MCG50540 OS=Mus musculus<br>GN=Gm4953 PE=4 SV=1 - [D3Z1B2_MOUSE]                                                                       | 16.15 | 1 | 1  | 3  | 19  | 0.988 | 0.835 | 1.475 | 1.273 | 48.26  | 16.15 | 5  | 19  | 161  | 18.5  | 5.44 |
| Q3TMH2   | Secemin-3 OS=Mus musculus<br>GN=Scm3 PE=1 SV=1 - [SCRN3_MOUSE]                                                                         | 32.30 | 2 | 14 | 15 | 58  | 1.234 | 1.084 | 1.240 | 1.273 | 160.47 | 32.30 | 25 | 58  | 418  | 47.6  | 5.66 |
| Q8BGY9   | High affinity choline transporter 1 OS=Mus musculus<br>GN=Slc5a7 PE=1 SV=1 - [SLC5A7_MOUSE]                                            | 5.00  | 1 | 3  | 3  | 6   | 0.701 | 0.660 | 1.885 | 1.274 | 17.53  | 5.00  | 6  | 6   | 580  | 63.3  | 5.33 |
| Q9J119   | Acidic fibroblast growth factor intracellular-binding protein OS=Mus musculus<br>GN=Flbp PE=2 SV=1 - [FIBP_MOUSE]                      | 32.49 | 2 | 10 | 10 | 34  | 0.740 | 1.283 | 1.099 | 1.274 | 115.14 | 32.49 | 18 | 34  | 357  | 41.2  | 6.76 |

|          |                                                                                                                              |       |    |    |    |     |       |       |       |       |         |       |    |     |      |       |      |
|----------|------------------------------------------------------------------------------------------------------------------------------|-------|----|----|----|-----|-------|-------|-------|-------|---------|-------|----|-----|------|-------|------|
| E9QMK2   | Vesican core protein OS=Mus musculus GN=Vcan PE=2 SV=1 - [E9QMK2_MOUSE]                                                      | 18.33 | 8  | 1  | 27 | 209 | 1.619 | 0.753 | 1.774 | 1.274 | 591.22  | 18.33 | 48 | 209 | 1615 | 178.4 | 4.96 |
| Q63844   | Mitogen-activated protein kinase 3 OS=Mus musculus GN=Mapk3 PE=1 SV=5 -                                                      | 55.00 | 11 | 14 | 22 | 237 | 1.010 | 2.237 | 1.176 | 1.274 | 599.67  | 55.00 | 44 | 237 | 380  | 43.0  | 6.61 |
| D6RH74   | UPF0462 protein C4orf33 homolog OS=Mus musculus GN=D3Erd751e PE=2 SV=1 -                                                     | 32.93 | 4  | 3  | 3  | 8   | 1.843 | 0.954 | 1.148 | 1.274 | 18.27   | 32.93 | 6  | 8   | 82   | 9.4   | 4.41 |
| E9PVV3   | Potassium voltage-gated channel subfamily C member 1 OS=Mus musculus GN=Kcnc1 PE=2 SV=1 - [E9PVV3_MOUSE]                     | 16.58 | 2  | 6  | 8  | 28  | 0.727 | 0.435 | 1.013 | 1.275 | 80.51   | 16.58 | 12 | 28  | 585  | 65.8  | 6.18 |
| Q9CQJ8   | NADH dehydrogenase [ubiquinone] 1 beta subcomplex subunit 9 OS=Mus musculus GN=Ndufb9 PE=1 SV=3 - [Q9CQJ8_MOUSE]             | 56.98 | 1  | 7  | 7  | 137 | 0.842 | 0.960 | 1.122 | 1.275 | 356.37  | 56.98 | 13 | 137 | 179  | 22.0  | 7.80 |
| P52875   | Transmembrane protein 165 OS=Mus musculus GN=Trmem165 PE=2 SV=2 - [TM165_MOUSE]                                              | 7.74  | 1  | 1  | 1  | 4   | 3.073 | 1.435 | 1.398 | 1.275 | 7.75    | 7.74  | 1  | 4   | 323  | 34.8  | 7.46 |
| Q6PE15   | Mycophenolic acid acyl-glucuronide esterase, mitochondrial OS=Mus musculus GN=Abhd10 PE=2 SV=1 - [Q6PE15_MOUSE]              | 34.01 | 3  | 10 | 10 | 39  | 1.160 | 0.813 | 0.955 | 1.275 | 116.54  | 34.01 | 17 | 39  | 297  | 33.0  | 8.79 |
| Q5SQX6   | Cytoplasmic FMR1-interacting protein 2 OS=Mus musculus GN=Cyrip2 PE=1 SV=2 - [CYFP2_MOUSE]                                   | 37.51 | 1  | 1  | 48 | 254 | 1.411 | 1.721 | 1.133 | 1.275 | 725.08  | 37.51 | 88 | 254 | 1253 | 145.6 | 7.05 |
| P50571   | Gamma-aminobutyric acid receptor subunit beta-1 OS=Mus musculus GN=Gabbr1 PE=1 SV=1 - [GBRB1_MOUSE]                          | 22.57 | 2  | 5  | 8  | 34  | 0.844 | 1.459 | 1.032 | 1.276 | 113.02  | 22.57 | 13 | 34  | 474  | 54.1  | 8.78 |
| Q9Z2Q6   | Septin-5 OS=Mus musculus GN=Sept5 PE=1 SV=2 - [SEPT5_MOUSE]                                                                  | 69.65 | 5  | 22 | 25 | 245 | 0.786 | 1.504 | 1.550 | 1.276 | 704.98  | 69.65 | 45 | 245 | 369  | 42.7  | 6.67 |
| Q9DC42   | CD97 antigen OS=Mus musculus GN=Cd97 PE=2 SV=1 - [Q9DC42_MOUSE]                                                              | 4.29  | 6  | 2  | 2  | 2   | 0.773 | 1.039 | 1.014 | 1.276 | 4.60    | 4.29  | 2  | 2   | 722  | 80.1  | 7.27 |
| Q76N33   | AMSH-like protease OS=Mus musculus GN=Stamp11 PE=2 SV=1 [STALP_MOUSE]                                                        | 16.74 | 4  | 5  | 6  | 18  | 1.367 | 1.197 | 0.892 | 1.276 | 43.32   | 16.74 | 9  | 18  | 436  | 49.6  | 7.53 |
| Q61235   | Beta-2-syntrophin OS=Mus musculus GN=Sntb2 PE=1 SV=2 - [SNTB2_MOUSE]                                                         | 22.31 | 1  | 9  | 11 | 25  | 0.827 | 2.186 | 1.252 | 1.276 | 68.26   | 22.31 | 17 | 25  | 520  | 56.3  | 8.69 |
| Q8BY19   | Tenascin-R OS=Mus musculus GN=Thr PE=1 SV=2 - [TENR_MOUSE]                                                                   | 41.61 | 4  | 45 | 46 | 492 | 1.525 | 1.365 | 1.444 | 1.276 | 1455.53 | 41.61 | 82 | 492 | 1358 | 149.5 | 4.94 |
| Q3UUJ4   | STE20-related kinase adapter protein alpha OS=Mus musculus GN=Strada PE=2 SV=1 - [STRAA_MOUSE]                               | 22.74 | 4  | 8  | 8  | 18  | 1.305 | 1.317 | 1.240 | 1.276 | 59.73   | 22.74 | 12 | 18  | 431  | 48.2  | 6.43 |
| Q60673   | Receptor-type tyrosine-protein phosphatase-like N OS=Mus musculus GN=Ptpn PE=2 SV=2 - [PTPRN_MOUSE]                          | 20.33 | 2  | 13 | 14 | 62  | 1.187 | 1.012 | 0.848 | 1.276 | 219.94  | 20.33 | 25 | 62  | 979  | 106.0 | 7.09 |
| Q80T23   | Putative tyrosine-protein phosphatase auxilin OS=Mus musculus GN=Dnajc6 PE=2 SV=2 - [AUX1_MOUSE]                             | 40.94 | 4  | 2  | 30 | 174 | 0.956 | 0.933 | 1.045 | 1.276 | 546.22  | 40.94 | 56 | 174 | 938  | 102.2 | 7.23 |
| P58389   | Serine/threonine-protein phosphatase 2A activator OS=Mus musculus GN=Ppp2r4 PE=1 SV=1 - [PTPA_MOUSE]                         | 58.51 | 6  | 15 | 15 | 120 | 0.736 | 1.285 | 0.947 | 1.277 | 325.33  | 58.51 | 26 | 120 | 323  | 36.7  | 6.39 |
| Q3UNZ8   | Quinone oxidoreductase-like protein 2 OS=Mus musculus PE=2 SV=1 - [QORL2_MOUSE]                                              | 41.43 | 2  | 9  | 9  | 30  | 1.098 | 1.101 | 0.993 | 1.277 | 112.11  | 41.43 | 14 | 30  | 350  | 37.8  | 8.90 |
| D3Z482   | Ankyrin repeat domain-containing protein 26 OS=Mus musculus GN=Ankrd26 PE=4 SV=1 - [D3Z482_MOUSE]                            | 1.84  | 2  | 3  | 3  | 5   | 1.763 | 1.321 | 0.891 | 1.277 | 7.63    | 1.84  | 4  | 5   | 1681 | 192.1 | 5.95 |
| P11276   | Fibronectin OS=Mus musculus GN=Fn1 PE=1 SV=4 - [FINC_MOUSE]                                                                  | 26.60 | 1  | 49 | 49 | 153 | 1.803 | 2.211 | 0.806 | 1.277 | 447.76  | 26.60 | 87 | 153 | 2477 | 272.4 | 5.59 |
| Q8CDV2   | Calcium/calmodulin-dependent 3',5'-cyclic nucleotide phosphodiesterase 1C OS=Mus musculus GN=Pde3c PE=1 SV=1 - [PDE3C_MOUSE] | 6.97  | 6  | 2  | 3  | 16  | 1.328 | 0.775 | 1.485 | 1.277 | 59.01   | 6.97  | 5  | 16  | 603  | 68.3  | 6.89 |
| Q9Z2B9   | Ribosomal protein S6 kinase alpha-4 OS=Mus musculus GN=Rps6ka4 PE=1 SV=2 -                                                   | 10.61 | 1  | 5  | 8  | 15  | 1.000 | 1.026 | 1.066 | 1.277 | 33.06   | 10.61 | 10 | 15  | 773  | 85.6  | 8.27 |
| P18581-2 | Isoform 2 of Low affinity cationic amino acid transporter 2 OS=Mus musculus GN=Slc7a2 - [CTR2_MOUSE]                         | 11.25 | 3  | 5  | 6  | 13  | 0.947 | 0.993 | 1.178 | 1.278 | 47.87   | 11.25 | 9  | 13  | 658  | 71.7  | 6.28 |

|          |                                                                                                        |       |   |    |    |      |       |       |       |       |         |       |    |      |      |       |      |
|----------|--------------------------------------------------------------------------------------------------------|-------|---|----|----|------|-------|-------|-------|-------|---------|-------|----|------|------|-------|------|
| Q8K154-2 | Isoform 2 of Netrin receptor UNC5A OS=Mus musculus GN=Unc5a - [UNC5A_MOUSE]                            | 12.95 | 3 | 7  | 7  | 24   | 1.514 | 1.701 | 1.266 | 1.278 | 76.41   | 12.95 | 13 | 24   | 842  | 92.9  | 6.71 |
| Q9D6M3   | Mitochondrial glutamate carrier 1 OS=Mus musculus GN=Slc25a22 PE=1 SV=1 -                              | 57.28 | 7 | 12 | 15 | 154  | 0.608 | 1.701 | 1.343 | 1.278 | 387.88  | 57.28 | 29 | 154  | 323  | 34.6  | 9.09 |
| P13808-2 | Isoform B1 of Anion exchange protein 2 OS=Mus musculus GN=Slc4a2 -                                     | 7.11  | 5 | 4  | 5  | 8    | 1.458 | 0.663 | 0.891 | 1.278 | 19.83   | 7.11  | 7  | 8    | 1223 | 135.4 | 6.07 |
| Q8BGF8   | Solute carrier family 35 member D3 OS=Mus musculus GN=Slc35d3 PE=2 SV=1 -                              | 5.69  | 1 | 2  | 2  | 5    | 0.568 | 0.654 | 1.424 | 1.279 | 7.06    | 5.69  | 4  | 5    | 422  | 44.9  | 7.33 |
| P09240   | Cholecystokinin OS=Mus musculus GN=Cck PE=1 SV=3 - [CCKN_MOUSE]                                        | 13.91 | 1 | 1  | 2  | 8    | 1.165 | 2.431 | 1.869 | 1.279 | 22.20   | 13.91 | 4  | 8    | 115  | 12.8  | 9.35 |
| Q99LX0   | Protein DJ-1 OS=Mus musculus GN=Park7 PE=1 SV=1 - [PARK7_MOUSE]                                        | 77.78 | 5 | 16 | 16 | 238  | 1.482 | 1.361 | 1.244 | 1.279 | 674.21  | 77.78 | 30 | 238  | 189  | 20.0  | 6.77 |
| Q505B7-2 | Isoform 2 of Protein archease OS=Mus musculus GN=Zbtb8os - [ARCH_MOUSE]                                | 20.55 | 5 | 3  | 3  | 7    | 2.017 | 1.106 | 1.237 | 1.279 | 21.00   | 20.55 | 4  | 7    | 146  | 17.2  | 4.68 |
| A2AU34   | Protein Tmem74b OS=Mus musculus GN=Tmem74b PE=4 SV=1 - [A2AU34_MOUSE]                                  | 17.24 | 1 | 2  | 2  | 6    | 1.027 | 0.791 | 1.013 | 1.279 | 22.09   | 17.24 | 4  | 6    | 232  | 25.0  | 6.79 |
| D3YTZ9   | Protein RIC-3 OS=Mus musculus GN=Ric3 PE=2 SV=1 - [D3YTZ9_MOUSE]                                       | 12.57 | 4 | 3  | 3  | 8    | 1.955 | 1.476 | 1.122 | 1.280 | 25.64   | 12.57 | 4  | 8    | 366  | 40.2  | 5.05 |
| Q8JZQ2   | AFG3-like protein 2 OS=Mus musculus GN=Afg3l2 PE=1 SV=1 - [AFG32_MOUSE]                                | 47.26 | 1 | 32 | 40 | 157  | 0.825 | 1.164 | 1.127 | 1.280 | 445.68  | 47.26 | 69 | 157  | 802  | 89.5  | 8.60 |
| Q5SUR0   | Phosphoribosylformylglycin amidine synthase OS=Mus musculus GN=Pfas PE=2 SV=1 - [PUR4_MOUSE]           | 30.22 | 3 | 28 | 28 | 109  | 0.869 | 0.938 | 0.905 | 1.280 | 325.81  | 30.22 | 50 | 109  | 1337 | 144.5 | 5.67 |
| E9Q7L0   | Protein Ogdl OS=Mus musculus GN=Ogdl PE=2 SV=1 - [E9Q7L0_MOUSE]                                        | 49.27 | 1 | 32 | 41 | 308  | 0.721 | 0.846 | 1.104 | 1.280 | 994.43  | 49.27 | 77 | 308  | 1029 | 116.5 | 6.84 |
| P16858   | Glyceraldehyde-3-phosphate dehydrogenase OS=Mus musculus GN=Gapdh PE=1 SV=2 - [G3P_MOUSE]              | 93.69 | 5 | 7  | 31 | 2111 | 0.683 | 1.066 | 1.208 | 1.280 | 6394.99 | 93.69 | 58 | 2111 | 333  | 35.8  | 8.25 |
| Q9WUH1   | Transmembrane protein 115 OS=Mus musculus GN=Tmem115 PE=1 SV=1 - [TM115_MOUSE]                         | 11.43 | 1 | 2  | 2  | 4    | 1.521 | 0.817 | 1.272 | 1.280 | 15.56   | 11.43 | 3  | 4    | 350  | 38.1  | 7.50 |
| Q8BH44   | Coronin-2B OS=Mus musculus GN=Coro2b PE=2 SV=2 - [COR2B_MOUSE]                                         | 38.96 | 4 | 15 | 15 | 62   | 0.895 | 1.271 | 1.345 | 1.280 | 171.36  | 38.96 | 26 | 62   | 480  | 54.9  | 8.27 |
| Q9QUK3   | Protein CLN8 OS=Mus musculus GN=Cln8 PE=2 SV=1 - [CLN8_MOUSE]                                          | 6.25  | 1 | 1  | 1  | 4    | 0.925 | 0.827 | 0.957 | 1.280 | 13.13   | 6.25  | 2  | 4    | 288  | 33.1  | 8.82 |
| Q9DBM2   | Peroxisomal bifunctional enzyme OS=Mus musculus GN=Ehhadh PE=1 SV=4 - [EHP_MOUSE]                      | 17.97 | 1 | 10 | 10 | 24   | 1.240 | 0.817 | 0.917 | 1.281 | 67.89   | 17.97 | 16 | 24   | 718  | 78.3  | 9.13 |
| P59511   | A disintegrin and metalloproteinase with thrombospondin motifs 20 OS=Mus musculus GN=Adams20 PE=2 SV=2 | 1.15  | 2 | 2  | 2  | 2    | 0.614 | 0.763 | 1.184 | 1.281 | 5.31    | 1.15  | 2  | 2    | 1906 | 211.9 | 7.94 |
| Q3TE80   | Protein 2410002F23Rik OS=Mus musculus GN=2410002F23Rik PE=2 SV=1 - [Q3TE80_MOUSE]                      | 27.82 | 3 | 4  | 4  | 27   | 0.653 | 1.427 | 1.203 | 1.281 | 61.00   | 27.82 | 8  | 27   | 284  | 32.4  | 6.32 |
| Q8CJ53-4 | Isoform 4 of Cdc42-interacting protein 4 OS=Mus musculus GN=Trip10 -                                   | 11.72 | 4 | 5  | 6  | 9    | 1.278 | 1.218 | 1.283 | 1.281 | 18.47   | 11.72 | 8  | 9    | 546  | 62.5  | 5.41 |
| P03899   | NADH-ubiquinone oxidoreductase chain 3 OS=Mus musculus GN=Mtnd3 PE=3 SV=3 - [NU3M_MOUSE]               | 13.04 | 1 | 1  | 1  | 4    | 0.919 | 1.371 | 1.280 | 1.281 | 13.59   | 13.04 | 2  | 4    | 115  | 13.2  | 4.64 |
| Q9DCW4   | Electron transfer flavoprotein subunit beta OS=Mus musculus GN=Etfb PE=1 SV=3 - [ETFB_MOUSE]           | 60.39 | 1 | 16 | 16 | 102  | 1.527 | 1.036 | 1.029 | 1.281 | 308.13  | 60.39 | 30 | 102  | 255  | 27.6  | 8.10 |
| O35435   | Dihydroorotate dehydrogenase (quinone), mitochondrial OS=Mus musculus GN=Dhohd PE=2 SV=2               | 42.28 | 5 | 11 | 12 | 29   | 1.116 | 1.196 | 0.981 | 1.281 | 65.71   | 42.28 | 20 | 29   | 395  | 42.7  | 9.55 |
| P56380   | Bis(5'-nucleosyl)-tetraphosphatase [asymmetrical] OS=Mus musculus GN=Nudt2 PE=1 SV=3 - [AP4A_MOUSE]    | 39.46 | 1 | 6  | 6  | 19   | 1.099 | 1.234 | 1.050 | 1.282 | 48.84   | 39.46 | 10 | 19   | 147  | 17.0  | 6.28 |
| Q8BH64   | EH domain-containing protein 2 OS=Mus musculus GN=Ehd2 PE=1 SV=1 - [EHD2_MOUSE]                        | 29.83 | 2 | 14 | 16 | 41   | 0.788 | 1.876 | 0.886 | 1.282 | 112.78  | 29.83 | 26 | 41   | 543  | 61.1  | 6.51 |
| Q9Z0E8   | Solute carrier family 22 member 5 OS=Mus musculus GN=Slc22a5 PE=1 SV=1 -                               | 5.03  | 4 | 2  | 2  | 5    | 0.647 | 1.037 | 0.847 | 1.282 | 11.21   | 5.03  | 3  | 5    | 557  | 62.7  | 6.79 |



|          |                                                                                                               |       |   |    |    |     |       |       |       |       |         |       |    |     |      |       |      |
|----------|---------------------------------------------------------------------------------------------------------------|-------|---|----|----|-----|-------|-------|-------|-------|---------|-------|----|-----|------|-------|------|
| Q9D9Y8   | RIKEN cDNA 1700025E21, isoform CRA_b OS=Mus musculus GN=Ssmem1 PE=2 SV=1 - [Q9D9Y8_MOUSE]                     | 3.69  | 1 | 1  | 1  | 1   | 0.986 | 1.036 | 0.933 | 1.282 | 2.63    | 3.69  | 1  | 1   | 244  | 27.9  | 7.74 |
| P11260   | Putative transposase element L1Md-A101/L1Md-A102/L1Md-A2 OS=Mus musculus PE=1 SV=2 - [TR22_MOUSE]             | 5.60  | 3 | 1  | 2  | 4   | 0.685 | 1.074 | 2.146 | 1.283 | 9.24    | 5.60  | 3  | 4   | 357  | 41.2  | 9.48 |
| Q8CIZ8   | von Willebrand factor OS=Mus musculus GN=Vwf PE=1 SV=2 - [VWF_MOUSE]                                          | 2.99  | 2 | 6  | 7  | 11  | 1.175 | 1.864 | 1.302 | 1.283 | 35.13   | 2.99  | 11 | 11  | 2813 | 309.1 | 5.50 |
| Q99KX1   | Myeloid leukemia factor 2 OS=Mus musculus GN=MLF2 PE=1 SV=1 - [MLF2_MOUSE]                                    | 12.15 | 1 | 2  | 2  | 27  | 1.216 | 1.606 | 1.762 | 1.283 | 79.89   | 12.15 | 4  | 27  | 247  | 28.0  | 6.98 |
| Q9D8U3   | Endoplasmic reticulum resident protein 27 OS=Mus musculus GN=Erp27 PE=2 SV=1 - [ERP27_MOUSE]                  | 5.51  | 1 | 1  | 1  | 1   | 1.342 | 0.955 | 0.755 | 1.283 | 2.59    | 5.51  | 1  | 1   | 272  | 30.7  | 5.00 |
| Q5F284   | Phospholipid scramblase 3 (Fragment) OS=Mus musculus GN=Plsc3 PE=2 SV=1 - [Q5F284_MOUSE]                      | 12.05 | 2 | 2  | 2  | 7   | 0.702 | 1.207 | 0.944 | 1.283 | 19.75   | 12.05 | 4  | 7   | 224  | 24.0  | 6.35 |
| P97492   | Regulator of G-protein signaling 14 OS=Mus musculus GN=Rgs14 PE=1 SV=2 - [RGS14_MOUSE]                        | 31.99 | 1 | 12 | 13 | 33  | 1.189 | 2.286 | 2.040 | 1.284 | 109.09  | 31.99 | 19 | 33  | 547  | 59.8  | 7.43 |
| E9Q8A5   | Protein Pms1 (Fragment) OS=Mus musculus GN=Pms1 PE=2 SV=1 - [E9Q8A5_MOUSE]                                    | 4.19  | 2 | 1  | 1  | 1   | 0.749 | 1.284 | 1.001 | 1.284 | 2.38    | 4.19  | 1  | 1   | 669  | 74.8  | 6.89 |
| Q8CJ61   | CKLF-like MARVEL transmembrane domain-containing protein 4 OS=Mus musculus GN=Cntm4 PE=2 SV=1 - [CNTM4_MOUSE] | 29.33 | 1 | 4  | 4  | 16  | 0.920 | 1.943 | 1.209 | 1.284 | 29.96   | 29.33 | 5  | 16  | 208  | 22.9  | 5.59 |
| Q62210   | Baculoviral IAP repeat-containing protein 2 OS=Mus musculus GN=Birc2 PE=1 SV=1 - [BIRC2_MOUSE]                | 15.03 | 4 | 8  | 8  | 13  | 1.949 | 1.402 | 1.154 | 1.285 | 26.17   | 15.03 | 13 | 13  | 612  | 69.6  | 6.54 |
| Q5M8N4-2 | Isoform 2 of Epimerase family protein SDR39U1 OS=Mus musculus GN=Sdr39u1 - [SDR39U1_MOUSE]                    | 33.11 | 2 | 9  | 9  | 30  | 0.713 | 0.915 | 1.076 | 1.285 | 85.96   | 33.11 | 14 | 30  | 293  | 31.4  | 9.31 |
| Q8CG76   | Aflatoxin B1 aldehyde reductase member 2 OS=Mus musculus GN=Akr7a2 PE=1 SV=3 - [ARK72_MOUSE]                  | 48.23 | 1 | 14 | 14 | 68  | 1.041 | 1.277 | 1.116 | 1.285 | 204.98  | 48.23 | 26 | 68  | 367  | 40.6  | 8.12 |
| Q5SX79-2 | Isoform 2 of Protein Shroom1 OS=Mus musculus GN=Shroom1 - [SHRM1_MOUSE]                                       | 7.63  | 5 | 4  | 7  | 8   | 1.771 | 0.845 | 2.074 | 1.285 | 15.84   | 7.63  | 8  | 8   | 760  | 83.3  | 7.28 |
| Q80238-3 | Isoform 3 of SH3 and multiple ankyrin repeat domains protein 2 OS=Mus musculus GN=Shank2 - [SHANK2_MOUSE]     | 44.06 | 1 | 1  | 40 | 178 | 1.888 | 1.278 | 1.921 | 1.286 | 560.07  | 44.06 | 70 | 178 | 1262 | 135.3 | 6.04 |
| B7ZC12   | Nebulette OS=Mus musculus GN=Nebi PE=2 SV=1 - [B7ZC12_MOUSE]                                                  | 8.68  | 1 | 2  | 8  | 62  | 1.056 | 0.967 | 1.098 | 1.286 | 180.40  | 8.68  | 14 | 62  | 1014 | 115.9 | 8.51 |
| Q61164   | Transcriptional repressor CTCF OS=Mus musculus GN=Ctcf PE=1 SV=2 - [CTCF_MOUSE]                               | 5.57  | 1 | 5  | 5  | 7   | 1.123 | 0.934 | 0.970 | 1.286 | 19.93   | 5.57  | 7  | 7   | 736  | 83.7  | 6.90 |
| E9Q7T5   | Histamine H3 receptor OS=Mus musculus GN=Hrh3 PE=2 SV=1 - [E9Q7T5_MOUSE]                                      | 5.41  | 5 | 2  | 2  | 11  | 0.456 | 0.826 | 1.519 | 1.286 | 21.84   | 5.41  | 4  | 11  | 407  | 45.3  | 9.25 |
| E9PYH3   | Ethanolamine-phosphate phospho-lyase OS=Mus musculus GN=Agxt2l1 PE=2 SV=1 - [E9PYH3_MOUSE]                    | 33.67 | 2 | 13 | 14 | 37  | 1.010 | 0.518 | 0.876 | 1.287 | 104.01  | 33.67 | 26 | 37  | 493  | 54.8  | 6.87 |
| G5E846   | Peripherin OS=Mus musculus GN=Prph PE=3 SV=1 - [G5E846_MOUSE]                                                 | 42.32 | 5 | 15 | 18 | 75  | 3.764 | 0.497 | 1.067 | 1.287 | 197.84  | 42.32 | 33 | 75  | 475  | 54.3  | 5.52 |
| Q80UW2   | F-box only protein 2 OS=Mus musculus GN=Fbxo2 PE=1 SV=1 - [FBX2_MOUSE]                                        | 39.39 | 1 | 11 | 11 | 36  | 2.291 | 0.844 | 1.096 | 1.287 | 119.20  | 39.39 | 19 | 36  | 297  | 33.7  | 4.28 |
| P61922   | 4-aminobutyrate aminotransferase, mitochondrial OS=Mus musculus GN=Abat PE=1 SV=1 - [GABT_MOUSE]              | 77.00 | 5 | 28 | 28 | 942 | 1.617 | 0.700 | 0.856 | 1.287 | 2698.39 | 77.00 | 53 | 942 | 500  | 56.4  | 8.09 |
| G3X8R1   | Kaptn OS=Mus musculus GN=Kptn PE=4 SV=1 - [G3X8R1_MOUSE]                                                      | 8.84  | 2 | 3  | 3  | 6   | 0.712 | 1.227 | 1.031 | 1.287 | 22.04   | 8.84  | 6  | 6   | 430  | 47.5  | 5.00 |
| R4GMLS   | Dynein intermediate chain 2, axonemal (Fragment) OS=Mus musculus GN=Dnaic2 PE=4 SV=1 - [R4GMLS_MOUSE]         | 5.16  | 2 | 1  | 1  | 1   | 1.755 | 1.427 | 1.830 | 1.288 | 2.48    | 5.16  | 1  | 1   | 562  | 64.2  | 5.20 |
| Q8BYL4   | Tyrosine-tRNA ligase, mitochondrial OS=Mus musculus GN=Yars2 PE=2 SV=2 - [SYYM_MOUSE]                         | 24.15 | 3 | 10 | 10 | 32  | 0.750 | 0.784 | 0.978 | 1.288 | 93.38   | 24.15 | 18 | 32  | 472  | 52.6  | 9.16 |

|          |                                                                                                                      |       |   |    |    |     |       |       |       |       |         |       |    |     |      |       |      |
|----------|----------------------------------------------------------------------------------------------------------------------|-------|---|----|----|-----|-------|-------|-------|-------|---------|-------|----|-----|------|-------|------|
| Q64387   | Prepronociceptin OS=Mus musculus GN=Pnoc PE=2 SV=1 - [PNOX_MOUSE]                                                    | 40.64 | 2 | 7  | 7  | 23  | 0.989 | 0.958 | 0.841 | 1.288 | 67.54   | 40.64 | 10 | 23  | 187  | 20.9  | 8.56 |
| Q8BUV3   | Gephyrin OS=Mus musculus GN=Gphn PE=1 SV=2 - [GEPH_MOUSE]                                                            | 56.31 | 1 | 1  | 30 | 159 | 0.920 | 0.472 | 0.898 | 1.288 | 489.76  | 56.31 | 56 | 159 | 769  | 83.2  | 5.60 |
| Q9DB77   | Cytochrome b-c1 complex subunit 2, mitochondrial OS=Mus musculus GN=Uqcrc2 PE=1 SV=1 - [QCR2_MOUSE]                  | 58.50 | 1 | 25 | 26 | 625 | 0.890 | 1.102 | 1.158 | 1.288 | 1840.08 | 58.50 | 50 | 625 | 453  | 48.2  | 9.25 |
| Q5U5V2   | Hydroxylysine kinase OS=Mus musculus GN=Agphd1 PE=2 SV=2 - [AGPD1_MOUSE]                                             | 14.10 | 2 | 5  | 5  | 8   | 0.931 | 1.477 | 0.927 | 1.288 | 10.56   | 14.10 | 6  | 8   | 376  | 42.3  | 6.02 |
| Q511X5   | RelA-associated inhibitor OS=Mus musculus GN=Ppp1r13l PE=1 SV=1 - [IASPP_MOUSE]                                      | 4.98  | 4 | 3  | 3  | 4   | 1.398 | 1.270 | 1.015 | 1.289 | 11.85   | 4.98  | 4  | 4   | 824  | 88.9  | 6.86 |
| Q8BN58-2 | Isoform 2 of Rho GTPase-activating protein 28 OS=Mus musculus GN=Arhgap28 -                                          | 2.80  | 8 | 1  | 2  | 2   | 2.483 | 1.233 | 1.749 | 1.289 | 5.08    | 2.80  | 2  | 2   | 678  | 76.1  | 6.93 |
| B1AVK5   | Protein Col4a6 OS=Mus musculus GN=Col4a6 PE=2 SV=1 - [B1AVK5_MOUSE]                                                  | 3.19  | 1 | 2  | 3  | 5   | 1.283 | 4.533 | 1.841 | 1.289 | 9.82    | 3.19  | 4  | 5   | 1691 | 163.9 | 9.06 |
| Q9J3R8   | Transmembrane protein 9B OS=Mus musculus GN=Tmem9b PE=1 SV=1 - [TMM9B_MOUSE]                                         | 30.15 | 3 | 5  | 7  | 27  | 0.587 | 1.084 | 1.130 | 1.289 | 63.82   | 30.15 | 12 | 27  | 199  | 22.6  | 8.18 |
| Q3UMF9   | Failed axon connections homolog OS=Mus musculus GN=Faxc PE=2 SV=1 - [FAXC_MOUSE]                                     | 8.56  | 1 | 3  | 3  | 5   | 0.543 | 1.237 | 1.215 | 1.289 | 12.70   | 8.56  | 5  | 5   | 409  | 46.8  | 5.49 |
| Q9DBF1-2 | Isoform 2 of Alpha-aminoadipic semialdehyde dehydrogenase OS=Mus musculus GN=Aldh7a1 - [AL7A1_MOUSE]                 | 42.07 | 6 | 17 | 17 | 102 | 0.629 | 1.282 | 1.063 | 1.289 | 318.81  | 42.07 | 31 | 102 | 511  | 55.6  | 6.40 |
| Q69Z89-2 | Isoform 2 of Ras-associating and dilute domain-containing protein OS=Mus musculus GN=Radil -                         | 5.71  | 7 | 4  | 4  | 7   | 0.851 | 1.146 | 1.105 | 1.289 | 27.05   | 5.71  | 7  | 7   | 1050 | 114.9 | 6.06 |
| E0CYX9   | Coiled-coil domain-containing protein 127 (Fragment) OS=Mus musculus GN=Ccdc127 PE=2 SV=1 -                          | 34.45 | 5 | 6  | 7  | 25  | 1.028 | 1.432 | 1.238 | 1.289 | 66.60   | 34.45 | 11 | 25  | 238  | 27.7  | 8.76 |
| Q64726   | Zinc-alpha-2-glycoprotein OS=Mus musculus GN=Azgp1 PE=1 SV=2 - [ZA2G_MOUSE]                                          | 11.73 | 1 | 3  | 3  | 3   | 1.947 | 2.363 | 0.769 | 1.289 | 8.79    | 11.73 | 3  | 3   | 307  | 35.3  | 6.18 |
| Q14AA6   | MCG49183 OS=Mus musculus GN=1700009N14Rik PE=2 SV=1 - [Q14AA6_MOUSE]                                                 | 37.04 | 2 | 1  | 8  | 81  | 0.686 | 1.047 | 0.967 | 1.290 | 212.06  | 37.04 | 15 | 81  | 216  | 24.3  | 7.97 |
| Q923D2   | Flavin reductase (NADPH) OS=Mus musculus GN=Blvrb PE=2 SV=3 - [BLVRB_MOUSE]                                          | 77.67 | 3 | 10 | 10 | 84  | 2.472 | 1.700 | 0.790 | 1.290 | 306.90  | 77.67 | 19 | 84  | 206  | 22.2  | 7.01 |
| Q9DBB9   | Carboxypeptidase N subunit 2 OS=Mus musculus GN=Cpn2 PE=1 SV=2 - [CPN2_MOUSE]                                        | 11.15 | 1 | 7  | 7  | 10  | 1.123 | 1.329 | 1.000 | 1.290 | 22.80   | 11.15 | 10 | 10  | 547  | 60.4  | 5.88 |
| Q99J08   | SEC14-like protein 2 OS=Mus musculus GN=Sec14l2 PE=2 SV=1 - [S14L2_MOUSE]                                            | 59.80 | 1 | 15 | 18 | 69  | 0.874 | 1.124 | 1.163 | 1.290 | 203.02  | 59.80 | 28 | 69  | 403  | 46.3  | 7.11 |
| Q9WUM5   | Succinyl-CoA ligase (ADP/GDP-forming) subunit alpha, mitochondrial OS=Mus musculus GN=Sucg1 PE=1 SV=4 - [SUCA_MOUSE] | 45.38 | 1 | 10 | 10 | 124 | 1.146 | 0.870 | 1.331 | 1.290 | 416.52  | 45.38 | 18 | 124 | 346  | 36.1  | 9.39 |
| P70392   | Ras-specific guanine nucleotide-releasing factor 2 OS=Mus musculus GN=Rasgrf2 PE=1 SV=2 - [RGRF2_MOUSE]              | 31.54 | 6 | 33 | 39 | 98  | 0.622 | 1.449 | 0.969 | 1.291 | 289.14  | 31.54 | 64 | 98  | 1189 | 135.6 | 7.85 |
| Q9WUB3   | Glycogen phosphorylase, muscle form OS=Mus musculus GN=Pygm PE=1 SV=3 - [PYGM_MOUSE]                                 | 57.48 | 2 | 37 | 50 | 414 | 0.817 | 0.832 | 0.848 | 1.291 | 1114.84 | 57.48 | 94 | 414 | 842  | 97.2  | 7.11 |
| Q60837   | Interleukin-12 receptor subunit beta-1 OS=Mus musculus GN=Il12rb1 PE=1 SV=2 - [I12R1_MOUSE]                          | 2.03  | 1 | 1  | 1  | 1   | 0.604 | 1.469 | 1.273 | 1.291 | 3.17    | 2.03  | 1  | 1   | 738  | 81.7  | 8.18 |
| Q9D7B1   | tRNA-dihydrouridine(20) synthase [NAD(P)+]-like OS=Mus musculus GN=Dus2l PE=1 SV=1 - [DUS2L_MOUSE]                   | 14.20 | 2 | 3  | 4  | 11  | 1.178 | 1.065 | 1.224 | 1.291 | 10.85   | 14.20 | 4  | 11  | 493  | 55.3  | 6.34 |
| Q8BSZ2   | AP-3 complex subunit sigma-2 OS=Mus musculus GN=Ap3s2 PE=1 SV=1 - [AP3S2_MOUSE]                                      | 22.80 | 1 | 4  | 5  | 19  | 1.069 | 1.449 | 1.192 | 1.292 | 52.42   | 22.80 | 9  | 19  | 193  | 22.0  | 5.22 |
| O35074   | Prostacyclin synthase OS=Mus musculus GN=Ptgis PE=2 SV=1 - [PTGIS_MOUSE]                                             | 16.97 | 2 | 7  | 7  | 22  | 0.850 | 4.274 | 0.780 | 1.292 | 59.41   | 16.97 | 11 | 22  | 501  | 57.0  | 6.73 |
| Q80YV4-2 | Isoform 2 of Pantothenate kinase 4 OS=Mus musculus GN=Pank4 - [PANK4_MOUSE]                                          | 25.10 | 4 | 16 | 17 | 49  | 0.789 | 0.865 | 1.108 | 1.292 | 136.27  | 25.10 | 28 | 49  | 773  | 86.3  | 6.39 |

|        |                                                                                                                         |       |   |     |     |     |       |       |       |       |         |       |     |     |      |       |      |
|--------|-------------------------------------------------------------------------------------------------------------------------|-------|---|-----|-----|-----|-------|-------|-------|-------|---------|-------|-----|-----|------|-------|------|
| E9Q784 | Protein Zc3h13 OS=Mus musculus GN=Zc3h13 PE=2 SV=1 - [E9Q784_MOUSE]                                                     | 2.95  | 1 | 4   | 6   | 7   | 3.212 | 2.148 | 0.581 | 1.293 | 13.77   | 2.95  | 7   | 7   | 1729 | 203.6 | 9.38 |
| P41233 | ATP-binding cassette sub-family A member 1 OS=Mus musculus GN=Abca1 PE=1 SV=4 - [ABCA1_MOUSE]                           | 5.26  | 1 | 9   | 11  | 24  | 1.097 | 1.099 | 1.030 | 1.293 | 76.92   | 5.26  | 17  | 24  | 2261 | 253.7 | 6.81 |
| O88398 | Advinin OS=Mus musculus GN=Avil PE=1 SV=2 - [AVIL_MOUSE]                                                                | 6.47  | 1 | 3   | 4   | 5   | 1.259 | 0.955 | 1.304 | 1.293 | 12.13   | 6.47  | 4   | 5   | 819  | 92.0  | 5.54 |
| O88696 | Putative ATP-dependent Clp protease proteolytic subunit, mitochondrial OS=Mus musculus GN=Clpp PE=2 SV=1 - [CLPP_MOUSE] | 31.99 | 1 | 8   | 8   | 73  | 1.060 | 1.249 | 1.041 | 1.293 | 218.10  | 31.99 | 16  | 73  | 272  | 29.8  | 7.47 |
| Q99M15 | Proline-serine-threonine phosphatase-interacting protein 2 OS=Mus musculus GN=Pstpip2 PE=1 SV=4 - [PSTPIP2_MOUSE]       | 5.39  | 1 | 1   | 1   | 2   | 1.244 | 2.750 | 1.295 | 1.293 | 4.56    | 5.39  | 2   | 2   | 334  | 38.9  | 8.37 |
| B1AZR7 | Protein Pcdh11x OS=Mus musculus GN=Pcdh11x PE=2 SV=1 - [B1AZR7_MOUSE]                                                   | 2.80  | 3 | 3   | 4   | 5   | 1.571 | 1.524 | 1.250 | 1.293 | 9.64    | 2.80  | 5   | 5   | 1320 | 145.3 | 5.30 |
| P40338 | Von Hippel-Lindau disease tumor suppressor OS=Mus musculus GN=Vhl PE=2 SV=1 - [VHL_MOUSE]                               | 7.18  | 1 | 1   | 1   | 6   | 1.169 | 1.323 | 1.259 | 1.293 | 18.85   | 7.18  | 2   | 6   | 181  | 20.8  | 6.11 |
| Q62441 | Transducin-like enhancer protein 4 OS=Mus musculus GN=Tle4 PE=1 SV=4 - [TLE4_MOUSE]                                     | 6.34  | 7 | 2   | 4   | 9   | 1.878 | 1.072 | 1.207 | 1.293 | 28.73   | 6.34  | 5   | 9   | 773  | 83.7  | 7.50 |
| Q68FG3 | Protein SPT2 homolog OS=Mus musculus GN=Spty2d1 PE=2 SV=1 - [SPT2_MOUSE]                                                | 10.26 | 1 | 6   | 6   | 12  | 0.599 | 1.027 | 1.644 | 1.294 | 26.37   | 10.26 | 7   | 12  | 682  | 74.8  | 9.76 |
| P53808 | Phosphatidylcholine transfer protein OS=Mus musculus GN=Pcpt PE=1 SV=2 - [PPCT_MOUSE]                                   | 6.07  | 2 | 1   | 1   | 2   | 1.154 | 0.954 | 1.844 | 1.294 | 7.22    | 6.07  | 1   | 2   | 214  | 24.8  | 7.03 |
| Q148W0 | Probable phospholipid-transporting ATPase IC OS=Mus musculus GN=Atp8b1 PE=2 SV=2 - [AT8B1_MOUSE]                        | 2.96  | 1 | 1   | 3   | 10  | 2.169 | 0.953 | 1.224 | 1.294 | 22.94   | 2.96  | 4   | 10  | 1251 | 143.7 | 7.36 |
| Q9J359 | ATP-binding cassette sub-family B member 9 OS=Mus musculus GN=Abcb9 PE=2 SV=1 - [ABCB9_MOUSE]                           | 22.83 | 3 | 11  | 13  | 49  | 1.172 | 0.622 | 1.134 | 1.294 | 138.99  | 22.83 | 23  | 49  | 762  | 83.9  | 7.62 |
| P08905 | Lysozyme C-2 OS=Mus musculus GN=Lyz2 PE=1 SV=2 - [LYZ2_MOUSE]                                                           | 14.86 | 2 | 2   | 2   | 3   | 2.809 | 2.376 | 0.906 | 1.294 | 11.86   | 14.86 | 3   | 3   | 148  | 16.7  | 8.81 |
| Q8CI03 | FLYWCH-type zinc finger-containing protein 1 OS=Mus musculus GN=Flywch1 PE=2 SV=2 - [FWCH1_MOUSE]                       | 11.59 | 3 | 6   | 6   | 14  | 0.638 | 0.784 | 0.923 | 1.295 | 38.54   | 11.59 | 10  | 14  | 673  | 77.0  | 9.91 |
| G3X926 | MCG1407, isoform CRA_a OS=Mus musculus GN=Rpf2 PE=4 SV=1 - [G3X926_MOUSE]                                               | 13.19 | 2 | 3   | 3   | 7   | 1.409 | 1.157 | 0.934 | 1.295 | 20.43   | 13.19 | 6   | 7   | 273  | 31.5  | 9.98 |
| Q00612 | Glucose-6-phosphate 1-dehydrogenase X OS=Mus musculus GN=G6pdx PE=1 SV=3 - [G6PD1_MOUSE]                                | 59.42 | 4 | 27  | 27  | 143 | 0.749 | 0.693 | 1.047 | 1.295 | 441.60  | 59.42 | 48  | 143 | 515  | 59.2  | 6.49 |
| F6R4N2 | Type I inositol 3,4-bisphosphate 4-phosphatase OS=Mus musculus GN=Inpp4a PE=4 SV=1 - [F6R4N2_MOUSE]                     | 31.96 | 2 | 3   | 17  | 60  | 0.518 | 1.135 | 1.051 | 1.295 | 185.17  | 31.96 | 31  | 60  | 679  | 76.4  | 7.28 |
| Q9JK92 | Heat shock protein beta-8 OS=Mus musculus GN=Hspb8 PE=1 SV=1 - [HSPB8_MOUSE]                                            | 13.78 | 1 | 3   | 3   | 7   | 3.056 | 0.946 | 0.918 | 1.295 | 19.24   | 13.78 | 5   | 7   | 196  | 21.5  | 5.02 |
| O35608 | Angiotensin-2 OS=Mus musculus GN=Angpt2 PE=2 SV=2 - [ANGP2_MOUSE]                                                       | 2.82  | 1 | 1   | 1   | 1   | 1.182 | 0.981 | 1.405 | 1.295 | 0.00    | 2.82  | 1   | 1   | 496  | 56.5  | 5.57 |
| P40240 | CD9 antigen OS=Mus musculus GN=Cd9 PE=1 SV=2 - [CD9_MOUSE]                                                              | 14.16 | 1 | 2   | 2   | 13  | 0.872 | 0.684 | 1.205 | 1.295 | 38.69   | 14.16 | 3   | 13  | 226  | 25.2  | 7.23 |
| Q9CQQ7 | ATP synthase subunit b, mitochondrial OS=Mus musculus GN=Atp5f1 PE=1 SV=1 - [AT5F1_MOUSE]                               | 44.53 | 1 | 15  | 16  | 153 | 0.826 | 1.117 | 1.153 | 1.295 | 372.91  | 44.53 | 29  | 153 | 256  | 28.9  | 9.06 |
| Q7TRE0 | Olfactory receptor Olfr885 OS=Mus musculus GN=Olfr885 PE=3 SV=1 - [Q7TRE0_MOUSE]                                        | 6.80  | 1 | 1   | 1   | 1   | 0.557 | 0.732 | 0.954 | 1.296 | 3.19    | 6.80  | 1   | 1   | 309  | 34.4  | 8.02 |
| Q68FG2 | Protein Sptbn2 OS=Mus musculus GN=Sptbn2 PE=2 SV=1 - [Q68FG2_MOUSE]                                                     | 62.65 | 1 | 119 | 136 | 925 | 0.740 | 2.006 | 2.243 | 1.296 | 2826.03 | 62.65 | 244 | 925 | 2388 | 270.8 | 5.86 |
| Q91WL8 | WW domain-containing oxidoreductase OS=Mus musculus GN=Wwox PE=1 SV=1 - [WWOX_MOUSE]                                    | 28.50 | 4 | 10  | 10  | 39  | 0.689 | 0.792 | 1.055 | 1.296 | 94.59   | 28.50 | 18  | 39  | 414  | 46.5  | 7.02 |

|          |                                                                                                                    |       |   |    |    |      |       |       |       |       |         |       |    |      |      |       |      |
|----------|--------------------------------------------------------------------------------------------------------------------|-------|---|----|----|------|-------|-------|-------|-------|---------|-------|----|------|------|-------|------|
| G3X8V5   | RIKEN cDNA 2610206813, isoform CRA_b OS=Mus musculus GN=RnfZ19 PE=4 SV=1 - [G3X8V5_MOUSE]                          | 8.31  | 4 | 5  | 5  | 12   | 1.624 | 0.879 | 1.562 | 1.297 | 31.19   | 8.31  | 7  | 12   | 722  | 79.9  | 6.33 |
| D3Z3Z3   | Voltage-dependent L-type calcium channel subunit beta-3 OS=Mus musculus GN=Cacnb3 PE=2 SV=1 - [D3Z3Z3_MOUSE]       | 39.96 | 4 | 12 | 16 | 63   | 0.746 | 2.325 | 1.659 | 1.297 | 199.84  | 39.96 | 28 | 63   | 483  | 54.4  | 6.54 |
| Q8VC26   | Small G protein signaling modulator 3 OS=Mus musculus GN=Sgsm3 PE=1 SV=1 -                                         | 6.40  | 3 | 4  | 4  | 9    | 0.619 | 0.755 | 0.753 | 1.297 | 25.90   | 6.40  | 7  | 9    | 750  | 85.4  | 5.87 |
| P28334   | 5-hydroxytryptamine receptor 1B OS=Mus musculus GN=Htr1b PE=2 SV=1 - [5HT1B_MOUSE]                                 | 5.18  | 1 | 1  | 1  | 7    | 0.408 | 0.325 | 0.879 | 1.298 | 32.32   | 5.18  | 2  | 7    | 386  | 43.1  | 8.69 |
| B2RQR5   | Small G protein signaling modulator 1 OS=Mus musculus GN=Sgsm1 PE=2 SV=1 -                                         | 25.80 | 5 | 20 | 23 | 113  | 0.774 | 1.247 | 0.935 | 1.298 | 345.97  | 25.80 | 41 | 113  | 1093 | 123.2 | 5.66 |
| Q61147   | Ceruloplasmin OS=Mus musculus GN=Cp PE=1 SV=2 - [CERU_MOUSE]                                                       | 32.99 | 5 | 1  | 26 | 94   | 1.202 | 2.390 | 0.862 | 1.298 | 275.32  | 32.99 | 46 | 94   | 1061 | 121.1 | 5.85 |
| Q80X98   | DEAH (Asp-Glu-Ala-His) box polypeptide 38 OS=Mus musculus GN=Dhx38 PE=2 SV=1 - [Q80X98_MOUSE]                      | 2.85  | 1 | 2  | 3  | 5    | 1.468 | 1.224 | 1.267 | 1.298 | 16.47   | 2.85  | 5  | 5    | 1228 | 140.5 | 6.49 |
| Q9ESN5-2 | Isoform 2 of Centromere protein K OS=Mus musculus GN=Cenpk - [CENPK_MOUSE]                                         | 11.46 | 3 | 1  | 2  | 3    | 1.009 | 1.029 | 1.290 | 1.298 | 0.00    | 11.46 | 2  | 3    | 253  | 29.0  | 4.63 |
| P48774   | Glutathione S-transferase Mu 5 OS=Mus musculus GN=Gstm5 PE=1 SV=1 - [GSTM5_MOUSE]                                  | 60.27 | 6 | 13 | 15 | 113  | 0.752 | 1.170 | 1.240 | 1.298 | 309.22  | 60.27 | 28 | 113  | 224  | 26.6  | 7.21 |
| Q8R574   | Phosphoribosyl pyrophosphate synthase-associated protein 2 OS=Mus musculus GN=Prpsap2 PE=1 SV=1 -                  | 60.43 | 1 | 13 | 16 | 73   | 0.731 | 1.408 | 1.046 | 1.299 | 238.51  | 60.43 | 29 | 73   | 369  | 40.9  | 7.17 |
| Q8BY79   | Solute carrier family 35 member G1 OS=Mus musculus GN=Slc35g1 PE=2 SV=1 -                                          | 4.89  | 1 | 1  | 1  | 1    | 3.088 | 2.115 | 2.087 | 1.299 | 2.38    | 4.89  | 1  | 1    | 368  | 40.2  | 7.84 |
| Q91V88   | Alpha globin 1 OS=Mus musculus GN=Hba-a1 PE=2 SV=1 - [Q91V88_MOUSE]                                                | 69.72 | 2 | 9  | 10 | 1680 | 3.520 | 2.768 | 0.540 | 1.299 | 5450.00 | 69.72 | 18 | 1680 | 142  | 15.1  | 8.22 |
| Q9R0N9   | Synaptotagmin-9 OS=Mus musculus GN=Sy9 PE=1 SV=2 - [SYT9_MOUSE]                                                    | 11.00 | 2 | 3  | 7  | 22   | 0.861 | 0.807 | 1.264 | 1.299 | 51.19   | 11.00 | 12 | 22   | 491  | 56.2  | 7.24 |
| E9Q2M1   | Protein Gm5799 OS=Mus musculus GN=Gm5799 PE=4 SV=1 - [E9Q2M1_MOUSE]                                                | 2.99  | 1 | 1  | 1  | 1    | 1.018 | 0.745 | 1.295 | 1.300 | 0.00    | 2.99  | 1  | 1    | 201  | 24.2  | 8.76 |
| P70182   | Phosphatidylinositol 4-phosphate 5-kinase type-1 alpha OS=Mus musculus GN=Pip5k1a PE=1 SV=2 - [PIS1A_MOUSE]        | 21.25 | 5 | 6  | 9  | 36   | 0.895 | 1.622 | 1.316 | 1.300 | 98.10   | 21.25 | 16 | 36   | 546  | 60.4  | 8.59 |
| Q7TNU7   | LETM1 domain-containing protein LETM2, mitochondrial OS=Mus musculus GN=Letm2 PE=2 SV=1 - [LETM2_MOUSE]            | 2.92  | 1 | 2  | 2  | 3    | 1.914 | 1.261 | 1.637 | 1.300 | 4.28    | 2.92  | 3  | 3    | 480  | 54.4  | 9.63 |
| Q91WS0   | CDGSH iron-sulfur domain-containing protein 1 OS=Mus musculus GN=Cisd1 PE=1 SV=1 - [CISD1_MOUSE]                   | 44.44 | 1 | 5  | 5  | 123  | 0.653 | 1.151 | 1.172 | 1.300 | 383.04  | 44.44 | 10 | 123  | 108  | 12.1  | 9.06 |
| G3UX26   | Voltage-dependent anion-selective channel protein 2 (Fragment) OS=Mus musculus GN=Vdac2 PE=4 SV=1 - [G3UX26_MOUSE] | 70.32 | 4 | 15 | 16 | 197  | 0.766 | 1.128 | 1.106 | 1.301 | 592.08  | 70.32 | 27 | 197  | 283  | 30.4  | 7.58 |
| AZALL9   | Protein Atp2b3 OS=Mus musculus GN=Atp2b3 PE=2 SV=1 - [AZALL9_MOUSE]                                                | 40.07 | 2 | 2  | 47 | 331  | 0.985 | 0.999 | 1.096 | 1.301 | 903.26  | 40.07 | 79 | 331  | 1173 | 128.7 | 6.04 |
| AZASZ6-2 | Isoform 2 of E3 ubiquitin-protein ligase SMURF2 OS=Mus musculus GN=Smurf2 -                                        | 7.21  | 5 | 4  | 5  | 15   | 1.144 | 1.203 | 1.047 | 1.301 | 31.96   | 7.21  | 9  | 15   | 735  | 84.5  | 7.68 |
| Q9Z223-1 | Isoform 2 of Molybdopterin synthase catalytic subunit OS=Mus musculus GN=Mocs2 - [MOC2B_MOUSE]                     | 18.24 | 5 | 3  | 3  | 4    | 1.327 | 1.336 | 1.914 | 1.301 | 9.85    | 18.24 | 4  | 4    | 170  | 18.6  | 6.79 |
| Q60687   | Follitropin subunit beta OS=Mus musculus GN=Fshb PE=2 SV=1 - [FSHB_MOUSE]                                          | 6.92  | 1 | 1  | 1  | 1    | 0.575 | 0.572 | 1.038 | 1.301 | 1.65    | 6.92  | 1  | 1    | 130  | 14.9  | 6.67 |
| J3QPE8   | MCG16555 OS=Mus musculus GN=Vdac3-ps1 PE=4 SV=1 - [J3QPE8_MOUSE]                                                   | 65.37 | 3 | 14 | 16 | 296  | 0.877 | 1.107 | 1.105 | 1.301 | 736.87  | 65.37 | 30 | 296  | 283  | 30.7  | 8.66 |
| A2AHL1   | Anoctamin-3 OS=Mus musculus GN=Ano3 PE=2 SV=1 - [ANO3_MOUSE]                                                       | 3.77  | 2 | 2  | 2  | 7    | 0.879 | 1.065 | 2.099 | 1.301 | 29.59   | 3.77  | 4  | 7    | 981  | 114.5 | 8.87 |

|        |                                                                                                                                                            |       |    |    |    |     |       |       |       |       |        |       |    |     |      |       |      |
|--------|------------------------------------------------------------------------------------------------------------------------------------------------------------|-------|----|----|----|-----|-------|-------|-------|-------|--------|-------|----|-----|------|-------|------|
| Q9DC69 | NADH dehydrogenase [ubiquinone] 1 alpha subcomplex subunit 9, mitochondrial OS=Mus musculus GN=Ndufa9 PE=1 SV=2 - [NDUA9_MOUSE]                            | 54.11 | 2  | 19 | 19 | 204 | 0.681 | 0.834 | 1.103 | 1.301 | 577.86 | 54.11 | 37 | 204 | 377  | 42.5  | 9.74 |
| P14106 | Complement C1q subcomponent subunit B OS=Mus musculus GN=C1qb PE=1 SV=2 - [C1QB_MOUSE]                                                                     | 7.51  | 1  | 1  | 2  | 20  | 1.369 | 2.148 | 1.391 | 1.301 | 52.86  | 7.51  | 4  | 20  | 253  | 26.7  | 8.15 |
| Q3UV95 | Erythrocyte membrane protein band 4.2 OS=Mus musculus GN=Epb4.2 PE=2 SV=1 - [Q3UV95_MOUSE]                                                                 | 18.57 | 2  | 11 | 11 | 30  | 1.405 | 1.767 | 0.578 | 1.301 | 74.61  | 18.57 | 20 | 30  | 673  | 74.8  | 7.84 |
| Q91X52 | L-xylulose reductase OS=Mus musculus GN=Dcxr PE=2 SV=2 - [DCXR_MOUSE]                                                                                      | 31.97 | 2  | 5  | 6  | 21  | 1.041 | 1.269 | 1.260 | 1.302 | 66.67  | 31.97 | 11 | 21  | 244  | 25.7  | 7.31 |
| A2APX7 | Protein Scn1a OS=Mus musculus GN=Scn1a PE=2 SV=1 - [A2APX7_MOUSE]                                                                                          | 12.57 | 13 | 12 | 24 | 106 | 0.661 | 0.543 | 1.176 | 1.302 | 304.62 | 12.57 | 38 | 106 | 1981 | 225.9 | 5.99 |
| Q8K0F1 | TBC1 domain family member 23 OS=Mus musculus GN=Tbc1d23 PE=2 SV=1 - [TBC1D23_MOUSE]                                                                        | 17.25 | 2  | 10 | 10 | 24  | 0.983 | 1.493 | 1.140 | 1.302 | 71.56  | 17.25 | 14 | 24  | 684  | 76.4  | 5.36 |
| Q912A3 | Propionyl-CoA carboxylase alpha chain, mitochondrial OS=Mus musculus GN=Pcca PE=2 SV=2 - [PCCA_MOUSE]                                                      | 51.80 | 6  | 30 | 33 | 150 | 0.949 | 1.380 | 1.203 | 1.302 | 463.77 | 51.80 | 58 | 150 | 724  | 79.9  | 7.25 |
| Q9CZD0 | Methylmalonic aciduria and homocystinuria type C protein homolog OS=Mus musculus GN=Mmachc PE=2 SV=2 - [MMAC_MOUSE]                                        | 3.58  | 1  | 1  | 1  | 1   | 1.402 | 1.266 | 1.305 | 1.303 | 0.00   | 3.58  | 1  | 1   | 279  | 31.6  | 7.55 |
| E9PXB9 | Mitochondrial import inner membrane translocase subunit Tim22 OS=Mus musculus GN=Timm22 PE=2 SV=1 - [E9PXB9_MOUSE]                                         | 16.67 | 2  | 1  | 1  | 6   | 0.644 | 1.017 | 1.015 | 1.303 | 19.73  | 16.67 | 2  | 6   | 90   | 9.2   | 5.36 |
| P60191 | Regulating synaptic membrane exocytosis protein 4 OS=Mus musculus GN=Rims4 PE=2 SV=1 - [RIMS4_MOUSE]                                                       | 18.96 | 1  | 4  | 4  | 11  | 1.272 | 0.851 | 1.272 | 1.303 | 29.63  | 18.96 | 7  | 11  | 269  | 29.3  | 5.80 |
| A2AEV7 | Coiled-coil domain containing 120 OS=Mus musculus GN=Ccdc120 PE=2 SV=1 - [CCDC120_MOUSE]                                                                   | 5.41  | 2  | 2  | 2  | 4   | 0.885 | 0.756 | 0.936 | 1.303 | 10.83  | 5.41  | 3  | 4   | 629  | 67.4  | 9.55 |
| P33267 | Cytochrome P450 2F2 OS=Mus musculus GN=Cyp2f2 PE=2 SV=1 - [CP2F2_MOUSE]                                                                                    | 5.30  | 1  | 3  | 3  | 4   | 0.292 | 1.460 | 0.999 | 1.303 | 9.55   | 5.30  | 4  | 4   | 491  | 55.9  | 7.90 |
| P11627 | Neural cell adhesion molecule L1 OS=Mus musculus GN=L1cam PE=1 SV=1 - [NCAM_MOUSE]                                                                         | 28.97 | 3  | 1  | 32 | 239 | 0.965 | 1.380 | 0.944 | 1.303 | 682.78 | 28.97 | 56 | 239 | 1260 | 140.9 | 5.97 |
| F6W018 | Carbonic anhydrase 12 (Fragment) OS=Mus musculus GN=Car12 PE=2 SV=1 - [F6W018_MOUSE]                                                                       | 10.29 | 1  | 1  | 1  | 2   | 0.517 | 1.806 | 1.257 | 1.303 | 0.00   | 10.29 | 1  | 2   | 204  | 22.8  | 6.68 |
| Q8BMF4 | Dihydropyridyllysine-residue acetyltransferase component of pyruvate dehydrogenase complex, mitochondrial OS=Mus musculus GN=Dlat PE=1 SV=2 - [ODP2_MOUSE] | 49.53 | 1  | 24 | 24 | 325 | 0.906 | 1.164 | 1.270 | 1.303 | 897.49 | 49.53 | 43 | 325 | 642  | 67.9  | 8.57 |
| Q9D771 | Transmembrane protein 206 OS=Mus musculus GN=Tmem206 PE=2 SV=1 - [TM206_MOUSE]                                                                             | 16.57 | 1  | 3  | 3  | 10  | 1.113 | 0.742 | 1.524 | 1.303 | 20.02  | 16.57 | 4  | 10  | 350  | 40.2  | 7.77 |
| Q8BHE8 | Uncharacterized protein C2orf47 homolog, mitochondrial OS=Mus musculus PE=2 SV=1 - [CB047_MOUSE]                                                           | 14.09 | 1  | 3  | 4  | 16  | 0.904 | 1.422 | 1.269 | 1.304 | 40.66  | 14.09 | 8  | 16  | 291  | 33.0  | 9.14 |
| D3Z5M7 | Peroxidase homolog OS=Mus musculus GN=Pxdn PE=2 SV=1 - [D3Z5M7_MOUSE]                                                                                      | 4.23  | 1  | 1  | 1  | 1   | 1.014 | 1.134 | 1.366 | 1.304 | 3.22   | 4.23  | 1  | 1   | 331  | 37.6  | 7.75 |
| Q60866 | Phosphotriesterase-related protein OS=Mus musculus GN=Pter PE=2 SV=1 - [PTER_MOUSE]                                                                        | 17.77 | 4  | 5  | 5  | 8   | 2.390 | 0.910 | 0.917 | 1.304 | 19.47  | 17.77 | 8  | 8   | 349  | 39.2  | 6.67 |
| Q60952 | Centrosome-associated protein CEP250 OS=Mus musculus GN=Cep250 PE=1 SV=4 - [CP250_MOUSE]                                                                   | 5.26  | 6  | 6  | 10 | 12  | 1.325 | 1.379 | 1.306 | 1.304 | 29.35  | 5.26  | 10 | 12  | 2414 | 276.6 | 5.07 |
| Q9DB30 | Phosphorylase b kinase gamma catalytic chain, liver/testis isoform OS=Mus musculus GN=Ptkg2 PE=2 SV=2 - [Ptkg2_MOUSE]                                      | 11.58 | 3  | 4  | 4  | 10  | 1.321 | 1.129 | 0.884 | 1.305 | 37.71  | 11.58 | 6  | 10  | 406  | 46.5  | 6.48 |
| Q7TT36 | Probable G-protein coupled receptor 125 OS=Mus musculus GN=Gpr125 PE=2 SV=3 - [GP125_MOUSE]                                                                | 3.89  | 1  | 2  | 3  | 3   | 1.427 | 0.993 | 1.686 | 1.305 | 4.07   | 3.89  | 3  | 3   | 1310 | 144.6 | 8.40 |

|          |                                                                                                                                   |       |   |    |    |     |       |       |       |       |        |       |    |     |      |       |       |
|----------|-----------------------------------------------------------------------------------------------------------------------------------|-------|---|----|----|-----|-------|-------|-------|-------|--------|-------|----|-----|------|-------|-------|
| P52623   | Uridine-cytidine kinase 1<br>OS=Mus musculus<br>GN=Uck1 PE=2 SV=2 -<br>[LUCK1_MOUSE]                                              | 37.18 | 3 | 8  | 10 | 36  | 1.278 | 1.288 | 0.952 | 1.305 | 87.00  | 37.18 | 17 | 36  | 277  | 31.0  | 7.88  |
| P06684   | Complement C5 OS=Mus musculus<br>GN=C5 PE=1 SV=2 - [C05_MOUSE]                                                                    | 1.37  | 1 | 3  | 3  | 4   | 1.639 | 2.474 | 0.821 | 1.306 | 6.37   | 1.37  | 4  | 4   | 1680 | 188.8 | 6.81  |
| Q8BIF0-2 | Isoform 2 of CD99 antigen-like protein 2 OS=Mus musculus<br>GN=Cd99l2 - [C99L2_MOUSE]                                             | 35.51 | 4 | 5  | 5  | 29  | 1.196 | 0.964 | 1.577 | 1.306 | 106.56 | 35.51 | 7  | 29  | 214  | 22.8  | 4.65  |
| E9Q7Q0   | Mucin-4 OS=Mus musculus<br>GN=Muc4 PE=2 SV=1 - [E9Q7Q0_MOUSE]                                                                     | 1.70  | 2 | 2  | 2  | 5   | 1.049 | 1.491 | 1.406 | 1.306 | 2.14   | 1.70  | 2  | 5   | 3470 | 368.2 | 7.33  |
| Q99MR8   | Methylcrotonoyl-CoA carboxylase subunit alpha, mitochondrial OS=Mus musculus<br>GN=Mccc1 PE=2 SV=2 - [MCCA_MOUSE]                 | 51.46 | 3 | 26 | 28 | 116 | 1.031 | 1.162 | 1.045 | 1.306 | 358.24 | 51.46 | 47 | 116 | 717  | 79.3  | 7.83  |
| E9QKH0   | CLIP-associating protein 1 OS=Mus musculus<br>GN=Clasp1 PE=2 SV=1 - [E9QKH0_MOUSE]                                                | 42.12 | 3 | 2  | 54 | 223 | 0.982 | 1.110 | 1.085 | 1.307 | 671.87 | 42.12 | 95 | 223 | 1536 | 169.2 | 9.03  |
| E0CXZ0   | Nucleolar protein 56 OS=Mus musculus<br>GN=Nop56 PE=2 SV=1 - [E0CXZ0_MOUSE]                                                       | 39.08 | 2 | 1  | 9  | 25  | 0.206 | 0.310 | 0.840 | 1.307 | 60.76  | 39.08 | 16 | 25  | 261  | 29.1  | 7.18  |
| E9Q2Y0   | Protein Eid2b OS=Mus musculus<br>GN=Eid2b PE=4 SV=1 - [E9Q2Y0_MOUSE]                                                              | 15.89 | 1 | 1  | 2  | 6   | 1.953 | 1.294 | 1.172 | 1.308 | 10.07  | 15.89 | 4  | 6   | 151  | 16.2  | 5.24  |
| P56389   | Cytidine deaminase OS=Mus musculus<br>GN=Cda PE=1 SV=2 - [CDD_MOUSE]                                                              | 56.85 | 1 | 5  | 6  | 32  | 1.923 | 0.499 | 0.902 | 1.308 | 92.46  | 56.85 | 12 | 32  | 146  | 16.1  | 5.58  |
| Q01279   | Epidermal growth factor receptor OS=Mus musculus<br>GN=Egfr PE=1 SV=1 - [EGFR_MOUSE]                                              | 12.15 | 2 | 12 | 13 | 33  | 1.425 | 1.444 | 0.927 | 1.308 | 93.05  | 12.15 | 20 | 33  | 1210 | 134.8 | 6.86  |
| Q8BML1-2 | Isoform 2 of Protein-methionine sulfoxide oxidase MICAL2 OS=Mus musculus<br>GN=Mical2 - [MICA2_MOUSE]                             | 8.17  | 4 | 3  | 8  | 14  | 3.312 | 2.763 | 0.448 | 1.308 | 24.99  | 8.17  | 9  | 14  | 1102 | 124.2 | 8.54  |
| D3Z0D9   | DnaJ (Hsp40) homolog, subfamily C, member 12, isoform CRA_a (Fragment) OS=Mus musculus<br>GN=Dnajc12 PE=4 SV=1 - [D3Z0D9_MOUSE]   | 21.55 | 2 | 1  | 1  | 10  | 2.063 | 1.112 | 1.147 | 1.308 | 32.32  | 21.55 | 2  | 10  | 116  | 13.3  | 6.57  |
| Q8CE90-5 | Isoform 5 of Dual specificity mitogen-activated protein kinase kinase 7 OS=Mus musculus<br>GN=Map2k7 - [MAP2K7_MOUSE]             | 41.43 | 8 | 12 | 14 | 48  | 0.670 | 0.695 | 1.050 | 1.308 | 127.87 | 41.43 | 25 | 48  | 391  | 44.2  | 8.73  |
| Q9DAS9   | Guanine nucleotide-binding protein G(T)/G(S)/G(O) subunit gamma-12 OS=Mus musculus<br>GN=Gng12 PE=1 SV=2 - [GNG12_MOUSE]          | 69.44 | 1 | 5  | 5  | 94  | 1.357 | 0.788 | 1.215 | 1.309 | 289.70 | 69.44 | 10 | 94  | 72   | 8.0   | 8.97  |
| Q9D6J5   | NADH dehydrogenase [ubiquinone] 1 beta subcomplex subunit 8, mitochondrial OS=Mus musculus<br>GN=Ndufb8 PE=1 SV=1 - [NDUB8_MOUSE] | 29.57 | 4 | 4  | 4  | 130 | 0.991 | 1.109 | 1.194 | 1.309 | 424.44 | 29.57 | 7  | 130 | 186  | 21.9  | 6.64  |
| F8SLP9   | PEX5-related protein OS=Mus musculus<br>GN=Pex5l PE=2 SV=1 - [F8SLP9_MOUSE]                                                       | 56.61 | 5 | 11 | 22 | 95  | 0.911 | 0.811 | 1.133 | 1.309 | 240.05 | 56.61 | 37 | 95  | 567  | 63.1  | 5.33  |
| Q8BJS4-3 | Isoform 3 of SUN domain-containing protein 2 OS=Mus musculus<br>GN=Sun2 - [SUN2_MOUSE]                                            | 13.16 | 5 | 7  | 7  | 19  | 1.064 | 1.517 | 1.101 | 1.309 | 56.55  | 13.16 | 12 | 19  | 699  | 78.1  | 6.90  |
| H9KUZ7   | Splicing regulator RBM11 OS=Mus musculus<br>GN=Rbm11 PE=2 SV=1 - [H9KUZ7_MOUSE]                                                   | 4.62  | 2 | 1  | 1  | 1   | 3.122 | 1.286 | 1.232 | 1.309 | 2.03   | 4.62  | 1  | 1   | 238  | 27.0  | 8.81  |
| F6UCX4   | Protein Sptbn5 (Fragment) OS=Mus musculus<br>GN=Sptbn5 PE=4 SV=1 - [F6UCX4_MOUSE]                                                 | 1.24  | 1 | 1  | 2  | 10  | 0.835 | 0.846 | 1.229 | 1.310 | 21.92  | 1.24  | 3  | 10  | 1209 | 138.7 | 5.92  |
| Q8R0Y8   | Mitochondrial coenzyme A transporter SLC25A42 OS=Mus musculus<br>GN=Slc25a42 PE=2 SV=1 - [S2542_MOUSE]                            | 20.13 | 1 | 6  | 6  | 8   | 1.273 | 1.295 | 1.187 | 1.310 | 25.99  | 20.13 | 8  | 8   | 318  | 35.2  | 10.05 |
| E9Q448   | Tropomyosin alpha-1 chain OS=Mus musculus<br>GN=Tpm1 PE=2 SV=1 - [E9Q448_MOUSE]                                                   | 41.20 | 2 | 1  | 15 | 264 | 1.123 | 4.430 | 0.956 | 1.310 | 677.90 | 41.20 | 29 | 264 | 284  | 32.8  | 4.75  |
| Q8C178   | Acyl-coenzyme A oxidase OS=Mus musculus<br>GN=Acox3 PE=2 SV=1 - [Q8C178_MOUSE]                                                    | 16.93 | 3 | 1  | 10 | 24  | 0.740 | 0.663 | 0.953 | 1.310 | 52.23  | 16.93 | 16 | 24  | 697  | 77.8  | 7.11  |
| Q8VGU2   | Olfactory receptor 283 OS=Mus musculus<br>GN=Olfr283 PE=2 SV=1 - [Q8VGU2_MOUSE]                                                   | 4.53  | 1 | 1  | 1  | 1   | 3.221 | 2.264 | 1.343 | 1.310 | 0.00   | 4.53  | 1  | 1   | 309  | 34.3  | 8.18  |
| Q8BH04   | Phosphoenolpyruvate carboxykinase (GTP), mitochondrial OS=Mus musculus<br>GN=Pck2 PE=2 SV=1 - [PCKGM_MOUSE]                       | 38.13 | 1 | 20 | 20 | 81  | 0.758 | 1.231 | 0.917 | 1.311 | 219.92 | 38.13 | 33 | 81  | 640  | 70.5  | 7.28  |

|          |                                                                                                                                   |       |   |    |    |     |       |       |       |       |         |       |    |     |      |       |      |
|----------|-----------------------------------------------------------------------------------------------------------------------------------|-------|---|----|----|-----|-------|-------|-------|-------|---------|-------|----|-----|------|-------|------|
| P03930   | ATP synthase protein 8<br>OS=Mus musculus<br>GN=Mtbp8 PE=1 SV=1 -<br>[ATP8_MOUSE]                                                 | 43.28 | 1 | 3  | 3  | 19  | 0.757 | 1.010 | 1.234 | 1.311 | 48.69   | 43.28 | 5  | 19  | 67   | 7.8   | 9.88 |
| P59114   | Phosphorylated CTD-<br>interacting factor 1<br>OS=Mus musculus<br>GN=Pcif1 PE=1 SV=1 -<br>[PCIF1_MOUSE]                           | 10.91 | 1 | 5  | 5  | 13  | 0.609 | 0.943 | 1.115 | 1.311 | 41.94   | 10.91 | 8  | 13  | 706  | 80.5  | 7.64 |
| P11679   | Keratin, type II<br>cytoskeletal 8 OS=Mus<br>musculus GN=Krt8 PE=1<br>SV=4 - [K2C8_MOUSE]                                         | 37.14 | 3 | 12 | 15 | 64  | 0.843 | 1.083 | 0.965 | 1.311 | 151.48  | 37.14 | 25 | 64  | 490  | 54.5  | 5.82 |
| Q8VIF5   | Low affinity neurotensin<br>receptor OS=Mus<br>musculus GN=Ntsr2 PE=2<br>SV=1 - [Q8VIF5_MOUSE]                                    | 6.25  | 2 | 2  | 2  | 9   | 0.482 | 0.558 | 0.735 | 1.312 | 34.04   | 6.25  | 3  | 9   | 416  | 46.3  | 9.19 |
| E9Q1K0   | Sorting nexin-25 OS=Mus<br>musculus GN=Snx25 PE=2<br>SV=1 - [E9Q1K0_MOUSE]                                                        | 9.33  | 2 | 8  | 9  | 17  | 0.889 | 0.898 | 1.150 | 1.312 | 47.30   | 9.33  | 15 | 17  | 986  | 112.1 | 7.01 |
| Q571H0   | Nucleolar pre-ribosomal-<br>associated protein 1<br>OS=Mus musculus<br>GN=Urb1 PE=2 SV=2 -<br>[NPA1P_MOUSE]                       | 2.24  | 5 | 4  | 5  | 7   | 1.713 | 0.520 | 1.169 | 1.312 | 16.67   | 2.24  | 5  | 7   | 2274 | 254.5 | 6.96 |
| Q9ERL9   | Guanylate cyclase soluble<br>subunit alpha-3 OS=Mus<br>musculus GN=Gucy1a3<br>PE=2 SV=2<br>[GCYA3_MOUSE]                          | 31.84 | 1 | 19 | 19 | 50  | 0.589 | 1.396 | 1.425 | 1.312 | 146.58  | 31.84 | 30 | 50  | 691  | 77.5  | 7.17 |
| A2AP32   | NADH dehydrogenase<br>[ubiquinone] 1 beta<br>subcomplex subunit 6<br>OS=Mus musculus<br>GN=Ndufb6 PE=2 SV=1 -<br>[A2AP32_MOUSE]   | 39.18 | 2 | 4  | 4  | 74  | 1.147 | 0.950 | 1.191 | 1.313 | 172.57  | 39.18 | 6  | 74  | 97   | 11.7  | 9.60 |
| Q64516   | Glycerol kinase OS=Mus<br>musculus GN=Gk PE=2<br>SV=2 - [GLPK_MOUSE]                                                              | 34.53 | 5 | 14 | 18 | 80  | 0.999 | 1.178 | 1.192 | 1.313 | 249.69  | 34.53 | 31 | 80  | 559  | 61.2  | 5.87 |
| F6TUA2   | CAS1 domain-containing<br>protein 1 (Fragment)<br>OS=Mus musculus<br>GN=Cas1 PE=4 SV=1 -<br>[F6TUA2_MOUSE]                        | 4.95  | 3 | 1  | 1  | 1   | 1.481 | 1.229 | 1.212 | 1.313 | 2.10    | 4.95  | 1  | 1   | 182  | 20.7  | 8.98 |
| Q8VD33   | Small glutamine-rich<br>tetrapeptide repeat-<br>containing protein beta<br>OS=Mus musculus<br>GN=Sgtb PE=2 SV=1 -<br>[SGTB_MOUSE] | 26.97 | 2 | 1  | 6  | 30  | 1.652 | 1.523 | 1.884 | 1.313 | 73.05   | 26.97 | 11 | 30  | 304  | 33.4  | 4.92 |
| Q8K2C6   | NAD-dependent protein<br>deacylase sirtuin-5,<br>mitochondrial OS=Mus<br>musculus GN=Sirt5 PE=1<br>SV=1 - [SIR5_MOUSE]            | 30.97 | 1 | 9  | 9  | 24  | 1.335 | 0.973 | 1.025 | 1.313 | 81.92   | 30.97 | 18 | 24  | 310  | 34.1  | 8.53 |
| D3Z3F7   | UDP-glucose 6-<br>dehydrogenase OS=Mus<br>musculus GN=Ugdh PE=2<br>SV=1 - [D3Z3F7_MOUSE]                                          | 10.09 | 3 | 3  | 4  | 5   | 0.942 | 0.983 | 0.840 | 1.313 | 13.04   | 10.09 | 5  | 5   | 426  | 47.4  | 6.23 |
| O35955   | Proteasome subunit beta<br>type-10 OS=Mus musculus<br>GN=Psb10 PE=1 SV=1 -<br>[PSB10_MOUSE]                                       | 17.95 | 1 | 4  | 4  | 8   | 1.278 | 1.271 | 0.892 | 1.314 | 25.83   | 17.95 | 6  | 8   | 273  | 29.0  | 6.87 |
| Q8VEM8   | Phosphate carrier protein,<br>mitochondrial OS=Mus<br>musculus GN=Sic25a3<br>PE=1 SV=1<br>[MPCP_MOUSE]                            | 35.57 | 2 | 16 | 16 | 390 | 0.797 | 1.089 | 1.127 | 1.314 | 1024.41 | 35.57 | 28 | 390 | 357  | 39.6  | 9.26 |
| P42230   | Signal transducer and<br>activator of transcription<br>5A OS=Mus musculus<br>GN=Stat5a PE=1 SV=1 -<br>[STASA_MOUSE]               | 20.81 | 3 | 1  | 15 | 30  | 1.071 | 0.880 | 0.707 | 1.314 | 92.93   | 20.81 | 21 | 30  | 793  | 90.8  | 6.39 |
| Q64521   | Glycerol-3-phosphate<br>dehydrogenase,<br>mitochondrial OS=Mus<br>musculus GN=Gpd2 PE=1<br>SV=2 - [GPD2_MOUSE]                    | 68.64 | 2 | 42 | 42 | 264 | 0.864 | 1.525 | 1.138 | 1.314 | 859.55  | 68.64 | 76 | 264 | 727  | 80.9  | 6.61 |
| Q91W61   | F-box/LRR-repeat protein<br>15 OS=Mus musculus<br>GN=Fbxl15 PE=1 SV=2 -<br>[FXL15_MOUSE]                                          | 41.00 | 1 | 9  | 9  | 25  | 0.692 | 0.941 | 0.875 | 1.314 | 72.49   | 41.00 | 17 | 25  | 300  | 33.1  | 7.43 |
| Q922Q1   | MOSC domain-containing<br>protein 2, mitochondrial<br>OS=Mus musculus<br>GN=Marc2 PE=1 SV=1 -<br>[MOSC2_MOUSE]                    | 42.31 | 4 | 12 | 14 | 54  | 0.683 | 1.776 | 1.221 | 1.315 | 140.50  | 42.31 | 24 | 54  | 338  | 38.2  | 8.68 |
| Q8VHE6   | Dynein heavy chain 5,<br>axonemal OS=Mus<br>musculus GN=Dnah5<br>PE=1 SV=2 -                                                      | 1.47  | 1 | 4  | 5  | 7   | 1.431 | 0.967 | 1.133 | 1.315 | 10.11   | 1.47  | 5  | 7   | 4621 | 527.2 | 6.15 |
| E9Q6P5   | Protein Ttc7b OS=Mus<br>musculus GN=Ttc7b PE=2<br>SV=1 - [E9Q6P5_MOUSE]                                                           | 23.25 | 1 | 19 | 19 | 67  | 0.743 | 1.230 | 1.199 | 1.315 | 187.74  | 23.25 | 30 | 67  | 843  | 94.1  | 6.90 |
| P48542-2 | Isoform GIRK2-1 of G<br>protein-activated inward<br>rectifier potassium channel<br>2 OS=Mus musculus<br>GN=Kcnj6 -                | 8.70  | 5 | 2  | 2  | 12  | 1.094 | 0.808 | 1.314 | 1.315 | 26.76   | 8.70  | 4  | 12  | 414  | 47.4  | 5.52 |
| F6T4Z4   | Decaprenyl-diphosphate<br>synthase subunit 2<br>(Fragment) OS=Mus<br>musculus GN=Pds2 PE=4<br>SV=1 - [F6T4Z4_MOUSE]               | 7.97  | 1 | 1  | 1  | 1   | 1.465 | 1.725 | 1.848 | 1.315 | 0.00    | 7.97  | 1  | 1   | 138  | 15.2  | 7.93 |

|          |                                                                                                            |       |   |    |    |      |       |       |       |       |         |       |     |      |      |       |      |
|----------|------------------------------------------------------------------------------------------------------------|-------|---|----|----|------|-------|-------|-------|-------|---------|-------|-----|------|------|-------|------|
| Q61001   | Laminin subunit alpha-5<br>OS=Mus musculus<br>GN=Lama5 PE=1 SV=4 -<br>[LAMAS_MOUSE]                        | 13.13 | 3 | 35 | 36 | 119  | 1.210 | 1.907 | 1.058 | 1.316 | 353.47  | 13.13 | 62  | 119  | 3718 | 403.8 | 6.73 |
| A1BN54   | Alpha actinin 1a OS=Mus musculus<br>GN=Actn1 PE=2 SV=1 - [A1BN54_MOUSE]                                    | 68.55 | 2 | 3  | 58 | 583  | 1.114 | 3.514 | 2.380 | 1.316 | 1544.13 | 68.55 | 107 | 583  | 887  | 102.7 | 5.48 |
| D6RGB6   | Uncharacterized protein<br>OS=Mus musculus<br>GN=Vps9d1 PE=2 SV=1 -<br>[D6RGB6_MOUSE]                      | 27.47 | 1 | 1  | 6  | 8    | 0.369 | 0.705 | 1.119 | 1.316 | 17.56   | 27.47 | 8   | 8    | 233  | 25.6  | 9.29 |
| Q8BZ98-2 | Isoform 2 of Dynamin-3<br>OS=Mus musculus<br>GN=Dnm3 -<br>[DYN3_MOUSE]                                     | 56.23 | 4 | 23 | 53 | 476  | 0.580 | 0.810 | 1.076 | 1.317 | 1210.33 | 56.23 | 93  | 476  | 859  | 96.7  | 8.24 |
| Q9CWX8   | GATS-like protein 3<br>OS=Mus musculus<br>GN=Gatsl3 PE=2 SV=1 -<br>[GATL3_MOUSE]                           | 5.74  | 1 | 1  | 1  | 1    | 1.516 | 1.674 | 1.429 | 1.317 | 0.00    | 5.74  | 1   | 1    | 331  | 36.6  | 4.98 |
| P56213   | FAD-linked sulphydryl oxidase ALR OS=Mus musculus<br>GN=Gfer PE=2 SV=2 - [ALR_MOUSE]                       | 27.78 | 1 | 5  | 5  | 12   | 1.124 | 1.157 | 1.450 | 1.318 | 27.66   | 27.78 | 8   | 12   | 198  | 22.9  | 7.93 |
| P34968   | 5-hydroxytryptamine receptor 2C OS=Mus musculus<br>GN=Htr2c PE=2 SV=2 - [SHT2C_MOUSE]                      | 1.96  | 1 | 1  | 1  | 1    | 1.072 | 1.350 | 1.456 | 1.318 | 2.40    | 1.96  | 1   | 1    | 459  | 51.9  | 9.31 |
| Q3TY86   | Apoptosis-inducing factor 3 OS=Mus musculus<br>GN=Aifm3 PE=2 SV=1 -<br>[AIFM3_MOUSE]                       | 27.44 | 3 | 16 | 16 | 36   | 0.632 | 1.062 | 1.132 | 1.318 | 102.01  | 27.44 | 27  | 36   | 605  | 66.7  | 9.04 |
| P54116   | Erythrocyte band 7 integral membrane protein<br>OS=Mus musculus<br>GN=Stom PE=1 SV=3 -<br>[STOM_MOUSE]     | 23.24 | 2 | 6  | 6  | 21   | 1.243 | 1.858 | 0.693 | 1.318 | 70.92   | 23.24 | 10  | 21   | 284  | 31.4  | 6.93 |
| Q9D799   | Methionyl-tRNA formyltransferase, mitochondrial OS=Mus musculus<br>GN=Mtfmt PE=2 SV=3 - [FMT_MOUSE]        | 6.99  | 1 | 2  | 2  | 3    | 0.805 | 0.865 | 1.229 | 1.319 | 3.25    | 6.99  | 2   | 3    | 386  | 43.1  | 9.42 |
| Q9Z051   | 3'(2'),5'-biphosphate nucleotidase 1 OS=Mus musculus<br>GN=Bpnt1 PE=1 SV=2 - [BPNT1_MOUSE]                 | 56.82 | 3 | 13 | 13 | 72   | 0.724 | 0.973 | 1.213 | 1.319 | 218.19  | 56.82 | 25  | 72   | 308  | 33.2  | 5.82 |
| E9Q8T7   | Protein Dnah1 OS=Mus musculus<br>GN=Dnah1 PE=4 SV=1 -<br>[E9Q8T7_MOUSE]                                    | 1.13  | 1 | 3  | 5  | 6    | 0.667 | 0.913 | 1.012 | 1.319 | 15.53   | 1.13  | 5   | 6    | 4250 | 486.8 | 5.57 |
| Q9D0F9   | Phosphoglucosmutase-1 OS=Mus musculus<br>GN=Pgm1 PE=1 SV=4 -<br>[PGM1_MOUSE]                               | 65.48 | 2 | 34 | 35 | 318  | 0.717 | 0.858 | 0.807 | 1.319 | 903.61  | 65.48 | 66  | 318  | 562  | 61.4  | 6.57 |
| Q8CGR6   | Epidermal growth factor-binding protein type B OS=Mus musculus<br>GN=Kikl3 PE=3 SV=1 -<br>[Q8CGR6_MOUSE]   | 5.80  | 1 | 1  | 1  | 1    | 1.664 | 1.284 | 0.993 | 1.320 | 0.00    | 5.80  | 1   | 1    | 276  | 30.3  | 8.31 |
| F7ANP4   | Protein Gm16506 (Fragment) OS=Mus musculus<br>GN=Gm16506 PE=4 SV=1 -                                       | 9.39  | 1 | 1  | 1  | 1    | 2.438 | 0.738 | 1.125 | 1.320 | 0.00    | 9.39  | 1   | 1    | 213  | 24.7  | 9.09 |
| A2A4U6   | Protein Zfp334 OS=Mus musculus<br>GN=Zfp334 PE=4 SV=1 -<br>[A2A4U6_MOUSE]                                  | 4.42  | 1 | 2  | 2  | 5    | 1.028 | 0.718 | 1.048 | 1.320 | 24.56   | 4.42  | 3   | 5    | 679  | 78.2  | 9.45 |
| Q8CI94   | Glycogen phosphorylase, brain form OS=Mus musculus<br>GN=Pygb PE=1 SV=3 - [PYGB_MOUSE]                     | 62.75 | 1 | 37 | 50 | 483  | 0.665 | 1.262 | 1.053 | 1.320 | 1448.15 | 62.75 | 89  | 483  | 843  | 96.7  | 6.73 |
| Q8C0M0-2 | Isoform 2 of WD repeat-containing protein 59 OS=Mus musculus<br>GN=Wdr59 -                                 | 5.54  | 4 | 4  | 4  | 9    | 1.095 | 1.028 | 0.970 | 1.320 | 15.74   | 5.54  | 6   | 9    | 974  | 109.7 | 7.80 |
| Q08274   | Dystrophia myotonica WD repeat-containing protein OS=Mus musculus<br>GN=Dmwd PE=2 SV=3 -<br>[DMWD_MOUSE]   | 35.64 | 1 | 2  | 17 | 55   | 1.310 | 1.925 | 1.464 | 1.321 | 181.69  | 35.64 | 27  | 55   | 665  | 69.8  | 7.24 |
| F8WHT2   | Protein phosphatase Slingshot homolog 1 OS=Mus musculus<br>GN=Ssh1 PE=2 SV=1 -<br>[F8WHT2_MOUSE]           | 6.71  | 3 | 4  | 4  | 16   | 1.114 | 1.021 | 1.086 | 1.321 | 47.15   | 6.71  | 7   | 16   | 999  | 110.7 | 6.83 |
| Q8R1B0   | SH3 and cysteine-rich domain-containing protein 2 OS=Mus musculus<br>GN=Stac2 PE=2 SV=1 -<br>[STAC2_MOUSE] | 7.84  | 1 | 3  | 3  | 3    | 1.543 | 0.344 | 1.346 | 1.321 | 8.62    | 7.84  | 3   | 3    | 408  | 44.8  | 7.75 |
| E9QQ30   | Eukaryotic translation initiation factor 2-alpha kinase 3 OS=Mus musculus<br>GN=Elf2ak3 PE=2 SV=1 -        | 1.53  | 2 | 2  | 2  | 3    | 0.876 | 1.626 | 0.985 | 1.321 | 6.26    | 1.53  | 3   | 3    | 1114 | 124.6 | 5.25 |
| Q03265   | ATP synthase subunit alpha, mitochondrial OS=Mus musculus<br>GN=Atp5a1 PE=1 SV=1 -<br>[ATPA_MOUSE]         | 69.44 | 4 | 46 | 46 | 1988 | 0.941 | 1.005 | 1.197 | 1.322 | 5853.59 | 69.44 | 79  | 1988 | 553  | 59.7  | 9.19 |
| Q04592   | Protein convertase subtilisin/kexin type 5 OS=Mus musculus<br>GN=Pcsk5 PE=1 SV=3 -<br>[PCSK5_MOUSE]        | 0.59  | 1 | 1  | 1  | 2    | 1.029 | 0.825 | 0.897 | 1.322 | 2.75    | 0.59  | 1   | 2    | 1877 | 209.1 | 6.09 |
| Q9Z2I8-2 | Isoform 2 of Succinyl-CoA ligase (GDP-forming) subunit beta, mitochondrial OS=Mus musculus<br>GN=Sucg2 -   | 46.09 | 2 | 15 | 16 | 60   | 0.983 | 1.289 | 0.957 | 1.322 | 155.23  | 46.09 | 29  | 60   | 384  | 41.3  | 5.44 |



|          |                                                                                                                              |       |    |    |    |     |       |       |       |       |         |       |    |     |     |       |      |
|----------|------------------------------------------------------------------------------------------------------------------------------|-------|----|----|----|-----|-------|-------|-------|-------|---------|-------|----|-----|-----|-------|------|
| P26443   | Glutamate dehydrogenase 1, mitochondrial OS=Mus musculus GN=Glud1 PE=1 SV=1 - [DHE3_MOUSE]                                   | 65.77 | 3  | 36 | 36 | 460 | 0.858 | 0.905 | 0.917 | 1.322 | 1438.33 | 65.77 | 63 | 460 | 558 | 61.3  | 8.00 |
| Q9JK53   | Prolargin OS=Mus musculus GN=Prep PE=2 SV=2 - [PRELP_MOUSE]                                                                  | 19.05 | 1  | 7  | 7  | 23  | 0.760 | 7.465 | 0.925 | 1.322 | 66.41   | 19.05 | 12 | 23  | 378 | 43.3  | 9.54 |
| Q8BS40   | Glycolipid transfer protein domain-containing protein 1 OS=Mus musculus GN=Gltpd1 PE=2 SV=1 - [GLTD1_MOUSE]                  | 18.52 | 1  | 3  | 3  | 11  | 1.083 | 1.223 | 0.984 | 1.323 | 29.13   | 18.52 | 5  | 11  | 216 | 24.6  | 6.74 |
| Q3U269   | Thiosulfate sulfurtransferase/rhodanes e-like domain-containing protein 2 OS=Mus musculus GN=Tstd2 PE=2 SV=3 - [TSTD2_MOUSE] | 2.22  | 1  | 1  | 1  | 1   | 1.775 | 1.204 | 1.254 | 1.323 | 2.28    | 2.22  | 1  | 1   | 495 | 55.4  | 7.28 |
| B8J366   | MCG141136, isoform CRA_a OS=Mus musculus GN=2310061104Rik PE=4 SV=1 - [B8J366_MOUSE]                                         | 16.81 | 5  | 3  | 3  | 14  | 0.890 | 1.034 | 1.085 | 1.323 | 49.42   | 16.81 | 6  | 14  | 232 | 26.7  | 8.35 |
| Q7M750   | Opalin OS=Mus musculus GN=Opalin PE=1 SV=1 - [OPALI_MOUSE]                                                                   | 32.87 | 1  | 3  | 3  | 12  | 1.050 | 0.391 | 1.381 | 1.324 | 36.32   | 32.87 | 4  | 12  | 143 | 15.8  | 4.88 |
| J3QPG9   | Uncharacterized protein OS=Mus musculus GN=Gm21718 PE=4 SV=1 - [J3QPG9_MOUSE]                                                | 10.53 | 1  | 1  | 2  | 5   | 1.280 | 1.113 | 1.309 | 1.324 | 12.26   | 10.53 | 4  | 5   | 171 | 18.8  | 6.77 |
| E0CXR8   | Partitioning defective 3 homolog (Fragment) OS=Mus musculus GN=Par3 PE=2 SV=1 - [E0CXR8_MOUSE]                               | 16.67 | 10 | 1  | 12 | 29  | 0.961 | 0.610 | 0.821 | 1.324 | 88.49   | 16.67 | 19 | 29  | 990 | 108.8 | 6.51 |
| Q9CWJ9   | Bifunctional purine biosynthesis protein PURH OS=Mus musculus GN=Atic PE=1 SV=2 - [PUR9_MOUSE]                               | 63.51 | 1  | 27 | 27 | 111 | 0.820 | 1.193 | 0.946 | 1.324 | 379.68  | 63.51 | 51 | 111 | 592 | 64.2  | 6.76 |
| P08551   | Neurofilament light polypeptide OS=Mus musculus GN=Nefl PE=1 SV=5 - [NFL_MOUSE]                                              | 64.46 | 1  | 31 | 34 | 945 | 2.474 | 0.263 | 1.364 | 1.325 | 2646.58 | 64.46 | 62 | 945 | 543 | 61.5  | 4.64 |
| Q6PCQ0   | IQ domain-containing protein E OS=Mus musculus GN=Iqce PE=2 SV=1 - [IQCE_MOUSE]                                              | 8.23  | 4  | 2  | 3  | 7   | 2.017 | 0.647 | 1.408 | 1.325 | 13.40   | 8.23  | 4  | 7   | 778 | 86.3  | 7.18 |
| Q8R1G2   | Carboxymethyleneulonenolase homolog OS=Mus musculus GN=Cmbl PE=2 SV=1 - [CMBL_MOUSE]                                         | 43.27 | 3  | 7  | 8  | 33  | 1.034 | 2.085 | 0.767 | 1.325 | 95.14   | 43.27 | 13 | 33  | 245 | 27.9  | 7.18 |
| P11352   | Glutathione peroxidase 1 OS=Mus musculus GN=Gpx1 PE=1 SV=2 - [GPX1_MOUSE]                                                    | 41.79 | 1  | 6  | 6  | 29  | 1.633 | 1.261 | 0.855 | 1.325 | 85.75   | 41.79 | 11 | 29  | 201 | 22.3  | 7.21 |
| O35684   | Neuroserpin OS=Mus musculus GN=Serpin1 PE=1 SV=1 - [NEUS_MOUSE]                                                              | 20.00 | 2  | 6  | 6  | 9   | 0.704 | 1.067 | 1.716 | 1.326 | 21.19   | 20.00 | 8  | 9   | 410 | 46.3  | 4.72 |
| O89023   | Tripeptidyl-peptidase 1 OS=Mus musculus GN=Tpp1 PE=1 SV=2 - [TPP1_MOUSE]                                                     | 17.79 | 1  | 5  | 5  | 18  | 0.716 | 2.679 | 1.275 | 1.326 | 57.07   | 17.79 | 9  | 18  | 562 | 61.3  | 6.57 |
| Q9CQC8-2 | Isoform 2 of Maspardin OS=Mus musculus GN=Spq21 - [SPG21_MOUSE]                                                              | 17.53 | 2  | 4  | 4  | 9   | 1.120 | 0.945 | 1.073 | 1.327 | 31.91   | 17.53 | 7  | 9   | 291 | 33.1  | 6.54 |
| G5E8Q5   | DCN1-like protein 2 OS=Mus musculus GN=Dcn1d2 PE=4 SV=1 - [G5E8Q5_MOUSE]                                                     | 34.52 | 5  | 5  | 7  | 20  | 1.243 | 1.373 | 1.210 | 1.327 | 51.75   | 34.52 | 11 | 20  | 197 | 22.8  | 7.97 |
| Q61423   | Potassium voltage-gated channel subfamily A member 4 OS=Mus musculus GN=Kcna4 PE=1 SV=2 - [KCNAA4_MOUSE]                     | 11.62 | 2  | 5  | 7  | 32  | 0.609 | 1.013 | 1.621 | 1.327 | 104.63  | 11.62 | 12 | 32  | 654 | 73.4  | 5.29 |
| Q9QZ08   | N-acetyl-D-glucosamine kinase OS=Mus musculus GN=Nagk PE=2 SV=3 - [NAGK_MOUSE]                                               | 51.31 | 3  | 13 | 13 | 54  | 1.064 | 1.812 | 1.129 | 1.327 | 165.60  | 51.31 | 23 | 54  | 343 | 37.2  | 5.73 |
| O08791-2 | Isoform Short of Transcription factor COE3 OS=Mus musculus GN=Ebf3 -                                                         | 2.36  | 8  | 1  | 1  | 2   | 0.685 | 0.539 | 0.869 | 1.328 | 6.25    | 2.36  | 2  | 2   | 551 | 60.4  | 8.81 |
| P51163   | Uroporphyrinogen-III synthase OS=Mus musculus GN=Uros PE=2 SV=1 - [HEM4_MOUSE]                                               | 26.79 | 2  | 5  | 5  | 19  | 1.222 | 1.280 | 1.152 | 1.328 | 72.20   | 26.79 | 8  | 19  | 265 | 28.5  | 6.54 |
| Q3UNDO-2 | Isoform 2 of Src kinase-associated phosphoprotein 2 OS=Mus musculus GN=Skap2 - [SKAP2_MOUSE]                                 | 8.83  | 2  | 2  | 2  | 3   | 0.698 | 2.011 | 1.123 | 1.328 | 4.64    | 8.83  | 2  | 3   | 351 | 39.9  | 4.74 |
| Q8BS45   | Tetratricopeptide repeat protein 26 OS=Mus musculus GN=Ttc26 PE=2 SV=1 - [TTC26_MOUSE]                                       | 4.51  | 1  | 2  | 2  | 5   | 0.538 | 0.907 | 0.947 | 1.328 | 11.69   | 4.51  | 3  | 5   | 554 | 64.1  | 6.80 |
| Q62084   | Protein phosphatase 1 regulatory subunit 14B OS=Mus musculus GN=Ppp1r14b PE=1 SV=2 - [PP14B_MOUSE]                           | 30.61 | 1  | 3  | 3  | 9   | 1.812 | 0.802 | 0.947 | 1.328 | 39.99   | 30.61 | 5  | 9   | 147 | 15.9  | 4.86 |

|          |                                                                                                                     |       |   |    |    |     |       |       |       |       |         |       |     |     |      |       |       |
|----------|---------------------------------------------------------------------------------------------------------------------|-------|---|----|----|-----|-------|-------|-------|-------|---------|-------|-----|-----|------|-------|-------|
| F6UT49   | Glyceraldehyde-3-phosphate dehydrogenase OS=Mus musculus GN=Gm7251 PE=3 SV=1 - [F6UT49_MOUSE]                       | 28.66 | 1 | 3  | 11 | 197 | 1.826 | 1.439 | 1.267 | 1.329 | 424.32  | 28.66 | 19  | 197 | 335  | 36.2  | 8.05  |
| Q9ERS2   | NADH dehydrogenase [ubiquinone] 1 alpha subcomplex subunit 13 OS=Mus musculus GN=Ndufa13 PE=1 SV=3 - [Q9ERS2_MOUSE] | 63.19 | 1 | 11 | 12 | 131 | 0.855 | 1.083 | 1.087 | 1.329 | 365.84  | 63.19 | 21  | 131 | 144  | 16.8  | 9.48  |
| Q9D7X1   | BTB/POZ domain-containing protein KCTD4 OS=Mus musculus GN=Kctd4 PE=2 SV=1 - [KCTD4_MOUSE]                          | 23.55 | 1 | 5  | 5  | 13  | 0.961 | 1.762 | 1.273 | 1.329 | 48.97   | 23.55 | 9   | 13  | 259  | 30.0  | 7.06  |
| Q61133   | Glutathione S-transferase theta-2 OS=Mus musculus GN=Gstt2 PE=2 SV=4 - [GSTT2_MOUSE]                                | 13.11 | 1 | 2  | 3  | 10  | 2.146 | 1.636 | 1.015 | 1.329 | 26.45   | 13.11 | 6   | 10  | 244  | 27.6  | 7.55  |
| A2AQ07   | Tubulin beta-1 chain OS=Mus musculus GN=Tubb1 PE=1 SV=1 - [TBBI_MOUSE]                                              | 31.93 | 1 | 3  | 11 | 485 | 2.244 | 2.123 | 1.194 | 1.329 | 1036.46 | 31.93 | 18  | 485 | 451  | 50.4  | 5.07  |
| Q9QUG3   | Prion-like protein doppel OS=Mus musculus GN=Prnd PE=1 SV=1 - [PRND_MOUSE]                                          | 6.15  | 1 | 1  | 1  | 1   | 0.628 | 1.115 | 1.612 | 1.330 | 0.00    | 6.15  | 1   | 1   | 179  | 20.4  | 9.41  |
| P21107   | Tropomyosin alpha-3 chain OS=Mus musculus GN=Tpm3 PE=1 SV=3 - [TPM3_MOUSE]                                          | 32.28 | 2 | 1  | 14 | 247 | 2.450 | 1.393 | 2.583 | 1.330 | 640.89  | 32.28 | 24  | 247 | 285  | 33.0  | 4.72  |
| Q3TL44   | NLR family member X1 OS=Mus musculus GN=Nlr1 PE=2 SV=1 - [NLRX1_MOUSE]                                              | 13.44 | 1 | 12 | 12 | 31  | 0.656 | 1.235 | 1.149 | 1.330 | 94.06   | 13.44 | 21  | 31  | 975  | 107.8 | 7.37  |
| F7CVL0   | Protein Dot1 (Fragment) OS=Mus musculus GN=Dot1 PE=2 SV=1 - [F7CVL0_MOUSE]                                          | 4.08  | 2 | 4  | 4  | 5   | 0.772 | 1.240 | 1.640 | 1.330 | 13.25   | 4.08  | 4   | 5   | 1202 | 128.6 | 9.72  |
| Q9QZD8   | Mitochondrial dicarboxylate carrier OS=Mus musculus GN=Slc25a10 PE=2 SV=2 - [Q9QZD8_MOUSE]                          | 27.87 | 1 | 9  | 9  | 26  | 1.272 | 1.256 | 1.061 | 1.330 | 58.88   | 27.87 | 15  | 26  | 287  | 31.7  | 9.32  |
| F6QP10   | Sn1-specific diacylglycerol lipase beta (Fragment) OS=Mus musculus GN=Daglb PE=4 SV=2 - [F6QP10_MOUSE]              | 4.09  | 2 | 2  | 2  | 3   | 0.277 | 0.624 | 1.179 | 1.330 | 7.89    | 4.09  | 3   | 3   | 587  | 64.6  | 6.44  |
| Q8BGH2   | Sorting and assembly machinery component 50 homolog OS=Mus musculus GN=Samm50 PE=1 SV=1 - [Samm50_MOUSE]            | 44.56 | 1 | 20 | 20 | 94  | 0.765 | 1.071 | 1.134 | 1.331 | 297.88  | 44.56 | 35  | 94  | 469  | 51.8  | 6.80  |
| Q9D8N3   | Lysoplasmalogenase-like protein TMEM86A OS=Mus musculus GN=Tmem86a PE=2 SV=1 - [TM86A_MOUSE]                        | 15.35 | 1 | 2  | 3  | 5   | 0.417 | 0.752 | 1.437 | 1.331 | 2.56    | 15.35 | 3   | 5   | 241  | 26.3  | 8.56  |
| P39053-3 | Isoform 3 of Dynamin-1 OS=Mus musculus GN=Dnm1 - [DYN1_MOUSE]                                                       | 75.44 | 5 | 2  | 59 | 946 | 1.398 | 1.023 | 1.593 | 1.331 | 2459.25 | 75.44 | 110 | 946 | 851  | 95.9  | 6.76  |
| Q9D7V9   | N-acyl ethanolamine-hydrolyzing acid amidase OS=Mus musculus GN=Naaa PE=2 SV=2 - [NAAA_MOUSE]                       | 9.67  | 3 | 3  | 3  | 6   | 1.210 | 2.361 | 1.708 | 1.331 | 13.04   | 9.67  | 4   | 6   | 362  | 40.0  | 6.46  |
| Q9D6Y7-2 | Isoform 2 of Mitochondrial peptide methionine sulfoxide reductase OS=Mus musculus GN=MsrA - [MSRA_MOUSE]            | 48.36 | 4 | 8  | 8  | 53  | 1.000 | 0.847 | 1.145 | 1.331 | 150.93  | 48.36 | 16  | 53  | 213  | 23.8  | 7.20  |
| D3Z511   | Protein eva-1 homolog A (Fragment) OS=Mus musculus GN=Eva1a PE=2 SV=1 - [D3Z511_MOUSE]                              | 16.13 | 2 | 2  | 2  | 10  | 1.008 | 0.858 | 1.329 | 1.331 | 30.96   | 16.13 | 3   | 10  | 155  | 17.6  | 6.55  |
| Q9EPX2   | Papilin OS=Mus musculus GN=Papln PE=2 SV=2 - [PPN_MOUSE]                                                            | 5.47  | 2 | 5  | 5  | 7   | 2.073 | 1.020 | 1.218 | 1.331 | 20.71   | 5.47  | 7   | 7   | 1280 | 138.8 | 7.75  |
| A2AM67   | SH2 domain-containing protein 5 OS=Mus musculus GN=Sh2d5 PE=2 SV=1 - [A2AM67_MOUSE]                                 | 19.81 | 3 | 7  | 7  | 23  | 0.570 | 1.221 | 1.471 | 1.332 | 81.06   | 19.81 | 13  | 23  | 429  | 47.4  | 8.47  |
| H7BXB9   | Protein 1700037H04Rik (Fragment) OS=Mus musculus GN=1700037H04Rik PE=2 SV=1 - [H7BXB9_MOUSE]                        | 46.10 | 3 | 5  | 5  | 15  | 1.317 | 1.167 | 0.965 | 1.332 | 52.28   | 46.10 | 9   | 15  | 141  | 15.8  | 8.32  |
| D3Z2L5   | Beta-crystallin B3 (Fragment) OS=Mus musculus GN=Crybb3 PE=2 SV=1 - [D3Z2L5_MOUSE]                                  | 18.46 | 4 | 1  | 1  | 1   | 1.534 | 1.415 | 1.116 | 1.332 | 0.00    | 18.46 | 1   | 1   | 65   | 6.8   | 4.94  |
| Q9WV92-8 | Isoform 8 of Band 4.1-like protein 3 OS=Mus musculus GN=Epb41l3 - [E41L3_MOUSE]                                     | 41.25 | 2 | 3  | 44 | 403 | 0.897 | 0.981 | 1.427 | 1.332 | 1243.53 | 41.25 | 80  | 403 | 1052 | 116.7 | 5.22  |
| J3QQ15   | Protein Wdr49 OS=Mus musculus GN=Wdr49 PE=4 SV=1 - [J3QQ15_MOUSE]                                                   | 2.90  | 1 | 1  | 1  | 3   | 1.669 | 0.472 | 1.496 | 1.332 | 2.12    | 2.90  | 1   | 3   | 448  | 51.0  | 7.80  |
| Q9CQ69   | Cytochrome b-c1 complex subunit 8 OS=Mus musculus GN=Uqcrcq PE=1 SV=3 - [QCR8_MOUSE]                                | 82.93 | 2 | 6  | 6  | 101 | 0.690 | 0.940 | 1.143 | 1.333 | 273.63  | 82.93 | 11  | 101 | 82   | 9.8   | 10.26 |
| Q9D0M3-2 | Isoform 2 of Cytochrome c1, heme protein, mitochondrial OS=Mus musculus GN=Cyc1 - [Q9D0M3_MOUSE]                    | 47.37 | 2 | 10 | 10 | 307 | 0.885 | 1.054 | 1.179 | 1.333 | 939.47  | 47.37 | 18  | 307 | 266  | 29.5  | 7.05  |

|          |                                                                                                                                           |       |   |    |    |     |        |       |       |       |        |       |     |     |      |       |       |
|----------|-------------------------------------------------------------------------------------------------------------------------------------------|-------|---|----|----|-----|--------|-------|-------|-------|--------|-------|-----|-----|------|-------|-------|
| Q8BHJ6   | Serine incorporator 5<br>OS=Mus musculus<br>GN=Serinc5 PE=2 SV=1 -<br>[SERCS_MOUSE]                                                       | 7.59  | 1 | 3  | 3  | 4   | 0.645  | 0.360 | 1.127 | 1.334 | 9.54   | 7.59  | 4   | 4   | 461  | 51.8  | 8.07  |
| B0V2H4   | V-type proton ATPase<br>subunit G 2 OS=Mus<br>musculus GN=Atp6v1g2<br>PE=2 SV=1 -                                                         | 48.39 | 2 | 1  | 3  | 101 | 1.195  | 0.938 | 1.837 | 1.334 | 283.36 | 48.39 | 5   | 101 | 93   | 10.9  | 10.24 |
| E9QAS3   | Tyrosine-protein<br>phosphatase non-receptor<br>type 22 OS=Mus musculus<br>GN=Ptpn22 PE=2 SV=1 -<br>[E9QAS3_MOUSE]                        | 5.45  | 2 | 2  | 2  | 4   | 1.606  | 1.339 | 1.605 | 1.334 | 0.00   | 5.45  | 2   | 4   | 715  | 80.1  | 6.16  |
| L7N2D1   | Uncharacterized protein<br>OS=Mus musculus<br>GN=Gm9312 PE=4 SV=1 -<br>[L7N2D1_MOUSE]                                                     | 15.32 | 4 | 1  | 2  | 5   | 3.148  | 1.293 | 2.095 | 1.334 | 9.34   | 15.32 | 4   | 5   | 111  | 11.7  | 7.25  |
| Q8BIG7   | Catechol O-<br>methyltransferase domain-<br>containing protein 1<br>OS=Mus musculus<br>GN=Comtd1 PE=2 SV=1 -<br>[L7N2D1_MOUSE]            | 41.98 | 2 | 7  | 7  | 28  | 0.812  | 0.992 | 0.875 | 1.334 | 79.14  | 41.98 | 11  | 28  | 262  | 28.9  | 8.32  |
| E9Q7N9   | Protein Dnah11 OS=Mus<br>musculus GN=Dnah11<br>PE=4 SV=2 -<br>[E9Q7N9_MOUSE]                                                              | 1.00  | 2 | 2  | 5  | 9   | 0.755  | 1.005 | 1.592 | 1.334 | 15.48  | 1.00  | 8   | 9   | 4488 | 516.0 | 6.14  |
| Q924W5   | Structural maintenance of<br>chromosomes protein 6<br>OS=Mus musculus<br>GN=Smc6 PE=2 SV=1 -<br>[SMC6_MOUSE]                              | 1.46  | 1 | 2  | 2  | 2   | 1.833  | 0.570 | 2.048 | 1.334 | 4.04   | 1.46  | 2   | 2   | 1097 | 127.1 | 7.17  |
| Q60991   | 25-hydroxycholesterol 7-<br>alpha-hydroxylase<br>OS=Mus musculus<br>GN=Cyp7b1 PE=2 SV=2 -<br>[CP7B1_MOUSE]                                | 8.28  | 1 | 3  | 4  | 17  | 0.847  | 0.912 | 1.108 | 1.335 | 39.30  | 8.28  | 7   | 17  | 507  | 58.4  | 9.09  |
| Q91XF0   | Pyridoxine-5-phosphate<br>oxidase OS=Mus musculus<br>GN=Ppno PE=1 SV=1 -<br>[PNPO_MOUSE]                                                  | 40.23 | 2 | 9  | 9  | 48  | 1.669  | 0.825 | 1.122 | 1.335 | 127.11 | 40.23 | 15  | 48  | 261  | 30.1  | 8.22  |
| P08071   | Lactotransferrin OS=Mus<br>musculus GN=Ltf PE=2<br>SV=4 - [TRFL_MOUSE]                                                                    | 8.06  | 1 | 3  | 4  | 8   | 3.545  | 1.537 | 1.112 | 1.335 | 9.07   | 8.06  | 4   | 8   | 707  | 77.8  | 8.53  |
| P62880   | Guanine nucleotide-<br>binding protein<br>G(1)/G(S)/G(T) subunit<br>beta-2 OS=Mus musculus<br>GN=Gnb2 PE=1 SV=3 -<br>[GDB2_MOUSE]         | 60.29 | 6 | 8  | 16 | 263 | 1.136  | 1.330 | 1.248 | 1.336 | 962.14 | 60.29 | 28  | 263 | 340  | 37.3  | 6.00  |
| E5FYH1   | Testis- and ovary-specific<br>PAZ domain-containing<br>protein 1 OS=Mus<br>musculus GN=Topaz1<br>PE=2 SV=1 -<br>[TOPAZ1_MOUSE]            | 1.57  | 1 | 2  | 2  | 2   | 5.173  | 1.929 | 1.963 | 1.336 | 2.10   | 1.57  | 2   | 2   | 1653 | 185.4 | 7.72  |
| D6R1Z3   | Major facilitator<br>superfamily domain-<br>containing protein 10<br>OS=Mus musculus<br>GN=Mfsd10 PE=2 SV=1 -<br>[MFS10_MOUSE]            | 10.89 | 4 | 1  | 1  | 4   | 1.211  | 1.549 | 1.354 | 1.336 | 9.84   | 10.89 | 2   | 4   | 101  | 11.3  | 9.74  |
| Q9DBG5   | Perilipin-3 OS=Mus<br>musculus GN=Plin3 PE=1<br>SV=1 - [PLIN3_MOUSE]                                                                      | 46.68 | 1 | 14 | 14 | 78  | 1.698  | 0.838 | 1.338 | 1.336 | 241.16 | 46.68 | 23  | 78  | 437  | 47.2  | 5.62  |
| Q8BHJ9   | Pre-mRNA-splicing factor<br>SLU7 OS=Mus musculus<br>GN=Slu7 PE=1 SV=1 -<br>[SLU7_MOUSE]                                                   | 12.48 | 1 | 5  | 5  | 10  | 19.127 | 1.349 | 1.989 | 1.337 | 23.51  | 12.48 | 6   | 10  | 585  | 68.0  | 7.08  |
| H3BJY2   | Arf-GAP with SH3 domain,<br>ANK repeat and PH<br>domain-containing protein<br>1 OS=Mus musculus<br>GN=Asap1 PE=2 SV=1 -<br>[H3BJY2_MOUSE] | 42.48 | 9 | 4  | 37 | 151 | 0.976  | 1.177 | 0.993 | 1.337 | 439.30 | 42.48 | 61  | 151 | 1144 | 126.9 | 7.43  |
| E9Q3L2   | Protein Pi4ka OS=Mus<br>musculus GN=Pi4ka PE=4<br>SV=1 - [E9Q3L2_MOUSE]                                                                   | 33.61 | 6 | 62 | 62 | 211 | 0.535  | 1.112 | 1.247 | 1.338 | 602.84 | 33.61 | 107 | 211 | 2044 | 231.2 | 6.87  |
| P47738   | Aldehyde dehydrogenase,<br>mitochondrial OS=Mus<br>musculus GN=Aldh2 PE=1<br>SV=1 - [ALDH2_MOUSE]                                         | 57.42 | 3 | 22 | 25 | 190 | 0.700  | 1.387 | 0.908 | 1.338 | 634.46 | 57.42 | 43  | 190 | 519  | 56.5  | 7.62  |
| Q8CC27-4 | Isoform 4 of voltage-<br>dependent L-type calcium<br>channel subunit beta-2<br>OS=Mus musculus<br>GN=Cacnb2 -<br>[CACNB2_MOUSE]           | 26.53 | 6 | 6  | 12 | 51  | 0.845  | 1.106 | 1.362 | 1.339 | 129.63 | 26.53 | 22  | 51  | 573  | 64.7  | 9.07  |
| P31650   | Sodium- and chloride-<br>dependent GABA<br>transporter 3 OS=Mus<br>musculus GN=Slc6a11<br>PE=1 SV=2 -<br>[SLC6A11_MOUSE]                  | 15.31 | 1 | 9  | 11 | 168 | 0.718  | 0.429 | 0.755 | 1.339 | 489.93 | 15.31 | 21  | 168 | 627  | 69.9  | 6.98  |
| B1AUES   | Peroxisome biogenesis<br>factor 10 OS=Mus<br>musculus GN=Pex10 PE=2<br>SV=1 - [PEX10_MOUSE]                                               | 8.33  | 1 | 2  | 2  | 7   | 0.785  | 1.148 | 1.398 | 1.339 | 8.20   | 8.33  | 3   | 7   | 324  | 37.1  | 9.94  |
| Q9JKS4-3 | Isoform 3 of LIM domain-<br>binding protein 3 OS=Mus<br>musculus GN=Ldb3 -<br>[LDB3_MOUSE]                                                | 15.89 | 7 | 8  | 9  | 19  | 1.031  | 3.030 | 1.416 | 1.340 | 54.15  | 15.89 | 13  | 19  | 661  | 70.7  | 7.96  |
| P20352   | Tissue factor OS=Mus<br>musculus GN=F3 PE=1<br>SV=2 - [TF_MOUSE]                                                                          | 30.61 | 1 | 7  | 7  | 18  | 1.148  | 1.290 | 1.287 | 1.340 | 50.25  | 30.61 | 12  | 18  | 294  | 32.9  | 9.32  |
| Q9CX10   | 2-methoxy-6-polyprenyl-<br>1,4-benzoquinol<br>methylase, mitochondrial<br>OS=Mus musculus<br>GN=Cox5 PE=2 SV=2 -<br>[COX5_MOUSE]          | 40.98 | 2 | 10 | 10 | 32  | 1.265  | 1.643 | 1.229 | 1.340 | 96.39  | 40.98 | 18  | 32  | 327  | 37.3  | 7.49  |

|          |                                                                                                                        |       |    |    |    |      |       |       |       |       |         |       |    |      |      |       |      |
|----------|------------------------------------------------------------------------------------------------------------------------|-------|----|----|----|------|-------|-------|-------|-------|---------|-------|----|------|------|-------|------|
| Q62219-2 | Isoform 2 of Transforming growth factor beta-1-induced transcript 1 protein OS=Mus musculus GN=Tgfb11 - [TGFBI1_MOUSE] | 26.80 | 11 | 7  | 7  | 37   | 1.335 | 2.482 | 1.276 | 1.341 | 112.21  | 26.80 | 12 | 37   | 444  | 48.2  | 7.23 |
| P56564   | Excitatory amino acid transporter 1 OS=Mus musculus GN=Slc1a3 PE=1 SV=2 - [SLC1A3_MOUSE]                               | 18.23 | 2  | 5  | 9  | 229  | 0.443 | 1.518 | 1.095 | 1.341 | 797.15  | 18.23 | 14 | 229  | 543  | 59.6  | 8.40 |
| Q9QUT0   | Ammonium transporter Rh type A OS=Mus musculus GN=Rhag PE=2 SV=1 - [RHAG_MOUSE]                                        | 9.82  | 1  | 2  | 2  | 9    | 1.243 | 0.470 | 1.679 | 1.341 | 11.28   | 9.82  | 2  | 9    | 438  | 47.8  | 6.47 |
| Q9CZP5   | Mitochondrial chaperone BCS1 OS=Mus musculus GN=Bcs1 PE=1 SV=1 - [BCS1_MOUSE]                                          | 44.98 | 1  | 16 | 16 | 48   | 0.618 | 1.155 | 1.172 | 1.341 | 148.91  | 44.98 | 28 | 48   | 418  | 47.4  | 7.93 |
| Q9CYS6   | Uncharacterized protein C2orf72 homolog OS=Mus musculus PE=2 SV=2 - [CB072_MOUSE]                                      | 31.82 | 2  | 4  | 4  | 14   | 0.437 | 1.010 | 1.143 | 1.342 | 33.92   | 31.82 | 6  | 14   | 286  | 30.3  | 6.05 |
| P56388-2 | Isoform Short of Cocaine- and amphetamine-regulated transcript protein OS=Mus musculus GN=Cartpt - [CART_MOUSE]        | 43.97 | 1  | 1  | 6  | 16   | 0.880 | 0.653 | 1.196 | 1.343 | 49.50   | 43.97 | 11 | 16   | 116  | 12.8  | 8.25 |
| O88935   | Synapsin-1 OS=Mus musculus GN=Syn1 PE=1 SV=2 - [SYN1_MOUSE]                                                            | 73.65 | 3  | 38 | 41 | 1507 | 1.009 | 1.588 | 1.627 | 1.343 | 4429.29 | 73.65 | 78 | 1507 | 706  | 74.1  | 9.80 |
| Q91JG7   | Calcium-binding protein 8 OS=Mus musculus GN=Caln1 PE=2 SV=1 - [CABP8_MOUSE]                                           | 7.76  | 2  | 1  | 1  | 1    | 1.242 | 1.069 | 1.611 | 1.343 | 2.86    | 7.76  | 1  | 1    | 219  | 24.8  | 4.84 |
| P56135   | ATP synthase subunit f, mitochondrial OS=Mus musculus GN=Atp5f2 PE=1 SV=3 - [ATPK_MOUSE]                               | 32.95 | 2  | 3  | 3  | 125  | 0.746 | 0.854 | 1.161 | 1.343 | 332.36  | 32.95 | 5  | 125  | 88   | 10.3  | 9.95 |
| A2AE27   | AMP deaminase 2 OS=Mus musculus GN=Ampd2 PE=4 SV=1 - [A2AE27_MOUSE]                                                    | 33.13 | 7  | 28 | 28 | 109  | 1.017 | 0.890 | 1.026 | 1.343 | 304.33  | 33.13 | 45 | 109  | 824  | 94.6  | 6.51 |
| Q60976   | Jerky protein OS=Mus musculus GN=Jrk PE=2 SV=2 - [JERKY_MOUSE]                                                         | 2.15  | 1  | 1  | 1  | 1    | 1.896 | 1.066 | 1.227 | 1.344 | 2.07    | 2.15  | 1  | 1    | 557  | 62.4  | 8.95 |
| P51881   | ADP/ATP translocase 2 OS=Mus musculus GN=Slc25a5 PE=1 SV=3 - [ADT2_MOUSE]                                              | 66.11 | 1  | 10 | 24 | 594  | 0.722 | 0.783 | 1.231 | 1.344 | 1594.31 | 66.11 | 46 | 594  | 298  | 32.9  | 9.73 |
| Q91W92   | Cdc42 effector protein 1 OS=Mus musculus GN=Cdc42ep1 PE=1 SV=1 - [BORGS_MOUSE]                                         | 19.07 | 1  | 4  | 4  | 17   | 2.024 | 0.609 | 1.342 | 1.344 | 65.16   | 19.07 | 8  | 17   | 409  | 43.1  | 7.21 |
| Q8BH95   | Enoyl-CoA hydratase, mitochondrial OS=Mus musculus GN=Echs1 PE=1 SV=1 - [ECHM_MOUSE]                                   | 51.03 | 2  | 17 | 17 | 118  | 1.311 | 1.234 | 1.118 | 1.344 | 360.43  | 51.03 | 33 | 118  | 290  | 31.5  | 8.48 |
| Q66L42   | Mitogen-activated protein kinase kinase 10 OS=Mus musculus GN=Map3k10 PE=2 SV=2 - [M3K10_MOUSE]                        | 5.43  | 3  | 3  | 4  | 9    | 0.805 | 1.275 | 1.190 | 1.345 | 20.22   | 5.43  | 7  | 9    | 940  | 103.1 | 6.87 |
| Q3U3R4-2 | Isoform 2 of Lipase maturation factor 1 OS=Mus musculus GN=Lmf1 - [LIPM1_MOUSE]                                        | 13.58 | 7  | 7  | 7  | 17   | 1.035 | 1.297 | 1.185 | 1.345 | 39.08   | 13.58 | 11 | 17   | 567  | 65.0  | 9.29 |
| E9PV80   | Nuclear receptor coactivator 2 OS=Mus musculus GN=Ncoa2 PE=4 SV=1 - [E9PV80_MOUSE]                                     | 7.75  | 3  | 8  | 8  | 19   | 2.688 | 1.338 | 1.172 | 1.345 | 43.92   | 7.75  | 10 | 19   | 1393 | 151.3 | 6.62 |
| P20491   | High affinity immunoglobulin epsilon receptor subunit gamma OS=Mus musculus GN=Fcer1g PE=1 SV=1 - [FCER1G_MOUSE]       | 25.58 | 1  | 3  | 3  | 7    | 0.977 | 1.700 | 1.233 | 1.345 | 19.42   | 25.58 | 6  | 7    | 86   | 9.6   | 7.97 |
| J3QP51   | Endophilin-A3 (Fragment) OS=Mus musculus GN=Sh3g3 PE=4 SV=1 - [J3QP51_MOUSE]                                           | 68.12 | 1  | 1  | 15 | 51   | 1.445 | 1.238 | 1.146 | 1.345 | 159.94  | 68.12 | 25 | 51   | 229  | 24.9  | 5.81 |
| Q8CGA0   | Protein phosphatase 1F OS=Mus musculus GN=Ppm1f PE=2 SV=1 - [PPM1F_MOUSE]                                              | 40.71 | 1  | 12 | 12 | 46   | 0.799 | 1.107 | 0.974 | 1.346 | 141.57  | 40.71 | 21 | 46   | 452  | 49.6  | 5.30 |
| Q5F226   | Protocadherin Fat 2 OS=Mus musculus GN=Fat2 PE=2 SV=1 - [FAT2_MOUSE]                                                   | 3.75  | 1  | 8  | 8  | 9    | 1.361 | 1.258 | 0.904 | 1.346 | 10.27   | 3.75  | 8  | 9    | 4351 | 479.8 | 5.12 |
| Q99MN9   | Propionyl-CoA carboxylase beta chain, mitochondrial OS=Mus musculus GN=Pccb PE=1 SV=2 - [PCCB_MOUSE]                   | 48.80 | 3  | 20 | 20 | 96   | 0.700 | 1.184 | 1.112 | 1.346 | 299.69  | 48.80 | 37 | 96   | 541  | 58.4  | 7.66 |
| Q8CS22   | Endonuclease domain-containing 1 protein OS=Mus musculus GN=Endod1 PE=1 SV=2 - [ENDD1_MOUSE]                           | 33.33 | 1  | 12 | 12 | 135  | 0.893 | 0.548 | 0.909 | 1.346 | 394.35  | 33.33 | 22 | 135  | 501  | 55.2  | 6.16 |
| P70404   | Isocitrate dehydrogenase [NAD] subunit gamma 1, mitochondrial OS=Mus musculus GN=Idh3g PE=1 SV=1 - [IDHG1_MOUSE]       | 51.91 | 1  | 16 | 17 | 182  | 0.722 | 0.895 | 1.160 | 1.346 | 567.50  | 51.91 | 31 | 182  | 393  | 42.8  | 9.01 |
| E9PX91   | Phosphatidylserine decarboxylase proenzyme OS=Mus musculus GN=Pisd PE=2 SV=1 - [E9PX91_MOUSE]                          | 14.40 | 6  | 5  | 5  | 12   | 0.643 | 0.900 | 1.037 | 1.347 | 24.35   | 14.40 | 10 | 12   | 375  | 42.7  | 9.60 |

|          |                                                                                                                                       |       |    |    |    |     |        |       |       |       |         |       |    |     |      |       |      |
|----------|---------------------------------------------------------------------------------------------------------------------------------------|-------|----|----|----|-----|--------|-------|-------|-------|---------|-------|----|-----|------|-------|------|
| G3UVV4   | Hexokinase 1, isoform CRA_f OS=Mus musculus GN=Hk1 PE=3 SV=1 - [G3UVV4_MOUSE]                                                         | 52.45 | 10 | 44 | 51 | 620 | 0.574  | 1.314 | 1.153 | 1.347 | 1826.72 | 52.45 | 93 | 620 | 917  | 101.8 | 6.67 |
| Q6P1E8   | EF-hand calcium-binding domain-containing protein 6 OS=Mus musculus GN=Efcab6 PE=1 SV=2 - [EFCB6_MOUSE]                               | 1.19  | 1  | 1  | 1  | 2   | 11.654 | 2.339 | 2.810 | 1.347 | 2.95    | 1.19  | 1  | 2   | 1516 | 175.7 | 8.87 |
| Q000W5   | Guanylate-binding protein 10 OS=Mus musculus GN=Gbp10 PE=2 SV=1 - [Q000W5_MOUSE]                                                      | 9.33  | 2  | 2  | 4  | 6   | 0.754  | 1.043 | 0.895 | 1.348 | 15.02   | 9.33  | 6  | 6   | 611  | 70.4  | 6.46 |
| P63115   | Asc-type amino acid transporter 1 OS=Mus musculus GN=Slc7a10 PE=1 SV=1 - [P63115_MOUSE]                                               | 8.30  | 4  | 3  | 3  | 12  | 1.119  | 0.428 | 0.920 | 1.349 | 38.54   | 8.30  | 4  | 12  | 530  | 57.5  | 8.44 |
| F7BNZ5   | Breast carcinoma-amplified sequence 1 homolog (Fragment) OS=Mus musculus GN=Bcas1 PE=4 SV=1 - [F7BNZ5_MOUSE]                          | 58.31 | 1  | 1  | 23 | 236 | 1.133  | 0.167 | 2.169 | 1.349 | 658.13  | 58.31 | 39 | 236 | 379  | 40.5  | 9.03 |
| O88502   | High affinity cAMP-specific and IBMX-insensitive 3',5'-cyclic phosphodiesterase 8A OS=Mus musculus GN=Pde8a PE=1 SV=1 - [PDE8A_MOUSE] | 12.88 | 2  | 6  | 8  | 13  | 0.907  | 0.529 | 1.191 | 1.349 | 31.29   | 12.88 | 11 | 13  | 823  | 93.1  | 5.85 |
| B1AQZ0   | Septin-8 OS=Mus musculus GN=Sept8 PE=2 SV=1 - [B1AQZ0_MOUSE]                                                                          | 52.89 | 7  | 15 | 20 | 249 | 1.252  | 1.068 | 1.545 | 1.350 | 701.64  | 52.89 | 38 | 249 | 484  | 55.8  | 6.10 |
| P41539   | Protachykinin-1 OS=Mus musculus GN=Tac1 PE=2 SV=1 - [TKN1_MOUSE]                                                                      | 21.54 | 2  | 3  | 3  | 19  | 1.605  | 0.914 | 1.262 | 1.350 | 60.12   | 21.54 | 5  | 19  | 130  | 15.0  | 9.23 |
| Q8BMF3   | NADP-dependent malic enzyme, mitochondrial OS=Mus musculus GN=Me3 PE=1 SV=2 - [MAON_MOUSE]                                            | 38.41 | 2  | 19 | 20 | 119 | 1.043  | 3.164 | 1.308 | 1.350 | 344.06  | 38.41 | 35 | 119 | 604  | 67.1  | 7.83 |
| E9PV55   | Mitochondrial inner membrane protein (Fragment) OS=Mus musculus GN=Immt PE=2 SV=1 - [E9PV55_MOUSE]                                    | 67.55 | 1  | 2  | 13 | 63  | 0.818  | 1.154 | 1.306 | 1.351 | 166.58  | 67.55 | 23 | 63  | 188  | 19.7  | 9.09 |
| Q80T23-2 | Isoform 2 of Synaptotagmin-like protein 5 OS=Mus musculus GN=Sytl5 - [Q80T23-2_MOUSE]                                                 | 10.12 | 2  | 4  | 6  | 11  | 1.463  | 1.168 | 1.503 | 1.352 | 32.14   | 10.12 | 9  | 11  | 731  | 81.7  | 8.78 |
| Q9EPR4   | Solute carrier family 23 member 2 OS=Mus musculus GN=Slc23a2 PE=1 SV=2 - [Q9EPR4_MOUSE]                                               | 3.70  | 2  | 2  | 2  | 2   | 0.970  | 1.206 | 0.990 | 1.352 | 5.99    | 3.70  | 2  | 2   | 648  | 70.0  | 7.50 |
| P09026   | Homeobox protein Hox-B3 OS=Mus musculus GN=Hoxb3 PE=2 SV=4 - [HXB3_MOUSE]                                                             | 4.16  | 2  | 2  | 2  | 2   | 5.290  | 2.139 | 1.654 | 1.353 | 5.23    | 4.16  | 2  | 2   | 433  | 44.3  | 9.16 |
| Q91Y10   | Argininosuccinate lyase OS=Mus musculus GN=Asl PE=2 SV=1 - [ARLY_MOUSE]                                                               | 31.90 | 5  | 14 | 15 | 45  | 0.993  | 1.325 | 1.035 | 1.353 | 129.12  | 31.90 | 25 | 45  | 464  | 51.7  | 6.96 |
| A8Y5N8   | Pleckstrin homology domain-containing family F member 2 (Fragment) OS=Mus musculus GN=Plekhf2 PE=2 SV=1 - [A8Y5N8_MOUSE]              | 15.74 | 2  | 1  | 2  | 3   | 0.605  | 0.430 | 1.118 | 1.353 | 10.00   | 15.74 | 2  | 3   | 197  | 22.1  | 9.45 |
| Q924X2   | Carnitine O-palmitoyltransferase 1, muscle isoform OS=Mus musculus GN=Cpt1b PE=2 SV=1 - [CPT1B_MOUSE]                                 | 3.11  | 1  | 1  | 1  | 1   | 0.970  | 2.037 | 1.755 | 1.353 | 0.00    | 3.11  | 1  | 1   | 772  | 88.2  | 8.38 |
| Q91X77   | Protein Pcdhgb6 OS=Mus musculus GN=Pcdhga12 PE=2 SV=1 - [Q91X77_MOUSE]                                                                | 15.67 | 1  | 5  | 10 | 33  | 2.177  | 1.356 | 1.072 | 1.354 | 84.62   | 15.67 | 15 | 33  | 932  | 100.8 | 4.97 |
| Q8BMD8   | Calcium-binding mitochondrial carrier protein ScaMC-1 OS=Mus musculus GN=Slc25a24 PE=2 SV=1 - [Q8BMD8_MOUSE]                          | 17.26 | 1  | 8  | 8  | 15  | 1.765  | 2.533 | 1.156 | 1.354 | 36.40   | 17.26 | 14 | 15  | 475  | 52.9  | 7.43 |
| G3LUX44  | Estradiol 17-beta-dehydrogenase 8 (Fragment) OS=Mus musculus GN=H2-Ke6 PE=2 SV=1 - [G3LUX44_MOUSE]                                    | 27.78 | 3  | 5  | 5  | 31  | 0.851  | 1.137 | 1.089 | 1.354 | 99.22   | 27.78 | 9  | 31  | 234  | 24.0  | 8.79 |
| F6X767   | Inositol polyphosphate multikinase (Fragment) OS=Mus musculus GN=Ipmlk PE=4 SV=1 - [F6X767_MOUSE]                                     | 47.83 | 1  | 1  | 1  | 1   | 1.279  | 1.139 | 1.028 | 1.355 | 0.00    | 47.83 | 1  | 1   | 23   | 2.6   | 5.72 |
| Q9ERE3   | Serine/threonine-protein kinase Sgk3 OS=Mus musculus GN=Sgk3 PE=1 SV=1 - [SGK3_MOUSE]                                                 | 1.81  | 1  | 1  | 1  | 2   | 2.235  | 1.079 | 1.455 | 1.355 | 4.26    | 1.81  | 2  | 2   | 496  | 57.1  | 7.15 |
| O35452   | Protein Trxb OS=Mus musculus GN=Trxb PE=4 SV=1 - [O35452_MOUSE]                                                                       | 4.07  | 2  | 5  | 5  | 12  | 1.308  | 1.299 | 1.372 | 1.356 | 12.86   | 4.07  | 7  | 12  | 4006 | 435.2 | 5.22 |
| Q9D8B7   | Junctional adhesion molecule C OS=Mus musculus GN=Jam3 PE=1 SV=2 - [JAM3_MOUSE]                                                       | 30.32 | 2  | 9  | 9  | 40  | 1.009  | 0.372 | 1.218 | 1.356 | 108.92  | 30.32 | 16 | 40  | 310  | 34.8  | 7.03 |
| Q04573   | Neuropeptide Y receptor type 1 OS=Mus musculus GN=Npy1r PE=2 SV=1 - [NPY1R_MOUSE]                                                     | 2.09  | 1  | 1  | 1  | 2   | 1.690  | 3.874 | 1.826 | 1.356 | 5.77    | 2.09  | 2  | 2   | 382  | 44.0  | 8.21 |

|          |                                                                                                                                                |       |    |    |    |     |       |        |       |       |        |       |    |     |      |       |      |
|----------|------------------------------------------------------------------------------------------------------------------------------------------------|-------|----|----|----|-----|-------|--------|-------|-------|--------|-------|----|-----|------|-------|------|
| Q61292   | Laminin subunit beta-2<br>OS=Mus musculus<br>GN=Lamb2 PE=2 SV=2 -<br>[LAMB2_MOUSE]                                                             | 26.51 | 1  | 39 | 41 | 177 | 1.201 | 1.686  | 1.257 | 1.356 | 532.28 | 26.51 | 75 | 177 | 1799 | 196.5 | 6.67 |
| Q8VCL5   | Solute carrier family 17<br>member 9 OS=Mus<br>musculus GN=Slc17a9<br>PE=1 SV=3 -                                                              | 4.03  | 1  | 1  | 1  | 1   | 2.348 | 1.958  | 1.476 | 1.356 | 3.52   | 4.03  | 1  | 1   | 447  | 48.4  | 8.50 |
| Q9WV54   | Acid ceramidase OS=Mus<br>musculus GN=Asah1 PE=1<br>SV=1 - [ASAH1_MOUSE]                                                                       | 31.47 | 3  | 12 | 12 | 57  | 1.319 | 1.352  | 1.245 | 1.357 | 154.89 | 31.47 | 24 | 57  | 394  | 44.6  | 8.46 |
| Q3UGX3   | N-acetylaspartate<br>synthetase OS=Mus<br>musculus GN=Nat8l PE=1<br>SV=1 - [NAT8L_MOUSE]                                                       | 9.70  | 1  | 3  | 3  | 4   | 1.121 | 0.686  | 1.146 | 1.357 | 9.03   | 9.70  | 4  | 4   | 299  | 32.8  | 8.53 |
| Q923K4   | tRNA modification GTPase<br>GTPBP3, mitochondrial<br>OS=Mus musculus<br>GN=Gtpbp3 PE=2 SV=1 -<br>[GTPB3_MOUSE]                                 | 18.50 | 4  | 4  | 4  | 9   | 0.637 | 1.378  | 0.931 | 1.357 | 26.22  | 18.50 | 7  | 9   | 492  | 52.1  | 6.05 |
| Q9Z2I9   | Succinyl-CoA ligase [ADP-<br>forming] subunit beta,<br>mitochondrial OS=Mus<br>musculus GN=Succla2<br>PE=1 SV=2 -<br>[SUCLA2_MOUSE]            | 56.37 | 1  | 25 | 25 | 313 | 0.744 | 1.039  | 1.177 | 1.358 | 893.20 | 56.37 | 49 | 313 | 463  | 50.1  | 7.01 |
| Q6PFE7-3 | Isoform 3 of Tomoregulin-<br>1 OS=Mus musculus<br>GN=Tmeff1 -<br>[TEFF1_MOUSE]                                                                 | 15.36 | 4  | 6  | 6  | 9   | 0.922 | 0.906  | 1.029 | 1.358 | 21.79  | 15.36 | 8  | 9   | 371  | 40.0  | 6.95 |
| B7ZCL8   | 55 kDa erythrocyte<br>membrane protein<br>OS=Mus musculus<br>GN=Mpp1 PE=2 SV=1 -<br>[B7ZCL8_MOUSE]                                             | 42.38 | 7  | 14 | 14 | 41  | 1.269 | 0.931  | 1.068 | 1.358 | 131.50 | 42.38 | 23 | 41  | 446  | 49.8  | 7.20 |
| P08121   | Collagen alpha-1(III) chain<br>OS=Mus musculus<br>GN=Col3a1 PE=1 SV=4 -<br>[CO3A1_MOUSE]                                                       | 14.21 | 1  | 8  | 8  | 10  | 0.711 | 10.535 | 0.977 | 1.358 | 26.35  | 14.21 | 9  | 10  | 1464 | 138.9 | 6.52 |
| Q912B5   | Mas-related G-protein<br>coupled receptor member<br>G OS=Mus musculus<br>GN=Mrgprg PE=2 SV=1 -<br>[MRGRG_MOUSE]                                | 4.50  | 1  | 1  | 1  | 1   | 1.610 | 1.806  | 1.529 | 1.359 | 1.60   | 4.50  | 1  | 1   | 289  | 32.0  | 8.81 |
| Q3UGH2   | Integrin beta-1-binding<br>protein 1 OS=Mus<br>musculus GN=Itgb1bp1<br>PE=2 SV=1 -                                                             | 10.11 | 3  | 1  | 2  | 2   | 1.078 | 1.240  | 2.207 | 1.359 | 6.40   | 10.11 | 2  | 2   | 188  | 20.5  | 7.40 |
| E9Q4A5   | Protein Gm1818 OS=Mus<br>musculus GN=Gm1818<br>PE=4 SV=1 -<br>[E9Q4A5_MOUSE]                                                                   | 3.54  | 1  | 1  | 1  | 1   | 0.851 | 0.273  | 1.542 | 1.359 | 0.00   | 3.54  | 1  | 1   | 396  | 45.8  | 9.09 |
| O35387   | HCLS1-associated protein<br>X-1 OS=Mus musculus<br>GN=Hax1 PE=1 SV=1 -<br>[HAX1_MOUSE]                                                         | 21.79 | 1  | 4  | 4  | 13  | 0.934 | 1.487  | 1.101 | 1.360 | 57.86  | 21.79 | 7  | 13  | 280  | 31.6  | 4.91 |
| Q81ZRO   | Long-chain-fatty-acid-CoA<br>ligase 5 OS=Mus musculus<br>GN=Acsl5 PE=2 SV=1 -<br>[ACSL5_MOUSE]                                                 | 12.59 | 1  | 7  | 9  | 21  | 1.039 | 1.360  | 1.419 | 1.360 | 48.03  | 12.59 | 15 | 21  | 683  | 76.2  | 7.09 |
| Q3TJD7   | PDZ and LIM domain<br>protein 7 OS=Mus<br>musculus GN=Pdlim7<br>PE=2 SV=1 -                                                                    | 23.85 | 7  | 9  | 10 | 24  | 0.866 | 3.413  | 1.022 | 1.360 | 72.35  | 23.85 | 15 | 24  | 457  | 50.1  | 8.47 |
| Q9QYG0-2 | Isoform 2 of Protein<br>NDRG2 OS=Mus musculus<br>GN=Ndrgr2 -<br>[NDRG2_MOUSE]                                                                  | 69.75 | 1  | 1  | 17 | 292 | 0.268 | 0.823  | 0.855 | 1.360 | 875.55 | 69.75 | 31 | 292 | 357  | 39.3  | 5.63 |
| O88703   | Potassium/sodium<br>hyperpolarization-activated<br>cyclic nucleotide-gated<br>channel 2 OS=Mus<br>musculus GN=Hcn2 PE=1<br>SV=1 - [HCN2_MOUSE] | 32.56 | 1  | 15 | 24 | 132 | 1.192 | 0.513  | 1.179 | 1.360 | 354.74 | 32.56 | 46 | 132 | 863  | 94.7  | 8.73 |
| Q9EQR6   | Fanconi anemia group G<br>protein homolog OS=Mus<br>musculus GN=Fancg PE=2<br>SV=1 - [FANCG_MOUSE]                                             | 13.16 | 1  | 3  | 3  | 4   | 4.872 | 3.148  | 1.117 | 1.361 | 2.05   | 13.16 | 3  | 4   | 623  | 68.5  | 5.38 |
| A3KGV1-2 | Isoform 2 of Outer dense<br>fiber protein 2 OS=Mus<br>musculus GN=Odf2 -<br>[ODFP2_MOUSE]                                                      | 5.33  | 10 | 3  | 3  | 4   | 1.453 | 1.191  | 1.318 | 1.361 | 11.12  | 5.33  | 3  | 4   | 806  | 93.2  | 7.06 |
| J3QK54   | Protein Fign2 OS=Mus<br>musculus GN=Fign2 PE=4<br>SV=1 - [J3QK54_MOUSE]                                                                        | 1.09  | 1  | 1  | 1  | 1   | 0.772 | 0.988  | 1.086 | 1.362 | 2.01   | 1.09  | 1  | 1   | 644  | 65.9  | 6.62 |
| P48758   | Carbonyl reductase<br>[NADPH] 1 OS=Mus<br>musculus GN=Cbr1 PE=1<br>SV=3 - [CBR1_MOUSE]                                                         | 79.42 | 1  | 19 | 21 | 141 | 0.759 | 1.534  | 1.078 | 1.362 | 392.76 | 79.42 | 39 | 141 | 277  | 30.6  | 8.31 |
| Q9D5I4   | Tctex1 domain-containing<br>protein 1 OS=Mus<br>musculus GN=Tctex1d1<br>PE=2 SV=1 -                                                            | 5.20  | 1  | 1  | 1  | 1   | 2.383 | 1.547  | 1.058 | 1.362 | 2.84   | 5.20  | 1  | 1   | 173  | 19.7  | 6.93 |
| O88848   | ADP-ribosylation factor-like<br>protein 6 OS=Mus<br>musculus GN=Arl6 PE=2<br>SV=1 - [ARL6_MOUSE]                                               | 55.38 | 3  | 7  | 8  | 21  | 0.878 | 1.146  | 1.073 | 1.363 | 59.98  | 55.38 | 12 | 21  | 186  | 20.9  | 8.25 |
| G5E869   | MCG133876, isoform<br>CRA_b OS=Mus musculus<br>GN=Zfp142 PE=4 SV=1 -<br>[G5E869_MOUSE]                                                         | 0.92  | 3  | 1  | 2  | 5   | 0.774 | 2.069  | 1.759 | 1.363 | 11.98  | 0.92  | 3  | 5   | 1843 | 206.1 | 7.88 |
| Q640R3   | Hepatocyte cell adhesion<br>molecule OS=Mus<br>musculus GN=Hepacam<br>PE=1 SV=2 -                                                              | 26.79 | 1  | 9  | 9  | 71  | 0.842 | 0.600  | 1.220 | 1.364 | 245.34 | 26.79 | 16 | 71  | 418  | 46.3  | 9.42 |
| P29391   | Ferritin light chain 1<br>OS=Mus musculus<br>GN=Fr1l PE=1 SV=2 -<br>[FRIL1_MOUSE]                                                              | 52.46 | 4  | 7  | 7  | 39  | 1.892 | 1.833  | 1.348 | 1.364 | 115.82 | 52.46 | 14 | 39  | 183  | 20.8  | 6.00 |

|          |                                                                                                                  |       |   |    |    |     |       |       |       |       |        |       |    |     |      |       |      |
|----------|------------------------------------------------------------------------------------------------------------------|-------|---|----|----|-----|-------|-------|-------|-------|--------|-------|----|-----|------|-------|------|
| K7N759   | Protein Gm8356 OS=Mus musculus GN=Gm8356 PE=4 SV=1 - [K7N759_MOUSE]                                              | 5.39  | 3 | 1  | 1  | 1   | 1.639 | 0.574 | 1.928 | 1.364 | 2.84   | 5.39  | 1  | 1   | 204  | 24.2  | 8.21 |
| P70452   | Syntaxin-4 OS=Mus musculus GN=Sbx4 PE=1 SV=1 - [STX4_MOUSE]                                                      | 35.57 | 2 | 10 | 10 | 41  | 1.377 | 0.946 | 1.226 | 1.364 | 104.70 | 35.57 | 19 | 41  | 298  | 34.1  | 6.14 |
| D3YTP3   | Protein Mtx3 OS=Mus musculus GN=Mtx3 PE=4 SV=2 - [D3YTP3_MOUSE]                                                  | 32.05 | 1 | 8  | 8  | 39  | 0.840 | 0.706 | 1.011 | 1.364 | 122.38 | 32.05 | 14 | 39  | 312  | 34.9  | 7.99 |
| Q9DB41-2 | Isoform 2 of Mitochondrial glutamate carrier 2 OS=Mus musculus GN=Slc25a18 - [GHC2_MOUSE]                        | 32.05 | 2 | 8  | 11 | 74  | 0.721 | 0.900 | 0.815 | 1.365 | 192.47 | 32.05 | 21 | 74  | 312  | 33.3  | 9.29 |
| Q9CWU6   | Ubiquinol-cytochrome c reductase complex chaperone CBP3 homolog OS=Mus musculus GN=Uqcc PE=2 SV=1 - [UQCC_MOUSE] | 29.15 | 8 | 7  | 7  | 34  | 0.837 | 0.993 | 1.104 | 1.366 | 89.32  | 29.15 | 12 | 34  | 295  | 34.3  | 8.48 |
| E9PV14   | Band 4.1-like protein 1 (Fragment) OS=Mus musculus GN=Epb4.111 PE=2 SV=1 - [E9PV14_MOUSE]                        | 52.07 | 1 | 22 | 44 | 254 | 2.270 | 0.575 | 1.549 | 1.367 | 794.72 | 52.07 | 77 | 254 | 1064 | 117.1 | 5.92 |
| E9Q7W7   | Protein Gm5155 OS=Mus musculus GN=Gm5155 PE=4 SV=2 - [E9Q7W7_MOUSE]                                              | 4.01  | 3 | 2  | 2  | 4   | 1.488 | 1.200 | 1.090 | 1.367 | 0.00   | 4.01  | 2  | 4   | 947  | 106.3 | 6.52 |
| P01837   | Ig kappa chain C region OS=Mus musculus PE=1 SV=1 - [IGKC_MOUSE]                                                 | 49.06 | 1 | 5  | 5  | 25  | 2.529 | 4.941 | 0.980 | 1.367 | 61.67  | 49.06 | 10 | 25  | 106  | 11.8  | 5.41 |
| Q7TNG8   | Probable D-lactate dehydrogenase, mitochondrial OS=Mus musculus GN=Ldhf PE=1 SV=1 - [LDHD_MOUSE]                 | 13.64 | 1 | 6  | 6  | 20  | 1.014 | 1.078 | 1.117 | 1.367 | 54.78  | 13.64 | 11 | 20  | 484  | 51.8  | 6.62 |
| Q3UXL4   | Centrosomal protein kizuna OS=Mus musculus GN=Plk1s1 PE=1 SV=1 - [KIZ_MOUSE]                                     | 2.88  | 1 | 2  | 2  | 4   | 1.909 | 1.479 | 1.096 | 1.367 | 10.13  | 2.88  | 4  | 4   | 695  | 76.5  | 5.62 |
| Q61923   | Potassium voltage-gated channel subfamily A member 6 OS=Mus musculus GN=Kcna6 PE=1 SV=1 - [KCN A6_MOUSE]         | 20.42 | 2 | 6  | 8  | 46  | 0.689 | 0.885 | 1.145 | 1.367 | 138.85 | 20.42 | 16 | 46  | 529  | 58.6  | 5.03 |
| Q8BN51   | Thymidine kinase 2, mitochondrial OS=Mus musculus GN=Tk2 PE=2 SV=1 - [Q8BN51_MOUSE]                              | 6.67  | 2 | 2  | 2  | 10  | 0.869 | 1.363 | 1.062 | 1.368 | 22.38  | 6.67  | 4  | 10  | 270  | 31.2  | 7.21 |
| P48318   | Glutamate decarboxylase 1 OS=Mus musculus GN=Gad1 PE=2 SV=2 - [DCE1_MOUSE]                                       | 35.75 | 5 | 10 | 19 | 119 | 0.626 | 0.932 | 1.065 | 1.369 | 342.54 | 35.75 | 31 | 119 | 593  | 66.6  | 7.17 |
| Q9QYR9   | Acyl-coenzyme A thioesterase 2, mitochondrial OS=Mus musculus GN=Acot2 PE=1 SV=2 - [ACOT2_MOUSE]                 | 44.59 | 1 | 7  | 14 | 61  | 0.721 | 1.309 | 1.000 | 1.369 | 207.50 | 44.59 | 25 | 61  | 453  | 49.6  | 7.36 |
| Q5DTW7-3 | Isoform 3 of Uncharacterized protein KIAA1551 OS=Mus musculus GN=Kiaa1551 - [K1551_MOUSE]                        | 2.76  | 5 | 3  | 3  | 5   | 4.686 | 2.113 | 1.018 | 1.369 | 4.56   | 2.76  | 3  | 5   | 1519 | 168.7 | 7.44 |
| P28230   | Gap junction beta-1 protein OS=Mus musculus GN=Gjb1 PE=1 SV=3 - [CXB1_MOUSE]                                     | 8.83  | 1 | 2  | 2  | 2   | 1.896 | 0.714 | 1.198 | 1.369 | 4.51   | 8.83  | 2  | 2   | 283  | 32.0  | 8.95 |
| Q3TW96   | UDP-N-acetylhexosamine pyrophosphorylase-like protein 1 OS=Mus musculus GN=Uap11 PE=2 SV=1 - [UAP11_MOUSE]       | 31.56 | 2 | 14 | 15 | 54  | 0.928 | 1.435 | 1.049 | 1.369 | 159.27 | 31.56 | 28 | 54  | 507  | 56.6  | 5.43 |
| D3YZ54   | 2-hydroxycyl-CoA lyase 1 OS=Mus musculus GN=Hac1 PE=2 SV=2 - [D3YZ54_MOUSE]                                      | 21.84 | 7 | 9  | 9  | 19  | 1.484 | 0.926 | 0.984 | 1.370 | 54.05  | 21.84 | 14 | 19  | 554  | 61.0  | 6.18 |
| Q9QYC7   | Vitamin K-dependent gamma-carboxylase OS=Mus musculus GN=Ggoc PE=2 SV=1 - [VKGC_MOUSE]                           | 3.70  | 1 | 2  | 3  | 4   | 1.985 | 1.192 | 1.417 | 1.370 | 4.24   | 3.70  | 3  | 4   | 757  | 87.1  | 8.02 |
| Q8CI78   | Required for meiotic nuclear division protein 1 homolog OS=Mus musculus GN=Rmnd1 PE=2 SV=1 - [RMN D1_MOUSE]      | 13.11 | 2 | 6  | 6  | 20  | 1.058 | 1.259 | 1.101 | 1.370 | 49.96  | 13.11 | 10 | 20  | 450  | 51.8  | 7.99 |
| Q9QXV0   | ProSAAS OS=Mus musculus GN=Pcsk1n PE=1 SV=2 - [PCSK1_MOUSE]                                                      | 43.02 | 1 | 9  | 9  | 122 | 1.734 | 0.819 | 1.007 | 1.370 | 364.12 | 43.02 | 16 | 122 | 258  | 27.3  | 5.85 |
| Q9CQX2   | Cytochrome b5 type B OS=Mus musculus GN=Cybsb PE=1 SV=1 - [CYBSB_MOUSE]                                          | 32.19 | 1 | 5  | 5  | 27  | 1.873 | 2.102 | 1.833 | 1.370 | 81.04  | 32.19 | 9  | 27  | 146  | 16.3  | 4.89 |
| Q9EQF5   | Dihydropyrimidinase OS=Mus musculus GN=Dpys PE=2 SV=2 - [DPYS_MOUSE]                                             | 10.60 | 1 | 4  | 4  | 15  | 0.738 | 1.700 | 0.893 | 1.370 | 35.05  | 10.60 | 6  | 15  | 519  | 56.7  | 7.20 |
| F7BA29   | Glutamate receptor ionotropic, NMDA 3B (Fragment) OS=Mus musculus GN=Grin3b PE=4 SV=1 - [GRIN3B_MOUSE]           | 2.77  | 2 | 1  | 1  | 1   | 1.134 | 1.190 | 1.365 | 1.370 | 1.65   | 2.77  | 1  | 1   | 542  | 60.2  | 8.44 |
| Q9DB72   | BTB/POZ domain-containing protein 17 OS=Mus musculus GN=Btb17 PE=2 SV=1 - [BTB17_MOUSE]                          | 25.52 | 2 | 11 | 12 | 52  | 0.542 | 0.803 | 1.054 | 1.370 | 147.49 | 25.52 | 23 | 52  | 478  | 52.6  | 9.42 |

|          |                                                                                                                          |       |   |    |    |     |       |       |       |       |         |       |    |     |      |       |       |
|----------|--------------------------------------------------------------------------------------------------------------------------|-------|---|----|----|-----|-------|-------|-------|-------|---------|-------|----|-----|------|-------|-------|
| Q9JK42   | [Pyruvate dehydrogenase [lipoamide]] kinase isozyme 2, mitochondrial OS=Mus musculus GN=Pdk2 PE=1 SV=2 - [PDK2_MOUSE]    | 44.47 | 1 | 11 | 15 | 64  | 0.696 | 1.421 | 1.293 | 1.370 | 172.08  | 44.47 | 24 | 64  | 407  | 46.0  | 6.61  |
| D3YWC7   | MCG15626, isoform CRA_b OS=Mus musculus GN=Fam47e PE=4 SV=2 - [D3YWC7_MOUSE]                                             | 2.99  | 1 | 1  | 1  | 1   | 1.511 | 1.216 | 1.119 | 1.370 | 1.82    | 2.99  | 1  | 1   | 402  | 46.4  | 9.38  |
| Q9JLJ0   | Lipopolysaccharide-induced tumor necrosis factor-alpha factor homolog OS=Mus musculus GN=Litaf PE=1 SV=1 - [LITAF_MOUSE] | 4.35  | 1 | 1  | 1  | 4   | 0.757 | 0.287 | 1.203 | 1.370 | 8.87    | 4.35  | 2  | 4   | 161  | 16.9  | 5.88  |
| D3YX47   | MCG20932 OS=Mus musculus GN=Rpl21-ps6 PE=4 SV=1 - [D3YX47_MOUSE]                                                         | 38.06 | 1 | 1  | 6  | 13  | 0.906 | 1.861 | 1.132 | 1.371 | 30.44   | 38.06 | 8  | 13  | 155  | 18.0  | 10.43 |
| P42232   | Signal transducer and activator of transcription 5B OS=Mus musculus GN=Stat5b PE=1 SV=1 - [STAT5B_MOUSE]                 | 24.05 | 1 | 3  | 16 | 35  | 1.204 | 0.586 | 0.670 | 1.371 | 103.48  | 24.05 | 23 | 35  | 786  | 89.9  | 6.05  |
| Q63912   | Oligodendrocyte-myelin glycoprotein OS=Mus musculus GN=Omg PE=1 SV=1 - [OMGP_MOUSE]                                      | 32.73 | 2 | 17 | 17 | 225 | 1.315 | 1.326 | 1.513 | 1.372 | 474.47  | 32.73 | 31 | 225 | 440  | 49.3  | 8.41  |
| Q3TKY6   | Peptidyl-prolyl cis-trans isomerase CWC27 homolog OS=Mus musculus GN=Cwc27 PE=1 SV=1 - [CWC27_MOUSE]                     | 6.40  | 1 | 3  | 3  | 3   | 0.669 | 1.308 | 1.351 | 1.372 | 8.63    | 6.40  | 3  | 3   | 469  | 53.5  | 5.53  |
| Q8BGV0   | Probable asparagine-tRNA ligase, mitochondrial OS=Mus musculus GN=Nars2 PE=2 SV=1 - [SYNM_MOUSE]                         | 6.92  | 2 | 4  | 4  | 11  | 0.564 | 1.010 | 1.229 | 1.373 | 22.41   | 6.92  | 7  | 11  | 477  | 53.9  | 7.36  |
| B1AVV7   | Kinesin-like protein KIF16B OS=Mus musculus GN=Kif16b PE=1 SV=1 - [KIF16B_MOUSE]                                         | 4.34  | 1 | 3  | 6  | 13  | 1.735 | 0.999 | 1.430 | 1.373 | 32.52   | 4.34  | 8  | 13  | 1312 | 150.0 | 6.44  |
| Q9D172   | ES1 protein homolog, mitochondrial OS=Mus musculus GN=D10Jhu81e PE=1 SV=1 - [D10JHU81E_MOUSE]                            | 58.27 | 1 | 11 | 11 | 87  | 1.483 | 1.212 | 1.233 | 1.373 | 259.56  | 58.27 | 20 | 87  | 266  | 28.1  | 8.78  |
| Q69ZF7   | Metal transporter CNNM4 OS=Mus musculus GN=Cnnm4 PE=1 SV=2 - [CNNM4_MOUSE]                                               | 8.43  | 1 | 2  | 7  | 19  | 0.735 | 0.704 | 0.987 | 1.373 | 42.75   | 8.43  | 11 | 19  | 771  | 86.6  | 6.07  |
| D3Z7J7   | Deoxyhypusine hydroxylase (Fragment) OS=Mus musculus GN=Dohn PE=2 SV=1 - [D3Z7J7_MOUSE]                                  | 10.64 | 4 | 1  | 1  | 2   | 2.472 | 1.456 | 1.447 | 1.373 | 4.47    | 10.64 | 2  | 2   | 188  | 20.5  | 4.94  |
| Q8BI08   | Protein MAL2 OS=Mus musculus GN=Mal2 PE=1 SV=1 - [MAL2_MOUSE]                                                            | 6.29  | 1 | 1  | 1  | 7   | 0.316 | 1.844 | 1.484 | 1.373 | 20.13   | 6.29  | 2  | 7   | 175  | 19.1  | 6.49  |
| E9Q9M2   | Cyclin-dependent kinase 14 (Fragment) OS=Mus musculus GN=Cdk14 PE=2 SV=1 - [E9Q9M2_MOUSE]                                | 26.19 | 3 | 1  | 3  | 4   | 2.264 | 1.370 | 1.739 | 1.373 | 10.22   | 26.19 | 4  | 4   | 168  | 18.6  | 9.50  |
| O08573-2 | Isoform Short of Galectin-9 OS=Mus musculus GN=Lgals9 - [LEG9_MOUSE]                                                     | 13.98 | 4 | 4  | 4  | 10  | 1.061 | 0.855 | 0.824 | 1.375 | 33.84   | 13.98 | 6  | 10  | 322  | 36.5  | 8.69  |
| Q8CBH5-2 | Isoform 2 of Major facilitator superfamily domain-containing protein 6 OS=Mus musculus GN=Mfsd6 - [MFS6_MOUSE]           | 5.81  | 3 | 3  | 6  | 31  | 0.722 | 0.902 | 1.146 | 1.375 | 86.43   | 5.81  | 10 | 31  | 774  | 85.7  | 5.72  |
| A6PWA4   | Protein Gm13023 (Fragment) OS=Mus musculus GN=Gm13023 PE=2 SV=1 - [GM13023_MOUSE]                                        | 6.62  | 2 | 1  | 1  | 1   | 0.824 | 0.638 | 1.497 | 1.375 | 0.00    | 6.62  | 1  | 1   | 151  | 17.6  | 7.74  |
| Q70KF4   | Cardiomyopathy-associated protein 5 OS=Mus musculus GN=Cmya5 PE=1 SV=2 - [CMYA5_MOUSE]                                   | 0.78  | 2 | 2  | 2  | 2   | 1.975 | 1.149 | 1.178 | 1.376 | 6.02    | 0.78  | 2  | 2   | 379  | 412.8 | 4.75  |
| P27601   | Guanine nucleotide-binding protein subunit alpha-13 OS=Mus musculus GN=Gna13 PE=1 SV=1 - [GNA13_MOUSE]                   | 45.89 | 4 | 14 | 16 | 168 | 0.643 | 0.907 | 0.940 | 1.377 | 439.52  | 45.89 | 32 | 168 | 377  | 44.0  | 8.21  |
| Q8K3P5   | CCR4-NOT transcription complex subunit 6 OS=Mus musculus GN=Cnot6 PE=1 SV=2 - [CNOT6_MOUSE]                              | 3.59  | 3 | 2  | 2  | 2   | 1.491 | 1.067 | 1.084 | 1.377 | 1.73    | 3.59  | 2  | 2   | 557  | 63.3  | 7.01  |
| G3UXL2   | Ribose-phosphate pyrophosphokinase OS=Mus musculus GN=Prps113 PE=2 SV=1 - [G3UXL2_MOUSE]                                 | 51.26 | 2 | 4  | 16 | 83  | 0.623 | 1.612 | 1.162 | 1.378 | 266.06  | 51.26 | 29 | 83  | 318  | 34.8  | 6.98  |
| P19246   | Neurofilament heavy polypeptide OS=Mus musculus GN=Nfhe PE=1 SV=3 - [NFH_MOUSE]                                          | 41.10 | 1 | 43 | 47 | 635 | 3.026 | 0.390 | 1.414 | 1.379 | 1870.73 | 41.10 | 79 | 635 | 1090 | 116.9 | 5.81  |
| Q9JIA1   | Leucine-rich glioma-inactivated protein 1 OS=Mus musculus GN=Lgi1 PE=1 SV=1 - [LGI1_MOUSE]                               | 40.04 | 2 | 23 | 23 | 136 | 0.616 | 1.344 | 1.421 | 1.379 | 385.52  | 40.04 | 41 | 136 | 557  | 63.6  | 8.02  |



|          |                                                                                                    |       |   |    |    |      |       |       |       |       |         |       |    |      |     |       |       |
|----------|----------------------------------------------------------------------------------------------------|-------|---|----|----|------|-------|-------|-------|-------|---------|-------|----|------|-----|-------|-------|
| Q02105   | Complement C1q subcomponent subunit C<br>OS=Mus musculus<br>GN=C1qc PE=2 SV=2 - [C1QC_MOUSE]       | 25.20 | 1 | 5  | 5  | 52   | 1.410 | 1.841 | 1.500 | 1.379 | 191.09  | 25.20 | 9  | 52   | 246 | 26.0  | 8.54  |
| P16330   | 2',3'-cyclic-nucleotide 3'-phosphodiesterase<br>OS=Mus musculus<br>GN=Cnp PE=1 SV=3 - [CN37_MOUSE] | 84.29 | 4 | 45 | 47 | 1328 | 0.945 | 0.295 | 1.214 | 1.379 | 3614.91 | 84.29 | 82 | 1328 | 420 | 47.1  | 8.97  |
| P03921   | NADH-ubiquinone oxidoreductase chain 5<br>OS=Mus musculus<br>GN=Mtd5 PE=3 SV=2 - [NUSM_MOUSE]      | 7.41  | 3 | 4  | 4  | 12   | 0.648 | 1.117 | 1.262 | 1.381 | 30.84   | 7.41  | 8  | 12   | 607 | 68.4  | 9.03  |
| Q8BY89-2 | Isoform 2 of Choline transporter-like protein 2<br>OS=Mus musculus<br>GN=Slc44a2 -                 | 18.18 | 2 | 12 | 13 | 58   | 0.580 | 1.293 | 1.228 | 1.381 | 142.91  | 18.18 | 23 | 58   | 704 | 79.9  | 8.66  |
| E0CZ04   | Gamma-glutamylaminocyclotransferase (Fragment) OS=Mus musculus GN=Ggact PE=2 SV=1 - [E0CZ04_MOUSE] | 54.29 | 5 | 3  | 3  | 7    | 1.685 | 1.194 | 0.857 | 1.381 | 24.66   | 54.29 | 5  | 7    | 105 | 11.9  | 5.39  |
| P54830   | Tyrosine-protein phosphatase non-receptor type 5 OS=Mus musculus GN=Ptpn5 PE=2 SV=2 - [PTNS_MOUSE] | 32.90 | 4 | 14 | 14 | 47   | 0.788 | 1.249 | 1.909 | 1.382 | 118.72  | 32.90 | 23 | 47   | 541 | 60.8  | 5.20  |
| Q9QZ58-2 | Isoform 2 of SH2 domain-containing protein 3C<br>OS=Mus musculus<br>GN=Sh2d3c - [SH2D3_MOUSE]      | 11.82 | 3 | 7  | 7  | 20   | 1.042 | 1.083 | 1.340 | 1.382 | 65.74   | 11.82 | 12 | 20   | 702 | 77.4  | 8.15  |
| G3XA42   | MCG148135 OS=Mus musculus GN=Gm17227 PE=4 SV=1 - [G3XA42_MOUSE]                                    | 17.65 | 1 | 1  | 1  | 1    | 1.311 | 0.818 | 1.544 | 1.384 | 0.00    | 17.65 | 1  | 1    | 51  | 5.6   | 10.71 |
| Q8BTW9   | Serine/threonine-protein kinase PAK 4 OS=Mus musculus GN=Pak4 PE=1 SV=1 - [PAK4_MOUSE]             | 11.47 | 4 | 3  | 5  | 17   | 1.261 | 1.269 | 1.251 | 1.384 | 52.88   | 11.47 | 9  | 17   | 593 | 64.6  | 9.85  |
| O35239   | Tyrosine-protein phosphatase non-receptor type 9 OS=Mus musculus GN=Ptpn9 PE=2 SV=2 - [PTN9_MOUSE] | 21.59 | 1 | 11 | 12 | 43   | 0.560 | 1.351 | 1.222 | 1.385 | 135.38  | 21.59 | 22 | 43   | 593 | 67.9  | 8.10  |
| A2ALI5   | Adherens junction-associated protein 1 OS=Mus musculus GN=Ajapp1 PE=2 SV=1 - [AJAP1_MOUSE]         | 11.65 | 1 | 3  | 3  | 6    | 1.612 | 1.528 | 1.781 | 1.385 | 25.36   | 11.65 | 5  | 6    | 412 | 44.7  | 9.42  |
| B1AWT2   | Ras-related GTP binding D, isoform CRA_a OS=Mus musculus GN=Rragd PE=4 SV=1 - [B1AWT2_MOUSE]       | 13.53 | 4 | 3  | 5  | 14   | 0.686 | 2.228 | 1.929 | 1.386 | 43.32   | 13.53 | 10 | 14   | 399 | 45.1  | 4.92  |
| P54310   | Hormone-sensitive lipase OS=Mus musculus GN=Lipe PE=1 SV=2 - [LIPS_MOUSE]                          | 14.76 | 3 | 9  | 9  | 17   | 0.708 | 0.868 | 1.072 | 1.386 | 40.53   | 14.76 | 13 | 17   | 759 | 83.3  | 6.95  |
| Q8BTR5   | Dual specificity phosphatase 28 OS=Mus musculus GN=Dusp28 PE=1 SV=1 -                              | 24.54 | 1 | 2  | 2  | 14   | 1.333 | 1.019 | 1.146 | 1.387 | 45.99   | 24.54 | 4  | 14   | 163 | 17.5  | 7.75  |
| Q91W97   | Putative hexokinase HKDC1 OS=Mus musculus GN=Hkdc1 PE=2 SV=1 - [HKDC1_MOUSE]                       | 10.05 | 1 | 4  | 8  | 25   | 1.305 | 1.320 | 1.097 | 1.387 | 53.25   | 10.05 | 13 | 25   | 915 | 102.2 | 7.09  |
| Q9Z0P4   | Paralemmin-1 OS=Mus musculus GN=Paln PE=1 SV=1 - [PALM_MOUSE]                                      | 58.49 | 1 | 4  | 21 | 275  | 1.817 | 1.188 | 1.153 | 1.387 | 726.36  | 58.49 | 36 | 275  | 383 | 41.6  | 4.84  |
| O08917   | Flotillin-1 OS=Mus musculus GN=Flot1 PE=1 SV=1 - [FLOT1_MOUSE]                                     | 62.62 | 5 | 23 | 23 | 143  | 0.987 | 1.707 | 1.318 | 1.387 | 422.34  | 62.62 | 44 | 143  | 428 | 47.5  | 7.15  |
| P21619   | Lamin-B2 OS=Mus musculus GN=Lmb2 PE=1 SV=2 - [LMNB2_MOUSE]                                         | 55.20 | 2 | 26 | 31 | 185  | 1.302 | 1.296 | 1.482 | 1.387 | 611.86  | 55.20 | 56 | 185  | 596 | 67.3  | 5.50  |
| Q9WVD5   | Mitochondrial ornithine transporter 1 OS=Mus musculus GN=Slc25a15 PE=2 SV=1 -                      | 15.28 | 1 | 4  | 4  | 10   | 0.810 | 0.862 | 0.923 | 1.388 | 28.43   | 15.28 | 8  | 10   | 301 | 32.8  | 8.85  |
| Q8K0C1   | Importin-13 OS=Mus musculus GN=Ipo13 PE=2 SV=1 - [IPO13_MOUSE]                                     | 6.02  | 2 | 5  | 5  | 11   | 0.694 | 0.983 | 1.135 | 1.388 | 28.86   | 6.02  | 7  | 11   | 963 | 108.2 | 5.30  |
| Q80Z8-2  | Isoform 2 of Sperm-associated antigen 1 OS=Mus musculus GN=Spag1 -                                 | 26.84 | 3 | 12 | 12 | 24   | 1.881 | 0.852 | 1.260 | 1.389 | 65.11   | 26.84 | 21 | 24   | 529 | 58.5  | 5.78  |
| Q80SX0   | STAR-related lipid transfer protein 4 OS=Mus musculus GN=Stard4 PE=2 SV=1 -                        | 21.43 | 4 | 3  | 3  | 4    | 1.957 | 1.350 | 1.213 | 1.390 | 9.82    | 21.43 | 4  | 4    | 224 | 25.5  | 5.34  |
| Q9WUR9   | GTP:AMP phosphotransferase AK4, mitochondrial OS=Mus musculus GN=Ak4 PE=2 SV=1 - [KAD4_MOUSE]      | 57.40 | 4 | 10 | 10 | 77   | 1.005 | 2.145 | 1.162 | 1.390 | 199.85  | 57.40 | 19 | 77   | 223 | 25.0  | 7.53  |
| J3QPY0   | Protein 1600014C10RIK OS=Mus musculus GN=1600014C10RIK PE=4 SV=1 - [J3QPY0_MOUSE]                  | 61.82 | 1 | 1  | 2  | 6    | 0.699 | 1.006 | 1.186 | 1.391 | 15.11   | 61.82 | 3  | 6    | 55  | 5.6   | 8.98  |

|          |                                                                                                          |       |   |    |    |      |       |       |       |       |         |       |    |      |      |       |      |
|----------|----------------------------------------------------------------------------------------------------------|-------|---|----|----|------|-------|-------|-------|-------|---------|-------|----|------|------|-------|------|
| P00405   | Cytochrome c oxidase subunit 2 OS=Mus musculus GN=Mtco2 PE=1 SV=1 - [COX2_MOUSE]                         | 30.84 | 1 | 7  | 7  | 204  | 0.862 | 0.958 | 1.165 | 1.391 | 508.27  | 30.84 | 12 | 204  | 227  | 26.0  | 4.73 |
| Q9JLZ3   | Methylglutacetyl-CoA hydratase, mitochondrial OS=Mus musculus GN=Auh PE=2 SV=1 - [AUHM_MOUSE]            | 38.54 | 7 | 12 | 13 | 94   | 0.891 | 0.884 | 1.167 | 1.393 | 300.47  | 38.54 | 25 | 94   | 314  | 33.4  | 9.51 |
| Q8K298   | Actin-binding protein anillin OS=Mus musculus GN=Anln PE=1 SV=2 - [ANLN_MOUSE]                           | 14.72 | 1 | 16 | 16 | 52   | 1.708 | 0.379 | 1.819 | 1.393 | 146.11  | 14.72 | 29 | 52   | 1121 | 122.7 | 6.98 |
| Q6V595   | Kelch-like protein 6 OS=Mus musculus GN=Kih6 PE=2 SV=2 - [KLHL6_MOUSE]                                   | 3.72  | 1 | 1  | 2  | 2    | 1.459 | 1.241 | 1.433 | 1.393 | 6.22    | 3.72  | 2  | 2    | 619  | 70.1  | 6.34 |
| Q9R187   | Tumor necrosis factor receptor superfamily member EDAR OS=Mus musculus GN=Edar PE=1 SV=1 - [EDAR_MOUSE]  | 1.34  | 1 | 1  | 1  | 1    | 0.896 | 1.661 | 2.742 | 1.394 | 2.57    | 1.34  | 1  | 1    | 448  | 48.4  | 5.43 |
| Q921N6   | Probable ATP-dependent RNA helicase DDX27 OS=Mus musculus GN=Ddx27 PE=1 SV=3 - [DDX27_MOUSE]             | 2.63  | 1 | 2  | 2  | 3    | 2.986 | 1.357 | 1.207 | 1.394 | 3.99    | 2.63  | 3  | 3    | 760  | 85.9  | 9.25 |
| Q80VA0   | N-acetylgalactosaminyltransferase 7 OS=Mus musculus GN=Galt7 PE=2 SV=2 - [GALT7_MOUSE]                   | 3.81  | 3 | 2  | 2  | 2    | 0.656 | 0.214 | 1.699 | 1.394 | 0.00    | 3.81  | 2  | 2    | 657  | 75.4  | 7.93 |
| ABDUK4   | Beta-globin OS=Mus musculus GN=Hbb-b1 PE=2 SV=1 - [ABDUK4_MOUSE]                                         | 85.03 | 2 | 5  | 14 | 2661 | 3.594 | 0.374 | 0.447 | 1.395 | 8645.53 | 85.03 | 28 | 2661 | 147  | 15.7  | 7.69 |
| Q4KMS1   | Tripartite motif-containing 44 OS=Mus musculus GN=Trim44 PE=2 SV=1 - [Q4KMS1_MOUSE]                      | 12.75 | 3 | 2  | 2  | 4    | 1.986 | 1.663 | 1.631 | 1.395 | 12.89   | 12.75 | 3  | 4    | 345  | 38.1  | 4.18 |
| P01648   | Ig kappa chain V-V region HP 91A3 OS=Mus musculus PE=1 SV=1 - [KV5AF_MOUSE]                              | 23.15 | 7 | 1  | 2  | 4    | 3.555 | 2.872 | 0.762 | 1.395 | 10.55   | 23.15 | 4  | 4    | 108  | 12.0  | 8.47 |
| Q6TAC4   | Vomeroneasal type-2 receptor 26 OS=Mus musculus GN=Vmn2r26 PE=2 SV=2 - [Vmn2r26_MOUSE]                   | 2.34  | 1 | 2  | 2  | 2    | 1.755 | 2.363 | 1.134 | 1.395 | 2.30    | 2.34  | 2  | 2    | 855  | 96.1  | 7.68 |
| Q91ZB7   | Mas-related G-protein coupled receptor member E OS=Mus musculus GN=Mrgpre PE=2 SV=1 - [MRGRE_MOUSE]      | 3.87  | 1 | 1  | 1  | 1    | 4.354 | 1.219 | 1.016 | 1.396 | 2.67    | 3.87  | 1  | 1    | 310  | 34.6  | 6.68 |
| G5E8L5   | MCG140820 OS=Mus musculus GN=Zfp777 PE=4 SV=1 - [G5E8L5_MOUSE]                                           | 1.07  | 2 | 1  | 1  | 1    | 0.854 | 1.024 | 1.327 | 1.396 | 3.17    | 1.07  | 1  | 1    | 841  | 94.9  | 6.67 |
| D3Y46    | Calcium and integrin-binding protein 1 (Fragment) OS=Mus musculus GN=Cib1 PE=2 SV=1 - [D3Y46_MOUSE]      | 26.36 | 3 | 2  | 2  | 7    | 1.219 | 0.887 | 1.158 | 1.396 | 26.76   | 26.36 | 3  | 7    | 110  | 12.4  | 4.23 |
| Q61496   | Probable ATP-dependent RNA helicase DDX4 OS=Mus musculus GN=Ddx4 PE=1 SV=2 - [DDX4_MOUSE]                | 7.98  | 2 | 2  | 5  | 20   | 1.746 | 2.130 | 1.426 | 1.396 | 52.95   | 7.98  | 7  | 20   | 702  | 76.4  | 6.09 |
| A2AMZ4   | Uncharacterized protein C17orf89 homolog OS=Mus musculus PE=4 SV=1 - [CQ089_MOUSE]                       | 33.78 | 1 | 3  | 3  | 8    | 1.157 | 1.176 | 1.195 | 1.397 | 22.67   | 33.78 | 4  | 8    | 74   | 7.8   | 9.55 |
| P37804   | Transgelin OS=Mus musculus GN=Tagln PE=1 SV=3 - [TAGL_MOUSE]                                             | 76.62 | 1 | 14 | 15 | 115  | 0.853 | 3.715 | 0.926 | 1.397 | 329.45  | 76.62 | 28 | 115  | 201  | 22.6  | 8.81 |
| Q7TNV1-2 | Isoform 2 of Protein FAM57B OS=Mus musculus GN=Fam57b - [FAM57B_MOUSE]                                   | 4.44  | 3 | 1  | 1  | 2    | 1.052 | 0.708 | 1.020 | 1.398 | 1.61    | 4.44  | 1  | 2    | 225  | 25.4  | 8.72 |
| Q8CECS   | NF-kappa-B inhibitor-interacting Ras-like protein 1 OS=Mus musculus GN=Nkiras1 PE=2 SV=1 - [KBRS1_MOUSE] | 16.15 | 2 | 3  | 3  | 6    | 0.778 | 1.033 | 1.262 | 1.398 | 12.74   | 16.15 | 6  | 6    | 192  | 21.6  | 7.33 |
| Q8C729-2 | Isoform 2 of Protein FAM126B OS=Mus musculus GN=Fam126b - [F126B_MOUSE]                                  | 27.13 | 3 | 13 | 13 | 48   | 1.037 | 1.312 | 1.417 | 1.399 | 144.99  | 27.13 | 25 | 48   | 586  | 64.4  | 6.67 |
| O89019-2 | Isoform 2 of Inversin OS=Mus musculus GN=Invs - [INVS_MOUSE]                                             | 3.46  | 8 | 2  | 3  | 6    | 2.572 | 1.227 | 1.067 | 1.399 | 8.67    | 3.46  | 3  | 6    | 897  | 99.6  | 9.07 |
| Q71R19-2 | Isoform 2 of Kynurenine-oxoglutarate transaminase 3 OS=Mus musculus GN=Ccb12 - [KAT3_MOUSE]              | 30.24 | 3 | 10 | 11 | 33   | 1.268 | 1.209 | 1.158 | 1.399 | 97.92   | 30.24 | 16 | 33   | 420  | 47.3  | 7.20 |
| Q3U0B3   | Dehydrogenase/reductase SDR family member 11 OS=Mus musculus GN=Dhrs11 PE=2 SV=1 - [DHR11_MOUSE]         | 16.92 | 2 | 4  | 4  | 10   | 1.329 | 1.619 | 0.997 | 1.399 | 31.08   | 16.92 | 8  | 10   | 260  | 28.3  | 6.34 |
| Q922R8   | Protein disulfide-isomerase A6 OS=Mus musculus GN=Pdia6 PE=1 SV=3 - [PDIA6_MOUSE]                        | 40.68 | 1 | 1  | 15 | 68   | 0.739 | 2.555 | 0.340 | 1.399 | 203.03  | 40.68 | 24 | 68   | 440  | 48.1  | 5.14 |
| P52963   | Band 4.1-like protein 4A OS=Mus musculus GN=Epb41a PE=2 SV=2 - [E41LA_MOUSE]                             | 5.83  | 1 | 3  | 3  | 4    | 1.303 | 0.663 | 1.444 | 1.400 | 9.08    | 5.83  | 4  | 4    | 686  | 78.5  | 9.44 |

|          |                                                                                                      |       |   |    |    |      |       |       |       |       |         |       |    |      |      |       |       |
|----------|------------------------------------------------------------------------------------------------------|-------|---|----|----|------|-------|-------|-------|-------|---------|-------|----|------|------|-------|-------|
| Q60634   | Flotillin-2 OS=Mus musculus GN=Flot2 PE=1 SV=2 - [FLOT2_MOUSE]                                       | 68.93 | 4 | 30 | 30 | 128  | 0.920 | 1.720 | 1.251 | 1.400 | 364.38  | 68.93 | 53 | 128  | 428  | 47.0  | 5.20  |
| Q80T14   | Extracellular matrix protein FRAS1 OS=Mus musculus GN=Fras1 PE=2 SV=2 - [FRAS1_MOUSE]                | 1.25  | 1 | 3  | 5  | 13   | 1.417 | 1.323 | 1.012 | 1.400 | 30.32   | 1.25  | 6  | 13   | 4010 | 442.1 | 5.82  |
| Q99JG2   | Endothelin B receptor-like protein 2 OS=Mus musculus GN=Gpr3711 PE=1 SV=2 -                          | 8.94  | 1 | 4  | 4  | 22   | 0.574 | 0.822 | 1.192 | 1.401 | 53.70   | 8.94  | 7  | 22   | 481  | 52.7  | 7.36  |
| Q8K1N4   | Spermatogenesis-associated serine-rich protein 2 OS=Mus musculus GN=Spats2 PE=1 SV=1 -               | 4.04  | 2 | 2  | 2  | 2    | 2.797 | 1.581 | 1.104 | 1.401 | 6.28    | 4.04  | 2  | 2    | 545  | 58.9  | 9.00  |
| Q3UQA7   | Selenoprotein H OS=Mus musculus GN=Selh PE=2 SV=2 - [SELH_MOUSE]                                     | 17.24 | 1 | 2  | 2  | 4    | 1.657 | 1.503 | 1.025 | 1.402 | 12.84   | 17.24 | 3  | 4    | 116  | 13.0  | 9.80  |
| Q9ESU7   | Neutral amino acid transporter ASCT2 OS=Mus musculus GN=Slc1a5 PE=2 SV=1 - [Q9ESU7_MOUSE]            | 11.35 | 3 | 3  | 3  | 7    | 0.768 | 0.932 | 0.945 | 1.402 | 19.38   | 11.35 | 5  | 7    | 555  | 58.4  | 7.12  |
| A7M7S2   | Nitrogen permease regulator 3-like protein OS=Mus musculus GN=Npr13 PE=2 SV=1 - [A7M7S2_MOUSE]       | 6.43  | 2 | 3  | 3  | 5    | 1.657 | 0.947 | 1.123 | 1.402 | 11.34   | 6.43  | 5  | 5    | 544  | 60.8  | 6.83  |
| Q99JX1   | Transcription initiation factor TFIIID subunit 11 OS=Mus musculus GN=Taf11 PE=2 SV=1 - [TAF11_MOUSE] | 5.21  | 1 | 1  | 1  | 2    | 1.742 | 0.876 | 1.317 | 1.403 | 3.74    | 5.21  | 2  | 2    | 211  | 23.3  | 5.24  |
| P35505   | Fumarylacetoacetase OS=Mus musculus GN=Fah PE=1 SV=2 - [FAAH_MOUSE]                                  | 42.24 | 2 | 12 | 12 | 57   | 2.842 | 1.169 | 1.154 | 1.403 | 193.57  | 42.24 | 20 | 57   | 419  | 46.1  | 7.18  |
| F6QDU1   | Uncharacterized protein OS=Mus musculus GN=Rpl28-ps4 PE=4 SV=1 - [F6QDU1_MOUSE]                      | 8.40  | 1 | 1  | 1  | 1    | 0.958 | 1.230 | 1.614 | 1.404 | 2.35    | 8.40  | 1  | 1    | 131  | 15.2  | 11.05 |
| Q8BG16   | Sodium-dependent neutral amino acid transporter B(0)AT2 OS=Mus musculus GN=Slc6a15 PE=1 SV=1 -       | 7.82  | 1 | 4  | 4  | 4    | 1.720 | 1.383 | 1.816 | 1.404 | 12.53   | 7.82  | 4  | 4    | 729  | 81.7  | 5.19  |
| P52480-2 | Isoform M1 of Pyruvate kinase PKM OS=Mus musculus GN=Pkm - [KPYM_MOUSE]                              | 80.60 | 1 | 3  | 46 | 1956 | 1.654 | 1.098 | 1.168 | 1.404 | 5864.96 | 80.60 | 85 | 1956 | 531  | 57.9  | 7.14  |
| O35226   | 26S proteasome non-ATPase regulatory subunit 4 OS=Mus musculus GN=Psmo4 PE=1 SV=1 - [PSMD4_MOUSE]    | 31.91 | 2 | 1  | 10 | 85   | 0.707 | 1.046 | 1.469 | 1.406 | 268.63  | 31.91 | 19 | 85   | 376  | 40.7  | 4.79  |
| Q9DB16   | Calcium-binding protein 39 like OS=Mus musculus GN=Cab39l PE=1 SV=3 - [CB39L_MOUSE]                  | 14.24 | 2 | 2  | 5  | 20   | 0.701 | 1.421 | 0.944 | 1.406 | 46.35   | 14.24 | 9  | 20   | 337  | 39.1  | 8.31  |
| J3QNE4   | Protein E23008N13Rik OS=Mus musculus GN=E23008N13Rik PE=4 SV=1 - [J3QNE4_MOUSE]                      | 3.43  | 3 | 2  | 6  | 13   | 0.889 | 1.372 | 1.352 | 1.407 | 25.98   | 3.43  | 7  | 13   | 1664 | 195.7 | 5.31  |
| Q9CS42   | Ribose-phosphate pyrophosphokinase 2 OS=Mus musculus GN=Prps2 PE=1 SV=4 - [PRPS2_MOUSE]              | 43.08 | 1 | 6  | 14 | 50   | 0.869 | 1.081 | 1.119 | 1.407 | 164.31  | 43.08 | 24 | 50   | 318  | 34.8  | 6.61  |
| Q9J1Z2   | Tubulin alpha-8 chain OS=Mus musculus GN=Tuba8 PE=1 SV=1 - [TBA8_MOUSE]                              | 50.33 | 1 | 6  | 22 | 2388 | 1.147 | 1.546 | 1.892 | 1.407 | 7485.50 | 50.33 | 42 | 2388 | 449  | 50.0  | 5.10  |
| E9Q152   | Protein Als2cr11 OS=Mus musculus GN=Als2cr11 PE=2 SV=1 - [E9Q152_MOUSE]                              | 2.15  | 1 | 1  | 1  | 2    | 2.431 | 0.931 | 0.569 | 1.407 | 4.58    | 2.15  | 1  | 2    | 557  | 63.1  | 8.87  |
| Q3USB7   | Inactive phospholipase C-like protein 1 OS=Mus musculus GN=Plcl1 PE=1 SV=3 - [PLCL1_MOUSE]           | 31.57 | 1 | 29 | 30 | 115  | 0.993 | 0.645 | 1.217 | 1.407 | 366.03  | 31.57 | 51 | 115  | 1096 | 122.6 | 5.64  |
| Q9D500   | Protein 493053L02Rik OS=Mus musculus GN=493053L02Rik PE=2 SV=1 - [Q9D500_MOUSE]                      | 12.90 | 1 | 1  | 1  | 5    | 2.323 | 1.678 | 1.561 | 1.407 | 10.20   | 12.90 | 1  | 5    | 124  | 14.0  | 9.66  |
| D3Z090   | Macrophage colony-stimulating factor 1 (Fragment) OS=Mus musculus GN=Csf1 PE=2 SV=1 - [D3Z090_MOUSE] | 7.69  | 3 | 1  | 1  | 2    | 1.891 | 0.742 | 1.614 | 1.408 | 6.47    | 7.69  | 2  | 2    | 182  | 21.3  | 7.25  |
| P68404   | Protein kinase C beta type OS=Mus musculus GN=Prkcb PE=1 SV=4 - [KPCB_MOUSE]                         | 41.73 | 1 | 2  | 28 | 140  | 0.543 | 0.252 | 0.969 | 1.409 | 378.82  | 41.73 | 49 | 140  | 671  | 76.7  | 7.01  |
| Q8K1K4   | Centromere protein I OS=Mus musculus GN=Cenpi PE=2 SV=1 - [CENPI_MOUSE]                              | 3.35  | 1 | 1  | 1  | 6    | 0.857 | 0.928 | 0.854 | 1.409 | 0.00    | 3.35  | 1  | 6    | 746  | 85.3  | 8.05  |
| Q9CPS6   | Histidine triad nucleotide-binding protein 3 OS=Mus musculus GN=Hint3 PE=2 SV=1 - [HINT3_MOUSE]      | 24.24 | 3 | 4  | 4  | 17   | 0.912 | 1.078 | 1.103 | 1.409 | 42.62   | 24.24 | 7  | 17   | 165  | 18.8  | 6.33  |
| Q7TMA2   | Zinc finger protein 503 OS=Mus musculus GN=Znf503 PE=2 SV=1 - [ZN503_MOUSE]                          | 5.67  | 2 | 2  | 3  | 5    | 3.969 | 2.607 | 1.154 | 1.410 | 18.48   | 5.67  | 4  | 5    | 652  | 63.0  | 8.66  |

|          |                                                                                                                      |       |    |    |    |     |       |       |       |       |        |       |    |     |      |       |      |
|----------|----------------------------------------------------------------------------------------------------------------------|-------|----|----|----|-----|-------|-------|-------|-------|--------|-------|----|-----|------|-------|------|
| A2AHQ7   | Phosphorylase b kinase regulatory subunit alpha, liver isoform OS=Mus musculus GN=Pka2 PE=2 SV=1 - [A2AHQ7_MOUSE]    | 3.44  | 3  | 3  | 4  | 16  | 1.000 | 1.109 | 1.165 | 1.411 | 42.47  | 3.44  | 6  | 16  | 1191 | 133.7 | 6.40 |
| E9Q166   | Protein Atad2b OS=Mus musculus GN=Atad2b PE=2 SV=1 - [E9Q166_MOUSE]                                                  | 2.40  | 1  | 2  | 3  | 3   | 0.899 | 0.936 | 1.430 | 1.412 | 4.70   | 2.40  | 3  | 3   | 1460 | 164.6 | 6.96 |
| Q91VH2   | Sorting nexin-9 OS=Mus musculus GN=Snx9 PE=1 SV=1 - [SNX9_MOUSE]                                                     | 7.73  | 1  | 5  | 5  | 7   | 0.698 | 1.354 | 1.163 | 1.412 | 18.53  | 7.73  | 7  | 7   | 595  | 66.5  | 5.52 |
| P20934   | Protein EVI2A OS=Mus musculus GN=Evi2a PE=1 SV=2 - [EVI2A_MOUSE]                                                     | 11.66 | 1  | 2  | 2  | 9   | 0.954 | 0.274 | 1.357 | 1.414 | 25.11  | 11.66 | 4  | 9   | 223  | 24.1  | 9.52 |
| Q3UHN9   | Bifunctional heparan sulfate N-deacetylase/N-sulfotransferase 1 OS=Mus musculus GN=Ndst1 PE=1 SV=2 - [NDST1_MOUSE]   | 5.56  | 2  | 3  | 4  | 6   | 1.051 | 0.700 | 1.871 | 1.414 | 13.00  | 5.56  | 5  | 6   | 882  | 100.7 | 7.77 |
| Q8CDI2   | F-box only protein 43 OS=Mus musculus GN=Fbxo43 PE=1 SV=2 - [FBX43_MOUSE]                                            | 4.06  | 2  | 2  | 2  | 3   | 1.073 | 0.898 | 1.330 | 1.415 | 6.05   | 4.06  | 2  | 3   | 640  | 71.1  | 8.16 |
| Q8QZS1   | 3-hydroxyisobutyryl-CoA hydrolase, mitochondrial OS=Mus musculus GN=Hibch PE=1 SV=1 - [HIBCH_MOUSE]                  | 49.09 | 2  | 16 | 16 | 77  | 0.841 | 1.127 | 1.026 | 1.415 | 226.43 | 49.09 | 31 | 77  | 385  | 43.0  | 8.06 |
| Q52KR3   | Protein prune homolog 2 OS=Mus musculus GN=Prune2 PE=2 SV=2 - [PRUN2_MOUSE]                                          | 6.65  | 4  | 2  | 14 | 47  | 1.300 | 1.642 | 1.445 | 1.415 | 139.60 | 6.65  | 21 | 47  | 3084 | 339.3 | 4.46 |
| Q60928   | Gamma-glutamyltranspeptidase 1 OS=Mus musculus GN=Ggt1 PE=1 SV=1 - [GGT1_MOUSE]                                      | 4.23  | 8  | 2  | 2  | 4   | 1.354 | 1.117 | 1.252 | 1.415 | 14.49  | 4.23  | 3  | 4   | 568  | 61.5  | 7.15 |
| Q8BL80   | Rho GTPase-activating protein 22 OS=Mus musculus GN=Arhgap22 PE=1 SV=2 - [ARHAP22_MOUSE]                             | 8.12  | 4  | 4  | 5  | 13  | 0.575 | 1.386 | 0.973 | 1.416 | 30.92  | 8.12  | 7  | 13  | 702  | 77.7  | 7.88 |
| Q9QUP5   | Hyaluronan and proteoglycan link protein 1 OS=Mus musculus GN=Hapln1 PE=2 SV=1 - [HPLN1_MOUSE]                       | 47.47 | 1  | 13 | 14 | 82  | 1.543 | 1.872 | 2.289 | 1.417 | 217.91 | 47.47 | 24 | 82  | 356  | 40.5  | 7.80 |
| Q3UR70   | Transforming growth factor-beta receptor-associated protein 1 OS=Mus musculus GN=Tgfbra1 PE=2 SV=1 - [TGFBRA1_MOUSE] | 11.40 | 1  | 4  | 7  | 19  | 0.851 | 0.596 | 1.134 | 1.417 | 53.47  | 11.40 | 14 | 19  | 860  | 97.2  | 6.70 |
| P70174   | Histamine H1 receptor OS=Mus musculus GN=Hrh1 PE=2 SV=2 - [HRH1_MOUSE]                                               | 14.14 | 1  | 6  | 6  | 12  | 1.125 | 1.217 | 1.106 | 1.417 | 35.29  | 14.14 | 9  | 12  | 488  | 55.6  | 9.32 |
| Q3URU2-2 | Isoform 2 of paternally-expressed gene 3 protein OS=Mus musculus GN=Peg3 - [PEG3_MOUSE]                              | 8.12  | 1  | 1  | 8  | 15  | 1.164 | 1.185 | 1.253 | 1.418 | 32.12  | 8.12  | 11 | 15  | 1194 | 136.9 | 7.17 |
| G3X8P9   | Aldehyde oxidase OS=Mus musculus GN=Aox1 PE=4 SV=1 - [G3X8P9_MOUSE]                                                  | 3.90  | 2  | 5  | 6  | 10  | 2.146 | 1.918 | 1.082 | 1.418 | 26.20  | 3.90  | 10 | 10  | 1333 | 146.6 | 6.93 |
| P48320   | Glutamate decarboxylase 2 OS=Mus musculus GN=Gad2 PE=2 SV=1 - [DCE2_MOUSE]                                           | 43.25 | 1  | 19 | 21 | 181 | 0.569 | 0.884 | 1.038 | 1.419 | 580.86 | 43.25 | 38 | 181 | 585  | 65.2  | 6.90 |
| F6T596   | Transducin-like enhancer protein 3 (Fragment) OS=Mus musculus GN=Tie3 PE=2 SV=1 - [F6T596_MOUSE]                     | 9.69  | 14 | 5  | 5  | 8   | 1.552 | 0.956 | 1.263 | 1.420 | 17.93  | 9.69  | 8  | 8   | 702  | 75.3  | 7.23 |
| Q9DD02-2 | Isoform 2 of Protein Hikeshi OS=Mus musculus GN=L7m6 - [HIKES_MOUSE]                                                 | 15.82 | 3  | 2  | 2  | 9   | 0.938 | 1.131 | 1.305 | 1.420 | 25.22  | 15.82 | 4  | 9   | 158  | 17.2  | 7.24 |
| Q8CJF9   | Protein argonaute-3 OS=Mus musculus GN=Ago3 PE=2 SV=2 - [AGO3_MOUSE]                                                 | 20.23 | 1  | 5  | 15 | 39  | 2.587 | 0.509 | 1.428 | 1.421 | 106.94 | 20.23 | 24 | 39  | 860  | 97.2  | 9.10 |
| P14602   | Heat shock protein beta-1 OS=Mus musculus GN=Hspb1 PE=1 SV=3 - [HSPB1_MOUSE]                                         | 61.72 | 4  | 9  | 9  | 35  | 2.000 | 2.039 | 1.144 | 1.421 | 108.80 | 61.72 | 16 | 35  | 209  | 23.0  | 6.55 |
| Q8VE95   | UPF0598 protein C8orf82 homolog OS=Mus musculus PE=2 SV=1 - [CH082_MOUSE]                                            | 35.78 | 1  | 6  | 6  | 18  | 1.270 | 0.995 | 1.027 | 1.421 | 40.18  | 35.78 | 11 | 18  | 218  | 24.3  | 8.70 |
| B2KGD7   | Importin-8 (Fragment) OS=Mus musculus GN=Ipo8 PE=2 SV=1 - [B2KGD7_MOUSE]                                             | 9.97  | 3  | 2  | 3  | 6   | 0.932 | 0.977 | 0.919 | 1.421 | 11.30  | 9.97  | 5  | 6   | 361  | 42.5  | 5.91 |
| P97478   | Ubiquinone biosynthesis protein COQ7 homolog OS=Mus musculus GN=Coq7 PE=2 SV=3 - [COQ7_MOUSE]                        | 27.19 | 2  | 5  | 5  | 16  | 0.546 | 1.930 | 1.289 | 1.422 | 54.83  | 27.19 | 10 | 16  | 217  | 24.0  | 7.17 |
| Q9ERE2   | Keratin, type II cuticular Hb1 (Fragment) OS=Mus musculus GN=Krt81 PE=2 SV=1 - [KRT81_MOUSE]                         | 4.10  | 4  | 1  | 2  | 17  | 6.802 | 0.598 | 1.832 | 1.422 | 37.01  | 4.10  | 4  | 17  | 390  | 43.7  | 5.20 |
| A2AIT6   | Alpha-tocopherol transfer protein OS=Mus musculus GN=Ttpa PE=2 SV=2 - [A2AIT6_MOUSE]                                 | 7.63  | 2  | 1  | 1  | 4   | 1.311 | 1.216 | 1.195 | 1.423 | 20.53  | 7.63  | 2  | 4   | 262  | 29.8  | 9.67 |

|          |                                                                                                                     |       |   |    |    |      |        |       |       |       |         |       |    |      |      |       |       |
|----------|---------------------------------------------------------------------------------------------------------------------|-------|---|----|----|------|--------|-------|-------|-------|---------|-------|----|------|------|-------|-------|
| A6H630   | UPF0364 protein C6orf211 homolog OS=Mus musculus PE=2 SV=1 - [CF211_MOUSE]                                          | 29.38 | 5 | 12 | 12 | 30   | 0.880  | 1.342 | 1.579 | 1.423 | 82.53   | 29.38 | 19 | 30   | 439  | 50.5  | 5.92  |
| Q9Z2R6   | Protein unc-119 homolog A OS=Mus musculus GN=Unc119 PE=1 SV=1 - [U119A_MOUSE]                                       | 39.17 | 2 | 1  | 7  | 26   | 1.746  | 1.248 | 1.589 | 1.423 | 77.42   | 39.17 | 11 | 26   | 240  | 27.0  | 6.15  |
| Q8BX57-3 | Isoform 3 of PX domain-containing protein kinase-like protein OS=Mus musculus GN=Ppk - [Ppk_MOUSE]                  | 4.91  | 3 | 2  | 2  | 3    | 0.750  | 0.897 | 0.940 | 1.424 | 10.02   | 4.91  | 3  | 3    | 448  | 50.9  | 8.79  |
| Q3TH73-2 | Isoform 2 of Protein tweety homolog 2 OS=Mus musculus GN=Ttyh2 - [Ttyh2_MOUSE]                                      | 5.32  | 2 | 3  | 3  | 12   | 0.835  | 0.565 | 0.937 | 1.424 | 39.14   | 5.32  | 6  | 12   | 470  | 52.1  | 6.51  |
| P39061-2 | Isoform 3 of Collagen alpha-1(XVIII) chain OS=Mus musculus GN=Col18a1 - [Col18a1_MOUSE]                             | 10.11 | 4 | 11 | 11 | 30   | 0.880  | 2.573 | 0.918 | 1.424 | 83.69   | 10.11 | 20 | 30   | 1315 | 134.1 | 6.00  |
| Q91V93   | Rho-related BTB domain-containing protein 2 OS=Mus musculus GN=Rhobtb2 PE=2 SV=2 - [RHBT2_MOUSE]                    | 7.69  | 1 | 4  | 4  | 7    | 1.332  | 1.614 | 1.167 | 1.424 | 16.49   | 7.69  | 4  | 7    | 728  | 82.6  | 6.95  |
| Q8C0S1   | DIS3-like exonuclease 1 OS=Mus musculus GN=Dis3l1 PE=2 SV=2 - [DIS3L1_MOUSE]                                        | 5.41  | 2 | 5  | 5  | 8    | 3.095  | 1.467 | 1.200 | 1.425 | 17.82   | 5.41  | 5  | 8    | 1053 | 120.2 | 6.81  |
| E9Q354   | Scm-like with four MBT domains protein 1 (Fragment) OS=Mus musculus GN=Sfmbt1 PE=2 SV=1 - [Sfmbt1_MOUSE]            | 3.46  | 2 | 1  | 1  | 1    | 0.978  | 1.211 | 1.147 | 1.426 | 0.00    | 3.46  | 1  | 1    | 636  | 72.1  | 6.65  |
| O70172   | Phosphatidylinositol 5-phosphate 4-kinase type-2 alpha OS=Mus musculus GN=Pip4k2a PE=1 SV=1 - [P42A_MOUSE]          | 36.79 | 3 | 9  | 15 | 112  | 1.027  | 0.783 | 1.386 | 1.426 | 317.13  | 36.79 | 28 | 112  | 405  | 46.1  | 6.99  |
| Q8BQV2   | Choline acetyltransferase OS=Mus musculus GN=Chat PE=2 SV=1 - [Q8BQV2_MOUSE]                                        | 18.45 | 2 | 8  | 9  | 16   | 0.992  | 1.077 | 2.084 | 1.427 | 47.67   | 18.45 | 14 | 16   | 645  | 72.3  | 7.62  |
| Q8BMV3   | Acylphosphatase-1 OS=Mus musculus GN=Acyp1 PE=4 SV=1 - [Q8BMV3_MOUSE]                                               | 16.67 | 1 | 1  | 2  | 3    | 0.946  | 1.123 | 1.042 | 1.427 | 4.85    | 16.67 | 3  | 3    | 108  | 11.9  | 6.90  |
| Q99N28   | Cell adhesion molecule 3 OS=Mus musculus GN=Cadm3 PE=1 SV=1 - [CADM3_MOUSE]                                         | 42.17 | 2 | 9  | 9  | 87   | 0.652  | 1.458 | 1.266 | 1.428 | 237.08  | 42.17 | 17 | 87   | 396  | 42.9  | 5.80  |
| B2RSH2   | Guanine nucleotide-binding protein G(i) subunit alpha-1 OS=Mus musculus GN=Gnai1 PE=2 SV=1 - [GNAI1_MOUSE]          | 66.38 | 6 | 10 | 20 | 385  | 0.751  | 1.462 | 1.329 | 1.429 | 1115.70 | 66.38 | 37 | 385  | 354  | 40.3  | 5.97  |
| Q7TSH7   | Potassium voltage-gated channel subfamily F member 1 OS=Mus musculus GN=Kcnf1 PE=2 SV=1 - [KCNF1_MOUSE]             | 3.25  | 2 | 1  | 1  | 1    | 1.301  | 1.165 | 1.378 | 1.429 | 0.00    | 3.25  | 1  | 1    | 493  | 55.6  | 6.06  |
| D3YV6    | Ketohexokinase (Fragment) OS=Mus musculus GN=Khk PE=2 SV=1 - [D3YV6_MOUSE]                                          | 11.07 | 1 | 2  | 3  | 8    | 0.852  | 1.080 | 1.089 | 1.429 | 22.91   | 11.07 | 6  | 8    | 244  | 27.2  | 6.23  |
| P63078   | Guanine nucleotide-binding protein G(T)/G(S)/G(O) subunit gamma-8 OS=Mus musculus GN=Gng8 PE=2 SV=1 - [GNG8_MOUSE]  | 47.14 | 1 | 2  | 2  | 13   | 0.745  | 0.466 | 0.723 | 1.429 | 53.66   | 47.14 | 4  | 13   | 70   | 7.8   | 7.14  |
| O35914   | Zinc finger protein basonuclin-1 OS=Mus musculus GN=Bnc1 PE=2 SV=1 - [BNCL_MOUSE]                                   | 1.56  | 2 | 1  | 1  | 1    | 35.658 | 1.265 | 3.003 | 1.430 | 3.21    | 1.56  | 1  | 1    | 961  | 106.6 | 6.42  |
| Q9D871   | Carcinoembryonic antigen-related cell adhesion molecule 18 OS=Mus musculus GN=Ceacam18 PE=2 SV=1 - [CEACAM18_MOUSE] | 2.13  | 1 | 1  | 1  | 1    | 1.606  | 1.241 | 1.871 | 1.430 | 2.69    | 2.13  | 1  | 1    | 376  | 42.2  | 6.76  |
| P00416   | Cytochrome c oxidase subunit 3 OS=Mus musculus GN=Mtco3 PE=3 SV=1 - [COX3_MOUSE]                                    | 5.36  | 2 | 1  | 1  | 3    | 2.035  | 1.472 | 1.380 | 1.430 | 8.05    | 5.36  | 2  | 3    | 261  | 29.9  | 7.30  |
| Q8BVL9   | Janus kinase and microtubule-interacting protein 1 OS=Mus musculus GN=Jakmip1 PE=1 SV=2 - [JAKMIP1_MOUSE]           | 34.82 | 5 | 2  | 21 | 77   | 2.268  | 1.867 | 2.029 | 1.432 | 206.85  | 34.82 | 36 | 77   | 626  | 73.1  | 6.09  |
| O55125   | Protein NipSnap homolog 1 OS=Mus musculus GN=Nipsnap1 PE=1 SV=1 - [NIPS1_MOUSE]                                     | 49.65 | 2 | 15 | 16 | 93   | 0.757  | 1.200 | 1.205 | 1.432 | 236.42  | 49.65 | 27 | 93   | 284  | 33.3  | 9.44  |
| Q9JKV5   | Secretory carrier-associated membrane protein 4 OS=Mus musculus GN=Scamp4 PE=2 SV=1 - [SCAMP4_MOUSE]                | 4.78  | 1 | 1  | 1  | 2    | 0.800  | 1.477 | 1.229 | 1.432 | 6.59    | 4.78  | 2  | 2    | 230  | 25.3  | 8.66  |
| P04186   | Complement factor B OS=Mus musculus GN=Cfb PE=1 SV=2 - [CFAB_MOUSE]                                                 | 15.64 | 9 | 13 | 13 | 33   | 2.516  | 1.983 | 0.616 | 1.433 | 85.06   | 15.64 | 23 | 33   | 761  | 85.0  | 7.37  |
| P35762   | CD81 antigen OS=Mus musculus GN=Cd81 PE=1 SV=2 - [CD81_MOUSE]                                                       | 30.93 | 1 | 4  | 4  | 240  | 1.525  | 1.166 | 1.110 | 1.433 | 714.62  | 30.93 | 6  | 240  | 236  | 25.8  | 5.83  |
| P04370-4 | Isoform 4 of Myelin basic protein OS=Mus musculus GN=Mbp - [MBP_MOUSE]                                              | 75.90 | 7 | 1  | 24 | 2328 | 1.059  | 0.395 | 1.899 | 1.433 | 6593.36 | 75.90 | 42 | 2328 | 195  | 21.5  | 11.24 |

|        |                                                                                                                          |       |    |    |    |      |       |       |       |       |         |       |     |      |      |       |      |
|--------|--------------------------------------------------------------------------------------------------------------------------|-------|----|----|----|------|-------|-------|-------|-------|---------|-------|-----|------|------|-------|------|
| Q8C5H8 | NAD kinase 2, mitochondrial OS=Mus musculus GN=Nadk2 PE=1 SV=2 - [NAKD2_MOUSE]                                           | 48.89 | 4  | 17 | 18 | 57   | 1.144 | 1.182 | 1.095 | 1.434 | 159.15  | 48.89 | 33  | 57   | 452  | 50.8  | 8.07 |
| P14231 | Sodium/potassium-transporting ATPase subunit beta-2 OS=Mus musculus GN=Atp1b2 PE=1 SV=2 - [Atp1b2_MOUSE]                 | 47.59 | 2  | 12 | 12 | 227  | 0.708 | 0.670 | 1.013 | 1.434 | 533.54  | 47.59 | 22  | 227  | 290  | 33.3  | 8.31 |
| P28650 | Adenylosuccinate synthetase isozyme 1 OS=Mus musculus GN=Adss1 PE=1 SV=2 - [PURA1_MOUSE]                                 | 45.95 | 3  | 16 | 18 | 63   | 1.206 | 0.384 | 1.228 | 1.434 | 193.27  | 45.95 | 32  | 63   | 457  | 50.2  | 8.43 |
| P08752 | Guanine nucleotide-binding protein G(i) subunit alpha-2 OS=Mus musculus GN=Gnai2 PE=1 SV=5 - [GNAI2_MOUSE]               | 68.17 | 6  | 12 | 22 | 361  | 0.627 | 1.095 | 0.954 | 1.434 | 1072.42 | 68.17 | 41  | 361  | 355  | 40.5  | 5.45 |
| E9PZS8 | Cytochrome c oxidase subunit 7A-related protein, mitochondrial OS=Mus musculus GN=Cox7a2 PE=2 SV=1 - [Cox7a2_MOUSE]      | 47.01 | 3  | 6  | 6  | 11   | 0.822 | 1.042 | 1.220 | 1.435 | 37.34   | 47.01 | 9   | 11   | 134  | 14.9  | 9.57 |
| Q9Z2G9 | Oxidoreductase HTATIP2 OS=Mus musculus GN=Htatip2 PE=1 SV=3 - [HTAI2_MOUSE]                                              | 15.70 | 2  | 4  | 4  | 4    | 1.015 | 1.420 | 1.068 | 1.435 | 10.87   | 15.70 | 4   | 4    | 242  | 26.9  | 8.59 |
| O09174 | Alpha-methylacyl-CoA racemase OS=Mus musculus GN=Amacr PE=1 SV=4 - [AMACR_MOUSE]                                         | 24.67 | 1  | 7  | 7  | 13   | 2.338 | 1.124 | 1.184 | 1.436 | 39.38   | 24.67 | 11  | 13   | 381  | 41.7  | 7.40 |
| Q8BPE4 | Transmembrane protein 177 OS=Mus musculus GN=Tmem177 PE=2 SV=1 - [TM177_MOUSE]                                           | 5.79  | 1  | 2  | 2  | 8    | 1.031 | 1.245 | 1.266 | 1.436 | 22.61   | 5.79  | 4   | 8    | 311  | 34.0  | 9.77 |
| Q6P9P6 | Kinesin-like protein KIF11 OS=Mus musculus GN=Kif11 PE=2 SV=1 - [KIF11_MOUSE]                                            | 1.24  | 1  | 1  | 1  | 1    | 1.603 | 2.402 | 1.706 | 1.436 | 2.95    | 1.24  | 1   | 1    | 1052 | 118.0 | 6.00 |
| Q6PIE5 | Sodium/potassium-transporting ATPase subunit alpha-2 OS=Mus musculus GN=Atp1a2 PE=1 SV=1 - [Atp1a2_MOUSE]                | 61.57 | 3  | 43 | 72 | 2881 | 0.803 | 0.730 | 1.055 | 1.436 | 8239.21 | 61.57 | 135 | 2881 | 1020 | 112.1 | 5.55 |
| Q61532 | Mitogen-activated protein kinase 6 OS=Mus musculus GN=Mapk6 PE=1 SV=3 - [MAPK6_MOUSE]                                    | 3.47  | 3  | 1  | 2  | 3    | 2.172 | 0.811 | 1.679 | 1.436 | 7.83    | 3.47  | 3   | 3    | 720  | 82.1  | 5.20 |
| Q8K4F5 | Alpha/beta hydrolase domain-containing protein 11 OS=Mus musculus GN=Abhd11 PE=2 SV=1 - [ABHDB_MOUSE]                    | 25.08 | 2  | 7  | 7  | 21   | 1.040 | 0.979 | 1.040 | 1.437 | 60.87   | 25.08 | 13  | 21   | 307  | 33.5  | 9.61 |
| A2BDQ4 | Eph receptor A7, isoform CRA_b OS=Mus musculus GN=Epha7 PE=4 SV=1 - [A2BDQ4_MOUSE]                                       | 11.77 | 10 | 4  | 9  | 20   | 1.885 | 1.283 | 1.696 | 1.437 | 57.37   | 11.77 | 14  | 20   | 994  | 111.3 | 5.80 |
| P23242 | Gap junction alpha-1 protein OS=Mus musculus GN=Gja1 PE=1 SV=2 - [CXA1_MOUSE]                                            | 43.72 | 1  | 11 | 11 | 164  | 1.043 | 0.881 | 1.322 | 1.439 | 490.10  | 43.72 | 19  | 164  | 382  | 43.0  | 8.76 |
| Q67BT3 | Solute carrier family 13 member 5 OS=Mus musculus GN=Slc13a5 PE=2 SV=1 - [SLC13A5_MOUSE]                                 | 3.32  | 1  | 2  | 2  | 11   | 0.685 | 1.311 | 1.114 | 1.439 | 35.82   | 3.32  | 4   | 11   | 572  | 63.8  | 7.64 |
| Q6XE40 | MAGUK p55 subfamily member 3 OS=Mus musculus GN=Mpp3 PE=2 SV=1 - [Q6XE40_MOUSE]                                          | 46.15 | 3  | 22 | 23 | 84   | 0.797 | 1.423 | 1.712 | 1.439 | 257.96  | 46.15 | 42  | 84   | 585  | 66.4  | 6.47 |
| E9Q5P6 | Protein Pdzr4 OS=Mus musculus GN=Pdzr4 PE=2 SV=1 - [E9Q5P6_MOUSE]                                                        | 1.55  | 2  | 1  | 1  | 1    | 4.921 | 2.310 | 1.946 | 1.440 | 2.39    | 1.55  | 1   | 1    | 775  | 88.6  | 5.30 |
| Q9EQK5 | Major vault protein OS=Mus musculus GN=Mvp PE=1 SV=4 - [MVP_MOUSE]                                                       | 20.33 | 3  | 14 | 14 | 40   | 1.017 | 1.081 | 1.113 | 1.440 | 118.82  | 20.33 | 22  | 40   | 861  | 95.9  | 5.59 |
| Q61165 | Sodium/hydrogen exchanger 1 OS=Mus musculus GN=Slc9a1 PE=1 SV=1 - [SLC9A1_MOUSE]                                         | 18.90 | 1  | 12 | 12 | 46   | 0.792 | 0.776 | 1.397 | 1.440 | 142.00  | 18.90 | 21  | 46   | 820  | 91.4  | 7.12 |
| Q14DI5 | Protein Zbtb4 OS=Mus musculus GN=Zbtb4 PE=2 SV=1 - [Q14DI5_MOUSE]                                                        | 8.24  | 2  | 1  | 1  | 2    | 2.258 | 1.721 | 0.951 | 1.440 | 6.56    | 8.24  | 1   | 2    | 364  | 38.1  | 8.60 |
| Q9EQ20 | Methylmalonate-semialdehyde dehydrogenase [acylating], mitochondrial OS=Mus musculus GN=Aldh6a1 PE=1 SV=1 - [MMSA_MOUSE] | 58.88 | 2  | 27 | 27 | 212  | 0.767 | 1.363 | 1.088 | 1.441 | 641.31  | 58.88 | 52  | 212  | 535  | 57.9  | 8.07 |
| B0R0D5 | FERM domain-containing protein 5 (Fragment) OS=Mus musculus GN=Firm5 PE=2 SV=1 - [B0R0D5_MOUSE]                          | 15.40 | 10 | 5  | 5  | 11   | 0.613 | 0.598 | 1.156 | 1.442 | 34.02   | 15.40 | 8   | 11   | 500  | 56.3  | 8.91 |
| E9Q800 | Mitochondrial inner membrane protein OS=Mus musculus GN=Immt PE=2 SV=1 - [E9Q800_MOUSE]                                  | 68.63 | 2  | 2  | 51 | 290  | 1.335 | 1.593 | 1.862 | 1.442 | 881.80  | 68.63 | 91  | 290  | 679  | 75.6  | 7.80 |
| Q9D267 | Epididymal-specific lipocalin-9 OS=Mus musculus GN=Lcn9 PE=2 SV=1 - [LCN9_MOUSE]                                         | 11.24 | 1  | 1  | 1  | 2    | 1.300 | 1.205 | 1.579 | 1.442 | 0.00    | 11.24 | 1   | 2    | 178  | 20.5  | 6.77 |

|          |                                                                                                                     |       |    |    |    |     |       |       |       |       |         |       |    |     |      |       |       |
|----------|---------------------------------------------------------------------------------------------------------------------|-------|----|----|----|-----|-------|-------|-------|-------|---------|-------|----|-----|------|-------|-------|
| Q6PFX8   | N-acetylaspartyl-glutamate synthetase A OS=Mus musculus GN=Rimk1a PE=1 SV=1 - [RIMKA_MOUSE]                         | 8.42  | 1  | 3  | 3  | 6   | 3.616 | 0.649 | 1.366 | 1.443 | 15.47   | 8.42  | 4  | 6   | 380  | 41.5  | 6.65  |
| Q99PE8   | ATP-binding cassette sub-family G member 5 OS=Mus musculus GN=Abcg5 PE=1 SV=1 - [ABCG5_MOUSE]                       | 5.98  | 2  | 1  | 2  | 14  | 1.651 | 0.883 | 1.335 | 1.443 | 33.56   | 5.98  | 3  | 14  | 652  | 73.2  | 8.06  |
| Q80V42   | Carboxypeptidase M OS=Mus musculus GN=Cpm PE=2 SV=2 - [CBPM_MOUSE]                                                  | 24.83 | 2  | 9  | 9  | 33  | 1.901 | 0.461 | 1.295 | 1.443 | 102.76  | 24.83 | 17 | 33  | 443  | 50.5  | 7.78  |
| P31809-3 | Isoform 3 of Carcinoembryonic antigen-related cell adhesion molecule 1 OS=Mus musculus GN=Ceacam1 - [CEACAM1_MOUSE] | 9.38  | 5  | 2  | 2  | 3   | 1.565 | 1.837 | 1.255 | 1.444 | 8.82    | 9.38  | 3  | 3   | 341  | 37.2  | 6.23  |
| Q9CR62   | Mitochondrial 2-oxoglutarate/malate carrier protein OS=Mus musculus GN=Slc25a11 PE=1 SV=3 - [SLC25A11_MOUSE]        | 58.92 | 3  | 15 | 15 | 80  | 0.609 | 1.164 | 1.194 | 1.444 | 245.44  | 58.92 | 28 | 80  | 314  | 34.1  | 9.94  |
| P63143   | Voltage-gated potassium channel subunit beta-1 OS=Mus musculus GN=Kcnab1 PE=2 SV=2 - [KCAB1_MOUSE]                  | 28.18 | 5  | 8  | 10 | 18  | 1.017 | 0.758 | 1.301 | 1.444 | 37.39   | 28.18 | 15 | 18  | 401  | 44.7  | 9.32  |
| E9Q951   | Zinc finger protein 426 OS=Mus musculus GN=Zfp426 PE=2 SV=1 - [E9Q951_MOUSE]                                        | 4.55  | 8  | 1  | 3  | 9   | 1.578 | 2.088 | 1.051 | 1.445 | 16.41   | 4.55  | 5  | 9   | 483  | 55.5  | 8.73  |
| Q91VM4   | Protein spinster homolog 2 OS=Mus musculus GN=Spns2 PE=2 SV=2 - [SPNS2_MOUSE]                                       | 2.73  | 1  | 1  | 1  | 2   | 1.016 | 0.747 | 1.203 | 1.447 | 3.91    | 2.73  | 2  | 2   | 549  | 58.2  | 9.17  |
| AZAR81   | T-box brain protein 1 OS=Mus musculus GN=Tbr1 PE=2 SV=1 - [AZAR81_MOUSE]                                            | 24.40 | 2  | 7  | 7  | 9   | 1.016 | 2.179 | 2.269 | 1.447 | 28.88   | 24.40 | 9  | 9   | 418  | 44.8  | 7.17  |
| O35324   | SH2 domain-containing protein 1B OS=Mus musculus GN=Sh2d1b PE=1 SV=1 - [SH2D1B_MOUSE]                               | 13.64 | 2  | 1  | 1  | 1   | 0.551 | 0.819 | 1.912 | 1.448 | 0.00    | 13.64 | 1  | 1   | 132  | 15.2  | 7.33  |
| Q5NCE8   | Magnesium transporter MRS2 homolog, mitochondrial OS=Mus musculus GN=Mrs2 PE=2 SV=2 - [MRS2_MOUSE]                  | 21.89 | 1  | 8  | 8  | 15  | 1.157 | 1.052 | 1.303 | 1.448 | 38.96   | 21.89 | 11 | 15  | 434  | 49.3  | 7.53  |
| P03995   | Glial fibrillary acidic protein OS=Mus musculus GN=Gfap PE=1 SV=4 - [GFAP_MOUSE]                                    | 77.67 | 4  | 3  | 37 | 510 | 1.505 | 1.699 | 0.886 | 1.449 | 1433.72 | 77.67 | 68 | 510 | 430  | 49.9  | 5.34  |
| A2AS15   | Protein Scn3a OS=Mus musculus GN=Scn3a PE=3 SV=1 - [A2AS15_MOUSE]                                                   | 10.79 | 11 | 6  | 20 | 70  | 1.278 | 1.494 | 1.087 | 1.451 | 212.47  | 10.79 | 34 | 70  | 1947 | 220.7 | 5.72  |
| Q8BKV0-2 | Isoform 2 of Testican-3 OS=Mus musculus GN=Spock3 - [TICN3_MOUSE]                                                   | 13.16 | 2  | 3  | 5  | 9   | 3.848 | 1.004 | 1.411 | 1.451 | 19.76   | 13.16 | 9  | 9   | 433  | 48.7  | 5.16  |
| P61967   | AP-1 complex subunit sigma-1A OS=Mus musculus GN=Ap1s1 PE=1 SV=1 - [AP1S1_MOUSE]                                    | 23.42 | 3  | 1  | 3  | 13  | 0.893 | 1.336 | 1.404 | 1.452 | 36.84   | 23.42 | 5  | 13  | 158  | 18.7  | 5.73  |
| Q91YPO   | L-2-hydroxyglutarate dehydrogenase, mitochondrial OS=Mus musculus GN=L2hgdh PE=2 SV=1 - [L2HGDH_MOUSE]              | 40.30 | 1  | 16 | 16 | 56  | 0.770 | 1.672 | 1.173 | 1.453 | 146.66  | 40.30 | 25 | 56  | 464  | 50.9  | 8.29  |
| D6RCZ6   | Presenilins-associated rhomboid-like protein, mitochondrial OS=Mus musculus GN=Parl PE=2 SV=1 - [D6RCZ6_MOUSE]      | 16.81 | 3  | 1  | 1  | 4   | 1.193 | 2.017 | 2.360 | 1.453 | 12.39   | 16.81 | 2  | 4   | 119  | 13.3  | 10.68 |
| D3YWD9   | Growth arrest-specific protein 2 OS=Mus musculus GN=Gas2 PE=2 SV=1 - [D3YWD9_MOUSE]                                 | 4.15  | 2  | 1  | 1  | 1   | 1.498 | 1.087 | 1.190 | 1.454 | 2.59    | 4.15  | 1  | 1   | 265  | 29.3  | 7.56  |
| O35242   | Protein FAN OS=Mus musculus GN=Nsmf PE=2 SV=2 - [FAN_MOUSE]                                                         | 3.80  | 1  | 3  | 3  | 4   | 0.879 | 0.488 | 1.301 | 1.454 | 8.00    | 3.80  | 4  | 4   | 920  | 104.5 | 5.91  |
| P21981   | Protein-glutamine gamma-glutamyltransferase 2 OS=Mus musculus GN=Tgm2 PE=1 SV=4 - [TGM2_MOUSE]                      | 38.63 | 2  | 20 | 20 | 72  | 0.922 | 2.581 | 1.161 | 1.454 | 249.70  | 38.63 | 34 | 72  | 686  | 77.0  | 5.10  |
| G3UXZ6   | Polypyrimidine tract-binding protein 3 OS=Mus musculus GN=Ptbp3 PE=2 SV=1 - [G3UXZ6_MOUSE]                          | 60.00 | 1  | 1  | 1  | 1   | 0.569 | 0.698 | 1.644 | 1.454 | 3.08    | 60.00 | 1  | 1   | 45   | 4.6   | 4.91  |
| Q80X19-2 | Isoform 2 of Collagen alpha-1(XIV) chain OS=Mus musculus GN=Col14a1 - [COL14A1_MOUSE]                               | 2.98  | 4  | 4  | 4  | 5   | 1.990 | 1.298 | 1.047 | 1.455 | 6.47    | 2.98  | 5  | 5   | 1781 | 191.2 | 5.15  |
| Q9CZ69   | CKLF-like MARVEL transmembrane domain-containing protein 6 OS=Mus musculus GN=Cntm6 PE=2 SV=1 - [CNTM6_MOUSE]       | 5.46  | 1  | 1  | 1  | 1   | 6.708 | 3.154 | 1.162 | 1.456 | 2.17    | 5.46  | 1  | 1   | 183  | 19.8  | 6.29  |
| Q78TU8   | Family with sequence similarity 107, member A OS=Mus musculus GN=Fam107a PE=2 SV=1 - [Q78TU8_MOUSE]                 | 24.31 | 4  | 3  | 4  | 14  | 0.901 | 0.793 | 2.261 | 1.456 | 33.10   | 24.31 | 7  | 14  | 144  | 17.5  | 9.74  |

|          |                                                                                                                      |       |   |    |    |      |       |       |       |       |          |       |    |      |      |       |       |
|----------|----------------------------------------------------------------------------------------------------------------------|-------|---|----|----|------|-------|-------|-------|-------|----------|-------|----|------|------|-------|-------|
| Q8BNW9   | Kelch repeat and BTB domain-containing protein 11 OS=Mus musculus GN=Kbtbd11 PE=1 SV=3 - [KBTBB_MOUSE]               | 45.66 | 1 | 19 | 19 | 99   | 0.750 | 1.571 | 1.463 | 1.456 | 306.02   | 45.66 | 35 | 99   | 633  | 67.9  | 5.39  |
| A2A5V4   | SH3 domain-binding protein 1 OS=Mus musculus GN=Sh3bp1 PE=2 SV=1 -                                                   | 12.21 | 4 | 6  | 6  | 20   | 0.940 | 1.353 | 1.442 | 1.456 | 78.32    | 12.21 | 10 | 20   | 680  | 74.1  | 6.60  |
| Q8VHP7   | Leukocyte elastase inhibitor B OS=Mus musculus GN=Serpinb1b PE=1 SV=1 -                                              | 23.30 | 4 | 5  | 10 | 19   | 1.198 | 0.801 | 0.858 | 1.457 | 47.75    | 23.30 | 15 | 19   | 382  | 42.9  | 6.74  |
| Q6ZQ18-2 | Isoform 2 of Protein EFR3 homolog B OS=Mus musculus GN=Efr3b - [EFR3B_MOUSE]                                         | 28.59 | 2 | 15 | 17 | 55   | 0.671 | 1.218 | 1.419 | 1.459 | 194.13   | 28.59 | 30 | 55   | 773  | 87.5  | 6.68  |
| Q91WT7   | 3-alpha-hydroxysteroid dehydrogenase type 1 OS=Mus musculus GN=Akr1c14 PE=2 SV=1 - [Q91WT7_MOUSE]                    | 5.88  | 1 | 1  | 1  | 2    | 1.325 | 1.202 | 1.158 | 1.460 | 4.36     | 5.88  | 2  | 2    | 323  | 37.2  | 7.20  |
| Q9WUD0   | Cytochrome P450 2B10 OS=Mus musculus GN=Cyp2b10 PE=2 SV=1 - [Q9WUD0_MOUSE]                                           | 3.05  | 3 | 1  | 1  | 2    | 3.937 | 3.056 | 0.442 | 1.460 | 2.43     | 3.05  | 2  | 2    | 491  | 55.8  | 7.83  |
| Q8BHX3-2 | Isoform 2 of Borealin OS=Mus musculus GN=Cdc48 - [BOREA_MOUSE]                                                       | 12.27 | 4 | 3  | 3  | 5    | 1.391 | 1.215 | 1.325 | 1.461 | 3.97     | 12.27 | 3  | 5    | 326  | 36.6  | 10.24 |
| Q9WUT3   | Ribosomal protein S6 kinase alpha-2 OS=Mus musculus GN=Rps6ka2 PE=2 SV=1 -                                           | 45.43 | 9 | 20 | 29 | 95   | 1.030 | 1.472 | 1.141 | 1.461 | 263.54   | 45.43 | 48 | 95   | 733  | 83.1  | 8.50  |
| P56400   | Platelet glycoprotein Ib beta chain OS=Mus musculus GN=Gp1bb PE=1 SV=1 -                                             | 13.11 | 2 | 2  | 2  | 4    | 1.973 | 3.141 | 0.958 | 1.462 | 9.56     | 13.11 | 3  | 4    | 206  | 21.7  | 10.43 |
| O54991   | Contactin-associated protein 1 OS=Mus musculus GN=Crtnap1 PE=1 SV=2 -                                                | 31.19 | 1 | 36 | 36 | 177  | 0.798 | 0.736 | 1.288 | 1.462 | 529.97   | 31.19 | 64 | 177  | 1385 | 156.2 | 7.06  |
| Q9J139   | ATP-binding cassette sub-family B member 10, mitochondrial OS=Mus musculus GN=Abcb10 PE=2 SV=1 - [ABCB10_MOUSE]      | 20.28 | 1 | 8  | 9  | 20   | 0.731 | 1.049 | 1.028 | 1.462 | 76.03    | 20.28 | 14 | 20   | 715  | 77.1  | 9.60  |
| Q8VEH6   | COBW domain-containing protein 1 OS=Mus musculus GN=Cbwd1 PE=2 SV=1 -                                                | 7.38  | 2 | 2  | 2  | 6    | 1.654 | 1.459 | 1.555 | 1.463 | 15.95    | 7.38  | 3  | 6    | 393  | 43.7  | 4.89  |
| Q99L13   | 3-hydroxyisobutyrate dehydrogenase, mitochondrial OS=Mus musculus GN=Hibadh PE=2 SV=1 - [HIBADH_MOUSE]               | 36.72 | 1 | 10 | 10 | 62   | 1.264 | 0.739 | 1.065 | 1.463 | 193.08   | 36.72 | 19 | 62   | 335  | 35.4  | 8.13  |
| Q80S27   | Guanine nucleotide-binding protein G(I)/G(S)/G(O) subunit gamma-5 OS=Mus musculus GN=Gng5 PE=2 SV=1 - [GNG5_MOUSE]   | 33.82 | 2 | 3  | 3  | 12   | 1.982 | 1.605 | 1.455 | 1.463 | 29.19    | 33.82 | 5  | 12   | 68   | 7.3   | 9.85  |
| Q8BGT9   | Polypeptide N-acetylgalactosaminyltransferase 12 OS=Mus musculus GN=Galnt12 PE=2 SV=1 - [GALNT12_MOUSE]              | 1.74  | 1 | 1  | 1  | 1    | 1.191 | 1.101 | 1.334 | 1.465 | 1.97     | 1.74  | 1  | 1    | 576  | 66.5  | 7.24  |
| Q80Y77   | Myomegalin OS=Mus musculus GN=Pde4dip PE=2 SV=2 - [MYOME_MOUSE]                                                      | 7.64  | 5 | 5  | 16 | 38   | 2.068 | 0.990 | 1.172 | 1.466 | 104.97   | 7.64  | 26 | 38   | 2224 | 250.5 | 5.53  |
| P68368   | Tubulin alpha-4A chain OS=Mus musculus GN=Tuba4a PE=1 SV=1 - [TBA4A_MOUSE]                                           | 68.75 | 1 | 12 | 31 | 3452 | 0.999 | 1.608 | 1.427 | 1.467 | 10425.83 | 68.75 | 58 | 3452 | 448  | 49.9  | 5.06  |
| Q8CGC6   | RNA-binding protein 28 OS=Mus musculus GN=Rbm28 PE=1 SV=4 - [RBM28_MOUSE]                                            | 0.93  | 1 | 1  | 1  | 2    | 1.499 | 1.188 | 1.096 | 1.467 | 4.47     | 0.93  | 1  | 2    | 750  | 84.2  | 9.54  |
| Q64446   | Copper-transporting ATPase 2 OS=Mus musculus GN=Atp7b PE=1 SV=2 - [ATP7B_MOUSE]                                      | 3.76  | 2 | 4  | 4  | 4    | 1.275 | 1.269 | 1.540 | 1.468 | 9.33     | 3.76  | 4  | 4    | 1462 | 157.1 | 6.65  |
| Q8CIH5   | 1-phosphatidylinositol 4,5-bisphosphate phosphodiesterase gamma-2 OS=Mus musculus GN=Ptcg2 PE=1 SV=1 - [PLCG2_MOUSE] | 5.38  | 4 | 3  | 5  | 9    | 0.676 | 0.978 | 1.251 | 1.468 | 19.47    | 5.38  | 7  | 9    | 1265 | 147.5 | 6.77  |
| Q5NCB5   | Immunity-related GTPase family M protein 1 (Fragment) OS=Mus musculus GN=Irgm1 PE=2 SV=1 - [Q5NCB5_MOUSE]            | 29.51 | 3 | 8  | 8  | 14   | 0.701 | 1.228 | 1.022 | 1.468 | 45.55    | 29.51 | 12 | 14   | 288  | 32.3  | 6.42  |
| J3QP58   | Synphilin-1 OS=Mus musculus GN=Sncalp PE=4 SV=1 - [J3QP58_MOUSE]                                                     | 7.16  | 6 | 2  | 2  | 11   | 1.143 | 1.466 | 1.305 | 1.469 | 1.86     | 7.16  | 2  | 11   | 503  | 54.9  | 7.50  |
| Q80YR2-2 | Isoform 2 of Protein FAM160B2 OS=Mus musculus GN=Fam160b2 - [F16B2_MOUSE]                                            | 5.15  | 2 | 2  | 2  | 2    | 1.409 | 0.707 | 0.592 | 1.469 | 7.60     | 5.15  | 2  | 2    | 544  | 59.8  | 5.35  |
| D3YU12   | NmrA-like family domain-containing protein 1 OS=Mus musculus GN=NmrA1 PE=2 SV=1 - [D3YU12_MOUSE]                     | 39.80 | 5 | 12 | 12 | 45   | 0.897 | 0.743 | 1.234 | 1.470 | 120.70   | 39.80 | 22 | 45   | 299  | 33.1  | 6.80  |



|          |                                                                                                                              |       |   |    |    |     |       |       |       |       |         |       |    |     |      |       |      |
|----------|------------------------------------------------------------------------------------------------------------------------------|-------|---|----|----|-----|-------|-------|-------|-------|---------|-------|----|-----|------|-------|------|
| P26048   | Gamma-aminobutyric acid receptor subunit alpha-2<br>OS=Mus musculus<br>GN=Gabra2 PE=1 SV=1 - [GBRA2_MOUSE]                   | 15.52 | 1 | 3  | 8  | 47  | 1.398 | 2.330 | 1.066 | 1.470 | 115.82  | 15.52 | 15 | 47  | 451  | 51.1  | 9.06 |
| Q7TSH8   | Uncharacterized protein KIAA0195 OS=Mus musculus GN=Kiaa0195 PE=1 SV=1 -                                                     | 6.69  | 5 | 9  | 10 | 17  | 0.570 | 1.059 | 1.224 | 1.470 | 41.31   | 6.69  | 15 | 17  | 1360 | 151.7 | 6.46 |
| Q8CD19   | LanC-like protein 3 OS=Mus musculus GN=Lanc3 PE=2 SV=2 - [LANC3_MOUSE]                                                       | 15.24 | 2 | 4  | 4  | 8   | 0.884 | 1.024 | 0.888 | 1.470 | 14.61   | 15.24 | 5  | 8   | 420  | 46.4  | 7.05 |
| F6VUT6   | Protein Gm8251 OS=Mus musculus GN=Gm8251 PE=4 SV=1 - [F6VUT6_MOUSE]                                                          | 2.16  | 1 | 2  | 3  | 5   | 1.598 | 1.273 | 1.436 | 1.471 | 9.71    | 2.16  | 3  | 5   | 1994 | 225.8 | 9.74 |
| O35963   | Ras-related protein Rab-33B OS=Mus musculus GN=Rab33b PE=1 SV=1 - [RB33B_MOUSE]                                              | 38.86 | 1 | 4  | 9  | 68  | 0.763 | 1.037 | 1.352 | 1.472 | 193.19  | 38.86 | 15 | 68  | 229  | 25.7  | 7.69 |
| Q5HZI9   | Solute carrier family 25 member 51 OS=Mus musculus GN=Slc25a51 PE=2 SV=1 -                                                   | 29.53 | 4 | 8  | 8  | 24  | 0.968 | 1.278 | 1.046 | 1.472 | 67.65   | 29.53 | 16 | 24  | 298  | 33.7  | 9.66 |
| E9PW06   | Neurofascin OS=Mus musculus GN=Nfasc PE=2 SV=1 - [E9PW06_MOUSE]                                                              | 46.59 | 2 | 9  | 51 | 339 | 1.726 | 0.271 | 1.161 | 1.473 | 1046.21 | 46.59 | 86 | 339 | 1174 | 132.1 | 6.79 |
| Q69ZM6-2 | Isoform 2 of N-acetylglucosamine-1-phosphotransferase subunits alpha/beta OS=Mus musculus                                    | 1.01  | 2 | 1  | 1  | 2   | 0.791 | 2.869 | 1.535 | 1.473 | 0.00    | 1.01  | 1  | 2   | 1189 | 135.2 | 7.59 |
| Q8R238   | Serine dehydratase-like OS=Mus musculus GN=Sdsl PE=2 SV=1 - [SDSL_MOUSE]                                                     | 16.72 | 2 | 5  | 5  | 8   | 0.996 | 1.033 | 0.960 | 1.473 | 19.11   | 16.72 | 6  | 8   | 329  | 34.7  | 6.43 |
| Q8K440-2 | Isoform 2 of ATP-binding cassette sub-family A member 8-B OS=Mus musculus GN=Abca8b - [ABCB8_MOUSE]                          | 3.27  | 2 | 3  | 3  | 5   | 1.061 | 1.630 | 0.840 | 1.473 | 10.19   | 3.27  | 5  | 5   | 1558 | 176.1 | 7.03 |
| Q5H8B9   | FRAS1-related extracellular matrix protein 3 OS=Mus musculus GN=Frem3 PE=2 SV=2 - [FREM3_MOUSE]                              | 1.22  | 2 | 2  | 3  | 4   | 0.472 | 0.943 | 1.126 | 1.474 | 8.75    | 1.22  | 3  | 4   | 2123 | 234.9 | 5.17 |
| Q8VFJ3   | MCG141852 OS=Mus musculus GN=Olfir836 PE=2 SV=1 - [Q8VFJ3_MOUSE]                                                             | 3.47  | 1 | 1  | 1  | 3   | 1.005 | 1.006 | 1.021 | 1.477 | 9.47    | 3.47  | 1  | 3   | 317  | 35.7  | 7.31 |
| A7UAK4   | 6-phosphofructo-2-kinase/fructose-2, 6-biphosphatase 3 splice variant 1 OS=Mus musculus GN=Pfkfb3 PE=2 SV=1 - [A7UAK4_MOUSE] | 9.09  | 8 | 2  | 4  | 9   | 1.264 | 0.814 | 1.185 | 1.477 | 23.77   | 9.09  | 6  | 9   | 462  | 53.4  | 7.91 |
| Q9DA75   | Major facilitator superfamily domain-containing protein 2A OS=Mus musculus GN=Mfsd2a PE=2 SV=1 - [MFS2A_MOUSE]               | 3.37  | 1 | 1  | 1  | 1   | 2.220 | 2.164 | 1.150 | 1.477 | 0.00    | 3.37  | 1  | 1   | 534  | 58.9  | 7.02 |
| P61226   | Ras-related protein Rap-2b OS=Mus musculus GN=Rap2b PE=1 SV=1 - [RAP2B_MOUSE]                                                | 50.82 | 1 | 2  | 7  | 51  | 0.673 | 1.751 | 1.534 | 1.478 | 167.68  | 50.82 | 14 | 51  | 183  | 20.5  | 4.81 |
| A6PWR8   | Ubiquitin carboxyl-terminal hydrolase 43 OS=Mus musculus GN=Usp43 PE=2 SV=1 - [A6PWR8_MOUSE]                                 | 2.31  | 3 | 2  | 3  | 3   | 1.805 | 2.467 | 1.630 | 1.478 | 4.67    | 2.31  | 3  | 3   | 1127 | 123.3 | 9.39 |
| Q8K0L9-2 | Isoform 2 of Zinc finger and BTB domain-containing protein 20 OS=Mus musculus GN=Zbtb20 - [ZBTB20_MOUSE]                     | 15.72 | 3 | 6  | 7  | 12  | 0.749 | 0.864 | 1.727 | 1.478 | 25.19   | 15.72 | 10 | 12  | 668  | 73.3  | 6.49 |
| Q8R151   | NFX1-type zinc finger-containing protein 1 OS=Mus musculus GN=Znfx1 PE=2 SV=3 - [ZNF1_MOUSE]                                 | 11.05 | 4 | 19 | 21 | 40  | 0.986 | 1.319 | 1.478 | 1.480 | 97.47   | 11.05 | 31 | 40  | 1909 | 218.7 | 7.47 |
| Q14BE9   | Protein Tekt5 OS=Mus musculus GN=Tekt5 PE=2 SV=1 - [Q14BE9_MOUSE]                                                            | 7.23  | 2 | 1  | 3  | 4   | 2.940 | 0.879 | 1.582 | 1.480 | 10.31   | 7.23  | 3  | 4   | 415  | 48.1  | 7.11 |
| P98086   | Complement C1q subcomponent subunit A OS=Mus musculus GN=C1qa PE=1 SV=2 - [C1QA_MOUSE]                                       | 10.20 | 1 | 2  | 2  | 13  | 0.953 | 1.782 | 1.631 | 1.481 | 38.04   | 10.20 | 4  | 13  | 245  | 26.0  | 9.11 |
| Q8BH02   | Torsin-4A OS=Mus musculus GN=Tor4a PE=2 SV=1 - [TOR4A_MOUSE]                                                                 | 9.62  | 1 | 2  | 2  | 2   | 1.495 | 0.241 | 1.626 | 1.481 | 2.41    | 9.62  | 2  | 2   | 426  | 47.6  | 8.62 |
| Q9CXJ4   | ATP-binding cassette sub-family B member 8, mitochondrial OS=Mus musculus GN=Abcb8 PE=2 SV=1 - [ABCB8_MOUSE]                 | 26.22 | 3 | 15 | 16 | 57  | 0.924 | 1.240 | 1.240 | 1.482 | 158.63  | 26.22 | 30 | 57  | 717  | 78.0  | 9.07 |
| Q8K3A0   | Iron-sulfur cluster co-chaperone protein HscB, mitochondrial OS=Mus musculus GN=Hscb PE=2 SV=2 - [HSC20_MOUSE]               | 45.30 | 3 | 10 | 10 | 34  | 1.741 | 1.413 | 1.997 | 1.482 | 113.64  | 45.30 | 15 | 34  | 234  | 26.6  | 7.37 |
| O88533   | Aromatic-L-amino-acid decarboxylase OS=Mus musculus GN=Ddc PE=2 SV=1 - [DDC_MOUSE]                                           | 31.25 | 2 | 12 | 12 | 50  | 1.370 | 0.580 | 1.069 | 1.482 | 161.88  | 31.25 | 22 | 50  | 480  | 53.8  | 6.60 |

|          |                                                                                                             |       |    |    |    |     |       |       |       |       |         |       |    |     |      |       |      |
|----------|-------------------------------------------------------------------------------------------------------------|-------|----|----|----|-----|-------|-------|-------|-------|---------|-------|----|-----|------|-------|------|
| P07309   | Transthyretin OS=Mus musculus GN=Tr PE=1 SV=1 - [TTHY_MOUSE]                                                | 15.65 | 4  | 3  | 3  | 6   | 4.412 | 3.025 | 1.004 | 1.483 | 10.68   | 15.65 | 5  | 6   | 147  | 15.8  | 6.16 |
| Q62181   | Semaphorin-3C OS=Mus musculus GN=Sema3c PE=1 SV=2 - [SEM3C_MOUSE]                                           | 1.46  | 1  | 1  | 1  | 1   | 1.569 | 1.546 | 1.408 | 1.484 | 2.19    | 1.46  | 1  | 1   | 751  | 85.2  | 8.65 |
| H3BLR1   | G/T mismatch-specific thymine DNA glycosylase (Fragment) OS=Mus musculus GN=Tdg PE=4 SV=1 - [H3BLR1_MOUSE]  | 11.71 | 5  | 1  | 1  | 1   | 1.060 | 0.594 | 1.629 | 1.484 | 1.90    | 11.71 | 1  | 1   | 111  | 12.4  | 8.18 |
| MOQWK0   | Zinc finger protein 451 OS=Mus musculus GN=Zfp451 PE=4 SV=1 - [MOQWK0_MOUSE]                                | 9.48  | 1  | 1  | 1  | 1   | 2.567 | 0.591 | 0.678 | 1.484 | 2.02    | 9.48  | 1  | 1   | 116  | 12.3  | 4.46 |
| Q80W21   | Glutathione S-transferase Mu 7 OS=Mus musculus GN=Gstm7 PE=1 SV=1 - [GSTM7_MOUSE]                           | 75.23 | 6  | 8  | 16 | 217 | 1.011 | 1.393 | 0.976 | 1.484 | 739.72  | 75.23 | 29 | 217 | 218  | 25.7  | 6.80 |
| Q8VD37   | SH3-containing GRB2-like protein 3-interacting protein 1 OS=Mus musculus GN=Sjip1 PE=1 SV=1 - [SGIP1_MOUSE] | 52.73 | 5  | 1  | 33 | 202 | 1.257 | 1.104 | 1.710 | 1.485 | 556.81  | 52.73 | 59 | 202 | 806  | 86.0  | 7.87 |
| Q9CPN8   | Insulin-like growth factor 2 mRNA-binding protein 3 OS=Mus musculus GN=Igf2bp3 PE=1 SV=1 - [IF2B3_MOUSE]    | 2.42  | 1  | 1  | 1  | 1   | 1.980 | 3.958 | 2.174 | 1.485 | 2.73    | 2.42  | 1  | 1   | 579  | 63.5  | 8.87 |
| Q9CQY6   | Mitochondrial nucleoid factor 1 OS=Mus musculus GN=Mnf1 PE=1 SV=1 - [MNFL_MOUSE]                            | 62.50 | 3  | 7  | 7  | 28  | 0.822 | 1.024 | 1.138 | 1.485 | 100.84  | 62.50 | 12 | 28  | 136  | 16.3  | 9.19 |
| Q62417-2 | Isoform 2 of Sorbin and SH3 domain-containing protein 1 OS=Mus musculus GN=Sorbs1 - [SRBS1_MOUSE]           | 45.14 | 5  | 1  | 26 | 126 | 1.111 | 1.264 | 1.847 | 1.488 | 364.15  | 45.14 | 48 | 126 | 740  | 82.8  | 7.85 |
| Q8BG93   | Probable 8-oxo-dGTP diphosphatase NUDT15 OS=Mus musculus GN=Nudt15 PE=1 SV=1 - [NUD15_MOUSE]                | 6.47  | 1  | 1  | 1  | 4   | 1.441 | 1.506 | 1.206 | 1.489 | 10.50   | 6.47  | 2  | 4   | 170  | 19.6  | 5.27 |
| P55200-2 | Isoform 2 of Histone-lysine N-methyltransferase 2A OS=Mus musculus GN=Kmt2a - [KMT2A_MOUSE]                 | 2.65  | 2  | 6  | 6  | 7   | 1.374 | 1.115 | 1.133 | 1.489 | 23.31   | 2.65  | 7  | 7   | 3963 | 429.1 | 9.16 |
| Q8R100   | Protein FAM26E OS=Mus musculus GN=Fam26e PE=2 SV=1 - [FA26E_MOUSE]                                          | 10.68 | 1  | 2  | 2  | 3   | 0.889 | 2.114 | 1.524 | 1.490 | 4.03    | 10.68 | 3  | 3   | 309  | 35.3  | 8.18 |
| Q8BLB8   | Ankyrin repeat domain-containing protein 34C OS=Mus musculus GN=Ankrd34c PE=2 SV=1 [AN34C_MOUSE]            | 4.68  | 1  | 2  | 2  | 2   | 1.738 | 0.774 | 0.814 | 1.490 | 2.55    | 4.68  | 2  | 2   | 534  | 58.1  | 9.17 |
| Q9JMF3   | Guanine nucleotide-binding protein G(1)/G(S)/G(O) subunit gamma-13 OS=Mus musculus GN=Gng13                 | 46.27 | 1  | 4  | 4  | 23  | 0.811 | 2.646 | 2.117 | 1.490 | 56.12   | 46.27 | 6  | 23  | 67   | 8.0   | 5.45 |
| Q9D952   | Enyoplakin OS=Mus musculus GN=Evgl PE=2 SV=3 - [EVL_MOUSE]                                                  | 1.43  | 1  | 1  | 4  | 7   | 2.117 | 0.947 | 1.817 | 1.491 | 10.68   | 1.43  | 4  | 7   | 2035 | 231.9 | 6.60 |
| P0C7A0   | KH homology domain-containing protein 1B OS=Mus musculus GN=Khdc1b PE=2 SV=1 - [KHD1B_MOUSE]                | 6.35  | 3  | 1  | 1  | 2   | 1.444 | 1.636 | 0.968 | 1.492 | 0.00    | 6.35  | 1  | 2   | 126  | 14.8  | 6.07 |
| E9QJV4   | Pre-mRNA-processing factor 39 OS=Mus musculus GN=Prpf39 PE=2 SV=1 -                                         | 5.56  | 3  | 3  | 3  | 6   | 2.332 | 1.319 | 1.438 | 1.492 | 14.22   | 5.56  | 5  | 6   | 665  | 77.9  | 5.44 |
| Q64430   | Copper-transporting ATPase 1 OS=Mus musculus GN=Atp7a PE=1 SV=3 - [ATP7A_MOUSE]                             | 6.17  | 2  | 5  | 7  | 18  | 0.962 | 1.159 | 0.990 | 1.493 | 49.04   | 6.17  | 10 | 18  | 1491 | 161.9 | 6.62 |
| Q9WUF3   | CASP8-associated protein 2 OS=Mus musculus GN=Casp8ap2 PE=1 SV=2 - [CBAP2_MOUSE]                            | 0.71  | 2  | 2  | 2  | 2   | 1.784 | 1.699 | 1.025 | 1.494 | 4.12    | 0.71  | 2  | 2   | 1962 | 219.0 | 6.67 |
| Q8BHW4   | Protein 4933430117Rik OS=Mus musculus GN=4933430117Rik PE=2 SV=1 -                                          | 5.25  | 1  | 2  | 2  | 2   | 1.304 | 1.197 | 1.985 | 1.494 | 2.18    | 5.25  | 2  | 2   | 495  | 56.2  | 8.46 |
| Q6XAS3   | MCG116991, isoform CRA_b OS=Mus musculus GN=Sox9 PE=2 SV=1 - [Q6XAS3_MOUSE]                                 | 14.12 | 1  | 1  | 1  | 1   | 1.223 | 1.111 | 1.471 | 1.495 | 4.04    | 14.12 | 1  | 1   | 170  | 20.0  | 5.10 |
| P15105   | Glutamine synthetase OS=Mus musculus GN=Glul PE=1 SV=6 - [GLNA_MOUSE]                                       | 58.98 | 3  | 20 | 20 | 646 | 0.924 | 1.049 | 1.328 | 1.495 | 2018.90 | 58.98 | 37 | 646 | 373  | 42.1  | 7.08 |
| Q2MV57-2 | Isoform 2 of Tectonic-2 OS=Mus musculus GN=Tctn2 - [TECT2_MOUSE]                                            | 5.35  | 3  | 3  | 3  | 4   | 2.618 | 1.207 | 1.228 | 1.497 | 11.21   | 5.35  | 4  | 4   | 579  | 63.9  | 5.91 |
| Q61330   | Contactin-2 OS=Mus musculus GN=Cntrn2 PE=2 SV=2 - [CNTN2_MOUSE]                                             | 30.58 | 1  | 25 | 25 | 114 | 1.183 | 0.681 | 1.257 | 1.497 | 379.68  | 30.58 | 42 | 114 | 1040 | 113.1 | 7.62 |
| P28661-2 | Isoform 2 of Septin-4 OS=Mus musculus GN=Sept4 - [SEPT4_MOUSE]                                              | 54.68 | 10 | 18 | 22 | 145 | 1.493 | 0.500 | 1.369 | 1.498 | 436.82  | 54.68 | 39 | 145 | 459  | 53.0  | 6.18 |

|          |                                                                                                                   |       |   |    |    |      |       |       |       |       |          |       |    |      |      |       |      |
|----------|-------------------------------------------------------------------------------------------------------------------|-------|---|----|----|------|-------|-------|-------|-------|----------|-------|----|------|------|-------|------|
| Q7TS17   | MCG1027552 OS=Mus musculus GN=Olfir285 PE=3 SV=1 - [Q7TS17_MOUSE]                                                 | 3.13  | 1 | 1  | 1  | 3    | 0.828 | 1.660 | 0.958 | 1.498 | 8.14     | 3.13  | 1  | 3    | 319  | 35.6  | 7.91 |
| Q8BMS4   | Hexaprenyldihydroxybenzoate methyltransferase, mitochondrial OS=Mus musculus GN=Cqo3 PE=2 SV=1 - [COQ3_MOUSE]     | 20.81 | 1 | 6  | 6  | 23   | 1.221 | 1.295 | 1.202 | 1.498 | 66.29    | 20.81 | 11 | 23   | 370  | 40.9  | 7.96 |
| Q505D7   | Optic atrophy 3 protein homolog OS=Mus musculus GN=Opa3 PE=1 SV=1 - [OPA3_MOUSE]                                  | 33.52 | 1 | 5  | 5  | 20   | 0.593 | 1.308 | 1.285 | 1.499 | 49.97    | 33.52 | 8  | 20   | 179  | 20.1  | 8.34 |
| Q60770   | Syntaxin-binding protein 3 OS=Mus musculus GN=Sxbp3 PE=1 SV=1 - [STXB3_MOUSE]                                     | 33.95 | 4 | 18 | 18 | 38   | 1.001 | 0.784 | 1.246 | 1.499 | 118.07   | 33.95 | 29 | 38   | 592  | 67.9  | 8.02 |
| Q9CRB8   | Mitochondrial fission process protein 1 OS=Mus musculus GN=Mtfn1 PE=1 SV=1 - [MTFP1_MOUSE]                        | 28.92 | 1 | 5  | 5  | 11   | 0.749 | 1.735 | 1.267 | 1.500 | 29.82    | 28.92 | 9  | 11   | 166  | 18.3  | 8.68 |
| P57016   | Ladinin-1 OS=Mus musculus GN=Lad1 PE=1 SV=1 - [LAD1_MOUSE]                                                        | 5.68  | 1 | 2  | 2  | 3    | 0.697 | 0.923 | 1.592 | 1.500 | 8.17     | 5.68  | 2  | 3    | 528  | 58.8  | 9.73 |
| Q6ZPV2-2 | Isoform 2 of DNA helicase INO80 OS=Mus musculus GN=Ino80 - [INO80_MOUSE]                                          | 1.29  | 2 | 2  | 2  | 2    | 0.673 | 1.281 | 1.172 | 1.500 | 2.61     | 1.29  | 2  | 2    | 1552 | 175.4 | 9.32 |
| AZAF19   | Histone-binding protein RBBP7 OS=Mus musculus GN=Rbbp7 PE=2 SV=1 - [AZAF19_MOUSE]                                 | 31.87 | 2 | 1  | 12 | 61   | 1.845 | 0.943 | 1.532 | 1.501 | 149.80   | 31.87 | 19 | 61   | 386  | 43.6  | 5.45 |
| Q9Z239   | Phospholemmann OS=Mus musculus GN=Fxyd1 PE=1 SV=1 - [PLM_MOUSE]                                                   | 8.70  | 1 | 1  | 1  | 1    | 0.698 | 0.587 | 1.067 | 1.502 | 2.85     | 8.70  | 1  | 1    | 92   | 10.3  | 8.54 |
| Q9CWL2   | Zinc finger protein castor homolog 1 OS=Mus musculus GN=Casz1 PE=2 SV=3 - [CASZ1_MOUSE]                           | 0.57  | 2 | 1  | 1  | 1    | 1.227 | 1.599 | 1.597 | 1.503 | 2.66     | 0.57  | 1  | 1    | 1761 | 191.1 | 7.14 |
| Q5F285   | Transmembrane protein 256 OS=Mus musculus GN=Tmem256 PE=2 SV=1 - [TM256_MOUSE]                                    | 24.78 | 1 | 1  | 1  | 4    | 0.450 | 1.303 | 1.252 | 1.503 | 27.32    | 24.78 | 2  | 4    | 113  | 11.6  | 8.94 |
| Q8CII2   | Cell division cycle protein 123 homolog OS=Mus musculus GN=Cdc123 PE=2 SV=2 - [CD123_MOUSE]                       | 11.31 | 2 | 3  | 4  | 16   | 1.848 | 2.211 | 1.878 | 1.505 | 39.08    | 11.31 | 7  | 16   | 336  | 38.8  | 4.67 |
| P59055-2 | Isoform 2 of Cysteine/serine-rich nuclear protein 3 OS=Mus musculus GN=Csmrp3 - [CSRN3_MOUSE]                     | 2.56  | 2 | 1  | 1  | 1    | 2.478 | 1.115 | 1.149 | 1.505 | 3.01     | 2.56  | 1  | 1    | 585  | 64.9  | 4.73 |
| Q911N2   | Zinc finger homeobox protein 4 OS=Mus musculus GN=Zfx4 PE=1 SV=1 - [ZFX4_MOUSE]                                   | 2.08  | 4 | 4  | 5  | 6    | 1.424 | 1.407 | 1.560 | 1.505 | 8.33     | 2.08  | 5  | 6    | 3550 | 392.1 | 6.44 |
| J3KMT3   | Protein Gm6882 OS=Mus musculus GN=Gm6882 PE=4 SV=1 - [J3KMT3_MOUSE]                                               | 10.86 | 1 | 2  | 2  | 3    | 0.844 | 1.791 | 1.832 | 1.505 | 5.18     | 10.86 | 3  | 3    | 313  | 35.4  | 6.83 |
| Q9DF9    | Tubulin beta-4A chain OS=Mus musculus GN=Tubb4a PE=1 SV=3 - [TB84A_MOUSE]                                         | 84.01 | 1 | 9  | 31 | 3928 | 0.962 | 1.155 | 1.502 | 1.506 | 10069.98 | 84.01 | 59 | 3928 | 444  | 49.6  | 4.88 |
| Q80WM4   | Hyaluronan and proteoglycan link protein 4 OS=Mus musculus GN=Hapln4 PE=2 SV=2 - [HPLN4_MOUSE]                    | 39.00 | 1 | 10 | 11 | 62   | 1.137 | 0.510 | 1.007 | 1.507 | 230.59   | 39.00 | 19 | 62   | 400  | 42.8  | 8.85 |
| Q9R069   | Basal cell adhesion molecule OS=Mus musculus GN=Bcam PE=2 SV=1 - [BCAM_MOUSE]                                     | 30.71 | 2 | 15 | 15 | 42   | 1.165 | 1.976 | 0.991 | 1.507 | 116.92   | 30.71 | 22 | 42   | 622  | 67.6  | 6.25 |
| P63141   | Potassium voltage-gated channel subfamily A member 2 OS=Mus musculus GN=Kcna2 PE=1 SV=1 - [KCN2_MOUSE]            | 23.85 | 2 | 5  | 9  | 58   | 0.733 | 0.550 | 1.335 | 1.507 | 209.19   | 23.85 | 16 | 58   | 499  | 56.7  | 4.86 |
| Q6DFV7-6 | Isoform 6 of Nuclear receptor coactivator 7 OS=Mus musculus GN=Ncoa7 -                                            | 21.38 | 4 | 1  | 3  | 4    | 1.668 | 1.492 | 1.589 | 1.508 | 12.50    | 21.38 | 4  | 4    | 159  | 18.4  | 6.64 |
| E9Q2N0   | Protein Cpsf4l OS=Mus musculus GN=Cpsf4l PE=2 SV=1 - [E9Q2N0_MOUSE]                                               | 4.29  | 1 | 1  | 1  | 2    | 1.903 | 1.544 | 1.661 | 1.510 | 6.12     | 4.29  | 1  | 2    | 280  | 31.8  | 8.54 |
| Q8R1M0   | UPF0361 protein C3orf37 homolog OS=Mus musculus PE=2 SV=1 - [CC037_MOUSE]                                         | 6.52  | 1 | 2  | 2  | 5    | 4.807 | 1.118 | 1.558 | 1.510 | 14.49    | 6.52  | 3  | 5    | 353  | 40.1  | 8.57 |
| E9PVX6   | Protein Mki67 OS=Mus musculus GN=Mki67 PE=2 SV=1 - [E9PVX6_MOUSE]                                                 | 1.07  | 1 | 3  | 3  | 3    | 3.173 | 2.041 | 3.846 | 1.510 | 5.00     | 1.07  | 3  | 3    | 3177 | 350.7 | 9.72 |
| Q7M6Y6   | Maestro heat-like repeat-containing protein family member 2B OS=Mus musculus GN=Mroh2b PE=1 SV=2 - [MROH2B_MOUSE] | 1.14  | 1 | 1  | 1  | 1    | 1.666 | 1.038 | 1.690 | 1.511 | 0.00     | 1.14  | 1  | 1    | 1581 | 180.4 | 6.61 |
| Q8K2C8   | Glycerol-3-phosphate acyltransferase 4 OS=Mus musculus GN=Agpat6 PE=2 SV=1 - [GPAT4_MOUSE]                        | 7.02  | 1 | 2  | 2  | 3    | 1.677 | 1.328 | 1.358 | 1.512 | 7.62     | 7.02  | 3  | 3    | 456  | 52.1  | 9.35 |

|          |                                                                                                                        |       |   |    |    |     |       |       |       |       |         |       |    |     |      |       |      |
|----------|------------------------------------------------------------------------------------------------------------------------|-------|---|----|----|-----|-------|-------|-------|-------|---------|-------|----|-----|------|-------|------|
| Q62264   | Thyroid hormone-inducible hepatic protein OS=Mus musculus GN=Thrsp PE=1 SV=1 - [THRSP_MOUSE]                           | 8.67  | 1 | 1  | 1  | 2   | 1.563 | 2.095 | 1.190 | 1.512 | 8.47    | 8.67  | 2  | 2   | 150  | 17.1  | 4.98 |
| E9QA29   | Protein Vmn2r100 OS=Mus musculus GN=Vmn2r100 PE=3 SV=1 - [E9QA29_MOUSE]                                                | 2.47  | 1 | 1  | 3  | 6   | 0.911 | 0.854 | 1.331 | 1.513 | 14.03   | 2.47  | 3  | 6   | 850  | 97.2  | 7.61 |
| Q9J394   | Sjogren syndrome nuclear autoantigen 1 homolog OS=Mus musculus GN=Ssna1 PE=1 SV=1 - [SSNA1_MOUSE]                      | 23.53 | 1 | 2  | 2  | 6   | 9.189 | 2.851 | 2.584 | 1.515 | 4.08    | 23.53 | 2  | 6   | 119  | 13.5  | 5.68 |
| P54869   | Hydroxymethylglutaryl-CoA synthase, mitochondrial OS=Mus musculus GN=Hmgcs2 PE=1 SV=2 - [HMGCS2_MOUSE]                 | 17.32 | 1 | 8  | 9  | 29  | 0.663 | 2.153 | 1.052 | 1.515 | 81.66   | 17.32 | 14 | 29  | 508  | 56.8  | 8.41 |
| Q8BH59   | Calcium-binding mitochondrial carrier protein Aralar1 OS=Mus musculus GN=Slc25a12 PE=1 SV=1 - [ALARA1_MOUSE]           | 70.90 | 1 | 33 | 39 | 443 | 0.743 | 1.245 | 1.200 | 1.516 | 1384.72 | 70.90 | 75 | 443 | 677  | 74.5  | 8.25 |
| Q8BH00   | Alddehyde dehydrogenase family 8 member A1 OS=Mus musculus GN=Aldh8a1 PE=1 SV=1 - [AL8A1_MOUSE]                        | 7.80  | 2 | 2  | 3  | 3   | 2.729 | 1.370 | 1.081 | 1.516 | 7.81    | 7.80  | 3  | 3   | 487  | 53.6  | 7.55 |
| P55099   | Tachykinin-3 OS=Mus musculus GN=Tac3 PE=2 SV=2 - [TKNK_MOUSE]                                                          | 11.21 | 1 | 1  | 1  | 17  | 1.325 | 1.001 | 1.119 | 1.516 | 51.07   | 11.21 | 2  | 17  | 116  | 12.7  | 8.15 |
| A8E0Y8   | Immunoglobulin superfamily member 2 OS=Mus musculus GN=Cd101 PE=2 SV=1 - [IGSF2_MOUSE]                                 | 0.77  | 1 | 1  | 1  | 3   | 2.287 | 0.352 | 1.779 | 1.517 | 6.26    | 0.77  | 1  | 3   | 1033 | 114.1 | 8.02 |
| Q8BJG4   | MOB kinase activator 3C OS=Mus musculus GN=Mob3c PE=2 SV=1 - [MOB3C_MOUSE]                                             | 6.48  | 1 | 1  | 2  | 2   | 1.861 | 1.428 | 1.087 | 1.518 | 3.54    | 6.48  | 2  | 2   | 216  | 25.5  | 8.44 |
| Q9DSR3   | Centrosomal protein of 83 kDa OS=Mus musculus GN=Ccdc41 PE=2 SV=2 - [CEPB3_MOUSE]                                      | 3.03  | 6 | 1  | 2  | 5   | 0.882 | 1.027 | 1.686 | 1.519 | 9.08    | 3.03  | 3  | 5   | 692  | 81.9  | 6.61 |
| Q99JZ7   | ERBB receptor feedback inhibitor 1 OS=Mus musculus GN=Errf1 PE=1 SV=1 - [ERRF1_MOUSE]                                  | 3.69  | 1 | 1  | 1  | 4   | 1.631 | 0.826 | 1.579 | 1.520 | 13.21   | 3.69  | 2  | 4   | 461  | 50.0  | 7.72 |
| P02772   | Alpha-fetoprotein OS=Mus musculus GN=Alp PE=2 SV=1 - [FETA_MOUSE]                                                      | 1.65  | 1 | 1  | 1  | 1   | 0.564 | 1.104 | 1.606 | 1.521 | 2.04    | 1.65  | 1  | 1   | 605  | 67.3  | 5.92 |
| Q91Y11-2 | Isoform 2 of Autophagy-related protein 13 OS=Mus musculus GN=Atg13 - [ATG13_MOUSE]                                     | 9.19  | 2 | 4  | 4  | 10  | 1.200 | 1.471 | 1.334 | 1.522 | 24.51   | 9.19  | 6  | 10  | 479  | 52.6  | 5.16 |
| Q8BJ56-3 | Isoform 3 of Patatin-like phospholipase domain-containing protein 2 OS=Mus musculus GN=Pppla2 - [PPPLA2_MOUSE]         | 10.00 | 5 | 3  | 3  | 6   | 2.099 | 0.863 | 1.492 | 1.523 | 18.39   | 10.00 | 4  | 6   | 430  | 47.8  | 6.09 |
| P03995-2 | Isoform 2 of Glial fibrillary acidic protein OS=Mus musculus GN=Gfap - [GFAP_MOUSE]                                    | 78.04 | 4 | 1  | 35 | 506 | 1.885 | 1.595 | 0.971 | 1.523 | 1418.92 | 78.04 | 66 | 506 | 428  | 49.3  | 5.50 |
| P17809   | Solute carrier family 2, facilitated glucose transporter member 1 OS=Mus musculus GN=Slc2a1 PE=1 SV=4 - [SLC2A1_MOUSE] | 11.18 | 1 | 7  | 7  | 40  | 1.060 | 0.892 | 1.224 | 1.524 | 110.52  | 11.18 | 11 | 40  | 492  | 53.9  | 8.87 |
| Q02013   | Aquaporin-1 OS=Mus musculus GN=Aqp1 PE=1 SV=3 - [AQP1_MOUSE]                                                           | 3.35  | 1 | 1  | 1  | 4   | 1.782 | 2.721 | 0.492 | 1.524 | 10.71   | 3.35  | 2  | 4   | 269  | 28.8  | 7.43 |
| Q8VED9   | Galectin-related protein OS=Mus musculus GN=Lgals1 PE=1 SV=1 - [LEGL_MOUSE]                                            | 62.79 | 1 | 6  | 9  | 75  | 0.828 | 1.699 | 1.642 | 1.525 | 219.87  | 62.79 | 18 | 75  | 172  | 18.9  | 5.35 |
| Q8VCB3   | Glycogen [starch] synthase, liver OS=Mus musculus GN=Gys2 PE=1 SV=2 - [GYS2_MOUSE]                                     | 2.56  | 1 | 1  | 1  | 1   | 1.524 | 2.682 | 1.032 | 1.525 | 3.41    | 2.56  | 1  | 1   | 704  | 80.8  | 6.89 |
| Q00519   | Xanthine dehydrogenase/oxidase OS=Mus musculus GN=Xdh PE=1 SV=5 - [XDH_MOUSE]                                          | 2.70  | 2 | 2  | 4  | 10  | 2.019 | 1.868 | 1.570 | 1.527 | 20.65   | 2.70  | 7  | 10  | 1335 | 146.5 | 7.56 |
| Q99LH1   | Nucleolar GTP-binding protein 2 OS=Mus musculus GN=Gnl2 PE=2 SV=2 - [NOG2_MOUSE]                                       | 4.26  | 2 | 2  | 2  | 3   | 0.781 | 1.165 | 1.159 | 1.528 | 9.63    | 4.26  | 3  | 3   | 728  | 83.3  | 9.20 |
| Q5GAMB   | Probable inactive ribonuclease-like protein 12 OS=Mus musculus GN=Rnase12 PE=2 SV=1 - [RNS12_MOUSE]                    | 4.83  | 1 | 1  | 1  | 1   | 1.470 | 1.170 | 1.034 | 1.529 | 0.00    | 4.83  | 1  | 1   | 145  | 16.9  | 6.51 |
| Q8CHK2   | Relaxin-3 OS=Mus musculus GN=Rln3 PE=2 SV=1 - [REL3_MOUSE]                                                             | 14.18 | 1 | 2  | 2  | 6   | 1.088 | 0.416 | 1.270 | 1.530 | 13.45   | 14.18 | 3  | 6   | 141  | 14.9  | 5.91 |
| E9QNK5   | Corticotropin-releasing factor receptor 2 OS=Mus musculus GN=Crrh2 PE=2 SV=1 - [E9QNK5_MOUSE]                          | 2.44  | 4 | 1  | 1  | 3   | 0.866 | 1.489 | 2.191 | 1.531 | 3.89    | 2.44  | 1  | 3   | 410  | 47.5  | 7.40 |

|          |                                                                                                                               |       |   |    |    |      |       |       |       |       |         |       |    |      |      |       |       |
|----------|-------------------------------------------------------------------------------------------------------------------------------|-------|---|----|----|------|-------|-------|-------|-------|---------|-------|----|------|------|-------|-------|
| P43006-3 | Isoform Glt-1B of Excitatory amino acid transporter 2 OS=Mus musculus GN=Slc1a2 - [EAA2_MOUSE]                                | 32.08 | 5 | 1  | 18 | 685  | 1.426 | 1.299 | 1.312 | 1.532 | 2146.04 | 32.08 | 29 | 685  | 558  | 60.6  | 6.68  |
| Q62433   | Protein NDRG1 OS=Mus musculus GN=Ndrgr1 PE=1 SV=1 - [NDRG1_MOUSE]                                                             | 45.18 | 9 | 8  | 12 | 130  | 1.071 | 0.757 | 1.145 | 1.534 | 396.50  | 45.18 | 23 | 130  | 394  | 43.0  | 6.10  |
| Q8K0M7   | Protein D630039A03Rik OS=Mus musculus GN=D630039A03Rik PE=2 SV=2 - [Q8K0M7_MOUSE]                                             | 6.78  | 1 | 1  | 1  | 3    | 1.360 | 0.906 | 1.091 | 1.534 | 0.00    | 6.78  | 1  | 3    | 236  | 26.3  | 8.02  |
| Q3V384   | Lactation elevated protein 1 OS=Mus musculus GN=Lace1 PE=2 SV=1 - [LACE1_MOUSE]                                               | 21.88 | 3 | 8  | 8  | 21   | 0.840 | 0.916 | 1.264 | 1.536 | 65.86   | 21.88 | 15 | 21   | 480  | 54.3  | 8.03  |
| Q9JLJ2   | 4-trimethylaminobutyraldehyde dehydrogenase OS=Mus musculus GN=Aldh9a1 PE=1 SV=1 - [ALDH9A1_MOUSE]                            | 48.79 | 2 | 22 | 23 | 110  | 0.982 | 1.138 | 1.025 | 1.537 | 341.10  | 48.79 | 39 | 110  | 494  | 53.5  | 6.98  |
| Q8CBX9   | Basic immunoglobulin-like variable motif-containing protein OS=Mus musculus GN=Bivm PE=2 SV=1 - [BIVM_MOUSE]                  | 4.98  | 1 | 2  | 2  | 2    | 1.320 | 2.009 | 1.450 | 1.539 | 5.22    | 4.98  | 2  | 2    | 502  | 56.6  | 8.81  |
| Q3USL1   | Kelch domain-containing protein 9 OS=Mus musculus GN=Kihdc9 PE=2 SV=1 -                                                       | 4.57  | 1 | 1  | 1  | 9    | 0.850 | 1.100 | 0.856 | 1.539 | 17.91   | 4.57  | 2  | 9    | 350  | 38.2  | 8.50  |
| Q07076   | Annexin A7 OS=Mus musculus GN=Anxa7 PE=2 SV=2 - [ANXA7_MOUSE]                                                                 | 32.83 | 1 | 15 | 15 | 104  | 0.864 | 2.479 | 1.474 | 1.543 | 320.34  | 32.83 | 27 | 104  | 463  | 49.9  | 6.18  |
| A2A880   | Sorting nexin-11 (Fragment) OS=Mus musculus GN=Snx11 PE=2 SV=1 - [A2A880_MOUSE]                                               | 6.60  | 2 | 1  | 1  | 2    | 1.638 | 1.283 | 1.927 | 1.545 | 2.61    | 6.60  | 2  | 2    | 197  | 22.4  | 8.09  |
| Q9JMA2   | Queuine tRNA-ribosyltransferase OS=Mus musculus GN=Qtrt1 PE=1 SV=2 - [TGT_MOUSE]                                              | 19.35 | 1 | 5  | 6  | 18   | 1.223 | 1.419 | 1.719 | 1.546 | 49.08   | 19.35 | 9  | 18   | 403  | 44.1  | 7.68  |
| O08966   | Solute carrier family 22 member 1 OS=Mus musculus GN=Slc22a1 PE=2 SV=2 -                                                      | 6.83  | 3 | 3  | 3  | 4    | 1.696 | 1.185 | 1.268 | 1.547 | 5.22    | 6.83  | 3  | 4    | 556  | 61.5  | 6.67  |
| Q8VD73   | Potassium voltage-gated channel, shaker-related subfamily, beta member 3 OS=Mus musculus GN=Kcnab3 PE=2 SV=1 - [Q8VD73_MOUSE] | 19.80 | 2 | 4  | 6  | 14   | 0.807 | 0.461 | 1.106 | 1.551 | 43.52   | 19.80 | 10 | 14   | 404  | 43.8  | 8.54  |
| Q61016   | Guanine nucleotide-binding protein G(T)(G(S))(G(O)) subunit gamma-7 OS=Mus musculus GN=Gng7 PE=2 SV=2 - [GNG7_MOUSE]          | 67.65 | 3 | 5  | 6  | 29   | 0.938 | 1.988 | 3.340 | 1.552 | 75.26   | 67.65 | 10 | 29   | 68   | 7.5   | 8.51  |
| Q6NV92   | Protein Zfp941 OS=Mus musculus GN=Zfp941 PE=2 SV=1 - [Q6NV92_MOUSE]                                                           | 2.09  | 2 | 1  | 1  | 4    | 0.884 | 1.180 | 1.002 | 1.552 | 11.32   | 2.09  | 2  | 4    | 671  | 75.9  | 9.32  |
| F6V5V4   | Protein Gm11397 OS=Mus musculus GN=Gm11397 PE=3 SV=1 - [F6V5V4_MOUSE]                                                         | 10.61 | 4 | 1  | 2  | 8    | 1.990 | 0.703 | 2.475 | 1.552 | 2.44    | 10.61 | 3  | 8    | 377  | 43.0  | 5.87  |
| D3Z2D7   | Phenazine biosynthesis-like domain-containing protein 2 (Fragment) OS=Mus musculus GN=Pbd2 PE=2 SV=1 - [PBD2_MOUSE]           | 7.43  | 2 | 1  | 1  | 1    | 2.157 | 1.209 | 1.374 | 1.552 | 2.67    | 7.43  | 1  | 1    | 175  | 19.9  | 10.48 |
| Q64339   | Ubiquitin-like protein ISG15 OS=Mus musculus GN=Isg15 PE=1 SV=4 - [ISG15_MOUSE]                                               | 9.32  | 1 | 2  | 2  | 6    | 1.751 | 1.900 | 0.809 | 1.552 | 12.19   | 9.32  | 3  | 6    | 161  | 17.9  | 7.90  |
| Q99LB7   | Sarcosine dehydrogenase, mitochondrial OS=Mus musculus GN=Sardh PE=1 SV=1 - [SARDH_MOUSE]                                     | 17.52 | 3 | 12 | 12 | 36   | 1.083 | 0.725 | 1.083 | 1.552 | 103.26  | 17.52 | 22 | 36   | 919  | 101.6 | 6.74  |
| O70209   | PDZ and LIM domain protein 3 OS=Mus musculus GN=Pdlm3 PE=1 SV=1 -                                                             | 28.48 | 1 | 5  | 5  | 15   | 1.046 | 3.816 | 1.469 | 1.553 | 55.87   | 28.48 | 9  | 15   | 316  | 34.3  | 7.91  |
| P46660   | Alpha-intermexin OS=Mus musculus GN=Ina PE=1 SV=2 - [AINX_MOUSE]                                                              | 67.06 | 1 | 31 | 35 | 1067 | 1.678 | 0.377 | 1.787 | 1.554 | 2981.82 | 67.06 | 68 | 1067 | 504  | 55.7  | 5.27  |
| Q99PW8   | Kinesin-like protein KIF17 OS=Mus musculus GN=Kif17 PE=1 SV=1 - [KIF17_MOUSE]                                                 | 4.43  | 4 | 2  | 3  | 4    | 1.521 | 0.927 | 1.750 | 1.556 | 5.85    | 4.43  | 4  | 4    | 1038 | 116.3 | 5.26  |
| Q8BH86   | UPF0317 protein C14orf159 homolog, mitochondrial OS=Mus musculus PE=2 SV=1 - [CN159_MOUSE]                                    | 25.77 | 4 | 14 | 14 | 40   | 1.362 | 1.317 | 1.311 | 1.557 | 124.96  | 25.77 | 26 | 40   | 617  | 66.3  | 7.09  |
| O55123   | Stromelysin-2 OS=Mus musculus GN=Mmp10 PE=2 SV=1 - [MMP10_MOUSE]                                                              | 2.73  | 3 | 1  | 1  | 4    | 1.553 | 1.195 | 1.470 | 1.558 | 1.90    | 2.73  | 1  | 4    | 476  | 53.9  | 6.37  |
| Q7TN89   | GTPase Eras OS=Mus musculus GN=Eras PE=1 SV=1 - [RASE_MOUSE]                                                                  | 3.08  | 1 | 1  | 1  | 1    | 0.349 | 2.188 | 1.431 | 1.562 | 2.56    | 3.08  | 1  | 1    | 227  | 24.3  | 6.83  |
| Q6ZQM0-4 | Isoform 4 of E3 ubiquitin-protein ligase rff1ylin OS=Mus musculus GN=Rff1 - [RFFL_MOUSE]                                      | 6.48  | 5 | 1  | 1  | 3    | 2.659 | 0.944 | 1.230 | 1.562 | 6.12    | 6.48  | 2  | 3    | 293  | 33.0  | 5.83  |

|          |                                                                                                                            |       |   |    |    |    |        |       |       |       |        |       |    |    |      |       |       |
|----------|----------------------------------------------------------------------------------------------------------------------------|-------|---|----|----|----|--------|-------|-------|-------|--------|-------|----|----|------|-------|-------|
| Q80WM5   | Hyaluronan and proteoglycan link protein 3 OS=Mus musculus GN=Hapln3 PE=2 SV=3 - [HPLN3_MOUSE]                             | 16.99 | 1 | 5  | 5  | 13 | 1.189  | 1.337 | 1.328 | 1.564 | 26.80  | 16.99 | 8  | 13 | 359  | 40.7  | 6.52  |
| P28666   | Murineoglobulin-2 OS=Mus musculus GN=Mug2 PE=2 SV=2 - [MUG2_MOUSE]                                                         | 13.58 | 1 | 1  | 17 | 55 | 0.657  | 1.494 | 1.063 | 1.566 | 157.69 | 13.58 | 24 | 55 | 1451 | 162.3 | 6.74  |
| P34914   | Bifunctional epoxide hydrolase 2 OS=Mus musculus GN=Ephw2 PE=1 SV=2 - [HYES_MOUSE]                                         | 38.27 | 2 | 15 | 15 | 47 | 0.975  | 1.729 | 1.702 | 1.567 | 148.33 | 38.27 | 27 | 47 | 554  | 62.5  | 6.19  |
| E9PYP1   | Protein Ces1a OS=Mus musculus GN=Ces1a PE=4 SV=1 - [E9PYP1_MOUSE]                                                          | 4.26  | 1 | 1  | 2  | 6  | 6.271  | 5.555 | 1.579 | 1.567 | 12.88  | 4.26  | 3  | 6  | 563  | 61.7  | 5.26  |
| Q9CZT5   | Vasorin OS=Mus musculus GN=Vasn PE=2 SV=2 - [VASN_MOUSE]                                                                   | 6.09  | 1 | 2  | 2  | 3  | 1.510  | 0.752 | 1.605 | 1.569 | 7.60   | 6.09  | 3  | 3  | 673  | 72.2  | 7.08  |
| P61372   | Insulin gene enhancer protein ISL-1 OS=Mus musculus GN=Isl1 PE=1 SV=1 - [ISL1_MOUSE]                                       | 5.16  | 1 | 1  | 1  | 4  | 19.943 | 5.821 | 2.550 | 1.570 | 6.49   | 5.16  | 1  | 4  | 349  | 39.0  | 8.28  |
| P85094   | Isochorismatase domain-containing protein 2A, mitochondrial OS=Mus musculus GN=Isoc2a PE=2 SV=1 - [ISOC2A_MOUSE]           | 58.74 | 1 | 7  | 7  | 20 | 1.160  | 1.579 | 1.143 | 1.571 | 71.82  | 58.74 | 13 | 20 | 206  | 22.4  | 8.02  |
| Q9Z2E4   | Protein phosphatase 1 regulatory subunit 17 OS=Mus musculus GN=Ppp1r17 PE=1 SV=1 - [PPR17_MOUSE]                           | 11.32 | 1 | 1  | 1  | 2  | 1.763  | 1.324 | 1.545 | 1.573 | 5.37   | 11.32 | 2  | 2  | 159  | 17.8  | 6.23  |
| Q61QY5-2 | Isoform 2 of Centrosomal protein of 70 kDa OS=Mus musculus GN=Cep70 - [CEP70_MOUSE]                                        | 3.98  | 2 | 2  | 2  | 2  | 1.925  | 2.304 | 0.513 | 1.573 | 4.37   | 3.98  | 2  | 2  | 578  | 66.8  | 6.51  |
| F8VPN7   | Dedicator of cytokinesis protein 9 OS=Mus musculus GN=Dock9 PE=2 SV=1 - [F8VPN7_MOUSE]                                     | 19.92 | 2 | 1  | 37 | 96 | 0.889  | 1.124 | 1.257 | 1.573 | 254.89 | 19.92 | 60 | 96 | 2113 | 241.2 | 7.43  |
| Q9D3A8   | Carboxyl-terminal PDZ ligand of neuronal nitric oxide synthase protein OS=Mus musculus GN=Nos1ap PE=1 SV=3 - [CAPON_MOUSE] | 6.76  | 4 | 4  | 4  | 6  | 0.856  | 2.033 | 1.268 | 1.574 | 17.69  | 6.76  | 5  | 6  | 503  | 55.8  | 6.09  |
| F6RVG2   | Suppressor of cytokine signaling 2 (Fragment) OS=Mus musculus GN=Socs2 PE=4 SV=1 - [F6RVG2_MOUSE]                          | 2.99  | 1 | 1  | 1  | 1  | 2.217  | 2.363 | 2.129 | 1.575 | 2.51   | 2.99  | 1  | 1  | 201  | 22.9  | 8.92  |
| B1AS67   | Pleckstrin homology domain-containing family G member 5 OS=Mus musculus GN=Plekhg5 PE=2 SV=1 - [PLEKHG5_MOUSE]             | 4.62  | 5 | 3  | 4  | 9  | 0.947  | 1.064 | 1.719 | 1.578 | 18.48  | 4.62  | 5  | 9  | 1060 | 117.8 | 6.83  |
| Q8C753-4 | Uncharacterized protein KIAA0556 OS=Mus musculus GN=Kiaa0556 - [K0556_MOUSE]                                               | 2.61  | 6 | 3  | 3  | 3  | 1.762  | 1.357 | 1.360 | 1.579 | 5.86   | 2.61  | 3  | 3  | 1612 | 179.2 | 5.27  |
| Q9ER56-2 | Isoform 2 of Calpain-12 OS=Mus musculus GN=Capn12 - [CAN12_MOUSE]                                                          | 2.45  | 5 | 1  | 1  | 6  | 4.653  | 0.193 | 2.137 | 1.579 | 0.00   | 2.45  | 1  | 6  | 449  | 50.4  | 7.62  |
| Q61102   | ATP-binding cassette sub-family B member 7, mitochondrial OS=Mus musculus GN=Abcb7 PE=1 SV=3 - [ABCB7_MOUSE]               | 37.63 | 1 | 23 | 24 | 75 | 0.812  | 1.206 | 1.455 | 1.580 | 223.96 | 37.63 | 41 | 75 | 752  | 82.5  | 9.32  |
| Q3U213-2 | Isoform 2 of Protein SERAC1 OS=Mus musculus GN=Serac1 - [SRAC1_MOUSE]                                                      | 6.57  | 3 | 4  | 4  | 5  | 0.878  | 0.761 | 1.470 | 1.581 | 10.04  | 6.57  | 5  | 5  | 624  | 70.6  | 7.53  |
| Q6X7S9   | EP300-interacting inhibitor of differentiation 2 OS=Mus musculus GN=Eid2 PE=1 SV=1 - [EID2_MOUSE]                          | 9.75  | 1 | 2  | 2  | 4  | 1.759  | 0.641 | 2.318 | 1.581 | 11.77  | 9.75  | 4  | 4  | 236  | 25.3  | 10.37 |
| F6XLV1   | Protein E030010N08Rik (Fragment) OS=Mus musculus GN=E030010N08Rik PE=4 SV=1 - [F6XLV1_MOUSE]                               | 15.36 | 1 | 3  | 4  | 7  | 0.540  | 0.973 | 1.115 | 1.583 | 17.91  | 15.36 | 7  | 7  | 306  | 34.7  | 9.95  |
| P57725   | SAM domain-containing protein SAMSN-1 OS=Mus musculus GN=Samsn1 PE=1 SV=2 - [SAMN1_MOUSE]                                  | 8.33  | 2 | 2  | 2  | 2  | 3.672  | 4.490 | 1.636 | 1.583 | 2.38   | 8.33  | 2  | 2  | 372  | 41.6  | 5.25  |
| O88531   | Palmitoyl-protein thioesterase 1 OS=Mus musculus GN=Ppt1 PE=2 SV=2 - [PPT1_MOUSE]                                          | 34.31 | 3 | 8  | 9  | 51 | 0.877  | 1.920 | 1.300 | 1.584 | 179.93 | 34.31 | 16 | 51 | 306  | 34.5  | 8.00  |
| D3YWJ0   | Protein Nuggc OS=Mus musculus GN=Nuggc PE=4 SV=1 - [D3YWJ0_MOUSE]                                                          | 8.17  | 2 | 3  | 3  | 4  | 4.478  | 2.128 | 0.896 | 1.586 | 2.71   | 8.17  | 3  | 4  | 796  | 91.2  | 8.95  |
| P97799   | Neurensin-1 OS=Mus musculus GN=Nrsn1 PE=2 SV=1 - [NRSN1_MOUSE]                                                             | 11.73 | 1 | 3  | 3  | 5  | 0.714  | 1.044 | 0.838 | 1.587 | 11.88  | 11.73 | 5  | 5  | 196  | 21.6  | 7.99  |
| P58468   | Protein FAM207A OS=Mus musculus GN=Fam207a PE=1 SV=1 - [F207A_MOUSE]                                                       | 23.74 | 1 | 4  | 4  | 7  | 1.549  | 1.698 | 1.192 | 1.589 | 22.38  | 23.74 | 7  | 7  | 219  | 24.8  | 11.00 |

|          |                                                                                                      |       |    |    |    |     |       |       |       |       |        |       |    |     |      |       |       |
|----------|------------------------------------------------------------------------------------------------------|-------|----|----|----|-----|-------|-------|-------|-------|--------|-------|----|-----|------|-------|-------|
| Q9Z0F7   | Gamma-synuclein OS=Mus musculus GN=Sncg PE=1 SV=1 - [SYUG_MOUSE]                                     | 64.23 | 1  | 9  | 9  | 112 | 2.427 | 0.599 | 1.259 | 1.591 | 364.21 | 64.23 | 16 | 112 | 123  | 13.2  | 4.65  |
| Q3U5Q7   | UMP-CMP kinase 2, mitochondrial OS=Mus musculus GN=Cmpk2 PE=2 SV=2 -                                 | 41.61 | 4  | 15 | 16 | 45  | 0.870 | 1.091 | 1.026 | 1.598 | 135.44 | 41.61 | 27 | 45  | 447  | 50.0  | 7.27  |
| P97459   | Neuronal PAS domain-containing protein 1 OS=Mus musculus GN=Npas1 PE=1 SV=1 - [NPAS1_MOUSE]          | 2.19  | 1  | 1  | 1  | 1   | 4.220 | 1.336 | 2.692 | 1.598 | 2.23   | 2.19  | 1  | 1   | 594  | 63.7  | 8.63  |
| Q3UTJ2   | Sorbin and SH3 domain-containing protein 2 OS=Mus musculus GN=Sorbs2 PE=1 SV=2 - [SRBS2_MOUSE]       | 42.03 | 12 | 1  | 40 | 150 | 0.722 | 2.105 | 1.549 | 1.599 | 445.58 | 42.03 | 71 | 150 | 1180 | 132.3 | 8.53  |
| Q8BYH7   | TBC1 domain family member 17 OS=Mus musculus GN=Tbc1d17 PE=2 SV=2 -                                  | 11.78 | 2  | 6  | 7  | 17  | 0.940 | 1.213 | 1.207 | 1.600 | 48.18  | 11.78 | 11 | 17  | 645  | 72.8  | 5.25  |
| Q924Y0   | Gamma-butyrobetaine dioxygenase OS=Mus musculus GN=Bbox1 PE=2 SV=1 - [BODG_MOUSE]                    | 12.66 | 1  | 4  | 4  | 12  | 1.762 | 0.719 | 0.866 | 1.603 | 28.75  | 12.66 | 7  | 12  | 387  | 44.7  | 6.92  |
| Q9D4K7   | Coiled-coil domain-containing protein 105 OS=Mus musculus GN=Ccdc105 PE=2 SV=3 - [CC105_MOUSE]       | 6.21  | 1  | 3  | 3  | 3   | 1.758 | 2.363 | 1.043 | 1.605 | 2.40   | 6.21  | 3  | 3   | 499  | 57.3  | 9.82  |
| Q9CQR4   | Acyl-coenzyme A thioesterase 13 OS=Mus musculus GN=Acot13 PE=1 SV=1 -                                | 53.57 | 1  | 7  | 7  | 30  | 0.589 | 1.208 | 1.464 | 1.607 | 99.05  | 53.57 | 11 | 30  | 140  | 15.2  | 8.82  |
| Q8K2P2   | Protein FAM83A OS=Mus musculus GN=Fam83a PE=2 SV=2 - [FAM83A_MOUSE]                                  | 3.21  | 1  | 1  | 1  | 1   | 0.789 | 0.796 | 1.136 | 1.608 | 2.00   | 3.21  | 1  | 1   | 436  | 48.2  | 8.63  |
| P82343-2 | Isoform 2 of N-acetylglucosamine 2-epimerase OS=Mus musculus GN=Renbp -                              | 5.05  | 3  | 3  | 3  | 9   | 0.856 | 1.848 | 0.946 | 1.608 | 15.96  | 5.05  | 4  | 9   | 416  | 48.0  | 5.87  |
| Q3UW53   | Protein Niban OS=Mus musculus GN=Fam129a PE=1 SV=2 - [NIBAN_MOUSE]                                   | 13.71 | 3  | 7  | 7  | 10  | 1.449 | 1.394 | 1.188 | 1.608 | 25.86  | 13.71 | 9  | 10  | 926  | 102.6 | 4.78  |
| Q99L20   | Glutathione S-transferase theta 3 OS=Mus musculus GN=Gtt3 PE=2 SV=1 - [Q99L20_MOUSE]                 | 36.10 | 4  | 6  | 8  | 33  | 0.490 | 0.884 | 0.727 | 1.609 | 114.68 | 36.10 | 14 | 33  | 241  | 27.4  | 7.74  |
| Q80W22   | Threonine synthase-like 2 OS=Mus musculus GN=Thnsl2 PE=2 SV=1 - [THNS2_MOUSE]                        | 15.94 | 2  | 8  | 8  | 18  | 1.206 | 1.460 | 1.218 | 1.609 | 55.97  | 15.94 | 15 | 18  | 483  | 54.2  | 6.39  |
| Q07456   | Protein AMBP OS=Mus musculus GN=Ambp PE=1 SV=2 - [AMBP_MOUSE]                                        | 14.90 | 1  | 4  | 4  | 12  | 3.342 | 2.340 | 0.878 | 1.612 | 38.50  | 14.90 | 8  | 12  | 349  | 39.0  | 6.32  |
| Q71B07   | Probable C-mannosyltransferase DPY19L3 OS=Mus musculus GN=Dpy19l3 PE=2 SV=2 - [DPY19L3_MOUSE]        | 3.63  | 1  | 3  | 3  | 7   | 0.642 | 1.085 | 1.206 | 1.614 | 21.96  | 3.63  | 6  | 7   | 716  | 82.9  | 8.75  |
| B2RPV6   | Multimerin-1 OS=Mus musculus GN=Mmm1 PE=2 SV=2 - [MMRN1_MOUSE]                                       | 4.63  | 3  | 2  | 4  | 17  | 0.769 | 0.892 | 1.580 | 1.616 | 18.79  | 4.63  | 5  | 17  | 1210 | 136.0 | 7.71  |
| D3YW52   | Alpha-2-macroglobulin OS=Mus musculus GN=Pzp PE=2 SV=1 - [D3YW52_MOUSE]                              | 36.70 | 3  | 42 | 45 | 220 | 3.034 | 3.079 | 0.802 | 1.617 | 618.30 | 36.70 | 80 | 220 | 1507 | 167.2 | 6.83  |
| Q5IRJ6   | Zinc transporter 9 OS=Mus musculus GN=Sk30a9 PE=1 SV=2 - [ZNT9_MOUSE]                                | 26.46 | 3  | 14 | 14 | 38  | 0.892 | 1.116 | 1.289 | 1.617 | 97.17  | 26.46 | 23 | 38  | 567  | 62.8  | 8.69  |
| G3X919   | T-box transcription factor TBX18 OS=Mus musculus GN=Tbx18 PE=4 SV=1 - [G3X919_MOUSE]                 | 5.22  | 2  | 2  | 2  | 2   | 1.487 | 2.062 | 1.608 | 1.618 | 2.48   | 5.22  | 2  | 2   | 613  | 65.4  | 8.43  |
| Q8R3P6   | von Willebrand factor A domain-containing protein 9 OS=Mus musculus GN=Vwa9 PE=2 SV=1 - [VWA9_MOUSE] | 11.65 | 1  | 3  | 4  | 5   | 0.837 | 1.439 | 1.301 | 1.619 | 6.40   | 11.65 | 5  | 5   | 515  | 57.2  | 5.17  |
| Q8BH35   | Complement component C8 beta chain OS=Mus musculus GN=C8b PE=1 SV=1 - [CO8B_MOUSE]                   | 10.19 | 2  | 4  | 4  | 11  | 1.858 | 1.956 | 1.136 | 1.619 | 10.42  | 10.19 | 6  | 11  | 589  | 66.2  | 7.77  |
| Q3UHB8   | Coiled-coil domain-containing protein 177 OS=Mus musculus GN=Ccdc177 PE=1 SV=1 - [CC177_MOUSE]       | 23.09 | 1  | 12 | 12 | 27  | 0.954 | 1.330 | 1.940 | 1.623 | 70.26  | 23.09 | 20 | 27  | 706  | 79.8  | 10.80 |
| P40201   | Chromodomain-helicase-DNA-binding protein 1 OS=Mus musculus GN=Chd1 PE=1 SV=3 - [CHD1_MOUSE]         | 1.81  | 3  | 2  | 3  | 5   | 1.248 | 0.795 | 1.354 | 1.623 | 6.97   | 1.81  | 4  | 5   | 1711 | 196.3 | 7.37  |
| Q64442   | Sorbitol dehydrogenase OS=Mus musculus GN=Sord PE=1 SV=3 - [DHSO_MOUSE]                              | 49.30 | 1  | 15 | 15 | 49  | 1.228 | 1.130 | 1.254 | 1.625 | 156.21 | 49.30 | 26 | 49  | 357  | 38.2  | 7.02  |
| P62965   | Cellular retinoic acid-binding protein 1 OS=Mus musculus GN=Crabp1 PE=1 SV=2 -                       | 57.66 | 1  | 6  | 7  | 15  | 1.614 | 1.246 | 1.123 | 1.625 | 47.83  | 57.66 | 11 | 15  | 137  | 15.6  | 5.38  |
| O09116   | Small proline-rich protein 3 OS=Mus musculus GN=Sprr3 PE=2 SV=1 - [SPRR3_MOUSE]                      | 5.88  | 1  | 1  | 1  | 3   | 1.244 | 0.390 | 1.873 | 1.626 | 2.27   | 5.88  | 1  | 3   | 238  | 25.2  | 5.07  |

|          |                                                                                                                                                               |       |   |    |    |      |       |       |       |       |         |       |    |      |      |       |      |
|----------|---------------------------------------------------------------------------------------------------------------------------------------------------------------|-------|---|----|----|------|-------|-------|-------|-------|---------|-------|----|------|------|-------|------|
| Q91XH5   | Sepiapterin reductase<br>OS=Mus musculus<br>GN=Spr PE=2 SV=1 -<br>[Q91XH5_MOUSE]                                                                              | 66.03 | 5 | 15 | 15 | 67   | 0.967 | 1.427 | 1.242 | 1.626 | 217.71  | 66.03 | 23 | 67   | 262  | 27.9  | 6.21 |
| P10284   | Homeobox protein Hox-B4<br>OS=Mus musculus<br>GN=Hoxb4 PE=2 SV=1 -<br>[HXB4_MOUSE]                                                                            | 6.80  | 1 | 1  | 1  | 1    | 0.924 | 0.658 | 0.977 | 1.627 | 3.44    | 6.80  | 1  | 1    | 250  | 27.5  | 9.77 |
| Q8VDS8-3 | Isoform 3 of Syntaxin-18<br>OS=Mus musculus<br>GN=Sbx18 -<br>[STX18_MOUSE]                                                                                    | 13.96 | 4 | 4  | 4  | 10   | 1.289 | 1.242 | 0.902 | 1.628 | 29.24   | 13.96 | 6  | 10   | 308  | 35.2  | 5.87 |
| A2AGB2   | Uncharacterized protein<br>C1orf87 homolog OS=Mus<br>musculus GN=Gm12695<br>PE=4 SV=1 -<br>[CA087_MOUSE]                                                      | 1.28  | 1 | 1  | 1  | 7    | 0.832 | 1.150 | 1.228 | 1.629 | 13.99   | 1.28  | 2  | 7    | 545  | 62.4  | 9.31 |
| Q9CS00   | Cactin OS=Mus musculus<br>GN=Cactin PE=1 SV=2 -<br>[CATIN_MOUSE]                                                                                              | 1.17  | 1 | 1  | 1  | 1    | 1.418 | 0.832 | 1.172 | 1.633 | 2.82    | 1.17  | 1  | 1    | 772  | 90.6  | 9.79 |
| P03911   | NADH-ubiquinone<br>oxidoreductase chain 4<br>OS=Mus musculus<br>GN=Mtd4 PE=1 SV=1 -<br>[NU4M_MOUSE]                                                           | 4.79  | 1 | 2  | 2  | 13   | 0.859 | 0.964 | 1.493 | 1.633 | 43.29   | 4.79  | 4  | 13   | 459  | 51.8  | 9.38 |
| Q91WD9   | Secretagogin OS=Mus<br>musculus GN=Scgn PE=2<br>SV=1 - [SEGN_MOUSE]                                                                                           | 11.96 | 1 | 3  | 3  | 8    | 0.824 | 0.670 | 0.958 | 1.634 | 16.45   | 11.96 | 6  | 8    | 276  | 32.1  | 5.19 |
| Q6PDC0   | RUN domain-containing<br>protein 3B OS=Mus<br>musculus GN=Rundc3b<br>PE=2 SV=1 -                                                                              | 23.04 | 1 | 1  | 7  | 17   | 3.332 | 1.393 | 1.225 | 1.635 | 48.81   | 23.04 | 12 | 17   | 408  | 45.1  | 5.17 |
| P28665   | Murinoglobulin-1 OS=Mus<br>musculus GN=Mug1 PE=1<br>SV=3 - [MUG1_MOUSE]                                                                                       | 35.70 | 1 | 24 | 40 | 155  | 3.585 | 3.763 | 1.047 | 1.635 | 478.66  | 35.70 | 63 | 155  | 1476 | 165.2 | 6.42 |
| O88939-2 | Isoform 2 of Zinc finger<br>and BTB domain-<br>containing protein 7A<br>OS=Mus musculus<br>GN=Zbtb7a -<br>[ZBTB_MOUSE]                                        | 12.92 | 4 | 4  | 4  | 5    | 0.666 | 0.761 | 0.808 | 1.641 | 18.09   | 12.92 | 5  | 5    | 565  | 59.7  | 5.26 |
| Q61282   | Aggrecan core protein<br>OS=Mus musculus<br>GN=Acan PE=1 SV=2 -<br>[PGCA_MOUSE]                                                                               | 13.56 | 1 | 21 | 22 | 73   | 3.715 | 1.590 | 2.171 | 1.642 | 210.31  | 13.56 | 37 | 73   | 2132 | 221.8 | 4.30 |
| D3Z683   | Alpha-1,3-mannosyl-<br>glycoprotein 4-beta-N-<br>acetylglucosaminyltransfer<br>ase C (Fragment) OS=Mus<br>musculus GN=Mgat4c<br>PE=2 SV=1 -<br>[D3Z683_MOUSE] | 19.48 | 3 | 1  | 1  | 1    | 0.877 | 1.292 | 1.251 | 1.647 | 3.06    | 19.48 | 1  | 1    | 77   | 9.3   | 9.11 |
| Q8BLR5   | PH and SEC7 domain-<br>containing protein 4<br>OS=Mus musculus<br>GN=Psd4 PE=2 SV=1 -<br>[PSD4_MOUSE]                                                         | 4.88  | 1 | 2  | 3  | 17   | 0.712 | 6.919 | 1.615 | 1.648 | 30.42   | 4.88  | 4  | 17   | 1005 | 112.7 | 5.24 |
| Q8BGY7   | Protein FAM210A OS=Mus<br>musculus GN=Fam210a<br>PE=2 SV=1 -<br>[F210A_MOUSE]                                                                                 | 10.26 | 1 | 3  | 3  | 10   | 0.860 | 1.399 | 1.314 | 1.653 | 24.89   | 10.26 | 5  | 10   | 273  | 31.6  | 9.82 |
| Q91X91   | Nicotinate-nucleotide<br>pyrophosphorylase<br>[carboxylating] OS=Mus<br>musculus GN=Qprt PE=2<br>SV=1 - [NADC_MOUSE]                                          | 17.39 | 1 | 5  | 5  | 11   | 1.716 | 1.810 | 1.225 | 1.653 | 28.41   | 17.39 | 10 | 11   | 299  | 31.5  | 6.71 |
| Q99L04   | Dehydrogenase/reductase<br>SDR family member 1<br>OS=Mus musculus<br>GN=Dhrs1 PE=2 SV=1 -<br>[DHRS1_MOUSE]                                                    | 41.21 | 1 | 11 | 11 | 48   | 0.821 | 1.092 | 1.572 | 1.655 | 153.43  | 41.21 | 17 | 48   | 313  | 34.0  | 8.35 |
| Q3TVW5   | Trichoplein keratin filament<br>binding protein OS=Mus<br>musculus GN=Tchp PE=1<br>SV=2 - [TCHP_MOUSE]                                                        | 8.45  | 3 | 4  | 4  | 20   | 0.964 | 0.850 | 1.269 | 1.655 | 38.74   | 8.45  | 5  | 20   | 497  | 60.6  | 6.80 |
| D3YU05   | Glyceraldehyde-3-<br>phosphate dehydrogenase<br>OS=Mus musculus<br>GN=Gm6316 PE=3 SV=1 -<br>[D3YU05_MOUSE]                                                    | 44.25 | 1 | 1  | 17 | 1318 | 3.427 | 2.848 | 1.880 | 1.656 | 3801.54 | 44.25 | 34 | 1318 | 339  | 36.5  | 8.46 |
| Q8VD26-2 | Isoform 2 of<br>Transmembrane protein<br>143 OS=Mus musculus<br>GN=Tmem143                                                                                    | 8.61  | 4 | 3  | 3  | 11   | 0.526 | 1.177 | 1.496 | 1.658 | 31.04   | 8.61  | 6  | 11   | 453  | 51.0  | 9.14 |
| Q5UAK0-5 | Isoform 5 of Mesoderm<br>induction early response<br>protein 1 OS=Mus<br>musculus GN=Mier1 -<br>[MIER1_MOUSE]                                                 | 10.00 | 5 | 2  | 3  | 9    | 4.702 | 2.203 | 1.298 | 1.664 | 18.89   | 10.00 | 6  | 9    | 330  | 37.3  | 5.31 |
| P55088   | Aquaporin-4 OS=Mus<br>musculus GN=Aqp4 PE=2<br>SV=2 - [AQP4_MOUSE]                                                                                            | 30.96 | 3 | 7  | 7  | 26   | 1.051 | 1.049 | 1.301 | 1.666 | 86.88   | 30.96 | 11 | 26   | 323  | 34.4  | 7.42 |
| D3Z3B0   | Nicotinamide<br>mononucleotide<br>adenylyltransferase 3<br>OS=Mus musculus<br>GN=Ninat3 PE=2 SV=1 -<br>[NINAT3_MOUSE]                                         | 9.63  | 3 | 1  | 1  | 2    | 1.343 | 2.625 | 2.363 | 1.668 | 6.64    | 9.63  | 2  | 2    | 135  | 14.9  | 7.44 |
| Q8R1S0   | Ubiquinone biosynthesis<br>monooxygenase COQ6<br>OS=Mus musculus<br>GN=Cqo6 PE=2 SV=3 -<br>[COQ6_MOUSE]                                                       | 14.29 | 4 | 7  | 7  | 19   | 1.045 | 1.647 | 1.332 | 1.669 | 56.26   | 14.29 | 11 | 19   | 476  | 51.4  | 7.17 |



|          |                                                                                                              |       |   |    |    |     |       |       |       |       |         |       |     |     |      |       |       |
|----------|--------------------------------------------------------------------------------------------------------------|-------|---|----|----|-----|-------|-------|-------|-------|---------|-------|-----|-----|------|-------|-------|
| Q8BHB9   | Chloride intracellular channel protein 6 OS=Mus musculus GN=Clic6 PE=2 SV=1 - [CLIC6_MOUSE]                  | 17.62 | 3 | 8  | 8  | 13  | 1.632 | 2.393 | 1.006 | 1.670 | 28.94   | 17.62 | 12  | 13  | 596  | 62.8  | 4.32  |
| Q9CR27   | WASH complex subunit CCDC53 OS=Mus musculus GN=Ccdc53 PE=2 SV=1 -                                            | 23.71 | 2 | 3  | 3  | 12  | 3.257 | 1.689 | 1.177 | 1.670 | 28.45   | 23.71 | 6   | 12  | 194  | 21.1  | 4.46  |
| Q61818-2 | Isoform 2 of Retinoic acid-induced protein 1 OS=Mus musculus GN=Ret1 - [RAI1_MOUSE]                          | 5.43  | 2 | 6  | 6  | 12  | 0.831 | 0.899 | 1.505 | 1.673 | 28.96   | 5.43  | 7   | 12  | 1840 | 196.0 | 8.87  |
| Q8K370   | Acyl-CoA dehydrogenase family member 10 OS=Mus musculus GN=Acad10 PE=2 SV=1 - [ACD10_MOUSE]                  | 10.57 | 3 | 2  | 9  | 17  | 1.995 | 1.318 | 0.815 | 1.675 | 57.23   | 10.57 | 13  | 17  | 1069 | 118.9 | 8.24  |
| Q8C0P5   | Coronin-2A OS=Mus musculus GN=Coro2a PE=2 SV=1 - [COR2A_MOUSE]                                               | 20.80 | 2 | 11 | 13 | 39  | 0.870 | 0.927 | 1.321 | 1.675 | 99.20   | 20.80 | 20  | 39  | 524  | 59.5  | 7.71  |
| Q7TT41   | DBH-like monooxygenase protein 2 OS=Mus musculus GN=Moxd2 PE=2 SV=1 -                                        | 4.68  | 1 | 1  | 1  | 5   | 0.719 | 0.363 | 1.531 | 1.676 | 0.00    | 4.68  | 1   | 5   | 619  | 69.4  | 4.92  |
| Q62421   | Endophilin-A3 OS=Mus musculus GN=Sh3gl3 PE=2 SV=1 - [SH3G3_MOUSE]                                            | 61.38 | 4 | 1  | 20 | 75  | 0.853 | 2.923 | 2.126 | 1.682 | 252.62  | 61.38 | 34  | 75  | 347  | 38.9  | 5.12  |
| Q6URW6   | Myosin-14 OS=Mus musculus GN=Myl14 PE=1 SV=1 - [MYH14_MOUSE]                                                 | 37.95 | 7 | 2  | 72 | 242 | 1.001 | 0.705 | 1.290 | 1.683 | 695.15  | 37.95 | 126 | 242 | 2000 | 228.4 | 5.55  |
| J3KMP5   | Uncharacterized protein OS=Mus musculus GN=Gm21897 PE=4 SV=1 - [J3KMP5_MOUSE]                                | 6.00  | 6 | 2  | 3  | 3   | 1.389 | 1.090 | 1.268 | 1.690 | 7.66    | 6.00  | 3   | 3   | 500  | 58.1  | 9.94  |
| Q9QYG0   | Protein NDRG2 OS=Mus musculus GN=Ndr2 PE=1 SV=1 - [NDRG2_MOUSE]                                              | 69.00 | 1 | 1  | 17 | 292 | 0.196 | 0.518 | 0.970 | 1.690 | 865.35  | 69.00 | 31  | 292 | 371  | 40.8  | 5.40  |
| O35488   | Very long-chain acyl-CoA synthetase OS=Mus musculus GN=Slc27a2 PE=1 SV=2 - [S27A2_MOUSE]                     | 14.03 | 2 | 9  | 9  | 17  | 0.823 | 0.659 | 0.956 | 1.690 | 38.06   | 14.03 | 13  | 17  | 620  | 70.4  | 8.90  |
| J3QQ44   | Endophilin-A3 OS=Mus musculus GN=Sh3gl3 PE=4 SV=1 - [J3QQ44_MOUSE]                                           | 64.42 | 3 | 1  | 17 | 62  | 0.930 | 1.878 | 1.700 | 1.692 | 206.85  | 64.42 | 29  | 62  | 312  | 35.1  | 5.03  |
| Q9CQ56   | Vesicle transport protein USE1 OS=Mus musculus GN=Use1 PE=2 SV=1 - [USE1_MOUSE]                              | 23.70 | 4 | 6  | 6  | 17  | 0.796 | 1.173 | 1.089 | 1.694 | 47.37   | 23.70 | 11  | 17  | 270  | 30.6  | 9.11  |
| P56501   | Mitochondrial uncoupling protein 3 OS=Mus musculus GN=Ucp3 PE=2 SV=1 - [UCP3_MOUSE]                          | 5.19  | 1 | 1  | 1  | 2   | 1.047 | 1.359 | 1.228 | 1.698 | 8.63    | 5.19  | 2   | 2   | 308  | 33.9  | 9.55  |
| G3UYF8   | Homeobox protein unc-4 homolog OS=Mus musculus GN=Unx PE=2 SV=1 - [G3UYF8_MOUSE]                             | 11.56 | 1 | 1  | 1  | 1   | 0.443 | 0.704 | 0.892 | 1.700 | 2.13    | 11.56 | 1   | 1   | 294  | 32.7  | 12.19 |
| F6VJ09   | Breast carcinoma-amplified sequence 3 homolog (Fragment) OS=Mus musculus GN=Bcas3 PE=4 SV=1 - [F6VJ09_MOUSE] | 32.56 | 1 | 2  | 3  | 16  | 0.860 | 0.560 | 1.273 | 1.700 | 41.93   | 32.56 | 6   | 16  | 86   | 9.4   | 9.57  |
| Q3V0K9   | Plastin-1 OS=Mus musculus GN=Pls1 PE=2 SV=1 - [PLS1_MOUSE]                                                   | 34.13 | 2 | 14 | 17 | 53  | 1.384 | 0.545 | 1.543 | 1.704 | 153.43  | 34.13 | 30  | 53  | 630  | 70.4  | 5.38  |
| Q9JM62-2 | Isoform 2 of Receptor expression-enhancing protein 6 OS=Mus musculus GN=Reep6 - [REEP6_MOUSE]                | 5.75  | 2 | 1  | 1  | 2   | 0.789 | 1.040 | 1.402 | 1.707 | 4.73    | 5.75  | 2   | 2   | 174  | 19.4  | 7.87  |
| Q91253   | Glyoxylate reductase/hydroxypyruvate reductase OS=Mus musculus GN=Grhpr PE=1 SV=1 - [GRHPR_MOUSE]            | 64.02 | 3 | 17 | 17 | 69  | 0.741 | 0.873 | 1.196 | 1.710 | 210.49  | 64.02 | 28  | 69  | 328  | 35.3  | 7.65  |
| Q9QUG2-2 | Isoform 2 of DNA polymerase kappa OS=Mus musculus GN=Polk - [POLK_MOUSE]                                     | 3.92  | 3 | 2  | 2  | 3   | 1.422 | 1.068 | 0.910 | 1.710 | 5.91    | 3.92  | 2   | 3   | 739  | 82.6  | 5.49  |
| Q60773   | Cyclin-dependent kinase 4 inhibitor D OS=Mus musculus GN=Cdkn2d PE=1 SV=2 -                                  | 18.67 | 1 | 2  | 2  | 3   | 2.089 | 1.086 | 2.173 | 1.712 | 12.38   | 18.67 | 3   | 3   | 166  | 17.8  | 6.25  |
| G3UZ26   | Serine hydroxymethyltransferase (Fragment) OS=Mus musculus GN=Shmt1 PE=3 SV=1 -                              | 15.49 | 4 | 6  | 7  | 12  | 1.252 | 0.995 | 1.448 | 1.712 | 30.60   | 15.49 | 11  | 12  | 439  | 48.4  | 7.01  |
| P10649   | Glutathione S-transferase Mu 1 OS=Mus musculus GN=Gstm1 PE=1 SV=2 - [GSTM1_MOUSE]                            | 75.23 | 4 | 11 | 20 | 477 | 0.901 | 2.359 | 1.398 | 1.715 | 1568.50 | 75.23 | 38  | 477 | 218  | 26.0  | 7.94  |
| P52760   | Ribonuclease UK114 OS=Mus musculus GN=Hrsp12 PE=1 SV=3 - [UK114_MOUSE]                                       | 92.59 | 1 | 9  | 11 | 87  | 2.287 | 1.622 | 2.138 | 1.715 | 237.64  | 92.59 | 21  | 87  | 135  | 14.2  | 8.68  |
| P16460   | Argininosuccinate synthase OS=Mus musculus GN=Ass1 PE=1 SV=1 - [ASSY_MOUSE]                                  | 47.33 | 3 | 21 | 21 | 99  | 0.899 | 1.263 | 1.141 | 1.716 | 262.00  | 47.33 | 37  | 99  | 412  | 46.6  | 8.22  |

|           |                                                                                                          |       |    |    |    |      |       |        |       |       |         |       |    |      |      |       |      |
|-----------|----------------------------------------------------------------------------------------------------------|-------|----|----|----|------|-------|--------|-------|-------|---------|-------|----|------|------|-------|------|
| Q3UZP4    | Small VCP/p97-interacting protein OS=Mus musculus GN=Swip PE=2 SV=1 - [SVIP_MOUSE]                       | 32.47 | 1  | 2  | 2  | 27   | 1.591 | 0.952  | 1.729 | 1.717 | 73.92   | 32.47 | 4  | 27   | 77   | 8.4   | 8.91 |
| Q9JHH6    | Carboxypeptidase B2 OS=Mus musculus GN=Cpb2 PE=1 SV=1 - [CBPB2_MOUSE]                                    | 5.45  | 1  | 2  | 2  | 2    | 1.699 | 1.169  | 0.936 | 1.719 | 4.47    | 5.45  | 2  | 2    | 422  | 48.8  | 7.97 |
| D3YZR0    | Protein Gm15737 OS=Mus musculus GN=Gm15737 PE=4 SV=1 - [D3YZR0_MOUSE]                                    | 16.04 | 1  | 1  | 1  | 2    | 1.501 | 1.251  | 1.438 | 1.724 | 6.60    | 16.04 | 1  | 2    | 106  | 11.8  | 9.72 |
| P01868    | Ig gamma-1 chain C region secreted form OS=Mus musculus GN=Ighg1 PE=1 SV=1 - [IGHG1_MOUSE]               | 22.53 | 2  | 5  | 5  | 22   | 2.697 | 5.125  | 0.897 | 1.726 | 51.88   | 22.53 | 10 | 22   | 324  | 35.7  | 7.40 |
| Q9JL80    | MAGUK p55 subfamily member 6 OS=Mus musculus GN=Mpp6 PE=1 SV=1 - [MPP6_MOUSE]                            | 55.15 | 3  | 1  | 30 | 142  | 0.679 | 0.670  | 0.992 | 1.728 | 407.23  | 55.15 | 56 | 142  | 553  | 62.6  | 6.40 |
| P50608    | Fibromodulin OS=Mus musculus GN=Fmod PE=2 SV=1 - [FMOD_MOUSE]                                            | 16.22 | 1  | 5  | 5  | 18   | 0.526 | 10.188 | 1.173 | 1.729 | 45.91   | 16.22 | 10 | 18   | 376  | 43.0  | 6.04 |
| F7D143    | Uncharacterized protein KIAA0232 (Fragment) OS=Mus musculus GN=DSErttd579e PE=2 SV=1 - [F7D143_MOUSE]    | 4.00  | 3  | 3  | 3  | 3    | 1.179 | 1.341  | 2.070 | 1.729 | 4.40    | 4.00  | 3  | 3    | 1274 | 141.0 | 4.89 |
| Q9CQ71    | Replication protein A 14 kDa subunit OS=Mus musculus GN=Rpa3 PE=2 SV=1 - [RFA3_MOUSE]                    | 38.84 | 1  | 3  | 3  | 7    | 2.347 | 1.107  | 1.154 | 1.730 | 21.59   | 38.84 | 5  | 7    | 121  | 13.6  | 4.84 |
| Q921C1    | Gap junction gamma-3 protein OS=Mus musculus GN=Gjc3 PE=2 SV=2 - [CXG3_MOUSE]                            | 8.92  | 1  | 2  | 2  | 4    | 0.820 | 0.290  | 1.478 | 1.733 | 11.84   | 8.92  | 3  | 4    | 269  | 30.3  | 8.37 |
| P13597-2  | Isoform 2 of Intercellular adhesion molecule 1 OS=Mus musculus GN=Icam1 -                                | 7.53  | 2  | 4  | 4  | 8    | 1.524 | 2.365  | 1.691 | 1.734 | 20.43   | 7.53  | 6  | 8    | 531  | 58.7  | 6.21 |
| Q9WVL0    | Maleylacetacetate isomerase OS=Mus musculus GN=Gatz1 PE=1 SV=1 - [MAAI_MOUSE]                            | 73.15 | 1  | 13 | 13 | 67   | 0.593 | 1.207  | 1.008 | 1.737 | 206.90  | 73.15 | 24 | 67   | 216  | 24.3  | 7.85 |
| Q80TE0-2  | Isoform 2 of RNA polymerase II-associated protein 1 OS=Mus musculus GN=Rpap1 - [RPAP1_MOUSE]             | 5.19  | 1  | 1  | 5  | 6    | 0.640 | 2.851  | 2.060 | 1.737 | 15.90   | 5.19  | 6  | 6    | 1290 | 141.5 | 6.60 |
| J3QNRS    | Uncharacterized protein OS=Mus musculus GN=Tubb4b-ps1 PE=3 SV=1 - [J3QNRS_MOUSE]                         | 70.72 | 2  | 5  | 28 | 3377 | 0.923 | 1.419  | 1.568 | 1.737 | 8456.17 | 70.72 | 51 | 3377 | 444  | 49.8  | 4.83 |
| Q8K406    | Leucine-rich repeat LGI family member 3 OS=Mus musculus GN=Lgi3 PE=1 SV=1 - [LGI3_MOUSE]                 | 32.85 | 1  | 16 | 16 | 58   | 1.041 | 0.399  | 1.207 | 1.738 | 138.51  | 32.85 | 28 | 58   | 548  | 61.8  | 8.16 |
| AZARX0    | Protein Gm14443 OS=Mus musculus GN=Gm14443 PE=4 SV=1 - [AZARX0_MOUSE]                                    | 11.48 | 2  | 1  | 2  | 2    | 1.600 | 1.140  | 1.887 | 1.741 | 2.93    | 11.48 | 2  | 2    | 610  | 70.5  | 9.06 |
| Q8CDK8    | Prominin-1 OS=Mus musculus GN=Prom1 PE=2 SV=1 - [Q8CDK8_MOUSE]                                           | 23.58 | 4  | 1  | 14 | 39   | 0.977 | 0.529  | 0.944 | 1.743 | 93.39   | 23.58 | 23 | 39   | 827  | 92.7  | 6.55 |
| D3Z2N8    | Coiled-coil domain-containing protein 67 (Fragment) OS=Mus musculus GN=Ccdc67 PE=2 SV=1 - [D3Z2N8_MOUSE] | 6.05  | 3  | 2  | 4  | 11   | 1.772 | 1.063  | 1.500 | 1.745 | 16.25   | 6.05  | 5  | 11   | 397  | 46.3  | 6.25 |
| P84096    | Rho-related GTP-binding protein RhoG OS=Mus musculus GN=Rhog PE=2 SV=1 - [RHOG_MOUSE]                    | 54.45 | 7  | 10 | 11 | 92   | 0.936 | 0.369  | 1.453 | 1.747 | 273.37  | 54.45 | 20 | 92   | 191  | 21.3  | 8.12 |
| Q6ZWR6-5  | Isoform 5 of Nesprin-1 OS=Mus musculus GN=Syne1 - [SYNE1_MOUSE]                                          | 26.42 | 1  | 1  | 30 | 66   | 0.723 | 0.982  | 2.704 | 1.749 | 200.44  | 26.42 | 47 | 66   | 1431 | 165.1 | 6.42 |
| Q8K1S1    | Leucine-rich repeat LGI family member 4 OS=Mus musculus GN=Lgi4 PE=1 SV=1 - [LGI4_MOUSE]                 | 6.70  | 1  | 4  | 4  | 9    | 0.969 | 1.439  | 1.356 | 1.749 | 21.17   | 6.70  | 7  | 9    | 537  | 59.3  | 7.78 |
| P07759    | Serine protease inhibitor A3K OS=Mus musculus GN=Serpina3k PE=1 SV=2 - [SPA3K_MOUSE]                     | 46.89 | 1  | 11 | 16 | 126  | 3.569 | 2.223  | 0.810 | 1.752 | 395.72  | 46.89 | 28 | 126  | 418  | 46.8  | 5.16 |
| D6R142    | Protein Zc3h7a OS=Mus musculus GN=Zc3h7a PE=2 SV=1 - [D6R142_MOUSE]                                      | 6.67  | 7  | 2  | 2  | 4    | 1.826 | 1.143  | 1.219 | 1.754 | 6.67    | 6.67  | 2  | 4    | 390  | 43.1  | 4.87 |
| Q810U3    | Neurofascin OS=Mus musculus GN=Nfasc PE=1 SV=1 - [NFASC_MOUSE]                                           | 41.69 | 1  | 5  | 47 | 346  | 0.864 | 1.778  | 1.862 | 1.761 | 1044.89 | 41.69 | 80 | 346  | 1240 | 137.9 | 6.19 |
| P19157    | Glutathione S-transferase P 1 OS=Mus musculus GN=Gstp1 PE=1 SV=2 - [GSTP1_MOUSE]                         | 59.05 | 3  | 11 | 11 | 197  | 0.802 | 1.469  | 1.305 | 1.764 | 587.08  | 59.05 | 18 | 197  | 210  | 23.6  | 7.87 |
| Q99P11-24 | Isoform 24 of Protocadherin-15 OS=Mus musculus GN=Pcdh15 - [PCD15_MOUSE]                                 | 3.45  | 21 | 4  | 4  | 7    | 0.359 | 0.745  | 1.328 | 1.767 | 9.77    | 3.45  | 4  | 7    | 1363 | 149.8 | 5.71 |
| Q91XA9    | Acidic mammalian chitinase OS=Mus musculus GN=Chia PE=1 SV=2 - [CHIA_MOUSE]                              | 4.23  | 2  | 1  | 2  | 3    | 1.092 | 1.112  | 0.880 | 1.767 | 2.08    | 4.23  | 2  | 3    | 473  | 52.0  | 5.06 |

|          |                                                                                                                      |       |   |    |    |     |       |       |       |       |         |       |     |     |      |       |      |
|----------|----------------------------------------------------------------------------------------------------------------------|-------|---|----|----|-----|-------|-------|-------|-------|---------|-------|-----|-----|------|-------|------|
| P24549   | Retinal dehydrogenase 1<br>OS=Mus musculus<br>GN=Aldh1a1 PE=1 SV=5 -<br>[AL1A1_MOUSE]                                | 42.71 | 2 | 17 | 18 | 91  | 0.891 | 0.689 | 1.078 | 1.769 | 284.86  | 42.71 | 33  | 91  | 501  | 54.4  | 7.80 |
| Q6A044-2 | Isoform 2 of Protein<br>FAM189A1 OS=Mus<br>musculus GN=Fam189a1 -<br>[F1891_MOUSE]                                   | 20.86 | 2 | 2  | 2  | 3   | 2.274 | 2.044 | 2.971 | 1.776 | 10.31   | 20.86 | 3   | 3   | 139  | 14.7  | 6.25 |
| Q148P6-2 | Isoform 2 of Leucine-rich<br>repeat-containing protein<br>LOC400891 homolog<br>OS=Mus musculus -<br>[YV012_MOUSE]    | 2.51  | 1 | 1  | 1  | 1   | 0.900 | 0.981 | 1.474 | 1.778 | 0.00    | 2.51  | 1   | 1   | 359  | 38.3  | 5.68 |
| Q65CL1   | Catenin alpha-3 OS=Mus<br>musculus GN=Ctnna3<br>PE=1 SV=2 -<br>[CTNA3_MOUSE]                                         | 8.27  | 1 | 5  | 6  | 12  | 0.912 | 0.455 | 1.209 | 1.778 | 35.43   | 8.27  | 10  | 12  | 895  | 99.7  | 6.52 |
| Q8VIMS   | Myocardin OS=Mus<br>musculus GN=Myocd<br>PE=1 SV=2 -<br>[MYCD_MOUSE]                                                 | 2.78  | 2 | 1  | 2  | 2   | 3.799 | 2.731 | 2.922 | 1.784 | 4.87    | 2.78  | 2   | 2   | 935  | 101.3 | 6.29 |
| P97760   | DNA-directed RNA<br>polymerase II subunit<br>RPB3 OS=Mus musculus<br>GN=Polr2c PE=2 SV=1 -<br>[RPB3_MOUSE]           | 17.09 | 2 | 4  | 4  | 9   | 1.313 | 0.667 | 1.761 | 1.791 | 30.08   | 17.09 | 6   | 9   | 275  | 31.3  | 4.97 |
| Q8C5D8-3 | Isoform 3 of E3 SUMO-<br>protein ligase PIAS2<br>OS=Mus musculus<br>GN=Piase2 -                                      | 3.73  | 9 | 1  | 2  | 2   | 1.056 | 0.971 | 0.854 | 1.791 | 5.46    | 3.73  | 2   | 2   | 563  | 62.3  | 8.22 |
| AZADE6   | Filamin-binding LIM<br>protein 1 (Fragment)<br>OS=Mus musculus<br>GN=Fblim1 PE=4 SV=1 -<br>[AZADE6_MOUSE]            | 39.43 | 9 | 3  | 3  | 6   | 1.690 | 3.821 | 1.356 | 1.792 | 12.65   | 39.43 | 5   | 6   | 175  | 18.3  | 5.14 |
| O88700   | Bloom syndrome protein<br>homolog OS=Mus<br>musculus GN=Blm PE=1<br>SV=1 - [BLM_MOUSE]                               | 3.25  | 2 | 3  | 4  | 4   | 1.471 | 1.221 | 1.428 | 1.793 | 10.55   | 3.25  | 4   | 4   | 1416 | 158.3 | 7.27 |
| Q80U19   | Disheveled-associated<br>activator of<br>morphogenesis 2 OS=Mus<br>musculus GN=Daam2<br>PE=2 SV=4 -<br>[DAAM2_MOUSE] | 24.48 | 4 | 22 | 26 | 69  | 0.991 | 0.737 | 1.873 | 1.801 | 187.69  | 24.48 | 43  | 69  | 1115 | 128.3 | 6.92 |
| P01872   | Ig mu chain C region<br>secreted form OS=Mus<br>musculus GN=Igh-6 PE=1<br>SV=2 - [IGHM_MOUSE]                        | 32.38 | 2 | 11 | 12 | 35  | 2.533 | 3.177 | 1.278 | 1.801 | 110.10  | 32.38 | 20  | 35  | 454  | 49.9  | 7.01 |
| E9Q5M6   | Protein Wdr52 OS=Mus<br>musculus GN=Wdr52<br>PE=4 SV=1 -<br>[E9Q5M6_MOUSE]                                           | 2.22  | 2 | 4  | 4  | 5   | 0.675 | 0.938 | 1.048 | 1.803 | 7.25    | 2.22  | 4   | 5   | 1843 | 211.4 | 5.53 |
| Q91XG9   | Nitric oxide-associated<br>protein 1 OS=Mus<br>musculus GN=Noa1 PE=1<br>SV=1 - [NOA1_MOUSE]                          | 7.07  | 1 | 3  | 3  | 6   | 0.499 | 0.552 | 0.944 | 1.807 | 16.43   | 7.07  | 4   | 6   | 693  | 77.3  | 8.12 |
| P70665-3 | Isoform 3 of Sialate O-<br>acetyltransferase OS=Mus<br>musculus GN=Siae -<br>[SIAE_MOUSE]                            | 13.59 | 3 | 4  | 4  | 7   | 3.045 | 0.834 | 0.957 | 1.809 | 18.48   | 13.59 | 7   | 7   | 390  | 43.9  | 5.86 |
| O35231   | Kinesin-like protein KIFC3<br>OS=Mus musculus<br>GN=Kifc3 PE=1 SV=4 -<br>[KIFC3_MOUSE]                               | 9.34  | 4 | 6  | 7  | 10  | 2.135 | 1.607 | 1.201 | 1.816 | 21.70   | 9.34  | 8   | 10  | 824  | 92.5  | 7.71 |
| Q9DCE9   | Protein Iqtp OS=Mus<br>musculus GN=Iqtp PE=2<br>SV=1 - [Q9DCE9_MOUSE]                                                | 5.44  | 1 | 2  | 2  | 4   | 1.371 | 1.442 | 1.172 | 1.818 | 13.66   | 5.44  | 4   | 4   | 423  | 48.5  | 7.77 |
| Q9WVFB   | Tumor suppressor<br>candidate 2 OS=Mus<br>musculus GN=Tusc2 PE=1<br>SV=3 - [TUSC2_MOUSE]                             | 41.82 | 1 | 3  | 3  | 8   | 1.211 | 0.827 | 1.925 | 1.820 | 26.55   | 41.82 | 6   | 8   | 110  | 12.1  | 9.69 |
| E9Q1Q9   | Ketohexokinase OS=Mus<br>musculus GN=Kk PE=2<br>SV=1 - [E9Q1Q9_MOUSE]                                                | 8.45  | 2 | 2  | 3  | 6   | 0.866 | 0.900 | 1.247 | 1.844 | 17.78   | 8.45  | 6   | 6   | 343  | 37.7  | 6.06 |
| P51910   | Apolipoprotein D OS=Mus<br>musculus GN=ApoD PE=2<br>SV=1 - [APOD_MOUSE]                                              | 34.92 | 1 | 6  | 6  | 34  | 1.819 | 0.624 | 1.477 | 1.851 | 89.85   | 34.92 | 9   | 34  | 189  | 21.5  | 4.91 |
| Q55YD0   | Unconventional myosin-Id<br>OS=Mus musculus<br>GN=Myo1d PE=1 SV=1 -<br>[MYO1D_MOUSE]                                 | 41.35 | 2 | 36 | 39 | 117 | 0.896 | 0.424 | 1.531 | 1.851 | 347.91  | 41.35 | 63  | 117 | 1006 | 116.0 | 9.41 |
| P24529   | Tyrosine 3-<br>monooxygenase OS=Mus<br>musculus GN=Th PE=1<br>SV=3 - [TY3H_MOUSE]                                    | 39.96 | 5 | 15 | 15 | 55  | 0.479 | 0.385 | 2.388 | 1.855 | 150.03  | 39.96 | 28  | 55  | 498  | 56.0  | 6.15 |
| E9Q672   | B-cell lymphoma/leukemia<br>11B OS=Mus musculus<br>GN=Rtl1 PE=2 SV=1 -<br>[E9Q672_MOUSE]                             | 6.56  | 2 | 1  | 1  | 1   | 1.057 | 0.917 | 1.497 | 1.855 | 0.00    | 6.56  | 1   | 1   | 183  | 21.6  | 9.09 |
| E9QPE7   | Myosin-11 OS=Mus<br>musculus GN=Myh11<br>PE=4 SV=1 -<br>[E9QPE7_MOUSE]                                               | 46.49 | 3 | 3  | 95 | 480 | 0.229 | 3.992 | 0.696 | 1.861 | 1356.36 | 46.49 | 164 | 480 | 1938 | 223.2 | 5.50 |
| Q61704   | Inter-alpha-trypsin<br>inhibitor heavy chain H3<br>OS=Mus musculus<br>GN=Itih3 PE=1 SV=3 -<br>[ITIH3_MOUSE]          | 31.50 | 2 | 19 | 19 | 107 | 1.413 | 1.058 | 0.968 | 1.864 | 292.48  | 31.50 | 33  | 107 | 889  | 99.3  | 6.05 |
| Q640L5   | Coiled-coil domain-<br>containing protein 18<br>OS=Mus musculus<br>GN=Ccdc18 PE=2 SV=1 -<br>[CCD18_MOUSE]            | 1.10  | 4 | 1  | 2  | 2   | 1.609 | 0.408 | 1.738 | 1.865 | 4.18    | 1.10  | 2   | 2   | 1455 | 169.6 | 5.49 |
| Q8BW75   | Amine oxidase (flavin-<br>containing) B OS=Mus<br>musculus GN=Maob PE=1<br>SV=4 - [AOFB_MOUSE]                       | 56.73 | 3 | 21 | 25 | 132 | 0.773 | 1.397 | 1.417 | 1.865 | 343.15  | 56.73 | 45  | 132 | 520  | 58.5  | 8.29 |

|          |                                                                                                            |       |    |    |    |     |        |       |       |       |        |       |    |     |      |       |      |
|----------|------------------------------------------------------------------------------------------------------------|-------|----|----|----|-----|--------|-------|-------|-------|--------|-------|----|-----|------|-------|------|
| E9PZQ0   | Ryanodine receptor 1<br>OS=Mus musculus<br>GN=Ryr1 PE=1 SV=1 -<br>[RYR1_MOUSE]                             | 1.37  | 2  | 4  | 8  | 11  | 2.178  | 1.914 | 1.979 | 1.868 | 24.43  | 1.37  | 9  | 11  | 5035 | 564.7 | 5.27 |
| P29788   | Vitronectin OS=Mus musculus<br>GN=Vtn PE=1 SV=2 - [VTNC_MOUSE]                                             | 11.09 | 1  | 4  | 5  | 13  | 2.326  | 1.809 | 1.437 | 1.874 | 46.00  | 11.09 | 7  | 13  | 478  | 54.8  | 5.88 |
| P01878   | Ig alpha chain C region<br>OS=Mus musculus PE=1 SV=1 - [IGHA_MOUSE]                                        | 9.01  | 1  | 2  | 2  | 3   | 1.600  | 2.605 | 0.819 | 1.874 | 9.13   | 9.01  | 3  | 3   | 344  | 36.9  | 5.06 |
| P58660   | Caspase recruitment domain-containing protein 10<br>OS=Mus musculus<br>GN=Card10 PE=2 SV=1 - [CAR10_MOUSE] | 4.31  | 2  | 2  | 4  | 6   | 26.984 | 1.766 | 1.988 | 1.875 | 12.13  | 4.31  | 4  | 6   | 1021 | 114.3 | 6.14 |
| Q8QZR5   | Alanine aminotransferase 1<br>OS=Mus musculus<br>GN=Gpt PE=2 SV=3 - [ALAT1_MOUSE]                          | 24.19 | 1  | 9  | 10 | 23  | 2.414  | 1.133 | 1.604 | 1.878 | 61.58  | 24.19 | 16 | 23  | 496  | 55.1  | 6.64 |
| E9PX64   | Kinesin-like protein KIF26B<br>OS=Mus musculus<br>GN=Kif26b PE=2 SV=1 - [E9PX64_MOUSE]                     | 1.26  | 2  | 1  | 2  | 2   | 1.062  | 0.154 | 3.845 | 1.884 | 4.67   | 1.26  | 2  | 2   | 1665 | 179.1 | 8.15 |
| P97496-2 | Isoform 2 of SWI/SNF complex subunit SMARCC1<br>OS=Mus musculus<br>GN=Smarcc1 - [SMRC1_MOUSE]              | 9.58  | 5  | 3  | 10 | 30  | 2.648  | 1.458 | 1.156 | 1.889 | 81.33  | 9.58  | 17 | 30  | 1075 | 120.0 | 5.81 |
| Q9QY42   | Probable G-protein coupled receptor 37<br>OS=Mus musculus<br>GN=Gpr37 PE=2 SV=1 - [GPR37_MOUSE]            | 13.00 | 3  | 4  | 5  | 13  | 1.436  | 1.121 | 1.822 | 1.896 | 43.88  | 13.00 | 7  | 13  | 600  | 66.7  | 8.12 |
| Q63886   | UDP-glucuronosyltransferase 1-1<br>OS=Mus musculus<br>GN=Ugt1a1 PE=2 SV=2 - [UGT1A1_MOUSE]                 | 5.05  | 12 | 1  | 2  | 3   | 3.004  | 0.347 | 1.320 | 1.897 | 11.53  | 5.05  | 2  | 3   | 535  | 60.0  | 8.62 |
| F6ZAW1   | Protein Cald1 (Fragment)<br>OS=Mus musculus<br>GN=Cald1 PE=4 SV=1 - [F6ZAW1_MOUSE]                         | 35.07 | 2  | 2  | 9  | 36  | 0.457  | 2.730 | 1.797 | 1.904 | 83.00  | 35.07 | 12 | 36  | 211  | 24.7  | 5.52 |
| Q9ER97   | Neuroglobin OS=Mus musculus<br>GN=Ngb PE=1 SV=1 - [NGB_MOUSE]                                              | 42.38 | 3  | 4  | 4  | 19  | 1.287  | 2.110 | 0.787 | 1.908 | 43.25  | 42.38 | 8  | 19  | 151  | 17.0  | 5.88 |
| Q6PG88   | Probable global transcription activator SNF2L1<br>OS=Mus musculus<br>GN=Smarca1 PE=1 SV=1 - [SMCA1_MOUSE]  | 8.03  | 4  | 3  | 10 | 18  | 0.814  | 0.821 | 3.332 | 1.908 | 47.02  | 8.03  | 14 | 18  | 1046 | 121.6 | 8.27 |
| Q9QWV4   | Myeloid leukemia factor 1<br>OS=Mus musculus<br>GN=Mlf1 PE=1 SV=1 - [MLF1_MOUSE]                           | 3.37  | 2  | 1  | 1  | 3   | 1.440  | 0.870 | 0.789 | 1.908 | 7.27   | 3.37  | 2  | 3   | 267  | 30.4  | 9.32 |
| P10810   | Monocyte differentiation antigen CD14<br>OS=Mus musculus<br>GN=Cd14 PE=1 SV=1 - [CD14_MOUSE]               | 4.37  | 1  | 1  | 1  | 2   | 0.792  | 1.213 | 1.325 | 1.911 | 7.43   | 4.37  | 2  | 2   | 366  | 39.2  | 5.21 |
| Q00896   | Alpha-1-antitrypsin 1-3<br>OS=Mus musculus<br>GN=Serpina1c PE=1 SV=2 - [A1AT_MOUSE]                        | 52.91 | 2  | 4  | 17 | 175 | 3.895  | 4.353 | 0.707 | 1.913 | 503.99 | 52.91 | 31 | 175 | 412  | 45.8  | 5.44 |
| P47212   | Galanin peptides OS=Mus musculus<br>GN=Gal PE=2 SV=1 - [GALA_MOUSE]                                        | 40.32 | 1  | 3  | 3  | 14  | 1.328  | 1.148 | 0.970 | 1.913 | 47.42  | 40.32 | 5  | 14  | 124  | 13.5  | 6.54 |
| P43136   | Nuclear receptor subfamily 2 group F member 6<br>OS=Mus musculus<br>GN=Nr2f6 PE=1 SV=2 - [NR2F6_MOUSE]     | 11.03 | 3  | 2  | 2  | 6   | 0.703  | 0.523 | 2.328 | 1.919 | 5.71   | 11.03 | 3  | 6   | 390  | 41.9  | 7.56 |
| O88492   | Perilipin-4 OS=Mus musculus<br>GN=Plin4 PE=1 SV=2 - [PLIN4_MOUSE]                                          | 32.15 | 2  | 15 | 15 | 36  | 1.102  | 1.529 | 2.327 | 1.924 | 85.91  | 32.15 | 21 | 36  | 1403 | 139.3 | 8.59 |
| Q99093   | Interferon-induced transmembrane protein 2<br>OS=Mus musculus<br>GN=Ifitm2 PE=1 SV=1 - [IFITM2_MOUSE]      | 18.06 | 3  | 2  | 2  | 5   | 0.826  | 2.222 | 1.139 | 1.925 | 12.26  | 18.06 | 3  | 5   | 144  | 15.7  | 7.30 |
| Q9WV76   | Carbonic anhydrase 14<br>OS=Mus musculus<br>GN=Ca14 PE=1 SV=1 - [CAH14_MOUSE]                              | 20.18 | 1  | 6  | 6  | 37  | 1.442  | 0.449 | 1.736 | 1.933 | 105.38 | 20.18 | 10 | 37  | 337  | 37.5  | 6.35 |
| Q8CEE6   | PAS domain-containing serine/threonine-protein kinase OS=Mus musculus<br>GN=Pask PE=2 SV=3 - [PASK_MOUSE]  | 4.48  | 1  | 3  | 3  | 4   | 2.654  | 1.506 | 1.140 | 1.934 | 8.63   | 4.48  | 3  | 4   | 1383 | 151.2 | 5.07 |
| Q8BGQ4-2 | Isoform 2 of Protein O-mannosyl-transferase 2<br>OS=Mus musculus<br>GN=Pomt2 - [POMT2_MOUSE]               | 4.48  | 3  | 2  | 2  | 2   | 1.334  | 1.322 | 1.325 | 1.936 | 6.39   | 4.48  | 2  | 2   | 603  | 67.8  | 9.47 |
| P17563   | Selenium-binding protein 1<br>OS=Mus musculus<br>GN=Selenbp1 PE=1 SV=2 - [SBP1_MOUSE]                      | 54.66 | 6  | 21 | 21 | 101 | 1.743  | 1.576 | 1.367 | 1.943 | 359.28 | 54.66 | 37 | 101 | 472  | 52.5  | 6.29 |
| Q922B1   | O-acetyl-ADP-ribose deacetylase MACROD1<br>OS=Mus musculus<br>GN=MacroD1 PE=2 SV=2 - [MACD1_MOUSE]         | 26.63 | 1  | 8  | 8  | 36  | 1.157  | 1.373 | 1.496 | 1.943 | 115.25 | 26.63 | 14 | 36  | 323  | 35.3  | 8.85 |
| O35215   | D-dopachrome decarboxylase OS=Mus musculus<br>GN=Ddt PE=1 SV=3 - [DOPD_MOUSE]                              | 55.93 | 2  | 5  | 5  | 13  | 1.661  | 1.087 | 1.605 | 1.960 | 36.00  | 55.93 | 7  | 13  | 118  | 13.1  | 6.54 |

|          |                                                                                                          |       |   |    |    |      |       |       |       |       |         |       |    |      |     |       |       |
|----------|----------------------------------------------------------------------------------------------------------|-------|---|----|----|------|-------|-------|-------|-------|---------|-------|----|------|-----|-------|-------|
| Q8C838   | Tumor suppressor candidate 5 homolog OS=Mus musculus GN=Tusc5 PE=2 SV=1 - [TUSC5_MOUSE]                  | 17.34 | 1 | 2  | 2  | 3    | 1.267 | 0.788 | 1.943 | 1.961 | 5.51    | 17.34 | 2  | 3    | 173 | 18.7  | 8.00  |
| F6TYB7   | Myelin basic protein (Fragment) OS=Mus musculus GN=Mbp PE=4 SV=1 - [F6TYB7_MOUSE]                        | 84.82 | 9 | 4  | 25 | 2287 | 1.599 | 0.143 | 2.407 | 1.963 | 6437.37 | 84.82 | 42 | 2287 | 191 | 21.2  | 10.73 |
| P0C8K7   | Small integral membrane protein 1 OS=Mus musculus GN=Ssm1 PE=3 SV=1 - [Ssm1_MOUSE]                       | 23.08 | 1 | 1  | 1  | 8    | 0.735 | 0.302 | 1.568 | 1.964 | 29.89   | 23.08 | 2  | 8    | 78  | 8.8   | 8.66  |
| P60202   | Myelin proteolipid protein OS=Mus musculus GN=Ppl1 PE=1 SV=2 - [MYPR_MOUSE]                              | 28.16 | 2 | 12 | 12 | 709  | 0.995 | 0.251 | 1.631 | 1.966 | 2131.39 | 28.16 | 24 | 709  | 277 | 30.1  | 8.35  |
| P31725   | Protein S100-A9 OS=Mus musculus GN=S100a9 PE=1 SV=3 - [S100A9_MOUSE]                                     | 38.94 | 1 | 4  | 4  | 12   | 2.783 | 2.428 | 1.444 | 1.973 | 42.89   | 38.94 | 8  | 12   | 113 | 13.0  | 7.17  |
| D3Z7Y0   | Glutathione peroxidase (Fragment) OS=Mus musculus GN=Gpx3 PE=3 SV=1 - [D3Z7Y0_MOUSE]                     | 35.94 | 2 | 1  | 5  | 16   | 8.522 | 2.701 | 3.840 | 1.984 | 38.69   | 35.94 | 8  | 16   | 217 | 24.0  | 5.66  |
| E9PVD2   | Inter alpha-trypsin inhibitor, heavy chain 4 OS=Mus musculus GN=Itih4 PE=2 SV=1 - [E9PVD2_MOUSE]         | 31.35 | 2 | 1  | 24 | 73   | 1.764 | 1.120 | 1.439 | 1.985 | 186.93  | 31.35 | 39 | 73   | 941 | 104.5 | 6.40  |
| Q9CYL5   | Golgi-associated plant pathogenesis-related protein 1 OS=Mus musculus GN=Glpr2 PE=2 SV=3 - [GAPR1_MOUSE] | 33.12 | 2 | 4  | 4  | 14   | 1.096 | 1.533 | 1.099 | 1.995 | 45.47   | 33.12 | 8  | 14   | 154 | 17.1  | 9.51  |
| P42703-2 | Isoform 2 of Leukemia inhibitory factor receptor OS=Mus musculus GN=Lifr - [LIFR_MOUSE]                  | 15.30 | 1 | 1  | 11 | 20   | 2.130 | 1.457 | 2.757 | 1.998 | 52.73   | 15.30 | 16 | 20   | 719 | 81.2  | 7.05  |
| Q8BV14   | Dihydropteridine reductase OS=Mus musculus GN=Qdpr PE=1 SV=2 - [DHPR_MOUSE]                              | 61.83 | 4 | 11 | 11 | 106  | 0.910 | 0.756 | 1.436 | 2.003 | 402.25  | 61.83 | 20 | 106  | 241 | 25.6  | 7.81  |
| K3W4L8   | Doublecortin domain-containing protein 2C OS=Mus musculus GN=Dcdc2c PE=4 SV=1 - [K3W4L8_MOUSE]           | 4.61  | 2 | 1  | 1  | 1    | 0.964 | 0.638 | 1.345 | 2.004 | 2.78    | 4.61  | 1  | 1    | 347 | 39.3  | 9.39  |
| J3QNP7   | Protein 1700014D04Rik (Fragment) OS=Mus musculus GN=1700014D04Rik PE=4 SV=1 - [J3QNP7_MOUSE]             | 21.21 | 2 | 1  | 1  | 2    | 3.446 | 1.176 | 1.771 | 2.019 | 3.43    | 21.21 | 1  | 2    | 99  | 11.2  | 9.63  |
| D6RDB5   | Rho GTPase-activating protein 23 OS=Mus musculus GN=Arhgap23 PE=2 SV=1 - [Arhgap23_MOUSE]                | 29.34 | 1 | 1  | 15 | 40   | 2.140 | 1.261 | 1.111 | 2.020 | 110.75  | 29.34 | 21 | 40   | 634 | 70.2  | 7.85  |
| Q60771   | Claudin-11 OS=Mus musculus GN=Cldn11 PE=1 SV=1 - [CLD11_MOUSE]                                           | 15.94 | 1 | 5  | 5  | 245  | 0.681 | 0.342 | 1.698 | 2.036 | 514.07  | 15.94 | 9  | 245  | 207 | 22.1  | 7.91  |
| Q61885   | Myelin-oligodendrocyte glycoprotein OS=Mus musculus GN=Mog PE=1 SV=1 - [MOG_MOUSE]                       | 39.43 | 3 | 11 | 12 | 176  | 1.283 | 0.278 | 1.851 | 2.044 | 490.68  | 39.43 | 21 | 176  | 246 | 28.3  | 7.96  |
| Q8CIM3   | D-2-hydroxyglutarate dehydrogenase, mitochondrial OS=Mus musculus GN=D2hgdh PE=2 SV=3 - [D2HGDH_MOUSE]   | 17.94 | 2 | 6  | 6  | 18   | 0.923 | 2.906 | 1.700 | 2.047 | 56.45   | 17.94 | 11 | 18   | 535 | 58.5  | 7.37  |
| P07146   | Anionic trypsin-2 OS=Mus musculus GN=Prss2 PE=2 SV=1 - [TRY2_MOUSE]                                      | 8.13  | 1 | 1  | 1  | 17   | 5.040 | 0.990 | 1.316 | 2.048 | 28.58   | 8.13  | 1  | 17   | 246 | 26.2  | 4.63  |
| Q9DBB4   | N-alpha-acetyltransferase 16, NatA auxiliary subunit OS=Mus musculus GN=Naa16 PE=2 SV=1 - [NAA16_MOUSE]  | 6.83  | 2 | 1  | 6  | 15   | 0.671 | 1.154 | 1.727 | 2.052 | 34.10   | 6.83  | 9  | 15   | 864 | 101.2 | 8.35  |
| Q08642   | Protein-arginine deiminase type-2 OS=Mus musculus GN=Pad2 PE=1 SV=2 - [PAD2_MOUSE]                       | 31.20 | 1 | 18 | 18 | 64   | 1.029 | 0.445 | 1.694 | 2.053 | 215.51  | 31.20 | 32 | 64   | 673 | 76.2  | 5.53  |
| P03987-2 | Isoform 2 of Ig gamma-3 chain C region OS=Mus musculus - [IGHG3_MOUSE]                                   | 17.02 | 2 | 5  | 5  | 20   | 2.042 | 5.040 | 1.235 | 2.054 | 67.75   | 17.02 | 8  | 20   | 329 | 36.2  | 8.27  |
| Q3U2C5-2 | Isoform 2 of E3 ubiquitin-protein ligase RNF149 OS=Mus musculus GN=Rnf149 - [RNF149_MOUSE]               | 6.02  | 2 | 1  | 1  | 2    | 1.133 | 1.389 | 0.847 | 2.055 | 4.51    | 6.02  | 1  | 2    | 249 | 27.6  | 6.84  |
| Q91X72   | Hemopexin OS=Mus musculus GN=Hpex PE=1 SV=2 - [HEMO_MOUSE]                                               | 50.22 | 1 | 23 | 23 | 133  | 3.431 | 2.089 | 1.276 | 2.068 | 359.09  | 50.22 | 43 | 133  | 460 | 51.3  | 7.80  |
| Q61635   | GTP-binding protein OS=Mus musculus GN=Ifi47 PE=2 SV=1 - [Q61635_MOUSE]                                  | 14.52 | 6 | 4  | 7  | 25   | 2.034 | 2.091 | 1.352 | 2.072 | 59.46   | 14.52 | 10 | 25   | 420 | 46.8  | 6.74  |
| P00920   | Carbonic anhydrase 2 OS=Mus musculus GN=Ca2 PE=1 SV=4 - [CAH2_MOUSE]                                     | 65.38 | 1 | 14 | 14 | 421  | 1.284 | 1.229 | 1.543 | 2.076 | 931.03  | 65.38 | 28 | 421  | 260 | 29.0  | 7.01  |
| Q91X56   | Sphingosine 1-phosphate receptor 5 OS=Mus musculus GN=S1pr5 PE=2 SV=1 - [S1PR5_MOUSE]                    | 13.00 | 1 | 3  | 3  | 6    | 1.437 | 0.846 | 2.229 | 2.077 | 18.18   | 13.00 | 5  | 6    | 400 | 42.3  | 9.83  |

|          |                                                                                                                                                                          |       |   |    |    |     |       |       |       |       |         |       |     |     |      |       |      |
|----------|--------------------------------------------------------------------------------------------------------------------------------------------------------------------------|-------|---|----|----|-----|-------|-------|-------|-------|---------|-------|-----|-----|------|-------|------|
| D3YX11   | <p>           GTPase IMAP family member 1 (Fragment)<br/>           OS=Mus musculus<br/>           GN=Gimap1 PE=2 SV=1 - [D3YX11_MOUSE]         </p>                     | 14.86 | 3 | 1  | 1  | 1   | 1.647 | 2.631 | 2.017 | 2.094 | 2.24    | 14.86 | 1   | 1   | 74   | 7.9   | 9.99 |
| Q9Z306   | <p>           Solute carrier family 22 member 4 OS=Mus musculus<br/>           GN=Slc22a4 PE=1 SV=1 - [Q9Z306_MOUSE]         </p>                                        | 7.41  | 1 | 4  | 4  | 9   | 0.793 | 0.635 | 1.142 | 2.094 | 23.59   | 7.41  | 7   | 9   | 553  | 62.2  | 6.40 |
| P13562   | <p>           Progonadoliberin-1 OS=Mus musculus<br/>           GN=Gnrh1 PE=1 SV=1 - [GON1_MOUSE]         </p>                                                           | 15.56 | 1 | 1  | 1  | 4   | 1.164 | 1.063 | 1.078 | 2.106 | 16.83   | 15.56 | 1   | 4   | 90   | 10.3  | 6.52 |
| Q99K67   | <p>           Alpha-aminoadipic semialdehyde synthase, mitochondrial OS=Mus musculus<br/>           GN=Aass PE=2 SV=1 - [AASS_MOUSE]         </p>                        | 17.93 | 2 | 13 | 13 | 24  | 1.004 | 1.804 | 1.817 | 2.107 | 53.99   | 17.93 | 21  | 24  | 926  | 102.9 | 6.87 |
| Q08091   | <p>           Calponin-1 OS=Mus musculus<br/>           GN=Cnn1 PE=2 SV=1 - [CNN1_MOUSE]         </p>                                                                    | 51.52 | 2 | 12 | 16 | 65  | 0.716 | 8.691 | 1.112 | 2.111 | 181.65  | 51.52 | 26  | 65  | 297  | 33.3  | 8.97 |
| O89110   | <p>           Caspase-8 OS=Mus musculus<br/>           GN=Casp8 PE=1 SV=1 - [CASP8_MOUSE]         </p>                                                                   | 4.79  | 1 | 1  | 2  | 2   | 1.371 | 1.383 | 1.848 | 2.119 | 4.96    | 4.79  | 2   | 2   | 480  | 55.3  | 5.25 |
| Q9D873   | <p>           NADH-cytochrome b5 reductase 1 OS=Mus musculus<br/>           GN=Cyb5r1 PE=2 SV=1 - [Q9D873_MOUSE]         </p>                                            | 34.43 | 5 | 11 | 11 | 37  | 0.829 | 1.942 | 1.631 | 2.121 | 95.32   | 34.43 | 17  | 37  | 305  | 34.1  | 8.87 |
| G3UYT0   | <p>           Ubiquitin-conjugating enzyme E2 G2 OS=Mus musculus<br/>           GN=Ube2g2 PE=2 SV=1 - [G3UYT0_MOUSE]         </p>                                        | 68.18 | 1 | 1  | 1  | 1   | 0.665 | 0.130 | 1.782 | 2.131 | 2.47    | 68.18 | 1   | 1   | 44   | 4.9   | 4.44 |
| Q91WH7   | <p>           ATPase, H<sup>+</sup>/K<sup>+</sup> exchanging, gastric, alpha polypeptide OS=Mus musculus<br/>           GN=Atp4a PE=2 SV=1 - [Q91WH7_MOUSE]         </p> | 11.41 | 3 | 4  | 12 | 339 | 1.869 | 1.417 | 2.441 | 2.144 | 802.92  | 11.41 | 22  | 339 | 1025 | 113.0 | 5.81 |
| Q8CFB4   | <p>           Guanylate-binding protein 5 OS=Mus musculus<br/>           GN=Gbp5 PE=1 SV=2 - [GBP5_MOUSE]         </p>                                                   | 6.27  | 1 | 3  | 3  | 4   | 1.783 | 1.421 | 1.745 | 2.157 | 12.34   | 6.27  | 4   | 4   | 590  | 66.9  | 6.09 |
| Q6N546   | <p>           Protein RRP5 homolog OS=Mus musculus<br/>           GN=Pdc11 PE=2 SV=2 - [RRP5_MOUSE]         </p>                                                         | 4.46  | 1 | 4  | 5  | 7   | 1.402 | 0.688 | 1.141 | 2.161 | 21.43   | 4.46  | 6   | 7   | 1862 | 207.6 | 8.75 |
| P0DM40   | <p>           Fer-1-like protein 5 OS=Mus musculus<br/>           GN=Fer1l5 PE=1 SV=1 - [FR1L5_MOUSE]         </p>                                                       | 1.37  | 1 | 3  | 3  | 4   | 1.028 | 1.168 | 2.249 | 2.165 | 2.56    | 1.37  | 3   | 4   | 2038 | 235.7 | 7.83 |
| Q5SW46   | <p>           Protein Lpo OS=Mus musculus<br/>           GN=Lpo PE=2 SV=1 - [Q5SW46_MOUSE]         </p>                                                                  | 1.69  | 1 | 1  | 1  | 1   | 0.619 | 0.297 | 2.322 | 2.170 | 2.12    | 1.69  | 1   | 1   | 710  | 80.1  | 7.11 |
| P06683   | <p>           Complement component C9 OS=Mus musculus<br/>           GN=C9 PE=1 SV=2 - [CO9_MOUSE]         </p>                                                          | 3.65  | 2 | 2  | 2  | 6   | 3.333 | 1.979 | 1.646 | 2.176 | 16.20   | 3.65  | 3   | 6   | 548  | 62.0  | 5.78 |
| P61208   | <p>           ADP-ribosylation factor-like protein 4C OS=Mus musculus<br/>           GN=Arf4c PE=2 SV=1 - [ARL4C_MOUSE]         </p>                                     | 16.15 | 1 | 2  | 3  | 6   | 5.586 | 1.466 | 1.034 | 2.188 | 16.87   | 16.15 | 4   | 6   | 192  | 21.5  | 9.09 |
| O08599-2 | <p>           Isoform 2 of Syntactin-binding protein 1 OS=Mus musculus<br/>           GN=Sxbp1 - [STXB1_MOUSE]         </p>                                              | 75.62 | 1 | 2  | 50 | 837 | 0.828 | 0.294 | 1.290 | 2.190 | 2451.29 | 75.62 | 91  | 837 | 603  | 68.7  | 6.77 |
| Q3UVH3   | <p>           Protein Gm10729 OS=Mus musculus<br/>           GN=Gm10729 PE=2 SV=1 - [Q3UVH3_MOUSE]         </p>                                                          | 13.11 | 1 | 1  | 1  | 1   | 4.703 | 2.519 | 3.974 | 2.190 | 2.97    | 13.11 | 1   | 1   | 122  | 13.3  | 8.10 |
| F6T038   | <p>           Cytoplasmic polyadenylation element-binding protein 3 (Fragment) OS=Mus musculus<br/>           GN=Cpeb3 PE=2 SV=1 - [F6T038_MOUSE]         </p>           | 50.12 | 1 | 1  | 13 | 49  | 1.044 | 0.593 | 1.487 | 2.197 | 117.97  | 50.12 | 22  | 49  | 415  | 46.9  | 6.93 |
| P27005   | <p>           Protein S100-A8 OS=Mus musculus<br/>           GN=S100a8 PE=1 SV=3 - [S100A8_MOUSE]         </p>                                                           | 46.07 | 1 | 2  | 2  | 4   | 3.694 | 2.089 | 1.683 | 2.200 | 17.58   | 46.07 | 3   | 4   | 89   | 10.3  | 5.68 |
| F8VQG7   | <p>           Protein N4bp2 OS=Mus musculus<br/>           GN=N4bp2 PE=4 SV=1 - [F8VQG7_MOUSE]         </p>                                                              | 5.07  | 2 | 5  | 6  | 20  | 2.022 | 2.582 | 1.800 | 2.212 | 27.67   | 5.07  | 7   | 20  | 1678 | 184.6 | 5.62 |
| P70336   | <p>           Rho-associated protein kinase 2 OS=Mus musculus<br/>           GN=Rock2 PE=1 SV=1 - [ROCK2_MOUSE]         </p>                                             | 50.36 | 3 | 1  | 62 | 305 | 0.696 | 3.379 | 1.697 | 2.214 | 838.78  | 50.36 | 107 | 305 | 1388 | 160.5 | 5.99 |
| Q9ET01   | <p>           Glycogen phosphorylase, liver form OS=Mus musculus<br/>           GN=Pygl PE=1 SV=4 - [PYGL_MOUSE]         </p>                                            | 39.88 | 2 | 22 | 32 | 114 | 0.820 | 2.019 | 1.448 | 2.220 | 299.24  | 39.88 | 47  | 114 | 850  | 97.4  | 7.09 |
| Q8JZ11   | <p>           Macrophage galactose N-acetyl-galactosamine specific lectin 2 OS=Mus musculus<br/>           GN=Mjg2 PE=2 SV=1 - [Q8JZ11_MOUSE]         </p>               | 16.27 | 7 | 2  | 2  | 2   | 1.457 | 1.307 | 1.072 | 2.230 | 5.32    | 16.27 | 2   | 2   | 332  | 38.0  | 5.66 |
| L7N451   | <p>           Interferon-induced very large GTPase 1 OS=Mus musculus<br/>           GN=Gvin1 PE=4 SV=1 - [L7N451_MOUSE]         </p>                                     | 2.43  | 3 | 4  | 4  | 8   | 2.830 | 1.465 | 1.787 | 2.264 | 16.34   | 2.43  | 5   | 8   | 2427 | 280.6 | 6.57 |
| Q9Z0M1   | <p>           Enamel matrix serine proteinase 1 (Precursor) OS=Mus musculus<br/>           GN=Kik4 PE=2 SV=1 - [Q9Z0M1_MOUSE]         </p>                               | 9.41  | 1 | 1  | 1  | 10  | 1.537 | 1.217 | 1.858 | 2.283 | 0.00    | 9.41  | 1   | 10  | 255  | 27.5  | 6.16 |

|          |                                                                                                                                       |       |   |    |     |      |       |       |       |       |         |       |     |      |      |       |       |
|----------|---------------------------------------------------------------------------------------------------------------------------------------|-------|---|----|-----|------|-------|-------|-------|-------|---------|-------|-----|------|------|-------|-------|
| P35487   | Pyruvate dehydrogenase E1 component subunit alpha, testis-specific form, mitochondrial OS=Musculus GN=Pdha2 PE=2 SV=1 - [ODPAT_MOUSE] | 8.95  | 1 | 2  | 4   | 26   | 1.342 | 1.408 | 1.924 | 2.288 | 65.82   | 8.95  | 7   | 26   | 391  | 43.4  | 8.50  |
| B1AW21   | Myotubularin OS=Musculus GN=Mtm1 PE=4 SV=1 - [B1AW21_MOUSE]                                                                           | 12.59 | 3 | 6  | 6   | 10   | 1.162 | 0.837 | 1.107 | 2.294 | 24.63   | 12.59 | 9   | 10   | 572  | 65.9  | 7.77  |
| P70121   | Zinc fingers and homeobox protein 1 OS=Musculus GN=Zfx1 PE=1 SV=2 - [ZHx1_MOUSE]                                                      | 5.04  | 2 | 3  | 4   | 7    | 2.505 | 2.488 | 2.296 | 2.294 | 12.09   | 5.04  | 6   | 7    | 873  | 97.5  | 5.99  |
| P70689   | Gap junction beta-6 protein OS=Musculus GN=Gjb6 PE=1 SV=1 - [CXB6_MOUSE]                                                              | 10.73 | 2 | 2  | 2   | 3    | 0.894 | 1.007 | 1.661 | 2.312 | 8.91    | 10.73 | 3   | 3    | 261  | 30.3  | 8.38  |
| Q6TL19   | Guanylate cyclase 2G OS=Musculus GN=Gucy2g PE=1 SV=1 - [GUC2G_MOUSE]                                                                  | 2.64  | 1 | 2  | 3   | 5    | 3.657 | 1.524 | 2.036 | 2.322 | 12.58   | 2.64  | 3   | 5    | 1100 | 122.5 | 6.39  |
| P61953   | Guanine nucleotide-binding protein G(I)/G(S)/G(O) subunit gamma-11 OS=Musculus GN=Gng11 PE=1 SV=1 - [GNG11_MOUSE]                     | 23.29 | 2 | 1  | 2   | 4    | 2.963 | 0.616 | 2.320 | 2.342 | 7.21    | 23.29 | 3   | 4    | 73   | 8.5   | 5.54  |
| P10637   | Microtubule-associated protein tau OS=Musculus GN=Mapt PE=1 SV=3 - [TAU_MOUSE]                                                        | 51.71 | 5 | 7  | 40  | 555  | 2.345 | 0.499 | 3.041 | 2.344 | 1524.33 | 51.71 | 72  | 555  | 733  | 76.2  | 6.79  |
| Q64332   | Synapsin-2 OS=Musculus GN=Syn2 PE=1 SV=2 - [SYN2_MOUSE]                                                                               | 58.02 | 1 | 2  | 26  | 740  | 0.612 | 4.448 | 3.077 | 2.348 | 2248.94 | 58.02 | 48  | 740  | 586  | 63.3  | 8.43  |
| Q62095   | ATP-dependent RNA helicase DDX3Y OS=Musculus GN=Ddx3y PE=1 SV=2 - [DDX3Y_MOUSE]                                                       | 44.68 | 1 | 3  | 30  | 153  | 1.648 | 1.639 | 1.938 | 2.366 | 445.78  | 44.68 | 50  | 153  | 658  | 73.4  | 7.53  |
| Q6GTM0   | Irf2 protein OS=Musculus GN=Irf2 PE=2 SV=1 - [Q6GTM0_MOUSE]                                                                           | 4.26  | 2 | 1  | 2   | 2    | 1.166 | 1.943 | 1.175 | 2.378 | 5.25    | 4.26  | 2   | 2    | 470  | 54.7  | 7.43  |
| E0CZG7   | Glycerate kinase (Fragment) OS=Musculus GN=Glyck PE=2 SV=1 - [E0CZG7_MOUSE]                                                           | 20.63 | 3 | 2  | 2   | 4    | 1.147 | 0.347 | 3.302 | 2.380 | 14.27   | 20.63 | 3   | 4    | 126  | 13.5  | 10.55 |
| Q9R118   | Serine protease HTRA1 OS=Musculus GN=Htra1 PE=1 SV=2 - [HTRA1_MOUSE]                                                                  | 37.50 | 1 | 12 | 12  | 34   | 1.465 | 1.180 | 2.400 | 2.386 | 91.09   | 37.50 | 22  | 34   | 480  | 51.2  | 7.65  |
| Q80VQ0   | Aldehyde dehydrogenase family 3 member B1 OS=Musculus GN=Aldh3b1 PE=2 SV=1 - [AL3B1_MOUSE]                                            | 25.21 | 3 | 7  | 9   | 40   | 1.111 | 1.011 | 1.807 | 2.400 | 136.92  | 25.21 | 18  | 40   | 468  | 52.3  | 7.55  |
| E9PUK2   | Uncharacterized aarF domain-containing protein kinase 5 OS=Musculus GN=Adck5 PE=2 SV=1 - [E9PUK2_MOUSE]                               | 7.39  | 4 | 4  | 4   | 6    | 1.038 | 1.684 | 1.833 | 2.409 | 12.86   | 7.39  | 6   | 6    | 582  | 66.6  | 8.76  |
| Q61176   | Arginase-1 OS=Musculus GN=Arg1 PE=1 SV=1 - [ARG1_MOUSE]                                                                               | 37.15 | 1 | 11 | 11  | 33   | 1.999 | 1.087 | 2.227 | 2.411 | 80.63   | 37.15 | 15  | 33   | 323  | 34.8  | 7.01  |
| Q6X893   | Choline transporter-like protein 1 OS=Musculus GN=Slc44a1 PE=1 SV=3 - [SLC44A1_MOUSE]                                                 | 16.39 | 5 | 1  | 11  | 43   | 0.653 | 0.330 | 2.112 | 2.451 | 133.62  | 16.39 | 19  | 43   | 653  | 73.0  | 8.75  |
| A2A998   | Complement component C8 alpha chain OS=Musculus GN=C8a PE=2 SV=1 - [A2A998_MOUSE]                                                     | 3.68  | 3 | 1  | 1   | 3    | 1.785 | 1.804 | 3.099 | 2.456 | 12.67   | 3.68  | 1   | 3    | 543  | 61.0  | 6.06  |
| Q4U456   | Xin actin-binding repeat-containing protein 2 OS=Musculus GN=Xirp2 PE=1 SV=1 - [XIRP2_MOUSE]                                          | 1.48  | 3 | 4  | 6   | 7    | 1.746 | 2.288 | 2.264 | 2.470 | 14.97   | 1.48  | 7   | 7    | 3784 | 428.0 | 6.18  |
| Q99LG1   | Transmembrane protein 51 OS=Musculus GN=Tmem51 PE=1 SV=1 - [TMM51_MOUSE]                                                              | 7.23  | 1 | 1  | 1   | 2    | 0.673 | 1.221 | 1.831 | 2.481 | 9.17    | 7.23  | 2   | 2    | 249  | 27.4  | 6.95  |
| Q62261-2 | Isoform 2 of Spectrin beta chain, non-erythrocytic 1 OS=Musculus GN=Sptbn1 [SPTB2_MOUSE]                                              | 73.26 | 1 | 1  | 151 | 1979 | 1.204 | 0.497 | 3.122 | 2.487 | 5527.51 | 73.26 | 276 | 1979 | 2154 | 251.0 | 5.54  |
| P31532   | Serum amyloid A-4 protein OS=Musculus GN=Saa4 PE=1 SV=2 - [SAA4_MOUSE]                                                                | 22.31 | 1 | 2  | 2   | 4    | 1.857 | 6.658 | 1.238 | 2.489 | 11.18   | 22.31 | 3   | 4    | 130  | 15.1  | 9.26  |
| P97306   | SH3 and cysteine-rich domain-containing protein OS=Musculus GN=Stac PE=2 SV=1 - [STAC_MOUSE]                                          | 5.71  | 1 | 3  | 3   | 4    | 1.090 | 1.396 | 1.408 | 2.519 | 8.72    | 5.71  | 4   | 4    | 403  | 44.3  | 7.81  |
| Q9D2P8   | Myelin-associated oligodendrocyte basic protein OS=Musculus GN=Mobp PE=2 SV=1 - [MOBP_MOUSE]                                          | 42.94 | 5 | 8  | 8   | 62   | 0.593 | 0.401 | 2.181 | 2.538 | 148.51  | 42.94 | 12  | 62   | 170  | 19.2  | 11.14 |
| Q9D8T9   | Dimethylglycine dehydrogenase, mitochondrial OS=Musculus GN=Dmgdh PE=1 SV=1 - [DMGDH_MOUSE]                                           | 3.11  | 1 | 2  | 2   | 3    | 1.215 | 0.619 | 2.136 | 2.549 | 3.53    | 3.11  | 3   | 3    | 869  | 97.2  | 7.88  |

|          |                                                                                                    |       |   |    |     |      |       |        |       |       |         |       |     |      |      |       |       |
|----------|----------------------------------------------------------------------------------------------------|-------|---|----|-----|------|-------|--------|-------|-------|---------|-------|-----|------|------|-------|-------|
| P40237   | CD82 antigen OS=Mus musculus GN=Cd82 PE=1 SV=1 - [CD82_MOUSE]                                      | 16.54 | 3 | 5  | 5   | 37   | 1.319 | 0.623  | 2.382 | 2.557 | 102.46  | 16.54 | 10  | 37   | 266  | 29.6  | 5.02  |
| H3B397   | Tubulointerstitial nephritis antigen-like OS=Mus musculus GN=Tinag1 PE=2 SV=1 - [TINAG1_MOUSE]     | 28.97 | 3 | 9  | 9   | 29   | 1.137 | 4.218  | 2.026 | 2.568 | 82.64   | 28.97 | 14  | 29   | 435  | 49.2  | 7.15  |
| Q8K0E8   | Fibrinogen beta chain OS=Mus musculus GN=Fgb PE=2 SV=1 - [FIBB_MOUSE]                              | 51.98 | 2 | 22 | 23  | 146  | 1.855 | 1.624  | 1.287 | 2.607 | 474.52  | 51.98 | 43  | 146  | 481  | 54.7  | 7.08  |
| Q8C8R3-5 | Isoform 5 of Ankyrin-2 OS=Mus musculus GN=Ank2 - [ANK2_MOUSE]                                      | 53.88 | 3 | 1  | 167 | 1338 | 1.432 | 1.636  | 1.930 | 2.608 | 3864.34 | 53.88 | 293 | 1338 | 3844 | 420.2 | 5.12  |
| Q9WUH7   | Semaphorin-4G OS=Mus musculus GN=Sema4g PE=1 SV=1 - [SEM4G_MOUSE]                                  | 3.35  | 1 | 2  | 2   | 5    | 0.776 | 0.585  | 0.663 | 2.648 | 10.76   | 3.35  | 3   | 5    | 837  | 92.3  | 7.94  |
| P13634   | Carbonic anhydrase 1 OS=Mus musculus GN=Ca1 PE=2 SV=4 - [CAH1_MOUSE]                               | 54.02 | 2 | 9  | 9   | 29   | 2.089 | 3.670  | 1.272 | 2.660 | 85.98   | 54.02 | 16  | 29   | 261  | 28.3  | 6.96  |
| D3YZV8   | Coiled-coil domain-containing protein 8 homolog OS=Mus musculus GN=Ccdc8 PE=3 SV=2 - [CCDC8_MOUSE] | 1.17  | 1 | 1  | 1   | 4    | 1.755 | 3.801  | 2.546 | 2.689 | 9.23    | 1.17  | 1   | 4    | 685  | 73.9  | 9.09  |
| Q9D8M3   | Heme transporter HRG1 OS=Mus musculus GN=Slc48a1 PE=2 SV=1 - [HRG1_MOUSE]                          | 12.33 | 2 | 2  | 2   | 2    | 4.082 | 1.476  | 1.735 | 2.708 | 3.95    | 12.33 | 2   | 2    | 146  | 16.5  | 9.45  |
| Q8BIR-2  | Isoform 2 of Protein asteroid homolog 1 OS=Mus musculus GN=Aste1 - [ASTE1_MOUSE]                   | 5.24  | 4 | 2  | 4   | 7    | 1.050 | 0.169  | 1.843 | 2.714 | 12.91   | 5.24  | 5   | 7    | 611  | 69.0  | 7.91  |
| Q9D8H7   | Metalloendopeptidase OMA1, mitochondrial OS=Mus musculus GN=Oma1 PE=2 SV=1 - [OMAI_MOUSE]          | 5.18  | 1 | 3  | 3   | 3    | 2.021 | 1.781  | 1.599 | 2.731 | 4.11    | 5.18  | 3   | 3    | 521  | 58.8  | 9.39  |
| Q9Z0E6   | Interferon-induced guanylate-binding protein 2 OS=Mus musculus GN=Gbp2 PE=1 SV=1 - [GBP2_MOUSE]    | 17.15 | 3 | 9  | 9   | 16   | 0.943 | 1.862  | 1.306 | 2.732 | 44.11   | 17.15 | 12  | 16   | 589  | 66.7  | 5.71  |
| B1AUC7   | Rho GTPase-activating protein 36 OS=Mus musculus GN=Arhgap36 PE=2 SV=1 - [ARHAP36_MOUSE]           | 2.37  | 1 | 1  | 1   | 1    | 7.799 | 0.888  | 1.114 | 2.831 | 2.52    | 2.37  | 1   | 1    | 590  | 66.6  | 6.06  |
| Q9QZ85   | Interferon-inducible GTPase 1 OS=Mus musculus GN=Iigp1 PE=1 SV=2 - [IIGP1_MOUSE]                   | 13.56 | 1 | 4  | 5   | 8    | 1.162 | 1.376  | 1.568 | 2.847 | 18.07   | 13.56 | 8   | 8    | 413  | 47.5  | 6.33  |
| Q6P3Z8   | Histone acetyltransferase KAT2A OS=Mus musculus GN=Kat2a PE=2 SV=1 - [Q6P3Z8_MOUSE]                | 7.72  | 2 | 6  | 6   | 7    | 1.167 | 1.252  | 1.039 | 2.892 | 12.37   | 7.72  | 7   | 7    | 829  | 93.3  | 9.07  |
| D3YXD5   | Protein Ugt2b36 (Fragment) OS=Mus musculus GN=Ugt2b36 PE=2 SV=1 - [UGT2B36_MOUSE]                  | 5.05  | 4 | 1  | 1   | 1    | 1.825 | 1.472  | 2.079 | 2.923 | 2.20    | 5.05  | 1   | 1    | 198  | 22.1  | 7.02  |
| Q8R1A8   | Ornithine carbamoyltransferase, mitochondrial OS=Mus musculus GN=Otc PE=2 SV=1 - [Q8R1A8_MOUSE]    | 9.69  | 2 | 3  | 3   | 10   | 1.595 | 1.271  | 1.957 | 2.935 | 26.69   | 9.69  | 5   | 10   | 351  | 39.3  | 8.66  |
| P49429   | 4-hydroxyphenylpyruvate dioxygenase OS=Mus musculus GN=Hpd PE=1 SV=3 - [HPPD_MOUSE]                | 16.03 | 3 | 6  | 6   | 8    | 1.369 | 1.090  | 1.842 | 2.946 | 22.98   | 16.03 | 8   | 8    | 393  | 45.0  | 7.06  |
| Q8CB59-2 | Isoform 2 of Protein FAM161B OS=Mus musculus GN=Fam161b - [F161B_MOUSE]                            | 5.54  | 2 | 2  | 2   | 2    | 1.615 | 3.370  | 1.896 | 2.955 | 3.45    | 5.54  | 2   | 2    | 487  | 55.6  | 10.07 |
| Q99K47   | Fibrinogen, alpha polypeptide OS=Mus musculus GN=Fga PE=2 SV=1 - [Q99K47_MOUSE]                    | 49.55 | 2 | 22 | 23  | 134  | 1.887 | 1.697  | 1.472 | 2.958 | 369.83  | 49.55 | 41  | 134  | 557  | 61.3  | 7.47  |
| P12399   | Protein CTLA-2-alpha OS=Mus musculus GN=Ctla2a PE=2 SV=2 - [CTLA2_MOUSE]                           | 18.25 | 2 | 2  | 2   | 4    | 2.695 | 1.101  | 3.262 | 3.012 | 11.36   | 18.25 | 2   | 4    | 137  | 15.9  | 5.34  |
| Q78JT3   | 3-hydroxyanthranilate 3,4-dioxygenase OS=Mus musculus GN=Haoa PE=1 SV=1 - [3HAO_MOUSE]             | 23.78 | 1 | 6  | 6   | 9    | 1.760 | 1.031  | 2.058 | 3.019 | 24.11   | 23.78 | 9   | 9    | 286  | 32.8  | 6.54  |
| Q6TA13   | Kinesin-like protein KIF1A OS=Mus musculus GN=Kif1a PE=2 SV=1 - [Q6TA13_MOUSE]                     | 41.17 | 4 | 1  | 56  | 229  | 1.046 | 1.546  | 1.488 | 3.031 | 696.81  | 41.17 | 97  | 229  | 1698 | 191.7 | 6.23  |
| Q8VCM7   | Fibrinogen gamma chain OS=Mus musculus GN=Fgg PE=2 SV=1 - [FIBG_MOUSE]                             | 48.39 | 1 | 17 | 17  | 78   | 2.183 | 1.581  | 1.390 | 3.036 | 230.71  | 48.39 | 31  | 78   | 436  | 49.4  | 5.86  |
| Q8BID8   | F-box/LRR-repeat protein 14 OS=Mus musculus GN=Fbx14 PE=2 SV=1 - [FXL14_MOUSE]                     | 8.00  | 1 | 1  | 2   | 3    | 3.345 | 11.362 | 9.643 | 3.083 | 2.60    | 8.00  | 2   | 3    | 400  | 43.8  | 8.65  |
| E9QAK1   | Protein 2810007J24Rik (Fragment) OS=Mus musculus GN=2810007J24Rik PE=2 SV=1 - [E9QAK1_MOUSE]       | 13.76 | 2 | 2  | 2   | 4    | 1.390 | 1.192  | 1.927 | 3.095 | 6.42    | 13.76 | 3   | 4    | 189  | 22.4  | 8.66  |
| Q61169-2 | Isoform 2 of Transcription factor GATA-6 OS=Mus musculus GN=Gata6 - [GATA6_MOUSE]                  | 3.16  | 2 | 1  | 1   | 1    | 1.107 | 1.543  | 1.196 | 3.150 | 3.09    | 3.16  | 1   | 1    | 443  | 44.7  | 8.91  |



|          |                                                                                                                               |       |   |    |    |     |        |       |       |       |        |       |    |     |      |       |       |
|----------|-------------------------------------------------------------------------------------------------------------------------------|-------|---|----|----|-----|--------|-------|-------|-------|--------|-------|----|-----|------|-------|-------|
| Q3UUX8   | Protein 4732440D04Rik (Fragment) OS=Mus musculus GN=4732440D04Rik PE=2 SV=1 - [Q3UUX8_MOUSE]                                  | 14.60 | 1 | 1  | 1  | 1   | 0.560  | 1.832 | 3.113 | 3.173 | 2.39   | 14.60 | 1  | 1   | 226  | 23.7  | 12.03 |
| Q64345   | Interferon-induced protein with tetratricopeptide repeats 3 OS=Mus musculus GN=Ifit3 PE=2 SV=1 - [IFIT3_MOUSE]                | 23.08 | 2 | 8  | 9  | 13  | 1.093  | 1.200 | 1.606 | 3.239 | 44.62  | 23.08 | 13 | 13  | 403  | 47.2  | 5.64  |
| F6RLA6   | Ataxin-7-like protein 1 (Fragment) OS=Mus musculus GN=Abxn71l PE=2 SV=1 - [F6RLA6_MOUSE]                                      | 14.69 | 4 | 1  | 1  | 2   | 13.365 | 4.460 | 4.671 | 3.259 | 5.68   | 14.69 | 1  | 2   | 143  | 15.0  | 10.87 |
| Q6DFX2   | Anthrax toxin receptor 2 OS=Mus musculus GN=Antxr2 PE=2 SV=1 - [ANTR2_MOUSE]                                                  | 6.37  | 1 | 1  | 1  | 1   | 0.853  | 1.253 | 3.156 | 3.263 | 0.00   | 6.37  | 1  | 1   | 487  | 53.2  | 7.56  |
| P16331   | Phenylalanine-4-hydroxylase OS=Mus musculus GN=Pah PE=1 SV=4 - [PH4H_MOUSE]                                                   | 4.19  | 2 | 2  | 2  | 3   | 0.819  | 1.082 | 2.275 | 3.276 | 10.46  | 4.19  | 3  | 3   | 453  | 51.9  | 6.30  |
| E9PY03   | Protein Tstd1 OS=Mus musculus GN=Tstd1 PE=4 SV=1 - [E9PY03_MOUSE]                                                             | 35.34 | 1 | 2  | 2  | 6   | 5.949  | 1.812 | 1.105 | 3.318 | 22.78  | 35.34 | 3  | 6   | 133  | 14.3  | 8.48  |
| P11714   | Cytochrome P450 2D9 OS=Mus musculus GN=Cyp2d9 PE=1 SV=2 - [CP2D9_MOUSE]                                                       | 15.08 | 1 | 5  | 5  | 8   | 1.161  | 1.099 | 2.342 | 3.527 | 13.94  | 15.08 | 8  | 8   | 504  | 56.9  | 6.21  |
| P12246   | Serum amyloid P-component OS=Mus musculus GN=Apcs PE=1 SV=2 - [SAMP_MOUSE]                                                    | 13.39 | 1 | 2  | 2  | 10  | 1.905  | 1.815 | 1.379 | 3.678 | 26.03  | 13.39 | 3  | 10  | 224  | 26.2  | 6.35  |
| Q9DCV7   | Keratin, type II cytoskeletal 7 OS=Mus musculus GN=Krt7 PE=1 SV=1 - [K2C7_MOUSE]                                              | 8.32  | 3 | 1  | 4  | 33  | 1.146  | 2.281 | 2.483 | 3.689 | 65.85  | 8.32  | 7  | 33  | 457  | 50.7  | 5.87  |
| B2RVA4   | Guanine nucleotide-binding protein subunit gamma OS=Mus musculus GN=Gm5741 PE=3 SV=1 - [B2RVA4_MOUSE]                         | 23.61 | 2 | 1  | 2  | 3   | 0.836  | 0.244 | 1.183 | 3.709 | 6.12   | 23.61 | 3  | 3   | 72   | 7.7   | 9.35  |
| D3YU60   | Microsomal glutathione S-transferase 1 OS=Mus musculus GN=Mgst1 PE=2 SV=1 - [D3YU60_MOUSE]                                    | 45.10 | 4 | 3  | 3  | 5   | 1.389  | 0.948 | 1.782 | 3.830 | 11.07  | 45.10 | 4  | 5   | 102  | 11.7  | 8.48  |
| Q9D9R9   | Protein FAM186A OS=Mus musculus GN=FAM186A PE=2 SV=2 - [F186A_MOUSE]                                                          | 1.01  | 3 | 1  | 2  | 5   | 2.027  | 1.332 | 2.047 | 3.841 | 0.00   | 1.01  | 2  | 5   | 1790 | 194.4 | 6.34  |
| P20917-2 | Isoform S-MAG of Myelin-associated glycoprotein OS=Mus musculus GN=Mag - [MAG_MOUSE]                                          | 27.84 | 1 | 1  | 15 | 164 | 1.449  | 0.275 | 3.384 | 3.841 | 505.22 | 27.84 | 27 | 164 | 582  | 64.2  | 5.08  |
| Q9D154   | Leukocyte elastase inhibitor A OS=Mus musculus GN=Serpinb1a PE=1 SV=1 - [Q9D154_MOUSE]                                        | 48.02 | 5 | 13 | 18 | 92  | 1.732  | 0.888 | 2.987 | 3.950 | 329.42 | 48.02 | 34 | 92  | 379  | 42.5  | 6.21  |
| Q9QXJ2   | Signal transducer and activator of transcription 2 OS=Mus musculus GN=Stat2 PE=1 SV=1 - [Q9QXJ2_MOUSE]                        | 5.75  | 3 | 5  | 5  | 9   | 1.466  | 1.203 | 1.653 | 3.970 | 22.32  | 5.75  | 9  | 9   | 922  | 105.3 | 5.21  |
| P35428   | Transcription factor HES-1 OS=Mus musculus GN=Hes1 PE=1 SV=1 - [HES1_MOUSE]                                                   | 5.67  | 1 | 1  | 1  | 1   | 5.264  | 2.008 | 2.355 | 4.065 | 3.29   | 5.67  | 1  | 1   | 282  | 29.7  | 9.61  |
| Q63880-2 | Isoform 2 of Carboxylesterase 3A OS=Mus musculus GN=Ces3a - [Q63880_MOUSE]                                                    | 8.02  | 6 | 3  | 4  | 19  | 1.358  | 0.769 | 2.319 | 4.211 | 57.41  | 8.02  | 7  | 19  | 524  | 57.8  | 5.63  |
| P16015   | Carbonic anhydrase 3 OS=Mus musculus GN=Ca3 PE=1 SV=3 - [CAH3_MOUSE]                                                          | 48.08 | 1 | 10 | 10 | 35  | 2.717  | 2.810 | 2.301 | 4.231 | 90.86  | 48.08 | 17 | 35  | 260  | 29.3  | 7.37  |
| Q64282   | Interferon-induced protein with tetratricopeptide repeats 1 OS=Mus musculus GN=Ifit1 PE=1 SV=2 - [IFIT1_MOUSE]                | 12.96 | 4 | 3  | 3  | 5   | 0.551  | 1.967 | 1.991 | 4.248 | 10.03  | 12.96 | 5  | 5   | 463  | 53.7  | 7.52  |
| Q8BPC6   | Probable isocitrate dehydrogenase [NAD] gamma 2, mitochondrial OS=Mus musculus PE=1 SV=1 - [IDHG2_MOUSE]                      | 7.32  | 1 | 1  | 1  | 3   | 1.793  | 0.747 | 6.843 | 4.366 | 0.00   | 7.32  | 1  | 3   | 396  | 43.8  | 8.37  |
| Q9D035   | Sodium/potassium-transporting ATPase subunit beta-1-interacting protein 1 OS=Mus musculus GN=Nkain1 PE=1 SV=2 - [NKAI1_MOUSE] | 6.28  | 1 | 1  | 1  | 2   | 1.975  | 1.002 | 1.826 | 4.524 | 4.12   | 6.28  | 2  | 2   | 207  | 23.5  | 5.71  |
| Q60590   | Alpha-1-acid glycoprotein 1 OS=Mus musculus GN=Orm1 PE=1 SV=1 - [A1AG1_MOUSE]                                                 | 20.77 | 1 | 3  | 5  | 10  | 5.144  | 3.352 | 3.150 | 4.572 | 28.25  | 20.77 | 8  | 10  | 207  | 23.9  | 5.85  |
| P23927   | Alpha-crystallin B chain OS=Mus musculus GN=Cryab PE=1 SV=2 - [CRYAB_MOUSE]                                                   | 57.14 | 1 | 9  | 9  | 48  | 2.002  | 0.853 | 4.870 | 4.655 | 137.40 | 57.14 | 16 | 48  | 175  | 20.1  | 7.33  |
| Q91XL1   | Leucine-rich HEV glycoprotein (Precursor) OS=Mus musculus GN=Lrg1 PE=2 SV=1 - [Q91XL1_MOUSE]                                  | 23.68 | 1 | 7  | 8  | 30  | 3.997  | 2.711 | 2.418 | 4.684 | 87.07  | 23.68 | 15 | 30  | 342  | 37.4  | 6.61  |
| J3J528   | Protein Wnt-9a OS=Mus musculus GN=Wnt9a PE=4 SV=1 - [J3J528_MOUSE]                                                            | 2.47  | 2 | 1  | 1  | 1   | 1.114  | 1.306 | 1.245 | 4.686 | 0.00   | 2.47  | 1  | 1   | 365  | 40.4  | 8.65  |

|          |                                                                                                                              |       |   |    |    |     |        |        |        |        |        |       |    |     |      |       |      |
|----------|------------------------------------------------------------------------------------------------------------------------------|-------|---|----|----|-----|--------|--------|--------|--------|--------|-------|----|-----|------|-------|------|
| Q8VC12   | Urocanate hydratase<br>OS=Mus musculus<br>GN=Uroc1 PE=2 SV=2 -<br>[HUTU_MOUSE]                                               | 2.07  | 2 | 1  | 1  | 2   | 13.452 | 1.902  | 3.704  | 4.770  | 5.07   | 2.07  | 2  | 2   | 676  | 74.5  | 7.53 |
| Q64374   | Regucalcin OS=Mus musculus GN=Rgn PE=1 SV=1 - [RGN_MOUSE]                                                                    | 17.06 | 1 | 4  | 4  | 24  | 2.126  | 1.199  | 2.533  | 4.934  | 75.05  | 17.06 | 8  | 24  | 299  | 33.4  | 5.34 |
| A2AKN9   | Major urinary protein 2<br>OS=Mus musculus<br>GN=Mup2 PE=2 SV=1 -<br>[A2AKN9_MOUSE]                                          | 53.89 | 8 | 2  | 8  | 26  | 3.596  | 1.994  | 3.437  | 5.426  | 79.82  | 53.89 | 14 | 26  | 180  | 20.6  | 5.01 |
| E9Q1R2   | Probable 4-hydroxy-2-oxoglutarate aldolase, mitochondrial OS=Mus musculus GN=Hoga1 PE=2 SV=1 -                               | 9.49  | 2 | 1  | 1  | 1   | 1.551  | 1.372  | 3.211  | 5.704  | 4.73   | 9.49  | 1  | 1   | 158  | 17.4  | 8.18 |
| Q91X83   | S-adenosylmethionine synthase isoform type-1<br>OS=Mus musculus<br>GN=Mat1a PE=2 SV=1 -<br>[METK1_MOUSE]                     | 10.86 | 1 | 3  | 4  | 9   | 1.263  | 0.704  | 3.444  | 5.725  | 22.75  | 10.86 | 5  | 9   | 396  | 43.5  | 5.82 |
| Q8C196   | Carbamoyl-phosphate synthase [ammonia], mitochondrial OS=Mus musculus GN=Cps1 PE=1 SV=2 - [CPSM_MOUSE]                       | 28.73 | 1 | 36 | 39 | 110 | 1.458  | 1.075  | 3.626  | 5.780  | 314.35 | 28.73 | 65 | 110 | 1500 | 164.5 | 6.92 |
| O35490   | Betaine-homocysteine S-methyltransferase 1<br>OS=Mus musculus<br>GN=Bhmt PE=2 SV=1 -<br>[BHMT1_MOUSE]                        | 32.92 | 2 | 10 | 10 | 39  | 1.534  | 0.999  | 4.626  | 6.258  | 126.35 | 32.92 | 19 | 39  | 407  | 45.0  | 7.90 |
| Q9QXD6   | Fructose-1,6-bisphosphatase 1 OS=Mus musculus GN=Fbp1 PE=2 SV=3 - [F16P1_MOUSE]                                              | 14.50 | 4 | 4  | 4  | 8   | 3.125  | 1.314  | 4.124  | 6.536  | 33.65  | 14.50 | 6  | 8   | 338  | 36.9  | 6.57 |
| Q91JT0   | RNA 3'-terminal phosphate cyclase-like protein<br>OS=Mus musculus<br>GN=Rcl1 PE=2 SV=1 -<br>[RCL1_MOUSE]                     | 4.02  | 1 | 1  | 1  | 1   | 1.081  | 1.219  | 1.496  | 6.561  | 2.85   | 4.02  | 1  | 1   | 373  | 40.8  | 9.26 |
| Q9ESM3   | Hyaluronan and proteoglycan link protein 2<br>OS=Mus musculus<br>GN=Hapl2 PE=1 SV=1 -<br>[HPLN2_MOUSE]                       | 28.45 | 1 | 8  | 8  | 25  | 1.255  | 0.697  | 4.037  | 6.604  | 71.35  | 28.45 | 13 | 25  | 341  | 37.9  | 9.09 |
| P11672   | Neutrophil gelatinase-associated lipocalin<br>OS=Mus musculus<br>GN=Lcn2 PE=1 SV=1 -<br>[NGAL_MOUSE]                         | 23.00 | 1 | 4  | 4  | 7   | 1.364  | 1.389  | 3.962  | 7.083  | 17.80  | 23.00 | 6  | 7   | 200  | 22.9  | 8.81 |
| Q8K4J0-3 | Isoform 3 of Protein artemis OS=Mus musculus GN=Dcre1c - [DCR1C_MOUSE]                                                       | 6.98  | 5 | 2  | 3  | 6   | 1.172  | 14.498 | 20.583 | 7.377  | 14.60  | 6.98  | 3  | 6   | 473  | 54.2  | 8.56 |
| Q80TG1-4 | Isoform 4 of KAT8 regulatory NSL complex subunit 1 OS=Mus musculus GN=Kansl1 - [KANL1_MOUSE]                                 | 5.12  | 5 | 1  | 2  | 2   | 1.409  | 2.628  | 8.816  | 7.638  | 6.05   | 5.12  | 2  | 2   | 430  | 46.2  | 7.58 |
| Q91Y97   | Fructose-bisphosphate aldolase B OS=Mus musculus GN=Aldob PE=1 SV=3 - [ALDOB_MOUSE]                                          | 36.54 | 1 | 12 | 13 | 87  | 1.841  | 1.077  | 5.378  | 7.660  | 221.31 | 36.54 | 23 | 87  | 364  | 39.5  | 8.27 |
| B1AR34   | Asialoglycoprotein receptor 1 OS=Mus musculus GN=Asgr1 PE=4 SV=1 - [B1AR34_MOUSE]                                            | 4.31  | 2 | 1  | 1  | 2   | 0.893  | 0.775  | 3.818  | 7.804  | 4.59   | 4.31  | 2  | 2   | 255  | 29.4  | 6.02 |
| A2AI57   | Transient receptor potential cation channel subfamily M member 7<br>OS=Mus musculus<br>GN=Trpm7 PE=2 SV=1 -<br>[TRPM7_MOUSE] | 3.22  | 2 | 3  | 5  | 8   | 1.096  | 1.432  | 0.962  | 7.909  | 12.72  | 3.22  | 5  | 8   | 1862 | 212.2 | 7.80 |
| B6VJS2   | 5-hydroxytryptamine receptor 7 OS=Mus musculus GN=Htr7 PE=2 SV=1 - [B6VJS2_MOUSE]                                            | 3.68  | 3 | 2  | 2  | 3   | 1.727  | 0.602  | 5.353  | 8.890  | 5.51   | 3.68  | 2  | 3   | 435  | 48.5  | 8.76 |
| Q61646   | Haptoglobin OS=Mus musculus GN=Hp PE=1 SV=1 - [HPT_MOUSE]                                                                    | 34.01 | 1 | 12 | 12 | 34  | 2.324  | 3.005  | 7.284  | 9.414  | 99.91  | 34.01 | 20 | 34  | 347  | 38.7  | 6.29 |
| Q9QXF8   | Glycine N-methyltransferase OS=Mus musculus GN=Gnmt PE=1 SV=3 - [GNMT_MOUSE]                                                 | 12.63 | 1 | 2  | 2  | 14  | 3.932  | 1.115  | 5.973  | 9.609  | 58.40  | 12.63 | 4  | 14  | 293  | 32.7  | 7.44 |
| G3UW77   | Protein inscuteable homolog OS=Mus musculus GN=Insc PE=4 SV=1 - [G3UW77_MOUSE]                                               | 2.07  | 2 | 1  | 1  | 1   | 0.886  | 1.141  | 1.139  | 9.828  | 2.38   | 2.07  | 1  | 1   | 532  | 58.6  | 5.16 |
| Q5PPR4   | Zfp354a protein OS=Mus musculus GN=Zfp354a PE=2 SV=1 - [Q5PPR4_MOUSE]                                                        | 1.75  | 3 | 1  | 1  | 1   | 1.581  | 2.220  | 2.103  | 10.242 | 1.79   | 1.75  | 1  | 1   | 571  | 65.4  | 9.38 |
| P12710   | Fatty acid-binding protein, liver OS=Mus musculus GN=Fabp1 PE=1 SV=2 - [FABPL_MOUSE]                                         | 55.91 | 1 | 6  | 6  | 26  | 3.311  | 0.384  | 8.583  | 12.127 | 81.76  | 55.91 | 10 | 26  | 127  | 14.2  | 8.56 |
| Q8R366   | Immunoglobulin superfamily member 8<br>OS=Mus musculus<br>GN=Igsf8 PE=1 SV=2 -<br>[IGSF8_MOUSE]                              | 35.68 | 2 | 2  | 17 | 151 | 2.511  | 7.806  | 6.780  | 13.203 | 487.78 | 35.68 | 33 | 151 | 611  | 65.0  | 7.99 |
| P05367   | Serum amyloid A-2 protein<br>OS=Mus musculus<br>GN=Saa2 PE=1 SV=1 -<br>[SAA2_MOUSE]                                          | 28.69 | 1 | 3  | 4  | 12  | 1.900  | 1.858  | 10.905 | 24.241 | 36.09  | 28.69 | 7  | 12  | 122  | 13.6  | 6.93 |
| P05366   | Serum amyloid A-1 protein<br>OS=Mus musculus<br>GN=Saa1 PE=2 SV=2 -<br>[SAA1_MOUSE]                                          | 27.05 | 1 | 2  | 3  | 15  | 1.542  | 0.872  | 12.726 | 29.258 | 44.59  | 27.05 | 5  | 15  | 122  | 13.8  | 7.03 |

|        |                                                                                            |      |   |   |   |   |       |       |       |        |      |      |   |   |     |      |      |
|--------|--------------------------------------------------------------------------------------------|------|---|---|---|---|-------|-------|-------|--------|------|------|---|---|-----|------|------|
| F6RU76 | Protein 4933403008Rik<br>OS=Mus musculus<br>GN=4933403008Rik PE=4<br>SV=2 - [F6RU76_MOUSE] | 5.68 | 2 | 1 | 1 | 1 | 1.717 | 2.046 | 3.050 | 39.352 | 3.10 | 5.68 | 1 | 1 | 264 | 29.7 | 6.23 |
|--------|--------------------------------------------------------------------------------------------|------|---|---|---|---|-------|-------|-------|--------|------|------|---|---|-----|------|------|
