# Supplementary material for: Hypothalamus proteomics from mouse models with obesity and anorexia reveals therapeutic targets of appetite regulation
Source: PubMed Central journal article supplement (PMC4855256; doi:10.1038/nutd.2016.10), 2016-04-25
Supplement: nutd201610x7.pdf [file nutd201610x7.pdf]

**Supplementary Table 4.** Differentially expressed proteins in the HFD groups compared to controls (proteins analysed with at least two unique peptides)

| Accession | Description                                                                                                            | ΣCoverage | Σ# Proteins | Σ# Unique Pepti | Σ# Peptides | Σ# PSMs | HFD1/C1 | HFD2/C1 | LPS1/C2 | LPS2/C2 |
|-----------|------------------------------------------------------------------------------------------------------------------------|-----------|-------------|-----------------|-------------|---------|---------|---------|---------|---------|
| P08032    | Spectrin alpha chain, erythrocytic 1 OS=Mus musculus GN=Spta1 PE=2 SV=3 - [SPTA1_MOUSE]                                | 43.35     | 3           | 82              | 84          | 302     | 1.47    | 0.84    | -0.52   | 0.21    |
| P07724    | Serum albumin OS=Mus musculus GN=Alb PE=1 SV=3 - [ALBU_MOUSE]                                                          | 75.49     | 4           | 49              | 49          | 2294    | 1.97    | 0.72    | -1.29   | -0.51   |
| Q9Z1Q9    | Valine-tRNA ligase OS=Mus musculus GN=Vars PE=2 SV=1 - [SYVC_MOUSE]                                                    | 40.22     | 6           | 42              | 42          | 196     | -0.69   | -0.83   | -0.46   | -0.24   |
| D3YW52    | Alpha-2-macroglobulin OS=Mus musculus GN=Pzp PE=2 SV=1 - [D3YW52_MOUSE]                                                | 36.70     | 3           | 42              | 45          | 220     | 1.60    | 1.62    | -0.32   | 0.69    |
| Q91UZ1    | Phospholipase C beta 4 OS=Mus musculus GN=Plcb4 PE=2 SV=1 - [Q91UZ1_MOUSE]                                             | 37.45     | 2           | 32              | 43          | 132     | -0.78   | -1.49   | -0.75   | -0.33   |
| Q8VHX6-2  | Isoform 2 of Filamin-C OS=Mus musculus GN=Flnc - [FLNC_MOUSE]                                                          | 17.23     | 4           | 27              | 35          | 90      | 0.86    | 1.03    | -0.32   | 0.13    |
| Q6PHS9-4  | Isoform 4 of Voltage-dependent calcium channel subunit alpha-2/delta-2 OS=Mus musculus GN=Cacna2d2 - [CA2D2_MOUSE]     | 26.42     | 7           | 26              | 27          | 134     | -0.69   | -1.11   | -0.34   | 0.14    |
| P28665    | Murinoglobulin-1 OS=Mus musculus GN=Mug1 PE=1 SV=3 - [MUG1_MOUSE]                                                      | 35.70     | 1           | 24              | 40          | 155     | 1.84    | 1.91    | 0.07    | 0.71    |
| P06728    | Apolipoprotein A-IV OS=Mus musculus GN=Apoa4 PE=2 SV=3 - [APOA4_MOUSE]                                                 | 71.14     | 1           | 24              | 24          | 119     | 1.64    | 1.89    | -0.96   | -0.01   |
| Q91X72    | Hemopexin OS=Mus musculus GN=Hpx PE=1 SV=2 - [HEMO_MOUSE]                                                              | 50.22     | 1           | 23              | 23          | 133     | 1.78    | 1.06    | 0.35    | 1.05    |
| Q3UX37    | Protein Plekhg1 OS=Mus musculus GN=Plekhg1 PE=2 SV=1 - [Q3UX37_MOUSE]                                                  | 18.27     | 4           | 22              | 23          | 52      | -0.79   | -1.44   | -0.68   | -0.61   |
| Q99K47    | Fibrinogen, alpha polypeptide OS=Mus musculus GN=Fga PE=2 SV=1 - [Q99K47_MOUSE]                                        | 49.55     | 2           | 22              | 23          | 134     | 0.92    | 0.76    | 0.56    | 1.56    |
| Q8K0E8    | Fibrinogen beta chain OS=Mus musculus GN=Fgb PE=2 SV=1 - [FIBB_MOUSE]                                                  | 51.98     | 2           | 22              | 23          | 146     | 0.89    | 0.70    | 0.36    | 1.38    |
| P28867    | Protein kinase C delta type OS=Mus musculus GN=Prkcd PE=1 SV=3 - [KPCD_MOUSE]                                          | 39.17     | 6           | 21              | 24          | 93      | -0.65   | -1.60   | -0.73   | -0.63   |
| Q8CA95-3  | Isoform 3 of cAMP and cAMP-inhibited cGMP 3',5'-cyclic phosphodiesterase 10A OS=Mus musculus GN=Pde10a - [PDE10_MOUSE] | 30.53     | 7           | 21              | 21          | 81      | -1.27   | -1.21   | 1.42    | 0.26    |

|          |                                                                                                 |       |    |    |    |     |       |       |       |       |
|----------|-------------------------------------------------------------------------------------------------|-------|----|----|----|-----|-------|-------|-------|-------|
| Q9D8E6   | 60S ribosomal protein L4 OS=Mus musculus GN=Rpl4 PE=1 SV=3 - [RL4_MOUSE]                        | 44.63 | 1  | 21 | 21 | 121 | -1.03 | -0.81 | -0.53 | -0.27 |
| Q61282   | Aggrecan core protein OS=Mus musculus GN=Acan PE=1 SV=2 - [PGCA_MOUSE]                          | 13.56 | 1  | 21 | 22 | 73  | 1.89  | 0.67  | 1.12  | 0.72  |
| Q8CH09   | SURP and G-patch domain-containing protein 2 OS=Mus musculus GN=Supg2 PE=2 SV=2 - [SUGP2_MOUSE] | 22.21 | 4  | 20 | 20 | 87  | -0.90 | -0.67 | -0.31 | -0.23 |
| P25444   | 40S ribosomal protein S2 OS=Mus musculus GN=Rps2 PE=1 SV=3 - [RS2_MOUSE]                        | 62.46 | 11 | 20 | 20 | 91  | -0.86 | -0.59 | -0.46 | -0.33 |
| P55096   | ATP-binding cassette sub-family D member 3 OS=Mus musculus GN=Abcd3 PE=1 SV=2 - [ABCD3_MOUSE]   | 36.42 | 1  | 19 | 20 | 66  | -1.06 | -0.68 | -0.54 | -0.21 |
| Q99JF8   | PC4 and SFRS1-interacting protein OS=Mus musculus GN=Psip1 PE=1 SV=1 - [PSIP1_MOUSE]            | 39.02 | 4  | 18 | 20 | 90  | -0.70 | -0.71 | 0.01  | -0.44 |
| Q9CZW4   | Long-chain-fatty-acid-CoA ligase 3 OS=Mus musculus GN=Acsl3 PE=2 SV=2 - [ACSL3_MOUSE]           | 35.14 | 3  | 18 | 20 | 54  | -0.79 | -0.58 | -0.25 | 0.14  |
| P21614   | Vitamin D-binding protein OS=Mus musculus GN=Gc PE=1 SV=2 - [VTDB_MOUSE]                        | 49.79 | 1  | 18 | 19 | 63  | 1.57  | 0.99  | -0.48 | 0.09  |
| Q9QUG9   | RAS guanyl-releasing protein 2 OS=Mus musculus GN=Rasgrp2 PE=1 SV=2 - [GRP2_MOUSE]              | 29.61 | 11 | 17 | 17 | 61  | -1.13 | -0.94 | 0.15  | -0.28 |
| Q00623   | Apolipoprotein A-I OS=Mus musculus GN=Apoa1 PE=1 SV=2 - [APOA1_MOUSE]                           | 49.62 | 1  | 17 | 17 | 157 | 1.65  | 1.93  | -0.70 | 0.23  |
| P12658   | Calbindin OS=Mus musculus GN=Calb1 PE=1 SV=2 - [CALB1_MOUSE]                                    | 79.69 | 1  | 17 | 18 | 347 | 0.90  | 1.06  | 0.40  | -0.12 |
| P20918   | Plasminogen OS=Mus musculus GN=Plg PE=1 SV=3 - [PLMN_MOUSE]                                     | 26.60 | 2  | 17 | 18 | 70  | 1.82  | 0.81  | -1.04 | -0.21 |
| Q8VCM7   | Fibrinogen gamma chain OS=Mus musculus GN=Fgg PE=2 SV=1 - [FIBG_MOUSE]                          | 48.39 | 1  | 17 | 17 | 78  | 1.13  | 0.66  | 0.47  | 1.60  |
| P06880   | Somatotropin OS=Mus musculus GN=Gh1 PE=2 SV=1 - [SOMA_MOUSE]                                    | 65.74 | 1  | 16 | 17 | 303 | -0.93 | -1.18 | -1.87 | -1.83 |
| Q99KK2   | N-acetylneuraminate cytidyltransferase OS=Mus musculus GN=Cimas PE=1 SV=2 - [NEUA_MOUSE]        | 44.91 | 2  | 16 | 17 | 72  | -0.94 | -0.81 | -0.56 | -0.19 |
| Q9WTS6-2 | Isoform 2 of Teneurin-3 OS=Mus musculus GN=Tenn3 - [TEN3_MOUSE]                                 | 10.60 | 5  | 16 | 21 | 59  | -0.60 | -0.61 | -0.31 | -0.21 |

|        |                                                                                                           |       |   |    |    |     |       |       |       |       |
|--------|-----------------------------------------------------------------------------------------------------------|-------|---|----|----|-----|-------|-------|-------|-------|
| O08677 | Kininogen-1 OS=Mus musculus GN=Kng1 PE=1 SV=1 - [KNG1_MOUSE]                                              | 26.78 | 4 | 16 | 17 | 82  | 1.63  | 0.79  | -0.46 | -0.01 |
| P01029 | Complement C4-B OS=Mus musculus GN=C4b PE=1 SV=3 - [CO4B_MOUSE]                                           | 10.70 | 2 | 16 | 16 | 34  | 1.60  | 0.64  | -0.51 | 0.08  |
| P24529 | Tyrosine 3-monooxygenase OS=Mus musculus GN=Th PE=1 SV=3 - [TY3H_MOUSE]                                   | 39.96 | 5 | 15 | 15 | 55  | -1.06 | -1.38 | 1.26  | 0.89  |
| P63158 | High mobility group protein B1 OS=Mus musculus GN=Hmgb1 PE=1 SV=2 - [HMGB1_MOUSE]                         | 43.72 | 3 | 15 | 16 | 101 | -1.02 | -1.02 | -0.02 | -0.57 |
| Q80XN0 | D-beta-hydroxybutyrate dehydrogenase, mitochondrial OS=Mus musculus GN=Bdh1 PE=1 SV=2 - [BDH_MOUSE]       | 55.10 | 2 | 15 | 17 | 189 | -0.73 | -0.91 | -0.65 | -0.68 |
| O70503 | Estradiol 17-beta-dehydrogenase 12 OS=Mus musculus GN=Hsd17b12 PE=2 SV=1 - [DHB12_MOUSE]                  | 44.55 | 2 | 15 | 15 | 58  | -0.87 | -0.73 | -0.37 | 0.03  |
| P19221 | Prothrombin OS=Mus musculus GN=F2 PE=1 SV=1 - [THR_B_MOUSE]                                               | 27.67 | 3 | 15 | 16 | 52  | 2.02  | 1.25  | -1.01 | -0.12 |
| A2A5R8 | Double-stranded RNA-binding protein Staufen homolog 1 OS=Mus musculus GN=Stau1 PE=2 SV=1 - [A2A5R8_MOUSE] | 34.43 | 4 | 14 | 15 | 31  | -0.64 | -1.41 | -0.17 | -0.48 |
| D3Z6C3 | 40S ribosomal protein S3a OS=Mus musculus GN=Rps3a2 PE=3 SV=1 - [D3Z6C3_MOUSE]                            | 51.89 | 3 | 14 | 14 | 63  | -1.01 | -0.66 | -0.51 | -0.39 |
| P32261 | Antithrombin-III OS=Mus musculus GN=Serpinc1 PE=1 SV=1 - [ANT3_MOUSE]                                     | 35.05 | 1 | 14 | 14 | 49  | 1.48  | 1.22  | -0.88 | -0.03 |
| Q9JHU2 | Palmdelphin OS=Mus musculus GN=Palmd PE=1 SV=1 - [PALMD_MOUSE]                                            | 30.49 | 3 | 14 | 14 | 43  | 0.86  | 0.95  | 0.52  | -0.13 |
| O08842 | GDNF family receptor alpha-2 OS=Mus musculus GN=Gfra2 PE=2 SV=1 - [GFRA2_MOUSE]                           | 31.10 | 3 | 13 | 14 | 44  | -0.79 | -1.14 | -0.67 | -0.18 |
| P62702 | 40S ribosomal protein S4, X isoform OS=Mus musculus GN=Rps4x PE=2 SV=2 - [RS4X_MOUSE]                     | 55.51 | 2 | 13 | 15 | 68  | -0.95 | -0.87 | -0.48 | -0.29 |
| P62631 | Elongation factor 1-alpha 2 OS=Mus musculus GN=Eef1a2 PE=1 SV=1 - [EF1A2_MOUSE]                           | 64.79 | 1 | 13 | 25 | 320 | -0.65 | -0.84 | -0.11 | -0.02 |
| A3KG01 | Eph receptor B2 OS=Mus musculus GN=Ephb2 PE=2 SV=2 - [A3KG01_MOUSE]                                       | 19.98 | 8 | 13 | 17 | 39  | -0.87 | -0.84 | -0.48 | -0.27 |

|          |                                                                                                                     |       |    |    |    |     |       |       |       |       |
|----------|---------------------------------------------------------------------------------------------------------------------|-------|----|----|----|-----|-------|-------|-------|-------|
| Q07235   | Glia-derived nexin<br>OS=Mus musculus<br>GN=Serpine2 PE=2<br>SV=2 - [GDN_MOUSE]                                     | 37.78 | 1  | 13 | 14 | 38  | -0.80 | -0.78 | -0.42 | -0.09 |
| O35633-2 | Isoform 2 of Vesicular<br>inhibitory amino acid<br>transporter OS=Mus<br>musculus GN=Slc32a1 -<br>[VIAAT_MOUSE]     | 30.52 | 2  | 13 | 14 | 96  | -0.80 | -0.66 | -0.07 | 0.22  |
| Q8K4P8   | E3 ubiquitin-protein<br>ligase HECW1 OS=Mus<br>musculus GN=Hecw1<br>PE=2 SV=3 -<br>[HECW1_MOUSE]                    | 11.91 | 6  | 13 | 16 | 37  | -0.60 | -0.61 | 0.16  | -0.10 |
| P07310   | Creatine kinase M-type<br>OS=Mus musculus<br>GN=Ckm PE=1 SV=1 -<br>[KCRM_MOUSE]                                     | 44.88 | 1  | 13 | 16 | 123 | 2.87  | 3.59  | -0.61 | -0.13 |
| P04186   | Complement factor B<br>OS=Mus musculus<br>GN=Cfb PE=1 SV=2 -<br>[CFAB_MOUSE]                                        | 15.64 | 9  | 13 | 13 | 33  | 1.33  | 0.99  | -0.70 | 0.52  |
| P14131   | 40S ribosomal protein<br>S16 OS=Mus musculus<br>GN=Rps16 PE=2 SV=4 -<br>[RS16_MOUSE]                                | 67.12 | 1  | 12 | 12 | 65  | -0.66 | -0.94 | -0.45 | -0.28 |
| A2APX7   | Protein Scn1a OS=Mus<br>musculus GN=Scn1a<br>PE=2 SV=1 -<br>[A2APX7_MOUSE]                                          | 12.57 | 13 | 12 | 24 | 106 | -0.80 | -0.88 | 0.23  | 0.38  |
| Q64012-2 | Isoform 1 of RNA-<br>binding protein Raly<br>OS=Mus musculus<br>GN=Raly -<br>[RALY_MOUSE]                           | 45.95 | 5  | 12 | 12 | 49  | -1.26 | -0.86 | -0.35 | -0.29 |
| F6WDS8   | Regulator of G-protein-<br>signaling 6 OS=Mus<br>musculus GN=Rgs6<br>PE=4 SV=1 -<br>[F6WDS8_MOUSE]                  | 34.21 | 3  | 12 | 15 | 78  | -1.05 | -0.80 | 0.15  | 0.30  |
| G3X9Y1   | Synaptotagmin III,<br>isoform CRA_a OS=Mus<br>musculus GN=Syt3<br>PE=4 SV=1 -<br>[G3X9Y1_MOUSE]                     | 28.96 | 4  | 12 | 16 | 59  | -0.65 | -0.66 | 0.00  | 0.05  |
| D3Z6S1   | Transmembrane protein<br>214 OS=Mus musculus<br>GN=Tmem214 PE=2<br>SV=1<br>[D3Z6S1_MOUSE]                           | 22.90 | 4  | 12 | 13 | 45  | -0.81 | -0.59 | -0.46 | -0.25 |
| Q99L45   | Eukaryotic translation<br>initiation factor 2 subunit<br>2 OS=Mus musculus<br>GN=Eif2s2 PE=1 SV=1 -<br>[IF2B_MOUSE] | 32.63 | 3  | 12 | 12 | 44  | -0.68 | -0.58 | -0.32 | -0.53 |
| Q61646   | Haptoglobin OS=Mus<br>musculus GN=Hp PE=1<br>SV=1 - [HPT_MOUSE]                                                     | 34.01 | 1  | 12 | 12 | 34  | 1.22  | 1.59  | 2.86  | 3.23  |
| D3YY36   | Protein 1300017J02Rik<br>OS=Mus musculus<br>GN=1300017J02Rik<br>PE=2 SV=1 -<br>[D3YY36_MOUSE]                       | 22.67 | 3  | 12 | 13 | 40  | 2.19  | 0.86  | -0.79 | -0.04 |
| P62281   | 40S ribosomal protein<br>S11 OS=Mus musculus<br>GN=Rps11 PE=2 SV=3 -<br>[RS11_MOUSE]                                | 49.37 | 1  | 11 | 11 | 48  | -1.06 | -1.21 | -0.52 | -0.37 |

|        |                                                                                               |       |   |    |    |     |       |       |       |       |
|--------|-----------------------------------------------------------------------------------------------|-------|---|----|----|-----|-------|-------|-------|-------|
| Q6ZWN5 | 40S ribosomal protein S9 OS=Mus musculus GN=Rps9 PE=2 SV=3 - [RS9_MOUSE]                      | 41.24 | 6 | 11 | 12 | 74  | -1.34 | -1.16 | -0.61 | -0.30 |
| P41105 | 60S ribosomal protein L28 OS=Mus musculus GN=Rpl28 PE=1 SV=2 - [RL28_MOUSE]                   | 56.93 | 2 | 11 | 11 | 103 | -1.13 | -1.14 | -0.54 | -0.23 |
| G3XA00 | Glutamate receptor, metabotropic 4 OS=Mus musculus GN=Grm4 PE=3 SV=1 - [G3XA00_MOUSE]         | 16.78 | 5 | 11 | 13 | 40  | -0.75 | -0.98 | 0.25  | 0.14  |
| P62270 | 40S ribosomal protein S18 OS=Mus musculus GN=Rps18 PE=1 SV=3 - [RS18_MOUSE]                   | 49.34 | 4 | 11 | 11 | 47  | -1.16 | -0.81 | -0.62 | -0.40 |
| Q922Q8 | Leucine-rich repeat-containing protein 59 OS=Mus musculus GN=Lrrc59 PE=2 SV=1 - [LRC59_MOUSE] | 42.67 | 1 | 11 | 11 | 49  | -0.71 | -0.78 | -0.23 | -0.20 |
| P01872 | Ig mu chain C region secreted form OS=Mus musculus GN=Igh-6 PE=1 SV=2 - [IGHM_MOUSE]          | 32.38 | 2 | 11 | 12 | 35  | 1.34  | 1.67  | 0.35  | 0.85  |
| Q01339 | Beta-2-glycoprotein 1 OS=Mus musculus GN=ApoH PE=1 SV=1 - [APOH_MOUSE]                        | 35.65 | 3 | 11 | 11 | 39  | 1.79  | 1.26  | -0.67 | -0.30 |
| P07759 | Serine protease inhibitor A3K OS=Mus musculus GN=Serpina3k PE=1 SV=2 - [SPA3K_MOUSE]          | 46.89 | 1 | 11 | 16 | 126 | 1.84  | 1.15  | -0.30 | 0.81  |
| Q5XJF6 | Ribosomal protein OS=Mus musculus GN=Rpl10a PE=2 SV=1 [Q5XJF6_MOUSE]                          | 41.94 | 4 | 10 | 10 | 58  | -1.37 | -1.06 | -0.53 | -0.38 |
| Q8BLE7 | Vesicular glutamate transporter 2 OS=Mus musculus GN=Slc17a6 PE=1 SV=1 - [VGLU2_MOUSE]        | 16.84 | 1 | 10 | 10 | 85  | -0.71 | -1.05 | -0.43 | 0.15  |
| Q8C4C4 | Repulsive guidance molecule A OS=Mus musculus GN=Rgma PE=2 SV=1 - [Q8C4C4_MOUSE]              | 35.17 | 3 | 10 | 10 | 19  | -0.67 | -0.90 | -0.76 | -0.51 |
| P62830 | 60S ribosomal protein L23 OS=Mus musculus GN=Rpl23 PE=1 SV=1 - [RL23_MOUSE]                   | 71.43 | 2 | 10 | 10 | 36  | -1.08 | -0.79 | -0.63 | -0.50 |
| I7HLV2 | 60S ribosomal protein L10 (Fragment) OS=Mus musculus GN=Rpl10 PE=4 SV=1 - [I7HLV2_MOUSE]      | 50.75 | 4 | 10 | 10 | 69  | -1.16 | -0.77 | -0.56 | -0.37 |
| Q8K2Q7 | BRO1 domain-containing protein BROX OS=Mus musculus GN=Brox PE=2 SV=1 - [BROX_MOUSE]          | 33.82 | 3 | 10 | 11 | 26  | -0.80 | -0.71 | -0.47 | -0.06 |
| Q3UUQ7 | GPI inositol-deacylase OS=Mus musculus GN=Pgap1 PE=1 SV=3 - [PGAP1_MOUSE]                     | 9.22  | 1 | 10 | 10 | 29  | -0.96 | -0.69 | -0.72 | -0.23 |

|        |                                                                                                           |       |    |    |    |      |       |       |       |       |
|--------|-----------------------------------------------------------------------------------------------------------|-------|----|----|----|------|-------|-------|-------|-------|
| P19253 | 60S ribosomal protein L13a OS=Mus musculus GN=Rpl13a PE=1 SV=4 - [RL13A_MOUSE]                            | 37.44 | 3  | 10 | 10 | 58   | -0.88 | -0.62 | -0.45 | -0.36 |
| Q9CXW4 | 60S ribosomal protein L11 OS=Mus musculus GN=Rpl11 PE=1 SV=4 - [RL11_MOUSE]                               | 47.75 | 6  | 10 | 10 | 33   | -0.68 | -0.58 | -0.40 | -0.23 |
| P16015 | Carbonic anhydrase 3 OS=Mus musculus GN=Ca3 PE=1 SV=3 - [CAH3_MOUSE]                                      | 48.08 | 1  | 10 | 10 | 35   | 1.44  | 1.49  | 1.20  | 2.08  |
| Q923D2 | Flavin reductase (NADPH) OS=Mus musculus GN=Blvrb PE=2 SV=3 - [BLVRB_MOUSE]                               | 77.67 | 3  | 10 | 10 | 84   | 1.31  | 0.77  | -0.34 | 0.37  |
| Q1RLL3 | Copine-9 OS=Mus musculus GN=Cpne9 PE=2 SV=1 - [CPNE9_MOUSE]                                               | 37.43 | 1  | 9  | 15 | 100  | -1.48 | -2.22 | -0.84 | -0.22 |
| Q8R4E6 | Purine-rich element-binding protein gamma OS=Mus musculus GN=Purg PE=1 SV=1 - [PURG_MOUSE]                | 27.71 | 2  | 9  | 13 | 33   | -1.18 | -1.55 | -0.77 | -1.04 |
| Q50H33 | BTB/POZ domain-containing protein KCTD8 OS=Mus musculus GN=Kctd8 PE=1 SV=1 - [KCTD8_MOUSE]                | 23.53 | 2  | 9  | 11 | 35   | -1.29 | -1.32 | -0.22 | 0.21  |
| P27600 | Guanine nucleotide-binding protein subunit alpha-12 OS=Mus musculus GN=Gna12 PE=1 SV=3 - [GNA12_MOUSE]    | 26.12 | 3  | 9  | 11 | 99   | -0.75 | -1.19 | -0.36 | 0.17  |
| Q04736 | Tyrosine-protein kinase Yes OS=Mus musculus GN=Yes1 PE=1 SV=3 - [YES_MOUSE]                               | 36.78 | 15 | 9  | 19 | 96   | -0.60 | -0.68 | -0.27 | 0.14  |
| Q9D1E8 | 1-acyl-sn-glycerol-3-phosphate acyltransferase epsilon OS=Mus musculus GN=Agpat5 PE=2 SV=2 - [PLCE_MOUSE] | 23.56 | 2  | 9  | 9  | 30   | -0.80 | -0.62 | -0.42 | 0.09  |
| P62245 | 40S ribosomal protein S15a OS=Mus musculus GN=Rps15a PE=2 SV=2 - [RS15A_MOUSE]                            | 66.92 | 4  | 9  | 9  | 50   | -0.82 | -0.59 | -0.49 | -0.24 |
| P13634 | Carbonic anhydrase 1 OS=Mus musculus GN=Ca1 PE=2 SV=4 - [CAH1_MOUSE]                                      | 54.02 | 2  | 9  | 9  | 29   | 1.06  | 1.88  | 0.35  | 1.41  |
| Q91VB8 | Alpha globin 1 OS=Mus musculus GN=Hba-a1 PE=2 SV=1 - [Q91VB8_MOUSE]                                       | 69.72 | 2  | 9  | 10 | 1680 | 1.82  | 1.47  | -0.89 | 0.38  |
| P14602 | Heat shock protein beta-1 OS=Mus musculus GN=Hspb1 PE=1 SV=3 - [HSPB1_MOUSE]                              | 61.72 | 4  | 9  | 9  | 35   | 1.00  | 1.03  | 0.19  | 0.51  |
| P52760 | Ribonuclease UK114 OS=Mus musculus GN=Hrsp12 PE=1 SV=3 - [UK114_MOUSE]                                    | 92.59 | 1  | 9  | 11 | 87   | 1.19  | 0.70  | 1.10  | 0.78  |

|        |                                                                                                         |       |   |   |    |    |       |       |       |       |
|--------|---------------------------------------------------------------------------------------------------------|-------|---|---|----|----|-------|-------|-------|-------|
| O89020 | Afamin OS=Mus musculus GN=Afm PE=1 SV=2 - [AFAM_MOUSE]                                                  | 16.78 | 3 | 9 | 9  | 18 | 1.65  | 0.63  | -1.78 | -0.45 |
| Q9D2P8 | Myelin-associated oligodendrocyte basic protein OS=Mus musculus GN=Mobp PE=2 SV=1 - [MOBP_MOUSE]        | 42.94 | 5 | 8 | 8  | 62 | -0.75 | -1.32 | 1.12  | 1.34  |
| Q8C0M2 | Abhydrolase domain-containing protein 4 OS=Mus musculus GN=Abhd4 PE=2 SV=1 - [Q8C0M2_MOUSE]             | 22.96 | 3 | 8 | 8  | 29 | -0.64 | -0.80 | -0.43 | -0.02 |
| E9QAZ2 | Ribosomal protein L15 OS=Mus musculus GN=Gm10020 PE=3 SV=1 - [E9QAZ2_MOUSE]                             | 39.71 | 4 | 8 | 8  | 58 | -1.19 | -0.76 | -0.44 | -0.22 |
| P62717 | 60S ribosomal protein L18a OS=Mus musculus GN=Rpl18a PE=1 SV=1 - [RL18A_MOUSE]                          | 39.20 | 2 | 8 | 8  | 43 | -1.25 | -0.72 | -0.63 | -0.30 |
| A2A547 | 60S ribosomal protein L19 OS=Mus musculus GN=Rpl19 PE=2 SV=1 - [A2A547_MOUSE]                           | 36.60 | 2 | 8 | 10 | 82 | -0.62 | -0.63 | -0.37 | -0.15 |
| Q9JHJ0 | Tropomodulin-3 OS=Mus musculus GN=Tmod3 PE=1 SV=1 - [TMOD3_MOUSE]                                       | 28.41 | 1 | 8 | 9  | 27 | 0.96  | 0.88  | 0.10  | -0.17 |
| G5E920 | MCG114640 OS=Mus musculus GN=Gm6104 PE=4 SV=1 - [G5E920_MOUSE]                                          | 29.50 | 3 | 7 | 7  | 18 | -0.81 | -1.26 | -0.17 | -0.57 |
| P43276 | Histone H1.5 OS=Mus musculus GN=Hist1h1b PE=1 SV=2 - [H15_MOUSE]                                        | 38.57 | 1 | 7 | 13 | 68 | -0.91 | -0.92 | -0.61 | -0.82 |
| Q9CXL6 | Doublecortin, isoform CRA_a OS=Mus musculus GN=Dcx PE=2 SV=1 - [Q9CXL6_MOUSE]                           | 30.56 | 3 | 7 | 11 | 44 | -0.75 | -0.88 | -0.71 | -1.32 |
| Q7M759 | Alpha/beta hydrolase domain-containing protein 17B OS=Mus musculus GN=Abhd17b PE=2 SV=1 - [AB17B_MOUSE] | 39.58 | 1 | 7 | 8  | 19 | -0.67 | -0.81 | 0.19  | 0.15  |
| O70152 | Dolichol-phosphate mannosyltransferase OS=Mus musculus GN=Dpm1 PE=2 SV=1 - [DPM1_MOUSE]                 | 25.77 | 3 | 7 | 7  | 26 | -0.68 | -0.80 | -0.43 | 0.01  |
| O55142 | 60S ribosomal protein L35a OS=Mus musculus GN=Rpl35a PE=2 SV=2 - [RL35A_MOUSE]                          | 49.09 | 1 | 7 | 7  | 17 | -1.18 | -0.65 | -0.39 | -0.33 |
| P35550 | rRNA 2'-O-methyltransferase fibrillar OS=Mus musculus GN=Fbl PE=1 SV=2 - [FBRL_MOUSE]                   | 33.64 | 1 | 7 | 9  | 55 | -0.60 | -0.64 | -0.36 | -0.01 |

|        |                                                                                                      |       |   |   |    |     |       |       |       |       |
|--------|------------------------------------------------------------------------------------------------------|-------|---|---|----|-----|-------|-------|-------|-------|
| Q9D1R9 | 60S ribosomal protein L34 OS=Mus musculus GN=Rpl34 PE=3 SV=2 - [RL34_MOUSE]                          | 38.46 | 2 | 7 | 7  | 34  | -1.07 | -0.61 | -0.45 | -0.33 |
| Q99K13 | ER membrane protein complex subunit 3 OS=Mus musculus GN=Emc3 PE=2 SV=3 - [EMC3_MOUSE]               | 19.16 | 1 | 7 | 7  | 33  | -0.77 | -0.60 | -0.50 | -0.34 |
| Q9ESB3 | Histidine-rich glycoprotein OS=Mus musculus GN=Hrg PE=1 SV=2 - [HRG_MOUSE]                           | 14.29 | 1 | 7 | 7  | 25  | 1.81  | 1.50  | -0.98 | -0.13 |
| Q91XL1 | Leucine-rich HEV glycoprotein (Precursor) OS=Mus musculus GN=Lrg1 PE=2 SV=1 - [Q91XL1_MOUSE]         | 23.68 | 1 | 7 | 8  | 30  | 2.00  | 1.44  | 1.27  | 2.23  |
| O70250 | Phosphoglycerate mutase 2 OS=Mus musculus GN=Pgam2 PE=1 SV=3 - [PGAM2_MOUSE]                         | 50.59 | 1 | 7 | 12 | 204 | 1.17  | 1.20  | -0.16 | -0.32 |
| P26262 | Plasma kallikrein OS=Mus musculus GN=Klb1 PE=1 SV=2 - [KLKB1_MOUSE]                                  | 12.07 | 1 | 7 | 7  | 18  | 1.14  | 0.88  | -0.74 | 0.27  |
| P29391 | Ferritin light chain 1 OS=Mus musculus GN=Fril1 PE=1 SV=2 - [FRIL1_MOUSE]                            | 52.46 | 4 | 7 | 7  | 39  | 0.92  | 0.87  | 0.43  | 0.45  |
| Q9CPQ0 | Prolactin OS=Mus musculus GN=Pr PE=2 SV=2 - [Q9CPQ0_MOUSE]                                           | 24.00 | 3 | 6 | 6  | 34  | -0.81 | -1.16 | -3.08 | -3.27 |
| O70174 | Neuronal acetylcholine receptor subunit alpha-4 OS=Mus musculus GN=Chra4 PE=2 SV=2 - [ACHA4_MOUSE]   | 11.92 | 2 | 6 | 6  | 20  | -0.77 | -1.09 | -0.17 | -0.08 |
| P35980 | 60S ribosomal protein L18 OS=Mus musculus GN=Rpl18 PE=2 SV=3 - [RL18_MOUSE]                          | 32.45 | 5 | 6 | 6  | 36  | -1.11 | -0.95 | -0.52 | -0.21 |
| Q9CQC9 | GTP-binding protein SAR1b OS=Mus musculus GN=Sart1b PE=1 SV=1 - [SAR1B_MOUSE]                        | 55.05 | 1 | 6 | 9  | 32  | -0.93 | -0.74 | -0.69 | -0.06 |
| Q3UVU3 | Zinc transporter 10 OS=Mus musculus GN=Slc30a10 PE=1 SV=1 - [ZNT10_MOUSE]                            | 21.06 | 2 | 6 | 6  | 19  | -1.33 | -0.63 | -0.46 | -0.20 |
| O88602 | Voltage-dependent calcium channel gamma-2 subunit OS=Mus musculus GN=Cacng2 PE=1 SV=1 - [CCG2_MOUSE] | 29.72 | 1 | 6 | 7  | 51  | -0.66 | -0.63 | 0.03  | 0.12  |
| Q9DCU6 | 39S ribosomal protein L4, mitochondrial OS=Mus musculus GN=Mrlp4 PE=2 SV=1 - [RM04_MOUSE]            | 22.11 | 1 | 6 | 6  | 13  | -0.91 | -0.60 | -0.23 | -0.08 |
| Q8K4Q8 | Collectin-12 OS=Mus musculus GN=Colec12 PE=1 SV=1 - [COL12_MOUSE]                                    | 8.89  | 1 | 6 | 7  | 9   | 1.02  | 1.42  | -0.27 | -0.17 |



|          |                                                                                                         |       |    |   |   |    |       |       |       |       |
|----------|---------------------------------------------------------------------------------------------------------|-------|----|---|---|----|-------|-------|-------|-------|
| B2RSI6   | Leucine rich repeat containing 8 family, member B OS=Mus musculus GN=Lrro8b PE=2 SV=1 - [B2RSI6_MOUSE]  | 8.84  | 2  | 6 | 6 | 16 | 2.09  | 0.91  | 0.44  | -0.30 |
| Q9WVL3-2 | Isoform 2 of Solute carrier family 12 member 7 OS=Mus musculus GN=Slc12a7 - [S12A7_MOUSE]               | 6.74  | 2  | 6 | 8 | 17 | 1.17  | 0.88  | -0.38 | -0.20 |
| O35231   | Kinesin-like protein KIFC3 OS=Mus musculus GN=Kifc3 PE=1 SV=4 - [KIFC3_MOUSE]                           | 9.34  | 4  | 6 | 7 | 10 | 1.09  | 0.68  | 0.26  | 0.86  |
| Q9JJF0   | Nucleosome assembly protein 1-like 5 OS=Mus musculus GN=Nap15 PE=2 SV=1 - [NP1L5_MOUSE]                 | 21.79 | 1  | 5 | 5 | 28 | -0.76 | -1.77 | -1.41 | -1.33 |
| Q14B80   | Potassium voltage-gated channel subfamily C member 2 OS=Mus musculus GN=Kcnc2 PE=1 SV=1 - [KCNC2_MOUSE] | 13.55 | 2  | 5 | 7 | 12 | -0.60 | -1.11 | 0.42  | 0.30  |
| E9PWD9   | DNA-directed RNA polymerase OS=Mus musculus GN=Polmt PE=2 SV=1 - [E9PWD9_MOUSE]                         | 5.65  | 4  | 5 | 5 | 9  | -1.42 | -1.04 | -1.02 | -0.21 |
| Q76LL6-3 | Isoform 3 of FH1/FH2 domain-containing protein 3 OS=Mus musculus GN=Fhod3 - [FHOD3_MOUSE]               | 4.32  | 4  | 5 | 5 | 13 | -0.72 | -1.00 | 0.00  | -0.07 |
| P60867   | 40S ribosomal protein S20 OS=Mus musculus GN=Rps20 PE=1 SV=1 - [RS20_MOUSE]                             | 41.18 | 2  | 5 | 6 | 35 | -0.74 | -0.97 | -0.45 | -0.37 |
| Q91ZD4   | Vang-like protein 2 OS=Mus musculus GN=vangl2 PE=1 SV=3 - [VANG2_MOUSE]                                 | 13.44 | 4  | 5 | 5 | 14 | -0.66 | -0.89 | -0.84 | -0.34 |
| A2A891-2 | Isoform 2 of Calmodulin-binding transcription activator 1 OS=Mus musculus GN=Camta1 - [CMTA1_MOUSE]     | 4.84  | 5  | 5 | 6 | 13 | -0.66 | -0.88 | -0.25 | 0.08  |
| Q99N94   | 39S ribosomal protein L9, mitochondrial OS=Mus musculus GN=Mrp19 PE=2 SV=2 - [RM09_MOUSE]               | 21.13 | 2  | 5 | 5 | 11 | -0.77 | -0.81 | -0.16 | -0.24 |
| P62889   | 60S ribosomal protein L30 OS=Mus musculus GN=Rpl30 PE=2 SV=2 - [RL30_MOUSE]                             | 36.52 | 1  | 5 | 5 | 20 | -0.64 | -0.75 | -0.57 | -0.37 |
| P47963   | 60S ribosomal protein L13 OS=Mus musculus GN=Rpl13 PE=2 SV=3 - [RL13_MOUSE]                             | 19.43 | 2  | 5 | 5 | 25 | -0.63 | -0.75 | -0.38 | -0.12 |
| B0R0D5   | FERM domain-containing protein 5 (Fragment) OS=Mus musculus GN=Frdm5 PE=2 SV=1 - [B0R0D5_MOUSE]         | 15.40 | 10 | 5 | 5 | 11 | -0.71 | -0.74 | 0.21  | 0.53  |

|          |                                                                                                 |       |   |   |   |    |       |       |       |       |
|----------|-------------------------------------------------------------------------------------------------|-------|---|---|---|----|-------|-------|-------|-------|
| Q3TBW2   | 39S ribosomal protein L10, mitochondrial OS=Mus musculus GN=Mrp10 PE=2 SV=2 - [RM10_MOUSE]      | 29.01 | 2 | 5 | 5 | 13 | -0.64 | -0.70 | -0.04 | -0.16 |
| E9Q9D6   | R3H domain-containing protein 2 OS=Mus musculus GN=R3hdm2 PE=2 SV=1 - [E9Q9D6_MOUSE]            | 9.30  | 7 | 5 | 7 | 16 | -0.62 | -0.69 | -0.27 | -0.87 |
| P63276   | 40S ribosomal protein S17 OS=Mus musculus GN=Rps17 PE=1 SV=2 - [RS17_MOUSE]                     | 47.41 | 1 | 5 | 5 | 29 | -1.49 | -0.66 | -0.58 | -0.54 |
| Q0PD20   | Rab34 OS=Mus musculus GN=Rab34 PE=2 SV=1 - [Q0PD20_MOUSE]                                       | 22.01 | 5 | 5 | 6 | 17 | -0.61 | -0.63 | -0.41 | 0.11  |
| P01868   | Ig gamma-1 chain C region secreted form OS=Mus musculus GN=Ighg1 PE=1 SV=1 - [IGHG1_MOUSE]      | 22.53 | 2 | 5 | 5 | 22 | 1.43  | 2.36  | -0.16 | 0.79  |
| P03987-2 | Isoform 2 of Ig gamma-3 chain C region OS=Mus musculus - [IGHG3_MOUSE]                          | 17.02 | 2 | 5 | 5 | 20 | 1.03  | 2.33  | 0.30  | 1.04  |
| P01837   | Ig kappa chain C region OS=Mus musculus PE=1 SV=1 - [IGKC_MOUSE]                                | 49.06 | 1 | 5 | 5 | 25 | 1.34  | 2.30  | -0.03 | 0.45  |
| H7BX79   | Coiled-coil domain-containing protein 162 OS=Mus musculus GN=Ccdc162 PE=2 SV=2 - [H7BX79_MOUSE] | 7.76  | 7 | 5 | 5 | 9  | 2.99  | 1.65  | 1.06  | 0.11  |
| P01867-2 | Isoform 2 of Ig gamma-2B chain C region OS=Mus musculus GN=Igh-3 - [IGG2B_MOUSE]                | 25.97 | 2 | 5 | 5 | 9  | 0.87  | 1.61  | -0.24 | -0.52 |
| E9Q1N0   | Protein 4932431P20Rik OS=Mus musculus GN=4932431P20Rik PE=2 SV=1 - [E9Q1N0_MOUSE]               | 3.55  | 1 | 5 | 6 | 8  | 1.80  | 1.60  | -0.08 | -0.52 |
| F8VQG7   | Protein N4bp2 OS=Mus musculus GN=N4bp2 PE=4 SV=1 - [F8VQG7_MOUSE]                               | 5.07  | 2 | 5 | 6 | 20 | 1.02  | 1.37  | 0.85  | 1.15  |
| Q9CQX2   | Cytochrome b5 type B OS=Mus musculus GN=Cyb5b PE=1 SV=1 - [CYB5B_MOUSE]                         | 32.19 | 1 | 5 | 5 | 27 | 0.91  | 1.07  | 0.87  | 0.45  |
| Q62507   | Cochlin OS=Mus musculus GN=Coch PE=2 SV=2 - [COCH_MOUSE]                                        | 9.42  | 1 | 5 | 5 | 9  | 1.01  | 1.05  | -0.15 | 0.08  |
| G3X8P9   | Aldehyde oxidase OS=Mus musculus GN=Aox1 PE=4 SV=1 - [G3X8P9_MOUSE]                             | 3.90  | 2 | 5 | 6 | 10 | 1.10  | 0.94  | 0.11  | 0.50  |
| D3Z4H6   | Nucleolysin TIA-1 OS=Mus musculus GN=Tia1 PE=2 SV=1 - [D3Z4H6_MOUSE]                            | 24.94 | 6 | 5 | 9 | 31 | 1.12  | 0.67  | 0.06  | 0.23  |

|          |                                                                                                             |       |   |   |    |     |       |       |       |       |
|----------|-------------------------------------------------------------------------------------------------------------|-------|---|---|----|-----|-------|-------|-------|-------|
| Q69ZL1   | FYVE, RhoGEF and PH domain-containing protein 6 OS=Mus musculus GN=Fgd6 PE=1 SV=2 - [FGD6_MOUSE]            | 3.50  | 2 | 5 | 5  | 5   | 2.50  | 0.65  | 0.77  | -0.46 |
| P13864-2 | Isoform 2 of DNA (cytosine-5)-methyltransferase 1 OS=Mus musculus GN=Dnmt1 - [DNMT1_MOUSE]                  | 4.73  | 3 | 5 | 5  | 7   | 1.30  | 0.65  | 0.10  | -0.18 |
| Q00897   | Alpha-1-antitrypsin 1-4 OS=Mus musculus GN=Serpina1d PE=2 SV=1 - [A1AT4_MOUSE]                              | 49.64 | 1 | 5 | 18 | 128 | 1.41  | 0.63  | 0.03  | -0.11 |
| D3YTQ9   | 40S ribosomal protein S15 OS=Mus musculus GN=Rps15 PE=2 SV=1 - [D3YTQ9_MOUSE]                               | 33.05 | 3 | 4 | 4  | 9   | -0.62 | -1.83 | -0.27 | -0.84 |
| Q99NG0   | Helicase ARIP4 OS=Mus musculus GN=Rad54l2 PE=1 SV=1 - [ARIP4_MOUSE]                                         | 4.09  | 2 | 4 | 5  | 11  | -1.25 | -1.52 | -0.65 | 0.08  |
| Q6XUX1-3 | Isoform 3 of Dual serine/threonine and tyrosine protein kinase OS=Mus musculus GN=Dstyk - [DUSTY_MOUSE]     | 4.47  | 4 | 4 | 4  | 7   | -1.38 | -1.15 | -0.25 | -0.17 |
| Q9CPW7   | Zinc finger matrix-type protein 2 OS=Mus musculus GN=Zmat2 PE=2 SV=1 - [ZMAT2_MOUSE]                        | 15.58 | 1 | 4 | 4  | 5   | -0.66 | -1.02 | 0.24  | -0.53 |
| Q9WTK3   | Glycosylphosphatidylinositol anchor attachment 1 protein OS=Mus musculus GN=Gpaa1 PE=1 SV=3 - [GPAA1_MOUSE] | 9.18  | 4 | 4 | 4  | 9   | -1.99 | -0.95 | -0.35 | -0.15 |
| Q5U5I3   | 28S ribosomal protein S18a, mitochondrial OS=Mus musculus GN=Mrps18a PE=2 SV=1 - [Q5U5I3_MOUSE]             | 21.94 | 3 | 4 | 4  | 5   | -1.18 | -0.90 | -0.37 | -0.58 |
| O09167   | 60S ribosomal protein L21 OS=Mus musculus GN=Rpl21 PE=2 SV=3 - [RL21_MOUSE]                                 | 45.63 | 3 | 4 | 9  | 19  | -1.08 | -0.85 | -0.40 | -0.31 |
| Q8K4R4   | Cytoplasmic phosphatidylinositol transfer protein 1 OS=Mus musculus GN=Pitpnc1 PE=1 SV=1 - [PITC1_MOUSE]    | 41.57 | 3 | 4 | 13 | 39  | -1.08 | -0.81 | -0.55 | -0.37 |
| P58059   | 28S ribosomal protein S21, mitochondrial OS=Mus musculus GN=Mrps21 PE=2 SV=1 - [RT21_MOUSE]                 | 48.28 | 3 | 4 | 4  | 8   | -0.76 | -0.77 | -0.16 | -0.04 |
| Q9EP72   | ER membrane protein complex subunit 7 OS=Mus musculus GN=Emc7 PE=2 SV=1 - [EMC7_MOUSE]                      | 24.48 | 1 | 4 | 4  | 12  | -0.74 | -0.73 | -0.31 | -0.17 |

|        |                                                                                                                         |       |   |   |    |     |       |       |       |       |
|--------|-------------------------------------------------------------------------------------------------------------------------|-------|---|---|----|-----|-------|-------|-------|-------|
| Q8BVA5 | UPF0554 protein<br>C2orf43 homolog<br>OS=Mus musculus<br>PE=2 SV=1 -<br>[CB043_MOUSE]                                   | 14.42 | 5 | 4 | 5  | 20  | -0.65 | -0.72 | -0.11 | -0.22 |
| D3YVE8 | Solute carrier family 35<br>member G2 OS=Mus<br>musculus GN=Slc35g2<br>PE=3 SV=1 -<br>[S35G2_MOUSE]                     | 9.71  | 1 | 4 | 4  | 17  | -0.60 | -0.71 | -0.58 | 0.10  |
| Q9JI44 | DNA methyltransferase<br>1-associated protein 1<br>OS=Mus musculus<br>GN=Dmap1 PE=1 SV=1<br>-[DMAP1_MOUSE]              | 11.97 | 2 | 4 | 4  | 6   | -1.20 | -0.59 | -0.34 | -0.43 |
| P04247 | Myoglobin OS=Mus<br>musculus GN=Mb PE=1<br>SV=3 - [MYG_MOUSE]                                                           | 36.36 | 1 | 4 | 4  | 19  | 2.59  | 3.54  | -0.90 | 0.25  |
| Q00898 | Alpha-1-antitrypsin 1-5<br>OS=Mus musculus<br>GN=Serpina1e PE=1<br>SV=1 -<br>[A1AT5_MOUSE]                              | 35.35 | 2 | 4 | 13 | 133 | 3.34  | 2.46  | 1.73  | 0.10  |
| Q00896 | Alpha-1-antitrypsin 1-3<br>OS=Mus musculus<br>GN=Serpina1c PE=1<br>SV=2 -<br>[A1AT3_MOUSE]                              | 52.91 | 2 | 4 | 17 | 175 | 1.96  | 2.12  | -0.50 | 0.94  |
| P09803 | Cadherin-1 OS=Mus<br>musculus GN=Cdh1<br>PE=1 SV=1 -<br>[CADH1_MOUSE]                                                   | 9.73  | 1 | 4 | 4  | 15  | 2.65  | 1.74  | -0.36 | -0.62 |
| P31725 | Protein S100-A9<br>OS=Mus musculus<br>GN=S100a9 PE=1 SV=3<br>-[S10A9_MOUSE]                                             | 38.94 | 1 | 4 | 4  | 12  | 1.48  | 1.28  | 0.53  | 0.98  |
| Q07456 | Protein AMBP OS=Mus<br>musculus GN=Ambp<br>PE=1 SV=2 -<br>[AMBP_MOUSE]                                                  | 14.90 | 1 | 4 | 4  | 12  | 1.74  | 1.23  | -0.19 | 0.69  |
| A9C437 | Chloride channel protein<br>2 OS=Mus musculus<br>GN=Cln2 PE=2 SV=1 -<br>[A9C437_MOUSE]                                  | 6.40  | 3 | 4 | 4  | 8   | 3.89  | 1.20  | -0.93 | -0.11 |
| Q5S006 | Leucine-rich repeat<br>serine/threonine-protein<br>kinase 2 OS=Mus<br>musculus GN=Lrrk2<br>PE=1 SV=2 -<br>[LRRK2_MOUSE] | 3.17  | 1 | 4 | 6  | 9   | 0.96  | 1.16  | -0.09 | -0.62 |
| Q059P4 | Filamin A interacting<br>protein 1 OS=Mus<br>musculus GN=Filip1<br>PE=2 SV=1 -<br>[Q059P4_MOUSE]                        | 5.77  | 3 | 4 | 5  | 11  | 1.14  | 1.14  | 0.40  | -0.60 |
| E9Q784 | Protein Zc3h13 OS=Mus<br>musculus GN=Zc3h13<br>PE=2 SV=1 -<br>[E9Q784_MOUSE]                                            | 2.95  | 1 | 4 | 6  | 7   | 1.68  | 1.10  | -0.78 | 0.37  |
| Q61635 | GTP-binding protein<br>OS=Mus musculus<br>GN=Ifi47 PE=2 SV=1 -<br>[Q61635_MOUSE]                                        | 14.52 | 6 | 4 | 7  | 25  | 1.02  | 1.06  | 0.43  | 1.05  |
| Q8BH35 | Complement component<br>C8 beta chain OS=Mus<br>musculus GN=C8b<br>PE=1 SV=1 -<br>[CO8B_MOUSE]                          | 10.19 | 2 | 4 | 4  | 11  | 0.89  | 0.97  | 0.18  | 0.70  |

|          |                                                                                                                   |       |   |   |    |    |       |       |       |       |
|----------|-------------------------------------------------------------------------------------------------------------------|-------|---|---|----|----|-------|-------|-------|-------|
| E9PZQ0   | Ryanodine receptor 1<br>OS=Mus musculus<br>GN=Ryr1 PE=1 SV=1 -<br>[RYP1_MOUSE]                                    | 1.37  | 2 | 4 | 8  | 11 | 1.12  | 0.94  | 0.98  | 0.90  |
| Q5DU14-3 | Isoform 3 of<br>Unconventional myosin-<br>XVI OS=Mus musculus<br>GN=Myo16 -<br>[MYO16_MOUSE]                      | 3.38  | 4 | 4 | 6  | 10 | 1.40  | 0.89  | 0.60  | 0.18  |
| A6PWD2   | Forkhead-associated<br>domain-containing<br>protein 1 OS=Mus<br>musculus GN=Fhad1<br>PE=2 SV=1 -<br>[FHAD1_MOUSE] | 3.59  | 3 | 4 | 5  | 6  | 2.84  | 0.88  | 0.54  | -0.61 |
| P29788   | Vitronectin OS=Mus<br>musculus GN=Vtn PE=1<br>SV=2 - [VTNC_MOUSE]                                                 | 11.09 | 1 | 4 | 5  | 13 | 1.22  | 0.86  | 0.52  | 0.91  |
| Q8BXR5   | Sodium leak channel<br>non-selective protein<br>OS=Mus musculus<br>GN=Nalcn PE=1 SV=2 -<br>[NALCN_MOUSE]          | 2.88  | 3 | 4 | 5  | 5  | 2.40  | 0.84  | 0.39  | -0.01 |
| D3YY34   | Polyhomeotic-like<br>protein 3 OS=Mus<br>musculus GN=Phc3<br>PE=4 SV=1 -<br>[D3YY34_MOUSE]                        | 7.28  | 7 | 4 | 4  | 13 | 0.99  | 0.81  | 0.69  | 0.23  |
| P48377   | MHC class II regulatory<br>factor RFX1 OS=Mus<br>musculus GN=Rfx1<br>PE=2 SV=2 -<br>[RFX1_MOUSE]                  | 6.54  | 1 | 4 | 4  | 11 | 1.27  | 0.77  | 0.25  | 0.06  |
| P14069   | Protein S100-A6<br>OS=Mus musculus<br>GN=S100a6 PE=1 SV=3<br>- [S10A6_MOUSE]                                      | 47.19 | 1 | 4 | 4  | 12 | 1.39  | 0.77  | -0.95 | -0.10 |
| Q9QXC1   | Fetuin-B OS=Mus<br>musculus GN=Fetub<br>PE=1 SV=1 -<br>[FETUB_MOUSE]                                              | 14.18 | 2 | 4 | 4  | 14 | 1.92  | 0.75  | -0.90 | -0.18 |
| P82347   | Delta-sarcoglycan<br>OS=Mus musculus<br>GN=Sgcd PE=1 SV=1 -<br>[SGCD_MOUSE]                                       | 13.84 | 2 | 4 | 4  | 7  | 2.79  | 0.74  | 0.16  | 0.04  |
| P97825   | Hematological and<br>neurological expressed<br>1 protein OS=Mus<br>musculus GN=Hn1<br>PE=1 SV=3 -<br>[HN1_MOUSE]  | 41.56 | 1 | 4 | 4  | 45 | 0.87  | 0.73  | 0.54  | 0.19  |
| P84228   | Histone H3.2 OS=Mus<br>musculus GN=Hist1h3b<br>PE=1 SV=2 -<br>[H32_MOUSE]                                         | 59.56 | 2 | 3 | 11 | 54 | -1.09 | -1.88 | -1.75 | -1.67 |
| Q8CEG5   | Coiled-coil domain-<br>containing protein 28B<br>OS=Mus musculus<br>GN=Ccdc28b PE=2<br>SV=3 -<br>[CC28B_MOUSE]    | 20.50 | 4 | 3 | 3  | 7  | -0.91 | -1.64 | -0.14 | -1.02 |
| E9PWQ6   | Serine/threonine-protein<br>kinase 31 OS=Mus<br>musculus GN=Stk31<br>PE=2 SV=1 -<br>[E9PWQ6_MOUSE]                | 3.80  | 4 | 3 | 3  | 4  | -1.14 | -1.54 | 0.00  | -0.36 |
| Q8BHJ6   | Serine incorporator 5<br>OS=Mus musculus<br>GN=Serinc5 PE=2 SV=1<br>- [SERC5_MOUSE]                               | 7.59  | 1 | 3 | 3  | 4  | -0.63 | -1.47 | 0.17  | 0.42  |

|          |                                                                                                                     |       |   |   |    |     |       |       |       |       |
|----------|---------------------------------------------------------------------------------------------------------------------|-------|---|---|----|-----|-------|-------|-------|-------|
| A2AVN2   | Glycoprotein hormones alpha chain (Fragment)<br>OS=Mus musculus<br>GN=Cga PE=2 SV=1 - [A2AVN2_MOUSE]                | 12.82 | 2 | 3 | 3  | 16  | -0.99 | -1.31 | -3.22 | -3.16 |
| P62274   | 40S ribosomal protein S29 OS=Mus musculus<br>GN=Rps29 PE=2 SV=2 - [RS29_MOUSE]                                      | 25.00 | 2 | 3 | 3  | 5   | -1.04 | -0.98 | -0.45 | -0.44 |
| Q8K2P7   | Sodium-coupled neutral amino acid transporter 1 OS=Mus musculus<br>GN=Slc38a1 PE=1 SV=1 - [S38A1_MOUSE]             | 5.36  | 2 | 3 | 3  | 6   | -0.87 | -0.96 | -0.58 | -0.10 |
| Q9JJK8   | Serine/threonine-protein kinase ATR OS=Mus musculus<br>GN=ATR PE=1 SV=2 - [ATR_MOUSE]                               | 1.21  | 2 | 3 | 3  | 3   | -0.91 | -0.95 | -0.11 | 0.01  |
| Q5U452   | MCG14616 OS=Mus musculus<br>GN=2810408M09Rik PE=2 SV=1 - [Q5U452_MOUSE]                                             | 13.52 | 4 | 3 | 3  | 5   | -0.84 | -0.90 | -0.39 | -0.13 |
| P18872-2 | Isoform Alpha-2 of Guanine nucleotide-binding protein G(o) subunit alpha OS=Mus musculus<br>GN=Gnao1 - [GNAO_MOUSE] | 64.97 | 5 | 3 | 23 | 492 | -1.33 | -0.87 | 0.10  | 0.26  |
| Q9JJG9   | Nitric oxide-associated protein 1 OS=Mus musculus<br>GN=Noa1 PE=1 SV=1 - [NOA1_MOUSE]                               | 7.07  | 1 | 3 | 3  | 6   | -1.00 | -0.86 | -0.08 | 0.85  |
| Q7TNK1   | Transcription factor RFX4 OS=Mus musculus<br>GN=Rfx4 PE=1 SV=1 - [RFX4_MOUSE]                                       | 11.16 | 4 | 3 | 3  | 4   | -1.53 | -0.82 | 0.05  | -0.06 |
| Q80SY5   | Pre-mRNA-splicing factor 38B OS=Mus musculus<br>GN=Prpf38b PE=1 SV=1 - [PR38B_MOUSE]                                | 6.09  | 1 | 3 | 3  | 6   | -0.89 | -0.78 | -0.20 | -0.04 |
| O35972   | 39S ribosomal protein L23, mitochondrial OS=Mus musculus<br>GN=Mrlp23 PE=2 SV=1 - [RM23_MOUSE]                      | 33.56 | 1 | 3 | 3  | 10  | -0.85 | -0.77 | -0.34 | -0.16 |
| P58501   | PAX3- and PAX7-binding protein 1 OS=Mus musculus<br>GN=Paxbp1 PE=1 SV=3 - [PAXB1_MOUSE]                             | 2.29  | 3 | 3 | 3  | 11  | -0.84 | -0.74 | -0.21 | -0.14 |
| Q66JZ4   | T-cell activation inhibitor, mitochondrial OS=Mus musculus<br>GN=TCAIM PE=2 SV=1 - [TCAIM_MOUSE]                    | 8.42  | 3 | 3 | 3  | 5   | -0.66 | -0.68 | -0.01 | 0.17  |
| Q8CFP6   | DnaJ homolog subfamily C member 27 OS=Mus musculus<br>GN=Dnajc27 PE=2 SV=1 - [DJC27_MOUSE]                          | 11.72 | 1 | 3 | 3  | 8   | -0.61 | -0.67 | -0.22 | -0.13 |
| Q61070   | Etoposide-induced protein 2.4 OS=Mus musculus<br>GN=EI24 PE=1 SV=3 - [EI24_MOUSE]                                   | 6.47  | 1 | 3 | 3  | 7   | -0.86 | -0.67 | -0.28 | -0.31 |

|          |                                                                                                                                     |       |   |   |    |     |       |       |       |       |
|----------|-------------------------------------------------------------------------------------------------------------------------------------|-------|---|---|----|-----|-------|-------|-------|-------|
| Q8VDS7   | Centrosomal protein<br>CEP57L1 OS=Mus<br>musculus GN=Cep5711<br>PE=2 SV=1 -<br>[CE57L_MOUSE]                                        | 17.50 | 5 | 3 | 3  | 6   | -0.67 | -0.63 | 0.11  | -0.17 |
| Q9D2U9   | Histone H2B type 3-A<br>OS=Mus musculus<br>GN=Hist3h2ba PE=1<br>SV=3 -<br>[H2B3A_MOUSE]                                             | 77.78 | 2 | 3 | 14 | 216 | -0.65 | -0.61 | -0.37 | -0.13 |
| Q9ES63   | Ubiquitin carboxyl-<br>terminal hydrolase 29<br>OS=Mus musculus<br>GN=Usp29 PE=2 SV=2 -<br>[UBP29_MOUSE]                            | 4.26  | 1 | 3 | 3  | 8   | -1.54 | -0.60 | -0.71 | 0.01  |
| Q9D023   | Mitochondrial pyruvate<br>carrier 2 OS=Mus<br>musculus GN=Mpc2<br>PE=1 SV=1 -<br>[MPC2_MOUSE]                                       | 21.26 | 3 | 3 | 4  | 25  | -1.33 | -0.59 | -0.24 | -0.04 |
| Q9CQV5   | 28S ribosomal protein<br>S24, mitochondrial<br>OS=Mus musculus<br>GN=Mrps24 PE=2 SV=1<br>- [RT24_MOUSE]                             | 13.77 | 1 | 3 | 3  | 5   | -0.66 | -0.59 | 0.00  | 0.00  |
| Q80X41-2 | Isoform 2 of<br>Serine/threonine-protein<br>kinase VRK1 OS=Mus<br>musculus GN=Vrk1 -<br>[VRK1_MOUSE]                                | 9.60  | 4 | 3 | 3  | 5   | -0.69 | -0.59 | 0.05  | -0.18 |
| Q9D1N9   | 39S ribosomal protein<br>L21, mitochondrial<br>OS=Mus musculus<br>GN=Mrpl21 PE=2 SV=1 -<br>[RM21_MOUSE]                             | 18.66 | 2 | 3 | 3  | 6   | -0.82 | -0.58 | -0.30 | -0.40 |
| P01863   | Ig gamma-2A chain C<br>region, A allele OS=Mus<br>musculus GN=Ighg<br>PE=1 SV=1 -<br>[GCAA_MOUSE]                                   | 15.45 | 3 | 3 | 4  | 14  | 1.85  | 3.26  | -2.50 | 0.10  |
| Q0GGX2-2 | Isoform 2 of Zinc finger<br>protein 541 OS=Mus<br>musculus GN=Znf541 -<br>[ZN541_MOUSE]                                             | 3.69  | 2 | 3 | 3  | 6   | 1.88  | 2.17  | 1.21  | -0.16 |
| Q60590   | Alpha-1-acid<br>glycoprotein 1 OS=Mus<br>musculus GN=Orm1<br>PE=1 SV=1 -<br>[A1AG1_MOUSE]                                           | 20.77 | 1 | 3 | 5  | 10  | 2.36  | 1.75  | 1.66  | 2.19  |
| Q9EQR6   | Fanconi anemia group G<br>protein homolog<br>OS=Mus musculus<br>GN=Fancg PE=2 SV=1 -<br>[FANCG_MOUSE]                               | 13.16 | 1 | 3 | 3  | 4   | 2.28  | 1.65  | 0.16  | 0.44  |
| P07309   | Transferrin OS=Mus<br>musculus GN=Ttr PE=1<br>SV=1 - [TTHY_MOUSE]                                                                   | 15.65 | 4 | 3 | 3  | 6   | 2.14  | 1.60  | 0.01  | 0.57  |
| Q8BYN2   | DNA segment, Chr 2,<br>ERATO Doi 435,<br>expressed, isoform<br>CRA_e OS=Mus<br>musculus GN=Tubgcp4<br>PE=2 SV=1 -<br>[Q8BYN2_MOUSE] | 9.16  | 3 | 3 | 5  | 14  | 1.10  | 1.51  | 0.08  | -0.05 |
| Q91WD8   | Protein Slc24a1<br>OS=Mus musculus<br>GN=Slc24a1 PE=2<br>SV=1 -<br>[Q91WD8_MOUSE]                                                   | 5.31  | 1 | 3 | 3  | 4   | 1.86  | 1.48  | -0.44 | -0.87 |

|          |                                                                                                             |       |   |   |    |     |      |      |       |       |
|----------|-------------------------------------------------------------------------------------------------------------|-------|---|---|----|-----|------|------|-------|-------|
| Q8BML1-2 | Isoform 2 of Protein-methionine sulfoxide oxidase MICAL2<br>OS=Mus musculus<br>GN=Mical2 -<br>[MICA2_MOUSE] | 8.17  | 4 | 3 | 8  | 14  | 1.73 | 1.47 | -1.16 | 0.39  |
| P04117   | Fatty acid-binding protein, adipocyte<br>OS=Mus musculus<br>GN=Fabp4 PE=1 SV=3 -<br>[FABP4_MOUSE]           | 22.73 | 3 | 3 | 3  | 11  | 2.95 | 1.44 | -0.85 | 0.00  |
| G3X9R0   | MCG68164 OS=Mus musculus<br>GN=Cylc1 PE=4 SV=1 -<br>[G3X9R0_MOUSE]                                          | 5.47  | 1 | 3 | 3  | 3   | 1.79 | 1.40 | 0.31  | -0.01 |
| P70121   | Zinc fingers and homeobox protein 1<br>OS=Mus musculus<br>GN=Zhx1 PE=1 SV=2 -<br>[ZHX1_MOUSE]               | 5.04  | 2 | 3 | 4  | 7   | 1.32 | 1.32 | 1.20  | 1.20  |
| F7BJ98   | Protein Nbeal1 (Fragment)<br>OS=Mus musculus<br>GN=Nbeal1 PE=2 SV=1 -<br>[F7BJ98_MOUSE]                     | 3.81  | 2 | 3 | 3  | 4   | 3.87 | 1.30 | 0.01  | -0.62 |
| P22599   | Alpha-1-antitrypsin 1-2<br>OS=Mus musculus<br>GN=Serpina1b PE=1 SV=2 -<br>[A1AT2_MOUSE]                     | 47.46 | 2 | 3 | 15 | 166 | 1.55 | 1.26 | -0.70 | 0.10  |
| Q64726   | Zinc-alpha-2-glycoprotein<br>OS=Mus musculus<br>GN=Azgp1 PE=1 SV=2 -<br>[ZA2G_MOUSE]                        | 11.73 | 1 | 3 | 3  | 3   | 0.96 | 1.24 | -0.38 | 0.37  |
| Q8CII2   | Cell division cycle protein 123 homolog<br>OS=Mus musculus<br>GN=Cdc123 PE=2 SV=2 -<br>[CD123_MOUSE]        | 11.31 | 2 | 3 | 4  | 16  | 0.89 | 1.14 | 0.91  | 0.59  |
| Q60571   | Corticotropin-releasing factor-binding protein<br>OS=Mus musculus<br>GN=Crhbp PE=2 SV=1 -<br>[CRHBP_MOUSE]  | 15.22 | 1 | 3 | 3  | 3   | 0.87 | 1.13 | 0.01  | 0.07  |
| D3YWJ0   | Protein Nuggc<br>OS=Mus musculus<br>GN=Nuggc PE=4 SV=1 -<br>[D3YWJ0_MOUSE]                                  | 8.17  | 2 | 3 | 3  | 4   | 2.16 | 1.09 | -0.16 | 0.67  |
| A2AQ07   | Tubulin beta-1 chain<br>OS=Mus musculus<br>GN=Tubb1 PE=1 SV=1 -<br>[TBB1_MOUSE]                             | 31.93 | 1 | 3 | 11 | 485 | 1.17 | 1.09 | 0.26  | 0.41  |
| Q5DTW7-3 | Isoform 3 of Uncharacterized protein KIAA1551<br>OS=Mus musculus<br>GN=Kiaa1551 -<br>[K1551_MOUSE]          | 2.76  | 5 | 3 | 3  | 5   | 2.23 | 1.08 | 0.03  | 0.45  |
| E9PVX6   | Protein Mki67<br>OS=Mus musculus<br>GN=Mki67 PE=2 SV=1 -<br>[E9PVX6_MOUSE]                                  | 1.07  | 1 | 3 | 3  | 3   | 1.67 | 1.03 | 1.94  | 0.59  |
| P05367   | Serum amyloid A-2 protein<br>OS=Mus musculus<br>GN=Saa2 PE=1 SV=1 -<br>[SAA2_MOUSE]                         | 28.69 | 1 | 3 | 4  | 12  | 0.93 | 0.89 | 3.45  | 4.60  |
| P57774   | Pro-neuropeptide Y<br>OS=Mus musculus<br>GN=Npy PE=2 SV=2 -<br>[NPY_MOUSE]                                  | 28.87 | 1 | 3 | 3  | 23  | 1.15 | 0.86 | 0.39  | 0.02  |



|        |                                                                                                                                       |       |   |   |   |    |      |      |       |       |
|--------|---------------------------------------------------------------------------------------------------------------------------------------|-------|---|---|---|----|------|------|-------|-------|
| Q9D8H7 | Metalloendopeptidase<br>OMA1, mitochondrial<br>OS=Mus musculus<br>GN=Oma1 PE=2 SV=1 -<br>[OMA1_MOUSE]                                 | 5.18  | 1 | 3 | 3 | 3  | 1.01 | 0.83 | 0.68  | 1.45  |
| Q3UU35 | Ovostatin homolog<br>OS=Mus musculus<br>GN=Ovos PE=2 SV=2 -<br>[OVOS_MOUSE]                                                           | 4.40  | 1 | 3 | 3 | 3  | 1.60 | 0.82 | -0.30 | 0.16  |
| Q62361 | Pro-thyrotropin-releasing<br>hormone OS=Mus<br>musculus GN=Trh PE=2<br>SV=2 - [TRH_MOUSE]                                             | 10.94 | 1 | 3 | 3 | 4  | 1.34 | 0.82 | -0.72 | -0.02 |
| O88508 | DNA (cytosine-5)-<br>methyltransferase 3A<br>OS=Mus musculus<br>GN=Dnmt3a PE=1<br>SV=2 -<br>[DNM3A_MOUSE]                             | 5.51  | 6 | 3 | 3 | 6  | 1.22 | 0.79 | 0.38  | -0.83 |
| Q6NXH3 | Vasculin OS=Mus<br>musculus GN=Gbp1<br>PE=1 SV=1 -<br>[GPBP1_MOUSE]                                                                   | 10.15 | 4 | 3 | 4 | 11 | 1.20 | 0.77 | 0.44  | -0.01 |
| G3UWF6 | MCG1027453 OS=Mus<br>musculus<br>GN=2010015L04Rik<br>PE=4 SV=1 -<br>[G3UWF6_MOUSE]                                                    | 25.58 | 3 | 3 | 4 | 6  | 1.49 | 0.77 | 0.16  | 0.15  |
| Q9CR27 | WASH complex subunit<br>CCDC53 OS=Mus<br>musculus GN=Ccdc53<br>PE=2 SV=1 -<br>[CCD53_MOUSE]                                           | 23.71 | 2 | 3 | 3 | 12 | 1.70 | 0.76 | 0.24  | 0.74  |
| Q8VCE1 | DnaJ homolog subfamily<br>C member 28 OS=Mus<br>musculus GN=Dnajc28<br>PE=2 SV=2 -<br>[DJC28_MOUSE]                                   | 7.01  | 3 | 3 | 3 | 8  | 1.15 | 0.74 | 0.13  | -0.24 |
| Q80YC5 | Coagulation factor XII<br>OS=Mus musculus<br>GN=F12 PE=2 SV=2 -<br>[FA12_MOUSE]                                                       | 6.87  | 1 | 3 | 3 | 8  | 2.21 | 0.74 | -0.93 | 0.03  |
| Q8C804 | Spindle and centriole-<br>associated protein 1<br>OS=Mus musculus<br>GN=Spice1 PE=1 SV=2 -<br>[SPICE_MOUSE]                           | 5.35  | 1 | 3 | 3 | 4  | 1.39 | 0.70 | 0.40  | 0.09  |
| E9Q7P2 | Protein Cacna1i<br>OS=Mus musculus<br>GN=Cacna1i PE=2<br>SV=1 -<br>[E9Q7P2_MOUSE]                                                     | 3.59  | 3 | 3 | 5 | 7  | 2.20 | 0.69 | 0.33  | -0.11 |
| Q810D6 | Glutamate-rich WD<br>repeat-containing<br>protein 1 OS=Mus<br>musculus GN=Grwd1<br>PE=2 SV=2 -<br>[GRWD1_MOUSE]                       | 15.02 | 3 | 3 | 3 | 4  | 1.04 | 0.68 | 0.45  | -0.50 |
| Q80SZ7 | Guanine nucleotide-<br>binding protein<br>G(I)(G(S))G(O) subunit<br>gamma-5 OS=Mus<br>musculus GN=Gng5<br>PE=2 SV=2 -<br>[GBG5_MOUSE] | 33.82 | 2 | 3 | 3 | 12 | 0.99 | 0.68 | 0.54  | 0.55  |
| D3Z375 | Astrocytic<br>phosphoprotein PEA-15<br>(Fragment) OS=Mus<br>musculus GN=Pea15a<br>PE=2 SV=1 -<br>[D3Z375_MOUSE]                       | 64.13 | 2 | 3 | 5 | 96 | 0.95 | 0.67 | 0.49  | -0.03 |

|          |                                                                                                     |       |   |   |     |     |       |       |       |       |
|----------|-----------------------------------------------------------------------------------------------------|-------|---|---|-----|-----|-------|-------|-------|-------|
| Q8BSI6   | R3H and coiled-coil domain-containing protein 1 OS=Mus musculus GN=R3hcc1 PE=2 SV=2 - [R3HC1_MOUSE] | 8.05  | 2 | 3 | 3   | 4   | 1.38  | 0.63  | -0.11 | -0.45 |
| Q8CDJ6   | Protein 4932411E22Rik OS=Mus musculus GN=4932411E22Rik PE=2 SV=1 - [Q8CDJ6_MOUSE]                   | 9.68  | 1 | 3 | 3   | 4   | 0.86  | 0.62  | 0.43  | 0.33  |
| P08071   | Lactotransferrin OS=Mus musculus GN=Ltf PE=2 SV=4 - [TRFL_MOUSE]                                    | 8.06  | 1 | 3 | 4   | 8   | 1.83  | 0.62  | 0.15  | 0.42  |
| O88968   | Transcobalamin-2 OS=Mus musculus GN=Tcn2 PE=2 SV=1 - [TCO2_MOUSE]                                   | 10.23 | 1 | 3 | 3   | 6   | 1.54  | 0.62  | -0.26 | -0.41 |
| G3X9G6   | Luteinizing hormone beta OS=Mus musculus GN=Lhb PE=3 SV=1 - [G3X9G6_MOUSE]                          | 21.99 | 2 | 2 | 2   | 9   | -2.30 | -2.91 | -4.79 | -4.91 |
| F8VQD3   | Protein Vmn2r37 OS=Mus musculus GN=Vmn2r37 PE=3 SV=1 - [F8VQD3_MOUSE]                               | 4.24  | 2 | 2 | 2   | 3   | -3.39 | -2.27 | -2.91 | -2.57 |
| Q80VA0   | N-acetylgalactosaminyltransferase 7 OS=Mus musculus GN=Galnt7 PE=2 SV=2 - [GALT7_MOUSE]             | 3.81  | 3 | 2 | 2   | 2   | -0.61 | -2.22 | 0.76  | 0.48  |
| P68404   | Protein kinase C beta type OS=Mus musculus GN=Prkcb PE=1 SV=4 - [KPCB_MOUSE]                        | 41.73 | 1 | 2 | 28  | 140 | -0.88 | -1.99 | -0.05 | 0.49  |
| Q8CBY1-4 | Isoform 4 of Protein Smaug homolog 1 OS=Mus musculus GN=Samd4a - [SMAG1_MOUSE]                      | 11.59 | 4 | 2 | 2   | 4   | -0.82 | -1.80 | -0.55 | 0.22  |
| P13011   | Acyl-CoA desaturase 2 OS=Mus musculus GN=Scd2 PE=2 SV=2 - [ACOD2_MOUSE]                             | 3.91  | 3 | 2 | 2   | 5   | -0.61 | -1.32 | -0.47 | -0.24 |
| D3YUR6   | Transmembrane protein 169 (Fragment) OS=Mus musculus GN=Tmem169 PE=2 SV=1 - [D3YUR6_MOUSE]          | 21.67 | 2 | 2 | 2   | 3   | -0.70 | -1.31 | -0.55 | -1.18 |
| Q8BG15-5 | Isoform 5 of CTD small phosphatase-like protein 2 OS=Mus musculus GN=Ctdspl2 - [CTSL2_MOUSE]        | 5.08  | 6 | 2 | 2   | 7   | -1.56 | -1.29 | -0.06 | -0.24 |
| Q91ZU6   | Dystonin OS=Mus musculus GN=Dst PE=1 SV=1 - [DYST_MOUSE]                                            | 24.24 | 5 | 2 | 160 | 508 | -1.01 | -1.27 | -0.23 | -0.12 |
| Q80Z11   | TMF-regulated nuclear protein 1 OS=Mus musculus GN=Trnp1 PE=1 SV=1 - [TRNP1_MOUSE]                  | 14.80 | 1 | 2 | 2   | 3   | -0.77 | -1.25 | 0.14  | -0.34 |
| Q80TC5   | Pogo transposable element with KRAB domain OS=Mus musculus GN=Pogk PE=2 SV=2 - [POGK_MOUSE]         | 3.13  | 2 | 2 | 2   | 2   | -0.74 | -1.07 | -0.36 | -0.30 |

|          |                                                                                                                                         |       |    |   |    |      |       |       |       |       |
|----------|-----------------------------------------------------------------------------------------------------------------------------------------|-------|----|---|----|------|-------|-------|-------|-------|
| A2A6P4   | Protein Fam104a<br>OS=Mus musculus<br>GN=Fam104a PE=2<br>SV=1 -<br>[A2A6P4_MOUSE]                                                       | 15.68 | 1  | 2 | 2  | 5    | -1.06 | -1.06 | -0.30 | -0.28 |
| Q0P5V9-3 | Isoform 3 of Solute<br>carrier family 45<br>member 4 OS=Mus<br>musculus GN=Slc45a4 -<br>[S45A4_MOUSE]                                   | 5.92  | 4  | 2 | 2  | 2    | -0.96 | -1.03 | -0.03 | -0.10 |
| Q9CWF2   | Tubulin beta-2B chain<br>OS=Mus musculus<br>GN=Tubb2b PE=1 SV=1<br>- [TBB2B_MOUSE]                                                      | 83.82 | 2  | 2 | 33 | 4745 | -0.72 | -1.02 | -1.26 | -1.04 |
| Q8BP78   | Protein FRA10AC1<br>homolog OS=Mus<br>musculus GN=Fra10ac1<br>PE=1 SV=3 -<br>[F10C1_MOUSE]                                              | 9.21  | 1  | 2 | 2  | 3    | -0.72 | -1.02 | -0.33 | -0.54 |
| E9QMD2   | Ubiquitin-conjugating<br>enzyme E2Q-like protein<br>1 OS=Mus musculus<br>GN=Ube2q1 PE=2<br>SV=1 -<br>[E9QMD2_MOUSE]                     | 13.16 | 1  | 2 | 2  | 7    | -0.85 | -1.01 | -0.14 | -0.69 |
| Q9WV03   | Protein FAM50A<br>OS=Mus musculus<br>GN=Fam50a PE=2<br>SV=1 -<br>[FA50A_MOUSE]                                                          | 7.37  | 1  | 2 | 2  | 6    | -1.23 | -0.92 | -0.23 | -0.43 |
| Q9WV19   | Cytochrome P450,<br>family 2, subfamily g,<br>polypeptide 1 OS=Mus<br>musculus GN=Cyp2g1<br>PE=2 SV=1 -<br>[Q9WV19_MOUSE]               | 6.48  | 1  | 2 | 2  | 2    | -1.37 | -0.89 | -0.15 | -0.17 |
| Q8VIF5   | Low affinity neurotensin<br>receptor OS=Mus<br>musculus GN=Ntr2<br>PE=2 SV=1 -<br>[Q8VIF5_MOUSE]                                        | 6.25  | 2  | 2 | 2  | 9    | -1.05 | -0.84 | -0.44 | 0.39  |
| Q3TXX3-2 | Isoform 2 of Protrudin<br>OS=Mus musculus<br>GN=Zfyve27 -<br>[ZFY27_MOUSE]                                                              | 7.11  | 3  | 2 | 2  | 8    | -0.64 | -0.75 | -0.12 | -0.09 |
| Q3TZM9-2 | Isoform 2 of GDP-<br>Man:Man(3)GlcNAc(2)-<br>PP-Dol alpha-1,2-<br>mannosyltransferase<br>OS=Mus musculus<br>GN=Alg11 -<br>[ALG11_MOUSE] | 7.56  | 4  | 2 | 2  | 8    | -0.94 | -0.74 | -0.45 | 0.04  |
| Q91WB2   | Probable lipid phosphate<br>phosphatase PPAPDC3<br>OS=Mus musculus<br>GN=Ppapdc3 PE=1<br>SV=1 -<br>[PPAC3_MOUSE]                        | 6.27  | 1  | 2 | 2  | 16   | -1.18 | -0.74 | 0.36  | -0.26 |
| Q9D8B6   | Protein FAM210B<br>OS=Mus musculus<br>GN=Fam210b PE=2<br>SV=3 -<br>[F210B_MOUSE]                                                        | 13.16 | 1  | 2 | 2  | 6    | -1.06 | -0.72 | 0.38  | 0.26  |
| Q9EQ61   | Pescadillo homolog<br>OS=Mus musculus<br>GN=Pes1 PE=1 SV=1 -<br>[PESC_MOUSE]                                                            | 3.60  | 2  | 2 | 2  | 3    | -1.03 | -0.70 | -0.69 | -0.14 |
| P28740-1 | Isoform 1 of Kinesin-like<br>protein KIF2A OS=Mus<br>musculus GN=Kif2a -<br>[KIF2A_MOUSE]                                               | 51.82 | 11 | 2 | 30 | 176  | -1.05 | -0.70 | 0.09  | -0.10 |

|          |                                                                                                                 |       |   |   |    |     |       |       |       |       |
|----------|-----------------------------------------------------------------------------------------------------------------|-------|---|---|----|-----|-------|-------|-------|-------|
| F6QP10   | Sn1-specific diacylglycerol lipase beta (Fragment)<br>OS=Mus musculus<br>GN=Daglb PE=4 SV=2 -<br>[F6QP10_MOUSE] | 4.09  | 2 | 2 | 2  | 3   | -1.85 | -0.68 | 0.24  | 0.41  |
| E9Q6K3   | Protein Pibf1 OS=Mus musculus<br>GN=Pibf1 PE=2 SV=1 -<br>[E9Q6K3_MOUSE]                                         | 2.65  | 1 | 2 | 3  | 7   | -0.65 | -0.68 | -0.20 | -0.14 |
| Q64522   | Histone H2A type 2-B OS=Mus musculus<br>GN=Hist2h2ab PE=1 SV=3 -<br>[H2A2B_MOUSE]                               | 34.62 | 1 | 2 | 3  | 92  | -0.94 | -0.65 | -0.24 | 0.28  |
| Q61037-4 | Isoform C of Tuberin OS=Mus musculus<br>GN=Tsc2 -<br>[TSC2_MOUSE]                                               | 20.45 | 5 | 2 | 24 | 80  | -1.28 | -0.65 | 0.05  | -0.06 |
| Q9QZ18   | Serine incorporator 1 OS=Mus musculus<br>GN=Serinc1 PE=1 SV=1 -<br>[SERC1_MOUSE]                                | 5.74  | 1 | 2 | 2  | 2   | -1.51 | -0.65 | -0.45 | -0.87 |
| Q8BGF8   | Solute carrier family 35 member D3 OS=Mus musculus<br>GN=Slc35d3 PE=2 SV=1 -<br>[S35D3_MOUSE]                   | 5.69  | 1 | 2 | 2  | 5   | -0.82 | -0.61 | 0.51  | 0.35  |
| P70279   | Surfeit locus protein 6 OS=Mus musculus<br>GN=Surf6 PE=2 SV=1 -<br>[SURF6_MOUSE]                                | 10.14 | 2 | 2 | 4  | 4   | -0.84 | -0.60 | 0.03  | -0.03 |
| Q80TJ7   | Histone lysine demethylase PHF8 OS=Mus musculus<br>GN=Phf8 PE=1 SV=2 -<br>[PHF8_MOUSE]                          | 3.52  | 4 | 2 | 3  | 5   | -0.76 | -0.60 | -0.35 | -0.55 |
| Q9N32    | Beta-klotho OS=Mus musculus<br>GN=Klb PE=1 SV=1 -<br>[KLOTB_MOUSE]                                              | 2.01  | 2 | 2 | 2  | 2   | -0.94 | -0.60 | 0.32  | 0.13  |
| Q8K0P3   | TLD domain-containing protein 1 OS=Mus musculus<br>GN=Tldc1 PE=2 SV=1 -<br>[TLDC1_MOUSE]                        | 7.25  | 1 | 2 | 2  | 5   | -0.69 | -0.60 | -0.42 | -0.38 |
| Q80WW9   | DDRCK domain-containing protein 1 OS=Mus musculus<br>GN=Drck1 PE=1 SV=2 -<br>[DDRCK_MOUSE]                      | 9.84  | 1 | 2 | 2  | 4   | -0.66 | -0.59 | -0.43 | -0.31 |
| Q9Z1B8   | PHD finger protein 1 OS=Mus musculus<br>GN=Phf1 PE=1 SV=2 -<br>[PHF1_MOUSE]                                     | 9.12  | 1 | 2 | 2  | 5   | -0.79 | -0.58 | -0.28 | -0.04 |
| Q9WTL4   | Insulin receptor-related protein OS=Mus musculus<br>GN=Insrr PE=1 SV=2 -<br>[INSRR_MOUSE]                       | 2.54  | 1 | 2 | 3  | 4   | 2.33  | 3.59  | -0.41 | -0.82 |
| Q8R366   | Immunoglobulin superfamily member 8 OS=Mus musculus<br>GN=Igsf8 PE=1 SV=2 -<br>[IGSF8_MOUSE]                    | 35.68 | 2 | 2 | 17 | 151 | 1.33  | 2.96  | 2.76  | 3.72  |
| P31532   | Serum amyloid A-4 protein OS=Mus musculus<br>GN=Saa4 PE=1 SV=2 -<br>[SAA4_MOUSE]                                | 22.31 | 1 | 2 | 2  | 4   | 0.89  | 2.73  | 0.31  | 1.32  |

|          |                                                                                                          |       |   |   |   |    |      |      |       |       |
|----------|----------------------------------------------------------------------------------------------------------|-------|---|---|---|----|------|------|-------|-------|
| Q7TQE7-2 | Isoform 2 of Uncharacterized protein KIAA0895 OS=Mus musculus GN=Kiaa0895 - [K0895_MOUSE]                | 10.55 | 2 | 2 | 2 | 2  | 4.21 | 2.35 | -1.41 | -2.66 |
| P33622   | Apolipoprotein C-III OS=Mus musculus GN=Apoc3 PE=2 SV=2 - [APOC3_MOUSE]                                  | 27.27 | 2 | 2 | 2 | 16 | 1.95 | 2.22 | -1.05 | -0.07 |
| P57725   | SAM domain-containing protein SAMSN-1 OS=Mus musculus GN=Samsn1 PE=1 SV=2 - [SAMN1_MOUSE]                | 8.33  | 2 | 2 | 2 | 2  | 1.88 | 2.17 | 0.71  | 0.66  |
| P52927   | High mobility group protein HMGI-C OS=Mus musculus GN=Hmga2 PE=1 SV=1 - [HMGA2_MOUSE]                    | 32.41 | 2 | 2 | 2 | 3  | 1.48 | 2.10 | 2.00  | 0.21  |
| Q6NXY1   | WD repeat-containing protein 67 OS=Mus musculus GN=Wdr67 PE=2 SV=1 - [WDR67_MOUSE]                       | 2.11  | 3 | 2 | 2 | 2  | 5.19 | 2.04 | 1.91  | -0.37 |
| G3UWX1   | Replication factor C subunit 1 OS=Mus musculus GN=Rfc1 PE=2 SV=1 - [G3UWX1_MOUSE]                        | 2.39  | 6 | 2 | 2 | 2  | 3.92 | 1.96 | 1.34  | 0.03  |
| E9Q5X9   | Protein Zfp819 OS=Mus musculus GN=Zfp819 PE=2 SV=1 - [E9Q5X9_MOUSE]                                      | 8.10  | 2 | 2 | 2 | 2  | 1.94 | 1.89 | 0.51  | -0.30 |
| A2A4B4   | EMILIN-3 OS=Mus musculus GN=Emilin3 PE=2 SV=1 - [A2A4B4_MOUSE]                                           | 3.23  | 2 | 2 | 2 | 3  | 1.40 | 1.80 | -0.98 | 0.09  |
| Q80ZJ8   | EF-hand calcium-binding domain-containing protein 4A OS=Mus musculus GN=Efcab4a PE=2 SV=2 - [EFC4_MOUSE] | 8.63  | 3 | 2 | 3 | 5  | 1.01 | 1.73 | 0.63  | 0.35  |
| P56400   | Platelet glycoprotein Ib beta chain OS=Mus musculus GN=Gp1bb PE=1 SV=1 - [GP1BB_MOUSE]                   | 13.11 | 2 | 2 | 2 | 4  | 0.98 | 1.65 | -0.06 | 0.55  |
| P62878   | E3 ubiquitin-protein ligase RBX1 OS=Mus musculus GN=Rbx1 PE=1 SV=1 - [RBX1_MOUSE]                        | 23.15 | 1 | 2 | 2 | 8  | 2.57 | 1.56 | 0.57  | -0.15 |
| Q91ZD1-2 | Isoform 2 of Protein odd-skipped-related 2 OS=Mus musculus GN=Osr2 - [OSR2_MOUSE]                        | 9.42  | 3 | 2 | 2 | 2  | 4.74 | 1.56 | 0.29  | -0.25 |
| Q9JJ94   | Sjogren syndrome nuclear autoantigen 1 homolog OS=Mus musculus GN=Ssna1 PE=1 SV=1 - [SSNA1_MOUSE]        | 23.53 | 1 | 2 | 2 | 6  | 3.20 | 1.51 | 1.37  | 0.60  |
| Q69ZB3   | Testis-specific Y-encoded-like protein 5 OS=Mus musculus GN=Tspy15 PE=2 SV=2 - [TSYL5_MOUSE]             | 7.88  | 1 | 2 | 2 | 3  | 1.67 | 1.50 | 0.53  | 0.25  |

|          |                                                                                                                       |       |    |   |    |     |      |      |       |       |
|----------|-----------------------------------------------------------------------------------------------------------------------|-------|----|---|----|-----|------|------|-------|-------|
| Q8CGT2   | Baculoviral IAP repeat-containing protein 1e<br>OS=Mus musculus<br>GN=Naip5 PE=2 SV=1 -<br>[Q8CGT2_MOUSE]             | 2.21  | 2  | 2 | 2  | 2   | 4.19 | 1.49 | -0.28 | -1.44 |
| Q60994   | Adiponectin OS=Mus musculus<br>GN=Adipoq PE=1 SV=2 -<br>[ADIPO_MOUSE]                                                 | 9.72  | 2  | 2 | 2  | 3   | 1.54 | 1.46 | -0.89 | -0.18 |
| P58774-2 | Isoform 2 of Tropomyosin beta chain<br>OS=Mus musculus<br>GN=Tpm2 -<br>[TPM2_MOUSE]                                   | 48.94 | 2  | 2 | 16 | 208 | 0.93 | 1.44 | 0.31  | 0.26  |
| A6PWB3   | Protein C87977 (Fragment) OS=Mus musculus<br>GN=C87977 PE=2 SV=1 -<br>[A6PWB3_MOUSE]                                  | 14.81 | 15 | 2 | 2  | 3   | 1.20 | 1.43 | 0.53  | -0.36 |
| Q7TMA2   | Zinc finger protein 503<br>OS=Mus musculus<br>GN=Znf503 PE=2 SV=1<br>[ZN503_MOUSE]                                    | 5.67  | 2  | 2 | 3  | 5   | 1.99 | 1.38 | 0.21  | 0.50  |
| Q9CQW3   | Vitamin K-dependent protein Z OS=Mus musculus<br>GN=Proz PE=1 SV=1 -<br>[PROZ_MOUSE]                                  | 5.01  | 1  | 2 | 2  | 5   | 2.42 | 1.35 | -0.71 | 0.05  |
| Q3UVD5   | Leucine-rich repeat-containing G-protein coupled receptor 6<br>OS=Mus musculus<br>GN=Lgr6 PE=2 SV=1 -<br>[LGR6_MOUSE] | 3.21  | 1  | 2 | 2  | 2   | 4.33 | 1.31 | 1.16  | -0.02 |
| Q3UR44   | Protein MRV1 (Fragment) OS=Mus musculus<br>GN=Mrv1 PE=2 SV=1 -<br>[Q3UR44_MOUSE]                                      | 5.87  | 4  | 2 | 3  | 5   | 1.28 | 1.30 | 0.18  | 0.21  |
| Q99NF1   | Beta,beta-carotene 9',10'-oxygenase<br>OS=Mus musculus<br>GN=Bco2 PE=1 SV=1 -<br>[BCDO2_MOUSE]                        | 8.27  | 1  | 2 | 2  | 2   | 0.96 | 1.29 | -0.40 | 0.18  |
| Q8K157   | Aldose 1-epimerase<br>OS=Mus musculus<br>GN=Galm PE=2 SV=1 -<br>[GALM_MOUSE]                                          | 7.31  | 1  | 2 | 2  | 8   | 2.06 | 1.27 | 0.32  | 0.24  |
| P08905   | Lysozyme C-2 OS=Mus musculus<br>GN=Lyz2 PE=1 SV=2 -<br>[LYZ2_MOUSE]                                                   | 14.86 | 2  | 2 | 2  | 3   | 1.49 | 1.25 | -0.14 | 0.37  |
| Q6IQY5-2 | Isoform 2 of Centrosomal protein of 70 kDa OS=Mus musculus<br>GN=Cep70 -<br>[CEP70_MOUSE]                             | 3.98  | 2  | 2 | 2  | 2   | 0.95 | 1.20 | -0.96 | 0.65  |
| Q4VBE4-2 | Isoform 2 of Pikachurin OS=Mus musculus<br>GN=Egflam -<br>[EGFLA_MOUSE]                                               | 2.78  | 2  | 2 | 2  | 2   | 1.58 | 1.16 | -0.35 | 0.28  |
| M0QWQ7   | Semaphorin-3B OS=Mus musculus<br>GN=Sema3b PE=4 SV=1 -<br>[M0QWQ7_MOUSE]                                              | 8.05  | 3  | 2 | 2  | 4   | 2.31 | 1.14 | -0.78 | -0.25 |
| Q5UAK0-5 | Isoform 5 of Mesoderm induction early response protein 1 OS=Mus musculus<br>GN=Mier1 -<br>[MIER1_MOUSE]               | 10.00 | 5  | 2 | 3  | 9   | 2.23 | 1.14 | 0.38  | 0.74  |

|          |                                                                                                                |       |    |   |    |     |      |      |       |       |
|----------|----------------------------------------------------------------------------------------------------------------|-------|----|---|----|-----|------|------|-------|-------|
| Q3TG86   | Cytochrome P450, family 11, subfamily b, polypeptide 1 OS=Mus musculus GN=Cyp11b1 PE=2 SV=1 - [Q3TG86_MOUSE]   | 9.38  | 1  | 2 | 2  | 2   | 3.60 | 1.11 | 0.69  | 0.30  |
| E9PZ67   | Calsequestrin (Fragment) OS=Mus musculus GN=Casq2 PE=2 SV=1 - [E9PZ67_MOUSE]                                   | 8.65  | 3  | 2 | 2  | 3   | 2.44 | 1.11 | 0.50  | -0.59 |
| E9Q0N0   | Intersectin-1 OS=Mus musculus GN=Itsn1 PE=2 SV=1 - [E9Q0N0_MOUSE]                                              | 38.86 | 13 | 2 | 63 | 237 | 2.39 | 1.10 | -0.01 | -0.25 |
| P09026   | Homeobox protein Hox-B3 OS=Mus musculus GN=Hoxb3 PE=2 SV=4 - [HXB3_MOUSE]                                      | 4.16  | 2  | 2 | 2  | 2   | 2.40 | 1.10 | 0.73  | 0.44  |
| R4GML6   | Centriolin (Fragment) OS=Mus musculus GN=Cep110 PE=4 SV=1 - [R4GML6_MOUSE]                                     | 1.47  | 15 | 2 | 5  | 6   | 1.21 | 1.07 | 0.19  | -0.35 |
| E9QNK8   | Kv channel-interacting protein 2 OS=Mus musculus GN=Kcni2 PE=2 SV=1 - [E9QNK8_MOUSE]                           | 27.78 | 11 | 2 | 5  | 13  | 0.93 | 1.07 | 0.62  | -0.32 |
| P27005   | Protein S100-A8 OS=Mus musculus GN=S100a8 PE=1 SV=3 - [S10A8_MOUSE]                                            | 46.07 | 1  | 2 | 2  | 4   | 1.89 | 1.06 | 0.75  | 1.14  |
| Q6A044-2 | Isoform 2 of Protein FAM189A1 OS=Mus musculus GN=Fam189a1 - [F1891_MOUSE]                                      | 20.86 | 2  | 2 | 2  | 3   | 1.19 | 1.03 | 1.57  | 0.83  |
| Q4LDF6   | Protein Cfr2 (Precursor) OS=Mus musculus GN=Cfr2 PE=2 SV=1 - [Q4LDF6_MOUSE]                                    | 19.28 | 1  | 2 | 5  | 18  | 1.40 | 1.01 | -0.48 | -0.14 |
| A2AKN9   | Major urinary protein 2 OS=Mus musculus GN=Mup2 PE=2 SV=1 - [A2AKN9_MOUSE]                                     | 53.89 | 8  | 2 | 8  | 26  | 1.85 | 1.00 | 1.78  | 2.44  |
| P06683   | Complement component C9 OS=Mus musculus GN=C9 PE=1 SV=2 - [CO9_MOUSE]                                          | 3.65  | 2  | 2 | 2  | 6   | 1.74 | 0.98 | 0.72  | 1.12  |
| P49182   | Heparin cofactor 2 OS=Mus musculus GN=Serpind1 PE=1 SV=1 - [HEP2_MOUSE]                                        | 4.18  | 1  | 2 | 2  | 5   | 1.15 | 0.95 | -0.91 | -0.43 |
| E5FYH1   | Testis- and ovary-specific PAZ domain-containing protein 1 OS=Mus musculus GN=Topaz1 PE=2 SV=1 - [TOPZ1_MOUSE] | 1.57  | 1  | 2 | 2  | 2   | 2.37 | 0.95 | 0.97  | 0.42  |
| Q0VGM9-4 | Isoform 4 of Regulator of telomere elongation helicase 1 OS=Mus musculus GN=Rtel1 - [RTEL1_MOUSE]              | 2.13  | 5  | 2 | 2  | 2   | 1.31 | 0.94 | 0.61  | 0.28  |
| P35276   | Ras-related protein Rab-3D OS=Mus musculus GN=Rab3d PE=1 SV=1 - [RAB3D_MOUSE]                                  | 47.03 | 4  | 2 | 10 | 125 | 1.45 | 0.93 | 0.11  | -0.28 |

|          |                                                                                                                   |       |   |   |     |     |      |      |       |       |
|----------|-------------------------------------------------------------------------------------------------------------------|-------|---|---|-----|-----|------|------|-------|-------|
| F7AGB5   | Methyltransferase-like protein 17, mitochondrial (Fragment) OS=Mus musculus GN=Mettl17 PE=2 SV=1 - [F7AGB5_MOUSE] | 6.07  | 4 | 2 | 2   | 2   | 2.99 | 0.92 | -0.45 | 0.01  |
| Q63870   | Collagen alpha-1(VII) chain OS=Mus musculus GN=Col7a1 PE=2 SV=3 - [CO7A1_MOUSE]                                   | 0.78  | 1 | 2 | 2   | 3   | 2.51 | 0.92 | 0.54  | 0.19  |
| E9PV60   | Protein Wdfy4 OS=Mus musculus GN=Wdfy4 PE=2 SV=1 - [E9PV60_MOUSE]                                                 | 1.36  | 2 | 2 | 4   | 4   | 0.92 | 0.90 | 0.71  | -0.40 |
| Q00519   | Xanthine dehydrogenase/oxidase OS=Mus musculus GN=Xdh PE=1 SV=5 - [XDH_MOUSE]                                     | 2.70  | 2 | 2 | 4   | 10  | 1.01 | 0.90 | 0.65  | 0.61  |
| Q8BVL9   | Janus kinase and microtubule-interacting protein 1 OS=Mus musculus GN=Jakmip1 PE=1 SV=2 - [JKIP1_MOUSE]           | 34.82 | 5 | 2 | 21  | 77  | 1.18 | 0.90 | 1.02  | 0.52  |
| P15508   | Spectrin beta chain, erythrocytic OS=Mus musculus GN=Sptb PE=1 SV=4 - [SPTB1_MOUSE]                               | 55.69 | 1 | 2 | 103 | 407 | 1.04 | 0.89 | 0.09  | 0.29  |
| P12246   | Serum amyloid P-component OS=Mus musculus GN=Apcs PE=1 SV=2 - [SAMP_MOUSE]                                        | 13.39 | 1 | 2 | 2   | 10  | 0.93 | 0.86 | 0.46  | 1.88  |
| E9PY03   | Protein Tstd1 OS=Mus musculus GN=Tstd1 PE=4 SV=1 - [E9PY03_MOUSE]                                                 | 35.34 | 1 | 2 | 2   | 6   | 2.57 | 0.86 | 0.14  | 1.73  |
| O88327   | Alpha-catulin OS=Mus musculus GN=Ctnnal1 PE=2 SV=1 - [CTNL1_MOUSE]                                                | 2.46  | 1 | 2 | 2   | 2   | 1.30 | 0.86 | 0.17  | 0.03  |
| Q9CPW9-2 | Isoform 2 of Methionine aminopeptidase 1D, mitochondrial OS=Mus musculus GN=Metap1d - [MAP12_MOUSE]               | 10.14 | 2 | 2 | 2   | 3   | 0.90 | 0.85 | -0.85 | 0.25  |
| P58660   | Caspase recruitment domain-containing protein 10 OS=Mus musculus GN=Card10 PE=2 SV=1 - [CAR10_MOUSE]              | 4.31  | 2 | 2 | 4   | 6   | 4.75 | 0.82 | 0.99  | 0.91  |
| Q8BLI4   | Dermatan-sulfate epimerase OS=Mus musculus GN=Dse PE=2 SV=1 - [DSE_MOUSE]                                         | 1.46  | 1 | 2 | 2   | 2   | 1.84 | 0.80 | -0.19 | 0.15  |
| Q9QX66-3 | Isoform 3 of Zinc finger protein neuro-d4 OS=Mus musculus GN=Dpf1 - [DPF1_MOUSE]                                  | 8.73  | 6 | 2 | 2   | 2   | 1.51 | 0.77 | -0.88 | 0.12  |
| Q29SA9   | Peripheral clock protein 1 OS=Mus musculus GN=Nckap5 PE=2 SV=1 - [Q29SA9_MOUSE]                                   | 1.74  | 6 | 2 | 2   | 2   | 0.87 | 0.77 | 0.19  | 0.27  |



|          |                                                                                                              |       |   |   |    |     |      |      |      |       |
|----------|--------------------------------------------------------------------------------------------------------------|-------|---|---|----|-----|------|------|------|-------|
| D6RH86   | Ribosomal protein S6 kinase beta-2 OS=Mus musculus GN=Rps6kb2 PE=2 SV=1 - [D6RH86_MOUSE]                     | 14.74 | 5 | 2 | 3  | 6   | 1.35 | 0.77 | 0.42 | -0.17 |
| Q8K1S6-2 | Isoform 2 of Protein spire homolog 2 OS=Mus musculus GN=Spire2 - [SPIR2_MOUSE]                               | 4.69  | 3 | 2 | 3  | 9   | 1.67 | 0.75 | 0.66 | 0.33  |
| E9PX95   | Protein Abca17 OS=Mus musculus GN=Abca17 PE=3 SV=1 - [E9PX95_MOUSE]                                          | 2.31  | 1 | 2 | 3  | 4   | 1.14 | 0.74 | 0.23 | -0.08 |
| Q9WTK5   | Nuclear factor NF-kappa-B p100 subunit OS=Mus musculus GN=Nfkb2 PE=1 SV=1 - [NFKB2_MOUSE]                    | 3.56  | 1 | 2 | 2  | 4   | 1.91 | 0.74 | 0.67 | 0.14  |
| J3QNA8   | Protein Rnpepl1 (Fragment) OS=Mus musculus GN=Rnpepl1 PE=4 SV=1 - [J3QNA8_MOUSE]                             | 10.53 | 3 | 2 | 2  | 3   | 4.16 | 0.74 | 0.08 | -0.46 |
| Q4KMS1   | Tripartite motif-containing 44 OS=Mus musculus GN=Trim44 PE=2 SV=1 - [Q4KMS1_MOUSE]                          | 12.75 | 3 | 2 | 2  | 4   | 0.99 | 0.73 | 0.71 | 0.48  |
| Q9QZ82   | Cholesterol side-chain cleavage enzyme, mitochondrial OS=Mus musculus GN=Cyp11a1 PE=2 SV=1 - [CP11A_MOUSE]   | 3.99  | 1 | 2 | 2  | 2   | 1.64 | 0.73 | 0.08 | -0.26 |
| Q60750   | Ephrin type-A receptor 1 OS=Mus musculus GN=Epha1 PE=1 SV=2 - [EPHA1_MOUSE]                                  | 1.74  | 1 | 2 | 2  | 3   | 1.85 | 0.72 | 0.45 | -0.39 |
| P39447   | Tight junction protein ZO-1 OS=Mus musculus GN=Tjp1 PE=1 SV=2 - [ZO1_MOUSE]                                  | 31.75 | 1 | 2 | 43 | 186 | 1.38 | 0.71 | 0.20 | -0.04 |
| Q61133   | Glutathione S-transferase theta-2 OS=Mus musculus GN=Gstt2 PE=2 SV=4 - [GSTT2_MOUSE]                         | 13.11 | 1 | 2 | 3  | 10  | 1.10 | 0.71 | 0.02 | 0.41  |
| B7ZC21   | cAMP-dependent protein kinase inhibitor gamma (Fragment) OS=Mus musculus GN=Pkiig PE=2 SV=1 - [B7ZC21_MOUSE] | 30.36 | 3 | 2 | 2  | 6   | 0.96 | 0.71 | 1.01 | 0.06  |
| E9Q0F0   | Protein Krt78 OS=Mus musculus GN=Krt78 PE=2 SV=1 - [E9Q0F0_MOUSE]                                            | 3.37  | 2 | 2 | 4  | 19  | 1.49 | 0.70 | 0.58 | -0.14 |
| Q9DBX1   | Regulator of cell cycle RGCC OS=Mus musculus GN=Rgcc PE=1 SV=1 - [RGCC_MOUSE]                                | 21.90 | 1 | 2 | 2  | 10  | 1.33 | 0.69 | 0.45 | -0.42 |
| Q8K1N4   | Spermatogenesis-associated serine-rich protein 2 OS=Mus musculus GN=Spats2 PE=1 SV=1 - [SPAS2_MOUSE]         | 4.04  | 2 | 2 | 2  | 2   | 1.48 | 0.66 | 0.14 | 0.49  |

|          |                                                                                                                           |      |   |   |   |   |      |      |       |       |
|----------|---------------------------------------------------------------------------------------------------------------------------|------|---|---|---|---|------|------|-------|-------|
| D3YUR7   | Lipoxygenase homology domain-containing protein 1 (Fragment)<br>OS=Mus musculus<br>GN=Loxhd1 PE=2 SV=1<br>-[D3YUR7_MOUSE] | 1.76 | 4 | 2 | 2 | 2 | 1.91 | 0.66 | 0.30  | 0.12  |
| E9Q605   | Inhibitor of nuclear factor kappa-B kinase subunit alpha<br>OS=Mus musculus<br>GN=Chuk PE=2 SV=1<br>-[E9Q605_MOUSE]       | 3.06 | 4 | 2 | 2 | 2 | 1.18 | 0.65 | 0.08  | 0.04  |
| Q8CFB8   | NAD+ ADP-ribosyltransferase 3<br>PARP-3<br>OS=Mus musculus<br>GN=Parp3 PE=2 SV=1<br>-[Q8CFB8_MOUSE]                       | 4.17 | 4 | 2 | 2 | 5 | 1.19 | 0.63 | -0.17 | -0.35 |
| Q9D842-2 | Isoform 2 of Aprataxin and PNK-like factor<br>OS=Mus musculus<br>GN=Ap1f<br>-[APLF_MOUSE]                                 | 7.42 | 3 | 2 | 2 | 4 | 4.02 | 0.63 | 0.21  | -0.14 |
| Q6NS45-3 | Isoform 3 of Coiled-coil domain-containing protein 66<br>OS=Mus musculus<br>GN=Ccdc66<br>-[CCD66_MOUSE]                   | 2.11 | 3 | 2 | 2 | 2 | 0.87 | 0.62 | -0.11 | 0.19  |
