# Supplementary material for: Hypothalamus proteomics from mouse models with obesity and anorexia reveals therapeutic targets of appetite regulation
Source: PubMed Central journal article supplement (PMC4855256; doi:10.1038/nutd.2016.10), 2016-04-25
Supplement: nutd201610x8.pdf [file nutd201610x8.pdf]

**Supplementary Table 5.** Differentially expressed proteins in the LPS groups compared to controls (proteins analysed with at least two unique peptides)

| Accession | Description                                                                                                  | ΣCoverage | Σ# Proteins | Σ# Unique Peptides | Σ# Peptides | Σ# PSMs | HFD1/C1 | HFD2/C1 | LPS1/C2 | LPS2/C2 |
|-----------|--------------------------------------------------------------------------------------------------------------|-----------|-------------|--------------------|-------------|---------|---------|---------|---------|---------|
| Q99PL5    | Ribosome-binding protein 1 OS=Mus musculus GN=Rrbp1 PE=2 SV=2 - [RRBP1_MOUSE]                                | 54.39     | 12          | 57                 | 69          | 298     | 0.35    | -1.06   | -0.58   | -0.90   |
| P07724    | Serum albumin OS=Mus musculus GN=Alb PE=1 SV=3 - [ALBU_MOUSE]                                                | 75.49     | 4           | 49                 | 49          | 2294    | 1.97    | 0.72    | -1.29   | -0.51   |
| Q80YX1    | Tenascin OS=Mus musculus GN=Tnc PE=1 SV=1 - [TENA_MOUSE]                                                     | 26.73     | 6           | 45                 | 45          | 127     | -0.37   | -0.31   | -0.51   | -0.99   |
| Q9EQF6    | Dihydropyrimidinase-related protein 5 OS=Mus musculus GN=Dpysl5 PE=1 SV=1 - [DPYL5_MOUSE]                    | 71.10     | 2           | 36                 | 36          | 334     | -0.55   | -1.20   | -0.97   | -0.68   |
| Q8C196    | Carbamoyl-phosphate synthase [ammonia], mitochondrial OS=Mus musculus GN=Cps1 PE=1 SV=2 - [CPSM_MOUSE]       | 28.73     | 1           | 36                 | 39          | 110     | 0.54    | 0.10    | 1.86    | 2.53    |
| Q5SYD0    | Unconventional myosin-IId OS=Mus musculus GN=Myc1d PE=1 SV=1 - [MYO1D_MOUSE]                                 | 41.35     | 2           | 36                 | 39          | 117     | -0.16   | -1.24   | 0.61    | 0.89    |
| Q9ESZ8-5  | Isoform 5 of General transcription factor II-I OS=Mus musculus GN=Gtf2i - [GTF2I_MOUSE]                      | 41.96     | 13          | 31                 | 32          | 75      | -0.43   | -0.11   | -0.55   | -0.48   |
| P48660    | Alpha-intermexin OS=Mus musculus GN=Ina PE=1 SV=2 - [AINX_MOUSE]                                             | 67.06     | 1           | 31                 | 35          | 1067    | 0.75    | -1.41   | 0.84    | 0.64    |
| Q61941    | NAD(P) transhydrogenase, mitochondrial OS=Mus musculus GN=Nnt PE=1 SV=2 - [NNTM_MOUSE]                       | 25.41     | 4           | 28                 | 28          | 107     | -0.75   | 0.12    | -1.61   | -1.83   |
| Q8BMK4    | Cytoskeleton-associated protein 4 OS=Mus musculus GN=Ckap4 PE=2 SV=2 - [CKAP4_MOUSE]                         | 55.30     | 6           | 28                 | 29          | 164     | 0.07    | -0.10   | -0.57   | -0.75   |
| E9PWE8    | Dihydropyrimidinase-related protein 3 OS=Mus musculus GN=Dpysl3 PE=2 SV=1 - [E9PWE8_MOUSE]                   | 61.49     | 5           | 27                 | 33          | 852     | 0.06    | -0.82   | -0.89   | -0.81   |
| P13020-2  | Isoform 2 of Gelsolin OS=Mus musculus GN=Gsn - [GELS_MOUSE]                                                  | 49.25     | 3           | 27                 | 28          | 146     | 0.78    | -1.10   | -0.54   | -0.46   |
| P21619    | Lamin-B2 OS=Mus musculus GN=Lmb2 PE=1 SV=2 - [LMNB2_MOUSE]                                                   | 55.20     | 2           | 26                 | 31          | 185     | 0.38    | 0.37    | 0.57    | 0.47    |
| Q61102    | ATP-binding cassette sub-family B member 7, mitochondrial OS=Mus musculus GN=Abcb7 PE=1 SV=3 - [ABCB7_MOUSE] | 37.63     | 1           | 23                 | 24          | 75      | -0.30   | 0.27    | 0.54    | 0.66    |
| Q9JIA1    | Leucine-rich glioma-inactivated protein 1 OS=Mus musculus GN=Lgi1 PE=1 SV=1 - [LG1_MOUSE]                    | 40.04     | 2           | 23                 | 23          | 136     | -0.70   | 0.43    | 0.51    | 0.46    |
| Q3UX37    | Protein Plekhhg1 OS=Mus musculus GN=Plekhhg1 PE=2 SV=1 - [Q3UX37_MOUSE]                                      | 18.27     | 4           | 22                 | 23          | 52      | -0.79   | -1.44   | -0.68   | -0.61   |

|        |                                                                                                                    |       |   |    |    |     |       |       |       |       |
|--------|--------------------------------------------------------------------------------------------------------------------|-------|---|----|----|-----|-------|-------|-------|-------|
| Q99K47 | Fibrinogen, alpha polypeptide OS=Mus musculus GN=Fga PE=2 SV=1 - [Q99K47_MOUSE]                                    | 49.55 | 2 | 22 | 23 | 134 | 0.92  | 0.76  | 0.56  | 1.56  |
| Q9ET01 | Glycogen phosphorylase, liver form OS=Mus musculus GN=Pygl PE=1 SV=4 - [PYGL_MOUSE]                                | 39.88 | 2 | 22 | 32 | 114 | -0.29 | 1.01  | 0.53  | 1.15  |
| Q80U19 | Dishevelled-associated activator of morphogenesis 2 OS=Mus musculus GN=Daam2 PE=2 SV=4 - [DAAM2_MOUSE]             | 24.48 | 4 | 22 | 26 | 69  | -0.01 | -0.44 | 0.91  | 0.85  |
| Q6XE40 | MAGUK p55 subfamily member 3 OS=Mus musculus GN=Mpp3 PE=2 SV=1 - [Q6XE40_MOUSE]                                    | 46.15 | 3 | 22 | 23 | 84  | -0.33 | 0.51  | 0.78  | 0.52  |
| E9PV14 | Band 4.1-like protein 1 (Fragment) OS=Mus musculus GN=Epb4.111 PE=2 SV=1 - [E9PV14_MOUSE]                          | 52.07 | 1 | 22 | 44 | 254 | 1.18  | -0.80 | 0.63  | 0.45  |
| P28867 | Protein kinase C delta type OS=Mus musculus GN=Prkcd PE=1 SV=3 - [KPCD_MOUSE]                                      | 39.17 | 6 | 21 | 24 | 93  | -0.65 | -1.60 | -0.73 | -0.63 |
| Q62351 | Transferrin receptor protein 1 OS=Mus musculus GN=Tfrc PE=1 SV=1 - [TFR1_MOUSE]                                    | 27.52 | 2 | 21 | 21 | 55  | -0.22 | -0.71 | -0.60 | -0.49 |
| Q61282 | Aggrecan core protein OS=Mus musculus GN=Acan PE=1 SV=2 - [PGCA_MOUSE]                                             | 13.56 | 1 | 21 | 22 | 73  | 1.89  | 0.67  | 1.12  | 0.72  |
| P16014 | Secretogranin-1 OS=Mus musculus GN=Chgb PE=1 SV=2 - [SCG1_MOUSE]                                                   | 31.31 | 1 | 20 | 20 | 99  | 0.19  | -0.31 | -0.95 | -1.49 |
| Q9D0K2 | Succinyl-CoA:3-ketoacid coenzyme A transferase 1, mitochondrial OS=Mus musculus GN=Dxct1 PE=1 SV=1 - [SCOT1_MOUSE] | 54.23 | 2 | 20 | 20 | 259 | -0.32 | -0.57 | -0.58 | -0.71 |
| P02469 | Laminin subunit beta-1 OS=Mus musculus GN=Lamb1 PE=1 SV=3 - [LAMB1_MOUSE]                                          | 13.10 | 3 | 19 | 21 | 46  | 0.13  | -0.72 | -1.05 | -0.98 |
| Q8R151 | NFX1-type zinc finger-containing protein 1 OS=Mus musculus GN=Znfx1 PE=2 SV=3 - [ZNF1_MOUSE]                       | 11.05 | 4 | 19 | 21 | 40  | -0.02 | 0.40  | 0.56  | 0.57  |
| Q8BNW9 | Kelch repeat and BTB domain-containing protein 11 OS=Mus musculus GN=Kbtbd11 PE=1 SV=3 - [KBTBB_MOUSE]             | 45.66 | 1 | 19 | 19 | 99  | -0.41 | 0.65  | 0.55  | 0.54  |
| Q08642 | Protein-arginine deiminase type-2 OS=Mus musculus GN=Padl2 PE=1 SV=2 - [PAD12_MOUSE]                               | 31.20 | 1 | 18 | 18 | 64  | 0.04  | -1.17 | 0.76  | 1.04  |
| Q63912 | Oligodendrocyte-myelin glycoprotein OS=Mus musculus GN=Omg PE=1 SV=1 - [OMGP_MOUSE]                                | 32.73 | 2 | 17 | 17 | 225 | 0.39  | 0.41  | 0.60  | 0.46  |
| P06880 | Somatotropin OS=Mus musculus GN=Gh1 PE=2 SV=1 - [SOMA_MOUSE]                                                       | 65.74 | 1 | 16 | 17 | 303 | -0.93 | -1.18 | -1.87 | -1.83 |
| Q8K298 | Actin-binding protein anillin OS=Mus musculus GN=Anln PE=1 SV=2 - [ANLN_MOUSE]                                     | 14.72 | 1 | 16 | 16 | 52  | 0.77  | -1.40 | 0.86  | 0.48  |

|        |                                                                                                            |       |   |    |    |     |       |       |       |       |
|--------|------------------------------------------------------------------------------------------------------------|-------|---|----|----|-----|-------|-------|-------|-------|
| Q64676 | 2-hydroxyacylsphingosine 1-beta-galactosyltransferase OS=Mus musculus GN=Ugt8 PE=2 SV=2 - [CGT_MOUSE]      | 24.77 | 1 | 15 | 15 | 37  | -0.18 | -2.93 | -1.78 | -1.39 |
| P19324 | Serpin H1 OS=Mus musculus GN=Serpinh1 PE=1 SV=3 - [SERPH_MOUSE]                                            | 37.65 | 1 | 15 | 15 | 45  | -0.54 | -0.34 | -1.47 | -1.09 |
| D326B9 | Mitochondrial 10-formyltetrahydrofolate dehydrogenase OS=Mus musculus GN=Aldh12 PE=2 SV=1 - [D326B9_MOUSE] | 32.35 | 2 | 15 | 23 | 73  | -0.18 | -1.20 | -1.39 | -0.95 |
| Q80XN0 | D-beta-hydroxybutyrate dehydrogenase, mitochondrial OS=Mus musculus GN=Bdh1 PE=1 SV=2 - [BDH_MOUSE]        | 55.10 | 2 | 15 | 17 | 189 | -0.73 | -0.91 | -0.65 | -0.68 |
| P09242 | Alkaline phosphatase, tissue-nonspecific isozyme OS=Mus musculus GN=Alpl PE=1 SV=2 - [PPBT_MOUSE]          | 34.92 | 4 | 15 | 15 | 43  | -0.10 | 0.09  | -1.00 | -0.53 |
| Q88492 | Perilipin-4 OS=Mus musculus GN=Plin4 PE=1 SV=2 - [PLIN4_MOUSE]                                             | 32.15 | 2 | 15 | 15 | 36  | 0.14  | 0.61  | 1.22  | 0.94  |
| P24529 | Tyrosine 3-monooxygenase OS=Mus musculus GN=Th PE=1 SV=3 - [TY3H_MOUSE]                                    | 39.96 | 5 | 15 | 15 | 55  | -1.06 | -1.38 | 1.26  | 0.89  |
| P34914 | Bifunctional epoxide hydrolase 2 OS=Mus musculus GN=Ephx2 PE=1 SV=2 - [HYES_MOUSE]                         | 38.27 | 2 | 15 | 15 | 47  | -0.04 | 0.79  | 0.77  | 0.65  |
| Q07076 | Annexin A7 OS=Mus musculus GN=Anxa7 PE=2 SV=2 - [ANXA7_MOUSE]                                              | 32.83 | 1 | 15 | 15 | 104 | -0.21 | 1.31  | 0.56  | 0.63  |
| Q8JZK9 | Hydroxymethylglutaryl-CoA synthase, cytoplasmic OS=Mus musculus GN=Hmgcs1 PE=1 SV=1 - [HMCS1_MOUSE]        | 28.46 | 1 | 14 | 15 | 60  | -0.08 | -1.41 | -0.95 | -0.72 |
| P36552 | Coproporphyrinogen-III oxidase, mitochondrial OS=Mus musculus GN=Cpox PE=1 SV=2 - [HEM6_MOUSE]             | 39.73 | 1 | 14 | 14 | 66  | 1.16  | -0.68 | -0.80 | -0.59 |
| P51655 | Glypican-4 OS=Mus musculus GN=Gpc4 PE=2 SV=2 - [GPC4_MOUSE]                                                | 34.65 | 1 | 14 | 16 | 43  | -0.81 | 1.50  | -0.50 | -0.59 |
| Q8CCK0 | Core histone macro-H2A.2 OS=Mus musculus GN=H2afy2 PE=1 SV=3 - [H2AW_MOUSE]                                | 48.92 | 1 | 14 | 16 | 92  | -0.89 | -0.45 | -0.67 | -0.47 |
| P00920 | Carbonic anhydrase 2 OS=Mus musculus GN=Ca2 PE=1 SV=4 - [CAH2_MOUSE]                                       | 65.38 | 1 | 14 | 14 | 421 | 0.36  | 0.30  | 0.63  | 1.05  |
| Q3V0K9 | Plastin-1 OS=Mus musculus GN=Pls1 PE=2 SV=1 - [PLS1_MOUSE]                                                 | 34.13 | 2 | 14 | 17 | 53  | 0.47  | -0.88 | 0.63  | 0.77  |
| P54830 | Tyrosine-protein phosphatase non-receptor type 5 OS=Mus musculus GN=Ptpn5 PE=2 SV=2 - [PTN5_MOUSE]         | 32.90 | 4 | 14 | 14 | 47  | -0.34 | 0.32  | 0.93  | 0.47  |
| P01193 | Pro-opiomelanocortin OS=Mus musculus GN=Pomc PE=2 SV=1 - [COL1_MOUSE]                                      | 53.62 | 1 | 13 | 13 | 150 | -0.51 | -0.86 | -3.43 | -3.22 |

|          |                                                                                                         |       |   |    |    |      |       |       |       |       |
|----------|---------------------------------------------------------------------------------------------------------|-------|---|----|----|------|-------|-------|-------|-------|
| A2AQ53   | Fibrillin-1 OS=Mus musculus GN=Fbn1 PE=4 SV=1 - [A2AQ53_MOUSE]                                          | 5.01  | 2 | 13 | 16 | 27   | -0.32 | 1.96  | -0.95 | -0.59 |
| P63325   | 40S ribosomal protein S10 OS=Mus musculus GN=Rps10 PE=1 SV=1 - [RS10_MOUSE]                             | 60.00 | 3 | 13 | 13 | 78   | -0.20 | -0.50 | -0.53 | -0.47 |
| Q9D154   | Leukocyte elastase inhibitor A OS=Mus musculus GN=Serpnb1a PE=1 SV=1 - [ILEUA_MOUSE]                    | 48.02 | 5 | 13 | 18 | 92   | 0.79  | -0.17 | 1.58  | 1.98  |
| Q99K67   | Alpha-aminoadipic semialdehyde synthase, mitochondrial OS=Mus musculus GN=Aass PE=2 SV=1 - [AASS_MOUSE] | 17.93 | 2 | 13 | 13 | 24   | 0.01  | 0.85  | 0.86  | 1.08  |
| Q9QUP5   | Hyaluronan and proteoglycan link protein 1 OS=Mus musculus GN=Hapln1 PE=2 SV=1 - [HPLN1_MOUSE]          | 47.47 | 1 | 13 | 14 | 82   | 0.63  | 0.90  | 1.19  | 0.50  |
| P47867-2 | Isoform 2 of Secretogranin-3 OS=Mus musculus GN=Scg3 - [SCG3_MOUSE]                                     | 35.62 | 2 | 12 | 12 | 57   | 0.77  | -0.27 | -0.51 | -0.68 |
| Q61646   | Haptoglobin OS=Mus musculus GN=Hp PE=1 SV=1 - [HPT_MOUSE]                                               | 34.01 | 1 | 12 | 12 | 34   | 1.22  | 1.59  | 2.86  | 3.23  |
| Q91Y97   | Fructose-bisphosphate aldolase B OS=Mus musculus GN=Aldob PE=1 SV=3 - [ALDOB_MOUSE]                     | 36.54 | 1 | 12 | 13 | 87   | 0.88  | 0.11  | 2.43  | 2.94  |
| Q9R118   | Serine protease HTRA1 OS=Mus musculus GN=Htra1 PE=1 SV=2 - [HTRA1_MOUSE]                                | 37.50 | 1 | 12 | 12 | 34   | 0.55  | 0.24  | 1.26  | 1.25  |
| P60202   | Myelin proteolipid protein OS=Mus musculus GN=Plp1 PE=1 SV=2 - [MYPR_MOUSE]                             | 28.16 | 2 | 12 | 12 | 709  | -0.01 | -2.00 | 0.71  | 0.98  |
| Q3UHB8   | Coiled-coil domain-containing protein 177 OS=Mus musculus GN=Ccdc177 PE=1 SV=1 - [CC177_MOUSE]          | 23.09 | 1 | 12 | 12 | 27   | -0.07 | 0.41  | 0.96  | 0.70  |
| P68368   | Tubulin alpha-4A chain OS=Mus musculus GN=Tuba4a PE=1 SV=1 - [TBA4A_MOUSE]                              | 68.75 | 1 | 12 | 31 | 3452 | 0.00  | 0.69  | 0.51  | 0.55  |
| A6H630   | UPF0364 protein C6orf211 homolog OS=Mus musculus PE=2 SV=1 - [CFZ11_MOUSE]                              | 29.38 | 5 | 12 | 12 | 30   | -0.18 | 0.42  | 0.66  | 0.51  |
| Q7TQA1-5 | Isoform 5 of Immunoglobulin superfamily member 1 OS=Mus musculus GN=Igsf1 - [IGSF1_MOUSE]               | 12.52 | 4 | 11 | 11 | 50   | -0.20 | -1.00 | -1.19 | -0.45 |
| Q61176   | Arginase-1 OS=Mus musculus GN=Arg1 PE=1 SV=1 - [ARG1_MOUSE]                                             | 37.15 | 1 | 11 | 11 | 33   | 1.00  | 0.12  | 1.16  | 1.27  |
| Q9DB73   | NADH-cytochrome b5 reductase 1 OS=Mus musculus GN=Cyb5r1 PE=2 SV=1 - [NBSR1_MOUSE]                      | 34.43 | 5 | 11 | 11 | 37   | -0.27 | 0.96  | 0.71  | 1.08  |
| Q61885   | Myelin-oligodendrocyte glycoprotein OS=Mus musculus GN=Mog PE=1 SV=1 - [MOG_MOUSE]                      | 39.43 | 3 | 11 | 12 | 176  | 0.36  | -1.84 | 0.89  | 1.03  |

|        |                                                                                                                                |       |   |    |    |     |       |       |       |       |
|--------|--------------------------------------------------------------------------------------------------------------------------------|-------|---|----|----|-----|-------|-------|-------|-------|
| Q8BV14 | Dihydropteridine reductase OS=Mus musculus GN=Qdpr PE=1 SV=2 - [DHPR_MOUSE]                                                    | 61.83 | 4 | 11 | 11 | 106 | -0.14 | -0.40 | 0.52  | 1.00  |
| Q99L04 | Dehydrogenase/reductase SDR family member 1 OS=Mus musculus GN=Dhrs1 PE=2 SV=1 - [DHR1_MOUSE]                                  | 41.21 | 1 | 11 | 11 | 48  | -0.28 | 0.13  | 0.65  | 0.73  |
| P29699 | Alpha-2-HS-glycoprotein OS=Mus musculus GN=Ahsg PE=1 SV=1 - [FETUA_MOUSE]                                                      | 44.06 | 1 | 10 | 10 | 63  | 1.41  | 0.48  | -1.40 | -0.83 |
| F22469 | Matrilin-4 OS=Mus musculus GN=Matn4 PE=2 SV=1 - [F22469_MOUSE]                                                                 | 20.11 | 5 | 10 | 10 | 22  | -1.24 | -0.02 | -1.08 | -0.65 |
| P50429 | Arylsulfatase B OS=Mus musculus GN=Arsb PE=2 SV=3 - [ARSB_MOUSE]                                                               | 18.91 | 3 | 10 | 10 | 55  | 0.30  | -0.05 | -0.48 | -0.65 |
| P23953 | Carboxylesterase 1C OS=Mus musculus GN=Ces1c PE=1 SV=4 - [EST1C_MOUSE]                                                         | 40.79 | 2 | 10 | 16 | 65  | 1.52  | 0.23  | -1.55 | -0.58 |
| P13595 | Neural cell adhesion molecule 1 OS=Mus musculus GN=Ncam1 PE=1 SV=3 - [NCAM1_MOUSE]                                             | 42.42 | 4 | 10 | 42 | 842 | -0.39 | -0.91 | -0.57 | -0.54 |
| Q6PB93 | Polypeptide N-acetylgalactosaminyltransferase 2 OS=Mus musculus GN=Galt2 PE=2 SV=1 - [GALT2_MOUSE]                             | 23.51 | 2 | 10 | 10 | 24  | -0.39 | -0.33 | -0.71 | -0.51 |
| Q8C4C4 | Repulsive guidance molecule A OS=Mus musculus GN=Rgma PE=2 SV=1 - [Q8C4C4_MOUSE]                                               | 35.17 | 3 | 10 | 10 | 19  | -0.67 | -0.90 | -0.76 | -0.51 |
| P62830 | 60S ribosomal protein L23 OS=Mus musculus GN=Rpl23 PE=1 SV=1 - [RL23_MOUSE]                                                    | 71.43 | 2 | 10 | 10 | 36  | -1.08 | -0.79 | -0.63 | -0.50 |
| P46978 | Dolichyl-diphosphooligosaccharide-protein glycosyltransferase subunit STT3A OS=Mus musculus GN=Stt3a PE=1 SV=1 - [STT3A_MOUSE] | 14.04 | 2 | 10 | 12 | 32  | -0.55 | -0.23 | -0.64 | -0.46 |
| O35490 | Betaine-homocysteine S-methyltransferase 1 OS=Mus musculus GN=Bhmt PE=2 SV=1 - [BHMT1_MOUSE]                                   | 32.92 | 2 | 10 | 10 | 39  | 0.62  | 0.00  | 2.21  | 2.65  |
| P16015 | Carbonic anhydrase 3 OS=Mus musculus GN=Ca3 PE=1 SV=3 - [CAH3_MOUSE]                                                           | 48.08 | 1 | 10 | 10 | 35  | 1.44  | 1.49  | 1.20  | 2.08  |
| P84096 | Rho-related GTP-binding protein RhoG OS=Mus musculus GN=Rhog PE=2 SV=1 - [RHOG_MOUSE]                                          | 54.45 | 7 | 10 | 11 | 92  | -0.10 | -1.44 | 0.54  | 0.81  |
| Q8K3A0 | Iron-sulfur cluster chaperone protein HscB, mitochondrial OS=Mus musculus GN=Hscb PE=2 SV=2 - [HSC20_MOUSE]                    | 45.30 | 3 | 10 | 10 | 34  | 0.80  | 0.50  | 1.00  | 0.57  |
| P05622 | Platelet-derived growth factor receptor beta OS=Mus musculus GN=Pdgfrb PE=1 SV=1 - [PGRB_MOUSE]                                | 9.93  | 9 | 9  | 10 | 28  | 1.06  | -0.12 | -1.66 | -1.67 |
| P97792 | Coxsackievirus and adenovirus receptor homolog OS=Mus musculus GN=Cxadr PE=1 SV=1 - [CXAR_MOUSE]                               | 26.03 | 3 | 9  | 9  | 30  | -0.70 | -0.54 | -1.31 | -1.66 |

|          |                                                                                                                       |       |   |   |    |      |       |       |       |       |
|----------|-----------------------------------------------------------------------------------------------------------------------|-------|---|---|----|------|-------|-------|-------|-------|
| Q8R4E6   | Purine-rich element-binding protein gamma<br>OS=Mus musculus<br>GN=Purg PE=1 SV=1 -<br>[PURG_MOUSE]                   | 27.71 | 2 | 9 | 13 | 33   | -1.18 | -1.55 | -0.77 | -1.04 |
| B1AU75   | Nuclear autoantigenic sperm protein OS=Mus musculus GN=Nasp<br>PE=4 SV=1 -<br>[B1AU75_MOUSE]                          | 16.56 | 4 | 9 | 10 | 21   | 0.96  | -0.50 | -0.50 | -0.98 |
| Q9QYS9-4 | Isoform 4 of Protein quaking OS=Mus musculus GN=Qki -<br>[QKI_MOUSE]                                                  | 32.92 | 8 | 9 | 10 | 52   | 0.38  | -1.25 | -0.65 | -0.73 |
| P62071   | Ras-related protein R-Ras2 OS=Mus musculus<br>GN=Rras2 PE=1 SV=1 -<br>[RRAS2_MOUSE]                                   | 60.78 | 1 | 9 | 12 | 74   | -0.16 | -1.18 | -0.58 | -0.60 |
| D3Z598   | Latent-transforming growth factor beta-binding protein 4<br>OS=Mus musculus<br>GN=Ltbp4 PE=2 SV=1 -<br>[D3Z598_MOUSE] | 7.45  | 7 | 9 | 9  | 19   | -0.30 | 0.40  | -0.50 | -0.59 |
| P62301   | 40S ribosomal protein S13 OS=Mus musculus<br>GN=Rps13 PE=1 SV=2 -<br>[RS13_MOUSE]                                     | 47.68 | 1 | 9 | 9  | 43   | -0.92 | -0.51 | -0.47 | -0.50 |
| Q8CIM8   | Integrator complex subunit 4 OS=Mus musculus GN=Ints4<br>PE=2 SV=1 -<br>[INT4_MOUSE]                                  | 14.52 | 3 | 9 | 9  | 21   | -0.08 | 0.24  | -0.60 | -0.49 |
| Q91XD7   | Cysteine-rich with EGF-like domain protein 1<br>OS=Mus musculus<br>GN=Crel1 PE=2 SV=1 -<br>[CREL1_MOUSE]              | 20.95 | 1 | 9 | 9  | 30   | -0.41 | -0.36 | -0.54 | -0.48 |
| O89020   | Afamin OS=Mus musculus GN=Atm PE=1<br>SV=2 - [AFAM_MOUSE]                                                             | 16.78 | 3 | 9 | 9  | 18   | 1.65  | 0.63  | -1.78 | -0.45 |
| Q8BH24   | Transmembrane 9 superfamily member 4<br>OS=Mus musculus<br>GN=Tm9sf4 PE=2 SV=1 -<br>[TM9S4_MOUSE]                     | 15.86 | 1 | 9 | 9  | 27   | -0.52 | -0.49 | -0.74 | -0.45 |
| P23927   | Alpha-crystallin B chain<br>OS=Mus musculus<br>GN=Cryab PE=1 SV=2 -<br>[CRYAB_MOUSE]                                  | 57.14 | 1 | 9 | 9  | 48   | 1.00  | -0.23 | 2.28  | 2.22  |
| H3BJ97   | Tubulointerstitial nephritis antigen-like OS=Mus musculus GN=Tinagl1<br>PE=2 SV=1 -<br>[H3BJ97_MOUSE]                 | 28.97 | 3 | 9 | 9  | 29   | 0.18  | 2.08  | 1.02  | 1.36  |
| Q8QZR5   | Alanine aminotransferase 1 OS=Mus musculus<br>GN=Gpt PE=2 SV=3 -<br>[ALAT1_MOUSE]                                     | 24.19 | 1 | 9 | 10 | 23   | 1.27  | 0.18  | 0.68  | 0.91  |
| P52760   | Ribonuclease UK114<br>OS=Mus musculus<br>GN=Hrsp12 PE=1 SV=3 -<br>[UK114_MOUSE]                                       | 92.59 | 1 | 9 | 11 | 87   | 1.19  | 0.70  | 1.10  | 0.78  |
| Q9D6F9   | Tubulin beta-4A chain<br>OS=Mus musculus<br>GN=Tubb4a PE=1 SV=3 -<br>[TBB4A_MOUSE]                                    | 84.01 | 1 | 9 | 31 | 3928 | -0.06 | 0.21  | 0.59  | 0.59  |
| A2AFS3   | UPF0577 protein KIAA1324 OS=Mus musculus GN=Kiaa1324<br>PE=2 SV=1 -<br>[K1324_MOUSE]                                  | 9.91  | 3 | 8 | 8  | 19   | -0.12 | -0.10 | -0.94 | -0.90 |
| E9Q7T7   | Protein Chadl OS=Mus musculus GN=Chadl<br>PE=2 SV=1 -<br>[E9Q7T7_MOUSE]                                               | 10.43 | 3 | 8 | 8  | 14   | -0.47 | -0.79 | -0.86 | -0.80 |

|        |                                                                                                                |       |   |   |    |     |       |       |       |       |
|--------|----------------------------------------------------------------------------------------------------------------|-------|---|---|----|-----|-------|-------|-------|-------|
| Q8BHC4 | Dephospho-CoA kinase domain-containing protein OS=Mus musculus GN=Dcakd PE=2 SV=1 - [DCAKD_MOUSE]              | 42.86 | 2 | 8 | 8  | 31  | -0.39 | -0.55 | -0.84 | -0.63 |
| Q8HW98 | IgLON family member 5 OS=Mus musculus GN=Iglon5 PE=2 SV=2 - [IGLOS_MOUSE]                                      | 29.46 | 1 | 8 | 9  | 49  | 0.53  | -1.41 | -0.88 | -0.56 |
| Q8BGJ5 | MCG13402, isoform CRA_a OS=Mus musculus GN=Pitbp1 PE=2 SV=1 - [Q8BGJ5_MOUSE]                                   | 27.22 | 9 | 8 | 10 | 43  | -0.06 | -0.14 | -0.89 | -0.48 |
| P08030 | Adenine phosphoribosyltransferase OS=Mus musculus GN=Aprt PE=2 SV=2 - [APT_MOUSE]                              | 43.89 | 1 | 8 | 8  | 21  | 0.47  | 0.52  | -0.83 | -0.46 |
| P35951 | Low-density lipoprotein receptor OS=Mus musculus GN=Ldlr PE=1 SV=2 - [LDLR_MOUSE]                              | 11.25 | 1 | 8 | 8  | 19  | 0.34  | -0.90 | -0.64 | -0.45 |
| Q9ESM3 | Hyaluronan and proteoglycan link protein 2 OS=Mus musculus GN=Hapln2 PE=1 SV=1 - [HPLN2_MOUSE]                 | 28.45 | 1 | 8 | 8  | 25  | 0.33  | -0.52 | 2.01  | 2.72  |
| Q64345 | Interferon-induced protein with tetratricopeptide repeats 3 OS=Mus musculus GN=Ifit3 PE=2 SV=1 - [IFIT3_MOUSE] | 23.08 | 2 | 8 | 9  | 13  | 0.13  | 0.26  | 0.68  | 1.70  |
| Q9D2P8 | Myelin-associated oligodendrocyte basic protein OS=Mus musculus GN=Mobp PE=2 SV=1 - [MOBP_MOUSE]               | 42.94 | 5 | 8 | 8  | 62  | -0.75 | -1.32 | 1.12  | 1.34  |
| Q922B1 | O-acetyl-ADP-ribose deacetylase MACROD1 OS=Mus musculus GN=Macro1 PE=2 SV=2 - [MACD1_MOUSE]                    | 26.63 | 1 | 8 | 8  | 36  | 0.21  | 0.46  | 0.58  | 0.96  |
| Q8BQV2 | Choline acetyltransferase OS=Mus musculus GN=Chat PE=2 SV=1 - [Q8BQV2_MOUSE]                                   | 18.45 | 2 | 8 | 9  | 16  | -0.01 | 0.11  | 1.06  | 0.51  |
| P35455 | Vasopressin-neurophysin 2-copeptin OS=Mus musculus GN=Avp PE=2 SV=1 - [NEU2_MOUSE]                             | 72.02 | 1 | 7 | 9  | 109 | 0.28  | 0.26  | -3.64 | -3.09 |
| Q9CXL6 | Doublecortin, isoform CRA_a OS=Mus musculus GN=Dcx PE=2 SV=1 - [Q9CXL6_MOUSE]                                  | 30.56 | 3 | 7 | 11 | 44  | -0.75 | -0.88 | -0.71 | -1.32 |
| Q61166 | Microtubule-associated protein RP/EB family member 1 OS=Mus musculus GN=Mapre1 PE=1 SV=3 - [MARE1_MOUSE]       | 42.54 | 1 | 7 | 11 | 88  | -0.10 | -0.56 | -0.71 | -1.01 |
| P70677 | Caspase-3 OS=Mus musculus GN=Casp3 PE=1 SV=1 - [CASP3_MOUSE]                                                   | 25.63 | 1 | 7 | 7  | 18  | 0.54  | -0.17 | -0.81 | -0.94 |
| Q8K4L2 | Archvillin OS=Mus musculus GN=Svil PE=2 SV=1 - [Q8K4L2_MOUSE]                                                  | 4.58  | 5 | 7 | 8  | 10  | 0.10  | -0.22 | -1.02 | -0.84 |
| P43276 | Histone H1.5 OS=Mus musculus GN=Hist1h1b PE=1 SV=2 - [H15_MOUSE]                                               | 38.57 | 1 | 7 | 13 | 68  | -0.91 | -0.92 | -0.61 | -0.82 |

|         |                                                                                                                    |       |   |   |    |     |       |       |       |       |
|---------|--------------------------------------------------------------------------------------------------------------------|-------|---|---|----|-----|-------|-------|-------|-------|
| Q9DBY8  | Nuclear valosin-containing protein-like OS=Mus musculus GN=Nvl PE=1 SV=1 - [NVL_MOUSE]                             | 10.53 | 1 | 7 | 7  | 12  | -0.02 | -0.39 | -0.52 | -0.61 |
| Q5I02-4 | Isoform 4 of Putative sodium-coupled neutral amino acid transporter 10 OS=Mus musculus GN=Slc38a10 - [S38AA_MOUSE] | 8.14  | 5 | 7 | 8  | 10  | 0.43  | 0.03  | -0.65 | -0.48 |
| Q91XL1  | Leucine-rich HEV glycoprotein (Precursor) OS=Mus musculus GN=Lrg1 PE=2 SV=1 - [Q91XL1_MOUSE]                       | 23.68 | 1 | 7 | 8  | 30  | 2.00  | 1.44  | 1.27  | 2.23  |
| Q80VQ0  | Aldehyde dehydrogenase family 3 member B1 OS=Mus musculus GN=Aldh3b1 PE=2 SV=1 - [AL3B1_MOUSE]                     | 25.21 | 3 | 7 | 9  | 40  | 0.15  | 0.02  | 0.85  | 1.26  |
| P10637  | Microtubule-associated protein tau OS=Mus musculus GN=Mapt PE=1 SV=3 - [TAU_MOUSE]                                 | 51.71 | 5 | 7 | 40 | 555 | 1.23  | -1.00 | 1.60  | 1.23  |
| Q9CQR4  | Acyl-coenzyme A thioesterase 13 OS=Mus musculus GN=Acot13 PE=1 SV=1 - [ACO13_MOUSE]                                | 53.57 | 1 | 7 | 7  | 30  | -0.76 | 0.27  | 0.55  | 0.68  |
| A2AR81  | T-box brain protein 1 OS=Mus musculus GN=Tbr1 PE=2 SV=1 - [A2AR81_MOUSE]                                           | 24.40 | 2 | 7 | 7  | 9   | 0.02  | 1.12  | 1.18  | 0.53  |
| Q9CPQ0  | Prolactin OS=Mus musculus GN=Prl PE=2 SV=2 - [Q9CPQ0_MOUSE]                                                        | 24.00 | 3 | 6 | 6  | 34  | -0.81 | -1.16 | -3.08 | -3.27 |
| P51880  | Fatty acid-binding protein, brain OS=Mus musculus GN=Fabp7 PE=1 SV=2 - [FABP7_MOUSE]                               | 69.70 | 2 | 6 | 7  | 237 | 0.86  | -1.30 | -1.91 | -1.77 |
| Q6PGH2  | Hematological and neurological expressed 1-like protein OS=Mus musculus GN=Hn1l PE=2 SV=1 - [HN1L_MOUSE]           | 41.05 | 2 | 6 | 6  | 30  | 1.69  | -0.94 | -0.71 | -0.66 |
| Q3TVI8  | Pre-B-cell leukemia transcription factor-interacting protein 1 OS=Mus musculus GN=Pbxip1 PE=1 SV=2 - [PBIP1_MOUSE] | 11.69 | 2 | 6 | 6  | 11  | 0.03  | 0.08  | -0.52 | -0.63 |
| Q6P549  | Phosphatidylinositol 3,4,5-trisphosphate 5-phosphatase 2 OS=Mus musculus GN=Inpp1 PE=1 SV=1 - [SHIP2_MOUSE]        | 8.19  | 1 | 6 | 7  | 20  | -0.03 | -0.62 | -0.67 | -0.59 |
| Q9JIS8  | Solute carrier family 12 member 4 OS=Mus musculus GN=Slc12a4 PE=1 SV=2 - [S12A4_MOUSE]                             | 13.09 | 3 | 6 | 12 | 65  | -0.39 | -0.84 | -0.75 | -0.54 |
| Q99KF1  | Transmembrane emp24 domain-containing protein 9 OS=Mus musculus GN=Tmed9 PE=2 SV=2 - [TMED9_MOUSE]                 | 27.66 | 1 | 6 | 7  | 41  | -0.62 | -0.18 | -0.59 | -0.46 |
| P12710  | Fatty acid-binding protein, liver OS=Mus musculus GN=Fabp1 PE=1 SV=2 - [FABPL_MOUSE]                               | 55.91 | 1 | 6 | 6  | 26  | 1.73  | -1.38 | 3.10  | 3.60  |



|          |                                                                                                         |       |   |   |    |      |       |       |       |       |
|----------|---------------------------------------------------------------------------------------------------------|-------|---|---|----|------|-------|-------|-------|-------|
| Q78JT3   | 3-hydroxyanthranilate 3,4-dioxygenase OS=Mus musculus GN=Haoa PE=1 SV=1 - [SHA0_MOUSE]                  | 23.78 | 1 | 6 | 6  | 9    | 0.82  | 0.04  | 1.04  | 1.59  |
| P49429   | 4-hydroxyphenylpyruvate dioxygenase OS=Mus musculus GN=Hpd PE=1 SV=3 - [HPPD_MOUSE]                     | 16.03 | 3 | 6 | 6  | 8    | 0.45  | 0.12  | 0.88  | 1.56  |
| Q8CIM3   | D-2-hydroxyglutarate dehydrogenase, mitochondrial OS=Mus musculus GN=D2hgdh PE=2 SV=3 - [D2HDH_MOUSE]   | 17.94 | 2 | 6 | 6  | 18   | -0.11 | 1.54  | 0.77  | 1.03  |
| Q9WV76   | Carbonic anhydrase 14 OS=Mus musculus GN=Cg14 PE=1 SV=1 - [CAH14_MOUSE]                                 | 20.18 | 1 | 6 | 6  | 37   | 0.53  | -1.16 | 0.80  | 0.95  |
| P51910   | Apolipoprotein D OS=Mus musculus GN=Apod PE=2 SV=1 - [APOD_MOUSE]                                       | 34.92 | 1 | 6 | 6  | 34   | 0.86  | -0.68 | 0.56  | 0.89  |
| G3UZ26   | Serine hydroxymethyltransferase (Fragment) OS=Mus musculus GN=Shmt1 PE=3 SV=1 - [G3UZ26_MOUSE]          | 15.49 | 4 | 6 | 7  | 12   | 0.32  | -0.01 | 0.53  | 0.78  |
| Q61818-2 | Isoform 2 of Retinoic acid-induced protein 1 OS=Mus musculus GN=Rai1 - [RAI1_MOUSE]                     | 5.43  | 2 | 6 | 6  | 12   | -0.27 | -0.15 | 0.59  | 0.74  |
| Q8VED9   | Galectin-related protein OS=Mus musculus GN=Lgalsi PE=1 SV=1 - [LEGL_MOUSE]                             | 62.79 | 1 | 6 | 9  | 75   | -0.27 | 0.76  | 0.72  | 0.61  |
| Q8K0L9-2 | Isoform 2 of Zinc finger and BTB domain-containing protein 20 OS=Mus musculus GN=Zbtb20 - [ZBT20_MOUSE] | 15.72 | 3 | 6 | 7  | 12   | -0.42 | -0.21 | 0.79  | 0.56  |
| A2A5V4   | SH3 domain-binding protein 1 OS=Mus musculus GN=Sh3bp1 PE=2 SV=1 - [A2A5V4_MOUSE]                       | 12.21 | 4 | 6 | 6  | 20   | -0.09 | 0.44  | 0.53  | 0.54  |
| Q9JUZ2   | Tubulin alpha-8 chain OS=Mus musculus GN=Tuba8 PE=1 SV=1 - [TBA8_MOUSE]                                 | 50.33 | 1 | 6 | 22 | 2388 | 0.20  | 0.63  | 0.92  | 0.49  |
| D3Z3A9   | Reticulocalbin-3 (Fragment) OS=Mus musculus GN=Rcn3 PE=2 SV=1 - [D3Z3A9_MOUSE]                          | 22.26 | 4 | 5 | 5  | 9    | 0.25  | 0.74  | -2.20 | -1.93 |
| P26339   | Chromogranin-A OS=Mus musculus GN=Chga PE=1 SV=1 - [CMGA_MOUSE]                                         | 13.61 | 1 | 5 | 5  | 28   | 0.61  | -0.67 | -1.10 | -1.40 |
| P30681   | High mobility group protein B2 OS=Mus musculus GN=Hmgb2 PE=1 SV=3 - [HMG2_MOUSE]                        | 24.76 | 1 | 5 | 6  | 16   | -0.47 | -1.04 | -1.00 | -1.36 |
| Q9JUF0   | Nucleosome assembly protein 1-like 5 OS=Mus musculus GN=Nap15 PE=2 SV=1 - [NP1L5_MOUSE]                 | 21.79 | 1 | 5 | 5  | 28   | -0.76 | -1.77 | -1.41 | -1.33 |
| P97363   | Serine palmitoyltransferase 2 OS=Mus musculus GN=Sptlc2 PE=2 SV=2 - [SPTC2_MOUSE]                       | 11.07 | 1 | 5 | 5  | 7    | -0.53 | -1.04 | -1.09 | -1.04 |
| E0CX20   | Protein BUD31 homolog OS=Mus musculus GN=Bud31 PE=4 SV=1 - [E0CX20_MOUSE]                               | 32.64 | 2 | 5 | 5  | 9    | -0.02 | -0.85 | -0.73 | -0.73 |

|        |                                                                                                               |       |   |   |   |    |       |       |       |       |
|--------|---------------------------------------------------------------------------------------------------------------|-------|---|---|---|----|-------|-------|-------|-------|
| O89103 | Complement component C1q receptor OS=Mus musculus GN=Cd93 PE=1 SV=1 - [C1QR1_MOUSE]                           | 10.25 | 1 | 5 | 5 | 12 | -0.13 | -0.75 | -0.61 | -0.70 |
| Q8CHT3 | Integrator complex subunit 5 OS=Mus musculus GN=Int5 PE=2 SV=1 - [INT5_MOUSE]                                 | 8.74  | 1 | 5 | 5 | 9  | 0.57  | -0.02 | -0.73 | -0.65 |
| J3KMU3 | Uncharacterized protein OS=Mus musculus GN=Gm2058 PE=3 SV=1 - [J3KMU3_MOUSE]                                  | 22.95 | 4 | 5 | 5 | 13 | 0.05  | -0.03 | -0.47 | -0.57 |
| A2A4H9 | Peptidyl-prolyl cis-trans isomerase FKBP10 OS=Mus musculus GN=Fkbp10 PE=2 SV=1 - [A2A4H9_MOUSE]               | 13.86 | 2 | 5 | 5 | 12 | 0.43  | 0.46  | -0.71 | -0.55 |
| P63276 | 40S ribosomal protein S17 OS=Mus musculus GN=Rps17 PE=1 SV=2 - [RS17_MOUSE]                                   | 47.41 | 1 | 5 | 5 | 29 | -1.49 | -0.66 | -0.58 | -0.54 |
| Q99KK1 | Receptor expression-enhancing protein 3 OS=Mus musculus GN=Reep3 PE=1 SV=1 - [REEP3_MOUSE]                    | 19.29 | 2 | 5 | 5 | 12 | 0.25  | -0.96 | -0.70 | -0.53 |
| O88736 | 3-keto-steroid reductase OS=Mus musculus GN=Hsd17b7 PE=2 SV=1 - [DHB7_MOUSE]                                  | 20.06 | 2 | 5 | 5 | 16 | -0.55 | -1.52 | -0.61 | -0.51 |
| Q8BUV8 | Protein GPR107 OS=Mus musculus GN=Gpr107 PE=2 SV=2 - [GP107_MOUSE]                                            | 10.89 | 1 | 5 | 6 | 10 | -0.31 | -0.30 | -0.56 | -0.51 |
| D3YWTO | Signal peptidase complex catalytic subunit SEC11A OS=Mus musculus GN=Sec11a PE=2 SV=1 - [D3YWTO_MOUSE]        | 25.29 | 4 | 5 | 5 | 21 | -0.83 | 0.06  | -0.78 | -0.51 |
| Q9ER65 | Calsyntenin-2 OS=Mus musculus GN=Cistn2 PE=1 SV=2 - [CSTN2_MOUSE]                                             | 7.87  | 2 | 5 | 5 | 14 | 0.20  | -0.20 | -0.55 | -0.50 |
| Q8R3Q0 | Store-operated calcium entry-associated regulatory factor OS=Mus musculus GN=Tmem66 PE=2 SV=2 - [SARAF_MOUSE] | 17.37 | 1 | 5 | 5 | 9  | -0.61 | -0.17 | -0.74 | -0.49 |
| Q07813 | Apoptosis regulator BAX OS=Mus musculus GN=Bax PE=1 SV=1 - [BAX_MOUSE]                                        | 33.33 | 1 | 5 | 5 | 21 | -0.19 | 0.02  | -0.47 | -0.45 |
| Q9QXJ2 | Signal transducer and activator of transcription 2 OS=Mus musculus GN=Stat2 PE=1 SV=1 - [Q9QXJ2_MOUSE]        | 5.75  | 3 | 5 | 5 | 9  | 0.55  | 0.27  | 0.73  | 1.99  |
| P11714 | Cytochrome P450 2D9 OS=Mus musculus GN=Cyp2d9 PE=1 SV=2 - [CP2D9_MOUSE]                                       | 15.08 | 1 | 5 | 5 | 8  | 0.22  | 0.14  | 1.23  | 1.82  |
| P40237 | CD82 antigen OS=Mus musculus GN=Cd82 PE=1 SV=1 - [CD82_MOUSE]                                                 | 16.54 | 3 | 5 | 5 | 37 | 0.40  | -0.68 | 1.25  | 1.35  |
| F8VQG7 | Protein N4bp2 OS=Mus musculus GN=N4bp2 PE=4 SV=1 - [F8VQG7_MOUSE]                                             | 5.07  | 2 | 5 | 6 | 20 | 1.02  | 1.37  | 0.85  | 1.15  |

|          |                                                                                                                    |       |   |   |    |      |       |       |       |       |
|----------|--------------------------------------------------------------------------------------------------------------------|-------|---|---|----|------|-------|-------|-------|-------|
| Q60771   | Claudin-11 OS=Mus musculus GN=Cldn11 PE=1 SV=1 - [CLD11_MOUSE]                                                     | 15.94 | 1 | 5 | 5  | 245  | -0.55 | -1.55 | 0.76  | 1.03  |
| O35215   | D-dopachrome decarboxylase OS=Mus musculus GN=Ddt PE=1 SV=3 - [DOPD_MOUSE]                                         | 55.93 | 2 | 5 | 5  | 13   | 0.73  | 0.12  | 0.68  | 0.97  |
| Q810U3   | Neurofascin OS=Mus musculus GN=Nfasc PE=1 SV=1 - [NFASC_MOUSE]                                                     | 41.69 | 1 | 5 | 47 | 346  | -0.21 | 0.83  | 0.90  | 0.82  |
| J3QNR5   | Uncharacterized protein OS=Mus musculus GN=Tubb4b-ps1 PE=3 SV=1 - [J3QNR5_MOUSE]                                   | 70.72 | 2 | 5 | 28 | 3377 | -0.12 | 0.50  | 0.65  | 0.80  |
| O70209   | PDZ and LIM domain protein 3 OS=Mus musculus GN=Pdlim3 PE=1 SV=1 - [PDLIS_MOUSE]                                   | 28.48 | 1 | 5 | 5  | 15   | 0.06  | 1.93  | 0.55  | 0.63  |
| Q61016   | Guanine nucleotide-binding protein G(I)/G(S)/G(O) subunit gamma-7 OS=Mus musculus GN=Gng7 PE=2 SV=2 - [GBG7_MOUSE] | 67.65 | 3 | 5 | 6  | 29   | -0.09 | 0.99  | 1.74  | 0.63  |
| Q9JMA2   | Queuine tRNA-ribosyltransferase OS=Mus musculus GN=Qtt1 PE=1 SV=2 - [TGT_MOUSE]                                    | 19.35 | 1 | 5 | 6  | 18   | 0.29  | 0.51  | 0.78  | 0.63  |
| Q8CJF9   | Protein argonaute-3 OS=Mus musculus GN=Ago3 PE=2 SV=2 - [AGO3_MOUSE]                                               | 20.23 | 1 | 5 | 15 | 39   | 1.37  | -0.97 | 0.51  | 0.51  |
| Q02105   | Complement C1q subcomponent subunit C OS=Mus musculus GN=C1qc PE=2 SV=2 - [C1QC_MOUSE]                             | 25.20 | 1 | 5 | 5  | 52   | 0.50  | 0.88  | 0.58  | 0.46  |
| Q9CQX2   | Cytochrome b5 type B OS=Mus musculus GN=Cyb5b PE=1 SV=1 - [CYB5B_MOUSE]                                            | 32.19 | 1 | 5 | 5  | 27   | 0.91  | 1.07  | 0.87  | 0.45  |
| Q9D902   | General transcription factor IIE subunit 2 OS=Mus musculus GN=Gtf2e2 PE=2 SV=2 - [T2EB_MOUSE]                      | 15.41 | 1 | 4 | 5  | 8    | -0.52 | -2.75 | -5.79 | -6.26 |
| Q8BVR6   | RING finger and SPRY domain-containing protein 1 OS=Mus musculus GN=Rspry1 PE=2 SV=1 - [RSPRY_MOUSE]               | 8.16  | 3 | 4 | 4  | 4    | 0.70  | -0.56 | -1.43 | -2.25 |
| Q80YN3   | Breast carcinoma-amplified sequence 1 homolog OS=Mus musculus GN=Bcas1 PE=1 SV=3 - [BCAS1_MOUSE]                   | 45.02 | 3 | 4 | 26 | 241  | 0.12  | -3.65 | -0.71 | -1.68 |
| Q19LI2   | Alpha-1B-glycoprotein OS=Mus musculus GN=A1bg PE=1 SV=1 - [A1BG_MOUSE]                                             | 8.79  | 1 | 4 | 4  | 5    | -0.20 | -1.58 | -1.74 | -1.58 |
| Q80VW5-2 | Isoform 2 of Whirlin OS=Mus musculus GN=Dfnb31 - [WHRN_MOUSE]                                                      | 5.38  | 8 | 4 | 4  | 5    | 1.60  | -0.56 | -1.15 | -1.14 |
| Q3TTY5   | Keratin, type II cytoskeletal 2 epidermal OS=Mus musculus GN=Krt2 PE=1 SV=1 - [K22E_MOUSE]                         | 10.47 | 1 | 4 | 6  | 26   | 2.37  | -0.32 | -0.57 | -1.09 |
| P43275   | Histone H1.1 OS=Mus musculus GN=Hist1h1a PE=1 SV=2 - [H11_MOUSE]                                                   | 28.64 | 1 | 4 | 7  | 36   | -0.71 | -0.36 | -0.80 | -1.07 |

|          |                                                                                                                           |       |   |   |    |    |       |       |       |       |
|----------|---------------------------------------------------------------------------------------------------------------------------|-------|---|---|----|----|-------|-------|-------|-------|
| Q8BPB5   | EGF-containing fibulin-like extracellular matrix protein 1 OS=Mus musculus GN=Eltemp1 PE=2 SV=1 - [FBLN3_MOUSE]           | 12.98 | 1 | 4 | 4  | 16 | -0.22 | 0.90  | -1.21 | -1.00 |
| Q6A078   | Centrosomal protein of 290 kDa OS=Mus musculus GN=Cep290 PE=1 SV=2 - [CE290_MOUSE]                                        | 2.79  | 3 | 4 | 8  | 18 | -0.28 | -0.52 | -1.09 | -0.85 |
| Q3UK98   | Chromobox protein homolog 6 OS=Mus musculus GN=Cbx6 PE=2 SV=1 - [Q3UK98_MOUSE]                                            | 10.10 | 4 | 4 | 4  | 4  | -0.43 | -0.47 | -0.80 | -0.85 |
| P50543   | Protein S100-A11 OS=Mus musculus GN=S100a11 PE=2 SV=1 - [S10A1_MOUSE]                                                     | 43.88 | 1 | 4 | 4  | 19 | 0.43  | 0.99  | -1.15 | -0.83 |
| Q8VE98   | CD276 antigen OS=Mus musculus GN=Cd276 PE=1 SV=1 - [CD276_MOUSE]                                                          | 17.72 | 1 | 4 | 4  | 6  | -0.56 | 0.24  | -0.86 | -0.80 |
| Q61555   | Fibrillin-2 OS=Mus musculus GN=Fbn2 PE=1 SV=2 - [FBN2_MOUSE]                                                              | 1.79  | 1 | 4 | 6  | 9  | -0.17 | 1.40  | -0.66 | -0.76 |
| Q6PGA0-2 | Isoform 2 of REST corepressor 3 OS=Mus musculus GN=Rcor3 - [RCOR3_MOUSE]                                                  | 11.06 | 5 | 4 | 4  | 8  | 0.00  | -0.35 | -0.62 | -0.74 |
| Q07646-2 | Isoform 2 of Mesoderm-specific transcript protein OS=Mus musculus GN=Mest - [MEST_MOUSE]                                  | 22.39 | 5 | 4 | 4  | 10 | -0.57 | -0.54 | -1.25 | -0.71 |
| P62960   | Nuclease-sensitive element-binding protein 1 OS=Mus musculus GN=Ybx1 PE=1 SV=3 - [YBOX1_MOUSE]                            | 31.68 | 4 | 4 | 7  | 14 | -0.07 | -1.54 | -0.66 | -0.70 |
| Q8VCH6   | Delta(24)-sterol reductase OS=Mus musculus GN=Dhcr24 PE=2 SV=1 - [DHC24_MOUSE]                                            | 6.20  | 1 | 4 | 4  | 9  | -0.26 | -1.18 | -0.79 | -0.68 |
| P26645   | Myristoylated alanine-rich C-kinase substrate OS=Mus musculus GN=Marcks PE=1 SV=2 - [MARCS_MOUSE]                         | 23.95 | 1 | 4 | 4  | 55 | -0.39 | -1.32 | -0.52 | -0.57 |
| Q9ERR7   | 15 kDa selenoprotein OS=Mus musculus GN=Sep15 PE=1 SV=3 - [SEP15_MOUSE]                                                   | 30.86 | 2 | 4 | 4  | 18 | 0.24  | 0.06  | -0.52 | -0.57 |
| Q60764   | Probable E3 ubiquitin-protein ligase makorin-3 OS=Mus musculus GN=Mkm3 PE=2 SV=2 - [MKRN3_MOUSE]                          | 10.29 | 1 | 4 | 5  | 8  | 0.10  | -0.68 | -0.67 | -0.55 |
| P23475   | X-ray repair cross-complementing protein 6 OS=Mus musculus GN=Xrcc6 PE=1 SV=5 - [XRCC6_MOUSE]                             | 11.51 | 3 | 4 | 8  | 13 | -0.33 | -0.45 | -0.66 | -0.48 |
| Q99LJ6   | Glutathione peroxidase 7 OS=Mus musculus GN=Gpx7 PE=2 SV=1 - [GPX7_MOUSE]                                                 | 22.58 | 1 | 4 | 5  | 15 | -0.38 | -0.35 | -0.90 | -0.48 |
| Q8R4G6   | Alpha-1,6-mannosylglycoprotein 6-beta-N-acetylglucosaminyltransferase A OS=Mus musculus GN=Mgat5 PE=2 SV=1 - [MGTA_MOUSE] | 10.00 | 1 | 4 | 5  | 14 | -0.43 | -0.62 | -0.60 | -0.48 |
| O09106   | Histone deacetylase 1 OS=Mus musculus GN=Hdac1 PE=1 SV=1 - [HDAC1_MOUSE]                                                  | 25.10 | 2 | 4 | 10 | 33 | -0.84 | -0.21 | -0.90 | -0.48 |

|        |                                                                                                                                         |       |   |   |    |      |       |       |       |       |
|--------|-----------------------------------------------------------------------------------------------------------------------------------------|-------|---|---|----|------|-------|-------|-------|-------|
| P60764 | Ras-related C3 botulinum toxin substrate 3<br>OS=Mus musculus<br>GN=Rac3 PE=1 SV=1 - [RAC3_MOUSE]                                       | 42.71 | 8 | 4 | 10 | 79   | -0.72 | -0.56 | -0.97 | -0.48 |
| Q9CY50 | Translocon-associated protein subunit alpha<br>OS=Mus musculus<br>GN=Ssr1 PE=1 SV=1 - [SSRA_MOUSE]                                      | 23.43 | 1 | 4 | 4  | 31   | -0.75 | -0.34 | -0.63 | -0.47 |
| Q62086 | Serum paraoxonase/arylesterase 2<br>OS=Mus musculus<br>GN=Pon2 PE=1 SV=2 - [PON2_MOUSE]                                                 | 17.23 | 1 | 4 | 4  | 14   | -0.51 | -0.69 | -0.72 | -0.45 |
| P11672 | Neutrophil gelatinase-associated lipocalin<br>OS=Mus musculus<br>GN=Lcn2 PE=1 SV=1 - [NGAL_MOUSE]                                       | 23.00 | 1 | 4 | 4  | 7    | 0.45  | 0.47  | 1.99  | 2.82  |
| Q9QXD6 | Fructose-1,6-bisphosphatase 1<br>OS=Mus musculus<br>GN=Fbp1 PE=2 SV=3 - [F16P1_MOUSE]                                                   | 14.50 | 4 | 4 | 4  | 8    | 1.64  | 0.39  | 2.04  | 2.71  |
| Q64374 | Regucalcin<br>OS=Mus musculus<br>GN=Rgn PE=1 SV=1 - [RGN_MOUSE]                                                                         | 17.06 | 1 | 4 | 4  | 24   | 1.09  | 0.26  | 1.34  | 2.30  |
| Q9QZ85 | Interferon-inducible GTPase 1<br>OS=Mus musculus<br>GN=Igp1 PE=1 SV=2 - [IIGP1_MOUSE]                                                   | 13.56 | 1 | 4 | 5  | 8    | 0.22  | 0.46  | 0.65  | 1.51  |
| Q4U4S6 | Xin actin-binding repeat-containing protein 2<br>OS=Mus musculus<br>GN=Xirp2 PE=1 SV=1 - [XIRP2_MOUSE]                                  | 1.48  | 3 | 4 | 6  | 7    | 0.80  | 1.19  | 1.18  | 1.30  |
| E9PUK2 | Uncharacterized aarF domain-containing protein kinase 5<br>OS=Mus musculus<br>GN=Adck5 PE=2 SV=1 - [E9PUK2_MOUSE]                       | 7.39  | 4 | 4 | 4  | 6    | 0.05  | 0.75  | 0.87  | 1.27  |
| L7N451 | Interferon-induced very large GTPase 1<br>OS=Mus musculus<br>GN=Gvin1 PE=4 SV=1 - [L7N451_MOUSE]                                        | 2.43  | 3 | 4 | 4  | 8    | 1.50  | 0.55  | 0.84  | 1.18  |
| Q91WH7 | ATPase, H <sup>+</sup> /K <sup>+</sup> exchanging, gastric, alpha polypeptide<br>OS=Mus musculus<br>GN=Atp4a PE=2 SV=1 - [Q91WH7_MOUSE] | 11.41 | 3 | 4 | 12 | 339  | 0.90  | 0.50  | 1.29  | 1.10  |
| P31725 | Protein S100-A9<br>OS=Mus musculus<br>GN=S100a9 PE=1 SV=3 - [S10A9_MOUSE]                                                               | 38.94 | 1 | 4 | 4  | 12   | 1.48  | 1.28  | 0.53  | 0.98  |
| F6TYB7 | Myelin basic protein (Fragment)<br>OS=Mus musculus<br>GN=Mbp PE=4 SV=1 - [F6TYB7_MOUSE]                                                 | 84.82 | 9 | 4 | 25 | 2287 | 0.68  | -2.80 | 1.27  | 0.97  |
| Q9QY42 | Probable G-protein coupled receptor 37<br>OS=Mus musculus<br>GN=Gpr37 PE=2 SV=1 - [GPR37_MOUSE]                                         | 13.00 | 3 | 4 | 5  | 13   | 0.52  | 0.16  | 0.87  | 0.92  |
| P29788 | Vitronectin<br>OS=Mus musculus<br>GN=Vtn PE=1 SV=2 - [VTNC_MOUSE]                                                                       | 11.09 | 1 | 4 | 5  | 13   | 1.22  | 0.86  | 0.52  | 0.91  |
| E9PZQ0 | Ryanodine receptor 1<br>OS=Mus musculus<br>GN=Ryr1 PE=1 SV=1 - [RZR1_MOUSE]                                                             | 1.37  | 2 | 4 | 8  | 11   | 1.12  | 0.94  | 0.98  | 0.90  |
| P97760 | DNA-directed RNA polymerase II subunit RPB3<br>OS=Mus musculus<br>GN=Polr2c PE=2 SV=1 - [RPB3_MOUSE]                                    | 17.09 | 2 | 4 | 4  | 9    | 0.39  | -0.58 | 0.82  | 0.84  |

|          |                                                                                                                              |       |    |   |    |     |       |       |       |       |
|----------|------------------------------------------------------------------------------------------------------------------------------|-------|----|---|----|-----|-------|-------|-------|-------|
| P13597-2 | Isoform 2 of Intercellular adhesion molecule 1<br>OS=Mus musculus<br>GN=Icam1 - [ICAM1_MOUSE]                                | 7.53  | 2  | 4 | 4  | 8   | 0.61  | 1.24  | 0.76  | 0.79  |
| Q3U213-2 | Isoform 2 of Protein SERAC1<br>OS=Mus musculus<br>GN=Serac1 - [SRAC1_MOUSE]                                                  | 6.57  | 3  | 4 | 4  | 5   | -0.19 | -0.39 | 0.56  | 0.66  |
| Q9JJN2   | Zinc finger homeobox protein 4<br>OS=Mus musculus<br>GN=Zfx4<br>PE=1 SV=1 - [ZFX4_MOUSE]                                     | 2.08  | 4  | 4 | 5  | 6   | 0.51  | 0.49  | 0.64  | 0.59  |
| Q9JMF3   | Guanine nucleotide-binding protein G(I)G(S)G(O) subunit gamma-13<br>OS=Mus musculus<br>GN=Gng13<br>PE=3 SV=1 - [GBG13_MOUSE] | 46.27 | 1  | 4 | 4  | 23  | -0.30 | 1.40  | 1.08  | 0.58  |
| Q64446   | Copper-transporting ATPase 2<br>OS=Mus musculus<br>GN=Atp7b<br>PE=1 SV=2 - [ATP7B_MOUSE]                                     | 3.76  | 2  | 4 | 4  | 4   | 0.35  | 0.34  | 0.62  | 0.55  |
| A2BDQ4   | Eph receptor A7, isoform CRA_b<br>OS=Mus musculus<br>GN=Epha7<br>PE=4 SV=1 - [A2BDQ4_MOUSE]                                  | 11.77 | 10 | 4 | 9  | 20  | 0.91  | 0.36  | 0.76  | 0.52  |
| Q8BG16   | Sodium-dependent neutral amino acid transporter B(O)AT2<br>OS=Mus musculus<br>GN=Slc6a15<br>PE=1 SV=1 - [S6A15_MOUSE]        | 7.82  | 1  | 4 | 4  | 4   | 0.78  | 0.47  | 0.86  | 0.49  |
| A2RTF1   | Cation channel sperm-associated protein subunit beta<br>OS=Mus musculus<br>GN=Catsperb<br>PE=1 SV=1 - [CTSRB_MOUSE]          | 3.97  | 1  | 3 | 3  | 6   | -0.16 | -1.31 | -3.06 | -3.46 |
| A2AVN2   | Glycoprotein hormones alpha chain (Fragment)<br>OS=Mus musculus<br>GN=Cga<br>PE=2 SV=1 - [A2AVN2_MOUSE]                      | 12.82 | 2  | 3 | 3  | 16  | -0.99 | -1.31 | -3.22 | -3.16 |
| O88904-2 | Isoform 2 of Homeodomain-interacting protein kinase 1<br>OS=Mus musculus<br>GN=Hipk1 - [HIPK1_MOUSE]                         | 4.55  | 4  | 3 | 3  | 3   | 0.83  | 0.66  | -3.89 | -3.09 |
| Q14BE7   | Family with sequence similarity 47, member A<br>OS=Mus musculus<br>GN=Fam47c<br>PE=2 SV=1 - [Q14BE7_MOUSE]                   | 6.98  | 1  | 3 | 3  | 3   | 2.72  | -0.01 | -2.22 | -2.43 |
| Q8BP71-5 | Isoform 5 of RNA binding protein fox-1 homolog 2<br>OS=Mus musculus<br>GN=Rbfox2 - [RFOX2_MOUSE]                             | 25.06 | 9  | 3 | 9  | 25  | 2.38  | 0.35  | -1.64 | -1.99 |
| P84228   | Histone H3.2<br>OS=Mus musculus<br>GN=Hist1h3b<br>PE=1 SV=2 - [H32_MOUSE]                                                    | 59.56 | 2  | 3 | 11 | 54  | -1.09 | -1.88 | -1.75 | -1.67 |
| E9PYP8   | Beta-crystallin B1 (Fragment)<br>OS=Mus musculus<br>GN=Crybb1<br>PE=2 SV=1 - [E9PYP8_MOUSE]                                  | 16.95 | 2  | 3 | 3  | 9   | -0.22 | -0.80 | -0.79 | -1.27 |
| P20917   | Myelin-associated glycoprotein<br>OS=Mus musculus<br>GN=Mag<br>PE=1 SV=2 - [MAG_MOUSE]                                       | 31.31 | 1  | 3 | 17 | 196 | 0.67  | -2.16 | -0.63 | -0.90 |
| Q8CG48   | Structural maintenance of chromosomes protein 2<br>OS=Mus musculus<br>GN=Smc2<br>PE=1 SV=2 - [SMC2_MOUSE]                    | 2.69  | 1  | 3 | 3  | 9   | 0.12  | -0.37 | -0.67 | -0.78 |

|          |                                                                                                                                     |       |    |   |    |     |       |       |       |       |
|----------|-------------------------------------------------------------------------------------------------------------------------------------|-------|----|---|----|-----|-------|-------|-------|-------|
| E9Q4X2   | Protein Ugg12 OS=Mus musculus GN=Ugg12 PE=2 SV=1 - [E9Q4X2_MOUSE]                                                                   | 3.72  | 3  | 3 | 8  | 9   | -0.18 | -0.25 | -0.87 | -0.75 |
| Q9CUU3   | Synaptonemal complex protein 2 OS=Mus musculus GN=Sycp2 PE=1 SV=2 - [SYCP2_MOUSE]                                                   | 2.93  | 1  | 3 | 3  | 6   | 1.80  | 0.58  | -1.52 | -0.73 |
| Q8R5A3   | Amyloid beta A4 precursor protein-binding family B member 1-interacting protein OS=Mus musculus GN=Apb1ip PE=1 SV=2 - [AB1IP_MOUSE] | 7.01  | 1  | 3 | 4  | 9   | 0.38  | 0.01  | -0.79 | -0.72 |
| Q3U0J8   | TBC1 domain family member 2B OS=Mus musculus GN=Tbc1d2b PE=1 SV=2 - [TBD2B_MOUSE]                                                   | 4.15  | 2  | 3 | 4  | 5   | -0.12 | 0.16  | -0.66 | -0.67 |
| P16254   | Signal recognition particle 14 kDa protein OS=Mus musculus GN=Srp14 PE=1 SV=1 - [SRP14_MOUSE]                                       | 27.27 | 2  | 3 | 3  | 7   | 0.52  | -0.86 | -0.55 | -0.62 |
| Q8CAY6   | Acetyl-CoA acetyltransferase, cytosolic OS=Mus musculus GN=Acat2 PE=1 SV=2 - [THIC_MOUSE]                                           | 58.69 | 2  | 3 | 17 | 204 | 0.70  | -0.34 | -0.64 | -0.59 |
| Q92111   | Serotransferrin OS=Mus musculus GN=Tf PE=1 SV=1 - [TRFE_MOUSE]                                                                      | 57.96 | 6  | 3 | 44 | 479 | 1.80  | 0.28  | -0.92 | -0.55 |
| Q9CQY5-2 | Isoform 2 of Magnesium transporter protein 1 OS=Mus musculus GN=Magt1 - [MAGT1_MOUSE]                                               | 11.76 | 6  | 3 | 4  | 7   | 0.06  | -0.25 | -0.63 | -0.52 |
| A2A9I0   | Golgi SNAP receptor complex member 2 OS=Mus musculus GN=Cosr2 PE=4 SV=1 - [A2A9I0_MOUSE]                                            | 14.55 | 2  | 3 | 3  | 8   | -0.49 | 0.16  | -0.63 | -0.51 |
| Q9CR89-2 | Isoform 2 of Endoplasmic reticulum-Golgi intermediate compartment protein 2 OS=Mus musculus GN=Ergic2 - [ERGI2_MOUSE]               | 15.56 | 2  | 3 | 3  | 4   | -1.38 | -0.29 | -0.46 | -0.48 |
| Q3URU2   | Paternally-expressed gene 3 protein OS=Mus musculus GN=Peg3 PE=1 SV=1 - [PEG3_MOUSE]                                                | 8.40  | 1  | 3 | 10 | 18  | 0.55  | -0.30 | -0.61 | -0.47 |
| Q61183-4 | Isoform 4 of Poly(A) polymerase alpha OS=Mus musculus GN=Papola - [PAPOA_MOUSE]                                                     | 7.46  | 13 | 3 | 4  | 5   | -0.55 | -0.51 | -0.57 | -0.47 |
| Q9D8T4   | Golgi apparatus membrane protein TVP23 homolog B OS=Mus musculus GN=Tvp23b PE=1 SV=1 - [TV23B_MOUSE]                                | 11.71 | 2  | 3 | 3  | 4   | -0.91 | -0.42 | -0.49 | -0.46 |
| Q9D3P8   | Plasminogen receptor (KT) OS=Mus musculus GN=Plgrkt PE=1 SV=1 - [PLRKKT_MOUSE]                                                      | 19.05 | 4  | 3 | 3  | 13  | -1.09 | -0.17 | -0.57 | -0.46 |
| E9Q4M8   | Delta(14)-sterol reductase OS=Mus musculus GN=Tm7sf2 PE=2 SV=1 - [E9Q4M8_MOUSE]                                                     | 8.77  | 7  | 3 | 3  | 4   | -0.01 | -0.82 | -0.51 | -0.46 |
| A6H6E2   | Multimerin-2 OS=Mus musculus GN=Mmm2 PE=2 SV=1 - [MMRN2_MOUSE]                                                                      | 4.24  | 1  | 3 | 4  | 11  | 0.34  | 0.21  | -0.68 | -0.45 |

|          |                                                                                                                |       |   |   |    |     |       |       |      |      |
|----------|----------------------------------------------------------------------------------------------------------------|-------|---|---|----|-----|-------|-------|------|------|
| P05367   | Serum amyloid A-2 protein OS=Mus musculus GN=Saa2 PE=1 SV=1 - [SAA2_MOUSE]                                     | 28.69 | 1 | 3 | 4  | 12  | 0.93  | 0.89  | 3.45 | 4.60 |
| Q91X83   | S-adenosylmethionine synthase isoform type-1 OS=Mus musculus GN=Mat1a PE=2 SV=1 - [METK1_MOUSE]                | 10.86 | 1 | 3 | 4  | 9   | 0.34  | -0.51 | 1.78 | 2.52 |
| Q60590   | Alpha-1-acid glycoprotein 1 OS=Mus musculus GN=Orm1 PE=1 SV=1 - [A1AG1_MOUSE]                                  | 20.77 | 1 | 3 | 5  | 10  | 2.36  | 1.75  | 1.66 | 2.19 |
| Q64282   | Interferon-induced protein with tetratricopeptide repeats 1 OS=Mus musculus GN=Ifit1 PE=1 SV=2 - [IFIT1_MOUSE] | 12.96 | 4 | 3 | 3  | 5   | -0.86 | 0.98  | 0.99 | 2.09 |
| Q63880-2 | Isoform 2 of Carboxylesterase 3A OS=Mus musculus GN=Ces3a - [EST3A_MOUSE]                                      | 8.02  | 6 | 3 | 4  | 19  | 0.44  | -0.38 | 1.21 | 2.07 |
| D3YU60   | Microsomal glutathione S-transferase 1 OS=Mus musculus GN=Mgst1 PE=2 SV=1 - [D3YU60_MOUSE]                     | 45.10 | 4 | 3 | 3  | 5   | 0.47  | -0.08 | 0.83 | 1.94 |
| Q8R1A8   | Ornithine carbonyltransferase, mitochondrial OS=Mus musculus GN=Otc PE=2 SV=1 - [Q8R1A8_MOUSE]                 | 9.69  | 2 | 3 | 3  | 10  | 0.67  | 0.35  | 0.97 | 1.55 |
| Q9D8H7   | Metalloendopeptidase OMA1, mitochondrial OS=Mus musculus GN=Oma1 PE=2 SV=1 - [OMA1_MOUSE]                      | 5.18  | 1 | 3 | 3  | 3   | 1.01  | 0.83  | 0.68 | 1.45 |
| Q62095   | ATP-dependent RNA helicase DDX3Y OS=Mus musculus GN=Ddx3y PE=1 SV=2 - [DDX3Y_MOUSE]                            | 44.68 | 1 | 3 | 30 | 153 | 0.72  | 0.71  | 0.95 | 1.24 |
| P70121   | Zinc fingers and homeoboxes protein 1 OS=Mus musculus GN=Zfx1 PE=1 SV=2 - [ZHX1_MOUSE]                         | 5.04  | 2 | 3 | 4  | 7   | 1.32  | 1.32  | 1.20 | 1.20 |
| PODM40   | Fer-1-like protein 5 OS=Mus musculus GN=Fer15 PE=1 SV=1 - [FR1L5_MOUSE]                                        | 1.37  | 1 | 3 | 3  | 4   | 0.04  | 0.22  | 1.17 | 1.11 |
| Q8CFB4   | Guanylate-binding protein 5 OS=Mus musculus GN=Gbp5 PE=1 SV=2 - [GBP5_MOUSE]                                   | 6.27  | 1 | 3 | 3  | 4   | 0.83  | 0.51  | 0.80 | 1.11 |
| Q91X56   | Sphingosine 1-phosphate receptor 5 OS=Mus musculus GN=S1pr5 PE=2 SV=1 - [S1PR5_MOUSE]                          | 13.00 | 1 | 3 | 3  | 6   | 0.52  | -0.24 | 1.16 | 1.05 |
| Q6PGB8   | Probable global transcription activator SNF2L1 OS=Mus musculus GN=Smarca1 PE=1 SV=1 - [SMCA1_MOUSE]            | 8.03  | 4 | 3 | 10 | 18  | -0.30 | -0.28 | 1.74 | 0.93 |
| Q9WVF8   | Tumor suppressor candidate 2 OS=Mus musculus GN=Tusc2 PE=1 SV=3 - [TUSC2_MOUSE]                                | 41.82 | 1 | 3 | 3  | 8   | 0.28  | -0.27 | 0.95 | 0.86 |
| O88700   | Bloom syndrome protein homolog OS=Mus musculus GN=Blm PE=1 SV=1 - [BLM_MOUSE]                                  | 3.25  | 2 | 3 | 4  | 4   | 0.56  | 0.29  | 0.51 | 0.84 |



|          |                                                                                                                             |       |   |   |   |    |       |       |       |       |
|----------|-----------------------------------------------------------------------------------------------------------------------------|-------|---|---|---|----|-------|-------|-------|-------|
| F7D143   | Uncharacterized protein KIAA0232 (Fragment)<br>OS=Mus musculus<br>GN=D5Erdt579e PE=2 SV=1 -<br>[F7D143_MOUSE]               | 4.00  | 3 | 3 | 3 | 3  | 0.24  | 0.42  | 1.05  | 0.79  |
| Q8VD26-2 | Isoform 2 of Transmembrane protein 143<br>OS=Mus musculus<br>GN=Tmem143 -<br>[TM143_MOUSE]                                  | 8.61  | 4 | 3 | 3 | 11 | -0.93 | 0.24  | 0.58  | 0.73  |
| B1AS67   | Pleckstrin homology domain-containing family G member 5<br>OS=Mus musculus<br>GN=Plekhg5 PE=2 SV=1 -<br>[B1AS67_MOUSE]      | 4.62  | 5 | 3 | 4 | 9  | -0.08 | 0.09  | 0.78  | 0.66  |
| Q8BJ56-3 | Isoform 3 of Patatin-like phospholipase domain-containing protein 2<br>OS=Mus musculus<br>GN=Pnpla2 -<br>[PLPL2_MOUSE]      | 10.00 | 5 | 3 | 3 | 6  | 1.07  | -0.21 | 0.58  | 0.61  |
| E9PVX6   | Protein Mki67<br>OS=Mus musculus<br>GN=Mki67 PE=2 SV=1 -<br>[E9PVX6_MOUSE]                                                  | 1.07  | 1 | 3 | 3 | 3  | 1.67  | 1.03  | 1.94  | 0.59  |
| Q8CII2   | Cell division cycle protein 123 homolog<br>OS=Mus musculus<br>GN=Cdc123 PE=2 SV=2 -<br>[CD123_MOUSE]                        | 11.31 | 2 | 3 | 4 | 16 | 0.89  | 1.14  | 0.91  | 0.59  |
| E9QJV4   | Pre-mRNA-processing factor 39<br>OS=Mus musculus<br>GN=Pfp39 PE=2 SV=1 -<br>[E9QJV4_MOUSE]                                  | 5.56  | 3 | 3 | 3 | 6  | 1.22  | 0.40  | 0.52  | 0.58  |
| Q80SZ7   | Guanine nucleotide-binding protein G(I)/G(S)/G(O) subunit gamma-5<br>OS=Mus musculus<br>GN=Gng5 PE=2 SV=2 -<br>[GBG5_MOUSE] | 33.82 | 2 | 3 | 3 | 12 | 0.99  | 0.68  | 0.54  | 0.55  |
| Q78TU8   | Family with sequence similarity 107, member A<br>OS=Mus musculus<br>GN=Fam107a PE=2 SV=1 -<br>[Q78TU8_MOUSE]                | 24.31 | 4 | 3 | 4 | 14 | -0.15 | -0.34 | 1.18  | 0.54  |
| Q3UHN9   | Bifunctional heparan sulfate N-deacetylase/N-sulfotransferase 1<br>OS=Mus musculus<br>GN=Ndst1 PE=1 SV=2 -<br>[NDST1_MOUSE] | 5.56  | 2 | 3 | 4 | 6  | 0.07  | -0.52 | 0.90  | 0.50  |
| P52963   | Band 4.1-like protein 4A<br>OS=Mus musculus<br>GN=Epb4 14a PE=2 SV=2 -<br>[E41LA_MOUSE]                                     | 5.83  | 1 | 3 | 3 | 4  | 0.38  | -0.59 | 0.53  | 0.49  |
| B1AWT2   | Ras-related GTP binding D, isoform CRA_a<br>OS=Mus musculus<br>GN=Rragd PE=4 SV=1 -<br>[B1AWT2_MOUSE]                       | 13.53 | 4 | 3 | 5 | 14 | -0.54 | 1.16  | 0.95  | 0.47  |
| A2ALI5   | Adherens junction-associated protein 1<br>OS=Mus musculus<br>GN=Ajap1 PE=2 SV=1 -<br>[AJAP1_MOUSE]                          | 11.65 | 1 | 3 | 3 | 6  | 0.69  | 0.61  | 0.83  | 0.47  |
| B1AVY7   | Kinesin-like protein KIF16B<br>OS=Mus musculus<br>GN=Kif16b PE=1 SV=1 -<br>[K16B_MOUSE]                                     | 4.34  | 1 | 3 | 6 | 13 | 0.80  | 0.00  | 0.52  | 0.46  |
| G3X9G6   | Luteinizing hormone beta<br>OS=Mus musculus<br>GN=Lhb PE=3 SV=1 -<br>[G3X9G6_MOUSE]                                         | 21.99 | 2 | 2 | 2 | 9  | -2.30 | -2.91 | -4.79 | -4.91 |

|          |                                                                                                                     |       |   |   |    |     |       |       |       |       |
|----------|---------------------------------------------------------------------------------------------------------------------|-------|---|---|----|-----|-------|-------|-------|-------|
| K4DI78   | SH3 domain-binding glutamic acid-rich protein OS=Mus musculus GN=Sh3bgr PE=4 SV=1 - [K4DI78_MOUSE]                  | 19.23 | 5 | 2 | 2  | 3   | 1.52  | -2.00 | -4.20 | -4.39 |
| Q810Y9   | PRAME16 OS=Mus musculus GN=Prame16 PE=2 SV=1 - [Q810Y9_MOUSE]                                                       | 5.98  | 1 | 2 | 2  | 2   | 1.66  | -1.51 | -3.55 | -4.01 |
| E9Q2X6   | Structural maintenance of chromosomes protein OS=Mus musculus GN=Smc4 PE=2 SV=1 - [E9Q2X6_MOUSE]                    | 2.46  | 2 | 2 | 4  | 5   | 4.77  | -0.13 | -4.20 | -3.92 |
| Q7TQE7-2 | Isoform 2 of Uncharacterized protein KIAA0895 OS=Mus musculus GN=Kiaa0895 - [K0895_MOUSE]                           | 10.55 | 2 | 2 | 2  | 2   | 4.21  | 2.35  | -1.41 | -2.66 |
| F8VQD3   | Protein Vmn2r37 OS=Mus musculus GN=Vmn2r37 PE=3 SV=1 - [F8VQD3_MOUSE]                                               | 4.24  | 2 | 2 | 2  | 3   | -3.39 | -2.27 | -2.91 | -2.57 |
| Q9DBZ1-2 | Isoform 2 of Inhibitor of nuclear factor kappa-B kinase-interacting protein OS=Mus musculus GN=Ikkip - [IKIP_MOUSE] | 5.51  | 1 | 2 | 2  | 5   | -0.25 | -1.03 | -2.60 | -2.46 |
| P28667   | MARCKS-related protein OS=Mus musculus GN=Marcks11 PE=1 SV=2 - [MRP_MOUSE]                                          | 6.50  | 1 | 2 | 2  | 8   | -0.58 | -2.54 | -2.07 | -2.45 |
| P35454   | Oxytocin-neurophysin 1 OS=Mus musculus GN=Oxt PE=2 SV=1 - [NEU1_MOUSE]                                              | 50.40 | 1 | 2 | 4  | 57  | 0.12  | 0.60  | -2.64 | -2.42 |
| P09813   | Apolipoprotein A-II OS=Mus musculus GN=Apoa2 PE=1 SV=2 - [APOA2_MOUSE]                                              | 18.63 | 1 | 2 | 2  | 10  | 1.79  | -1.15 | -1.66 | -1.78 |
| Q8BGD6   | Putative sodium-coupled neutral amino acid transporter 9 OS=Mus musculus GN=Slc38a9 PE=1 SV=1 - [S38A9_MOUSE]       | 4.46  | 1 | 2 | 2  | 5   | 2.31  | -0.30 | -1.33 | -1.75 |
| Q80VP5   | Probable peptide chain release factor C12orf65 homolog, mitochondrial OS=Mus musculus PE=1 SV=1 - [CL065_MOUSE]     | 13.59 | 3 | 2 | 2  | 2   | 2.16  | -1.24 | -1.49 | -1.69 |
| G3UZJ2   | Microtubule-associated protein (Fragment) OS=Mus musculus GN=Map2 PE=2 SV=1 - [G3UZJ2_MOUSE]                        | 71.78 | 1 | 2 | 22 | 183 | -0.01 | -0.88 | -1.27 | -1.46 |
| Q9ZOF1-2 | Isoform Nesp55-2 of Neuroendocrine secretory protein 55 OS=Mus musculus GN=Gnas - [GNAS3_MOUSE]                     | 7.91  | 2 | 2 | 2  | 7   | 0.23  | -1.17 | -1.73 | -1.43 |
| Q9ER41   | Torsin-1B OS=Mus musculus GN=Tor1b PE=2 SV=2 - [TOR1B_MOUSE]                                                        | 10.12 | 4 | 2 | 2  | 3   | 1.04  | -1.11 | -0.74 | -1.42 |
| Q8VI24-2 | Isoform 2 of DNA-binding protein SATB2 OS=Mus musculus GN=Satb2 - [SATB2_MOUSE]                                     | 2.97  | 3 | 2 | 2  | 2   | 0.09  | 0.92  | -1.32 | -1.34 |
| Q6NS65   | Uracil nucleotide/cysteinyll leukotriene receptor OS=Mus musculus GN=Gpr17 PE=2 SV=1 - [GPR17_MOUSE]                | 5.31  | 1 | 2 | 2  | 5   | -0.20 | -0.75 | -1.06 | -1.32 |

|          |                                                                                                              |       |   |   |    |      |       |       |       |       |
|----------|--------------------------------------------------------------------------------------------------------------|-------|---|---|----|------|-------|-------|-------|-------|
| Q4QRL3   | Coiled-coil domain-containing protein 88B<br>OS=Mus musculus<br>GN=Ccdc88b PE=1<br>SV=2 - [CC88B_MOUSE]      | 3.04  | 2 | 2 | 3  | 3    | 0.41  | -1.80 | -1.84 | -1.28 |
| Q9D9X8-2 | Isoform 2 of Sperm acrosome membrane-associated protein 3<br>OS=Mus musculus<br>GN=Spaca3 - [SACA3_MOUSE]    | 32.52 | 2 | 2 | 2  | 4    | 0.29  | -1.18 | -1.07 | -1.22 |
| D3YUR6   | Transmembrane protein 169 (Fragment) OS=Mus musculus GN=Tmem169<br>PE=2 SV=1 - [D3YUR6_MOUSE]                | 21.67 | 2 | 2 | 2  | 3    | -0.70 | -1.31 | -0.55 | -1.18 |
| Q9QWK5   | Baculoviral IAP repeat-containing protein 1a<br>OS=Mus musculus<br>GN=Naip1 PE=2 SV=3 - [BIR1A_MOUSE]        | 1.85  | 3 | 2 | 2  | 4    | 1.01  | 0.47  | -0.94 | -1.12 |
| Q8K094   | Poliovirus receptor<br>OS=Mus musculus<br>GN=Pvr PE=2 SV=1 - [Q8K094_MOUSE]                                  | 9.80  | 1 | 2 | 2  | 4    | 0.61  | -0.24 | -0.87 | -1.12 |
| P97378   | Interleukin-12 receptor subunit beta-2 OS=Mus musculus GN=Il12rb2<br>PE=1 SV=1 - [I12R2_MOUSE]               | 3.20  | 2 | 2 | 2  | 3    | 1.58  | 0.14  | -1.40 | -1.09 |
| Q6SSC2   | N-acetylglucosamine-1-phosphotransferase subunit gamma OS=Mus musculus GN=Gnptg<br>PE=2 SV=1 - [GNPTG_MOUSE] | 10.42 | 2 | 2 | 2  | 4    | 0.60  | -0.11 | -1.31 | -1.08 |
| Q9CWF2   | Tubulin beta-2B chain<br>OS=Mus musculus<br>GN=Tubb2b PE=1 SV=1 - [TBB2B_MOUSE]                              | 83.82 | 2 | 2 | 33 | 4745 | -0.72 | -1.02 | -1.26 | -1.04 |
| Q3V188   | Poly(U)-specific endoribonuclease<br>OS=Mus musculus<br>GN=Endou PE=2 SV=1 - [ENDOU_MOUSE]                   | 5.83  | 2 | 2 | 2  | 6    | -0.53 | -0.98 | -0.47 | -1.04 |
| Q8R0K2   | E3 ubiquitin-protein ligase TRIM31 OS=Mus musculus GN=Trim31<br>PE=1 SV=1 - [TRI31_MOUSE]                    | 7.10  | 1 | 2 | 3  | 4    | 0.69  | -0.36 | -1.13 | -1.03 |
| O88566   | Axin-2 OS=Mus musculus GN=Axin2<br>PE=1 SV=2 - [AXIN2_MOUSE]                                                 | 2.14  | 2 | 2 | 2  | 2    | -0.22 | -0.58 | -0.68 | -0.93 |
| Q5MPP0-2 | Isoform 2 of Fatty acid 2-hydroxylase OS=Mus musculus GN=Fa2h - [FA2H_MOUSE]                                 | 8.63  | 2 | 2 | 2  | 6    | 1.08  | -1.72 | -1.05 | -0.88 |
| Q6NXL1   | Protein Sec24d OS=Mus musculus GN=Sec24d<br>PE=2 SV=1 - [Q6NXL1_MOUSE]                                       | 3.00  | 1 | 2 | 3  | 5    | -0.65 | 0.17  | -1.00 | -0.84 |
| G5E8Q8   | MCG115189 OS=Mus musculus GN=Gpr116<br>PE=4 SV=1 - [G5E8Q8_MOUSE]                                            | 3.41  | 1 | 2 | 2  | 4    | -0.05 | 0.10  | -0.62 | -0.82 |
| P97864   | Caspase-7 OS=Mus musculus GN=Casp7<br>PE=1 SV=2 - [CASP7_MOUSE]                                              | 7.92  | 1 | 2 | 2  | 3    | 0.52  | -0.87 | -0.61 | -0.79 |
| P70213   | Friend virus susceptibility protein 1 OS=Mus musculus GN=Fv1 PE=2<br>SV=1 - [FV1_MOUSE]                      | 7.41  | 1 | 2 | 2  | 3    | -0.58 | -0.35 | -1.62 | -0.78 |
| Q9EQ08   | Heparan N-sulfatase<br>OS=Mus musculus<br>GN=Sgsh PE=2 SV=1 - [Q9EQ08_MOUSE]                                 | 6.57  | 1 | 2 | 2  | 3    | 2.45  | -1.06 | -0.76 | -0.73 |

|          |                                                                                                                             |       |   |   |   |    |       |       |       |       |
|----------|-----------------------------------------------------------------------------------------------------------------------------|-------|---|---|---|----|-------|-------|-------|-------|
| D3Z4D1   | Protein JTB OS=Mus musculus GN=Jtb PE=2 SV=1 - [D3Z4D1_MOUSE]                                                               | 21.05 | 2 | 2 | 2 | 4  | 0.19  | -0.40 | -1.64 | -0.71 |
| Q9JHP7-3 | Isoform 3 of KDELI motif-containing protein 1 OS=Mus musculus GN=Kdelc1 - [KDELI1_MOUSE]                                    | 9.93  | 4 | 2 | 2 | 3  | 1.06  | -0.29 | -1.21 | -0.66 |
| Q9D9Q0   | Leucine-rich repeat-containing protein 69 OS=Mus musculus GN=Lrrc69 PE=2 SV=1 - [LRC69_MOUSE]                               | 6.05  | 1 | 2 | 2 | 4  | 1.05  | 0.18  | -0.53 | -0.66 |
| Q9QY40   | Plexin-B3 OS=Mus musculus GN=Ptxnb3 PE=1 SV=2 - [PLXB3_MOUSE]                                                               | 2.73  | 1 | 2 | 6 | 23 | 0.01  | -1.55 | -0.68 | -0.62 |
| Q9DCD6   | Gamma-aminobutyric acid receptor-associated protein OS=Mus musculus GN=Gabarap PE=1 SV=2 - [GBRAP_MOUSE]                    | 39.32 | 2 | 2 | 6 | 14 | 0.42  | -0.71 | -0.56 | -0.61 |
| Q8R4P9-2 | Isoform 2 of Multidrug resistance-associated protein 7 OS=Mus musculus GN=Abcc10 - [MRP7_MOUSE]                             | 1.99  | 4 | 2 | 2 | 3  | 0.14  | -0.40 | -0.56 | -0.60 |
| Q64519   | Syndecan-3 OS=Mus musculus GN=Sdc3 PE=2 SV=2 - [SDC3_MOUSE]                                                                 | 7.92  | 1 | 2 | 2 | 12 | -1.26 | -0.12 | -0.67 | -0.59 |
| P41317   | Mannose-binding protein C OS=Mus musculus GN=Mbl2 PE=2 SV=2 - [MBL2_MOUSE]                                                  | 12.30 | 1 | 2 | 2 | 4  | 1.18  | 0.39  | -1.37 | -0.58 |
| Q9D173   | Mitochondrial import receptor subunit TOM7 homolog OS=Mus musculus GN=Tom7 PE=3 SV=1 - [TOM7_MOUSE]                         | 41.82 | 1 | 2 | 2 | 2  | 0.72  | -0.38 | -0.56 | -0.53 |
| Q9CZP0   | Ufm1-specific protease 1 OS=Mus musculus GN=Ufsp1 PE=1 SV=1 - [UFS1_MOUSE]                                                  | 17.51 | 1 | 2 | 2 | 3  | 0.37  | -0.20 | -0.48 | -0.50 |
| E9Q8R5   | TraB domain-containing protein OS=Mus musculus GN=Trabd PE=2 SV=1 - [E9Q8R5_MOUSE]                                          | 8.13  | 3 | 2 | 2 | 5  | -0.30 | -0.26 | -0.60 | -0.49 |
| Q8BZX4-2 | Isoform 2 of Splicing regulatory glutamine/lysine-rich protein 1 OS=Mus musculus GN=Srek1 - [SREK1_MOUSE]                   | 4.43  | 2 | 2 | 2 | 8  | -1.75 | -0.36 | -0.58 | -0.48 |
| Q923Q2   | STAR-related lipid transfer protein 13 OS=Mus musculus GN=Stard13 PE=1 SV=5 - [STA13_MOUSE]                                 | 2.34  | 2 | 2 | 2 | 3  | 1.15  | -0.27 | -0.54 | -0.48 |
| Q62010   | Oviduct-specific glycoprotein OS=Mus musculus GN=Ovgp1 PE=2 SV=1 - [OVGP1_MOUSE]                                            | 1.94  | 1 | 2 | 2 | 2  | 0.26  | -1.03 | -0.73 | -0.48 |
| Q3UMG5-2 | Isoform 2 of Leucine-rich repeat and calponin homology domain-containing protein 2 OS=Mus musculus GN=Lrch2 - [LRCH2_MOUSE] | 6.92  | 6 | 2 | 2 | 3  | -0.23 | 0.52  | -0.95 | -0.48 |
| Q8C407   | Protein YIPF4 OS=Mus musculus GN=Yipf4 PE=2 SV=1 - [YIPF4_MOUSE]                                                            | 8.13  | 2 | 2 | 2 | 6  | -0.47 | -0.23 | -0.62 | -0.47 |
| O08738   | Caspase-6 OS=Mus musculus GN=Casp6 PE=2 SV=1 - [CASP6_MOUSE]                                                                | 7.25  | 1 | 2 | 2 | 3  | 0.55  | 0.65  | -0.55 | -0.45 |

|          |                                                                                                |       |   |   |    |     |       |       |      |      |
|----------|------------------------------------------------------------------------------------------------|-------|---|---|----|-----|-------|-------|------|------|
| P05366   | Serum amyloid A-1 protein OS=Mus musculus GN=Saa1 PE=2 SV=2 - [SAA1_MOUSE]                     | 27.05 | 1 | 2 | 3  | 15  | 0.62  | -0.20 | 3.67 | 4.87 |
| Q8R366   | Immunoglobulin superfamily member 8 OS=Mus musculus GN=Igsf8 PE=1 SV=2 - [IGSF8_MOUSE]         | 35.68 | 2 | 2 | 17 | 151 | 1.33  | 2.96  | 2.76 | 3.72 |
| Q9QXF8   | Glycine N-methyltransferase OS=Mus musculus GN=Gnmt PE=1 SV=3 - [GNMT_MOUSE]                   | 12.63 | 1 | 2 | 2  | 14  | 1.98  | 0.16  | 2.58 | 3.26 |
| B6VJS2   | 5-hydroxytryptamine receptor 7 OS=Mus musculus GN=Htr7 PE=2 SV=1 - [B6VJS2_MOUSE]              | 3.68  | 3 | 2 | 2  | 3   | 0.79  | -0.73 | 2.42 | 3.15 |
| Q8K4J0-3 | Isoform 3 of Protein artemis OS=Mus musculus GN=Dcre1c - [DCR1C_MOUSE]                         | 6.98  | 5 | 2 | 3  | 6   | 0.23  | 3.86  | 4.36 | 2.88 |
| A2AKN9   | Major urinary protein 2 OS=Mus musculus GN=Mup2 PE=2 SV=1 - [A2AKN9_MOUSE]                     | 53.89 | 8 | 2 | 8  | 26  | 1.85  | 1.00  | 1.78 | 2.44 |
| P16331   | Phenylalanine-4-hydroxylase OS=Mus musculus GN=Pah PE=1 SV=4 - [PH4H_MOUSE]                    | 4.19  | 2 | 2 | 2  | 3   | -0.29 | 0.11  | 1.19 | 1.71 |
| E9QAK1   | Protein 2810007J24Rik (Fragment) OS=Mus musculus GN=2810007J24Rik PE=2 SV=1 - [E9QAK1_MOUSE]   | 13.76 | 2 | 2 | 2  | 4   | 0.48  | 0.25  | 0.95 | 1.63 |
| P12399   | Protein CTLA-2-alpha OS=Mus musculus GN=Ctla2a PE=2 SV=2 - [CTL2A_MOUSE]                       | 18.25 | 2 | 2 | 2  | 4   | 1.43  | 0.14  | 1.71 | 1.59 |
| Q8CB59-2 | Isoform 2 of Protein FAM161B OS=Mus musculus GN=Fam161b - [F161B_MOUSE]                        | 5.54  | 2 | 2 | 2  | 2   | 0.69  | 1.75  | 0.92 | 1.56 |
| Q8BIR2-2 | Isoform 2 of Protein asteroid homolog 1 OS=Mus musculus GN=Aste1 - [ASTE1_MOUSE]               | 5.24  | 4 | 2 | 4  | 7   | 0.07  | -2.57 | 0.88 | 1.44 |
| Q9D8M3   | Heme transporter HRG1 OS=Mus musculus GN=Slc48a1 PE=2 SV=1 - [HRG1_MOUSE]                      | 12.33 | 2 | 2 | 2  | 2   | 2.03  | 0.56  | 0.79 | 1.44 |
| Q9DBT9   | Dimethylglycine dehydrogenase, mitochondrial OS=Mus musculus GN=Dmgdh PE=1 SV=1 - [M2GD_MOUSE] | 3.11  | 1 | 2 | 2  | 3   | 0.28  | -0.69 | 1.09 | 1.35 |
| E0CZG7   | Glycerate kinase (Fragment) OS=Mus musculus GN=Glyck PE=2 SV=1 - [E0CZG7_MOUSE]                | 20.63 | 3 | 2 | 2  | 4   | 0.20  | -1.53 | 1.72 | 1.25 |
| Q64332   | Synapsin-2 OS=Mus musculus GN=Syn2 PE=1 SV=2 - [SYN2_MOUSE]                                    | 58.02 | 1 | 2 | 26 | 740 | -0.71 | 2.15  | 1.62 | 1.23 |
| Q6TL19   | Guanylate cyclase 2G OS=Mus musculus GN=Gucy2g PE=1 SV=1 - [GUC2G_MOUSE]                       | 2.64  | 1 | 2 | 3  | 5   | 1.87  | 0.61  | 1.03 | 1.22 |
| P70689   | Gap junction beta-6 protein OS=Mus musculus GN=Cjpb6 PE=1 SV=1 - [CXB6_MOUSE]                  | 10.73 | 2 | 2 | 2  | 3   | -0.16 | 0.01  | 0.73 | 1.21 |

|          |                                                                                                                                          |       |   |   |   |    |       |       |      |      |
|----------|------------------------------------------------------------------------------------------------------------------------------------------|-------|---|---|---|----|-------|-------|------|------|
| P35487   | Pyruvate dehydrogenase E1 component subunit alpha, testis-specific form, mitochondrial OS=Mus musculus GN=Pdh2 PE=2 SV=1 - [ODPAT_MOUSE] | 8.95  | 1 | 2 | 4 | 26 | 0.42  | 0.49  | 0.94 | 1.19 |
| P27005   | Protein S100-A8 OS=Mus musculus GN=S100a8 PE=1 SV=3 - [S10A8_MOUSE]                                                                      | 46.07 | 1 | 2 | 2 | 4  | 1.89  | 1.06  | 0.75 | 1.14 |
| P06683   | Complement component C9 OS=Mus musculus GN=C9 PE=1 SV=2 - [CO9_MOUSE]                                                                    | 3.65  | 2 | 2 | 2 | 6  | 1.74  | 0.98  | 0.72 | 1.12 |
| Q8C838   | Tumor suppressor candidate 5 homolog OS=Mus musculus GN=Tusc5 PE=2 SV=1 - [TUSC5_MOUSE]                                                  | 17.34 | 1 | 2 | 2 | 3  | 0.34  | -0.34 | 0.96 | 0.97 |
| P43136   | Nuclear receptor subfamily 2 group F member 6 OS=Mus musculus GN=Nr2f6 PE=1 SV=2 - [NR2F6_MOUSE]                                         | 11.03 | 3 | 2 | 2 | 6  | -0.51 | -0.93 | 1.22 | 0.94 |
| F6ZAW1   | Protein Cald1 (Fragment) OS=Mus musculus GN=Cald1 PE=4 SV=1 - [F6ZAW1_MOUSE]                                                             | 35.07 | 2 | 2 | 9 | 36 | -1.13 | 1.45  | 0.85 | 0.93 |
| P58660   | Caspase recruitment domain-containing protein 10 OS=Mus musculus GN=Card10 PE=2 SV=1 - [CAR10_MOUSE]                                     | 4.31  | 2 | 2 | 4 | 6  | 4.75  | 0.82  | 0.99 | 0.91 |
| Q6A044-2 | Isoform 2 of Protein FAM189A1 OS=Mus musculus GN=Fam189a1 - [F1891_MOUSE]                                                                | 20.86 | 2 | 2 | 2 | 3  | 1.19  | 1.03  | 1.57 | 0.83 |
| D3Z2N8   | Coiled-coil domain-containing protein 67 (Fragment) OS=Mus musculus GN=Ccdc67 PE=2 SV=1 - [D3Z2N8_MOUSE]                                 | 6.05  | 3 | 2 | 4 | 11 | 0.83  | 0.09  | 0.59 | 0.80 |
| Q921C1   | Gap junction gamma-3 protein OS=Mus musculus GN=Gjc3 PE=2 SV=2 - [CXG3_MOUSE]                                                            | 8.92  | 1 | 2 | 2 | 4  | -0.29 | -1.78 | 0.56 | 0.79 |
| Q3UZP4   | Small VCP/p97-interacting protein OS=Mus musculus GN=Svip PE=2 SV=1 - [SVIP_MOUSE]                                                       | 32.47 | 1 | 2 | 2 | 27 | 0.67  | -0.07 | 0.79 | 0.78 |
| Q60773   | Cyclin-dependent kinase 4 inhibitor D OS=Mus musculus GN=Cdkn2d PE=1 SV=2 - [CDN2D_MOUSE]                                                | 18.67 | 1 | 2 | 2 | 3  | 1.06  | 0.12  | 1.12 | 0.78 |
| Q8BLR5   | PH and SEC7 domain-containing protein 4 OS=Mus musculus GN=Psd4 PE=2 SV=1 - [PSD4_MOUSE]                                                 | 4.88  | 1 | 2 | 3 | 17 | -0.49 | 2.79  | 0.69 | 0.72 |
| P03911   | NADH-ubiquinone oxidoreductase chain 4 OS=Mus musculus GN=Mtnd4 PE=1 SV=1 - [NU4_MOUSE]                                                  | 4.79  | 1 | 2 | 2 | 13 | -0.22 | -0.05 | 0.58 | 0.71 |
| G3X919   | T-box transcription factor TBX18 OS=Mus musculus GN=Tbx18 PE=4 SV=1 - [G3X919_MOUSE]                                                     | 5.22  | 2 | 2 | 2 | 2  | 0.57  | 1.04  | 0.69 | 0.69 |
| B2RPV6   | Multimerin-1 OS=Mus musculus GN=Mmm1 PE=2 SV=2 - [MMR1_MOUSE]                                                                            | 4.63  | 3 | 2 | 4 | 17 | -0.38 | -0.17 | 0.66 | 0.69 |

|        |                                                                                                                      |       |   |   |   |    |       |       |      |      |
|--------|----------------------------------------------------------------------------------------------------------------------|-------|---|---|---|----|-------|-------|------|------|
| P57725 | SAM domain-containing protein SAMSN-1<br>OS=Mus musculus<br>GN=Samsn1 PE=1 SV=2<br>-[SAMN1_MOUSE]                    | 8.33  | 2 | 2 | 2 | 2  | 1.88  | 2.17  | 0.71 | 0.66 |
| Q6X7S9 | EP300-interacting inhibitor of differentiation 2<br>OS=Mus musculus<br>GN=Eid2 PE=1 SV=1<br>-[EID2_MOUSE]            | 9.75  | 1 | 2 | 2 | 4  | 0.81  | -0.64 | 1.21 | 0.66 |
| Q9CZT5 | Vasorin<br>OS=Mus musculus<br>GN=Vasn PE=2 SV=2<br>-[VASN_MOUSE]                                                     | 6.09  | 1 | 2 | 2 | 3  | 0.59  | -0.41 | 0.68 | 0.65 |
| Q99PW8 | Kinesin-like protein KIF17<br>OS=Mus musculus<br>GN=Kif17 PE=1 SV=1<br>-[KIF17_MOUSE]                                | 4.43  | 4 | 2 | 3 | 4  | 0.61  | -0.11 | 0.81 | 0.64 |
| Q8CBX9 | Basic immunoglobulin-like variable motif-containing protein<br>OS=Mus musculus<br>GN=Bivm PE=2 SV=1<br>-[BIVM_MOUSE] | 4.98  | 1 | 2 | 2 | 2  | 0.40  | 1.01  | 0.54 | 0.62 |
| Q00519 | Xanthine dehydrogenase/oxidase<br>OS=Mus musculus<br>GN=Xdh PE=1 SV=5<br>-[XDH_MOUSE]                                | 2.70  | 2 | 2 | 4 | 10 | 1.01  | 0.90  | 0.65 | 0.61 |
| Q9JJ94 | Sjogren syndrome nuclear autoantigen 1 homolog<br>OS=Mus musculus<br>GN=Ssna1 PE=1 SV=1<br>-[SSNA1_MOUSE]            | 23.53 | 1 | 2 | 2 | 6  | 3.20  | 1.51  | 1.37 | 0.60 |
| Q8R1M0 | UPF0361 protein C3orf37 homolog<br>OS=Mus musculus<br>GN=Cc037 PE=2 SV=1<br>-[CC037_MOUSE]                           | 6.52  | 1 | 2 | 2 | 5  | 2.27  | 0.16  | 0.64 | 0.59 |
| J3KMT3 | Protein Gm6882<br>OS=Mus musculus<br>GN=Gm6882 PE=4 SV=1<br>-[J3KMT3_MOUSE]                                          | 10.86 | 1 | 2 | 2 | 3  | -0.24 | 0.84  | 0.87 | 0.59 |
| P57016 | Ladinin-1<br>OS=Mus musculus<br>GN=Lad1 PE=1 SV=1<br>-[LAD1_MOUSE]                                                   | 5.68  | 1 | 2 | 2 | 3  | -0.52 | -0.11 | 0.67 | 0.58 |
| Q8BHW4 | Protein 493343017Rik<br>OS=Mus musculus<br>GN=493343017Rik PE=2 SV=1<br>-[Q8BHW4_MOUSE]                              | 5.25  | 1 | 2 | 2 | 2  | 0.38  | 0.26  | 0.99 | 0.58 |
| Q8R100 | Protein FAM26E<br>OS=Mus musculus<br>GN=Fam26e PE=2 SV=1<br>-[FA26E_MOUSE]                                           | 10.68 | 1 | 2 | 2 | 3  | -0.17 | 1.08  | 0.61 | 0.58 |
| Q8BH02 | Torsin-4A<br>OS=Mus musculus<br>GN=Tor4a PE=2 SV=1<br>-[TOR4A_MOUSE]                                                 | 9.62  | 1 | 2 | 2 | 2  | 0.58  | -2.05 | 0.70 | 0.57 |
| P98086 | Complement C1q subcomponent subunit A<br>OS=Mus musculus<br>GN=C1qa PE=1 SV=2<br>-[C1QA_MOUSE]                       | 10.20 | 1 | 2 | 2 | 13 | -0.07 | 0.83  | 0.71 | 0.57 |
| A6PWR8 | Ubiquitin carboxyl-terminal hydrolase 43<br>OS=Mus musculus<br>GN=Usp43 PE=2 SV=1<br>-[A6PWR8_MOUSE]                 | 2.31  | 3 | 2 | 3 | 3  | 0.85  | 1.30  | 0.70 | 0.56 |
| P61226 | Ras-related protein Rap-2b<br>OS=Mus musculus<br>GN=Rap2b PE=1 SV=1<br>-[RAP2B_MOUSE]                                | 50.82 | 1 | 2 | 7 | 51 | -0.57 | 0.81  | 0.62 | 0.56 |
| F6VUT6 | Protein Gm8251<br>OS=Mus musculus<br>GN=Gm8251 PE=4 SV=1<br>-[F6VUT6_MOUSE]                                          | 2.16  | 1 | 2 | 3 | 5  | 0.68  | 0.35  | 0.52 | 0.56 |

|        |                                                                                                           |       |   |   |    |     |       |       |      |      |
|--------|-----------------------------------------------------------------------------------------------------------|-------|---|---|----|-----|-------|-------|------|------|
| Q8VEH6 | COBW domain-containing protein 1<br>OS=Mus musculus<br>GN=Cbw1 PE=2 SV=1 -<br>[CBWD1_MOUSE]               | 7.38  | 2 | 2 | 2  | 6   | 0.73  | 0.54  | 0.64 | 0.55 |
| E9Q800 | Mitochondrial inner membrane protein<br>OS=Mus musculus<br>GN=Immf PE=2 SV=1 -<br>[E9Q800_MOUSE]          | 68.63 | 2 | 2 | 51 | 290 | 0.42  | 0.67  | 0.90 | 0.53 |
| Q8BVL9 | Janus kinase and microtubule-interacting protein 1 OS=Mus musculus GN=Jakmp1 PE=1 SV=2 -<br>[JKIP1_MOUSE] | 34.82 | 5 | 2 | 21 | 77  | 1.18  | 0.90  | 1.02 | 0.52 |
| Q52KR3 | Protein prune homolog 2<br>OS=Mus musculus<br>GN=Prune2 PE=2 SV=2 -<br>[PRUN2_MOUSE]                      | 6.65  | 4 | 2 | 14 | 47  | 0.38  | 0.72  | 0.53 | 0.50 |
| E9Q166 | Protein Atad2b OS=Mus musculus GN=Atad2b PE=2 SV=1 -<br>[E9Q166_MOUSE]                                    | 2.40  | 1 | 2 | 3  | 3   | -0.15 | -0.09 | 0.52 | 0.50 |
| Q61496 | Probable ATP-dependent RNA helicase DDX4<br>OS=Mus musculus<br>GN=Ddx4 PE=1 SV=2 -<br>[DDX4_MOUSE]        | 7.98  | 2 | 2 | 5  | 20  | 0.80  | 1.09  | 0.51 | 0.48 |
| Q4KMS1 | Tripartite motif-containing 44 OS=Mus musculus GN=Trim44 PE=2 SV=1 -<br>[Q4KMS1_MOUSE]                    | 12.75 | 3 | 2 | 2  | 4   | 0.99  | 0.73  | 0.71 | 0.48 |
| Q80VA0 | N-acetylgalactosaminyltransferase 7 OS=Mus musculus GN=Galnt7 PE=2 SV=2 -<br>[GALT7_MOUSE]                | 3.81  | 3 | 2 | 2  | 2   | -0.61 | -2.22 | 0.76 | 0.48 |
